# Supplementary material for: High-intensity interval training remodels the proteome and acetylome of human skeletal muscle
Source: PubMed Central journal article supplement (PMC9154743; doi:10.7554/elife.69802), 2022-05-31

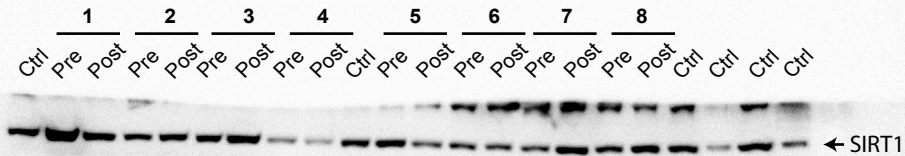

Supplement: elife-69802-fig5-data1.pdf [file elife-69802-fig5-data1.pdf]
