# Supplementary material for: High-intensity interval training remodels the proteome and acetylome of human skeletal muscle
Source: PubMed Central journal article supplement (PMC9154743; doi:10.7554/elife.69802), 2022-05-31

SIRT6 was measured on a membrane previously exposed for NAMPT

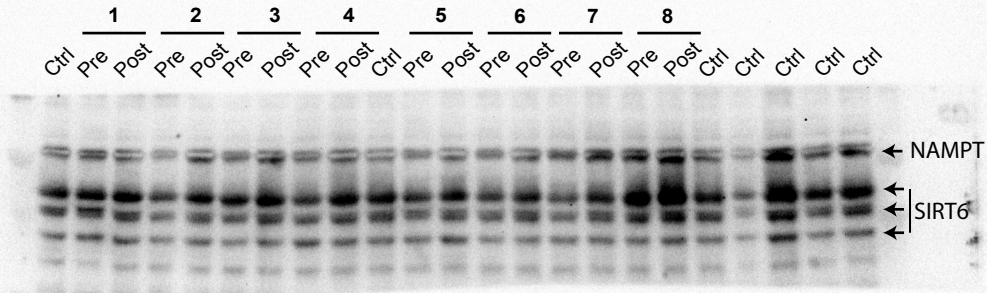

Supplement: elife-69802-fig5-data10.pdf [file elife-69802-fig5-data10.pdf]
