# Supplementary material for: High-intensity interval training remodels the proteome and acetylome of human skeletal muscle
Source: PubMed Central journal article supplement (PMC9154743; doi:10.7554/elife.69802), 2022-05-31

1      2      3                      5      6      7      8  
Ctrl Pre Post Pre Post Pre Post Ctrl Ctrl Ctrl Pre Post Pre Post Pre Post Pre Post Ctrl Ctrl Ctrl Ctrl

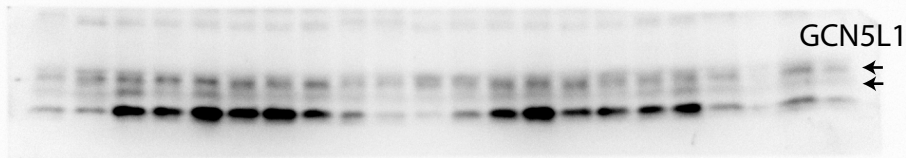

Supplement: elife-69802-fig5-data13.pdf [file elife-69802-fig5-data13.pdf]
