# Supplementary material for: High-intensity interval training remodels the proteome and acetylome of human skeletal muscle
Source: eLife journal article supplement (doi:10.7554/elife.69802), 2022-05-12
Supplement: fig3-figsupp1-data1 [file elife-69802-fig3-figsupp1-data1-v1.pdf]

1 2 3 4 5 6 7 8  
Ctrl Pre Post Pre Post Pre Post Pre Post Ctrl Pre Post Pre Post Pre Post Pre Post Ctrl Ctrl Ctrl Ctrl

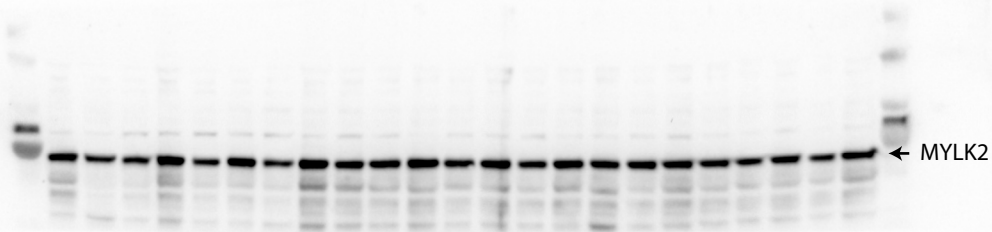

← MYLK2
