# Supplementary material for: High-intensity interval training remodels the proteome and acetylome of human skeletal muscle
Source: eLife journal article supplement (doi:10.7554/elife.69802), 2022-05-12

1      2      3                      5      6      7      8  
Ctrl Pre Post Pre Post Pre Post Ctrl Ctrl Pre Post Pre Post Pre Post Pre Post Ctrl Ctrl Ctrl Ctrl

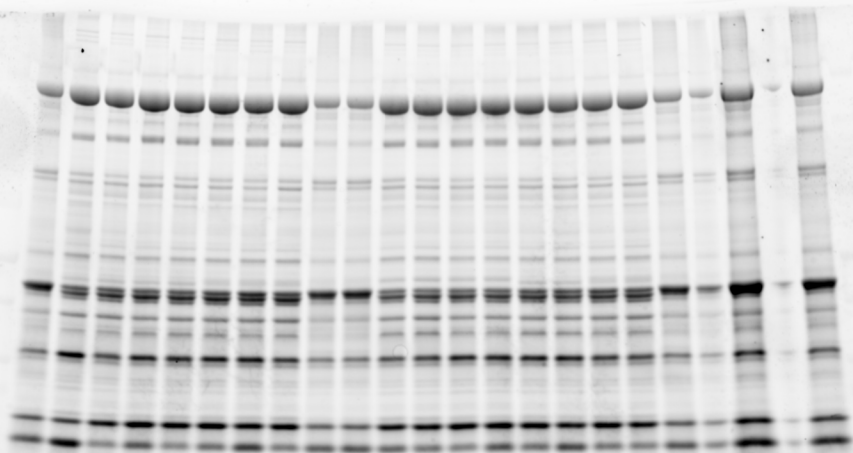

Supplement: fig5-figsupp2-data3 [file elife-69802-fig5-figsupp2-data3-v1.pdf]
