# Supplementary material for: High-intensity interval training remodels the proteome and acetylome of human skeletal muscle
Source: eLife journal article supplement (doi:10.7554/elife.69802), 2022-05-12

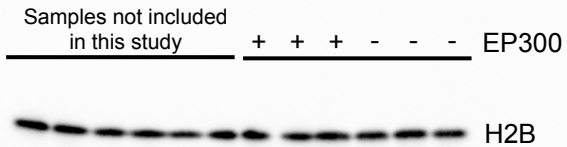

Supplement: fig7-data1 [file elife-69802-fig7-data1-v1.pdf]
