# Supplementary material for: High-intensity interval training remodels the proteome and acetylome of human skeletal muscle
Source: eLife journal article supplement (doi:10.7554/elife.69802), 2022-05-12
Supplement: fig7-data8 [file elife-69802-fig7-data8-v1.pdf]

Samples not included  
in this study

+ + + - - -

EP300

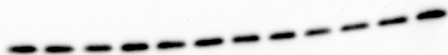

H3 K23
