# Supplementary material for: High-intensity interval training remodels the proteome and acetylome of human skeletal muscle
Source: eLife. 2022 May 31;11:e69802. doi: 10.7554/eLife.69802 (PMC9154743; doi:10.7554/eLife.69802)
Supplement: Figure 1—source data 1. [file elife-69802-fig1-data1.xlsx]

## Sheet: Figure 1
		Subject Characteristics							Performance				Substrate utilization at rest and during cycling																				Mitochondrial function/respiration
													Bike rest					50W					100W					150W
ID	Time	Age	Height	Weight	BMI	LBM	ThighLM	FM	VO2max	VO2max/kg	iPPO	iPPO/ThighLM	VO2	VCO2	RER	FOX	COX	O2	CO2	RER	FOX	COX	O2	CO2	RER	FOX	COX	O2	CO2	RER	FOX	COX	LN	FAO	CID	PD	P	E	ECII	CS-activity
1	Pre	24	185	85.3	24.9233	62.9271	8.58633	18.0866	3813.8	44.7104	380	44.2564	261.833	208.333	0.796667	89.4166	103.504	963.5	853	0.885	182.164	756.135	1352.83	1249.33	0.921667	167.921	1286.06	2016.17	1926.17	0.956667	140.977	2195.76	15.3799	28.8345	32.6338	59.453	61.2415	67.5765	39.0471	50.9549
2	Pre	24	183	71	21.201	56.5192	7.01796	11.4341	3815	53.7324	340	48.4471	332.667	283.167	0.853333	82.1902	211.764	1121.33	929.5	0.826667	319.567	605.327	1501	1349.83	0.9	248.115	1269.1	1996.83	1866.83	0.935	209.136	1997.2	3.2339	20.4152	26.0791	47.5239	50.5406	63.6759	33.7141	58.3765
3	Pre	33	183	76.1	22.7239	58.3083	7.47372	15.5953	3867.6	50.8226	345	46.1618	314	289.5	0.923333	39.7763	296.413	1000.67	858.667	0.856667	235.524	666.986	1474.17	1291.5	0.876667	301.857	1097.83	2053	2067	1.00833	-36.1462	2694.79	6.55035	24.7894	29.6125	57.8711	65.7347	78.8682	48.6473	66.3236
4	Pre	24	190	103	28.5319	60.5948	8.18234	38.2598	3353.6	32.5592	332.5	40.6363	418.833	325.167	0.776667	156.795	130.446	1290.83	1006.67	0.78	475.603	421.69	1737.83	1450.17	0.836667	478.875	979.987	2124.5	2024.83	0.955	156.767	2292.75	3.7069	17.6263	20.5684	35.3074	37.5842	56.1365	27.9478	44.428
5	Pre	27	194	89.1	23.6741	63.5133	8.74607	21.4359	3977.8	44.6442	365	41.733	445	392	0.876667	87.4664	340.678	1270.17	1164.67	0.916667	171.818	1171.31	1740.83	1655.83	0.951667	134.123	1864.22	2169.83	2189.5	1.01	-46.4886	2869.3	3.01025	14.5136	20.873	38.9959	42.2109	58.7606	28.9938	29.6027
6	Pre	38	185	81.6	23.8422	59.3282	7.79625	19.776	3347	41.0172	322.5	41.366	360.333	280	0.776667	134.47	113.317	1053.83	788.833	0.746667	444.427	200.885	1596.67	1375.33	0.861667	366.893	1087.03	1903.83	1623.5	0.853333	465.409	1224.83	0.5468	10.7107	15.349	33.3122	38.1249	55.2297	24.5879	54.0914
7	Pre	26	180	73.1	22.5617	52.6082	6.56096	18.3591	3148.6	43.0725	302.5	46.1061	327.667	210.167	0.643333	197.888	-90.0441	1157.83	848.333	0.731667	519.499	141.012	1498.83	1262	0.841667	393.847	894.179	1959.33	1862.67	0.948333	152.66	2093.88	4.27885	23.8389	29.6242	49.2649	56.2759	98.0352	36.6689	40.0403
8	Pre	23	193	78	20.9402	58.7207	7.56296	14.7707	4032.2	51.6949	333.333	44.0745	291.833	263.667	0.903333	46.1459	252.044	1310.33	1219.67	0.931667	146.347	1287.28	1502	1476.67	0.985	34.0654	1817	2106.67	2065.83	0.981667	56.8029	2525.45	7.3114	23.8533	31.8543	58.8642	61.5465	70.1185	44.6944	70.0126
1	Post	24	185	84.1	24.5727	63.9848	8.87887	16.9279	4152	49.3698	432	48.6548	238.833	149.167	0.626667	151.074	-83.1123	995.143	725.857	0.725714	452.068	106.968	1631.83	1415.33	0.868333	358.46	1153.14	2227.33	1967.67	0.886667	428.313	1729.65	5.92075	20.0598	30.489	66.7957	71.2063	75.4048	44.6475	92.5184
2	Post	24	183	69.2	20.6635	56.5877	7.1763	10.5032	4118.6	59.5173	399	55.5997	298.667	244.667	0.818333	90.0491	148.594	1188.5	914.167	0.77	459.497	333.122	1595.67	1323.33	0.83	453.652	864.205	2263	2011.83	0.89	413.644	1812.34	13.7356	32.4246	36.2251	66.9383	74.669	74.669	58.1919	67.1998
3	Post	33	183	77.6	23.1718	60.4004	7.88656	14.9612	4337.6	55.8969	391	49.578	335.167	301.333	0.896667	55.525	283.025	1043.5	916	0.876667	210.602	784.929	1624	1523.29	0.937143	161.557	1646.07	2134.67	2144.33	1.005	-29.2655	2780.75	7.3079	30.3004	36.0858	73.5566	76.3792	81.5989	44.8801	79.7848
4	Post	24	190	100.1	27.7285	60.7213	8.28887	35.4711	4199	41.9481	398.5	48.0765	343.333	302.667	0.881667	67.0953	263.813	1328.5	1103.17	0.83	375.302	725.59	1726	1551.83	0.901667	285.883	1457.85	2179.83	2083.5	0.955	150.765	2378.23	8.1827	25.5397	29.0519	53.082	56.0084	75.7142	44.2608	70.7997
5	Post	27	194	88.9	23.621	64.4201	9.02249	20.8507	4714	53.0259	430	47.6587	374.167	271.833	0.726667	171.807	35.495	1326.5	1028.33	0.776667	499.206	406.639	1780.5	1439.33	0.813333	569.625	802.329	2137	1783	0.836667	589.315	1203.97	8.7022	21.7442	29.8247	53.8035	57.6087	71.4287	37.9522	60.4403
6	Post	38	185	81.4	23.7838	59.8255	7.93014	19.408	4156.8	51.0663	367.5	46.3422	429.333	328.833	0.768333	168.359	114.24	1141.83	849	0.743333	491.243	192.881	1584	1283.5	0.81	501.631	726.877	2237.5	2264.67	1.01167	-59.6507	2988.7	9.94145	25.3223	26.5383	44.8688	49.8303	53.7841	26.1606	70.2855
7	Post	26	180	72.2	22.284	53.7895	6.79757	16.3231	3537	48.9889	334	49.1352	335.167	269.5	0.808333	109.675	144.743	1156.33	887.833	0.763333	449.767	317.192	1620.67	1342.17	0.828333	463.991	869.491	2166.17	1901.33	0.878333	437.471	1628.74	8.12955	35.2052	43.3615	71.3537	80.6991	107.056	44.2349	72.737
8	Post	23	193	80.8	21.6919	60.7143	7.80737	16.9949	4387.6	54.302	452.5	57.9581	493.833	477	0.965	25.6554	560.442	1143.83	1025	0.896667	195.257	951.304	1481.17	1447.5	0.976667	48.3649	1754.07	2187.33	2128.33	0.971667	87.2199	2550.03	7.49325	27.8588	40.7956	74.9313	81.244	98.6122	51.7022	74.9279
PRE mean		27.375	186.625	82.15	23.5498	59.065	7.74082	19.7147	3669.45	45.2817	340.104	44.0976	344.021	281.5	0.81875	104.268	169.765	1146.06	958.667	0.834375	311.869	656.328	1550.52	1388.83	0.896875	265.712	1286.92	2041.27	1953.29	0.956042	137.39	2236.75	5.50229	20.5727	25.8243	47.5741	51.6574	68.5501	35.5377	51.7288
POST mean		27.375	186.625	81.7875	23.4396	60.0554	7.97352	18.93	4200.32	51.7644	400.562	50.3754	356.062	293.125	0.811458	104.905	183.405	1165.52	931.17	0.797798	391.618	477.328	1630.48	1415.79	0.870685	355.395	1159.25	2191.6	2035.58	0.929375	252.227	2134.05	8.67667	27.3069	34.0465	63.1663	68.4556	79.7834	44.0038	73.5867
% change		0	0	-0.441266	-0.467724	1.67693	3.00612	-3.98013	14.4674	14.3164	17.7764	14.236	3.50027	4.12966	-0.890585	0.610508	8.03436	1.69758	-2.86826	-4.38381	25.5715	-27.2729	5.15687	1.94065	-2.92019	33.7521	-9.92064	7.36469	4.21297	-2.78928	83.5849	-4.59128	57.692	32.7333	31.8391	32.7745	32.5186	16.387	23.823	42.2549
			ID	Participant ID
			Time	Time point
			Age	Age (years)
			Height	Height (cm)
			Weight	Weight (kg)
			BMI	Body mass index (kg/m2)
			LBM	Lean body mass (kg)
			ThighLM	Thigh lean mass (kg)
			FM	Fat mass (kg)
			VO2max	VO2max (mL/min)
			VO2max/kg	VO2max (mL/kg/min)
			iPPO	Peak power output (W)
			iPPO/ThighLM	Peak power output/thigh leann mass (W/kg)
			VO2	Oxygen uptake (mL/min)
			VCO2	Carbon dioxide producton (mL/min)
			RER	Respratory exchange ratio (VCO2/VO2)
			FOX	Fat oxidation (mg/min)
			COX	Carbohydrate oxidation (mg/min)
			LN	Leak respiration (pmol/s/mg)
			FAO	Fatty acid oxidation (pmol/s/mg)
			CID	Submaximal complex I respiration (pmol/s/mg)
			PD	Submaximal complex I+II respiration (pmol/s/mg)
			P	Oxidative phosphorylation capacity (pmol/s/mg)
			E	Electron transport system capacity (pmol/s/mg)
			ECII	Succinate-supported electron transport system capacity (pmol/s/mg)
			CS-activity	Citrate sythase activity (umol/g/min)
