# Supplementary material for: High-intensity interval training remodels the proteome and acetylome of human skeletal muscle
Source: eLife. 2022 May 31;11:e69802. doi: 10.7554/eLife.69802 (PMC9154743; doi:10.7554/eLife.69802)
Supplement: Figure 2—figure supplement 1—source data 3. [file elife-69802-fig2-figsupp1-data3.xlsx]

## Sheet: 200615 OXPHOS
200615 ACE_A OXPHOS #381 8secQI					COMPLEX I																		COMPLEX I					COMPLEX II					COMPLEX III				Complex I (relative to mean Pre)				Complex II (relative to mean Pre)				Complex III (relative to mean Pre)
Lane	Volume (Int)	Adj. Vol. (Int)	Mean Bkgd. (Int)	# of Pixels	Min. Value (Int)	Max. Value (Int)	Mean Value (Int)	Std. Dev.	Area (mm2)		Sample	Input (uL)											PRE	POST	RATIO			PRE	POST	RATIO			PRE	POST	RATIO			PRE	POST			PRE	POST			PRE	POST
1	20441112	1.47443e+07	5885.12	968	2684	50712	21116.9	14022.9	10.2157		Ctrl	8	1.06272									1	0.746858	1.27332	1.7049		1	0.956197	1.4988	1.56746		1	0.776731	1.39775	1.79953		1	0.783457	1.33572		1	0.962025	1.50794		1	0.801319	1.442
2	16060504	1.03621e+07	6310.58	903	3996	42972	17785.7	11368.3	9.52974		1.A	8	0.746858									2	1.21931	1.19805	0.982565		2	1.2974	1.15946	0.893675		2	1.27282	1.453	1.14156		2	1.27906	1.25676		2	1.30531	1.16653		2	1.31311	1.499
3	26364432	17666292	8786	990	5492	56036	26630.7	15240.7	10.4479		1.B	8	1.27332									3	0.919832	1.09033	1.18536		3	1.12086	1.265	1.1286		3	1.30384	1.26616	0.971105		3	0.964908	1.14376		3	1.12769	1.27271		3	1.34511	1.30625
4	25470672	1.69169e+07	8640.17	990	5344	55656	25728	14990.4	10.4479		2.A	8	1.21931									4	0.962599	1.08143	1.12345		4	0.955446	0.983933	1.02982		4	0.896462	1.34601	1.50147		4	1.00977	1.13442		4	0.96127	0.989931		4	0.924841	1.38862
5	25826644	16621952	9528.67	966	5984	56996	26735.7	15091.6	10.1946		2.B	8	1.19805									5	0.792029	1.00353	1.26703		5	0.511113	0.59826	1.1705		5	0.633404	1.02937	1.62514		5	0.830842	1.0527		5	0.514229	0.601907		5	0.653455	1.06196
6	20021812	1.27619e+07	8066.54	900	4960	48696	22246.5	12810.5	9.49808		3.A	8	0.919832									6	0.990935	1.16684	1.17752		6	1.20705	0.999928	0.828409		6	0.931712	1.10527	1.18628		6	1.0395	1.22402		6	1.2144	1.00602		6	0.961207	1.14026
7	22054932	1.51275e+07	6997.45	990	4684	48468	22277.7	13509.3	10.4479		3.B	8	1.09033									7	0.912765	1.0491	1.14936		7	0.704162	0.930309	1.32116		7	0.853516	0.819897	0.960611		7	0.957494	1.10051		7	0.708454	0.93598		7	0.880536	0.845853
8	20023712	1.33553e+07	6314.81	1056	4128	45056	18961.8	11947.2	11.1444		4.A	8	0.962599									8	1.08195	1.09046	1.00786		8	1.1993	1.18513	0.988185		8	1.08604	1.10658	1.01892		8	1.13498	1.1439		8	1.20661	1.19236		8	1.12042	1.14161
9	22364924	1.50039e+07	7302.56	1008	4816	49256	22187.4	13042.8	10.6378		4.B	8	1.08143									Mean	0.953285	1.11913	1.19976		Mean	0.993941	1.0776	1.11598		Mean	0.969315	1.19051	1.27558		Mean	1	1.17397		Mean	1	1.08417		Mean	1	1.22819
10	18871940	1.25559e+07	6994.48	903	4876	47340	20899.2	12168.6	9.52974		Ctrl	8	0.904984									SD	0.151282	0.0875218	0.224487		SD	0.271448	0.266474	0.240516		SD	0.235342	0.213604	0.323257		SD	0.158696	0.0918108		SD	0.273102	0.268099		SD	0.242792	0.220366
11	17229684	1.09888e+07	6754.24	924	4644	44064	18646.8	11053.2	9.75136		5.A	8	0.792029									TTEST		0.0261534			TTEST		0.344147			TTEST		0.037659			TTEST		0.0261534		TTEST		0.344147		TTEST		0.037659
12	20943412	1.39231e+07	6937.03	1012	4584	48208	20695.1	12293.4	10.6801		5.B	8	1.00353
13	20750344	13748425	7094.14	987	4876	44916	21023.7	12087.7	10.4162		6.A	8	0.990935
14	24171996	1.6189e+07	7559.64	1056	5000	48912	22890.1	13139.6	11.1444		6.B	8	1.16684										COMPLEX IV					COMPLEX V									Complex IV (relative to mean Pre)				Complex V (relative to mean Pre)
15	19176176	1.26639e+07	7047.94	924	4544	45316	20753.4	11960.3	9.75136		7.A	8	0.912765										PRE	POST	RATIO			PRE	POST	RATIO								PRE	POST			PRE	POST
16	21748628	1.45554e+07	7611.88	945	5116	49936	23014.4	13306	9.97298		7.B	8	1.0491									1	0.930899	1.30825	1.40536		1	0.853054	1.26006	1.47712							1	0.951238	1.33684		1	0.776419	1.14686
17	23296744	1.50112e+07	8369.19	990	5232	49992	23532.1	12780.8	10.4479		8.A	8	1.08195									2	1.21848	1.20646	0.990132		2	1.33714	1.43459	1.07288							2	1.2451	1.23282		2	1.21702	1.30571
18	23427324	1.51292e+07	8017.49	1035	5536	49536	22635.1	12963.5	10.9228		8.B	8	1.09046									3	0.977174	1.06671	1.09162		3	1.38964	1.42976	1.02887							3	0.998524	1.09001		3	1.2648	1.30131
19	20961368	14322340	6858.5	968	4276	47992	21654.3	12946.1	10.2157		Ctrl	8	1.0323									4	1.03212	1.12583	1.0908		4	1.11884	1.33501	1.19321							4	1.05467	1.15043		4	1.01833	1.21508
20	11951844	7.9641e+06	5247.03	760	3476	43780	15726.1	10576.5	8.0206		Ctrl	4	1.38742e+07									5	0.799647	0.912485	1.14111		5	0.939353	1.0929	1.16346							5	0.817118	0.932422		5	0.854966	0.994722
21	7173540	4.35862e+06	4357.45	646	2316	29740	11104.6	6972.37	6.81751		Ctrl	2										6	0.998571	1.05783	1.05934		6	1.11698	1.11004	0.993785							6	1.02039	1.08094		6	1.01664	1.01032
22	25823828	1.83791e+07	7049.89	1056	2956	53116	24454.4	14702.6	11.1444		Ctrl	12										7	0.869199	1.0272	1.18178		7	0.977729	1.01716	1.04033							7	0.88819	1.04965		7	0.889894	0.925783
																						8	1.00286	1.01938	1.01648		8	1.05688	1.0934	1.03455							8	1.02477	1.04166		8	0.961934	0.995171
200615 ACE_A OXPHOS #381 7secQII					COMPLEX II																	Mean	0.978618	1.09052	1.12208		Mean	1.0987	1.22161	1.12553							Mean	1	1.11434		Mean	1	1.11187
Lane	Volume (Int)	Adj. Vol. (Int)	Mean Bkgd. (Int)	# of Pixels	Min. Value (Int)	Max. Value (Int)	Mean Value (Int)	Std. Dev.	Area (mm2)		Sample	Input (uL)										SD	0.124019	0.122181	0.130154		SD	0.186838	0.16487	0.157951							SD	0.126728	0.124851		SD	0.170053	0.150059
1	14513556	1.05034e+07	5141.18	780	2940	49972	18607.1	13106.4	8.23167		Ctrl	8	1.10449									TTEST		0.0334483			TTEST		0.0375798								TTEST		0.0334483		TTEST		0.0375798
2	13293856	9.0932e+06	6141.31	684	4052	46460	19435.5	12014	7.21854		1.A	8	0.956197
3	20755460	1.42532e+07	7560.74	860	4656	55708	24134.3	15360.3	9.07594		1.B	8	1.4988
4	18161688	1.2338e+07	6932.97	840	4556	52532	21621.1	13790.6	8.86487		2.A	8	1.2974
5	16660960	11026160	6403.18	880	4188	48848	18932.9	12827.8	9.28701		2.B	8	1.15946
6	16088892	1.06591e+07	6621.71	820	4016	48924	19620.6	12160.8	8.65381		3.A	8	1.12086
7	17422252	1.20298e+07	6419.56	840	3648	47712	20740.8	13176.5	8.86487		3.B	8	1.265
8	13692716	9.08606e+06	5638.5	817	4088	38876	16759.8	10050.4	8.62214		4.A	8	0.955446
9	13961456	9.35697e+06	5481.53	840	3248	42688	16620.8	11014.1	8.86487		4.B	8	0.983933
10	11683880	7.79005e+06	5123.47	760	3388	40808	15373.5	10000.5	8.0206		Ctrl	8	0.819163
11	8331064	4.86056e+06	4030.78	861	2668	27056	9676.03	6036.15	9.0865		5.A	8	0.511113
12	9356136	5.68931e+06	4263.75	860	2856	28612	10879.2	6970.28	9.07594		5.B	8	0.59826
13	16663960	1.14787e+07	5611.73	924	3644	46064	18034.6	11980.1	9.75136		6.A	8	1.20705
14	14197616	9.50907e+06	4956.18	946	3080	40264	15008.1	10139.7	9.98354		6.B	8	0.999928
15	10614056	6.69641e+06	4777.62	820	3340	32624	12944	8094.06	8.65381		7.A	8	0.704162
16	13662732	8847012	5460	882	2632	39100	15490.6	9689.91	9.30812		7.B	8	0.930309
17	17089268	1.14051e+07	6444.65	882	3908	45072	19375.6	11834.5	9.30812		8.A	8	1.1993
18	16547736	1.12703e+07	6129.38	861	4124	44152	19219.2	11584.4	9.0865		8.B	8	1.18513
19	14967332	1.02358e+07	5632.78	840	3576	44508	17818.3	11912.7	8.86487		Ctrl	8	1.07635
20	5610380	3.18737e+06	3355.97	722	1776	26452	7770.61	5783.91	7.61957		Ctrl	4	9.50976e+06
21	2734436	1.21369e+06	2795.49	544	1228	13456	5026.54	2814.94	5.74106		Ctrl	2
22	21498748	1.58977e+07	5416.85	1034	1924	51272	20791.8	14911	10.9122		Ctrl	12
200615 ACE_A OXPHOS #381 10secQIII					COMPLEX III
Lane	Volume (Int)	Adj. Vol. (Int)	Mean Bkgd. (Int)	# of Pixels	Min. Value (Int)	Max. Value (Int)	Mean Value (Int)	Std. Dev.	Area (mm2)		Sample	Input (uL)
1	7667696	4.61348e+06	3420.18	893	1328	23876	8586.45	6043.73	9.42421		Ctrl	8	1.05757
2	6754484	3388349	3937	855	2148	19584	7899.98	4771.27	9.02318		1.A	8	0.776731
3	11169148	6.09744e+06	5802.87	874	2716	31060	12779.3	8188.04	9.22369		1.B	8	1.39775
4	9788340	5.55244e+06	5115.82	828	3748	27328	11821.7	7033.18	8.73823		2.A	8	1.27282
5	11254408	6.33847e+06	5504.97	893	3204	30124	12602.9	7740	9.42421		2.B	8	1.453
6	9888860	5.68776e+06	5073.79	828	3280	29868	11943.1	7408.58	8.73823		3.A	8	1.30384
7	9979280	5.52341e+06	5453.94	817	3396	29900	12214.5	7480.17	8.62214		3.B	8	1.26616
8	8077728	3.91065e+06	4569.16	912	3172	21368	8857.16	4796.09	9.62472		4.A	8	0.896462
9	10322832	5.87173e+06	4735.22	940	2384	28568	10981.7	7269.14	9.92022		4.B	8	1.34601
10	8072696	4.24351e+06	4381.22	874	2592	24172	9236.49	5909.02	9.22369		Ctrl	8	0.972763
11	6084344	2.76311e+06	4011.15	828	2428	17836	7348.24	3916.22	8.73823		5.A	8	0.633404
12	7995376	4.49044e+06	4327.08	810	2448	24704	9870.83	5927.05	8.54827		5.B	8	1.02937
13	7824952	4.06443e+06	4541.7	828	2192	22100	9450.43	5408.95	8.73823		6.A	8	0.931712
14	8876568	4.82153e+06	5006.22	810	2852	26108	10958.7	6345.96	8.54827		6.B	8	1.10527
15	7268428	3.72331e+06	4476.16	792	2472	21536	9177.31	5064.8	8.35831		7.A	8	0.853516
16	7542552	3576656	5302	748	3088	20176	10083.6	4767.28	7.89396		7.B	8	0.819897
17	9044040	4.73764e+06	5036.73	855	2636	24804	10577.8	6194.99	9.02318		8.A	8	1.08604
18	8506716	4.82727e+06	4542.52	810	2592	24036	10502.1	5919.48	8.54827		8.B	8	1.10658
19	7446476	4.22998e+06	3970.98	810	1900	24088	9193.18	5753.28	8.54827		Ctrl	8	0.969662
20	4598620	2829736	2738.21	646	1220	22068	7118.61	5134.34	6.81751		Ctrl	4	4.36232e+06
21	2435400	1.27527e+06	2416.94	480	1048	15460	5073.75	3216.39	5.06564		Ctrl	2
22	9695728	6.02568e+06	3598.08	1020	1328	23508	9505.62	6368	10.7645		Ctrl	12
200615 ACE_A OXPHOS #381 7secQIV					COMPLEX IV
Lane	Volume (Int)	Adj. Vol. (Int)	Mean Bkgd. (Int)	# of Pixels	Min. Value (Int)	Max. Value (Int)	Mean Value (Int)	Std. Dev.	Area (mm2)		Sample	Input (uL)
1	18162684	1.26023e+07	6318.67	880	3348	50252	20639.4	13901.8	9.28701		Ctrl	8	1.09009
2	16127052	1.07619e+07	6566.88	817	4660	48812	19739.4	13364.1	8.62214		1.A	8	0.930899
3	23077548	1.51244e+07	8644.71	920	5484	57368	25084.3	15380.9	9.70915		1.B	8	1.30825
4	21595528	1.40866e+07	8591.46	874	5544	54120	24708.8	15040.4	9.22369		2.A	8	1.21848
5	21356600	1.39476e+07	8419.33	880	5452	55808	24268.9	14999.9	9.28701		2.B	8	1.20646
6	17770096	1.12969e+07	7406.42	874	4912	46452	20331.9	12537.8	9.22369		3.A	8	0.977174
7	18613976	12331952	6503.13	966	4320	47480	19269.1	13047.9	10.1946		3.B	8	1.06671
8	17848536	1.19321e+07	6354.97	931	4000	45732	19171.4	12581.8	9.82523		4.A	8	1.03212
9	19579596	1.30154e+07	7197.54	912	4392	47848	21468.9	13021.3	9.62472		4.B	8	1.12583
10	14961924	9.81219e+06	6303.22	817	3772	45300	18313.2	12006.6	8.62214		Ctrl	8	0.848749
11	13969356	9.24454e+06	5833.11	810	3892	41076	17246.1	11099.5	8.54827		5.A	8	0.799647
12	16028340	1.0549e+07	6617.52	828	3600	43016	19357.9	11742.7	8.73823		5.B	8	0.912485
13	17288036	1.15443e+07	6243.24	920	3896	43476	18791.3	11835.9	9.70915		6.A	8	0.998571
14	18382836	1.22293e+07	6890.85	893	4064	45500	20585.5	12259.3	9.42421		6.B	8	1.05783
15	15103304	1.00486e+07	6530.6	774	4452	43868	19513.3	11775.2	8.16835		7.A	8	0.869199
16	17905140	1.18753e+07	6752.38	893	4416	47796	20050.5	12581.7	9.42421		7.B	8	1.0272
17	17988912	1.15938e+07	7479.64	855	4724	46720	21039.7	12074	9.02318		8.A	8	1.00286
18	18101232	1.17849e+07	7177.7	880	4616	44548	20569.6	12154.9	9.28701		8.B	8	1.01938
19	18593780	1.22679e+07	7028.78	900	4272	47964	20659.8	12627.5	9.49808		Ctrl	8	1.06116
20	15009632	1.00623e+07	6350.87	779	3460	52488	19267.8	13496.7	8.22111		Ctrl	4	1.15608e+07
21	9168516	6.32087e+06	4653.02	612	3032	43372	14981.2	10710.9	6.45869		Ctrl	2
22	22880560	1.62924e+07	6111.42	1078	2844	56152	21225	15136.6	11.3766		Ctrl	12
200615 ACE_A OXPHOS #381 8secQV					COMPLEX V
Lane	Volume (Int)	Adj. Vol. (Int)	Mean Bkgd. (Int)	# of Pixels	Min. Value (Int)	Max. Value (Int)	Mean Value (Int)	Std. Dev.	Area (mm2)		Sample	Input (uL)
1	9487696	6.63176e+06	3733.25	765	1500	44128	12402.2	11174.6	8.07337		Ctrl	8	1.08339
2	7953304	5.2218e+06	3570.59	765	2012	38628	10396.5	9444.1	8.07337		1.A	8	0.853054
3	11482908	7.7132e+06	4552.79	828	2772	48120	13868.2	12433	8.73823		1.B	8	1.26006
4	11429660	8.18506e+06	4149.11	782	2788	48400	14615.9	13136.4	8.25277		2.A	8	1.33714
5	12513140	8.78156e+06	4178.71	893	2488	50312	14012.5	13251.4	9.42421		2.B	8	1.43459
6	12035852	8506412	4128	855	2612	49136	14077	13030.7	9.02318		3.A	8	1.38964
7	12587700	8.75198e+06	4261.91	900	2184	47996	13986.3	12710.8	9.49808		3.B	8	1.42976
8	10250468	6.84877e+06	4020.93	846	2556	38696	12116.4	10230.1	8.92819		4.A	8	1.11884
9	12442336	8.17202e+06	4841.63	882	2412	44892	14107	11605.2	9.30812		4.B	8	1.33501
10	7857460	4.46966e+06	4529.14	748	2492	40524	10504.6	8447.36	7.89396		Ctrl	8	0.730181
11	9103816	5.75006e+06	4050.42	828	2436	34392	10994.9	8350.5	8.73823		5.A	8	0.939353
12	9766232	6.69e+06	3765.28	817	1860	37704	11953.8	9718.49	8.62214		5.B	8	1.0929
13	9929532	6.83738e+06	3954.15	782	2528	37364	12697.6	9920.41	8.25277		6.A	8	1.11698
14	9914184	6.79489e+06	3850.98	810	1636	37884	12239.7	9896.69	8.54827		6.B	8	1.11004
15	8656880	5.98497e+06	3492.69	765	2164	35976	11316.2	9044.25	8.07337		7.A	8	0.977729
16	9151572	6.22635e+06	3532.88	828	2204	34956	11052.6	8837.4	8.73823		7.B	8	1.01716
17	9462780	6.46948e+06	3912.81	765	2044	37888	12369.6	9730.35	8.07337		8.A	8	1.05688
18	9469468	6.69301e+06	3427.72	810	1716	38148	11690.7	9747.09	8.54827		8.B	8	1.0934
19	7883816	5.61085e+06	3038.73	748	1576	35728	10539.9	8767.71	7.89396		Ctrl	8	0.91661
20	5062304	3.69711e+06	2245.39	608	1284	30128	8326.16	7205.98	6.41648		Ctrl	4	6.1213e+06
21	2855928	1756792	1908.22	576	576	19408	4958.21	4177.52	6.07877		Ctrl	2
22	11813084	8.09308e+06	4078.96	912	1048	41148	12952.9	10063.6	9.62472		Ctrl	12
