# Supplementary material for: High-intensity interval training remodels the proteome and acetylome of human skeletal muscle
Source: eLife. 2022 May 31;11:e69802. doi: 10.7554/eLife.69802 (PMC9154743; doi:10.7554/eLife.69802)
Supplement: Figure 3—figure supplement 1—source data 3. [file elife-69802-fig3-figsupp1-data3.xlsx]

## Sheet: MYLK2
200915 ACE_C MYLK2 #389 25secQ					MYLK2																			MYLK2					MYLK2 (relative to mean Pre)
Lane	Volume (Int)	Adj. Vol. (Int)	Mean Bkgd. (Int)	# of Pixels	Min. Value (Int)	Max. Value (Int)	Mean Value (Int)	Std. Dev.	Area (mm2)		Sample	Input (uL)												PRE	POST	RATIO				PRE	POST
1	12938632	9.0099e+06	4699.45	836	2880	35832	15476.8	9038.78	8.82266		Ctrl	20	1.00419										1	0.73226	0.68477	0.935145			1	0.597978	0.559197
2	9731260	6.57007e+06	3697.3	855	2136	28184	11381.6	6943.5	9.02318		1.A	20	0.73226										2	1.31855	0.696536	0.52826			2	1.07675	0.568806
3	9502136	6.14397e+06	4310.87	779	2428	27888	12197.9	7147.18	8.22111		1.B	20	0.68477										3	1.3293	0.723613	0.544358			3	1.08553	0.590917
4	16419024	1.18304e+07	5329.38	861	2356	47768	19069.7	12848.5	9.0865		2.A	20	1.31855										4	1.50083	1.01505	0.676323			4	1.22561	0.828907
5	9155500	6.24954e+06	3641.56	798	2044	29728	11473.1	7401.2	8.42163		2.B	20	0.696536										5	1.42009	0.861822	0.606878			5	1.15967	0.703781
6	15818452	1.19269e+07	4309.64	903	2280	47652	17517.7	13130.6	9.52974		3.A	20	1.3293										6	1.23236	0.828654	0.672411			6	1.00637	0.676696
7	9916720	6.49248e+06	3804.72	900	2284	27208	11018.6	6820.45	9.49808		3.B	20	0.723613										7	1.20635	0.982118	0.814123			7	0.98513	0.802017
8	18178472	1.34659e+07	5479.72	860	2784	55288	21137.8	14636.1	9.07594		4.A	20	1.50083										8	1.05674	0.987309	0.934299			8	0.862954	0.806256
9	13270668	9.10731e+06	4980.09	836	2800	39320	15874	10180.4	8.82266		4.B	20	1.01505										Mean	1.22456	0.847484	0.713975			Mean	1	0.692072
10	14596928	1.01406e+07	4843.82	920	3220	38948	15866.2	10074.2	9.70915		Ctrl	20	1.13021										SD	0.240617	0.136758	0.162728			SD	0.196493	0.11168
11	17604728	12741492	5034.41	966	2832	45432	18224.4	12237	10.1946		5.A	20	1.42009										TTEST		0.00262932				TTEST		0.00262932
12	11720512	7.73253e+06	4664.3	855	2656	32180	13708.2	8158.4	9.02318		5.B	20	0.861822
13	15803512	1.10571e+07	5022.62	945	2788	44356	16723.3	10991.2	9.97298		6.A	20	1.23236
14	11021596	7.43494e+06	4390.03	817	3104	32564	13490.3	8236.35	8.62214		6.B	20	0.828654
15	15285316	1.08237e+07	4849.53	920	2944	44044	16614.5	11202.8	9.70915		7.A	20	1.20635
16	13194324	8.81186e+06	4869.4	900	2752	35924	14660.4	9295.78	9.49808		7.B	20	0.982118
17	13820940	9.48138e+06	4821.73	900	2976	42240	15356.6	10193.3	9.49808		8.A	20	1.05674
18	13835672	8.85844e+06	5787.48	860	3832	38528	16088	9592.06	9.07594		8.B	20	0.987309
19	12275456	7766416	5123.91	880	3088	33604	13949.4	8263.3	9.28701		Ctrl	20	0.865599
20	9785364	5.92375e+06	5282.65	731	3648	31652	13386.3	7510.43	7.71455		Ctrl	5	8.97231e+06
21	12216476	8.10366e+06	4919.63	836	3108	34604	14613	8807.56	8.82266		Ctrl		30
22	8484916	5.54544e+06	3867.74	760	2036	28844	11164.4	6842.69	8.0206		Ctrl	10
23	16332724	1.11506e+07	4618.69	1122	2276	38372	14556.8	9646.01	11.8409		Ctrl	25
