# Supplementary material for: High-intensity interval training remodels the proteome and acetylome of human skeletal muscle
Source: eLife. 2022 May 31;11:e69802. doi: 10.7554/eLife.69802 (PMC9154743; doi:10.7554/eLife.69802)
Supplement: Figure 5—figure supplement 1—source data 3. [file elife-69802-fig5-figsupp1-data3.xlsx]

## Sheet: 210816 StainFree+Pan-acetyl
210816 ACE_I Pan-acetyl 50secQ					Pan-acetyl																			Pan-acetyl					Pan-acetyl (relative to mean Pre)
Lane	Volume (Int)	Adj. Vol. (Int)	Mean Bkgd. (Int)	# of Pixels	Min. Value (Int)	Max. Value (Int)	Mean Value (Int)	Std. Dev.	Area (mm2)		Sample	Input (uL)												PRE	POST	RATIO				PRE	POST
1	37648107	1.4909e+07	947.185	24007	46	16124	1568.21	1349.17	232.541		Ctrl	8	1.11793										1	1.18521	2.11532	1.78476			1	0.709312	1.26595
2	43905918	1.58063e+07	1153.7	24356	65	10709	1802.67	1316.9	235.921		1.A	8	1.18521										2	2.48874	3.17013	1.27379			2	1.48944	1.89722
3	60173878	2.82105e+07	1347.08	23728	170	24477	2535.99	2439.53	229.838		1.B	8	2.11532										3	1.4666	2.01791	1.37591			3	0.877717	1.20766
4	70226748	3.31906e+07	1569.86	23592	190	35739	2976.72	3262.5	228.521		2.A	8	2.48874										4						4
5	81334548	4.22777e+07	1650.96	23657	59	54831	3438.08	4373.09	229.151		2.B	8	3.17013										5	1.03745	1.48883	1.43508			5	0.620883	0.891019
6	53385569	1.9559e+07	1447.06	23376	79	22813	2283.78	2031.94	226.429		3.A	8	1.4666										6	1.58442	2.39128	1.50925			6	0.948228	1.43111
7	56810917	2.69114e+07	1293.01	23124	60	27204	2456.79	2596.45	223.988		3.B	8	2.01791										7	2.40856	2.20385	0.915007			7	1.44145	1.31894
8	58215616	2.96336e+07	1219.89	23430	133	33513	2484.66	2844.38	226.952		4.A	8	2.22203										8	1.52551	1.79613	1.17739			8	0.912973	1.07493
9	35635792	1.08727e+07	1051.69	23546	83	13511	1513.45	1261.9	228.075		Ctrl	8	0.815271										Mean	1.67093	2.16906	1.35303			Mean	1	1.29812
10	34750901	1.41994e+07	901.62	22794	95	15479	1524.56	1394.11	220.791		Ctrl	8	1.06472										SD	0.565762	0.52919	0.27296			SD	0.338591	0.316704
11	36146642	1.38357e+07	957.714	23296	68	9508	1551.62	1228.44	225.654		5.A	8	1.03745										TTEST		0.0133276				TTEST		0.0133276
12	45939584	1.98555e+07	1114.47	23405	60	20770	1962.81	1925.2	226.71		5.B	8	1.48883
13	51610290	2.11303e+07	1292.29	23586	68	27561	2188.17	2306.94	228.463		6.A	8	1.58442
14	64698091	3.18908e+07	1436.58	22837	97	40590	2833.04	3648.29	221.208		6.B	8	2.39128
15	67274516	3.21212e+07	1559.66	22539	120	47648	2984.8	4021.95	218.321		7.A	8	2.40856
16	66976289	2.93912e+07	1587.95	23669	114	39956	2829.71	3449.7	229.267		7.B	8	2.20385
17	54349772	2.03447e+07	1440.34	23609	103	26699	2302.08	2401.41	228.686		8.A	8	1.52551
18	51287543	2.39537e+07	1148.67	23796	35	20874	2155.3	2199.23	230.497		8.B	8	1.79613
19	34925152	1.3364e+07	896.96	24038	58	13940	1452.91	1352.95	232.841		Ctrl	8	1.00208
20	19810421	1.60306e+06	812.72	22403	40	4380	884.275	505.165	217.004		Ctrl	4	1.33363e+07
21	56128948	3.21529e+07	869.423	27577	33	23289	2035.35	2053.82	267.121		Ctrl	16
22	16427550	-1.47283e+06	783.901	22835	29	3546	719.402	311.347	221.188		Ctrl	2
23	41735227	2.17792e+07	697.371	28616	3	13577	1458.46	1371.2	277.185		Ctrl	12
