# Supplementary material for: High-intensity interval training remodels the proteome and acetylome of human skeletal muscle
Source: eLife. 2022 May 31;11:e69802. doi: 10.7554/eLife.69802 (PMC9154743; doi:10.7554/eLife.69802)
Supplement: Figure 5—figure supplement 1—source data 6. [file elife-69802-fig5-figsupp1-data6.xlsx]

## Sheet: 210816 StainFree+Pan-acetyl
220407 ACE_O SOD2-K68 #403 100secQ					SOD2 K68																			SOD2 K68					Pan-acetyl (relative to mean Pre)
Lane	Volume (Int)	Adj. Vol. (Int)	Mean Bkgd. (Int)	# of Pixels	Min. Value (Int)	Max. Value (Int)	Mean Value (Int)	Std. Dev.	Area (mm2)		Sample	Input (uL)												PRE	POST	RATIO				PRE	POST
1	12613380	7570647	5717	882	2208	35124	14301	8251	9		Ctrl	8	1.12897										1	0.103068	0.780237	7.57014			1	0.163126	1.23489
2	3448232	691153	2854	966	1560	6272	3570	861	10		1.A	6	0.103068										2	0.587742	1.02122	1.73753			2	0.930226	1.61629
3	12548728	5232128	7558	968	4004	23088	12964	3673	10		1.B	6	0.780237										3	0.589299	0.585804	0.994068			3	0.932691	0.927158
4	10098976	3941297	7160	860	3924	20520	11743	3893	9		2.A	6	0.587742										4	0.536491	2.23881	4.17306			4	0.849111	3.5434
5	15048032	6848104	8103	1012	3804	28588	14870	5801	11		2.B	6	1.02122										5	0.239754	0.532024	2.21904			5	0.379461	0.84204
6	10048612	3951737	6025	1012	3456	17080	9929	3134	11		3.A	6	0.589299										6	0.797385	1.46219	1.83373			6	1.26203	2.31422
7	10403700	3928297	6262	1034	3632	17096	10062	2779	11		3.B	6	0.585804										7	1.01656	1.15373	1.13494			7	1.60891	1.82602
8	11033272	3597617	6355	1170	3596	15284	9430	2410	12		4.A	6	0.536491										8	1.18432	0.783308	0.661397			8	1.87444	1.23975
9	29061476	15013088	9756	1440	4388	39988	20182	9095	15		4.B	6	2.23881										Mean	0.631827	1.06966	2.54049			Mean	1	1.69297
10	12151756	6512386	6408	880	3548	29140	13809	6184	9		Ctrl	8	0.971154										SD	0.363873	0.563071	2.30243			SD	0.575906	0.891179
11	5269664	1607748	3783	968	2328	8872	5444	1391	10		5.A	6	0.239754										TTEST		0.0872161				TTEST		0.0872161
12	8520412	3567657	5003	990	2984	15856	8606	2822	10		5.B	6	0.532024
13	11931656	5347121	6802	968	3768	21920	12326	4328	10		6.A	6	0.797385
14	20581296	9805176	8367	1288	4080	32136	15979	6475	14		6.B	6	1.46219
15	16171308	6816841	9064	1032	6316	28924	15670	5257	11		7.A	6	1.01656
16	18277116	7736689	9166	1150	5660	30000	15893	5501	12		7.B	6	1.15373
17	17872572	7941861	8303	1196	4060	27176	14944	5504	13		8.A	6	1.18432
18	12536892	5252724	6738	1081	3892	20716	11597	3900	11		8.B	6	0.783308
19	11669212	6034436	5833	966	3460	26732	12080	5476	10		Ctrl	8	0.89988
20	5888996	1931764	4650	851	2824	13080	6920	2317	9		Ctrl	4	6705823
21	27227692	13471102	9883	1392	3840	54692	19560	11126	15		Ctrl	12
22	34045972	18877952	8839	1716	2520	53632	19840	12393	18		Ctrl	16
