# Supplementary material for: High-intensity interval training remodels the proteome and acetylome of human skeletal muscle
Source: eLife. 2022 May 31;11:e69802. doi: 10.7554/eLife.69802 (PMC9154743; doi:10.7554/eLife.69802)
Supplement: Figure 5—figure supplement 1—source data 9. [file elife-69802-fig5-figsupp1-data9.xlsx]

## Sheet: 210816 StainFree+Pan-acetyl
220407 ACE_O SOD2-K122 #404 100secQ					SOD2 K122																			SOD2 K122					Pan-acetyl (relative to mean Pre)
Lane	Volume (Int)	Adj. Vol. (Int)	Mean Bkgd. (Int)	# of Pixels	Min. Value (Int)	Max. Value (Int)	Mean Value (Int)	Std. Dev.	Area (mm2)		Sample	Input (uL)												PRE	POST	RATIO				PRE	POST
1	16368056	11483978	3683	1326	1380	45340	12344	10729	14		Ctrl	16	1.083										1						1
2	2574100	451100	2010	1056	476	5172	2438	817	11		Ctrl	12	0.0425413										2	0.269718	0.480125	1.7801			2	0.821631	1.46259
3	12205648	8211253	3288	1215	1584	36132	10046	8374	13		Ctrl	16	0.774368										3	0.220041	0.343656	1.56178			3	0.670303	1.04686
4	6222756	2860040	3481	966	1972	15232	6442	3139	10		2.A	12	0.269718										4	0.229655	1.03646	4.51314			4	0.699587	3.15733
5	8901340	5091160	3849	990	2076	24772	8991	5324	10		2.B	12	0.480125										5	0.155361	0.246296	1.58531			5	0.47327	0.750281
6	4621672	2333278	2534	903	1152	13412	5118	2690	10		3.A	12	0.220041										6	0.314797	0.583529	1.85367			6	0.958954	1.77758
7	6914172	3644063	3097	1056	1280	16376	6548	3504	11		3.B	12	0.343656										7	0.531041	0.645505	1.21555			7	1.61769	1.96637
8	5828016	2435214	3427	990	1712	15080	5887	2789	10		4.A	12	0.229655										8	0.577287	0.489453	0.847851			8	1.75857	1.491
9	18800044	10990452	6930	1127	3248	43272	16681	9471	12		4.B	12	1.03646										Mean	0.328272	0.546432	1.9082			Mean	1	1.66457
10	14472460	9574973	4638	1056	1812	41168	13705	10097	11		Ctrl	16	0.902975										SD	0.162312	0.255005	1.19954			SD	0.494445	0.77681
11	4076708	1647421	2296	1058	864	9404	3853	1784	11		5.A	12	0.155361										TTEST		0.0870074				TTEST		0.0870074
12	5215404	2611675	2630	990	1200	12616	5268	2675	10		5.B	12	0.246296
13	6782004	3338051	3489	987	1508	16632	6871	3399	10		6.A	12	0.314797
14	11348864	6187630	4775	1081	2340	26292	10498	5872	11		6.B	12	0.583529
15	10712268	5631058	4700	1081	3316	24036	9910	5176	11		7.A	12	0.531041
16	12873968	6844812	5359	1125	2900	29008	11444	6161	12		7.B	12	0.645505
17	11870248	6121443	5681	1012	3540	29116	11729	5567	11		8.A	12	0.577287
18	10895640	5190072	4755	1200	2768	22480	9080	4652	13		8.B	12	0.489453
19	16229616	10752482	4482	1222	1844	41092	13281	9970	13		Ctrl	16	1.01402
20	7138964	3568502	4057	880	2756	18944	8112	4259	9		Ctrl	8	10603811
21	20716976	13211343	5774	1300	2956	51532	15936	11980	14		Ctrl	20
22	24976764	16410687	5371	1595	1992	62176	15659	12844	17		Ctrl	24
