# Supplementary material for: High-intensity interval training remodels the proteome and acetylome of human skeletal muscle
Source: eLife. 2022 May 31;11:e69802. doi: 10.7554/eLife.69802 (PMC9154743; doi:10.7554/eLife.69802)
Supplement: Figure 5—source data 3. [file elife-69802-fig5-data3.xlsx]

## Sheet: SIRT1
201001 ACE_F SIRT1 07-131 25secQ					SIRT1																				SIRT1					SIRT1 (relative to mean Pre)
Lane	Volume (Int)	Adj. Vol. (Int)	Mean Bkgd. (Int)	# of Pixels	Min. Value (Int)	Max. Value (Int)	Mean Value (Int)	Std. Dev.	Area (mm2)		Sample	Input (uL)													PRE	POST	RATIO				PRE	POST
1	6449420	4.26292e+06	1987.73	1100	372	23024	5863.11	4892.38	10.655		Ctrl	20	1.13572											1	4.42563	1.35975	0.307245			1	3.68811	1.13315
2	20556028	16611535	2667	1479	940	63360	13898.6	15772.1	14.3262		1.A	20	4.42563											2	0.801878	1.03233	1.28739			2	0.668248	0.860297
3	7353704	5.10381e+06	1956.43	1150	344	22248	6394.53	5334.23	11.1393		1.B	20	1.35975											3	0.911182	1.52561	1.67432			3	0.759336	1.27137
4	4216976	3.00984e+06	1381.16	874	400	16232	4824.92	3899.09	8.46589		2.A	20	0.801878											4	0.386558	0.311702	0.806352			4	0.322139	0.259758
5	5137612	3.87484e+06	1336.26	945	136	18704	5436.63	4682.72	9.15362		2.B	20	1.03233											5	1.14081	0.550187	0.482276			5	0.950699	0.4585
6	4644460	3.42011e+06	1498.59	817	696	17328	5684.77	4609.18	7.91377		3.A	20	0.911182											6	0.625233	0.572942	0.916366			6	0.52104	0.477463
7	7269408	5.72636e+06	1315.47	1173	220	20420	6197.28	5225.95	11.3621		3.B	20	1.52561											7	0.586151	1.30044	2.21861			7	0.488471	1.08373
8	2284080	1.45094e+06	905.588	920	0	6760	2482.7	1535.91	8.91147		4.A	20	0.386558											8	0.722331	1.15574	1.60002			8	0.601957	0.963143
9	1857812	1.06361e+06	844.899	940	0	5084	1976.4	1088.19	9.10519		4.B	18	0.311702											Mean	1.19997	0.976089	1.16157			Mean	1	0.813427
10	4342184	3.23021e+06	1074.37	1035	0	14444	4195.35	3432.71	10.0254		Ctrl	20	0.860589											SD	1.32272	0.443226	0.650927			SD	1.10229	0.369364
11	5411548	4.28202e+06	1044.89	1081	288	17364	5006.06	4450.78	10.471		5.A	20	1.14081											TTEST		0.620809				TTEST		0.620809
12	3105684	2.06512e+06	983.521	1058	60	9264	2935.43	2116.81	10.2482		5.B	20	0.550187
13	3437648	2346804	988.083	1104	48	11140	3113.81	2566.36	10.6938		6.A	20	0.625233
14	3200964	2.15053e+06	1061.04	990	32	10116	3233.3	2395.31	9.58951		6.B	20	0.572942
15	3417004	2.20011e+06	1152.36	1056	444	10648	3235.8	2338.92	10.2288		7.A	20	0.586151
16	6562680	4.8812e+06	1401.24	1200	148	18596	5468.9	4635.1	11.6237		7.B	20	1.30044
17	4140632	2.71126e+06	1448.2	987	384	12692	4195.17	3062.89	9.56045		8.A	20	0.722331
18	5817788	4.33807e+06	1311.81	1128	340	17164	5157.61	4523.55	10.9262		8.B	20	1.15574
19	5203228	3767332	1332	1078	352	15124	4826.74	3877.64	10.4419		Ctrl	20	1.00369
20	1976628	967976	1230.06	820	0	6400	2410.52	1315.41	7.94283		Ctrl	5	3.75349e+06
21	6442836	4.81963e+06	1252.47	1296	92	17068	4971.32	4235.78	12.5535		Ctrl	30
22	2824936	1.76874e+06	1143.07	924	272	9128	3057.29	2149.03	8.95021		Ctrl	6
