# Supplementary material for: High-intensity interval training remodels the proteome and acetylome of human skeletal muscle
Source: eLife. 2022 May 31;11:e69802. doi: 10.7554/eLife.69802 (PMC9154743; doi:10.7554/eLife.69802)
Supplement: Figure 5—source data 6. [file elife-69802-fig5-data6.xlsx]

## Sheet: SIRT3
200924 ACE_E SIRT-3 #394 210secQ					SIRT3																				SIRT3					SIRT3 (relative to mean Pre)
Lane	Volume (Int)	Adj. Vol. (Int)	Mean Bkgd. (Int)	# of Pixels	Min. Value (Int)	Max. Value (Int)	Mean Value (Int)	Std. Dev.	Area (mm2)		Sample	Input (uL)													PRE	POST	RATIO				PRE	POST
1	19199944	1.23789e+07	5800.22	1176	1908	33216	16326.5	8917.09	12.4108		Ctrl	20	1.02502											1	0.667819	1.48131	2.21813			1	0.980333	2.17451
2	15325940	8.06508e+06	7203.24	1008	2728	29988	15204.3	6748.34	10.6378		1.A	20	0.667819											2	0.964564	1.46983	1.52382			2	1.41594	2.15765
3	30238340	17889385	11487.4	1075	4420	57228	28128.7	12290	11.3449		1.B	20	1.48131											3	0.830677	1.00024	1.20413			3	1.2194	1.46831
4	20793928	1.16488e+07	8861.57	1032	3824	45200	20149.2	9316.28	10.8911		2.A	20	0.964564											4	0.555072	1.22566	2.20811			4	0.814825	1.79923
5	28818264	1.77507e+07	9997.8	1107	3124	53836	26032.8	14081.8	11.6826		2.B	20	1.46983											5	0.201812	0.545859	2.70479			5	0.296252	0.801301
6	18086892	10031868	8186	984	2124	43136	18381	9512.98	10.3846		3.A	20	0.830677											6	0.671116	1.30735	1.94803			6	0.985172	1.91914
7	21243020	1.20796e+07	8484.62	1080	2984	41156	19669.5	9031.92	11.3977		3.B	20	1.00024											7	0.541177	0.654865	1.21007			7	0.794428	0.961317
8	12888988	6.70346e+06	6254.32	989	2712	33760	13032.3	6727.46	10.4373		4.A	20	0.555072											8	1.01749	1.08832	1.0696			8	1.49364	1.59761
9	23504088	1.4802e+07	9008.36	966	3196	55244	24331.4	13331.8	10.1946		4.B	20	1.22566											Mean	0.681217	1.09668	1.76084			Mean	1	1.60988
10	19009376	1.16224e+07	8029.29	920	2292	42428	20662.4	10031.6	9.70915		Ctrl	20	0.962381											SD	0.262227	0.349729	0.595521			SD	0.384939	0.513389
11	5300184	2.43723e+06	3111.91	920	1660	10840	5761.07	2007.32	9.70915		5.A	20	0.201812											TTEST		0.00418634				TTEST		0.00418634
12	11674948	6.5922e+06	5261.64	966	1932	26640	12085.9	5608.43	10.1946		5.B	20	0.545859
13	14014016	8.10489e+06	6551.14	902	2056	34828	15536.6	7715.13	9.51919		6.A	20	0.671116
14	24205616	1.57886e+07	7829.83	1075	2484	47068	22516.9	11366.9	11.3449		6.B	20	1.30735
15	11733188	6.53566e+06	4950.03	1050	1960	27360	11174.5	5310.1	11.0811		7.A	20	0.541177
16	13915880	7908630	5339.78	1125	1800	29848	12369.7	6341.33	11.8726		7.B	20	0.654865
17	19020544	1.2288e+07	6523.77	1032	2480	45580	18430.8	10335.9	10.8911		8.A	20	1.01749
18	20131428	1.31433e+07	6988.12	1000	2764	43128	20131.4	10351.8	10.5534		8.B	20	1.08832
19	18343536	1.22289e+07	5112.57	1196	1900	42640	15337.4	8957.12	12.6219		Ctrl	20	1.0126
20	2012864	477607	1886.07	814	880	4864	2472.81	732.145	8.59048		Ctrl	5	1.20767e+07
21	19513004	1.35269e+07	4788.88	1250	1184	47600	15610.4	9721.74	13.1918		Ctrl
22	2495980	1.26413e+06	1365.69	902	240	8284	2767.16	1873.23	9.51919		Ctrl
23	5050356	3040964	1985.57	1012	0	14324	4990.47	2833.44	10.6801		Ctrl	10
24	17649152	1.19199e+07	4320.73	1326	1072	31820	13310.1	7323.49	13.9938		Ctrl	25
