# Supplementary material for: High-intensity interval training remodels the proteome and acetylome of human skeletal muscle
Source: eLife. 2022 May 31;11:e69802. doi: 10.7554/eLife.69802 (PMC9154743; doi:10.7554/eLife.69802)
Supplement: Figure 5—source data 9. [file elife-69802-fig5-data9.xlsx]

## Sheet: SIRT5
200924 ACE_E SIRT-5 #395 100secQ					SIRT5																		SIRT5					SIRT5 (relative to mean Pre)
Lane	Volume (Int)	Adj. Vol. (Int)	Mean Bkgd. (Int)	# of Pixels	Min. Value (Int)	Max. Value (Int)	Mean Value (Int)	Std. Dev.	Area (mm2)		Sample	Input (uL)											PRE	POST	RATIO				PRE	POST
1	15799424	1.06074e+07	6831.61	760	2792	45940	20788.7	11510.2	8.0206		Ctrl	12	1.08891									1	0.680303	1.3808	2.02968			1	0.814444	1.65306
2	11129468	6.62706e+06	5229.28	861	2084	28468	12926.2	7085.02	9.0865		1.A	12	0.680303									2	1.20704	1.39127	1.15263			2	1.44505	1.6656
3	20910312	1.34508e+07	9108.03	819	3184	52592	25531.5	13768.9	8.64325		1.B	12	1.3808									3	1.01479	1.18495	1.16769			3	1.21488	1.4186
4	18489284	1.17582e+07	8413.84	800	2712	48440	23111.6	12241.4	8.44274		2.A	12	1.20704									4	0.732352	0.990001	1.35181			4	0.876755	1.18521
5	20851428	1.35528e+07	9603.41	760	3904	56892	27436.1	14584.5	8.0206		2.B	12	1.39127									5	0.378551	0.707607	1.86925			5	0.453192	0.847131
6	15701936	9.88537e+06	8503.76	684	4268	49760	22956	11240.4	7.21854		3.A	12	1.01479									6	0.812578	1.22198	1.50383			6	0.972801	1.46293
7	17697364	1.1543e+07	8305.47	741	3064	50716	23883.1	12637.7	7.82008		3.B	12	1.18495									7	0.735173	0.828837	1.1274			7	0.880133	0.992266
8	11177664	7.13408e+06	5479.11	738	1900	32296	15145.9	7862.11	7.78843		4.A	12	0.732352									8	1.1216	1.08704	0.96919			8	1.34275	1.30138
9	14929132	9.64393e+06	7528.78	702	3932	41648	21266.6	10478.2	7.4085		4.B	12	0.990001									Mean	0.835298	1.09906	1.39644			Mean	1	1.31577
10	13545376	8842116	5893.81	798	1896	36512	16974.2	9566.72	8.42163		Ctrl	12	0.907691									SD	0.268902	0.246561	0.378865			SD	0.321924	0.295178
11	6260088	3.68759e+06	2998.25	858	1228	14096	7296.14	3528.84	9.05484		5.A	12	0.378551									TTEST		0.0124215				TTEST		0.0124215
12	10526868	6893028	3932.73	924	1752	22736	11392.7	5526.59	9.75136		5.B	12	0.707607
13	12577804	7.91559e+06	5984.87	779	2408	32700	16146.1	8363.24	8.22111		6.A	12	0.812578
14	18083960	11903716	8131.9	760	3140	47784	23794.7	12213.5	8.0206		6.B	12	1.22198
15	10995272	7.16156e+06	4915.02	780	2060	29692	14096.5	7629.29	8.23167		7.A	12	0.735173
16	11928184	8.07398e+06	4700.25	820	2268	31424	14546.6	8127.29	8.65381		7.B	12	0.828837
17	15906088	1.09258e+07	6384.95	780	2808	46224	20392.4	11367.7	8.23167		8.A	12	1.1216
18	16207788	1.05892e+07	6877.09	817	2248	40916	19838.2	10862.4	8.62214		8.B	12	1.08704
19	14840320	9.77446e+06	6030.78	840	1868	41148	17667	10388.3	8.86487		Ctrl	12	1.0034
20	3061744	1.52245e+06	2591.4	594	800	11872	5154.45	2720.35	6.26873		Ctrl	4	9.74133e+06
21	24106772	1.6927e+07	7274.34	987	2284	53752	24424.3	13512.3	10.4162		Ctrl	18
22	9783996	6.54243e+06	3078.41	1053	768	24352	9291.54	6448.82	11.1128		Ctrl	8
23	19173636	1.45029e+07	4615.4	1012	1224	48028	18946.3	12344.7	10.6801		Ctrl	15
