# Supplementary material for: High-intensity interval training remodels the proteome and acetylome of human skeletal muscle
Source: eLife. 2022 May 31;11:e69802. doi: 10.7554/eLife.69802 (PMC9154743; doi:10.7554/eLife.69802)
Supplement: Figure 5—source data 12. [file elife-69802-fig5-data12.xlsx]

## Sheet: SIRT6
210811 ACE_H SIRT6 360secQ					SIRT6																			SIRT6					SIRT6 (relative to mean Pre)
Lane	Volume (Int)	Adj. Vol. (Int)	Mean Bkgd. (Int)	# of Pixels	Min. Value (Int)	Max. Value (Int)	Mean Value (Int)	Std. Dev.	Area (mm2)		Sample	Input (uL)												PRE	POST	RATIO				PRE	POST
1	17637804	7.65427e+06	2295.06	4350	384	15832	4054.67	2024.66	44.6323		Ctrl	16	0.985091										1	1.05042	1.11074	1.05742			1	1.28865	1.36265
2	19640964	8.1619e+06	2966.17	3870	1280	10816	5075.18	2002.62	39.7074		1.A	16	1.05042										2	0.63363	0.896008	1.41409			2	0.777333	1.09922
3	20578136	8.63058e+06	2990.63	3995	1340	12368	5150.97	2186.3	40.9899		1.B	16	1.11074										3	0.778337	1.04642	1.34443			3	0.954859	1.28374
4	14343724	4.92338e+06	2577.38	3655	952	8980	3924.41	1454.38	37.5014		2.A	16	0.63363										4	0.780968	1.0331	1.32284			4	0.958087	1.2674
5	17624056	6.96209e+06	2850.79	3740	860	11748	4712.31	1939.15	38.3736		2.B	16	0.896008										5	0.74188	0.985961	1.329			5	0.910133	1.20957
6	17113768	6.04777e+06	2994.05	3696	1252	10608	4630.35	1871.27	37.9221		3.A	16	0.778337										6	0.757747	0.949455	1.253			6	0.929599	1.16478
7	20590200	8.13078e+06	3257.36	3825	1220	11732	5383.06	2133.01	39.2457		3.B	16	1.04642										7	0.714105	0.943747	1.32158			7	0.876059	1.15778
8	18194396	6.06822e+06	3071.47	3948	1280	9568	4608.51	1591	40.5077		4.A	16	0.780968										8	1.06398	1.34379	1.26299			8	1.30528	1.64856
9	20972656	8.02731e+06	3240.39	3995	1012	11160	5249.73	2001.71	40.9899		4.B	16	1.0331										Mean	0.815133	1.03865	1.28817			Mean	1	1.27421
10	20211176	7.50338e+06	3283.67	3870	1500	10568	5222.53	1895.21	39.7074		Ctrl	16	0.965671										SD	0.156577	0.140655	0.105642			SD	0.192088	0.172554
11	17373824	5.76449e+06	3004.48	3864	912	9608	4496.33	1593.45	39.6458		5.A	16	0.74188										TTEST		4.7014e-05				TTEST		4.7014e-05
12	18725948	7.66103e+06	2892.79	3825	1184	10436	4895.67	1868.18	39.2457		5.B	16	0.985961
13	16219828	5.88779e+06	2642.47	3910	920	8884	4148.29	1553.1	40.1178		6.A	16	0.757747
14	18320108	7.37738e+06	2831.97	3864	1096	10152	4741.23	1826.97	39.6458		6.B	16	0.949455
15	16753724	5.54868e+06	2812.51	3984	1004	32620	4205.25	1418.96	40.8771		7.A	16	0.714105
16	19377588	7.33302e+06	3080.45	3910	1360	9764	4955.9	1747.99	40.1178		7.B	16	0.943747
17	21986204	8.26723e+06	3629.36	3780	1056	13056	5816.46	2498.43	38.784		8.A	16	1.06398
18	26027172	1.04414e+07	3935.79	3960	1412	15056	6572.52	2834.82	40.6308		8.B	16	1.34379
19	21217364	8.15271e+06	3195.07	4089	1208	16748	5188.89	1854.25	41.9544		Ctrl	16	1.04924
20	11949800	2.5257e+06	2609.11	3612	1040	7632	3308.36	1143.76	37.0602		Ctrl	8	7.77012e+06
21	29389816	1.28668e+07	3560.24	4641	1204	13092	6332.65	2504.11	47.6181		Ctrl	24
22	19617576	6.15684e+06	3402.61	3956	1316	10668	4958.94	1870.39	40.5898		Ctrl	12
23	24660092	9.99975e+06	3216.4	4558	1268	11420	5410.29	2156.43	46.7665		Ctrl	20
