# Supplementary material for: High-intensity interval training remodels the proteome and acetylome of human skeletal muscle
Source: eLife. 2022 May 31;11:e69802. doi: 10.7554/eLife.69802 (PMC9154743; doi:10.7554/eLife.69802)
Supplement: Figure 5—source data 15. [file elife-69802-fig5-data15.xlsx]

## Sheet: GCN5L1
211007 ACE_K GCN5L1 IS 12secQ2					GCN5L1																		GCN5L1					GCN5L1 (relative to mean Pre)
Lane	Volume (Int)	Adj. Vol. (Int)	Mean Bkgd. (Int)	# of Pixels	Min. Value (Int)	Max. Value (Int)	Mean Value (Int)	Std. Dev.	Area (mm2)		Sample	Input (uL)											PRE	POST	RATIO				PRE	POST
1	9360768	2.59808e+06	2084.03	3245	824	5504	2884.67	747.938	24.9262		Ctrl	18	1.0007									1	1.911	2.67099	1.39769			1	1.10671	1.54684
2	14732576	4.96145e+06	3061.13	3192	1496	9256	4615.47	1259.6	24.5191		1.A	20	1.911									2	1.86212	2.20758	1.18552			2	1.0784	1.27847
3	17621712	6934572	3665	2916	2212	10228	6043.11	1753.42	22.399		1.B	20	2.67099									3	1.76509	1.56157	0.884694			3	1.02221	0.904342
4	14952580	4.83454e+06	3469.84	2916	2112	11120	5127.77	1516.62	22.399		2.A	20	1.86212									4						4
5	16991392	5731459	4165.72	2703	2252	12416	6286.12	1907.56	20.7629		2.B	20	2.20758									5	1.49883	1.407	0.938734			5	0.868008	0.814829
6	15439908	4582635	4344.65	2499	2492	10608	6178.43	1628	19.1958		3.A	20	1.76509									6	1.87842	1.99789	1.0636			6	1.08784	1.15703
7	15377516	4.05423e+06	4031.07	2809	2068	9576	5474.37	1402.22	21.5771		3.B	20	1.56157									7	1.83838	1.3742	0.747507			7	1.06465	0.795833
8	13928468	4.99153e+06	3181.54	2809	1656	9828	4958.51	1689.44	21.5771		4.A	20	1.92259									8	1.33336	1.74354	1.30762			8	0.772185	1.00973
9	9583284	2608932	2635.81	2646	1396	6104	3621.8	814.106	20.325		Ctrl	18	1.00488									Mean	1.72674	1.85182	1.07505			Mean	1	1.07244
10	8927880	2.47635e+06	2254.2	2862	1324	5608	3119.45	736.711	21.9842		Ctrl	18	0.953817									SD	0.222076	0.47274	0.235452			SD	0.12861	0.273776
11	10588472	3891339	2297.47	2915	1092	6804	3632.41	1171.13	22.3913		5.A	20	1.49883									TTEST		0.455983				TTEST		0.455983
12	11776216	3.65293e+06	2740.65	2964	1644	6952	3973.08	1071.32	22.7677		5.B	20	1.407
13	14473020	4.87686e+06	3554.13	2700	2028	9556	5360.38	1575.24	20.7398		6.A	20	1.87842
14	16584356	5.18705e+06	4057.43	2809	2136	10060	5904.01	1694.6	21.5771		6.B	20	1.99789
15	15058784	4.7729e+06	3666.98	2805	1932	9548	5368.55	1519.53	21.5464		7.A	20	1.83838
16	12880716	3567776	3316.57	2808	1812	7688	4587.15	1021.38	21.5694		7.B	20	1.3742
17	12326372	3.46176e+06	3223.5	2750	1936	7440	4482.32	1045.74	21.1239		8.A	20	1.33336
18	13769460	4.52667e+06	3295.11	2805	1756	8368	4908.9	1322.04	21.5464		8.B	20	1.74354
19	10422292	2.70167e+06	2803.42	2754	1500	6488	3784.42	793.677	21.1546		Ctrl	18	1.0406
20	5617272	332072	2082.43	2538	868	3564	2213.27	406.813	19.4954		Ctrl	6	2.59626e+06
21	11952692	4.04959e+06	2790.64	2832	1516	8400	4220.58	1201.67	21.7538		Ctrl	24
22	6860444	1.97078e+06	1917.51	2550	624	5144	2690.37	766.648	19.5876		Ctrl	12
