# Supplementary material for: High-intensity interval training remodels the proteome and acetylome of human skeletal muscle
Source: eLife. 2022 May 31;11:e69802. doi: 10.7554/eLife.69802 (PMC9154743; doi:10.7554/eLife.69802)
Supplement: Figure 7—figure supplement 1—source data 3. [file elife-69802-fig7-figsupp1-data3.xlsx]

## Sheet: EP300
220131 ACE_L P300 SC-32244 #418 600secQ					EP300																				Non-normalized EP300					Non-normalized EP300 (relative to mean Pre)						Normalized EP300					Normalized EP300 (relative to mean Pre)
No.	Volume (Int)	Adj. Vol. (Int)	Mean Bkgd. (Int)	# of Pixels	Min. Value (Int)	Max. Value (Int)	Mean Value (Int)	Std. Dev.	Area (mm2)		Sample	Amount													PRE	POST	RATIO				PRE	POST				PRE	POST	RATIO				PRE	POST
1	9629264	1.53825e+06	8794.58	920	4764	14848	10466.6	1882.84	9.30608		HS CS KOM	12	0.891972											1	6.7246	3.16677	0.470924			1	3.73378	1.75832			1	7.55197	3.27551	0.433729			1	3.69978	1.6047
2	28666504	1.15969e+07	9578.92	1782	4604	39824	16086.7	7385.75	18.0255		1.A	12	6.7246											2	1.3918	2.0027	1.43893			2	0.772787	1.11199			2	1.40316	2.09695	1.49444			2	0.687422	1.02731
3	15853512	5.46124e+06	8189.34	1269	4136	29524	12492.9	4376.24	12.8363		1.B	12	3.16677											3	1.21075	1.02582	0.84726			3	0.672257	0.569577			3	1.19112	1.03908	0.872351			3	0.583541	0.509053
4	9284800	2.40022e+06	6519.49	1056	3256	16800	8792.42	2194.47	10.6818		2.A	12	1.3918											4	1.00171	1.02441	1.02266			4	0.556193	0.568794			4	1.10684	1.25128	1.1305			4	0.54225	0.613013
5	9778664	3453752	6534	968	3644	17648	10101.9	3242.21	9.79161		2.B	12	2.0027											5	1.30689	1.59341	1.21924			5	0.725642	0.88473			5	1.65246	1.91148	1.15675			5	0.809554	0.936449
6	8413640	2.08799e+06	6111.74	1035	3448	13104	8129.12	2098.27	10.4693		3.A	12	1.21075											6	0.859392	0.965263	1.12319			6	0.477171	0.535954			6	1.07738	1.12063	1.04014			6	0.52782	0.549006
7	7764008	1.76907e+06	5923.86	1012	3424	11940	7671.94	1702.22	10.2367		3.B	12	1.02582											7	0.923745	1.42925	1.54723			7	0.512902	0.79358			7	1.21132	1.64415	1.35732			7	0.593436	0.805484
8	6614424	1.7275e+06	5417.88	902	2864	11588	7333.06	1772.69	9.124		4.A	12	1.00171											8	0.98924	2.02324	2.04524			8	0.549268	1.12339			8	1.13531	2.40857	2.1215			8	0.5562	1.17998
9	6634528	1.76664e+06	4947.04	984	2960	13652	6742.41	1967.2	9.95346		4.B	12	1.02441											Mean	1.80102	1.65386	1.21433			Mean	1	0.918291			Mean	2.0412	1.84345	1.20084			Mean	1	0.903125
10	8726532	1.30079e+06	7687.1	966	3436	13608	9033.68	2172.01	9.77138		HS CS KOM	12	0.75428											SD	1.99842	0.743154	0.475717			SD	1.10961	0.412631			SD	2.23481	0.755825	0.490974			SD	1.09486	0.370285
11	7261140	2.2538e+06	5677.26	882	2696	16852	8232.59	2963.26	8.9217		5.A	12	1.30689
12	7863780	2.74791e+06	5413.62	945	2720	15732	8321.46	3002.88	9.55896		5.B	12	1.59341
13	5735204	1482060	4602.97	924	2544	48544	6206.93	1985.77	9.34654		6.A	12	0.859392
14	6198608	1.66464e+06	4683.85	968	2804	11168	6403.52	1667.54	9.79161		6.B	12	0.965263
15	5851000	1.59304e+06	4501.01	946	1976	12380	6184.99	1661.4	9.56907		7.A	12	0.923745
16	7426688	2.46481e+06	5125.91	968	2644	15260	7672.2	2411.83	9.79161		7.B	12	1.42925
17	6583912	1.70599e+06	5039.18	968	2764	13536	6801.56	1652.64	9.79161		8.A	12	0.98924
18	9724948	3.48916e+06	5307.05	1175	2620	20996	8276.55	3453.7	11.8855		8.B	12	2.02324
19	9633408	2.3346e+06	7240.88	1008	2940	14712	9556.95	3002.84	10.1962		HS CS KOM	12	1.35375
20	4070228	232890	4277.97	897	2192	6592	4537.6	778.854	9.07343		HS CS KOM	6	1.72454e+06
21	7067532	1.19346e+06	5675.43	1035	2596	15172	6828.53	1478.22	10.4693		HS CS KOM	15
22	7997648	1.20753e+06	5547.48	1224	2464	9800	6534.03	1502.89	12.3811		HS CS KOM	18
220208 ACE_N P300 #86377 #419 360secQ					Stain Free GEL																					Stain-free gel				Stain-free gel (relative to mean Pre)
Lane	Volume (Int)	Adj. Vol. (Int)	Mean Bkgd. (Int)	# of Pixels	Min. Value (Int)	Max. Value (Int)	Mean Value (Int)	Std. Dev.	Area (mm2)		Sample	Input (uL)													PRE	POST	RATIO				PRE	POST
1	149423360	1.04466e+08	2110.39	21303	680	34532	7014.19	5026.34	240.817		HS CS KOM	12	1.10341											1	0.890442	0.966804	1.08576			1	1.01384	1.10078
2	132900896	8.43029e+07	2266.59	21441	684	49544	6198.45	5516.24	242.377		1.A	12	0.890442											2	0.991902	0.955058	0.962855			2	1.12936	1.08741
3	137664232	9.15324e+07	2202.94	20941	712	35072	6573.91	5663.32	236.725		1.B	12	0.966804											3	1.01648	0.987239	0.971238			3	1.15733	1.12405
4	140533384	9.39086e+07	2292.49	20338	788	41932	6909.89	6339.54	229.908		2.A	12	0.991902											4	0.905022	0.818687	0.904605			4	1.03044	0.932138
5	136521692	9.04204e+07	2339.93	19702	816	38740	6929.33	6050.3	222.719		2.B	12	0.955058											5	0.790878	0.833603	1.05402			5	0.900476	0.949121
6	142714228	9.62351e+07	2324.42	19996	804	43148	7137.14	6397.38	226.042		3.A	12	1.01648											6	0.797666	0.861357	1.07985			6	0.908204	0.980721
7	141593420	9.34672e+07	2310.32	20831	796	45888	6797.25	5857.21	235.481		3.B	12	0.987239											7	0.762595	0.869294	1.13992			7	0.868272	0.989757
8	131167684	8.56832e+07	2225.05	20442	816	37316	6416.58	5595.94	231.084		4.A	12	0.905022											8	0.871337	0.840015	0.964053			8	0.992084	0.956421
9	125594880	7.75095e+07	2355.17	20417	840	38616	6151.49	5450.98	230.801		4.B	12	0.818687											Mean	0.87829	0.891507	1.02029			Mean	1	1.01505
10	135510756	8.52295e+07	2704.31	18593	860	29900	7288.27	4904.17	210.182		HS CS KOM	12	0.90023											SD	0.0929208	0.0671696	0.0806505			SD	0.105797	0.0764777
11	125925388	7.48767e+07	2464.69	20712	780	38004	6079.83	5201.27	234.136		5.A	12	0.790878
12	128355724	7.89217e+07	2347.41	21059	892	36028	6095.05	5036.4	238.059		5.B	12	0.833603
13	124308916	7.55193e+07	2390.95	20406	848	36980	6091.78	5255.99	230.677		6.A	12	0.797666
14	131926304	8.15493e+07	2473.95	20363	888	38984	6478.73	5571.28	230.191		6.B	12	0.861357
15	119504320	7.21989e+07	2386.51	19822	872	39552	6028.87	5427.6	224.075		7.A	12	0.762595
16	130283220	8.23006e+07	2307.3	20796	816	38100	6264.82	5479.17	235.086		7.B	12	0.869294
17	131658164	8.24941e+07	2364.91	20789	848	37796	6333.07	5468.45	235.006		8.A	12	0.871337
18	131266324	7.95287e+07	2474.66	20907	900	35548	6278.58	5225.02	236.34		8.B	12	0.840015
19	147737056	9.43307e+07	2666.18	20031	828	30176	7375.42	5002.91	226.438		HS CS KOM	12	0.99636
20	83836132	3.30052e+07	2774.46	18321	904	19680	4575.96	3043.6	207.107		HS CS KOM	6	9.46753e+07
21	178356744	1.10446e+08	3189.79	21290	1136	35328	8377.49	5571.45	240.67		HS CS KOM	15
22	211860876	1.37243e+08	3146.99	23711	1156	37524	8935.13	5939.32	268.038		HS CS KOM	18
