# Supplementary material for: High-intensity interval training remodels the proteome and acetylome of human skeletal muscle
Source: eLife. 2022 May 31;11:e69802. doi: 10.7554/eLife.69802 (PMC9154743; doi:10.7554/eLife.69802)
Supplement: Figure 7—source data 5. [file elife-69802-fig7-data5.xlsx]

## Sheet: Sheet2
H2B K20								H2B K20/H2B
Lane	Adj. Total Band Vol. (Int)	Total Band Vol. (Int)	Adj. Total Lane Vol. (Int)	Total Lane Vol. (Int)	Bkgd. Vol. (Int)	Sample					EP300 +	EP300 -
7	9638910	10266570	9769680	11395890	1626210	EP300+.1		1.88498			1.88498	1.11711
8	9584332	10227458	9758521	11424802	1666281	EP300+.2		1.99214			1.99214	0.839834
9	9152161	9804835	9293056	10984075	1691019	EP300+.3		1.68238			1.68238	0.950467
10	5280891	5927691	5410647	7254027	1843380	EP300-.1		1.11711
11	4681682	5277161	4818020	6604457	1786437	EP300-.2		0.839834		Mean	1.85317	0.969136
12	4423930	5073460	4564000	6620845	2056845	EP300-.3		0.950467		SD	0.157308	0.139577
										t.test		0.001891
H2B
Lane No.	Adj. Total Band Vol. (Int)	Total Band Vol. (Int)	Adj. Total Lane Vol. (Int)	Total Lane Vol. (Int)	Bkgd. Vol. (Int)	Sample
7	5111862	5443746	5182905	5865111	682206	EP300+.1
8	4826904	5205336	4898520	5676408	777888	EP300+.2
9	5425704	5808456	5523744	6310512	786768	EP300+.3
10	4758768	5108016	4843440	5603568	760128	EP300-.1
11	5663850	6058500	5736875	6548100	811225	EP300-.2
12	4725025	5096050	4801850	5609375	807525	EP300-.3
