# Supplementary material for: High-intensity interval training remodels the proteome and acetylome of human skeletal muscle
Source: eLife. 2022 May 31;11:e69802. doi: 10.7554/eLife.69802 (PMC9154743; doi:10.7554/eLife.69802)
Supplement: Figure 7—source data 10. [file elife-69802-fig7-data10.xlsx]

## Sheet: Sheet1
H3 K23								H2B K20/H2B
Lane No.	Adj. Total Band Vol. (Int)	Total Band Vol. (Int)	Adj. Total Lane Vol. (Int)	Total Lane Vol. (Int)	Bkgd. Vol. (Int)	Sample					EP300 +	EP300 -
7	2883864	3186600	2997912	3970992	973080	EP300+.1		0.39081			0.39081	0.431805
8	2835048	3143496	2923368	3914808	991440	EP300+.2		0.411979			0.411979	0.531306
9	1936770	2210890	1990010	2871110	881100	EP300+.3		0.320252			0.320252	0.896047
10	2106214	2376330	2145330	3013560	868230	EP300-.1		0.431805
11	2655576	2944788	2699818	3629428	929610	EP300-.2		0.531306		Mean	0.374347	0.619719
12	4530024	4947000	4615608	5719368	1103760	EP300-.3		0.896047		SD	0.0480286	0.244423
										t.test		0.163176
H3
Lane No.	Adj. Total Band Vol. (Int)	Total Band Vol. (Int)	Adj. Total Lane Vol. (Int)	Total Lane Vol. (Int)	Bkgd. Vol. (Int)	Sample
7	7589972	8533018	7671014	9065082	1394068	EP300+.1
8	7012392	7829904	7095912	8304408	1208496	EP300+.2
9	6126840	6904056	6213888	7415040	1201152	EP300+.3
10	4899048	5630352	4968288	6152304	1184016	EP300-.1
11	5007384	5742216	5081472	6271200	1189728	EP300-.2
12	5088267	5792481	5151080	6291236	1140156	EP300-.3
