# Supplementary material for: High-intensity interval training remodels the proteome and acetylome of human skeletal muscle
Source: eLife. 2022 May 31;11:e69802. doi: 10.7554/eLife.69802 (PMC9154743; doi:10.7554/eLife.69802)
Supplement: Figure 7—source data 14. [file elife-69802-fig7-data14.xlsx]

## Sheet: EP300
220131 ACE_L P300 SC-32244 #418 600secQ					EP300																				EP300					EP300 (relative to mean Pre)						EP300 (triplicate mean)					EP300 (triplicate mean; relative to mean Pre)
No.	Volume (Int)	Adj. Vol. (Int)	Mean Bkgd. (Int)	# of Pixels	Min. Value (Int)	Max. Value (Int)	Mean Value (Int)	Std. Dev.	Area (mm2)		Sample	Amount													PRE	POST	RATIO				PRE	POST				PRE	POST	RATIO				PRE	POST
1	9629264	1.53825e+06	8794.58	920	4764	14848	10466.6	1882.84	9.30608		HS CS KOM	12	0.891972											1	6.7246	3.16677	0.470924			1	3.73378	1.75832			1	4.94798	2.93013	0.592186			1	3.12718	1.89015
2	28666504	1.15969e+07	9578.92	1782	4604	39824	16086.7	7385.75	18.0255		1.A	12	6.7246											2	1.3918	2.0027	1.43893			2	0.772787	1.11199			2	1.12185	1.44121	1.28467			2	0.71635	0.908703
3	15853512	5.46124e+06	8189.34	1269	4136	29524	12492.9	4376.24	12.8363		1.B	12	3.16677											3	1.21075	1.02582	0.84726			3	0.672257	0.569577			3	0.927667	1.07056	1.15403			3	0.588603	0.697283
4	9284800	2.40022e+06	6519.49	1056	3256	16800	8792.42	2194.47	10.6818		2.A	12	1.3918											4	1.00171	1.02441	1.02266			4	0.556193	0.568794			4	0.825104	0.964287	1.16869			4	0.527483	0.622678
5	9778664	3453752	6534	968	3644	17648	10101.9	3242.21	9.79161		2.B	12	2.0027											5	1.30689	1.59341	1.21924			5	0.725642	0.88473			5	1.32369	1.26316	0.954267			5	0.860117	0.804066
6	8413640	2.08799e+06	6111.74	1035	3448	13104	8129.12	2098.27	10.4693		3.A	12	1.21075											6	0.859392	0.965263	1.12319			6	0.477171	0.535954			6	0.859083	1.25751	1.46378			6	0.557105	0.828521
7	7764008	1.76907e+06	5923.86	1012	3424	11940	7671.94	1702.22	10.2367		3.B	12	1.02582											7	0.923745	1.42925	1.54723			7	0.512902	0.79358			7	1.38517	1.69873	1.22637			7	0.921536	1.11508
8	6614424	1.7275e+06	5417.88	902	2864	11588	7333.06	1772.69	9.124		4.A	12	1.00171											8	0.98924	2.02324	2.04524			8	0.549268	1.12339			8	1.07537	1.5817	1.47084			8	0.701625	1.00514
9	6634528	1.76664e+06	4947.04	984	2960	13652	6742.41	1967.2	9.95346		4.B	12	1.02441											Mean	1.80102	1.65386	1.21433			Mean	1	0.918291			Mean	1.55824	1.52591	1.16435			Mean	1	0.983953
10	8726532	1.30079e+06	7687.1	966	3436	13608	9033.68	2172.01	9.77138		HS CS KOM	12	0.75428											SD	1.99842	0.743154	0.475717			SD	1.10961	0.412631			SD	1.38476	0.618272	0.286244			SD	0.870861	0.398875
11	7261140	2.2538e+06	5677.26	882	2696	16852	8232.59	2963.26	8.9217		5.A	12	1.30689																												t test		0.0136858
12	7863780	2.74791e+06	5413.62	945	2720	15732	8321.46	3002.88	9.55896		5.B	12	1.59341
13	5735204	1482060	4602.97	924	2544	48544	6206.93	1985.77	9.34654		6.A	12	0.859392
14	6198608	1.66464e+06	4683.85	968	2804	11168	6403.52	1667.54	9.79161		6.B	12	0.965263
15	5851000	1.59304e+06	4501.01	946	1976	12380	6184.99	1661.4	9.56907		7.A	12	0.923745
16	7426688	2.46481e+06	5125.91	968	2644	15260	7672.2	2411.83	9.79161		7.B	12	1.42925
17	6583912	1.70599e+06	5039.18	968	2764	13536	6801.56	1652.64	9.79161		8.A	12	0.98924
18	9724948	3.48916e+06	5307.05	1175	2620	20996	8276.55	3453.7	11.8855		8.B	12	2.02324
19	9633408	2.3346e+06	7240.88	1008	2940	14712	9556.95	3002.84	10.1962		HS CS KOM	12	1.35375
20	4070228	232890	4277.97	897	2192	6592	4537.6	778.854	9.07343		HS CS KOM	6	1.72454e+06
21	7067532	1.19346e+06	5675.43	1035	2596	15172	6828.53	1478.22	10.4693		HS CS KOM	15
22	7997648	1.20753e+06	5547.48	1224	2464	9800	6534.03	1502.89	12.3811		HS CS KOM	18
220208 ACE_N P300 #86377 #419 360secQ																									EP300					EP300 (relative to mean Pre)
Lane	Volume (Int)	Adj. Vol. (Int)	Mean Bkgd. (Int)	# of Pixels	Min. Value (Int)	Max. Value (Int)	Mean Value (Int)	Std. Dev.	Area (mm2)		Sample	Input (uL)													PRE	POST	RATIO				PRE	POST
1	7236108	1495632	6212.64	924	2848	11564	7831.29	1549.92	9.08134		HS CS KOM	12	0.819025											1	3.74987	2.63115	0.701663			1	2.6303	1.84559
2	14297412	6.84769e+06	5847.51	1274	2584	37208	11222.5	6045.15	12.5212		1.A	12	3.74987											2	1.21786	1.04495	0.858021			2	0.854249	0.732964
3	9765044	4.80477e+06	4697.23	1056	1576	24092	9247.2	4667.65	10.3787		1.B	12	2.63115											3	0.717068	1.17542	1.6392			3	0.502978	0.824482
4	5034676	2.22394e+06	2974.32	945	1104	12100	5327.7	2303.4	9.28773		2.A	12	1.21786											4	0.793888	0.822129	1.03557			4	0.556863	0.576672
5	4670488	1.90819e+06	2790.2	990	1468	13072	4717.66	2193.52	9.73		2.B	12	1.04495											5	1.37029	1.00565	0.733897			5	0.961171	0.705401
6	4115000	1.30945e+06	2772.29	1012	752	9700	4066.21	1557.31	9.94623		3.A	12	0.717068											6	0.721183	1.01005	1.40055			6	0.505865	0.708489
7	5040168	2.14645e+06	2989.38	968	1356	10484	5206.79	2136.08	9.51378		3.B	12	1.17542											7	1.83424	1.78305	0.972092			7	1.2866	1.2507
8	3995864	1.44973e+06	2694.32	945	808	7940	4228.43	1599.79	9.28773		4.A	12	0.793888											8	1.00076	1.14139	1.14052			8	0.701971	0.800613
9	5006744	1.5013e+06	2930.97	1196	1256	11936	4186.24	1766.46	11.7546		4.B	12	0.822129											Mean	1.42564	1.32672	1.06019			Mean	1	0.930613
10	8264708	1794068	6393.91	1012	2556	13032	8166.71	2322.16	9.94623		HS CS KOM	12	0.982452											SD	1.01371	0.598137	0.325532			SD	0.711052	0.419556
11	5614420	2.5023e+06	3704.91	840	1392	13864	6683.83	3007.19	8.25576		5.A	12	1.37029
12	4492736	1.83643e+06	2744.12	968	1456	14124	4641.26	1817.2	9.51378		5.B	12	1.00565
13	3827908	1.31696e+06	2373.3	1058	824	8392	3618.06	1350.45	10.3983		6.A	12	0.721183
14	4530812	1.84447e+06	2775.15	968	1256	9084	4680.59	1780	9.51378		6.B	12	1.01005
15	6714964	3.34952e+06	3186.97	1056	1556	15712	6358.87	3235.06	10.3787		7.A	12	1.83424
16	7163944	3.25604e+06	3216.38	1215	1544	16808	5896.25	2756.69	11.9414		7.B	12	1.78305
17	5064608	1.8275e+06	3344.12	968	1784	11692	5232.03	1924.79	9.51378		8.A	12	1.00076
18	5541820	2.08431e+06	3267.97	1058	1304	10296	5238.02	1838.57	10.3983		8.B	12	1.14139
19	9556708	2.18864e+06	7627.4	966	2272	14600	9893.07	2543.54	9.49413		HS CS KOM	12	1.19852
20	6290716	721180	5355.32	1040	3072	9068	6048.77	932.516	10.2214		HS CS KOM	6	1.82611e+06
21	14976772	3.87982e+06	7358.72	1508	2532	17164	9931.55	3521.74	14.8211		HS CS KOM	15
																									EP300					EP300 (relative to mean Pre)
Lane	Volume (Int)	Adj. Vol. (Int)	Mean Bkgd. (Int)	# of Pixels	Min. Value (Int)	Max. Value (Int)	Mean Value (Int)	Std. Dev.	Area (mm2)		Sample	Input (uL)													PRE	POST	RATIO				PRE	POST
22	5165860	866592	3655.84	1176	740	8400	4392.74	1129.67	11.5581		HS T2DM	12	0.822023											1	4.36948	2.99246	0.684855			1	3.01747	2.06653
23	9988752	4.60639e+06	4672.19	1152	2496	22996	8670.79	4021.18	11.3222		1.A	12	4.36948											2	0.755908	1.27598	1.68801			2	0.522013	0.881161
24	6827608	3154708	3710	990	1236	17008	6896.57	3243.58	9.73		1.B	12	2.99246											3	0.855187	1.01044	1.18155			3	0.590573	0.69779
25	3210908	796892	2385.39	1012	884	5668	3172.83	858.457	9.94623		2.A	12	0.755908											4	0.67971	1.04632	1.53937			4	0.469392	0.722568
26	4046908	1.34516e+06	2499.31	1081	644	8104	3743.67	1292.51	10.6244		2.B	12	1.27598											5	1.2939	1.19041	0.920015			5	0.893537	0.822067
27	3360160	901554	2539.88	968	636	6492	3471.24	1103.44	9.51378		3.A	12	0.855187											6	0.996673	1.79722	1.80322			6	0.68828	1.24112
28	3476456	1.06523e+06	2548.87	946	772	6648	3674.9	1083.34	9.29756		3.B	12	1.01044											7	1.39753	1.88389	1.34801			7	0.965104	1.30097
29	2947908	716563	2253.88	990	584	12864	2977.68	921.513	9.73		4.A	12	0.67971											8	1.23612	1.58047	1.27857			8	0.853635	1.09144
30	3275172	1.10305e+06	2194.06	990	612	8052	3308.25	1282.44	9.73		4.B	12	1.04632											Mean	1.44806	1.59715	1.30545			Mean	1	1.10296
31	3809184	1172592	2853.45	924	1188	7972	4122.49	1294.4	9.08134		HS T2DM	12	1.11229											SD	1.20893	0.653086	0.378045			SD	0.834862	0.451006
32	3676320	1364052	2502.45	924	1236	7516	3978.7	1386.55	9.08134		5.A	12	1.2939
33	3804924	1254948	2519.74	1012	864	6864	3759.81	1147.09	9.94623		5.B	12	1.19041
34	3458624	1.05071e+06	2326.49	1035	980	7088	3341.67	1063.56	10.1723		6.A	12	0.996673
35	4561440	1894664	2886.12	924	1608	8984	4936.62	1681.2	9.08134		6.B	12	1.79722
36	4282544	1473304	3040.3	924	924	9436	4634.79	1667.72	9.08134		7.A	12	1.39753
37	4871928	1.98603e+06	2915.04	990	1104	9992	4921.14	1817.79	9.73		7.B	12	1.88389
38	4303544	1.30314e+06	2964.83	1012	1212	8860	4252.51	1399.47	9.94623		8.A	12	1.23612
39	4464616	1.66616e+06	2826.72	990	1212	9208	4509.71	1643.67	9.73		8.B	12	1.58047
40	3770072	1123472	2673.33	990	1060	7748	3808.15	1134.12	9.73		HS T2DM	12	1.06569
41	2446256	338982	2389.2	882	1308	4916	2773.53	629.172	8.66855		HS T2DM	6	1.05422e+06
42	5658732	1.69414e+06	4004.64	990	1544	9420	5715.89	1429.65	9.73		HS T2DM	15
43	6774992	1.97986e+06	3914.39	1225	2120	10408	5530.61	1490.91	12.0397		HS T2DM	18
