# Supplementary material for: High-intensity interval training remodels the proteome and acetylome of human skeletal muscle
Source: eLife. 2022 May 31;11:e69802. doi: 10.7554/eLife.69802 (PMC9154743; doi:10.7554/eLife.69802)
Supplement: Supplementary file 1. [file elife-69802-supp1.xlsx]

## Sheet: Supp_File1_Proteome_Identified
ProteinAccessions	Genes	ProteinDescriptions	Pre_1	Pre_2	Pre_3	Pre_4	Pre_5	Pre_6	Pre_7	Pre_8	Post_1	Post_2	Post_3	Post_4	Post_5	Post_6	Post_7	Post_8
H3BRQ4;K4DIB9;P50238	;;CRIP1	Uncharacterized protein (Fragment);Isoform of H3BRQ4, Uncharacterized protein (Fragment);Cysteine-rich protein 1	NaN	5829.22	30620.6	25416.1	39167.5	17311.1	22043.4	5592.99	11652.8	17497.8	14130.9	32749	17917.1	34471.3	21101.1	9612.24		ProteinAccessions	UniProtKB Accession Numbers
A0A087WZ62;Q9H6U8;Q9H6U8-3	;ALG9;ALG9	Mannosyltransferase;Alpha-1,2-mannosyltransferase ALG9;Isoform of Q9H6U8, Isoform 3 of Alpha-1,2-mannosyltransferase ALG9	7299.33	NaN	3580.85	1484.52	3850.91	3141.53	3039.4	2851.25	3386.52	11442.7	7230.1	2465.48	3516.92	3470.41	3374.06	8610.97		Genes	Gene name
F5H5P2;P12694;P12694-2	;BCKDHA;BCKDHA	Uncharacterized protein;2-oxoisovalerate dehydrogenase subunit alpha, mitochondrial;Isoform of P12694, Isoform 2 of 2-oxoisovalerate dehydrogenase subunit alpha, mitochondrial	15094.4	20688.3	25422.7	7128.48	15053.5	29121.1	18567.9	19687.7	20571.2	26804.3	22703.4	19540	21523.8	21517.6	20180.5	22050.9		ProteinDescriptions	Protein names
H0YIV9;O43716	;GATC	Uncharacterized protein (Fragment);Glutamyl-tRNA(Gln) amidotransferase subunit C, mitochondrial	NaN	32323.6	NaN	NaN	NaN	NaN	10019.5	NaN	NaN	NaN	NaN	NaN	NaN	23641.6	9781.97	17282.2		Values	Intensity
C9JAW5;C9JNU6;Q9Y241;Q9Y241-2	;HIGD1A;HIGD1A;HIGD1A	Uncharacterized protein;Isoform of Q9Y241, HIG1 domain family member 1A, mitochondrial;HIG1 domain family member 1A, mitochondrial;Isoform of Q9Y241, Isoform 2 of HIG1 domain family member 1A, mitochondrial	342582	351474	165429	90805.7	107113	241686	111894	289038	481259	218446	330449	272709	115681	179620	188265	213540
A0A0J9YY99;P01768;P0DP03	;IGHV3-30;IGHV3-30-5	Uncharacterized protein (Fragment);Immunoglobulin heavy variable 3-30;Immunoglobulin heavy variable 3-30-5	83900.5	65958.4	36771.4	32419.2	20627.4	11128.1	18345.2	NaN	30757.4	11931.8	38709.5	3571.72	19205.1	12516.5	124890	20026.9
E7EVH7;F8W6L3;G3V2E7;G3V3H3;G3V5R9;G5E9S8;Q07866;Q07866-10;Q07866-2;Q07866-3;Q07866-4;Q07866-5;Q07866-6;Q07866-7;Q07866-8;Q07866-9	;KLC1;KLC1;KLC1;KLC1;KLC1;KLC1;KLC1;KLC1;KLC1;KLC1;KLC1;KLC1;KLC1;KLC1;KLC1	Uncharacterized protein;Isoform of Q07866, Kinesin light chain 1;Isoform of Q07866, Kinesin light chain 1;Isoform of Q07866, Kinesin light chain 1;Isoform of Q07866, Kinesin light chain 1;Isoform of Q07866, Kinesin light chain 1;Kinesin light chain 1;Isoform of Q07866, Isoform D of Kinesin light chain 1;Isoform of Q07866, Isoform C of Kinesin light chain 1;Isoform of Q07866, Isoform G of Kinesin …	12897	12771.3	11085.4	9390.95	12636.1	10151	9728.25	9507	10697	13948.5	9257.01	9879.87	14664.2	18028.6	12120.2	10140.2
A0A096LPI6;A0A0B4J2D5;P30042	;LOC102724023;C21orf33	Uncharacterized protein (Fragment);Isoform of P30042, Uncharacterized protein;ES1 protein homolog, mitochondrial	1.32097e+06	1.13966e+06	1.01417e+06	839916	711308	1.28023e+06	886351	1.04261e+06	1.72332e+06	1.31642e+06	1.16244e+06	1.30138e+06	967601	1.76107e+06	1.23087e+06	1.33022e+06
A0A087WV05;Q99417	;MYCBP	Isoform of C9IYK1, Uncharacterized protein;c-Myc-binding protein	18975.9	27711.4	26200.7	19554	21158	13895.5	5569.29	6315.01	6202.88	12526.7	11552.8	24478.9	16599.6	10753.6	7250.04	6477.04
J3QL48;J3QQN1;P40306	;PSMB10;PSMB10	Uncharacterized protein (Fragment);Isoform of P40306, Proteasome subunit beta type-10 (Fragment);Proteasome subunit beta type-10	NaN	NaN	3381.15	NaN	NaN	4086.07	NaN	NaN	4487.5	NaN	4899.5	NaN	NaN	NaN	NaN	NaN
H0YC42;P55327;P55327-2;P55327-3;P55327-4;P55327-5;P55327-6;P55327-7	;TPD52;TPD52;TPD52;TPD52;TPD52;TPD52;TPD52	Uncharacterized protein;Tumor protein D52;Isoform of P55327, Isoform 2 of Tumor protein D52;Isoform of P55327, Isoform 3 of Tumor protein D52;Isoform of P55327, Isoform 4 of Tumor protein D52;Isoform of P55327, Isoform 5 of Tumor protein D52;Isoform of P55327, Isoform 6 of Tumor protein D52;Isoform of P55327, Isoform 7 of Tumor protein D52	23872	18648.2	10262	10334.1	22057.3	20342.2	9820.79	16336.8	26471.9	18074.7	9049.22	12799.7	21321	30399.2	13502.8	23590.4
P04217	A1BG	Alpha-1B-glycoprotein	55267.8	68388.4	48720.6	54960	64620	40671.9	31848.7	36297.1	49698.8	35230.8	29036.4	52537.7	42574.2	59061.8	46455.7	45661.9
P01023	A2M	Alpha-2-macroglobulin	527166	754287	743165	601073	1.46494e+06	1.38865e+06	411052	790005	416382	430166	729289	1.05512e+06	2.13044e+06	1.41443e+06	825704	1.66116e+06
E9PNP3;Q9H7C9	AAMDC	Isoform of Q9H7C9, Mth938 domain-containing protein;Mth938 domain-containing protein	904634	859832	821825	593072	723983	874219	946716	1.00418e+06	1139226	906928	830872	573928	866611	845312	1.19105e+06	1.14307e+06
C9JEH3;C9JG97;Q13685	AAMP	Isoform of Q13685, Angio-associated migratory cell protein;Isoform of Q13685, Angio-associated migratory cell protein;Angio-associated migratory cell protein	8304.19	6771.42	10487.7	10370.9	9824.05	9570.11	8730.42	NaN	9885.78	8912.87	5358.44	6648.25	9400.5	11052.4	11820	10858.8
P49588	AARS	Alanine--tRNA ligase, cytoplasmic	26862.7	26280	20480.4	15226.4	18794.1	35282.7	26016.3	28233.3	29631.6	17452.5	22290.4	20828.4	15063.5	27111.3	23543.6	26406.4
Q9BTE6-2;Q9BTE6-3	AARSD1	Isoform of Q9BTE6, Isoform 2 of Alanyl-tRNA editing protein Aarsd1;Isoform of Q9BTE6, Isoform 3 of Alanyl-tRNA editing protein Aarsd1	34215.2	14694.7	2939.72	26513.5	27582.5	18113.2	13448.4	11367.6	17832.9	15552.8	15974.9	18281.1	17832.2	30677.1	16561.7	29414.7
Q9NRN7	AASDHPPT	L-aminoadipate-semialdehyde dehydrogenase-phosphopantetheinyl transferase	22461.7	22924.2	17357	11095.4	13238.8	16357.5	7728.39	23260.7	13644.6	6964.01	9803.3	14751.2	6059.04	20544	11614.1	10427.1
A0A0A0MSU4;O94911;O94911-3	ABCA8	Isoform of O94911, ATP-binding cassette sub-family A member 8;ATP-binding cassette sub-family A member 8;Isoform of O94911, Isoform 3 of ATP-binding cassette sub-family A member 8	NaN	NaN	12302.9	29469	15918.5	9146.58	NaN	2244.72	3017.66	NaN	1599.36	13338.4	10845	NaN	8229.94	11178.4
A0A087WW65;O75027;O75027-2;O75027-3	ABCB7	Isoform of O75027, ATP-binding cassette sub-family B member 7, mitochondrial;ATP-binding cassette sub-family B member 7, mitochondrial;Isoform of O75027, Isoform 2 of ATP-binding cassette sub-family B member 7, mitochondrial;Isoform of O75027, Isoform 3 of ATP-binding cassette sub-family B member 7, mitochondrial	6309.75	2883.45	7663.64	NaN	5849.75	8119.67	NaN	5227.69	5189.29	5314.4	4964.72	NaN	4982.37	4253.18	NaN	5418.63
O60706;O60706-2	ABCC9	ATP-binding cassette sub-family C member 9;Isoform of O60706, Isoform SUR2B of ATP-binding cassette sub-family C member 9	3170.08	NaN	NaN	NaN	NaN	NaN	NaN	8483.22	3478.55	5097.92	2135.6	6429.61	5862.29	NaN	NaN	6400.52
P61221	ABCE1	ATP-binding cassette sub-family E member 1	17051	16618.4	17949.6	11215.5	14537	14068	13615	13752.4	19301	15962.9	14334.5	20206.3	14143.5	14087.4	14491.5	16650.6
Q8NE71	ABCF1	ATP-binding cassette sub-family F member 1	12628.6	7984.98	13936	13626.4	15001.2	16107.5	10496.7	10736.7	16940.6	18394.6	11653.2	12820.2	15424.1	16226	15406.4	18202.5
C9JHK9;C9JZV3;Q9UG63;Q9UG63-2	ABCF2	Isoform of Q9UG63, ATP-binding cassette sub-family F member 2 (Fragment);Isoform of Q9UG63, ATP-binding cassette sub-family F member 2 (Fragment);ATP-binding cassette sub-family F member 2;Isoform of Q9UG63, Isoform 2 of ATP-binding cassette sub-family F member 2	NaN	NaN	4207.13	2479.25	3612.57	NaN	10987.3	1144.17	2470.34	NaN	1453.45	3035.99	2136.72	1660.49	3030.27	2778.45
Q9NUJ1	ABHD10	Mycophenolic acid acyl-glucuronide esterase, mitochondrial	23534.1	18707.4	21030.7	19157.2	19372.6	20216.8	13993	21007.1	24346.2	20687.7	16860.6	18987	17374.8	29316.7	20758.1	17535.3
Q8NFV4;Q8NFV4-4	ABHD11	Protein ABHD11;Isoform of Q8NFV4, Isoform 4 of Protein ABHD11	12669.1	15692.6	12157.2	15419	5592.24	19565.3	9091.4	9621.25	21685.9	9489.96	16110.8	9404.46	6604.4	9639.55	21496.1	16067.9
Q96IU4	ABHD14B	Protein ABHD14B	62480.2	74862.8	62160.4	70093.3	63774.7	53435.8	62281.3	58484.8	61573.6	62952.3	82012.8	68706.9	54872.5	50751	68126.2	64058.4
Q8WTS1	ABHD5	1-acylglycerol-3-phosphate O-acyltransferase ABHD5	17170	13849	NaN	NaN	17192.5	23706.7	1029.87	17535.6	NaN	13786.3	20791.1	19632.1	18628	26722.2	14915.6	28795.1
D3YTG3;Q7Z7G0	ABI3BP	Isoform of Q7Z7G0, Target of Nesh-SH3;Target of Nesh-SH3	5614.64	NaN	3098.14	3507.55	18889.3	472524	3794.78	3144.28	7971.07	2152.48	4687.48	26823.3	131057	12760.8	12546.2	67520.5
A0A0A0MRL6;F8W8M4;O14639;O14639-2;O14639-6	ABLIM1	Isoform of O14639, Actin-binding LIM protein 1;Isoform of O14639, Actin-binding LIM protein 1;Actin-binding LIM protein 1;Isoform of O14639, Isoform 2 of Actin-binding LIM protein 1;Isoform of O14639, Isoform 6 of Actin-binding LIM protein 1	6643.21	2991.66	7921	7081.16	9293.75	6984.82	7374.76	13406	5442.01	5463.21	6419.93	5135.82	5147.98	8564.35	3951.71	8926.53
Q6H8Q1-9	ABLIM2	Isoform of Q6H8Q1, Isoform 9 of Actin-binding LIM protein 2	41322.3	43108.9	42021.7	41636.7	45983.8	36530.3	38429.1	36058.4	32900.1	34536.6	38689.2	34564.9	35274.8	31179.5	39921.2	26816.2
A0A0C4DGA7;O94929;O94929-2;O94929-3	ABLIM3	Isoform of O94929, Actin-binding LIM protein 3;Actin-binding LIM protein 3;Isoform of O94929, Isoform 2 of Actin-binding LIM protein 3;Isoform of O94929, Isoform 3 of Actin-binding LIM protein 3	NaN	NaN	4416.91	6312.43	4952.73	NaN	NaN	6870.41	3727.34	3457.75	7203.14	3489.16	5412.38	NaN	5441.13	NaN
Q8N0Z2	ABRA	Actin-binding Rho-activating protein	NaN	NaN	NaN	NaN	NaN	NaN	NaN	NaN	NaN	8104.34	NaN	3192.47	18674.1	NaN	NaN	4920.66
Q5SZC9;Q9P1F3	ABRACL	Isoform of Q9P1F3, Costars family protein ABRACL;Costars family protein ABRACL	8451.1	9384.68	7572.32	15144.3	15750.2	4562.31	4158.37	4500.22	14550.8	9822.28	9807.3	7595.39	19640.7	23854.4	11241.9	10575.2
Q15018	ABRAXAS2	BRISC complex subunit Abraxas 2	11933.8	12268.7	6351.04	9460.91	18224.6	13215.6	10439.4	10936.1	12374.1	11088.6	9764.29	10452.4	11834.1	10450.6	11021.7	12084
P09110	ACAA1	3-ketoacyl-CoA thiolase, peroxisomal	43099.6	138910	53407.5	63491.7	33020.4	56551.2	29424.9	47236.2	64200.7	50661.7	46894.4	41515.9	62022.3	31614.6	38927	65166.5
A0A0B4J2A4;P42765	ACAA2	Isoform of P42765, 3-ketoacyl-CoA thiolase, mitochondrial;3-ketoacyl-CoA thiolase, mitochondrial	822720	846647	878669	511604	462232	1.17069e+06	673059	962148	959398	867675	839513	1.03969e+06	680675	815862	1069567	1.00486e+06
Q9UKU7	ACAD8	Isobutyryl-CoA dehydrogenase, mitochondrial	62908.1	61515.8	81897	58671.9	67385.5	72952.4	54589.3	64644.7	62720.6	77232.1	70065.1	73388	68868.1	43365	70407.4	77615.5
Q9H845	ACAD9	Acyl-CoA dehydrogenase family member 9, mitochondrial	NaN	5534.29	21800.7	9971.54	19816	11176.3	15397.4	16732.6	2767.53	17570.3	10512.9	15234.7	11258.9	13191.7	6569.22	16370.3
P11310;P11310-2;Q5T4U5	ACADM	Medium-chain specific acyl-CoA dehydrogenase, mitochondrial;Isoform of P11310, Isoform 2 of Medium-chain specific acyl-CoA dehydrogenase, mitochondrial;Isoform of P11310, Acyl-Coenzyme A dehydrogenase, C-4 to C-12 straight chain, isoform CRA_a	1.31524e+06	1.10814e+06	1.31385e+06	1.06568e+06	971747	1.75909e+06	999236	1.33124e+06	1.53358e+06	1.07273e+06	1.23098e+06	1.66868e+06	1.343e+06	1.2562e+06	1.47109e+06	1.20702e+06
P16219	ACADS	Short-chain specific acyl-CoA dehydrogenase, mitochondrial	371553	533741	827801	376853	377295	653959	483310	672624	366588	686048	544975	478662	409728	425594	651574	732296
P45954	ACADSB	Short/branched chain specific acyl-CoA dehydrogenase, mitochondrial	40274	55110.3	80428.1	59870.2	72405.1	85410.8	71710.6	73155.8	42365.4	74314.7	64163.8	67715.5	70095.2	63735	79171.4	63039.8
P49748;P49748-3	ACADVL	Very long-chain specific acyl-CoA dehydrogenase, mitochondrial;Isoform of P49748, Isoform 3 of Very long-chain specific acyl-CoA dehydrogenase, mitochondrial	738500	748490	607057	495439	493892	956796	577583	815546	874501	753388	815290	832074	629550	786228	968426	865323
P24752	ACAT1	Acetyl-CoA acetyltransferase, mitochondrial	1836907	2273242	4.11824e+06	2.69424e+06	2.4617e+06	3.168e+06	1.78128e+06	2377622	2.32478e+06	3.76565e+06	2700880	4.02038e+06	2.94613e+06	2.26268e+06	2435507	3057046
Q9BWD1;Q9BWD1-2	ACAT2	Acetyl-CoA acetyltransferase, cytosolic;Isoform of Q9BWD1, Isoform 2 of Acetyl-CoA acetyltransferase, cytosolic	17036.2	20311.6	32963	27923.6	26615.4	12538.4	28672.4	8677.54	23443.9	36258.4	11144.3	20388.7	32691.6	11453.9	17864.7	13767.4
Q9H3P7	ACBD3	Golgi resident protein GCP60	16963.4	13671.1	20633.8	15026.5	16754.5	15706.4	11578.9	13385.3	18442.3	13633.3	12517.5	15461.9	14305.8	17081.3	13965.6	43584.6
B7Z2R7;Q5T8D3;Q5T8D3-2;Q5T8D3-3;Q5T8D3-4	ACBD5	Isoform of Q5T8D3, Acyl-CoA-binding domain-containing protein 5;Acyl-CoA-binding domain-containing protein 5;Isoform of Q5T8D3, Isoform 2 of Acyl-CoA-binding domain-containing protein 5;Isoform of Q5T8D3, Isoform 3 of Acyl-CoA-binding domain-containing protein 5;Isoform of Q5T8D3, Isoform 4 of Acyl-CoA-binding domain-containing protein 5	62491.6	NaN	22219.1	NaN	NaN	4597.87	NaN	61901.7	3516.36	209172	2935.3	435903	259061	5881.2	3373.51	NaN
E7EQT4;Q9UKV3;Q9UKV3-5;S4R3H4	ACIN1	Isoform of Q9UKV3, Apoptotic chromatin condensation inducer in the nucleus;Apoptotic chromatin condensation inducer in the nucleus;Isoform of Q9UKV3, Isoform 4 of Apoptotic chromatin condensation inducer in the nucleus;Isoform of Q9UKV3, Apoptotic chromatin condensation inducer in the nucleus	10428.3	11135.5	9481.89	14010.2	12745.2	13725.2	15510.4	12612.4	15079.9	2139.33	14593.2	20136.5	13152.5	19402.4	12956.2	12507.5
P53396;P53396-2	ACLY	ATP-citrate synthase;Isoform of P53396, Isoform 2 of ATP-citrate synthase	4831.24	109275	172049	118915	16285.3	3445.67	176235	3881.11	50188.6	9326.85	214050	21570.9	8803.31	191783	171519	12522.1
P21399	ACO1	Cytoplasmic aconitate hydratase	79439.4	85995.1	108017	76178.6	87830.1	112781	71720.3	90091.3	108881	80568.1	62133	80063	95318.6	95148.7	56855.5	61928.5
Q99798	ACO2	Aconitate hydratase, mitochondrial	3.29964e+06	2.07934e+06	3.32224e+06	2.0642e+06	2134885	2.92201e+06	2.0832e+06	2482729	3.81104e+06	3.53227e+06	2.88124e+06	3223303	2841190	1.77634e+06	2.10031e+06	2.80165e+06
Q9NPJ3	ACOT13	Acyl-coenzyme A thioesterase 13	51305.8	60790.5	45463.6	46351.4	41792.3	58644.9	54363.8	57255	63770	61814.4	79938.9	59248	53977.4	45291.3	56811.6	73754
A0A087WT95;A0A087X0W7;P49753;Q86TX2	ACOT2;ACOT2;ACOT2;ACOT1	Isoform of P49753, Acyl-coenzyme A thioesterase 2, mitochondrial;Isoform of P49753, Acyl-coenzyme A thioesterase 2, mitochondrial;Acyl-coenzyme A thioesterase 2, mitochondrial;Acyl-coenzyme A thioesterase 1	492957	675614	1.02257e+06	612043	556204	813156	422406	692117	661900	791681	626025	882795	515230	433431	392614	769503
O00154-2;O00154-3;O00154-4;O00154-7	ACOT7	Isoform of O00154, Isoform 2 of Cytosolic acyl coenzyme A thioester hydrolase;Isoform of O00154, Isoform 3 of Cytosolic acyl coenzyme A thioester hydrolase;Isoform of O00154, Isoform 4 of Cytosolic acyl coenzyme A thioester hydrolase;Isoform of O00154, Isoform 7 of Cytosolic acyl coenzyme A thioester hydrolase	NaN	NaN	69325	NaN	NaN	87993.7	74217.8	NaN	NaN	NaN	NaN	NaN	NaN	NaN	NaN	69498.9
Q9Y305;Q9Y305-2;Q9Y305-4	ACOT9	Acyl-coenzyme A thioesterase 9, mitochondrial;Isoform of Q9Y305, Isoform 2 of Acyl-coenzyme A thioesterase 9, mitochondrial;Isoform of Q9Y305, Isoform 4 of Acyl-coenzyme A thioesterase 9, mitochondrial	19305.4	20257.1	15323	16121	18118.8	17118.7	13954.6	24824.6	17114.8	21491.2	20730.2	42908.5	29764	14670	15723.4	20836.6
P24666	ACP1	Low molecular weight phosphotyrosine protein phosphatase	235974	226549	256805	453470	253079	375508	233574	221852	226469	205729	201985	440099	245664	344896	244101	211290
Q96CM8;Q96CM8-2;Q96CM8-3	ACSF2	Acyl-CoA synthetase family member 2, mitochondrial;Isoform of Q96CM8, Isoform 2 of Acyl-CoA synthetase family member 2, mitochondrial;Isoform of Q96CM8, Isoform 3 of Acyl-CoA synthetase family member 2, mitochondrial	27404	29694.8	30885.5	24647.7	26023.6	24626.4	21913	31435.4	38725.2	33640.2	30993	37950.5	36265.5	15043.9	28765.8	30334.1
F5H5A1;Q4G176	ACSF3	Isoform of Q4G176, Acyl-CoA synthetase family member 3, mitochondrial;Acyl-CoA synthetase family member 3, mitochondrial	14646.7	18210.7	19130.8	NaN	1939.87	12180.5	8542.88	2952.08	9882.44	11347.8	11864.2	12095.2	14951.4	2750.7	22188.8	30042.4
P33121	ACSL1	Long-chain-fatty-acid--CoA ligase 1	342191	369088	311380	242315	241150	473459	311823	345763	587000	495105	373702	537633	409733	312274	416014	401416
O95573	ACSL3	Long-chain-fatty-acid--CoA ligase 3	14563.1	13495.4	13385	10727.7	13092.6	11177.4	16755.2	11940.5	14233.4	17463.8	13461.6	15104.3	11494.1	10915.4	22109	9571.9
O60488;O60488-2	ACSL4	Long-chain-fatty-acid--CoA ligase 4;Isoform of O60488, Isoform Short of Long-chain-fatty-acid--CoA ligase 4	NaN	NaN	NaN	2459.75	4696.49	NaN	NaN	2708.84	NaN	NaN	9595.57	NaN	4594.83	NaN	NaN	5971.93
Q9NUB1;Q9NUB1-2	ACSS1	Acetyl-coenzyme A synthetase 2-like, mitochondrial;Isoform of Q9NUB1, Isoform 2 of Acetyl-coenzyme A synthetase 2-like, mitochondrial	17567.2	17988.2	22172.7	9568.2	18023.3	52262.4	11634.3	28203	24600.3	23350.4	16927.9	19657.2	22605.3	21949.2	17536.8	18380
Q9NR19;Q9NR19-2	ACSS2	Acetyl-coenzyme A synthetase, cytoplasmic;Isoform of Q9NR19, Isoform 2 of Acetyl-coenzyme A synthetase, cytoplasmic	12576.4	19284.9	16991.5	8830.37	7411.24	23259.9	18524.5	15720.4	18467.2	19616.2	13682.8	21127.7	22082.7	13557.7	19985	16922
A0A0B4J1R2;Q9H6R3	ACSS3	Isoform of Q9H6R3, Acyl-CoA synthetase short-chain family member 3, mitochondrial;Acyl-CoA synthetase short-chain family member 3, mitochondrial	17431.9	335256	7976.2	23639.7	NaN	NaN	2498.47	NaN	16489.7	85471.2	47108.2	14584.6	16719.5	NaN	NaN	3908.05
P68133	ACTA1	Actin, alpha skeletal muscle	37083988	42813712	22456892	31928726	29491510	32537428	39885452	33908092	29751304	30714328	37868356	3.67258e+06	26912760	22052204	30765620	26195372
P62736	ACTA2	Actin, aortic smooth muscle	11407.3	11807.8	NaN	NaN	25929.3	27715.5	31150.1	43781.4	26989.9	15184.4	93033.6	69851.8	18537.6	53531.4	33316.4	NaN
P60709	ACTB	Actin, cytoplasmic 1	6.93989e+06	7279192	1.53424e+06	7.93683e+06	1.67631e+06	4500175	8.08538e+06	8019383	6329408	7448445	8080028	6979562	1.67491e+06	5592896	6980040	4.65471e+06
Q562R1	ACTBL2	Beta-actin-like protein 2	1.75877e+06	4928391	4128066	3.43522e+06	1.04157e+06	6186936	7235485	4.0538e+06	6511120	2.05709e+06	8207334	1.77903e+06	6909493	2.54052e+06	6208809	4.37182e+06
P68032	ACTC1	Actin, alpha cardiac muscle 1	86716592	264616112	289309056	257944688	307117408	289276896	275788320	273533888	243830624	277197632	277248032	269171328	253289040	209705056	254665248	281453216
P63261	ACTG1	Actin, cytoplasmic 2	712066	742568	416851	390882	594263	420846	347017	471244	627751	500216	445274	497450	672040	939758	499389	400982
P12814-2;P12814-3;P12814-4	ACTN1	Isoform of P12814, Isoform 2 of Alpha-actinin-1;Isoform of P12814, Isoform 3 of Alpha-actinin-1;Isoform of P12814, Isoform 4 of Alpha-actinin-1	2.63722e+06	3.0227e+06	3731979	3656428	3.88137e+06	3.46961e+06	5367625	4.17784e+06	3.03986e+06	4265869	4.15523e+06	2.66857e+06	3441890	2.49088e+06	3.37832e+06	3.13916e+06
P35609	ACTN2	Alpha-actinin-2	7.79657e+06	8153735	9966415	8781672	10416328	9351474	12178625	9746710	6447880	11227472	9621792	6133240	8.13446e+06	6310293	8942818	8601453
Q08043	ACTN3	Alpha-actinin-3	571036	62813	714875	1.67314e+06	1.50304e+06	476006	27226.4	1.09325e+06	479257	22401.6	592376	1074453	916347	233344	21460.7	680371
O43707	ACTN4	Alpha-actinin-4	670850	625076	749826	827280	875810	985082	1.2713e+06	826829	565195	1.15854e+06	1.07309e+06	649135	767752	605947	1.01095e+06	1.0372e+06
Q9NZ32;V9GYX7	ACTR10	Actin-related protein 10;Isoform of Q9NZ32, Actin-related protein 10 (Fragment)	NaN	NaN	NaN	3939.66	6849.87	4332	1.49938e+06	3.80256e+06	4392.56	4419.87	3622.14	4669.24	1.86607e+06	NaN	NaN	3964.19
P61163;R4GMT0	ACTR1A	Alpha-centractin;Isoform of P61163, Alpha-centractin	82810.4	31554.6	47679.8	52283.3	44448.3	52606.1	42967.7	46332.5	50535.3	35363.5	41156.4	39594.9	47406.1	41638	31258.3	33466.9
P42025	ACTR1B	Beta-centractin	95721.8	47316.8	118311	72643.4	79583.4	74694.6	52816.8	NaN	79024.9	79724	54493.8	67623.9	NaN	88608.1	57346.3	54052.1
P61160;P61160-2	ACTR2	Actin-related protein 2;Isoform of P61160, Isoform 2 of Actin-related protein 2	29170.6	34255.1	24496.6	34812.4	20495.4	29035.8	18203.5	16498.7	29614.8	30413.9	21486.2	26263.9	39095.3	25167.9	28543.7	35620.8
P61158	ACTR3	Actin-related protein 3	54751	47475.1	29308.4	14717.4	26659.6	37600.7	25899.3	28875.3	45195.8	28199	36384.7	29495.1	34611.2	33174.6	35991.7	32209.1
A0A1B0GU86;Q03154	ACY1	Isoform of Q03154, Aminoacylase-1;Aminoacylase-1	187576	176608	144547	191343	142945	233356	194209	198233	266473	219208	153186	199323	179026	233814	196685	219657
G3V2U7;P07311	ACYP1	Isoform of P07311, Acylphosphatase;Acylphosphatase-1	NaN	NaN	9985.98	NaN	12148.9	7206.78	8384.43	NaN	7965.87	6393.82	8195.52	9086.18	10606.3	NaN	NaN	7280.91
P14621	ACYP2	Acylphosphatase-2	457966	417125	542653	698508	540348	630778	516196	568672	512995	424567	601229	752886	620554	597659	521541	571192
F5GWI4;P00813	ADA	Isoform of P00813, Adenosine deaminase;Adenosine deaminase	3099.8	NaN	3315.23	2927.02	4433.77	95170.2	3376.55	64993.7	64176.1	96902.8	3766.93	156294	6254.53	22086.2	6895.23	5596.34
Q6DHV7;Q6DHV7-2	ADAL	Adenosine deaminase-like protein;Isoform of Q6DHV7, Isoform 2 of Adenosine deaminase-like protein	14975.2	16061.7	10540.8	5692.24	10389.5	13675.8	9377.92	9696.84	14254.8	8026.92	10217.1	7271.95	9971.11	11407.1	10909	11187.7
E7ENY0;E7EV99;P35611;P35611-2;P35611-3;P35611-6	ADD1	Isoform of P35611, Alpha-adducin;Isoform of P35611, Alpha-adducin;Alpha-adducin;Isoform of P35611, Isoform 2 of Alpha-adducin;Isoform of P35611, Isoform 3 of Alpha-adducin;Isoform of P35611, Isoform 6 of Alpha-adducin	20253.1	17745	20139.4	21985.4	19917.2	20904.8	15567.8	12418.6	21349.2	16707.2	15375	22471.3	24188.2	21205.1	22546.9	20027.1
P35612	ADD2	Beta-adducin	17257.7	14281.9	10931.1	23581.1	14955.4	11867.4	10484.7	8459.17	6439.38	6955.68	6787.5	9389.93	12367	18784.8	16787.7	7325.26
Q9UEY8;Q9UEY8-2	ADD3	Gamma-adducin;Isoform of Q9UEY8, Isoform 1 of Gamma-adducin	2542.79	125662	5046.07	83846.9	219412	2718.66	139345	23833.1	14537.2	17793.9	64518.1	35222.7	46270.2	12713.9	27666.6	10328.6
P00325;V9HW50	ADH1B;HEL-S-117	Alcohol dehydrogenase 1B;Isoform of P00325, Alcohol dehydrogenase 1B	95863.7	100625	195016	149750	113822	51418	137924	112766	87791.9	102750	154891	142485	64690.6	36542.5	169754	93786.1
P00326	ADH1C	Alcohol dehydrogenase 1C	NaN	NaN	NaN	NaN	5247.19	3974.26	NaN	NaN	3750.46	1832.9	1882.19	2365.16	3778.59	NaN	NaN	2843.97
P11766	ADH5	Alcohol dehydrogenase class-3	175127	175412	233012	177018	202876	184908	155652	125242	159062	145411	121951	181633	157156	127791	132575	127304
Q8IWW8;Q8IWW8-2	ADHFE1	Hydroxyacid-oxoacid transhydrogenase, mitochondrial;Isoform of Q8IWW8, Isoform 2 of Hydroxyacid-oxoacid transhydrogenase, mitochondrial	59542.3	58242.3	40446.2	17755.4	48867.2	53265.1	29859.5	20982.4	87620.3	44269.9	27963.1	44972.6	69269.5	40389.8	31342.5	24371.4
Q9BV57	ADI1	1,2-dihydroxy-3-keto-5-methylthiopentene dioxygenase	9835.43	12198.4	9204.08	8196.71	9282	13501.5	8995.59	12528.8	7523.41	7794.99	13290.5	9876.89	7915.03	11841.4	15052.6	7770.21
Q15848	ADIPOQ	Adiponectin	61762.1	69792.5	98423.9	64985.8	76199.1	67557.5	54160.4	63539	68404.8	60442.5	52011.8	66228.3	71670.8	60902.2	60544.9	70481.9
Q15847	ADIRF	Adipogenesis regulatory factor	83744.6	100708	47087.3	66386.7	46026	51052.4	50138.5	49552.2	72131.6	60332.5	50908.9	53646.9	64708.9	91342.8	91100.7	56729.7
P55263;P55263-3	ADK	Adenosine kinase;Isoform of P55263, Isoform 3 of Adenosine kinase	24959.6	19548.9	31114.8	21126	26473.9	28642.8	23326.8	20882.7	31002.5	20964.6	25248.3	23915.9	26021.4	25889.7	18844.8	26473
Q96SZ5	ADO	2-aminoethanethiol dioxygenase	NaN	2947.23	NaN	NaN	6069.04	NaN	6930.84	NaN	NaN	7062.1	NaN	8203.91	7219.31	NaN	NaN	7484.87
A0A0U1RQK4	ADPRHL1	Isoform of Q8NDY3, [Protein ADP-ribosylarginine] hydrolase-like protein 1	448775	485884	359405	451545	465669	412284	227433	473961	447769	474636	290863	462010	425335	310500	204784	407632
Q9NX46	ADPRHL2	Poly(ADP-ribose) glycohydrolase ARH3	120562	49357.9	65110.9	58956.4	61544.5	64392.9	53334.6	47331.6	58078.7	46119.5	45098.3	49739.8	62111.1	62787	48366.8	47180.4
A0A087WX59;Q16186	ADRM1	Isoform of Q16186, Proteasomal ubiquitin receptor ADRM1;Proteasomal ubiquitin receptor ADRM1	86187.8	44124.1	71046.1	65227.8	78053.5	69138.9	59919.5	59647.7	67318	46442	45216.7	64287.6	65319.3	63559.2	71387.4	65805.1
A0A1B0GTJ7;A0A1B0GWJ0;P30566	ADSL	Isoform of P30566, Adenylosuccinate lyase;Isoform of P30566, Adenylosuccinate lyase;Adenylosuccinate lyase	272789	271802	261474	294574	279837	281865	266386	284250	280165	278855	173598	245524	261254	151509	216417	276843
P30520	ADSS	Adenylosuccinate synthetase isozyme 2	NaN	NaN	NaN	9490.84	10564.9	NaN	9980.92	7128	10935	9686.68	6898.63	8638.67	9783.92	11425.3	11271.4	8421.86
Q8N142	ADSSL1	Adenylosuccinate synthetase isozyme 1	702607	766291	862633	615447	778253	875040	446278	626364	853997	794352	542182	632856	697348	442364	487167	708949
Q8IUX7	AEBP1	Adipocyte enhancer-binding protein 1	2515.88	NaN	1130.75	NaN	NaN	NaN	NaN	NaN	NaN	NaN	NaN	NaN	427.26	5615.79	NaN	2693.47
A8MQ02;J3KN01;P55196;P55196-5	AFDN	Isoform of P55196, Afadin;Isoform of P55196, Afadin;Afadin;Isoform of P55196, Isoform 5 of Afadin	NaN	NaN	64283.7	180749	74831.6	9731.44	47988.7	9620.65	10847.2	6992.1	7695.62	10212.3	37079.5	NaN	NaN	7280.96
Q9Y4W6	AFG3L2	AFG3-like protein 2	31745.9	24992.6	22803.4	13348	15773.7	27323.5	19314.6	32010.9	38658.8	25329.9	32372.6	30244.6	21139.5	30413.6	34384.1	40233.6
P43652	AFM	Afamin	6888.13	4811.95	3344.83	5678.77	5523.44	7869.89	5085.48	7427.68	7814.4	8734.96	11277	6627.51	9845.24	12741.3	11730.3	11012.3
E9PR59;E9PRJ1;F6U0I4;H9KV53;Q5U5Z8	AGBL2	Isoform of Q5U5Z8, Cytosolic carboxypeptidase 2 (Fragment);Isoform of Q5U5Z8, Cytosolic carboxypeptidase 2 (Fragment);Isoform of Q5U5Z8, Cytosolic carboxypeptidase 2;Isoform of Q5U5Z8, Cytosolic carboxypeptidase 2;Cytosolic carboxypeptidase 2	NaN	NaN	23039.3	40948.6	NaN	13914.6	26134	15304.7	14499.4	16991.6	29856	NaN	10411.1	7327.23	14575.7	NaN
P52594;P52594-2;P52594-3;P52594-4	AGFG1	Arf-GAP domain and FG repeat-containing protein 1;Isoform of P52594, Isoform 2 of Arf-GAP domain and FG repeat-containing protein 1;Isoform of P52594, Isoform 3 of Arf-GAP domain and FG repeat-containing protein 1;Isoform of P52594, Isoform 4 of Arf-GAP domain and FG repeat-containing protein 1	27416.6	20729	26821.6	21784.9	28200.7	NaN	NaN	5821.59	15548.7	NaN	NaN	23943.3	NaN	36842.6	21778.2	NaN
Q53H12	AGK	Acylglycerol kinase, mitochondrial	NaN	NaN	NaN	NaN	NaN	24563.6	2010.97	23224.3	19234	15231.6	9733.29	8647.78	4124.89	16878.9	9650.73	13429.4
P35573	AGL	Glycogen debranching enzyme	812180	613229	603565	800642	825469	575944	613825	700512	870302	806318	606236	571820	864502	421724	554667	900782
Q9BSE5	AGMAT	Agmatinase, mitochondrial	50806.5	128645	187103	132316	112546	67283.3	105098	160644	45326.9	135462	149358	108219	144262	57866.6	183342	198056
Q9UKV8;Q9UKV8-2	AGO2	Protein argonaute-2;Isoform of Q9UKV8, Isoform 2 of Protein argonaute-2	461809	473847	7934.59	543409	20302.4	19065.5	432646	410274	468245	426423	458550	411799	754880	677997	771476	399846
O00116	AGPS	Alkyldihydroxyacetonephosphate synthase, peroxisomal	12773.7	NaN	15198.4	7976.74	15769.7	NaN	NaN	NaN	24138.5	NaN	8355	NaN	NaN	18578.8	8073.89	7606.2
A0A087X208;O00468;O00468-2;O00468-3;O00468-4;O00468-5;O00468-6;O00468-7	AGRN	Isoform of O00468, Agrin;Agrin;Isoform of O00468, Isoform 2 of Agrin;Isoform of O00468, Isoform 3 of Agrin;Isoform of O00468, Isoform 4 of Agrin;Isoform of O00468, Isoform 5 of Agrin;Isoform of O00468, Isoform 6 of Agrin;Isoform of O00468, Isoform 7 of Agrin	NaN	NaN	787.79	1140.53	NaN	1481.8	NaN	1214.28	NaN	NaN	NaN	7677.48	NaN	NaN	1670.27	NaN
P01019	AGT	Angiotensinogen	63572.5	64586.4	10372.4	17329.3	84924.8	57205.4	12232.6	43508.9	54792.8	14359.3	23979.3	12765.5	80316.6	24735.4	60705.5	55505
Q8WYP5;Q8WYP5-2;Q8WYP5-3	AHCTF1	Protein ELYS;Isoform of Q8WYP5, Isoform 2 of Protein ELYS;Isoform of Q8WYP5, Isoform 3 of Protein ELYS	24459.1	NaN	NaN	NaN	NaN	17302.1	26743.5	35478.5	25726.1	27776.5	25399	NaN	31122.1	NaN	19382.6	45826.4
P23526	AHCY	Adenosylhomocysteinase	162403	181421	151960	142078	155967	206225	160120	134291	167788	148302	128711	168303	175635	171032	187394	161043
O43865	AHCYL1	S-adenosylhomocysteine hydrolase-like protein 1	NaN	NaN	NaN	NaN	NaN	NaN	NaN	16441.6	NaN	3553.87	NaN	NaN	3271.51	NaN	5774.59	7639.07
Q96HN2;Q96HN2-2	AHCYL2	Adenosylhomocysteinase 3;Isoform of Q96HN2, Isoform 2 of Adenosylhomocysteinase 3	17309.6	17693.9	118983	74285.7	175985	19540.8	54900.9	13725.7	15602.3	46721.8	11624.2	53181.5	116330	10923.3	15565.2	15380.9
Q09666	AHNAK	Neuroblast differentiation-associated protein AHNAK	367281	398219	310126	252542	402958	401697	288063	224946	449132	319744	259080	354017	430131	907940	498236	401301
O95433;O95433-2	AHSA1	Activator of 90 kDa heat shock protein ATPase homolog 1;Isoform of O95433, Isoform 2 of Activator of 90 kDa heat shock protein ATPase homolog 1	38276.9	37209.2	45557.5	25832.6	35389.7	21359.9	24083.6	25741.3	32659.4	33520.8	31214.7	33667.4	28621	28140	30787.9	19933.2
C9JV77;P02765	AHSG	Isoform of P02765, Alpha-2-HS-glycoprotein;Alpha-2-HS-glycoprotein	235200	181292	206805	162291	218147	156940	102603	90885.8	169536	122892	116455	122362	222665	240551	150398	134176
Q9NZD4	AHSP	Alpha-hemoglobin-stabilizing protein	123469	112171	54861.2	59011.4	80463.9	71180.9	36806.6	18424.3	37800.1	45971.7	24868.1	31965.1	73043.1	90376.1	57004	42852.5
Q96BJ3;Q96BJ3-3	AIDA	Axin interactor, dorsalization-associated protein;Isoform of Q96BJ3, Isoform 3 of Axin interactor, dorsalization-associated protein	NaN	NaN	NaN	5575.9	NaN	2091.45	NaN	NaN	NaN	3167.43	NaN	NaN	3561.55	4171.9	NaN	2420.45
O95831;O95831-3	AIFM1	Apoptosis-inducing factor 1, mitochondrial;Isoform of O95831, Isoform 3 of Apoptosis-inducing factor 1, mitochondrial	447355	350281	313289	274411	267433	365849	291508	421328	584165	420483	328910	447935	392502	285080	330193	452046
Q12904;Q12904-2	AIMP1	Aminoacyl tRNA synthase complex-interacting multifunctional protein 1;Isoform of Q12904, Isoform 2 of Aminoacyl tRNA synthase complex-interacting multifunctional protein 1	43195.9	112938	63795.5	53953.5	51031.7	46053.6	34515.8	36855.6	43631.2	37023.3	41619.9	52723.2	36695.3	41859.1	43112.5	38231.7
Q13155	AIMP2	Aminoacyl tRNA synthase complex-interacting multifunctional protein 2	31596.4	27760.7	33540.1	37129.7	32461.3	18957.7	13503.7	13082.3	16964.6	20418.6	16810	19949	12735.3	10563.3	16147.3	15185.4
O00170	AIP	AH receptor-interacting protein	NaN	NaN	NaN	NaN	NaN	NaN	NaN	8741.95	9594.92	15758.7	5634.46	NaN	NaN	9752.3	NaN	NaN
P00568;Q5T9B7	AK1	Adenylate kinase isoenzyme 1;Isoform of P00568, Adenylate kinase isoenzyme 1	5.90475e+06	5.3348e+06	6064391	8711832	7.02631e+06	5173187	5517327	7847397	7729826	6.11583e+06	4.87654e+06	9011758	7.38325e+06	5.51482e+06	5156525	9863286
F8W1A4;P54819;P54819-2	AK2	Isoform of P54819, Adenylate kinase 2, mitochondrial;Adenylate kinase 2, mitochondrial;Isoform of P54819, Isoform 2 of Adenylate kinase 2, mitochondrial	216673	173613	193317	167008	124705	197420	157942	187459	217527	178932	201974	302586	166749	171569	191738	206277
Q9UIJ7	AK3	GTP:AMP phosphotransferase AK3, mitochondrial	1.04273e+06	787649	825302	434376	553891	1.24314e+06	735864	873765	1.70415e+06	962968	870128	870768	916682	1.46879e+06	1.03194e+06	1121033
Q9Y3D8;Q9Y3D8-2	AK6	Adenylate kinase isoenzyme 6;Isoform of Q9Y3D8, Isoform 2 of Adenylate kinase isoenzyme 6	NaN	NaN	169550	161908	630492	5950.33	NaN	NaN	NaN	NaN	NaN	12250.8	NaN	13030.5	NaN	NaN
Q92667	AKAP1	A-kinase anchor protein 1, mitochondrial	44826.9	50752.1	44750.1	37685.1	48027.3	56900.5	38875.7	37146.6	68605.8	69628	45256.1	62171.8	54038	59165.2	45925.1	49319.3
Q02952;Q02952-2;Q02952-3	AKAP12	A-kinase anchor protein 12;Isoform of Q02952, Isoform 2 of A-kinase anchor protein 12;Isoform of Q02952, Isoform 3 of A-kinase anchor protein 12	20847.6	15119.9	44383.7	34631.1	35642.2	35183.3	24813.1	18040.5	33295.4	32055.9	20973.9	29799.4	16889.6	67056.9	25849	27984
H0YMW2;Q12802;Q12802-2;Q12802-4	AKAP13	Isoform of Q12802, A-kinase anchor protein 13 (Fragment);A-kinase anchor protein 13;Isoform of Q12802, Isoform 2 of A-kinase anchor protein 13;Isoform of Q12802, Isoform 3 of A-kinase anchor protein 13	32170.4	37801.9	31149	38134	NaN	31563.5	33656.6	53496	33715.6	NaN	60166.1	36636	NaN	45673.2	41328.5	53658.5
Q9Y2D5-4;Q9Y2D5-6	AKAP2	Isoform of Q9Y2D5, Isoform 3 of A-kinase anchor protein 2;Isoform of Q9Y2D5, Isoform 4 of A-kinase anchor protein 2	16857.6	13137.2	7979.45	11666.8	6617.8	25936.8	14748.7	13122.1	12701.7	6466.62	11178.7	9883.89	10504.7	13611.2	14629.4	11762.9
Q13023	AKAP6	A-kinase anchor protein 6	NaN	NaN	NaN	NaN	NaN	NaN	NaN	NaN	NaN	10744.4	NaN	NaN	NaN	4616.58	NaN	NaN
F5GXD1;Q9P0M2	AKAP7	Isoform of Q9P0M2, A-kinase anchor protein 7 isoform gamma;A-kinase anchor protein 7 isoform gamma	NaN	NaN	6760.33	5262.29	NaN	NaN	NaN	7708.98	NaN	5388.74	4706.17	4477.48	4821.75	NaN	NaN	8125.83
O43823	AKAP8	A-kinase anchor protein 8	NaN	NaN	15991.3	NaN	NaN	15638.5	NaN	8978.5	889.792	22944.6	NaN	6695.69	8518.59	2043.3	7050.79	8865.66
P14550	AKR1A1	Alcohol dehydrogenase [NADP(+)]	705013	766041	1.17828e+06	876458	1.15059e+06	1.05142e+06	972218	632410	947850	824899	638673	1.22878e+06	933436	519814	618938	732618
P15121	AKR1B1	Aldose reductase	732485	907750	1.29425e+06	1.17586e+06	1243258	1.17449e+06	943230	817217	952757	943642	781386	1.32321e+06	1.19103e+06	684810	828873	895946
P52895	AKR1C2	Aldo-keto reductase family 1 member C2	35555.8	54956.6	33979.5	43819.3	43996	18174.2	33608.5	8751.04	6172.23	34079	7152.39	9968.16	12082.9	26964	32542.3	11013.2
A0A0A0MSS8;P42330	AKR1C3	Isoform of P42330, Aldo-keto reductase family 1 member C3;Aldo-keto reductase family 1 member C3	40922.5	55365.7	47230.1	59923.2	62501.6	27037.6	42858.9	43327.4	36416	52808.1	28791	46152.9	54021.7	25836.8	36808.4	35050.4
P51857;P51857-2	AKR1D1	3-oxo-5-beta-steroid 4-dehydrogenase;Isoform of P51857, Isoform 2 of 3-oxo-5-beta-steroid 4-dehydrogenase	NaN	41270.3	28491.8	36456.4	33613.1	14172.1	22290.3	24682	23457.5	42690.3	19322.8	27866.3	42630.6	20958.9	NaN	46168.2
H3BLU7;O43488	AKR7A2	Isoform of O43488, Aflatoxin B1 aldehyde reductase member 2 (Fragment);Aflatoxin B1 aldehyde reductase member 2	81370.2	124515	96169.9	73179.8	63626.3	83566.6	47797.2	64358.4	81134.7	78048.3	72255.3	66221.9	67005.5	123757	65464.4	59358.7
Q96B36;Q96B36-3	AKT1S1	Proline-rich AKT1 substrate 1;Isoform of Q96B36, Isoform 3 of Proline-rich AKT1 substrate 1	23659.3	22850.8	32354.7	13491	23732.7	19500.3	19431.2	22444.7	19711.8	16823.8	13595.5	33316.6	25977.7	36296.3	23927.5	21841.6
P13716	ALAD	Delta-aminolevulinic acid dehydratase	61435.8	68472.9	49009.3	19485	17028.2	48818.5	35494.8	40621.6	38222.7	36651	56203.7	32946.3	35924.6	64848.9	42964.1	38537.6
P02768	ALB	Serum albumin	27095038	23219152	22330082	24168666	25810344	23901470	18700300	16382431	27316900	21606452	15139872	26969378	25336128	37125672	30927062	25880144
F5H4B6;Q8IZ83;Q8IZ83-3	ALDH16A1	Isoform of Q8IZ83, Aldehyde dehydrogenase family 16 member A1;Aldehyde dehydrogenase family 16 member A1;Isoform of Q8IZ83, Isoform 3 of Aldehyde dehydrogenase family 16 member A1	NaN	NaN	NaN	2810.08	NaN	6513.19	NaN	NaN	3605.9	NaN	NaN	7701.95	12133.7	NaN	NaN	4445.83
P00352	ALDH1A1	Retinal dehydrogenase 1	438514	423130	428820	260985	370082	419938	317455	466006	403231	353649	270075	219970	323538	297311	220404	366205
O94788	ALDH1A2	Retinal dehydrogenase 2	14362	NaN	NaN	1.05954e+06	29241.9	307847	19588.2	27998.1	321568	333824	1.89718e+06	417829	329701	260908	136216	36113
P30837	ALDH1B1	Aldehyde dehydrogenase X, mitochondrial	76584	88877.9	127105	88546.9	83918.9	62082	77701.1	99783.4	60630.6	98838.4	101370	110106	81252.2	63864	123425	119336
O75891;O75891-3	ALDH1L1	Cytosolic 10-formyltetrahydrofolate dehydrogenase;Isoform of O75891, Isoform 3 of Cytosolic 10-formyltetrahydrofolate dehydrogenase	62539.2	75149.2	45164.8	55598.9	69484.9	76772	61252.6	130487	91469.7	118536	65255.1	62607.9	95096.4	86376.9	57395.2	162749
P05091	ALDH2	Aldehyde dehydrogenase, mitochondrial	192655	236221	347570	173615	173874	144269	183361	212568	172000	230870	209762	248653	185842	133789	267906	205704
P51648;P51648-2	ALDH3A2	Fatty aldehyde dehydrogenase;Isoform of P51648, Isoform 2 of Fatty aldehyde dehydrogenase	114534	83816.6	133793	91610.7	127285	107025	103264	68594.4	91551.9	110837	91349.5	94115.2	124171	98159.6	119776	106479
P30038	ALDH4A1	Delta-1-pyrroline-5-carboxylate dehydrogenase, mitochondrial	368934	603147	842256	302861	400731	1.06782e+06	461200	658223	420830	639288	648010	379283	631915	626725	651225	752638
P51649;P51649-2	ALDH5A1	Succinate-semialdehyde dehydrogenase, mitochondrial;Isoform of P51649, Isoform 2 of Succinate-semialdehyde dehydrogenase, mitochondrial	176939	214249	139442	92341	88064.9	178972	106746	161001	199892	257288	136057	153208	116786	111637	111880	194170
Q02252;Q02252-2	ALDH6A1	Methylmalonate-semialdehyde dehydrogenase [acylating], mitochondrial;Isoform of Q02252, Isoform 2 of Methylmalonate-semialdehyde dehydrogenase [acylating], mitochondrial	31271.1	77532.2	120070	35592.2	78223.1	100514	55047.4	74734.2	36345	77062.7	67751.3	59824.4	76642.5	59441.5	71277.9	73769.8
A0A1B0GTG2;A0A1B0GW77;P49419;P49419-2	ALDH7A1	Isoform of P49419, Alpha-aminoadipic semialdehyde dehydrogenase;Isoform of P49419, Alpha-aminoadipic semialdehyde dehydrogenase;Alpha-aminoadipic semialdehyde dehydrogenase;Isoform of P49419, Isoform 2 of Alpha-aminoadipic semialdehyde dehydrogenase	55053.1	47694.9	65550	36059.4	61367.9	72510.1	41252.6	45436.5	51623.4	45414	44591	49179.9	61428.2	31112.8	35467	47354
P49189	ALDH9A1	4-trimethylaminobutyraldehyde dehydrogenase	222936	303091	359173	150823	339360	298115	282181	194353	207544	205492	175528	165378	292199	220244	339401	240983
P04075;P04075-2	ALDOA	Fructose-bisphosphate aldolase A;Isoform of P04075, Isoform 2 of Fructose-bisphosphate aldolase A	17048496	16083766	19877236	20609158	19846100	16259763	16244226	16195169	19855312	17793284	15872412	18309864	17204878	10875570	14453757	17668086
P09972	ALDOC	Fructose-bisphosphate aldolase C	11203291	12036069	2183964	5.01347e+06	3.46795e+06	5297888	3882568	6362526	6971071	6346324	4009897	1.4932e+06	6.0154e+06	7781585	11326405	5471222
Q9BT30	ALKBH7	Alpha-ketoglutarate-dependent dioxygenase alkB homolog 7, mitochondrial	NaN	NaN	1601.59	728.143	1124.29	1978.8	1715.77	1480.33	2896.64	1637.21	2097.38	1203.27	2375.83	2344.15	3140.63	3257.2
Q96L96	ALPK3	Alpha-protein kinase 3	12806.2	7971.05	4499.05	6326.86	8609.89	9941.68	9508.57	10088.6	11157.5	8399.32	5613.64	8450.54	8432.62	19273.6	15067.4	14207.8
E9PB61;Q86V81	ALYREF	Isoform of Q86V81, THO complex subunit 4;THO complex subunit 4	11985.8	8071.28	16933.6	7212.64	10644.4	10744.8	6895.59	5309.97	8123.09	10476.3	7314.13	14187.7	14000.9	25781.4	11106.4	10406.8
P02760	AMBP	Protein AMBP	30419.2	32210.3	24151.4	21504.7	23739.3	35269.3	18322.6	56796.5	29037	15854.7	18420.1	18769.9	18898.7	30354.4	25680.3	23955.3
P23109;P23109-2	AMPD1	AMP deaminase 1;Isoform of P23109, Isoform 2 of AMP deaminase 1	334931	343167	146183	414889	416068	408331	461032	209854	335262	368059	111640	306255	299373	201323	298312	146837
C9JN86;P16157-22;P16157-23;Q6PK32	ANK1	Isoform of P16157, Ankyrin-1 (Fragment);Isoform of P16157, Isoform 22 of Ankyrin-1;Isoform of P16157, Isoform 23 of Ankyrin-1;Isoform of P16157, ANK1 protein	68539.6	56622.8	139068	103730	93639.5	106390	93850.7	83413	82184.8	64722.2	110246	66276.1	56074.5	101028	69054.3	94301.1
P16157-3	ANK1	Isoform of P16157, Isoform Er5 of Ankyrin-1	50248.2	41217.4	52665.1	60056.3	41223.6	42282.9	34291.3	27231.8	33913	31680.3	45045.5	34072	37078	42858.9	46155.4	39269.1
I6L894	ANK2	Isoform of Q01484, Ankyrin-2	12415.9	11047.8	9245.52	7717.88	10594.1	13548.7	10181.4	10798.8	13695.8	12187.9	12889.5	12627.8	13418.1	15290.6	13859.3	14604.8
Q12955-6	ANK3	Isoform of Q12955, Isoform 4 of Ankyrin-3	10684.5	NaN	NaN	NaN	NaN	NaN	NaN	NaN	NaN	NaN	NaN	NaN	NaN	NaN	NaN	NaN
Q12955;Q12955-4;Q12955-5	ANK3	Ankyrin-3;Isoform of Q12955, Isoform 2 of Ankyrin-3;Isoform of Q12955, Isoform 3 of Ankyrin-3	31541.4	34166.2	31660.1	15216	37033.8	26275.7	31694.3	34344.9	27426.3	19672.8	27823.4	17785.9	28848.8	25808	35064.6	27750.3
Q15327	ANKRD1	Ankyrin repeat domain-containing protein 1	20612.1	NaN	NaN	NaN	NaN	NaN	NaN	NaN	NaN	NaN	NaN	NaN	NaN	46988.5	9654.94	NaN
A0A0A0MRN9;Q9GZV1	ANKRD2	Isoform of Q9GZV1, Ankyrin repeat domain-containing protein 2;Ankyrin repeat domain-containing protein 2	348393	929992	1196115	1533408	1.63522e+06	982661	1.28487e+06	1.1501e+06	328777	1032359	570278	1.26928e+06	1.00584e+06	810910	357554	375449
P39687	ANP32A	Acidic leucine-rich nuclear phosphoprotein 32 family member A	51231.3	21994	40797	25086.2	40960.2	46807.3	27432.9	40472.2	60252	36145.4	41491.1	40126.5	60552.2	158962	71230.8	40084.4
Q92688;Q92688-2	ANP32B	Acidic leucine-rich nuclear phosphoprotein 32 family member B;Isoform of Q92688, Isoform 2 of Acidic leucine-rich nuclear phosphoprotein 32 family member B	13795	9688.65	NaN	NaN	5489.42	10334.4	NaN	6876.06	12758.2	NaN	11779.3	4108.07	5031.26	13168.1	16737.1	15708.9
Q9BTT0	ANP32E	Acidic leucine-rich nuclear phosphoprotein 32 family member E	24948.4	25128.1	31149.2	32113.4	31114.4	29676.4	19067.6	18061	23181.5	24017.9	16533	22125.9	22471.2	33408.4	19694.3	19404.1
P04083	ANXA1	Annexin A1	108423	65103.4	70250.8	87930.2	84574.6	72189.8	63237.2	64901.3	76002.7	55025.4	72790.2	74367.1	71272.1	112085	97734.1	66901.9
P50995;P50995-2	ANXA11	Annexin A11;Isoform of P50995, Isoform 2 of Annexin A11	81478	83859.1	63194.4	70523	68961.4	74336.1	75245	97703.7	88756	83678.2	104238	80650.2	70044.2	80207.7	80531	84537.1
P07355;P07355-2	ANXA2	Annexin A2;Isoform of P07355, Isoform 2 of Annexin A2	340603	332610	366629	327502	346667	240551	248172	181812	325426	250941	324827	278929	302169	260641	317206	223269
P12429	ANXA3	Annexin A3	29076.4	38275.9	45335.8	34673	38592	42063.8	30033.8	34236.8	26426.5	30099.8	28303.6	27502	26369.8	28286.9	23270	20392.7
P09525;Q6P452	ANXA4	Annexin A4;Isoform of P09525, Annexin	15734.3	16460.5	12911.4	28188.2	20681.5	16060.7	16518.8	15673.8	20424.2	16822.7	20136.8	17315.8	21782.3	19576.1	17593.3	12667.6
P08758	ANXA5	Annexin A5	460391	500919	374727	436938	385035	512565	541901	416910	480923	442986	362343	411420	465207	761528	574520	405356
E5RK69	ANXA6	Isoform of P08133, Annexin	13467.4	NaN	22900.3	19435.8	22649.1	19873.5	20650.3	19442.3	16998.6	25058.8	20227.5	17848.5	24211.9	19727.9	23464.3	18562.1
P08133	ANXA6	Annexin A6	289401	296834	294499	291066	385247	416592	346054	266774	265393	282136	368532	271997	377889	279094	354720	268723
P20073;P20073-2	ANXA7	Annexin A7;Isoform of P20073, Isoform 2 of Annexin A7	125421	152720	163198	137904	186993	185733	153526	134146	112757	141108	117348	160302	158183	129366	115503	119815
Q16853	AOC3	Membrane primary amine oxidase	113759	121516	109622	102060	108129	102065	89903	71908.6	125229	75392.9	99978.4	87591.6	106467	102804	108150	72080.1
E7ENJ6;K7EJL1;Q9BXS5;Q9BXS5-2	AP1M1	Isoform of Q9BXS5, AP-1 complex subunit mu-1;Isoform of Q9BXS5, AP-1 complex subunit mu-1;AP-1 complex subunit mu-1;Isoform of Q9BXS5, Isoform 2 of AP-1 complex subunit mu-1	14245330	10512874	10710147	11219117	10687270	13800975	16904702	18586870	6760585	13978663	21744342	12487262	12818772	7174597	10574126	19256314
O95782;O95782-2	AP2A1	AP-2 complex subunit alpha-1;Isoform of O95782, Isoform B of AP-2 complex subunit alpha-1	7148.17	67090.6	53009.6	42623.7	33878	12403.6	16838.7	8501.81	42010.4	30331.2	7494.24	30407.3	34431.5	11648.5	39334.9	30248.8
O94973;O94973-2	AP2A2	AP-2 complex subunit alpha-2;Isoform of O94973, Isoform 2 of AP-2 complex subunit alpha-2	4590.34	3181.71	NaN	4380.26	5934.92	4437.46	4313.98	6070.68	5781.19	4600.13	3946.37	NaN	6277.34	4159.19	5007.91	13702.5
P63010;P63010-2;P63010-3	AP2B1	AP-2 complex subunit beta;Isoform of P63010, Isoform 2 of AP-2 complex subunit beta;Isoform of P63010, Isoform 3 of AP-2 complex subunit beta	16389.9	10876.3	12518.4	11181.3	11204.5	12836.2	9309.91	11965.1	15434.3	13021.2	12039.8	13486.1	12912.5	12930.1	17003.1	11902.5
B1ALD2;Q9Y6B7;Q9Y6B7-2	AP4B1	Isoform of Q9Y6B7, AP-4 complex subunit beta-1 (Fragment);AP-4 complex subunit beta-1;Isoform of Q9Y6B7, Isoform 2 of AP-4 complex subunit beta-1	91439.8	71981.1	56661.7	NaN	NaN	81131.2	57842.8	106288	76983.8	NaN	143379	16581.8	70261.8	92275.5	111060	109381
Q9UPM8;Q9UPM8-2	AP4E1	AP-4 complex subunit epsilon-1;Isoform of Q9UPM8, Isoform 2 of AP-4 complex subunit epsilon-1	201901	NaN	139445	180297	208815	139827	163480	161560	202352	174421	149868	184566	179725	101007	232357	237579
P02743	APCS	Serum amyloid P-component	21933.1	25353.8	14798.1	36176	26624.3	31531.2	20320.8	13854.3	24496.8	23041.6	14104.5	21340.6	24291.4	24175.1	21471.3	23886.3
C9JIF9;P13798	APEH	Isoform of P13798, Acylamino-acid-releasing enzyme;Acylamino-acid-releasing enzyme	56582.6	62641.6	58681.6	55769.2	56616.8	61065.5	66348	61562.9	73276.4	56158.1	58745.1	61887.1	77271.6	45565.1	64369.1	85584.7
P27695	APEX1	DNA-(apurinic or apyrimidinic site) lyase	32095.7	33420.6	28786.6	18644.4	28610.9	38707.9	21114.2	31705.1	40218	24847.7	26055.7	24299.3	34871.3	26073.6	31230.9	30602.8
G3V1C3;Q9BZZ5;Q9BZZ5-2;Q9BZZ5-3	API5	Isoform of Q9BZZ5, Apoptosis inhibitor 5;Apoptosis inhibitor 5;Isoform of Q9BZZ5, Isoform 2 of Apoptosis inhibitor 5;Isoform of Q9BZZ5, Isoform 3 of Apoptosis inhibitor 5	7448.1	NaN	38021.9	11051.4	36911.4	3227.28	1010.67	NaN	17996.8	21108.2	12108.8	13486	NaN	2307.38	4247.56	10046.8
Q96GX9	APIP	Methylthioribulose-1-phosphate dehydratase	24328.9	21596.7	11730.2	11441.5	15162.1	17580.9	11272.3	12384.5	17994.6	9987.32	7581.9	10047.7	10273.2	7963.05	15242.2	17246.9
Q9HDC9;Q9HDC9-2	APMAP	Adipocyte plasma membrane-associated protein;Isoform of Q9HDC9, Isoform 2 of Adipocyte plasma membrane-associated protein	11088.3	10951.2	17589.4	6906.53	16423.9	7090.95	8193.34	8924.87	11710	11615	6188.35	10528.7	7895.81	8560.41	12686.2	5901.47
P02647	APOA1	Apolipoprotein A-I	2204801	3.10553e+06	2.48712e+06	3.11808e+06	3.30181e+06	3233674	1.56005e+06	1.41651e+06	2.08594e+06	1.83649e+06	1.61503e+06	2182731	2.65627e+06	5.94512e+06	2.995e+06	1.95527e+06
P02652;V9GYG9;V9GYM3	APOA2	Apolipoprotein A-II;Isoform of P02652, Apolipoprotein A-II (Fragment);Isoform of P02652, Apolipoprotein A-II	848356	1.02075e+06	638348	856238	962059	838565	514501	479684	698362	646350	427239	698812	1.10984e+06	2105670	1.292e+06	978124
P06727	APOA4	Apolipoprotein A-IV	122770	165762	154861	99004	177829	186266	68896.2	91616.4	85001	79499.9	103936	91395.7	124854	373156	143961	151925
P04114	APOB	Apolipoprotein B-100	76675.8	66204.8	58931.6	46997.1	57801.2	54182.9	42879.5	23592.6	54732.6	25600	50352.8	30670.2	61694.2	55848.2	63998	38247
Q9Y235	APOBEC2	C->U-editing enzyme APOBEC-2	1.56975e+06	2.80875e+06	1.60834e+06	1.753e+06	1.92293e+06	1659194	1.67913e+06	1.67316e+06	1.2258e+06	1397233	1.31791e+06	1.42508e+06	1.79571e+06	1.50055e+06	1.62247e+06	1.62851e+06
K7ERI9;P02654	APOC1	Isoform of P02654, Apolipoprotein C-I (Fragment);Apolipoprotein C-I	126008	73849.4	70608.9	53720.9	94410.4	75641.6	32983	30761.5	84685.6	21053.6	79629.2	68121.2	102609	215269	108354	91394.5
B0YIW2;P02656	APOC3	Isoform of P02656, Apolipoprotein C-III;Apolipoprotein C-III	200926	354164	394680	676129	734974	273665	176247	117541	132195	136220	96118.3	500258	190234	246650	270472	192931
A0A024R0T9;K7ER74;P02655;Q6P163	APOC4-APOC2;APOC4-APOC2;APOC2;APOC2	Isoform of K7ER74, Apolipoprotein C-II isoform 1;APOC4-APOC2 readthrough (NMD candidate);Apolipoprotein C-II;Isoform of P02655, APOC2 protein	35061.8	16298.2	NaN	25232.2	10661.6	11147.1	6569.98	4885.47	21294	7476.75	12441.1	8532.51	11316.8	29763.7	16625.5	9517.93
C9JF17;P05090	APOD	Isoform of P05090, Apolipoprotein D (Fragment);Apolipoprotein D	96528.1	92048.1	94519.9	87338.9	63167.1	104785	54808.7	94599.8	102831	67056.7	45115.9	94921.8	55580.7	105897	81223.3	84892.8
P02649	APOE	Apolipoprotein E	56477.4	33707.3	39127.2	42726.9	41927.6	25648.7	36730.2	17232.3	42226	21268.5	27598.9	30271.1	43980.4	58903.5	33866.6	24994
Q13790	APOF	Apolipoprotein F	NaN	NaN	NaN	NaN	NaN	NaN	NaN	NaN	NaN	NaN	NaN	NaN	1295.63	4226.89	NaN	NaN
P02749	APOH	Beta-2-glycoprotein 1	83414.3	78227.4	49264.5	71702	62054.8	83749.2	44755.9	49073.1	77207	54051.8	64739.5	81632.1	111396	98805.3	80996.4	90541.2
O14791;O14791-2;O14791-3	APOL1	Apolipoprotein L1;Isoform of O14791, Isoform 2 of Apolipoprotein L1;Isoform of O14791, Isoform 3 of Apolipoprotein L1	24447.8	16375.2	22942.2	31625.4	20227.6	18923.4	17438.7	14139.7	19323.3	11541.2	19030.4	16182.1	14897.1	15623	28142.2	23104.1
J3KQL8	APOL2	Isoform of Q9BQE5, Apolipoprotein L2	7156.34	8000.26	NaN	4091.19	6297.41	5986.56	7133.96	3527.79	10487.5	5432.37	10839.2	10945.1	5978.05	18469.7	8552.68	11463.3
H7C1U8;Q9BUR5	APOO	Isoform of Q9BUR5, MICOS complex subunit (Fragment);MICOS complex subunit MIC26	204307	167262	199985	153114	188356	140828	154282	196675	237241	204550	168418	149242	128805	138157	136769	194979
A0A087WUX8;A0A087WYF7;Q6UXV4	APOOL	Isoform of Q6UXV4, MICOS complex subunit;Isoform of Q6UXV4, MICOS complex subunit;MICOS complex subunit MIC27	122382	92088.6	98401.9	70353	63792.3	124696	86127.6	135449	171471	138461	133074	90905	91687.1	98837	92651.4	138238
Q9UKG1	APPL1	DCC-interacting protein 13-alpha	25740.8	12327.6	16901	27247.2	21950.6	21781.8	20333.8	26397	30090	18792.8	19201.5	15999.3	27223.8	39719.1	25478.1	27181
H3BQZ9;P07741	APRT	Isoform of P07741, Adenine phosphoribosyltransferase;Adenine phosphoribosyltransferase	132259	130873	145458	129916	130711	76237.2	101713	102279	117974	100580	101818	166760	136640	87791.9	124780	112081
P55087;P55087-2;V9PBN7	AQP4	Aquaporin-4;Isoform of P55087, Isoform 1 of Aquaporin-4;Isoform of P55087, Aquaporin 4 isoform delta4	37865.4	24850.5	42842.6	30910.1	NaN	41360.4	NaN	22981.7	21325.5	33075.1	NaN	33854.7	1351.65	20092.3	16927.4	36510
B0YIW6;P48444	ARCN1	Isoform of P48444, Archain 1, isoform CRA_a;Coatomer subunit delta	7617.47	3762.56	6919.15	4199.98	8259.42	6045.52	7633.24	4909.04	8130.89	10312.5	8649.59	5893.72	7673.31	10760.1	8894.38	8254.85
P84077	ARF1	ADP-ribosylation factor 1	175982	149007	167240	183390	165197	110528	99856.5	90259.1	155827	149477	136057	156985	126623	113775	93325.1	152479
C9JPM4;P18085	ARF4	Isoform of P18085, ADP-ribosylation factor 4 (Fragment);ADP-ribosylation factor 4	9231.89	12423.3	1601.19	3390.86	2272	6694.28	5780.41	7024.19	7912.02	3150.69	8574.18	4163.2	8778.57	10668.3	11871.6	8171.97
P84085	ARF5	ADP-ribosylation factor 5	NaN	12111.8	18061.3	14372.5	17656.9	17645.5	9628.44	13299.1	19351.4	19207	19414.4	13758.8	17513.9	23997.3	25662.2	20702.9
Q07960	ARHGAP1	Rho GTPase-activating protein 1	8150.89	NaN	106475	11061.8	9178.85	7908.72	7620.76	55687.8	57871.3	29646.1	11751.3	26110.1	35878.3	35293.2	9813.77	23092.8
Q8N392;Q8N392-2	ARHGAP18	Rho GTPase-activating protein 18;Isoform of Q8N392, Isoform 2 of Rho GTPase-activating protein 18	NaN	NaN	9983.47	NaN	9416.2	NaN	NaN	NaN	NaN	7230.83	NaN	9750.11	1281.48	NaN	NaN	NaN
P52565	ARHGDIA	Rho GDP-dissociation inhibitor 1	296784	271697	256188	161268	202885	312820	176304	182656	220373	148152	165124	173232	168521	307406	182797	115972
P52566	ARHGDIB	Rho GDP-dissociation inhibitor 2	22463.5	20038.1	26085.9	17427.8	27669.9	24601.2	18781.5	14888.8	28688.4	24378.8	18949.7	25939.3	31581.7	26414.5	22570	22736.2
Q5VXI4;Q9HCE6;Q9HCE6-2;Q9HCE6-3;Q9HCE6-4	ARHGEF10L	Isoform of Q9HCE6, Rho guanine nucleotide exchange factor 10-like protein;Rho guanine nucleotide exchange factor 10-like protein;Isoform of Q9HCE6, Isoform 2 of Rho guanine nucleotide exchange factor 10-like protein;Isoform of Q9HCE6, Isoform 3 of Rho guanine nucleotide exchange factor 10-like protein;Isoform of Q9HCE6, Isoform 4 of Rho guanine nucleotide exchange factor 10-like protein	NaN	NaN	2003.22	NaN	1889.36	2375.72	1479.11	1938.33	2570.22	2602.47	2318.58	2100.19	2520.99	NaN	NaN	3383.63
B1ALK7;Q14155-1;Q14155-5	ARHGEF7	Isoform of Q14155, Rho guanine nucleotide exchange factor 7;Isoform of Q14155, Isoform 1 of Rho guanine nucleotide exchange factor 7;Isoform of Q14155, Isoform 5 of Rho guanine nucleotide exchange factor 7	3032.36	2101.04	NaN	NaN	962.906	NaN	6618	7995.43	6297.11	10588.4	4065.51	4236.54	NaN	NaN	7485.34	2316.39
O95376	ARIH2	E3 ubiquitin-protein ligase ARIH2	9785.11	7091.57	8358.25	7822.61	22239.4	22210.2	6063.7	10525.6	10009.5	8985.94	6894.62	9702.42	9322.04	5305.12	8551.32	NaN
P36404	ARL2	ADP-ribosylation factor-like protein 2	29120.4	37085.9	39205.6	36203.7	48348.8	39824.2	30221.6	NaN	40082.3	NaN	53008.6	52920.2	NaN	30641.5	35586.5	36662.4
H3BU49;Q9Y2Y0;Q9Y2Y0-2	ARL2BP	Isoform of Q9Y2Y0, ADP-ribosylation factor-like protein 2-binding protein;ADP-ribosylation factor-like protein 2-binding protein;Isoform of Q9Y2Y0, Isoform 2 of ADP-ribosylation factor-like protein 2-binding protein	NaN	NaN	NaN	NaN	NaN	NaN	6709.07	NaN	10803	NaN	NaN	9078.86	NaN	16688.4	12828.7	11745.8
P36405	ARL3	ADP-ribosylation factor-like protein 3	17131.4	15223.5	NaN	1232.26	5498.12	2890.93	1146.29	24190	14156.5	12264.9	13040.4	2856.29	4943.77	13542.2	19843.3	10161.8
A0A0C4DG62;F5GYV5;F5H7X4;F8WCT1;H7BZV4;Q66PJ3;Q66PJ3-2;Q66PJ3-3;Q66PJ3-4;Q66PJ3-7	ARL6IP4	Isoform of Q66PJ3, ADP-ribosylation factor-like protein 6-interacting protein 4;Isoform of Q66PJ3, ADP-ribosylation factor-like protein 6-interacting protein 4 (Fragment);Isoform of Q66PJ3, ADP-ribosylation factor-like protein 6-interacting protein 4 (Fragment);Isoform of Q66PJ3, ADP-ribosylation factor-like protein 6-interacting protein 4;Isoform of Q66PJ3, ADP-ribosylation factor-like protein 6…	NaN	NaN	5344.32	NaN	NaN	NaN	NaN	3145.03	NaN	5332.45	3352.81	NaN	4792.81	NaN	3073.88	2969.82
O75915	ARL6IP5	PRA1 family protein 3	207690	190071	226337	176509	156103	145744	160023	158814	163290	191810	132457	166085	166268	149186	168732	224264
Q96BM9	ARL8A	ADP-ribosylation factor-like protein 8A	59320.9	66592.4	59839.7	58279.9	59623	54947.6	49345.4	41440.9	54540.6	45203.9	68771.8	47732.8	53038.7	42164.4	44637.3	47683.6
Q9H993	ARMT1	Protein-glutamate O-methyltransferase	30447.3	30945	37531	24196.5	39253.9	29165.2	27109	31182.8	35902.1	32439.2	28712.2	32118.9	34322	31281.6	32722.9	31011.7
O15144	ARPC2	Actin-related protein 2/3 complex subunit 2	9207.9	NaN	11789.3	11015.9	9876.97	8147.57	5309.3	7029.77	14764.9	10334.2	8664.58	10151.6	14562.4	9288.9	11876.3	12704
O15145	ARPC3	Actin-related protein 2/3 complex subunit 3	21412.7	16224.4	NaN	12881.8	16350.2	20673.8	14949.9	13342.1	24713.4	18236.6	19727.9	24055.2	22348.4	21407	24133.5	20259
A0A0A6YYG9;F8WCF6;F8WDD7;P59998;P59998-2;P59998-3	ARPC4-TTLL3;ARPC4-TTLL3;ARPC4;ARPC4;ARPC4;ARPC4	Protein ARPC4-TTLL3;Isoform of A0A0A6YYG9, Actin-related protein 2/3 complex subunit 4;Isoform of P59998, Actin-related protein 2/3 complex subunit 4;Actin-related protein 2/3 complex subunit 4;Isoform of P59998, Isoform 2 of Actin-related protein 2/3 complex subunit 4;Isoform of P59998, Isoform 3 of Actin-related protein 2/3 complex subunit 4	40567.1	45208.3	34710.2	NaN	50836.7	13688	NaN	14064.4	30369.3	39925.7	23052.5	22404.1	38364.6	22672.7	41272.1	22673.8
O15511	ARPC5	Actin-related protein 2/3 complex subunit 5	10487.7	5.18796	4729.02	NaN	12320.2	3373.16	8848.52	6795.31	10612.5	10230.9	5132.36	5826.46	6056.81	14407.4	11423	18281
Q9BPX5	ARPC5L	Actin-related protein 2/3 complex subunit 5-like protein	26446.7	15672.7	19600.4	NaN	20007.2	17118.4	17442.6	37115.3	35500.1	24708.2	44742.5	22759.5	373720	33067.5	24910.9	26879.2
H3BMD8;P56211	ARPP19	Isoform of P56211, cAMP-regulated phosphoprotein 19;cAMP-regulated phosphoprotein 19	231931	267754	211179	198972	196543	275822	184590	164433	203301	154236	113920	158920	207956	402264	195225	109398
Q13508	ART3	Ecto-ADP-ribosyltransferase 3	47303.4	50356.3	61362.7	26149.1	55284.4	66605.6	33374.4	43016.3	27614.6	31769.7	22121.6	18280.4	30623.6	43431	34473	33745.1
A0A1B0GTM3;A0A1B0GTZ5;A0A1B0GUA4;A0A1B0GUH5;A0A1B0GW68;E7EMM4;Q13510;Q13510-2	ASAH1	Isoform of Q13510, Acid ceramidase;Isoform of Q13510, Acid ceramidase;Isoform of Q13510, Acid ceramidase;Isoform of Q13510, Acid ceramidase;Isoform of Q13510, Acid ceramidase;Isoform of Q13510, Acid ceramidase;Acid ceramidase;Isoform of Q13510, Isoform 2 of Acid ceramidase	28158.4	31093.2	34719.4	24698	33250	26930.9	21524.3	28125.1	34705.7	22189.5	34821.5	28508.2	30783.3	38580.7	27765.1	21923.9
Q8WXI3;Q8WXI3-2;Q8WXI3-3	ASB10	Ankyrin repeat and SOCS box protein 10;Isoform of Q8WXI3, Isoform 2 of Ankyrin repeat and SOCS box protein 10;Isoform of Q8WXI3, Isoform 3 of Ankyrin repeat and SOCS box protein 10	351968	474548	202820	304695	200463	330624	239552	302638	300434	207264	280786	238910	226198	NaN	358955	391239
G3V3P8;Q96Q27-2	ASB2	Isoform of Q96Q27, Ankyrin repeat and SOCS box protein 2 (Fragment);Isoform of Q96Q27, Isoform 2 of Ankyrin repeat and SOCS box protein 2	NaN	NaN	3233.87	NaN	NaN	NaN	4240.8	4325.56	NaN	NaN	NaN	2438.17	NaN	NaN	NaN	NaN
A0A087WXS7;O43681	ASNA1	Isoform of O43681, ATPase ASNA1;ATPase ASNA1	44372	51584.9	91228.6	67144.8	160405	108564	38194.5	37542.2	83894	145460	40397.2	90772.8	57808	90372.3	52762.7	56468
P45381	ASPA	Aspartoacylase	17138.4	18078.9	12476.3	13664.2	12510.6	18305.4	16278.8	9612.54	21891.1	20313.9	13819.2	16910.5	14638.9	15515.6	19991.6	20155.6
Q12797	ASPH	Aspartyl/asparaginyl beta-hydroxylase	5959.5	4676.02	19085.2	7662.56	20793.7	7146.81	15419.8	5793.98	15188.2	17980.6	6210.1	19408.1	23093.1	9623.5	7736	17165.4
Q12797-3;Q12797-4	ASPH	Isoform of Q12797, Isoform 3 of Aspartyl/asparaginyl beta-hydroxylase;Isoform of Q12797, Isoform 4 of Aspartyl/asparaginyl beta-hydroxylase	403644	395290	473210	599714	571378	501887	436328	400815	471842	533584	368025	571376	602824	628742	452723	554399
Q9BXN1	ASPN	Asporin	57465.4	38114.2	26189.3	18534.2	38383.8	40218	24502.9	16085.2	28967	30616.3	23920.8	21209.7	17425.9	33840.9	26358.4	11994.1
Q9BZE9;Q9BZE9-2;Q9BZE9-3	ASPSCR1	Tether containing UBX domain for GLUT4;Isoform of Q9BZE9, Isoform 2 of Tether containing UBX domain for GLUT4;Isoform of Q9BZE9, Isoform 3 of Tether containing UBX domain for GLUT4	NaN	NaN	NaN	17915.5	NaN	NaN	8732.04	1796.05	13508.6	11123.3	NaN	14050.8	2975.18	22079.4	NaN	NaN
P00966	ASS1	Argininosuccinate synthase	4303.21	6249.85	NaN	NaN	7211.61	23721.3	8459.57	7128.02	NaN	18166.2	53233.3	17367.5	8888.04	7944.35	21480.1	24678.3
Q8NBU5	ATAD1	ATPase family AAA domain-containing protein 1	14629.8	12690.8	5491.76	7295.51	8951.99	12161.7	11452.2	15828.3	24112	17029.5	18698.8	15094.7	17088.2	14421.6	16227.1	22804.3
Q9ULI0;Q9ULI0-2	ATAD2B	ATPase family AAA domain-containing protein 2B;Isoform of Q9ULI0, Isoform 2 of ATPase family AAA domain-containing protein 2B	3934.1	94738.7	5954.51	6462.56	8050.04	7001.96	1530.51	1626.02	10092.8	11912.4	1948.66	11284.3	9318.06	NaN	8992.73	11229.1
H0Y2W2;Q9NVI7;Q9NVI7-2;Q9NVI7-3	ATAD3A	Isoform of Q9NVI7, ATPase family AAA domain-containing protein 3A (Fragment);ATPase family AAA domain-containing protein 3A;Isoform of Q9NVI7, Isoform 2 of ATPase family AAA domain-containing protein 3A;Isoform of Q9NVI7, Isoform 3 of ATPase family AAA domain-containing protein 3A	24926.8	20603.3	5664.43	8888.89	2579.8	15107.8	8009.72	14762.9	18457.7	15137.4	13501.5	12943	15651	5981.72	16679.8	15350.1
B4E107;F5GXE4;O95260-2	ATE1	Isoform of O95260, Arginyl-tRNA--protein transferase 1;Isoform of O95260, Arginyl-tRNA--protein transferase 1;Isoform of O95260, Isoform ATE1-2 of Arginyl-tRNA--protein transferase 1	11232.3	10414.5	14742.6	12195.8	13895.5	19287.6	20209.5	13520.2	13533.5	13365.3	12560	19233.1	16059.6	12589.1	14741.2	15045.2
A0A0A0MRJ2;P18847;P18847-2;P18847-3;P18847-4;P18847-5;Q5VTZ4	ATF3	Isoform of P18847, Cyclic AMP-dependent transcription factor ATF-3 (Fragment);Cyclic AMP-dependent transcription factor ATF-3;Isoform of P18847, Isoform 2 of Cyclic AMP-dependent transcription factor ATF-3;Isoform of P18847, Isoform 3 of Cyclic AMP-dependent transcription factor ATF-3;Isoform of P18847, Isoform 4 of Cyclic AMP-dependent transcription factor ATF-3;Isoform of P18847, Isoform 5 of C…	43706.6	71214.4	47858.2	58696.2	73574.3	64083.9	63639.9	53906.5	25298.9	73203.1	37870.2	81343.7	99860.4	135290	66921.2	106129
Q9NT62	ATG3	Ubiquitin-like-conjugating enzyme ATG3	19579.1	15120.4	19619.6	23606.9	19556.2	20761.7	16274	15759.1	28881.1	19668.9	21460	13965.9	24111.6	26826.3	21566.9	27624.2
A0A0A0MT61;G5E979;H7BYM2;Q8WYN0;Q8WYN0-3;Q8WYN0-5	ATG4A	Isoform of Q8WYN0, Cysteine protease (Fragment);Isoform of Q8WYN0, Cysteine protease;Isoform of Q8WYN0, Cysteine protease (Fragment);Cysteine protease ATG4A;Isoform of Q8WYN0, Isoform 3 of Cysteine protease ATG4A;Isoform of Q8WYN0, Isoform 4 of Cysteine protease ATG4A	NaN	NaN	NaN	NaN	NaN	NaN	1238.85	1677.32	452.563	1116.37	3035.01	917.644	NaN	1104.19	2628.31	1078.32
C9JIK8;Q9Y4P1;Q9Y4P1-2;Q9Y4P1-6	ATG4B	Isoform of Q9Y4P1, Cysteine protease (Fragment);Cysteine protease ATG4B;Isoform of Q9Y4P1, Isoform 2 of Cysteine protease ATG4B;Isoform of Q9Y4P1, Isoform 6 of Cysteine protease ATG4B	NaN	NaN	NaN	NaN	NaN	NaN	14787.3	NaN	11240.7	17017.2	11631.5	9469.57	NaN	NaN	NaN	NaN
P31939	ATIC	Bifunctional purine biosynthesis protein PURH	107196	160864	189122	128320	147325	116054	116801	94095.4	125210	124688	104315	99716.9	121598	77479.5	77325.5	92692.8
Q8NHH9;Q8NHH9-3;Q8NHH9-5	ATL2	Atlastin-2;Isoform of Q8NHH9, Isoform 3 of Atlastin-2;Isoform of Q8NHH9, Isoform 5 of Atlastin-2	31398.8	23030.3	39158.8	40256.7	42326.2	32258.2	28122.6	33969.9	25727.6	34550.4	25299.6	28592.3	4845.42	11139.8	28258	31644.7
F5H6I7;Q6DD88	ATL3	Isoform of Q6DD88, Atlastin-3;Atlastin-3	NaN	NaN	10716.2	NaN	NaN	291968	304641	384879	6023.73	9607.88	4676.59	NaN	NaN	NaN	213536	235540
E5RIM7;O00244	ATOX1	Isoform of O00244, Copper transport protein ATOX1;Copper transport protein ATOX1	81740.5	88503.2	76604.8	84432.8	90652.9	90403.9	73029.7	63854.2	96098.9	69253.5	58940.2	74557.9	83283.7	116775	72090.5	57682.3
P05023;P05023-3;P05023-4	ATP1A1	Sodium/potassium-transporting ATPase subunit alpha-1;Isoform of P05023, Isoform 3 of Sodium/potassium-transporting ATPase subunit alpha-1;Isoform of P05023, Isoform 4 of Sodium/potassium-transporting ATPase subunit alpha-1	63884.5	44138.8	57781.5	48111.4	37519.3	60250.5	33522.3	16784.3	48139.5	35818.9	47639.9	34165.3	64366.8	50248.1	41986.6	60002.2
B1AKY9;P50993	ATP1A2	Isoform of P50993, Sodium/potassium-transporting ATPase subunit alpha;Sodium/potassium-transporting ATPase subunit alpha-2	364631	333740	377938	297401	406112	384164	333963	325164	363514	413213	288469	238613	376408	279219	318273	386290
Q13733	ATP1A4	Sodium/potassium-transporting ATPase subunit alpha-4	34982.3	178454	80227.9	123963	119677	113123	130824	95066	131703	100271	197378	150386	176499	144413	129396	129767
P05026;P05026-2	ATP1B1	Sodium/potassium-transporting ATPase subunit beta-1;Isoform of P05026, Isoform 2 of Sodium/potassium-transporting ATPase subunit beta-1	273211	181718	254902	151786	224067	224262	149011	136644	165115	198246	119531	284470	210536	137319	157943	179566
B7ZKW0;Q9UN42;Q9UN42-2	ATP1B4	Isoform of Q9UN42, Sodium/potassium-transporting ATPase subunit beta;Protein ATP1B4;Isoform of Q9UN42, Isoform B of Protein ATP1B4	NaN	NaN	4965.14	3877.12	4204.4	44845.6	NaN	6187.29	NaN	6493.49	258.633	6496.93	NaN	29500.9	7375.34	39998.7
O14983;O14983-2	ATP2A1	Sarcoplasmic/endoplasmic reticulum calcium ATPase 1;Isoform of O14983, Isoform SERCA1A of Sarcoplasmic/endoplasmic reticulum calcium ATPase 1	2390453	1.81712e+06	1.99675e+06	2612752	3454000	1.89184e+06	2.37134e+06	2.93414e+06	2563095	2.69044e+06	2.20563e+06	2132071	2.95501e+06	1.34241e+06	2.0519e+06	3195541
P16615-2	ATP2A2	Isoform of P16615, Isoform 2 of Sarcoplasmic/endoplasmic reticulum calcium ATPase 2	3.03261e+06	2.33375e+06	2.54555e+06	2.90614e+06	3.68291e+06	2.7595e+06	3565456	3.64524e+06	3.31638e+06	3.20925e+06	3.08518e+06	3019629	3.22628e+06	2.15223e+06	3.30375e+06	4105338
Q93084;Q93084-2;Q93084-3;Q93084-4;Q93084-5;Q93084-6;Q93084-7	ATP2A3	Sarcoplasmic/endoplasmic reticulum calcium ATPase 3;Isoform of Q93084, Isoform SERCA3A of Sarcoplasmic/endoplasmic reticulum calcium ATPase 3;Isoform of Q93084, Isoform SERCA3C of Sarcoplasmic/endoplasmic reticulum calcium ATPase 3;Isoform of Q93084, Isoform SERCA3G of Sarcoplasmic/endoplasmic reticulum calcium ATPase 3;Isoform of Q93084, Isoform SERCA3E of Sarcoplasmic/endoplasmic reticulum calc…	NaN	24710	24824	15107.1	26322.8	20206.1	10412.4	15817.5	NaN	11170.1	NaN	11283.8	15942.7	30690.7	NaN	12345.4
P20020;P20020-2;P20020-3;P20020-4;P20020-5;P20020-6	ATP2B1	Plasma membrane calcium-transporting ATPase 1;Isoform of P20020, Isoform A of Plasma membrane calcium-transporting ATPase 1;Isoform of P20020, Isoform B of Plasma membrane calcium-transporting ATPase 1;Isoform of P20020, Isoform C of Plasma membrane calcium-transporting ATPase 1;Isoform of P20020, Isoform E of Plasma membrane calcium-transporting ATPase 1;Isoform of P20020, Isoform K of Plasma me…	20525.9	24598.8	28139	37517.9	38313.2	35159.4	32868.4	31459.4	34914.1	31079.7	29281.1	24601.5	36201.5	27040.4	17279.2	32279.5
H0Y7S3;Q01814;Q01814-2;Q01814-3;Q01814-4;Q01814-5;Q01814-6;Q01814-7;Q01814-8	ATP2B2	Isoform of Q01814, Plasma membrane calcium-transporting ATPase 2 (Fragment);Plasma membrane calcium-transporting ATPase 2;Isoform of Q01814, Isoform WA of Plasma membrane calcium-transporting ATPase 2;Isoform of Q01814, Isoform YA of Plasma membrane calcium-transporting ATPase 2;Isoform of Q01814, Isoform ZA of Plasma membrane calcium-transporting ATPase 2;Isoform of Q01814, Isoform YB of Plasma …	NaN	5382.22	NaN	NaN	9852.81	NaN	NaN	NaN	NaN	NaN	NaN	NaN	NaN	NaN	NaN	NaN
P23634;P23634-6;P23634-7;P23634-8	ATP2B4	Plasma membrane calcium-transporting ATPase 4;Isoform of P23634, Isoform XB of Plasma membrane calcium-transporting ATPase 4;Isoform of P23634, Isoform ZB of Plasma membrane calcium-transporting ATPase 4;Isoform of P23634, Isoform ZD of Plasma membrane calcium-transporting ATPase 4	9794.54	16274.3	14782.6	9182.79	10877.7	10802.3	9451.73	7944.4	11538.2	8650.62	7328.08	12413.8	10750.8	3144.7	9559.56	8281.92
P25705	ATP5A1	ATP synthase subunit alpha, mitochondrial	7199961	6780020	6.04384e+06	4.30125e+06	4.05918e+06	7.22192e+06	4.86403e+06	7.75838e+06	9777710	7.39319e+06	7.35782e+06	6849178	5.5198e+06	5615478	8.35198e+06	8946984
P06576	ATP5B	ATP synthase subunit beta, mitochondrial	10663626	10216228	9135430	6597823	6.42328e+06	10356993	7756631	11431146	13048814	9862858	10553163	9307866	8251537	8.21255e+06	9979710	11229722
P36542;P36542-2	ATP5C1	ATP synthase subunit gamma, mitochondrial;Isoform of P36542, Isoform Heart of ATP synthase subunit gamma, mitochondrial	415362	391250	234040	236585	147311	250749	276823	460594	586160	448472	482285	381209	265694	254865	387681	365573
P30049	ATP5D	ATP synthase subunit delta, mitochondrial	1.46464e+06	1429160	1.72574e+06	1261036	1.09867e+06	1.75725e+06	1.26922e+06	1.59187e+06	2238308	2.14505e+06	1.45425e+06	2.37958e+06	1721071	2.15582e+06	1.72836e+06	2.28597e+06
P24539	ATP5F1	ATP synthase F(0) complex subunit B1, mitochondrial	336257	270339	300358	221856	184434	261162	232248	356073	468421	368223	360049	406094	244186	187377	292430	403279
O75947	ATP5H	ATP synthase subunit d, mitochondrial	2385982	2.66855e+06	2.93652e+06	2.0454e+06	1.54036e+06	1.97463e+06	2.15187e+06	2183232	3.20035e+06	3.05421e+06	2.48902e+06	3.07622e+06	2.43492e+06	3480657	2.50255e+06	2.51139e+06
P56385	ATP5I	ATP synthase subunit e, mitochondrial	581168	587845	522310	464012	295685	520502	539312	563522	741098	668906	978307	611195	485145	679353	670675	727145
P18859;P18859-2	ATP5J	ATP synthase-coupling factor 6, mitochondrial;Isoform of P18859, Isoform 2 of ATP synthase-coupling factor 6, mitochondrial	1.37102e+06	1.58164e+06	1381203	914190	788926	1.51362e+06	907773	1.20525e+06	1.79137e+06	1202454	1.08382e+06	1273137	1.07468e+06	2.50408e+06	1.29575e+06	1.58301e+06
P56134;P56134-3	ATP5J2	ATP synthase subunit f, mitochondrial;Isoform of P56134, Isoform 3 of ATP synthase subunit f, mitochondrial	519072	436148	452649	456685	411192	394380	412820	550438	685155	697157	656515	494723	337402	287736	408134	472008
E9PN17;O75964	ATP5L	Isoform of O75964, ATP synthase subunit g, mitochondrial;ATP synthase subunit g, mitochondrial	293607	258478	540823	153064	536088	271910	229072	323389	440230	365623	375578	691888	236676	210622	314566	434923
P48047	ATP5O	ATP synthase subunit O, mitochondrial	548253	432382	743956	391941	403906	435122	449516	667805	828419	844635	766201	819551	412566	454203	586930	669633
Q99766	ATP5S	ATP synthase subunit s, mitochondrial	49395.6	45572.7	38602.6	48475.5	25707.4	42138.1	35165.4	45863.2	45324.5	32930	51649.4	37769.7	49913.5	38402.7	54285.5	35658.7
P38606;P38606-2	ATP6V1A	V-type proton ATPase catalytic subunit A;Isoform of P38606, Isoform 2 of V-type proton ATPase catalytic subunit A	11359.2	7820.34	10839.3	5482.79	9890.18	8334.81	8982.83	7414.75	10320.2	8081.36	8114.42	6285.99	8190.13	9472.57	11038.8	9741.4
P21281	ATP6V1B2	V-type proton ATPase subunit B, brain isoform	18779.5	16319	16662	11726.2	13073.9	11467.1	14382.4	10943.3	17074.3	16963.4	14246.3	15827.9	17821.6	12930.9	14890.8	17592.9
P36543	ATP6V1E1	V-type proton ATPase subunit E 1	58224.2	30103.1	34010	26454.4	26779.2	49694.7	30733.4	28588.6	35581.4	43633.6	61132.2	9280.73	47287.9	37492.8	50978.7	11245.3
Q16864;Q16864-2	ATP6V1F	V-type proton ATPase subunit F;Isoform of Q16864, Isoform 2 of V-type proton ATPase subunit F	24350.6	28507	6895.3	NaN	NaN	39376.2	43205.7	14587.1	37851.4	46385.4	29330.7	31038.7	46045.9	32038.2	19885.5	42270.2
O75348	ATP6V1G1	V-type proton ATPase subunit G 1	65457.4	44644.6	25684.6	23155.4	24831.2	39277.3	14499.3	43117.8	44353.3	21057.1	26202.1	32922.9	20072.3	51953.5	32536	17084.4
I3L448;Q5TC12;Q5TC12-3	ATPAF1	Isoform of Q5TC12, ATP synthase mitochondrial F1 complex assembly factor 1;ATP synthase mitochondrial F1 complex assembly factor 1;Isoform of Q5TC12, Isoform 3 of ATP synthase mitochondrial F1 complex assembly factor 1	21227.8	15189.1	36043.9	NaN	NaN	20205.7	NaN	14967.2	32104.5	30302.5	23091.7	33535.3	26614.6	17031.5	18418.6	31098
Q8N5M1	ATPAF2	ATP synthase mitochondrial F1 complex assembly factor 2	26577.1	47047.4	53561	21944.2	34444.9	15007.2	40067.5	45434	66108.6	53813.1	40838.5	44675.8	34330	27224.1	19234.8	38774.5
Q9UII2	ATPIF1	ATPase inhibitor, mitochondrial	317781	236399	476878	494648	493724	272208	241726	150005	671680	497506	183352	568204	677414	251726	178864	185196
P46100;P46100-2;P46100-3;P46100-4;P46100-5	ATRX	Transcriptional regulator ATRX;Isoform of P46100, Isoform 1 of Transcriptional regulator ATRX;Isoform of P46100, Isoform 2 of Transcriptional regulator ATRX;Isoform of P46100, Isoform 3 of Transcriptional regulator ATRX;Isoform of P46100, Isoform 5 of Transcriptional regulator ATRX	3123.41	NaN	NaN	7956.36	18572.1	NaN	NaN	NaN	NaN	7516.23	10384.4	4274.31	NaN	NaN	NaN	NaN
Q9UBB4;Q9UBB4-2	ATXN10	Ataxin-10;Isoform of Q9UBB4, Isoform 2 of Ataxin-10	8556.14	NaN	2249.35	13660.2	2954.85	8491.63	3409.29	5519.89	7812.26	3899.69	3775.06	3224.72	3544.51	6767.2	11898.4	2363.53
F8VQP2;F8VRK6;F8WB06;H0YH87;Q99700;Q99700-2;Q99700-4;Q99700-5;V9GY86	ATXN2	Isoform of Q99700, Ataxin-2;Isoform of Q99700, Ataxin-2 (Fragment);Isoform of Q99700, Ataxin-2;Isoform of Q99700, Ataxin-2 (Fragment);Ataxin-2;Isoform of Q99700, Isoform 2 of Ataxin-2;Isoform of Q99700, Isoform 4 of Ataxin-2;Isoform of Q99700, Isoform 5 of Ataxin-2;Isoform of Q99700, Ataxin-2	NaN	NaN	NaN	NaN	33769.3	23337.7	21737.9	46998.1	18756.3	NaN	NaN	NaN	NaN	35477.5	21096.6	NaN
H3BUF6;Q8WWM7;Q8WWM7-2;Q8WWM7-3;Q8WWM7-4;Q8WWM7-5;Q8WWM7-6;Q8WWM7-8;Q8WWM7-9	ATXN2L	Isoform of Q8WWM7, Ataxin-2-like protein;Ataxin-2-like protein;Isoform of Q8WWM7, Isoform 2 of Ataxin-2-like protein;Isoform of Q8WWM7, Isoform 3 of Ataxin-2-like protein;Isoform of Q8WWM7, Isoform 4 of Ataxin-2-like protein;Isoform of Q8WWM7, Isoform 5 of Ataxin-2-like protein;Isoform of Q8WWM7, Isoform 6 of Ataxin-2-like protein;Isoform of Q8WWM7, Isoform 8 of Ataxin-2-like protein;Isoform of Q…	NaN	NaN	NaN	NaN	39613.7	NaN	NaN	NaN	46831.3	NaN	NaN	4141.02	4213.06	5702.26	3857.57	4066.52
Q13825	AUH	Methylglutaconyl-CoA hydratase, mitochondrial	27065.2	23487.6	8936.35	7527.27	6883.52	23476.4	15016	23031.4	24413.5	18952.2	18653.9	14024.9	9766.96	13351.5	20803.8	21102
Q9NQS1	AVEN	Cell death regulator Aven	NaN	NaN	NaN	NaN	12558.8	17129.4	12778.6	13516.8	17789.9	12831.6	NaN	8779.99	12087.5	18329.6	8610.78	11741.5
P25311	AZGP1	Zinc-alpha-2-glycoprotein	87904.5	92521.4	106177	74258	55449.1	112550	54389.9	60210.1	75398.5	61249.3	47059.3	76895.7	82260	165161	58591.7	69354.8
P61769	B2M	Beta-2-microglobulin	36863.6	19864	59966.5	42914.7	65482.9	37933.9	37416.4	43517.6	47885.8	43835.6	36778.1	35572.2	55188.3	47454.7	31128.4	42927
J3KQS6;Q9NWV8	BABAM1	Isoform of Q9NWV8, BRISC and BRCA1-A complex member 1;BRISC and BRCA1-A complex member 1	26300	25822.6	44298.6	27528.1	17435.8	29380.2	25507.6	13944.9	26082.7	24985.5	18801.1	17173.5	24524.8	17233	20696	16048.3
J3QTA2;Q99933;Q99933-3;Q99933-4	BAG1	Isoform of Q99933, BAG family molecular chaperone regulator 1;BAG family molecular chaperone regulator 1;Isoform of Q99933, Isoform 3 of BAG family molecular chaperone regulator 1;Isoform of Q99933, Isoform 4 of BAG family molecular chaperone regulator 1	13622.8	14066	12102.6	8524.86	10353.8	50188.5	10208.9	6205.68	8643.36	40011.9	6327.47	10532.7	7879	50961.4	7750.73	15904.1
O95816	BAG2	BAG family molecular chaperone regulator 2	37909.6	50963.8	38499.5	63827.6	35573	31435.7	24382.5	29207.8	30475.2	23780.9	21453.5	28220.1	28417.6	35499.7	42264.8	43460.6
C9JFK9	BAG3	Isoform of O95817, BAG family molecular chaperone regulator 3 (Fragment)	4209.52	NaN	9741.49	5933.34	8153.74	7198.86	6528.3	5338.42	NaN	6885.87	NaN	18968	8433.13	11834.1	5834.66	7647.58
O95817	BAG3	BAG family molecular chaperone regulator 3	536537	755909	857741	667540	821019	683010	536783	463933	493241	708117	372358	718664	772726	1.10837e+06	530400	525444
Q16611;Q16611-2	BAK1	Bcl-2 homologous antagonist/killer;Isoform of Q16611, Isoform 2 of Bcl-2 homologous antagonist/killer	5024.28	NaN	NaN	NaN	NaN	NaN	4653.33	9237.41	9311.69	55245.4	8230.68	3794.82	52330.8	8263.36	NaN	14342.3
O75531	BANF1	Barrier-to-autointegration factor	986956	791409	717411	698980	809758	833376	690251	789001	730306	678580	716502	705305	920454	1.05572e+06	858640	877855
P80723	BASP1	Brain acid soluble protein 1	9632.67	7050.84	5216.66	9415.13	NaN	3881.43	6709.73	6454.21	15515.6	9424.11	4893.86	11158.7	7005.35	48795.5	8453.95	8745.75
A0A024RCR6;A0A0G2JK23;P46379;P46379-2;P46379-3	BAT3;BAG6;BAG6;BAG6;BAG6	Isoform of P46379, BAG6;Isoform of P46379, Large proline-rich protein BAG6;Large proline-rich protein BAG6;Isoform of P46379, Isoform 2 of Large proline-rich protein BAG6;Isoform of P46379, Isoform 3 of Large proline-rich protein BAG6	6537.59	13172.9	18973.4	13874.7	16074	10311.8	9673.07	6921.67	8988.68	14195.7	9705.1	10550.2	15003.8	13899	13388.1	13012.9
Q07812;Q07812-2;Q07812-5;Q07812-7;Q07812-8	BAX	Apoptosis regulator BAX;Isoform of Q07812, Isoform Beta of Apoptosis regulator BAX;Isoform of Q07812, Isoform Epsilon of Apoptosis regulator BAX;Isoform of Q07812, Isoform Psi of Apoptosis regulator BAX;Isoform of Q07812, Isoform Sigma of Apoptosis regulator BAX	9051.87	12042.3	NaN	NaN	16150.2	10474.5	14090.2	10759.3	11048.7	52942.8	NaN	10116.2	NaN	17328.9	14060	NaN
Q9UIG0;Q9UIG0-2	BAZ1B	Tyrosine-protein kinase BAZ1B;Isoform of Q9UIG0, Isoform 2 of Tyrosine-protein kinase BAZ1B	106085	111496	55883.3	116804	65886.8	85823.6	42432.2	46041.4	50350.6	35619.6	66974.3	70623.4	71586.7	107031	206177	78965.9
P50895	BCAM	Basal cell adhesion molecule	58163.9	40542.6	69007.7	47987.6	64840.1	54093.3	58803.1	35325.4	68338.3	60048	35779.4	62602.1	50050.4	52070.9	57250.3	38099
Q9UHQ4	BCAP29	B-cell receptor-associated protein 29	13974	NaN	NaN	NaN	NaN	6300.76	8035.27	12192	12149.8	6772.96	14664	NaN	8825.35	9012.4	9295.91	9400.79
P51572;P51572-2	BCAP31	B-cell receptor-associated protein 31;Isoform of P51572, Isoform 2 of B-cell receptor-associated protein 31	15504.9	25804.1	16296	6740.04	25777	15794.8	15251.5	13039.1	21985.1	16691.7	19162	20397.1	20675.1	29055.4	24466.3	23224.9
O75934	BCAS2	Pre-mRNA-splicing factor SPF27	NaN	NaN	23280.2	NaN	NaN	NaN	NaN	76346.4	NaN	3814.64	NaN	37237.6	52897	NaN	NaN	NaN
M0QXF9;M0QZ10;O15382	BCAT2	Isoform of O15382, Branched-chain-amino-acid aminotransferase (Fragment);Isoform of O15382, Branched-chain-amino-acid aminotransferase;Branched-chain-amino-acid aminotransferase, mitochondrial	25152.8	45967.4	29915.1	16078.7	14818.4	19334.2	16136.5	22911.9	21560	24167.5	25097.1	22025.1	20606.6	14742.2	20916.6	23438.6
Q9P287;Q9P287-2;Q9P287-3;Q9P287-4	BCCIP	BRCA2 and CDKN1A-interacting protein;Isoform of Q9P287, Isoform 2 of BRCA2 and CDKN1A-interacting protein;Isoform of Q9P287, Isoform 3 of BRCA2 and CDKN1A-interacting protein;Isoform of Q9P287, Isoform 4 of BRCA2 and CDKN1A-interacting protein	NaN	NaN	NaN	NaN	1471.75	NaN	NaN	NaN	2043.14	NaN	NaN	NaN	4194.31	NaN	NaN	1852.16
P21953	BCKDHB	2-oxoisovalerate dehydrogenase subunit beta, mitochondrial	NaN	NaN	11534.5	NaN	11815.7	22228.6	29124.2	8051.77	14730.3	19368.1	14188.1	10504	NaN	15544.9	7536.3	7327.27
H3BS02;H3BTL2;O14874;O14874-2;O14874-3	BCKDK	Isoform of O14874, [3-methyl-2-oxobutanoate dehydrogenase [lipoamide]] kinase, mitochondrial;Isoform of O14874, [3-methyl-2-oxobutanoate dehydrogenase [lipoamide]] kinase, mitochondrial (Fragment);[3-methyl-2-oxobutanoate dehydrogenase [lipoamide]] kinase, mitochondrial;Isoform of O14874, Isoform 2 of [3-methyl-2-oxobutanoate dehydrogenase [lipoamide]] kinase, mitochondrial;Isoform of O14874, Iso…	13198.4	10475.6	9685.4	6123.11	7056.05	4836.54	3498.31	11722.9	26284.7	18842.6	17117.4	13995.8	16761.1	12941.5	22458.8	19070
Q9BXK5	BCL2L13	Bcl-2-like protein 13	209933	206169	195714	194316	216606	234608	150327	181397	221384	241524	157822	221706	244258	266883	159979	182147
A0A1W2PQ43;E9PK09;E9PK91;E9PKI6;E9PQN2;Q9NYF8;Q9NYF8-2;Q9NYF8-3	BCLAF1	Isoform of Q9NYF8, Bcl-2-associated transcription factor 1;Isoform of Q9NYF8, Bcl-2-associated transcription factor 1 (Fragment);Isoform of Q9NYF8, Bcl-2-associated transcription factor 1;Isoform of Q9NYF8, Bcl-2-associated transcription factor 1;Isoform of Q9NYF8, Bcl-2-associated transcription factor 1;Bcl-2-associated transcription factor 1;Isoform of Q9NYF8, Isoform 2 of Bcl-2-associated tran…	39473	34855.5	6673.59	NaN	55810.6	37448.6	23977.7	29459.1	34750.1	18536.5	12954.4	44393	38211.3	46552.3	41786.3	NaN
H0YCN8;Q9BYV7;Q9BYV7-2;Q9BYV7-4;Q9BYV7-5;Q9BYV7-6	BCO2	Isoform of Q9BYV7, Beta,beta-carotene 9',10'-oxygenase (Fragment);Beta,beta-carotene 9',10'-oxygenase;Isoform of Q9BYV7, Isoform 2 of Beta,beta-carotene 9',10'-oxygenase;Isoform of Q9BYV7, Isoform 4 of Beta,beta-carotene 9',10'-oxygenase;Isoform of Q9BYV7, Isoform 5 of Beta,beta-carotene 9',10'-oxygenase;Isoform of Q9BYV7, Isoform 6 of Beta,beta-carotene 9',10'-oxygenase	NaN	NaN	NaN	NaN	NaN	16624.4	15373.2	1939.32	9811.61	1753.45	10750.7	5703.68	NaN	3095.11	9768.56	9411.37
Q9Y276	BCS1L	Mitochondrial chaperone BCS1	15172	NaN	11326.7	20906.2	NaN	1470.1	2492.61	12261	11314	7062.67	21763.1	11847.2	4962.69	8999.97	6414.66	7577
Q02338	BDH1	D-beta-hydroxybutyrate dehydrogenase, mitochondrial	29192.9	50441.3	36819.4	11850.2	16885.4	38702.6	31223	45498.8	39698.7	53974.1	39597.4	32346.6	18935.5	25493.8	37719.6	39883
Q9BUT1;Q9BUT1-2	BDH2	3-hydroxybutyrate dehydrogenase type 2;Isoform of Q9BUT1, Isoform 2 of 3-hydroxybutyrate dehydrogenase type 2	NaN	NaN	4720.75	4093.5	5039.17	5778.73	2468.35	NaN	8421.25	6205.72	NaN	13693.3	6982.72	NaN	NaN	10294.9
P21810	BGN	Biglycan	30570.7	20684.3	20079.7	21565.3	21141.9	13917.7	18742.3	9527.15	38591.8	22765.8	18454.2	37880.1	21696.3	97575.5	44287.3	25227.7
P55957;P55957-2	BID	BH3-interacting domain death agonist;Isoform of P55957, Isoform 2 of BH3-interacting domain death agonist	2671.5	4217.77	2536.82	4812.32	2705.91	7349.29	NaN	2645.9	6214.83	2875.78	3151.84	2348.19	4374.04	8154.23	5612.16	4367.59
O00499;O00499-11;O00499-2;O00499-6	BIN1	Myc box-dependent-interacting protein 1;Isoform of O00499, Isoform BIN1+12A of Myc box-dependent-interacting protein 1;Isoform of O00499, Isoform IIB of Myc box-dependent-interacting protein 1;Isoform of O00499, Isoform II2 of Myc box-dependent-interacting protein 1	679786	747970	866577	756865	1.0138e+06	934750	566617	752124	746408	805913	517452	807071	930263	1.33732e+06	710711	799692
Q9NR09	BIRC6	Baculoviral IAP repeat-containing protein 6	30982.6	10141.9	36899.8	11298.3	17951.2	51193.2	8344.83	8395.46	12717	15195.2	7003.5	47580.5	16326.7	59450.8	7240.89	9015.65
A0A1W2PS85;P28715;P28715-2;R4GMW8	BIVM-ERCC5;ERCC5;ERCC5;BIVM-ERCC5	Isoform of R4GMW8, BIVM-ERCC5 readthrough;DNA repair protein complementing XP-G cells;Isoform of P28715, Isoform 2 of DNA repair protein complementing XP-G cells;BIVM-ERCC5 readthrough	55523.2	43183.7	39734.2	48356.8	35595.5	26797.9	17780.6	18586.2	13706.7	12374.5	19988	21426.7	26879.6	29797	38511.1	28828.9
Q13867	BLMH	Bleomycin hydrolase	41705.7	42505.1	34363.2	29814.9	32952.6	46725.4	35198.5	29975.3	34280.5	23575.6	22901	29605.6	20384.6	31657.8	27948.4	28904.9
Q6QNY1	BLOC1S2	Biogenesis of lysosome-related organelles complex 1 subunit 2	NaN	NaN	1887.87	1629.38	4541.88	2690.73	2284.34	2486.76	4848.28	3483.22	3563.23	5606.2	9595.53	10347.5	3645.34	4894.43
P53004	BLVRA	Biliverdin reductase A	40591.1	48690.3	40743.6	50297.2	37371.4	43917.9	36831.5	38866.9	50445.1	46822.2	41582	52474	46292.7	29313.7	44346.5	44058.1
P30043	BLVRB	Flavin reductase (NADPH)	546632	700052	682360	760226	533231	636049	563719	436204	603419	583181	727052	659248	713816	482626	530240	503943
Q12983	BNIP3	BCL2/adenovirus E1B 19 kDa protein-interacting protein 3	8008.42	371803	17020.7	21044.7	5348.77	12365.3	8120.93	28801.9	5939.55	9676.01	25130.8	19974.5	12350	16937.9	14379.9	11788.8
Q9Y3E2	BOLA1	BolA-like protein 1	11510.6	NaN	NaN	NaN	27143.3	NaN	NaN	16062.7	20840	22521.2	NaN	14253	25968.1	28028.8	8797.31	NaN
A0A087WZT3;Q9H3K6	BOLA2	Isoform of Q9H3K6, BolA-like protein 2;BolA-like protein 2	36081.4	20475.5	17337.4	12698.7	17153	20671	25909.5	19275.2	22709.2	14636.6	17887.9	20704.6	15223	19635.5	21351.8	20877
Q53S33	BOLA3	BolA-like protein 3	NaN	NaN	NaN	38861.2	NaN	NaN	NaN	NaN	31477.4	58380.4	26451	29600.9	21691.6	25716	NaN	19581.6
G3V1P3;Q969J3	BORCS5	Isoform of Q969J3, BLOC-1-related complex subunit 5;BLOC-1-related complex subunit 5	26551.9	NaN	NaN	18225.5	21969.2	NaN	NaN	3001.82	3398.18	17365.9	2420.1	19247.3	NaN	NaN	3638.39	12961.2
Q96GS4	BORCS6	BLOC-1-related complex subunit 6	NaN	NaN	NaN	10973	6947.27	NaN	4888.23	3726.21	5687.86	3472.9	4233.74	NaN	5584.11	7855.91	NaN	3868.73
A0A0B4J1R7;Q96B45	BORCS7-ASMT;BORCS7	BORCS7-ASMT readthrough (NMD candidate);BLOC-1-related complex subunit 7	NaN	NaN	NaN	NaN	NaN	NaN	NaN	NaN	NaN	NaN	NaN	NaN	NaN	6443.97	NaN	NaN
P07738	BPGM	Bisphosphoglycerate mutase	63311.6	65321	63450.8	68960.7	61004.8	64714.7	51455.8	37207.2	42976	35884.9	42533.2	70938.9	52766.8	66850	53501.8	33378.4
O95861	BPNT1	3'(2'),5'-bisphosphate nucleotidase 1	20976.2	18314.5	11157.5	15018.6	15145.9	18991.7	15778.4	13102.8	14380.7	14840.8	11070.1	14431.6	21575.6	14783.5	8887.23	16702.6
P46736;P46736-2;P46736-3	BRCC3	Lys-63-specific deubiquitinase BRCC36;Isoform of P46736, Isoform 1 of Lys-63-specific deubiquitinase BRCC36;Isoform of P46736, Isoform 3 of Lys-63-specific deubiquitinase BRCC36	3225.16	NaN	3114.42	5389.21	2818.21	2141.18	2602.36	2697.48	3441.73	3899.33	1779.85	2033.19	NaN	NaN	2735.55	2781.83
Q5VW32	BROX	BRO1 domain-containing protein BROX	6760.5	22586.3	19314.4	21378.1	25391.9	26838.4	20066.4	7076.06	8359.27	17915.1	23279.6	15802.5	25343.7	21286.9	27925.6	21514.6
Q9NW68;Q9NW68-2;Q9NW68-5	BSDC1	BSD domain-containing protein 1;Isoform of Q9NW68, Isoform 2 of BSD domain-containing protein 1;Isoform of Q9NW68, Isoform 5 of BSD domain-containing protein 1	NaN	NaN	3078.84	NaN	3331.36	NaN	2625.37	NaN	NaN	2614.21	NaN	110987	120743	2698.93	NaN	2966.1
P35613;P35613-2	BSG	Basigin;Isoform of P35613, Isoform 2 of Basigin	194599	238408	217341	167149	185870	226380	225012	224446	292778	302587	212108	238074	250813	227608	218522	282100
Q10589;Q10589-2	BST2	Bone marrow stromal antigen 2;Isoform of Q10589, Isoform 2 of Bone marrow stromal antigen 2	35229.6	45799.2	33203.8	22661.2	27768.2	25488.8	20764	37629.1	32157.9	22620.5	29098.9	26146.8	27785.4	56652.5	35347.2	32616.3
P20290	BTF3	Transcription factor BTF3	8616.19	17457.5	16395.9	11031.3	14518.2	15673.4	11987.7	13117.9	19303.4	13284.2	13557.1	23094.4	20074.3	27698.7	23861.4	19602.2
Q96K17	BTF3L4	Transcription factor BTF3 homolog 4	47217.1	31950.7	54727.2	29418.5	24587.4	31162.5	19534.2	27069.8	48505.6	23978.9	28490.4	35359.3	26979.3	50749.7	25211.4	26349.7
J3QSX4;J3QT28;O43684;O43684-2	BUB3	Isoform of O43684, Mitotic checkpoint protein BUB3;Isoform of O43684, Mitotic checkpoint protein BUB3 (Fragment);Mitotic checkpoint protein BUB3;Isoform of O43684, Isoform 2 of Mitotic checkpoint protein BUB3	12632.8	17583.9	8541.33	NaN	NaN	13623.1	11095.7	NaN	15940.5	6047.11	13668	6723.05	10234.7	14111.1	17914.7	5425.59
E7ETZ4;Q9Y6E2	BZW2	Isoform of Q9Y6E2, Basic leucine zipper and W2 domain-containing protein 2 (Fragment);Basic leucine zipper and W2 domain-containing protein 2	4429303	7395629	8812868	5.08827e+06	6.20448e+06	8015988	7628704	4.35875e+06	9890227	5036012	7.03316e+06	7.51789e+06	14063127	15009139	8432906	11913398
Q711Q0	C10orf71	Uncharacterized protein C10orf71	16282.6	22405.9	21032.5	15837.4	21234	24835.4	16005.4	15507.3	18583.1	17733.5	14940.4	16740.4	16952.5	35762.8	16271.5	12881.2
A0A087WT99;Q9H0W9;Q9H0W9-2	C11orf54	Isoform of Q9H0W9, Ester hydrolase C11orf54;Ester hydrolase C11orf54;Isoform of Q9H0W9, Isoform 2 of Ester hydrolase C11orf54	138382	184817	172344	118109	154205	203256	153597	132310	114556	152724	129280	109869	141201	178352	132408	116728
Q9H3H3;Q9H3H3-2;Q9H3H3-3	C11orf68	UPF0696 protein C11orf68;Isoform of Q9H3H3, Isoform 2 of UPF0696 protein C11orf68;Isoform of Q9H3H3, Isoform 3 of UPF0696 protein C11orf68	27941.6	NaN	37983.5	32274.3	34440.6	41272.9	32571.1	26763.7	39261.2	30933.8	20475	38384	32340.9	25338.2	25939.5	22014.8
F8VQQ3;Q9HB07	C12orf10	Isoform of Q9HB07, UPF0160 protein MYG1, mitochondrial;UPF0160 protein MYG1, mitochondrial	4269.08	NaN	NaN	18259.3	NaN	2670.71	NaN	NaN	6386.42	17250.5	3309.36	NaN	NaN	12108.4	14551.4	NaN
Q99622	C12orf57	Protein C10	12256	17492.9	30198	10880.2	36998.2	26193.8	15808.4	17636.7	25706.8	15984.7	18885.6	16521.6	20342.2	26824.7	17258	20279.5
Q69YU5	C12orf73	Uncharacterized protein C12orf73	NaN	NaN	NaN	NaN	NaN	NaN	NaN	NaN	13938.9	2206.18	13263.4	NaN	5036.35	5753.46	4773.91	13152.7
A0A0A6YYH1;Q7Z6K5;Q7Z6K5-2	C15orf38-AP3S2;ARPIN;ARPIN	Protein C15orf38-AP3S2;Arpin;Isoform of Q7Z6K5, Isoform C15orf38-AP3S2 of Arpin	NaN	NaN	NaN	22075	21692	NaN	NaN	NaN	NaN	26002.6	32957.4	20909.7	18449.6	NaN	24069.6	NaN
H3BQZ5;Q8WUR7	C15orf40	Isoform of Q8WUR7, UPF0235 protein C15orf40;UPF0235 protein C15orf40	NaN	NaN	8584.89	9163.68	6058.01	NaN	7192.63	5799.36	6875.05	NaN	NaN	10609.2	7752.81	13073.1	NaN	9565.98
Q6ZUT6;Q6ZUT6-4	C15orf52	Uncharacterized protein C15orf52;Isoform of Q6ZUT6, Isoform 4 of Uncharacterized protein C15orf52	7813.24	6930.17	8517.05	10559.7	7487.43	8659.55	8655.38	7209.51	13030.6	7128.59	6195.78	8133.8	8738.8	13818.1	14270.9	8662.2
F8WFD6;Q6ZW13;R4GNF0	C16orf86	Isoform of Q6ZW13, Uncharacterized protein C16orf86;Uncharacterized protein C16orf86;Isoform of Q6ZW13, Uncharacterized protein C16orf86 (Fragment)	122557	118120	206791	163025	173936	196651	136633	102912	139828	148484	94558.7	157582	153332	145176	116668	138779
A6NNT2	C16orf96	Uncharacterized protein C16orf96	96184.6	NaN	8620.28	NaN	NaN	35538	134441	132256	54998.6	43430.1	263780	45822.9	32966.3	52624	142995	98306
Q96B23-2	C18orf25	Isoform of Q96B23, Isoform 2 of Uncharacterized protein C18orf25	4095.42	2984.86	NaN	NaN	NaN	3516.23	3517.15	3953.33	5283.83	3023.3	2930.11	1500.06	5192.41	5276.89	NaN	4040.3
K7EPS8;Q9NSK7;Q9NSK7-3;Q9NSK7-4	C19orf12	Isoform of Q9NSK7, Protein C19orf12 (Fragment);Protein C19orf12;Isoform of Q9NSK7, Isoform 3 of Protein C19orf12;Isoform of Q9NSK7, Isoform 1 of Protein C19orf12	2766.46	1279.33	NaN	NaN	NaN	NaN	NaN	2118.29	16106.1	15497.8	8847.5	NaN	21233.9	2827.96	4127.43	12636
E7EP72;Q9UFG5	C19orf25	Isoform of Q9UFG5, UPF0449 protein C19orf25;UPF0449 protein C19orf25	NaN	4296.7	NaN	NaN	549427	NaN	NaN	NaN	NaN	NaN	NaN	NaN	7649.13	16413.3	NaN	NaN
A0A140TA86;Q5XKP0	C19orf70;MIC13	Isoform of Q5XKP0, MICOS complex subunit MIC13;MICOS complex subunit MIC13	54205.5	10350.2	44305.6	NaN	30467.3	NaN	NaN	18558.6	31866.7	45947.1	43724.2	32455.6	35646.9	NaN	12119.3	41455.6
Q6ZSJ8;Q6ZSJ8-2	C1orf122	Uncharacterized protein C1orf122;Isoform of Q6ZSJ8, Isoform 2 of Uncharacterized protein C1orf122	10614	NaN	18052.1	15757.9	16811.8	19803.3	15260.5	13171	9546.37	9797.98	14402	24911.2	14361.1	37543.6	10442.9	23026.7
Q9NWV4	C1orf123	UPF0587 protein C1orf123	153913	150855	194556	132330	140670	183541	134395	121347	160510	132510	130842	131116	139239	178048	155250	129937
Q9H425;Q9H425-2;Q9H425-3	C1orf198	Uncharacterized protein C1orf198;Isoform of Q9H425, Isoform 2 of Uncharacterized protein C1orf198;Isoform of Q9H425, Isoform 3 of Uncharacterized protein C1orf198	NaN	NaN	NaN	NaN	NaN	NaN	NaN	NaN	NaN	NaN	NaN	NaN	NaN	49687.4	NaN	NaN
Q9H246	C1orf21	Uncharacterized protein C1orf21	1277.33	NaN	6636.31	NaN	5983.34	NaN	104877	956.05	2765.89	6221.4	1994.09	12176.8	3851.64	21870.6	NaN	304945
A0A0A0MSV6;D6R934;P02746	C1QB	Isoform of P02746, Complement C1q subcomponent subunit B (Fragment);Isoform of P02746, Complement C1q subcomponent subunit B;Complement C1q subcomponent subunit B	12606.1	10316.7	14732.2	20336.7	9976.91	8104.88	10226.2	3680.33	8387.29	7533.89	6595.02	14877.5	NaN	5811.22	8937.16	4497.17
Q07021	C1QBP	Complement component 1 Q subcomponent-binding protein, mitochondrial	506619	430720	519762	353250	419134	599489	416771	496824	746465	520384	479557	632969	630306	758365	536660	561981
P02747	C1QC	Complement C1q subcomponent subunit C	45882.3	38728.5	45527.2	69354.5	68192.9	24397.8	27375.2	15215.7	39648.3	47327.5	48133	40888.2	36016.9	32114.3	42090.1	31772.1
B4DPQ0;F5H2D0;P00736	C1R	Isoform of P00736, Complement C1r subcomponent;Isoform of P00736, Complement C1r subcomponent;Complement C1r subcomponent	3787.65	3858.61	NaN	5636.58	1872.58	NaN	NaN	NaN	NaN	NaN	12411.7	3900.98	NaN	4000.54	NaN	10741.2
Q9NZP8	C1RL	Complement C1r subcomponent-like protein	NaN	NaN	5532.6	9427.29	8435.96	NaN	NaN	6004.85	NaN	5028.3	NaN	NaN	NaN	8014.75	16331.7	NaN
A0A087X232;P09871	C1S	Isoform of P09871, Complement C1s subcomponent;Complement C1s subcomponent	23101	23404.4	15399.1	21705	20338.9	NaN	25078.7	13790.3	9734.42	NaN	16260.4	22946.8	17483.2	18907.6	13239.7	6623.35
Q9BSF0	C2orf88	Small membrane A-kinase anchor protein	NaN	NaN	10676.1	NaN	NaN	NaN	NaN	NaN	NaN	9681.6	NaN	13955.5	8101.52	NaN	NaN	NaN
P01024	C3	Complement C3	247120	290353	154738	315807	214609	163050	175305	121729	164940	137519	171409	184427	182880	126390	213448	206846
A0A0G2JL54;A0A140TA29;A0A140TA32;A0A140TA44	C4B_2;C4B;C4A;C4A	Isoform of P0C0L5, Complement C4-B;Isoform of P0C0L5, Complement C4-B;Isoform of P0C0L4, Complement C4-A;Isoform of P0C0L4, Complement C4-A	72683.7	82897.6	56136.3	119494	55892	67709.6	56872.3	64842.6	43405.1	66577.9	60032.9	68492.8	44936.6	57991.5	90410.1	76227
P04003	C4BPA	C4b-binding protein alpha chain	21868.2	23442	10515.2	24483.5	9564.12	24349.8	12767.4	6740.67	10251.1	14409.4	19396.5	15302.6	19619.2	10621.8	26751.3	16676.8
P01031	C5	Complement C5	16459.4	11159.9	9450.22	19279.4	14060.5	22798.9	9426.76	NaN	NaN	9749.19	12418.9	15878.4	12617.9	6065.3	14552.6	13194.3
Q9H799;Q9H799-5	C5orf42	Protein JBTS17;Isoform of Q9H799, Isoform 2 of Protein JBTS17	NaN	NaN	NaN	NaN	401532	42351.3	NaN	NaN	740198	45645056	NaN	23005.1	NaN	914109	NaN	398883
A0A140T9G8;Q0P5T2;Q5SQH8;Q5SQH8-2;Q5SQH8-3;Q5SQH8-4	C6orf136	Isoform of Q5SQH8, Uncharacterized protein C6orf136 (Fragment);Isoform of Q5SQH8, C6orf136 protein (Fragment);Uncharacterized protein C6orf136;Isoform of Q5SQH8, Isoform 2 of Uncharacterized protein C6orf136;Isoform of Q5SQH8, Isoform 3 of Uncharacterized protein C6orf136;Isoform of Q5SQH8, Isoform 4 of Uncharacterized protein C6orf136	NaN	NaN	332575	NaN	NaN	NaN	445726	196549	1253.23	2036.27	1623.59	3058.55	672.837	NaN	NaN	1444.25
A0A0D9SEI0;Q9P0P8	C6orf203	Isoform of Q9P0P8, Uncharacterized protein C6orf203;Uncharacterized protein C6orf203	86123.5	NaN	NaN	176381	NaN	5.23818e+06	NaN	8512.2	12344	NaN	76289.1	NaN	159555	15283.9	26753	11848.8
P10643	C7	Complement component C7	NaN	NaN	NaN	3378.67	2484.25	NaN	NaN	NaN	1232.46	1618.94	NaN	NaN	1878.76	NaN	1633.47	1541.09
P07357	C8A	Complement component C8 alpha chain	10648.7	29292.8	19231.3	15911.7	19294.2	5574.35	5555.41	15792	14753.3	4106.92	12022.2	15300.1	11838	4220.09	13944	12059.3
F5GY80;F5H7G1;P07358	C8B	Isoform of P07358, Complement component C8 beta chain;Isoform of P07358, Complement component C8 beta chain;Complement component C8 beta chain	5909.78	NaN	NaN	5170.84	NaN	NaN	2764.95	NaN	8085.99	NaN	1808.96	3404.73	3997.19	34630.1	5199.16	4221.77
H0YF29;Q6P1X6;Q6P1X6-2	C8orf82	Isoform of Q6P1X6, UPF0598 protein C8orf82 (Fragment);UPF0598 protein C8orf82;Isoform of Q6P1X6, Isoform 2 of UPF0598 protein C8orf82	6477.75	3879.87	NaN	6755.3	NaN	NaN	5955.23	4653.38	9474	8553.45	10765.7	5832.2	NaN	5723.91	6766	3116.84
P02748	C9	Complement component C9	10698.4	16217.3	NaN	37403	NaN	14345.5	82759	21200.3	6168.88	NaN	NaN	24221.9	NaN	NaN	16526	19847.9
Q5T6V5	C9orf64	Queuosine salvage protein	NaN	15836.4	18872.1	NaN	NaN	385319	10757.7	NaN	NaN	NaN	12964.1	9883.38	20285.4	5380.74	17315.8	8682.01
P00915	CA1	Carbonic anhydrase 1	911058	895435	778582	1262546	1.24463e+06	973762	628916	452775	598170	377191	754510	956226	1.00314e+06	1.04845e+06	1.23171e+06	878519
Q9ULX7	CA14	Carbonic anhydrase 14	33777.5	NaN	NaN	NaN	NaN	NaN	NaN	40595.3	27390.5	25303.4	24386.7	38429.4	18256.8	NaN	59755	50453.3
P00918	CA2	Carbonic anhydrase 2	626737	550216	513352	674260	521340	591329	375091	428082	444144	391895	455334	586609	499256	499004	483509	447836
P07451	CA3	Carbonic anhydrase 3	48262832	64531888	70950312	55906668	56266676	73108408	70919976	53434172	38550448	49253360	57337620	47201016	45881588	50127464	69617056	36619124
P22748	CA4	Carbonic anhydrase 4	36089.6	37032.2	30700.6	22249.1	25979.5	43627.2	21132.5	32228.7	45876.6	22181.3	17591.6	22335.2	18535.1	26085.1	22476.7	24020.8
Q9Y376	CAB39	Calcium-binding protein 39	40355.6	44553.7	63542.9	51342.3	71624.9	83246.9	72308.4	49911.8	52222.3	55235.5	50509	54243.1	70079.3	67959.2	65528.7	51796.6
B1ALM3;Q13698	CACNA1S	Isoform of Q13698, Voltage-dependent L-type calcium channel subunit alpha;Voltage-dependent L-type calcium channel subunit alpha-1S	22410.9	23256.1	18792.7	17272.3	24932.5	21577.2	21285.4	31885.5	19090.7	23233.2	16574.7	18472.6	18312.4	16656.6	18742.9	20147.2
P54289	CACNA2D1	Voltage-dependent calcium channel subunit alpha-2/delta-1	141459	168896	183079	152858	202157	166325	153525	149465	141961	160607	92254.3	131711	142824	149752	128118	138704
Q02641-2	CACNB1	Isoform of Q02641, Isoform 2 of Voltage-dependent L-type calcium channel subunit beta-1	40943.2	41334.2	37467	41249.6	43294.1	35726.5	36112.8	40316.3	33432.8	34871.3	35490.2	32082.1	36073.2	27715	36001.9	34802.7
F8VU10;F8VUW8;P54284;P54284-2;P54284-3;P54284-4;P54284-5	CACNB3	Isoform of P54284, Voltage-dependent L-type calcium channel subunit beta-3 (Fragment);Isoform of P54284, Voltage-dependent L-type calcium channel subunit beta-3 (Fragment);Voltage-dependent L-type calcium channel subunit beta-3;Isoform of P54284, Isoform 2 of Voltage-dependent L-type calcium channel subunit beta-3;Isoform of P54284, Isoform 3 of Voltage-dependent L-type calcium channel subunit be…	21959.2	2944.38	34286.1	6160.07	28754.1	38161.1	22111.4	21894.2	21822.1	32053.8	9679.3	18587.4	41075.3	23299.7	7662.81	25830.1
Q06432	CACNG1	Voltage-dependent calcium channel gamma-1 subunit	160328	171629	171749	107748	189105	255786	156298	181240	144437	128346	131364	87413.1	148242	176553	153003	169396
Q9HB71;Q9HB71-3	CACYBP	Calcyclin-binding protein;Isoform of Q9HB71, Isoform 3 of Calcyclin-binding protein	NaN	7014.5	7324.25	4003.46	8453.42	NaN	NaN	NaN	52113.7	4906.7	42895.9	30388.4	5417.32	NaN	NaN	27704.2
F8VQE3;Q9P1Z2;Q9P1Z2-2;Q9P1Z2-3;Q9P1Z2-4	CALCOCO1	Isoform of Q9P1Z2, Calcium-binding and coiled-coil domain-containing protein 1 (Fragment);Calcium-binding and coiled-coil domain-containing protein 1;Isoform of Q9P1Z2, Isoform 2 of Calcium-binding and coiled-coil domain-containing protein 1;Isoform of Q9P1Z2, Isoform 3 of Calcium-binding and coiled-coil domain-containing protein 1;Isoform of Q9P1Z2, Isoform 4 of Calcium-binding and coiled-coil d…	NaN	NaN	3803.16	NaN	NaN	8256.76	NaN	NaN	3658.11	NaN	NaN	4170.47	NaN	4477.07	3848.39	NaN
D6REB0;Q13137;Q13137-3;Q13137-4;Q13137-5	CALCOCO2	Isoform of Q13137, Calcium-binding and coiled-coil domain-containing protein 2 (Fragment);Calcium-binding and coiled-coil domain-containing protein 2;Isoform of Q13137, Isoform 3 of Calcium-binding and coiled-coil domain-containing protein 2;Isoform of Q13137, Isoform 4 of Calcium-binding and coiled-coil domain-containing protein 2;Isoform of Q13137, Isoform 5 of Calcium-binding and coiled-coil d…	NaN	NaN	7468.59	NaN	NaN	4564.11	NaN	6148.82	7593.03	NaN	5448.45	NaN	NaN	3467.1	5413.41	7216.7
E7EX44;Q05682-3	CALD1	Isoform of Q05682, Caldesmon;Isoform of Q05682, Isoform 3 of Caldesmon	99918.2	95232.1	82922.4	61972.3	100183	95039.2	84531.8	64656.2	137223	79604.9	75910.9	129480	102128	181215	108583	92948
Q05682	CALD1	Caldesmon	54372.4	15308.6	48212.4	NaN	43940.3	NaN	85168.3	NaN	22717.7	37804	NaN	31587.8	49750.6	27259.6	42851.8	NaN
E7ETZ0;H0Y7A7;P0DP23;P0DP24;P0DP25	CALM1;CALM2;CALM1;CALM2;CALM3	Isoform of P0DP23, Calmodulin-1;Isoform of P0DP23, Calmodulin-2 (Fragment);Calmodulin-1;Calmodulin-2;Calmodulin-3	3.84643e+06	4760537	4.45142e+06	5572987	6540073	5285842	4.37427e+06	4049002	5018291	9032960	3.74767e+06	5938915	7.98576e+06	11118493	5.28124e+06	6419628
P27797	CALR	Calreticulin	264501	323501	303404	293396	301865	285196	254520	250217	330106	277356	237413	385877	356990	454388	285181	223856
O43852-2;O43852-4	CALU	Isoform of O43852, Isoform 2 of Calumenin;Isoform of O43852, Isoform 4 of Calumenin	96185.7	97929.3	77928.4	79649.8	77521.2	104027	57297.1	75370.6	100302	54234.5	63783.1	84232.8	91469.2	242273	133053	83328
O43852;O43852-3	CALU	Calumenin;Isoform of O43852, Isoform 3 of Calumenin	151017	194329	188773	173040	173938	189353	146495	133503	229229	150414	146963	190741	187939	355098	145335	157358
Q9UQM7-2	CAMK2A	Isoform of Q9UQM7, Isoform B of Calcium/calmodulin-dependent protein kinase type II subunit alpha	35270	18998	21167	27124.1	41229.1	24535.7	25105.6	25563.6	22522	16666.5	37340.8	21000.2	19072.3	19840.3	31282.8	16496.6
Q13554	CAMK2B	Calcium/calmodulin-dependent protein kinase type II subunit beta	19075.3	12956.6	12080	15382.3	15092.2	17093.7	21047.3	19730.1	18259	18934.3	23088.1	14986.4	18148.6	19591.8	23512.6	23096.9
Q13557-10;Q13557-11;Q13557-6	CAMK2D	Isoform of Q13557, Isoform Delta 10 of Calcium/calmodulin-dependent protein kinase type II subunit delta;Isoform of Q13557, Isoform Delta 11 of Calcium/calmodulin-dependent protein kinase type II subunit delta;Isoform of Q13557, Isoform Delta 9 of Calcium/calmodulin-dependent protein kinase type II subunit delta	35595.7	31160.7	20278.6	23519.5	24418.7	34780.7	35679.9	33380.5	34665	33768.9	45780.4	23902.1	38392.1	55984.3	32687.1	36520.3
A0A0A0MS52;Q13555-5;Q13555-6;Q5SWX3	CAMK2G	Isoform of Q13555, Calcium/calmodulin-dependent protein kinase (CaM kinase) II gamma, isoform CRA_a;Isoform of Q13555, Isoform 5 of Calcium/calmodulin-dependent protein kinase type II subunit gamma;Isoform of Q13555, Isoform 6 of Calcium/calmodulin-dependent protein kinase type II subunit gamma;Isoform of Q13555, Calcium/calmodulin-dependent protein kinase (CaM kinase) II gamma, isoform CRA_n	12193.5	10003.2	8817.58	10849.1	10264.3	7039.29	10718.7	10933.6	12393.9	10505.1	13026.4	8656.65	9502.43	7502.34	15668.4	10267.8
Q86VP6	CAND1	Cullin-associated NEDD8-dissociated protein 1	41798.4	29257.9	25025.2	29883.1	26938.2	23782.5	19181.3	18034.4	25024.5	19473.2	21082.5	24996.3	25419.8	30232.5	32953	19466.8
O75155	CAND2	Cullin-associated NEDD8-dissociated protein 2	38007.8	26297.4	32828.8	27218.1	33639.2	27523.4	29860.8	32218.2	34811.9	33186	24111	34867.2	29312.4	27761.7	32030.6	36232.5
P27824;P27824-2	CANX	Calnexin;Isoform of P27824, Isoform 2 of Calnexin	59748.3	59003.9	52208.1	48760.3	59779.3	59203.7	52052.9	56265.3	77711.4	54200.5	58088.7	53262.6	71526.7	103683	69095.3	67763.6
Q01518	CAP1	Adenylyl cyclase-associated protein 1	103264	86249.9	80399.2	58338	58866	73513.7	51395.4	38607.3	88226.8	59777.6	63706.1	64117.6	65259.9	74198.9	75382.5	67348.6
P40123	CAP2	Adenylyl cyclase-associated protein 2	174789	176668	190030	154961	214772	220190	186164	162834	168744	140029	131332	160705	200893	150686	204457	179596
P40121	CAPG	Macrophage-capping protein	15743.3	17389.7	11877.7	13776.2	3826.62	NaN	33706.6	41064	NaN	8648.41	8874.44	10056.2	6308.64	11312.5	13241.9	6133.19
P07384	CAPN1	Calpain-1 catalytic subunit	46255.1	40251.5	45060.3	42802.4	51831.3	40919.6	48757	39271	47906.8	46592.1	36345.9	38788.1	36918.1	34432.3	35221.9	32533.5
P17655	CAPN2	Calpain-2 catalytic subunit	84540.4	87365.6	72505.9	79518.6	87827.9	86018.6	84155.3	89142	116081	65689.7	71415.7	67132	90860.5	98847.2	84174.2	92961.8
P20807	CAPN3	Calpain-3	71161.9	71964.7	90506.5	82211.8	101512	89321.6	74134.4	82855.8	80692.3	115176	73664.2	87113.2	118810	95582.2	78286.5	107286
A0A0C4DGQ5;P04632	CAPNS1	Isoform of P04632, Calpain small subunit 1;Calpain small subunit 1	139701	136555	103875	130181	116462	121473	132746	127580	132693	119428	117871	117765	124974	129458	139552	147762
Q14444	CAPRIN1	Caprin-1	46404.4	2.62424e+06	3.63091e+06	2.94989e+06	3.8859e+06	3.44543e+06	3.23045e+06	2.52353e+06	2956680	2.88274e+06	2.35591e+06	3.83342e+06	3611960	3.38771e+06	2.88823e+06	3.11997e+06
P52907	CAPZA1	F-actin-capping protein subunit alpha-1	45930.8	24983.8	20702.7	35435.5	28284.9	33153.5	29658.9	23890.5	38771.2	37001.5	30935.4	30146.8	33230	37031	29280.6	34432.2
P47755	CAPZA2	F-actin-capping protein subunit alpha-2	193402	137335	163473	147955	146938	155993	174042	164254	157369	156838	208130	149224	150222	171767	168598	148561
B1AK87	CAPZB	Isoform of P47756, Capping protein (Actin filament) muscle Z-line, beta, isoform CRA_a	NaN	NaN	NaN	NaN	NaN	NaN	NaN	7246.13	12120.7	NaN	NaN	NaN	NaN	13883.3	10625.2	NaN
P47756	CAPZB	F-actin-capping protein subunit beta	278294	285393	219006	219602	264749	321760	346323	328033	317985	311531	345497	195123	330823	326898	359952	413852
Q96LW7-2	CARD19	Isoform of Q96LW7, Isoform 2 of Caspase recruitment domain-containing protein 19	NaN	3575.62	NaN	NaN	NaN	4101.04	4872.54	NaN	6370.74	15898.1	8386.36	10439.4	8940.83	2088.5	10080.8	8474.66
Q9Y2V2	CARHSP1	Calcium-regulated heat-stable protein 1	29739.2	24152.4	27156.3	27906.9	30814.9	29809.1	30699.7	15676.7	39699.1	13348.6	NaN	25035.4	32149.5	28908.8	20280.7	19324.5
Q86X55;Q86X55-1	CARM1	Histone-arginine methyltransferase CARM1;Isoform of Q86X55, Isoform 1 of Histone-arginine methyltransferase CARM1	54150.9	NaN	14240.7	32434.1	44760.5	37326.8	32660	90502.1	16248.1	NaN	28532	16527.1	458367	38456.7	14904.1	50804.3
A5YM72;A5YM72-3;A5YM72-5	CARNS1	Carnosine synthase 1;Isoform of A5YM72, Isoform 3 of Carnosine synthase 1;Isoform of A5YM72, Isoform 5 of Carnosine synthase 1	32809.3	15774.3	8615.13	18559.8	NaN	15757.4	21018.6	42872.5	43355.5	30954.3	43763.2	36214.7	32883.9	29053.2	45263.5	75726.5
B4DKY1;P49589;P49589-2;P49589-3	CARS	Isoform of P49589, Cysteine--tRNA ligase, cytoplasmic;Cysteine--tRNA ligase, cytoplasmic;Isoform of P49589, Isoform 2 of Cysteine--tRNA ligase, cytoplasmic;Isoform of P49589, Isoform 3 of Cysteine--tRNA ligase, cytoplasmic	12716.7	8779.17	13796.1	16713.5	20319.2	18199.8	20012.3	16966.3	18695.4	10676.1	12600.3	11560.2	18035.8	19462	10483.4	18779.3
Q9HA77	CARS2	Probable cysteine--tRNA ligase, mitochondrial	29514.1	24379.9	22330.6	92285.5	13315.9	18881.9	NaN	27245.2	27121	22590.9	22708.1	17628.3	15553.1	11870.6	14116.2	20122.1
P31415	CASQ1	Calsequestrin-1	4602180	5.14352e+06	6762451	7.09019e+06	6165175	5290124	4316868	4778336	4863502	5509708	3.37145e+06	6516511	7248295	5486309	4875065	5.8881e+06
O14958	CASQ2	Calsequestrin-2	311028	354193	399383	313913	199443	250619	313530	311781	278119	299392	240809	328829	210172	438552	329813	219792
P20810-6;P20810-7	CAST	Isoform of P20810, Isoform 6 of Calpastatin;Isoform of P20810, Isoform 7 of Calpastatin	87097.3	96525.4	52399.7	49035.7	67084.5	50567.5	33457.9	35129.5	39994.6	39714.1	23740.8	40946.4	68128.3	87681.9	44836.5	41317.1
A6NHX0	CASTOR2	Cytosolic arginine sensor for mTORC1 subunit 2	NaN	15654.8	17102.9	10107.7	19194.2	17260.4	12432.4	11564.4	7819.76	9805.76	7754.68	11645.8	15316.7	NaN	NaN	6707.62
P04040	CAT	Catalase	586864	501316	426249	586622	332646	407627	321161	221004	323604	228804	291023	458965	335757	331492	395036	298001
Q03135	CAV1	Caveolin-1	157684	106092	200423	158143	246656	219657	159003	151063	236423	207909	140877	212875	225989	315265	177000	215271
E9PCT3;P51636;P51636-2	CAV2	Isoform of P51636, Caveolin;Caveolin-2;Isoform of P51636, Isoform Beta of Caveolin-2	25996.3	26815.1	24813.4	23655.6	24905.5	24829.2	20296.2	23384	32009.4	21398.8	21425.2	31369.6	27430	41869.7	25227.5	21112.3
P56539	CAV3	Caveolin-3	50110.3	31561.7	103151	56948.9	63934.8	40319.7	40905.5	19239.7	34677.9	41349.6	21161.3	42070.1	29526.8	60246.8	49473.8	39571.8
Q6NZI2	CAVIN1	Caveolae-associated protein 1	552616	556875	658886	473339	638310	590471	413106	467786	687172	566940	408180	579012	636656	714613	546845	490406
O95810	CAVIN2	Caveolae-associated protein 2	116929	143779	145492	103601	132601	141426	93925.3	103586	133971	121309	71677.1	114246	130896	174575	105206	108085
E9PIE3;Q969G5	CAVIN3	Isoform of Q969G5, Caveolae-associated protein 3;Caveolae-associated protein 3	28233.7	16855.6	21649.1	16610.7	26129.5	17224.7	24107.7	23265.4	36779.3	41540.7	28311.6	29339.6	34040.6	24046.9	29626.9	25483.2
Q5BKX8	CAVIN4	Caveolae-associated protein 4	247518	230763	210428	208214	144231	222999	281809	280216	190811	206228	328377	215862	214436	321518	366117	220813
H3BNH2;O75081;O75081-2;O75081-4	CBFA2T3	Isoform of O75081, Protein CBFA2T3 (Fragment);Protein CBFA2T3;Isoform of O75081, Isoform 2 of Protein CBFA2T3;Isoform of O75081, Isoform 3 of Protein CBFA2T3	NaN	NaN	NaN	8630.48	12834.3	7816.64	7568.31	3582.5	4112.38	10177	9890.18	10023.1	10434.6	6281.1	NaN	14407.2
Q13951-2	CBFB	Isoform of Q13951, Isoform 2 of Core-binding factor subunit beta	NaN	NaN	10623.9	10436.3	12648.1	5896.34	5101.01	4287.22	5742.77	11706.8	4517.13	6572.98	4740.21	13934.2	3508.02	5126.4
P16152	CBR1	Carbonyl reductase [NADPH] 1	139655	124167	155057	149942	157640	140640	144936	78072.8	145885	120417	132584	188090	170177	110824	167555	79360
O75828	CBR3	Carbonyl reductase [NADPH] 3	21952.5	12919.4	15254.3	23237.7	16385	16721.4	21096.1	NaN	22229.8	10048.6	31899.1	27130.7	21767.6	22101.3	36207.8	16732.8
Q8N4T8	CBR4	Carbonyl reductase family member 4	53665	49015.4	43377.1	26358.6	72822.9	49970.6	29646	38516.8	65791.6	38758.4	33658.6	63148.2	40839.9	39241.6	53079.2	50082.3
J3KS05;P83916	CBX1	Isoform of P83916, Chromobox protein homolog 1 (Fragment);Chromobox protein homolog 1	14506.4	19220.5	44572.1	28299.5	34913	19974.9	7608.38	30320.5	NaN	45972.8	60128.6	32149.7	39408.8	41320.3	21305.6	32265.6
Q13185	CBX3	Chromobox protein homolog 3	10032.2	8823.94	9516.53	8101.57	9433.55	11703.9	8754.91	4686.01	11172	10514.9	9710.63	9616.59	12628.8	10857.4	11695.9	10793.9
P45973	CBX5	Chromobox protein homolog 5	NaN	NaN	NaN	NaN	NaN	NaN	NaN	NaN	NaN	8670.8	NaN	NaN	8671.45	3759.75	20176.1	NaN
Q6P1N0;Q6P1N0-2	CC2D1A	Coiled-coil and C2 domain-containing protein 1A;Isoform of Q6P1N0, Isoform 2 of Coiled-coil and C2 domain-containing protein 1A	2446.86	NaN	NaN	NaN	6985.59	5281.51	3279.79	2221.35	5433.47	6488.15	5649.46	NaN	4312.73	2080.12	NaN	3409.17
Q8IX12;Q8IX12-2	CCAR1	Cell division cycle and apoptosis regulator protein 1;Isoform of Q8IX12, Isoform 2 of Cell division cycle and apoptosis regulator protein 1	NaN	NaN	NaN	NaN	NaN	NaN	NaN	12361.7	10324.5	1275.25	12156.8	834.222	3024.7	10430.9	NaN	7598.84
Q8N163;Q8N163-2	CCAR2	Cell cycle and apoptosis regulator protein 2;Isoform of Q8N163, Isoform 2 of Cell cycle and apoptosis regulator protein 2	8838.03	132875	15170.9	17706.9	25999.9	15532.5	14569.9	11052.5	9138.16	113808	9498.59	16223	136765	8439.85	11077.6	4453.49
Q96CT7	CCDC124	Coiled-coil domain-containing protein 124	34669.4	38145.2	32450	27816.8	34938	45427.8	27771.4	27969.2	35334.2	31851.2	23068.1	26999.6	41288.2	56776	41236.8	25665.6
Q96BQ5	CCDC127	Coiled-coil domain-containing protein 127	NaN	NaN	NaN	NaN	NaN	NaN	NaN	NaN	NaN	NaN	NaN	NaN	NaN	NaN	NaN	1783.49
Q9BUN5	CCDC28B	Coiled-coil domain-containing protein 28B	13265.1	12697.4	NaN	NaN	19121.9	11617	9462.63	11942.4	19527	31718.6	13164.8	27849.6	22510.2	13674.5	16549.1	12371.7
Q86WV7;Q96MW1	CCDC43	Isoform of Q96MW1, CCDC43 protein;Coiled-coil domain-containing protein 43	14629.9	20984.9	25795.6	18220.9	21593.1	22329.1	12097.8	12245.4	18887.2	17749.2	10223	12595.9	20073.9	27429.8	12494.9	9492.28
Q8IVM0;Q8IVM0-2	CCDC50	Coiled-coil domain-containing protein 50;Isoform of Q8IVM0, Isoform 2 of Coiled-coil domain-containing protein 50	NaN	NaN	NaN	NaN	NaN	5500.55	3355.6	NaN	5122.54	3356.79	3145.25	5628.44	5469.03	12487.8	6823.69	3821.03
Q96ER9;Q96ER9-2	CCDC51	Coiled-coil domain-containing protein 51;Isoform of Q96ER9, Isoform 2 of Coiled-coil domain-containing protein 51	13752.4	NaN	NaN	NaN	NaN	NaN	NaN	14009.9	15592.1	12903.2	10226.1	12177.9	NaN	NaN	12560.4	6790.16
Q4VC31	CCDC58	Coiled-coil domain-containing protein 58	29904.4	28254.7	29191.1	34195	25438.8	26981.2	34943	26907.8	42506	30290.4	33124.6	37011.8	32558.8	31309.6	24523.6	31314.1
Q16204	CCDC6	Coiled-coil domain-containing protein 6	NaN	NaN	31920.9	21451.1	27443.2	NaN	NaN	NaN	NaN	5321.23	NaN	28373.2	53999.3	NaN	33562.9	48925.2
Q9Y3X0	CCDC9	Coiled-coil domain-containing protein 9	19873.1	NaN	22458.7	18604.4	NaN	19035.2	14974.9	14554	17881.1	15451.6	13107.1	23149.9	13470.9	23191	19144.7	16730.1
H0YF06;Q9GZT6;Q9GZT6-2	CCDC90B	Isoform of Q9GZT6, Coiled-coil domain-containing protein 90B, mitochondrial (Fragment);Coiled-coil domain-containing protein 90B, mitochondrial;Isoform of Q9GZT6, Isoform 2 of Coiled-coil domain-containing protein 90B, mitochondrial	4663.28	NaN	NaN	NaN	NaN	5740.43	3572.4	NaN	NaN	NaN	NaN	2722.89	NaN	5347.86	NaN	NaN
A0A0A0MTK0;A0A0A0MTP0;Q7Z6B0;Q7Z6B0-2;Q7Z6B0-3	CCDC91	Isoform of Q7Z6B0, Coiled-coil domain-containing protein 91;Isoform of Q7Z6B0, Coiled-coil domain-containing protein 91;Coiled-coil domain-containing protein 91;Isoform of Q7Z6B0, Isoform 2 of Coiled-coil domain-containing protein 91;Isoform of Q7Z6B0, Isoform 3 of Coiled-coil domain-containing protein 91	29129.5	NaN	26218.9	26235.4	NaN	15138.4	13416	1937.77	18149.1	23997.8	17060.5	29764.2	4000.87	4667.27	15501.2	23433
F8W9X7;Q567U6	CCDC93	Isoform of Q567U6, Coiled-coil domain-containing protein 93;Coiled-coil domain-containing protein 93	NaN	2871.42	7264.14	8706.19	7089.27	4410.06	7398.25	1801.87	NaN	5420.35	NaN	4210.41	8866.34	NaN	NaN	3957.7
H3BR23;O95273;O95273-2	CCNDBP1	Isoform of O95273, Cyclin-D1-binding protein 1;Cyclin-D1-binding protein 1;Isoform of O95273, Isoform 2 of Cyclin-D1-binding protein 1	4363.4	3528.39	6329.47	4599.02	8255.18	5134.89	6927.79	5092.23	4423.38	6908.88	5443.57	5139.89	7174.05	6600.23	5742.67	6275.26
J3KNF4;O14618	CCS	Isoform of O14618, Copper chaperone for superoxide dismutase;Copper chaperone for superoxide dismutase	12674.6	21705.2	32667.2	11440.1	24778.3	12109.4	10342	6488.47	7931.58	14982.8	9387.09	14304.2	36693.3	20378.6	20000.9	33604.1
Q4G0I0	CCSMST1	Protein CCSMST1	NaN	NaN	NaN	NaN	NaN	9252.62	6666.32	7676.41	10110.4	NaN	7871.04	NaN	8810.46	12185.2	7931.68	7976.34
P78371	CCT2	T-complex protein 1 subunit beta	17820.4	17836.7	23851.6	24628.9	21982.7	25425	21555.2	24667.7	24929.5	24623.1	34955.1	22926.5	28185.6	22184.9	21502.8	29692.9
P49368	CCT3	T-complex protein 1 subunit gamma	50694.9	61836.7	57690.6	72245.9	62845.8	45358.6	35616	51165.2	55572.9	58685.4	57019.8	70485.1	49255.5	50109.1	68300.2	49985.9
P50991	CCT4	T-complex protein 1 subunit delta	35634	25065.9	35727.6	29400.4	41456.1	30534.9	27183	27635.1	35035.4	37413.3	26413.4	35031.2	33032.7	25785.7	31582.7	35035.1
P48643	CCT5	T-complex protein 1 subunit epsilon	27970.2	21659.3	23461.9	20900.2	23666.3	25408.9	22488.7	27071.9	33854	8685.86	28338.5	22769.1	27161.5	6890.53	34767.9	35311.5
P40227	CCT6A	T-complex protein 1 subunit zeta	18518.1	17164.9	15526.7	14688.2	18483.9	14960.4	13629.2	14794.4	18944.7	18019	15402.3	16384.8	19347.8	16075.7	22386.5	21293.4
Q99832	CCT7	T-complex protein 1 subunit eta	22509.1	16327.8	16520.6	21485.5	21798.6	20644.5	19104.4	20304.7	22338.9	23860.9	18018.8	23212.9	27510.2	15890.2	22167.1	26261
P50990	CCT8	T-complex protein 1 subunit theta	52820.4	52260.3	56205.7	51769.7	50434.2	41990.4	54361.1	48811.8	50297.4	58004.4	45159.4	48335.6	61884.8	38512	51842.1	49389.3
F8WD66;P86790;P86791	CCZ1B;CCZ1B;CCZ1	Isoform of P86790, Vacuolar fusion protein CCZ1 homolog;Vacuolar fusion protein CCZ1 homolog B;Vacuolar fusion protein CCZ1 homolog	493994	855438	2.58381e+06	842220	1.03338e+06	1.6785e+06	553832	221106	388226	513863	135231	825244	728503	1.77287e+06	289263	378340
P08571	CD14	Monocyte differentiation antigen CD14	NaN	NaN	4762.97	3306.24	NaN	3283.03	3567.89	NaN	5363.21	19402.7	3950.48	4061.09	5138.1	8826.2	NaN	7254.99
E9PMR4;E9PRJ3;P48509	CD151	Isoform of P48509, Tetraspanin;Isoform of P48509, Tetraspanin (Fragment);CD151 antigen	5651.59	NaN	5761.99	NaN	4373.51	NaN	6649.1	5108.62	10332.1	NaN	6973.61	7943.47	9646.01	9820.76	NaN	11386.6
Q9NR16;Q9NR16-2;Q9NR16-3;Q9NR16-4	CD163L1	Scavenger receptor cysteine-rich type 1 protein M160;Isoform of Q9NR16, Isoform 2 of Scavenger receptor cysteine-rich type 1 protein M160;Isoform of Q9NR16, Isoform 3 of Scavenger receptor cysteine-rich type 1 protein M160;Isoform of Q9NR16, Isoform 4 of Scavenger receptor cysteine-rich type 1 protein M160	11038.7	NaN	5074	15223.2	NaN	7831.1	NaN	NaN	6464.44	3697.25	5742.24	15829.2	3744.21	NaN	8174.65	3197.98
Q9Y5K6	CD2AP	CD2-associated protein	NaN	NaN	6774.71	NaN	NaN	NaN	NaN	NaN	NaN	5756.25	4445.37	4254.57	8265.17	6602.66	NaN	6067.11
O95400	CD2BP2	CD2 antigen cytoplasmic tail-binding protein 2	NaN	NaN	6188.63	NaN	4523.44	NaN	4147.45	2713.83	5094.8	3801.2	5010.3	5285.62	6563.08	15986.6	NaN	5852.09
Q6UXG3;Q6UXG3-2;Q6UXG3-3;Q6UXG3-4;Q6UXG3-5	CD300LG	CMRF35-like molecule 9;Isoform of Q6UXG3, Isoform 2 of CMRF35-like molecule 9;Isoform of Q6UXG3, Isoform 3 of CMRF35-like molecule 9;Isoform of Q6UXG3, Isoform 4 of CMRF35-like molecule 9;Isoform of Q6UXG3, Isoform 5 of CMRF35-like molecule 9	3252.83	NaN	NaN	NaN	NaN	NaN	6346.79	12241.2	NaN	NaN	7520.24	NaN	16647.5	18883.4	14403.4	15555.4
P28906;Q5JTA5	CD34	Hematopoietic progenitor cell antigen CD34;Isoform of P28906, Hematopoietic progenitor cell antigen CD34	4935.88	17126.1	11988	12605.9	5337.49	5626.87	3132.48	4512.56	14005.7	12254.5	7053.18	17297.3	16342.4	24564.7	17187.1	10417.8
E7EU05;P16671	CD36	Isoform of P16671, Platelet glycoprotein 4 (Fragment);Platelet glycoprotein 4	136344	175484	148359	144764	158675	139195	147992	119976	141388	188311	86225	199354	144730	160585	138647	108229
P28907	CD38	ADP-ribosyl cyclase/cyclic ADP-ribose hydrolase 1	11745.2	18260.1	26384.2	30628.9	40216.6	27628.5	13610.3	12289.4	16081.2	22299.2	10994.9	22433	34266.3	26535.7	5105.88	21545.5
H0YD13;P16070;P16070-10;P16070-11;P16070-12;P16070-13;P16070-14;P16070-16;P16070-17;P16070-18;P16070-3;P16070-4;P16070-5;P16070-6;P16070-7;P16070-8	CD44	Isoform of P16070, CD44 antigen;CD44 antigen;Isoform of P16070, Isoform 10 of CD44 antigen;Isoform of P16070, Isoform 11 of CD44 antigen;Isoform of P16070, Isoform 12 of CD44 antigen;Isoform of P16070, Isoform 13 of CD44 antigen;Isoform of P16070, Isoform 14 of CD44 antigen;Isoform of P16070, Isoform 16 of CD44 antigen;Isoform of P16070, Isoform 17 of CD44 antigen;Isoform of P16070, Isoform 18 of…	19443.7	18592.6	16935.8	15344.1	22192.4	15012.7	9749.37	8540.98	22097.1	12233.2	14864.9	12761.9	14918.7	37018.9	24774.1	10757.3
P15529-2;P15529-3;P15529-4;P15529-5;P15529-6;P15529-7	CD46	Isoform of P15529, Isoform B of Membrane cofactor protein;Isoform of P15529, Isoform D of Membrane cofactor protein;Isoform of P15529, Isoform F of Membrane cofactor protein;Isoform of P15529, Isoform H of Membrane cofactor protein;Isoform of P15529, Isoform J of Membrane cofactor protein;Isoform of P15529, Isoform L of Membrane cofactor protein	NaN	3663.53	NaN	NaN	NaN	1950.67	NaN	2107.19	3473.69	NaN	1807.78	NaN	2687.38	NaN	NaN	791.658
B1AMW1;P19256;P19256-2;P19256-3	CD58	Isoform of P19256, CD58 antigen, (Lymphocyte function-associated antigen 3), isoform CRA_c;Lymphocyte function-associated antigen 3;Isoform of P19256, Isoform 2 of Lymphocyte function-associated antigen 3;Isoform of P19256, Isoform 3 of Lymphocyte function-associated antigen 3	NaN	NaN	5221.23	NaN	4399.88	NaN	3901.83	NaN	5593.13	3370.27	NaN	NaN	4909.96	4679.64	NaN	3783.41
E9PNW4;E9PR17;P13987	CD59	Isoform of P13987, CD59 glycoprotein;Isoform of P13987, CD59 glycoprotein;CD59 glycoprotein	138708	184555	235977	189676	250250	203413	117806	112242	140957	179196	126303	325284	230358	321950	157377	188966
F8VNT9;F8VV56;F8VWK8;F8W022;P08962;P08962-2;P08962-3	CD63	Isoform of P08962, CD63 antigen (Fragment);Isoform of P08962, CD63 antigen;Isoform of P08962, Tetraspanin (Fragment);Isoform of P08962, Tetraspanin (Fragment);CD63 antigen;Isoform of P08962, Isoform 2 of CD63 antigen;Isoform of P08962, Isoform 3 of CD63 antigen	13642.5	13293.1	4852.37	10469.5	10357.8	10859.3	8793.97	NaN	14641.1	7771.5	9502.91	7133.9	11160.4	19218.8	12628.5	11066.2
A6NMH8;E9PIF1;E9PJK1;E9PRJ8;H0YDJ9;H0YDL9;P60033	CD81	Isoform of P60033, Tetraspanin;Isoform of P60033, Tetraspanin;Isoform of P60033, Tetraspanin;Isoform of P60033, Tetraspanin (Fragment);Isoform of P60033, Tetraspanin (Fragment);Isoform of P60033, Tetraspanin (Fragment);CD81 antigen	NaN	10688.7	3686.59	66245.2	53729.3	103148	NaN	44820.6	96852.4	81535.7	39395.9	73317.4	81939.5	38759.9	92526.4	NaN
P27701;P27701-2	CD82	CD82 antigen;Isoform of P27701, Isoform 2 of CD82 antigen	NaN	NaN	8392.63	NaN	NaN	9200.3	4520.77	5683.76	5164.11	NaN	3626.73	4936.19	2898.46	21424.3	8219.08	5018.75
A6NNI4;G8JLH6;P21926	CD9	Isoform of P21926, Tetraspanin;Isoform of P21926, Tetraspanin (Fragment);CD9 antigen	NaN	10890.6	9391.49	8345.96	11417	NaN	NaN	NaN	22693.8	9756.96	NaN	10602.1	19149	70813.6	NaN	25876.4
Q9NPY3	CD93	Complement component C1q receptor	NaN	NaN	2522.08	NaN	NaN	NaN	NaN	1338.8	2664.29	2281.9	806.72	2075.23	80619.6	2752.44	2260.12	4134.6
P48960;P48960-2;P48960-3	CD97	CD97 antigen;Isoform of P48960, Isoform 2 of CD97 antigen;Isoform of P48960, Isoform 3 of CD97 antigen	NaN	NaN	NaN	NaN	NaN	NaN	4697.2	NaN	NaN	NaN	NaN	NaN	NaN	17591.9	NaN	NaN
P14209	CD99	CD99 antigen	62876.7	62265.7	167455	44150.7	60278.6	67018.1	56452.2	40670.2	71998.8	54280.5	53672.4	47816.7	75463.6	160595	101367	48762.6
A0A0U1RQT8;Q8TCZ2;Q8TCZ2-2;Q8TCZ2-3;Q8TCZ2-5	CD99L2	Isoform of Q8TCZ2, CD99 antigen-like protein 2 (Fragment);CD99 antigen-like protein 2;Isoform of Q8TCZ2, Isoform 2 of CD99 antigen-like protein 2;Isoform of Q8TCZ2, Isoform 3 of CD99 antigen-like protein 2;Isoform of Q8TCZ2, Isoform 5 of CD99 antigen-like protein 2	56889.9	37658.1	52565.8	44904.3	48965	320391	42074.5	49844.2	40319.4	41844.3	36452.2	29226.9	36696	49816.5	40959.9	27777.7
P49427	CDC34	Ubiquitin-conjugating enzyme E2 R1	NaN	NaN	NaN	NaN	NaN	14803.5	NaN	NaN	40934.9	13731.1	NaN	46106.8	19261.3	23552.5	29446.5	23082.2
Q16543	CDC37	Hsp90 co-chaperone Cdc37	60742.6	72479.1	90845.3	60939.5	86169.8	77556.9	57480.9	71514.4	80182.8	72998.1	67743.2	98704	84549.9	80517.2	88491	78855.3
B1AL69;Q7L3B6	CDC37L1	Isoform of Q7L3B6, Hsp90 co-chaperone Cdc37-like 1;Hsp90 co-chaperone Cdc37-like 1	NaN	NaN	NaN	17520.1	15008.2	14489.4	15624.8	27605.3	9216.02	21654.5	34608.5	14670.2	27669.1	18315.6	NaN	6322.56
P60953	CDC42	Cell division control protein 42 homolog	52058.3	48936.3	70154.4	67222.2	85241.6	82213	55629.6	54947.4	84452.4	90998.9	84648.7	73463.3	88800.3	96092.6	79310.5	81681.1
Q99459	CDC5L	Cell division cycle 5-like protein	20939.4	155618	284901	217295	287165	172621	165382	144326	86616.4	131736	130385	151329	221302	76188.2	134214	169693
P55290;P55290-4	CDH13	Cadherin-13;Isoform of P55290, Isoform 4 of Cadherin-13	107782	120777	134318	99539.5	121331	109145	70769.5	97982.2	96691	100155	80964	131215	106636	194267	123593	135949
P55291	CDH15	Cadherin-15	NaN	NaN	6845.84	5425	6902.12	8069.43	6641.89	NaN	6866.2	6403.62	NaN	4631.46	5770.39	8656.53	6234.43	15191.7
P33151	CDH5	Cadherin-5	12487.4	17143.5	17266.9	9925.32	10921.9	12818.1	8947.2	18883.4	16560.9	9762.91	11509.1	NaN	9152.83	11629.5	17130.3	14194.3
A0A0D9SEI3;A0A0D9SEN2;A0A0D9SER5;B7ZVY7;J3QR29;J3QR44;P21127;P21127-10;P21127-12;P21127-2;P21127-3;P21127-4;P21127-5;P21127-6;P21127-8;P21127-9;Q5QPR3;Q5QPR4;Q9UQ88;Q9UQ88-10;Q9UQ88-2;Q9UQ88-3;Q9UQ88-4;Q9UQ88-5;Q9UQ88-9	CDK11B;CDK11B;CDK11B;CDK11B;CDK11B;CDK11B;CDK11B;CDK11B;CDK11B;CDK11B;CDK11B;CDK11B;CDK11B;CDK11B;CDK11B;CDK11B;CDK11A;CDK11A;CDK11A;CDK11A;CDK11A;CDK11A;CDK11A;CDK11A;CDK11A	Isoform of P21127, Cyclin-dependent kinase 11B;Isoform of P21127, Cyclin-dependent kinase 11B;Isoform of P21127, Cyclin-dependent kinase 11B;Isoform of P21127, Cell division cycle 2-like 1 (PITSLRE proteins);Isoform of P21127, Cyclin-dependent kinase 11B;Isoform of P21127, Cyclin-dependent kinase 11B;Cyclin-dependent kinase 11B;Isoform of P21127, Isoform SV11 of Cyclin-dependent kinase 11B;Isofor…	18316.4	23963.3	134859	41942.8	71485.8	80201.3	27487.6	21243	25720	31376.7	11589.6	77603.7	84930.5	68508.9	16677.6	48860.1
Q00535;Q00535-2	CDK5	Cyclin-dependent-like kinase 5;Isoform of Q00535, Isoform 2 of Cyclin-dependent-like kinase 5	NaN	NaN	NaN	NaN	NaN	204516	NaN	967.428	NaN	1075.09	NaN	NaN	NaN	773.313	NaN	1671.25
Q96JB5	CDK5RAP3	CDK5 regulatory subunit-associated protein 3	13014.6	3238.17	NaN	52036.6	29887.5	NaN	NaN	NaN	NaN	NaN	3847.55	NaN	NaN	NaN	7601.55	16720.7
P46527	CDKN1B	Cyclin-dependent kinase inhibitor 1B	34180.4	46583.4	49183.1	22407.6	45291.6	25002.6	23172.7	15114	30136.5	33447.6	20768.7	23531.8	33267	37184.3	31316.3	14939.8
Q96HQ2;Q96HQ2-2	CDKN2AIPNL	CDKN2AIP N-terminal-like protein;Isoform of Q96HQ2, Isoform 2 of CDKN2AIP N-terminal-like protein	NaN	NaN	4178.96	NaN	NaN	NaN	NaN	1718.46	3790.05	NaN	NaN	NaN	NaN	2807.42	NaN	NaN
Q49AH0	CDNF	Cerebral dopamine neurotrophic factor	37013.9	55964.8	59185.2	38937.5	42643.3	48619.1	36584.8	49332.2	54005.4	35998.8	42051.4	35256	45914.1	57638.2	52232.4	37489.8
O95674	CDS2	Phosphatidate cytidylyltransferase 2	5651.04	NaN	NaN	1186.66	4110.23	3354.45	4263.75	4680.62	6563.15	4274.6	5395.2	3937.07	6780.69	5158.8	6510.96	6642.88
Q9UKY7	CDV3	Protein CDV3 homolog	47724.7	42924.2	76981.3	66957.5	77185	60818.1	59098.2	50743.8	60709	48665.3	48777.5	83860.4	77802.9	131587	54209.2	55143.9
P49454	CENPF	Centromere protein F	15830.8	31173.8	NaN	NaN	2596.6	13925.4	3178.51	NaN	NaN	NaN	5131.08	NaN	4711.01	34269.9	77683.1	NaN
Q7Z7K6	CENPV	Centromere protein V	20344.2	24314.9	16414.2	43794.6	11502.9	20826.5	14206.1	16447.7	22932.9	27423	16423.1	13438.2	17676.6	21023.2	13694.4	15439.6
Q5VT06	CEP350	Centrosome-associated protein 350	NaN	NaN	44832.2	103088	11663.7	NaN	NaN	NaN	NaN	NaN	NaN	68030.9	NaN	NaN	NaN	NaN
P23141;P23141-2;P23141-3	CES1	Liver carboxylesterase 1;Isoform of P23141, Isoform 2 of Liver carboxylesterase 1;Isoform of P23141, Isoform 3 of Liver carboxylesterase 1	NaN	34568.4	NaN	6539.08	NaN	NaN	NaN	NaN	NaN	NaN	NaN	NaN	NaN	NaN	NaN	18772.5
A0A024R6X1;O00748	CES2	Isoform of O00748, Carboxylic ester hydrolase;Cocaine esterase	67486.7	79917.1	61518.1	60821	52503.3	104293	85081.1	48024.2	93337.6	85087.3	55815.9	128039	74498.4	136096	96138.6	66238.6
P08603	CFH	Complement factor H	69833.4	65517.7	56080.7	96352.6	61785.8	43541.7	41686	33379.1	54860.8	44225.6	37613.1	66958.3	52812.1	39690.7	60228.6	48920.8
B1AKG0;Q03591	CFHR1	Isoform of Q03591, Complement factor H-related protein 1;Complement factor H-related protein 1	5383.95	NaN	NaN	NaN	NaN	NaN	NaN	5527.3	7333.91	NaN	NaN	NaN	NaN	6720.43	4480.92	9379.67
E7ETH0;G3XAM2;P05156	CFI	Isoform of P05156, Complement factor I;Isoform of P05156, Complement factor I;Complement factor I	9232.05	8214.96	7143.67	13301.4	7504.8	6002.5	6648.73	4426.69	7590.86	8435.2	3282.82	7638.38	7869.29	9315.83	4761.73	5087.4
E9PK25;P23528	CFL1	Isoform of P23528, Cofilin-1;Cofilin-1	490187	487672	399160	363756	382215	448685	488695	457848	485959	395679	551444	368463	392517	546396	566942	394415
Q9Y281	CFL2	Cofilin-2	597353	801641	531728	421117	590018	898591	671943	718441	659058	648621	922330	676223	745986	623136	726770	725994
Q96BP2	CHCHD1	Coiled-coil-helix-coiled-coil-helix domain-containing protein 1	67091.4	76736.3	120666	NaN	NaN	94586.1	NaN	67793.1	109908	75891.1	100318	90618.3	76375.2	96287.4	85771.4	96925.2
B5MBW9;Q8WYQ3	CHCHD10	Isoform of Q8WYQ3, Coiled-coil-helix-coiled-coil-helix domain-containing protein 10, mitochondrial;Coiled-coil-helix-coiled-coil-helix domain-containing protein 10, mitochondrial	175409	88800.4	59198.1	93044.3	73802.5	170136	NaN	104185	122885	170046	182034	119333	140542	164614	154504	228371
Q9Y6H1	CHCHD2	Coiled-coil-helix-coiled-coil-helix domain-containing protein 2	388209	109421	112581	215191	106405	128601	70009.3	81903	134392	133311	100601	145375	126298	265047	83788.6	272816
C9JRZ6;Q9NX63	CHCHD3	Isoform of Q9NX63, MICOS complex subunit;MICOS complex subunit MIC19	699434	572359	655545	575670	541529	601335	530178	695533	870595	789982	580380	914948	605601	597839	544945	812408
Q8N4Q1;Q8N4Q1-2	CHCHD4	Mitochondrial intermembrane space import and assembly protein 40;Isoform of Q8N4Q1, Isoform 2 of Mitochondrial intermembrane space import and assembly protein 40	45331.1	47459.9	47579	35957.1	49424	58820.7	28242	34590.9	76439.5	75040.4	30656	34673.3	32661.1	90570	39014.9	17692.9
F8WC14;Q9BSY4;Q9BSY4-2	CHCHD5	Isoform of Q9BSY4, Coiled-coil-helix-coiled-coil-helix domain-containing protein 5;Coiled-coil-helix-coiled-coil-helix domain-containing protein 5;Isoform of Q9BSY4, Isoform 2 of Coiled-coil-helix-coiled-coil-helix domain-containing protein 5	NaN	NaN	NaN	1898.29	NaN	4670.25	NaN	4779.09	9264.49	NaN	7180.25	NaN	NaN	22220.5	3889.75	9974.76
H0Y922;J3QTA6;Q9BRQ6	CHCHD6	Isoform of Q9BRQ6, MICOS complex subunit (Fragment);Isoform of Q9BRQ6, MICOS complex subunit;MICOS complex subunit MIC25	NaN	NaN	79041.2	NaN	NaN	NaN	NaN	NaN	NaN	85551.1	NaN	119154	NaN	NaN	NaN	100853
J3KPV1;Q9BUK0;Q9BUK0-2;Q9BUK0-4	CHCHD7	Isoform of Q9BUK0, Coiled-coil-helix-coiled-coil-helix domain-containing protein 7;Coiled-coil-helix-coiled-coil-helix domain-containing protein 7;Isoform of Q9BUK0, Isoform 2 of Coiled-coil-helix-coiled-coil-helix domain-containing protein 7;Isoform of Q9BUK0, Isoform 4 of Coiled-coil-helix-coiled-coil-helix domain-containing protein 7	22553.7	16841	4257.3	NaN	NaN	28849	14939.2	18500.9	16314.9	29905.8	10417	13421.5	NaN	17128.1	28685.5	23794.5
F8VUA2;Q9HD42	CHMP1A	Isoform of Q9HD42, Charged multivesicular body protein 1a;Charged multivesicular body protein 1a	5058.3	NaN	NaN	2873.77	NaN	NaN	4861.15	4877.58	5205.13	3522.3	4228.23	4078.28	5113.74	10504.4	4738.65	5138.33
Q7LBR1	CHMP1B	Charged multivesicular body protein 1b	9835.79	8641.17	16664.9	NaN	27764.3	NaN	20660.6	NaN	NaN	14535.9	14454.1	29394.5	24871.2	18558.9	10603.2	30956.9
M0R1T5;O43633	CHMP2A	Isoform of O43633, Charged multivesicular body protein 2a (Fragment);Charged multivesicular body protein 2a	33359.1	NaN	20203.1	16069.8	23760.3	39104.9	25923.5	29391.5	35719.9	17933.4	25092.2	17809.3	24945.6	21910.1	29482.8	35365.3
C9J0A7;Q9UQN3;Q9UQN3-2	CHMP2B	Isoform of Q9UQN3, Charged multivesicular body protein 2b;Charged multivesicular body protein 2b;Isoform of Q9UQN3, Isoform 2 of Charged multivesicular body protein 2b	8759.29	5101.21	NaN	4028.19	7557.31	NaN	NaN	NaN	NaN	10625.4	NaN	11137.6	12135	17422.8	10646.3	10232.5
Q9Y3E7;Q9Y3E7-2;Q9Y3E7-3;Q9Y3E7-4	CHMP3	Charged multivesicular body protein 3;Isoform of Q9Y3E7, Isoform 2 of Charged multivesicular body protein 3;Isoform of Q9Y3E7, Isoform 3 of Charged multivesicular body protein 3;Isoform of Q9Y3E7, Isoform 4 of Charged multivesicular body protein 3	19186.2	12253.2	14515.5	12786.3	19670.5	21277.5	14843.6	10404.8	12688.3	16798.6	10223.5	16250.4	22868.9	13151.9	12673.6	17213.2
Q9BY43;Q9BY43-2	CHMP4A	Charged multivesicular body protein 4a;Isoform of Q9BY43, Isoform 2 of Charged multivesicular body protein 4a	8618.21	13592.3	7996.5	NaN	NaN	8706.92	4308.61	10663	9400.74	42935.7	6534.09	19731.3	14701	16837.4	NaN	11059.3
Q9H444	CHMP4B	Charged multivesicular body protein 4b	116112	156857	149893	136313	153002	168405	111853	108488	146143	134735	95705.7	167158	182443	252308	141884	137980
Q9NZZ3	CHMP5	Charged multivesicular body protein 5	NaN	NaN	56052.3	55624.2	NaN	67659.6	35880.7	NaN	61075.7	36012.2	27129.1	50263.6	54755.4	88657.2	36735	45389
I3L4A1;Q96FZ7	CHMP6	Isoform of Q96FZ7, Charged multivesicular body protein 6 (Fragment);Charged multivesicular body protein 6	74774.6	19808.1	15079.3	26243.1	30623.7	96934.9	25450.8	21938.1	74633.3	24652.2	12186.3	89778.2	140887	13113.6	90451.8	33010.5
Q9UHD1	CHORDC1	Cysteine and histidine-rich domain-containing protein 1	NaN	18333.7	13124	23693	17837.6	17021.1	16480.8	16634.5	11743.5	13665.6	NaN	17611.7	13751.5	16555.5	8851.95	13095.6
Q99653	CHP1	Calcineurin B homologous protein 1	41424.2	90773.5	81668	28804.1	73535.5	34281.8	25036	26492.9	31182	59178.9	26027.2	61895	66190	70538.9	28838.7	58391.1
A0A087X1B7;Q9Y3Y2;Q9Y3Y2-3;Q9Y3Y2-4;X6R700	CHTOP	Isoform of Q9Y3Y2, Chromatin target of PRMT1 protein;Chromatin target of PRMT1 protein;Isoform of Q9Y3Y2, Isoform 2 of Chromatin target of PRMT1 protein;Isoform of Q9Y3Y2, Isoform 3 of Chromatin target of PRMT1 protein;Isoform of Q9Y3Y2, Chromatin target of PRMT1 protein	18968.1	19621.7	36020.1	25053.5	29233.8	28804	25503.4	11174.2	21296.9	22565.6	22439.1	23245.1	24652.2	22744.1	20851.2	21810.9
O76071	CIAO1	Probable cytosolic iron-sulfur protein assembly protein CIAO1	7885.74	4506.47	6657.27	5818.4	7477.39	7810.6	4900.71	5771.6	8567.06	5812.21	5255.58	3933.28	8463.74	9253.09	7693.05	NaN
Q6FI81;Q6FI81-3	CIAPIN1	Anamorsin;Isoform of Q6FI81, Isoform 3 of Anamorsin	20085.1	21548.6	18094.7	16846.4	17620.2	18598.2	20154.1	21579.2	39081.9	21512.8	20113	32601.7	36745.4	36124.2	25855.2	34820.7
O75339	CILP	Cartilage intermediate layer protein 1	5394.21	3893.84	NaN	5765.29	6398.13	6491.31	2462.32	7919.52	4199.24	4508.52	4547.94	4795.38	6066.04	7226.36	9264.69	7180.68
Q14011	CIRBP	Cold-inducible RNA-binding protein	63077.6	87983.6	82565	77330.7	79371.6	75825.1	78048	68950.7	61350.3	60278.2	72102.2	61006.3	73443.5	124547	87528.3	57672.5
Q9NZ45	CISD1	CDGSH iron-sulfur domain-containing protein 1	366844	274677	264089	192185	214594	335995	246937	306593	413391	359139	305808	255180	271618	243338	366076	365241
Q8N5K1	CISD2	CDGSH iron-sulfur domain-containing protein 2	65369.4	35007.1	28859.2	NaN	36239.7	7509.05	23785.8	21776.1	28073.3	38362.1	31797.8	20634.4	46843.1	75767.6	41037.6	35624.6
Q07065	CKAP4	Cytoskeleton-associated protein 4	10918.1	5421.13	14996.9	9961.92	19236.4	14009.6	9935.91	8108.28	14870.2	5312.65	9912.86	5429.99	21929.5	37708.1	14250.5	14699.3
P12277	CKB	Creatine kinase B-type	117831776	111716912	131802672	178567872	144487840	58625056	58058668	53393384	62981540	127859696	56095856	96701200	127014176	44132044	51321100	113146040
P06732	CKM	Creatine kinase M-type	180601200	121088352	224450896	202500000	202544064	138426464	119927424	147772512	171445056	109385312	123750392	168982912	177032480	127603832	139959680	155402656
P17540	CKMT2	Creatine kinase S-type, mitochondrial	15286894	10938882	19758154	19551448	5.56198e+06	12699614	17201790	14623020	20858926	20012964	18285994	15833077	14910752	13630213	16429223	18109710
F8WA11;Q7Z460;Q7Z460-2;Q7Z460-3;Q7Z460-4;Q7Z460-5	CLASP1	Isoform of Q7Z460, CLIP-associating protein 1;CLIP-associating protein 1;Isoform of Q7Z460, Isoform 2 of CLIP-associating protein 1;Isoform of Q7Z460, Isoform 3 of CLIP-associating protein 1;Isoform of Q7Z460, Isoform 4 of CLIP-associating protein 1;Isoform of Q7Z460, Isoform 5 of CLIP-associating protein 1	2857.97	NaN	NaN	1420.28	NaN	NaN	NaN	NaN	NaN	5012.77	2078.2	NaN	NaN	NaN	1149.01	3066.07
A0A0U1RQI6;E3W994;E7ERI8;E7EW49;J3KR49;O75122;O75122-3	CLASP2	Isoform of O75122, CLIP-associating protein 2;Isoform of O75122, CLIP-associating protein 2;Isoform of O75122, CLIP-associating protein 2;Isoform of O75122, CLIP-associating protein 2;Isoform of O75122, CLIP-associating protein 2;CLIP-associating protein 2;Isoform of O75122, Isoform 3 of CLIP-associating protein 2	8483.7	NaN	4623.05	NaN	6817.44	1479.78	4709.09	2127.54	4778.33	8050.93	1965.67	7464.52	3993.21	14909.4	4544.75	5372.46
Q96S66;Q96S66-2;Q96S66-3;Q96S66-4	CLCC1	Chloride channel CLIC-like protein 1;Isoform of Q96S66, Isoform 2 of Chloride channel CLIC-like protein 1;Isoform of Q96S66, Isoform 3 of Chloride channel CLIC-like protein 1;Isoform of Q96S66, Isoform 4 of Chloride channel CLIC-like protein 1	3675.55	NaN	6197.41	5506.47	6855.94	4424.53	4825.88	23344.2	4574.92	4779.03	3242.24	4677.3	5262.48	5842.25	3701.11	4559.48
E9PHK0;P05452	CLEC3B	Isoform of P05452, Tetranectin;Tetranectin	23315.2	13985.6	29945.9	26497.5	38705.1	18335.1	12560.7	10502.8	19693.9	12828	9601.85	22402.9	16122.1	22944	16943.7	17122.1
O00299	CLIC1	Chloride intracellular channel protein 1	78673.5	58887.2	54308.1	66346.8	59782	56002.4	42541.2	57220.2	78624.8	53031.8	58240	75775.4	52338.2	70356.8	58722.4	56109.3
A6PVS0;O15247	CLIC2	Isoform of O15247, Chloride intracellular channel 2 (Fragment);Chloride intracellular channel protein 2	NaN	NaN	NaN	NaN	NaN	2108.07	NaN	NaN	46090.9	NaN	4206.41	NaN	NaN	NaN	6524.6	NaN
Q9Y696	CLIC4	Chloride intracellular channel protein 4	21382	24583.3	19861.5	19892.8	21843.8	15789.1	15523.1	19074.6	28645.2	22099	20758.8	21679.7	30664	36723.6	26127.9	21126.3
Q9NZA1;Q9NZA1-2	CLIC5	Chloride intracellular channel protein 5;Isoform of Q9NZA1, Isoform 1 of Chloride intracellular channel protein 5	95959.6	92533.1	86424.4	93025.6	107266	90524.2	104263	84158.2	90348.1	95293	81271.7	74703.1	96759.7	63384.6	75846.4	71073.1
Q14677	CLINT1	Clathrin interactor 1	16768.9	5754.16	18672	48762.4	8834.81	21133.5	19392.7	14588	12071.3	14933.1	6733.43	50251.8	16697.2	26534.5	13343.4	17995.3
Q14677-2	CLINT1	Isoform of Q14677, Isoform 2 of Clathrin interactor 1	NaN	NaN	NaN	NaN	NaN	NaN	NaN	NaN	NaN	NaN	NaN	NaN	NaN	5981.63	NaN	NaN
P30622	CLIP1	CAP-Gly domain-containing linker protein 1	64722.5	71627.1	84489.8	74158.9	91852.7	66095.9	55333.1	37817.3	51609.6	49078.2	48163	56799.3	67262.3	69669.2	51202.9	37885.2
E9PMI6;J3KN38;P54105	CLNS1A	Isoform of P54105, Methylosome subunit pICln;Isoform of P54105, Methylosome subunit pICln;Methylosome subunit pICln	30283.5	80128.7	170952	66922.7	117043	61277.1	26735	9783.17	37612.1	39195.6	25090.9	57953.4	70084.2	75136.5	9194.01	31140.1
M0R208;Q16740	CLPP	Isoform of Q16740, ATP-dependent Clp protease proteolytic subunit;ATP-dependent Clp protease proteolytic subunit, mitochondrial	15868.6	NaN	78805.6	13784	16136.6	38762.7	8274.66	6646.66	42262.3	45775.4	21554.9	20567.9	21228	41998.4	66907.8	45290.7
K7EQQ1;O96005;O96005-4	CLPTM1	Isoform of O96005, Cleft lip and palate transmembrane protein 1 (Fragment);Cleft lip and palate transmembrane protein 1;Isoform of O96005, Isoform 3 of Cleft lip and palate transmembrane protein 1	NaN	NaN	NaN	NaN	NaN	NaN	12269.2	NaN	11147.7	9665.27	8810.08	NaN	13341.5	25411.2	29997.9	51221.5
O76031	CLPX	ATP-dependent Clp protease ATP-binding subunit clpX-like, mitochondrial	NaN	NaN	NaN	NaN	NaN	NaN	NaN	NaN	1894.98	3979.62	2195.88	3892.61	NaN	NaN	1307.14	841.586
P09497;P09497-2	CLTB	Clathrin light chain B;Isoform of P09497, Isoform Non-brain of Clathrin light chain B	38364.4	48660.2	49459.6	36082.7	53775.8	55859.5	39950.4	36377	65443.4	47183.6	37867	56536.9	59172.2	113554	50019.7	47781.5
A0A087WVQ6;Q00610;Q00610-2	CLTC	Isoform of Q00610, Clathrin heavy chain;Clathrin heavy chain 1;Isoform of Q00610, Isoform 2 of Clathrin heavy chain 1	46825.8	39240.4	44646.4	39694.1	44159	34696.3	32895.9	37345.5	51997.4	42847.7	45978.7	48234.1	50449.8	43227	51147.5	45358.6
P10909;P10909-2;P10909-4;P10909-5	CLU	Clusterin;Isoform of P10909, Isoform 2 of Clusterin;Isoform of P10909, Isoform 4 of Clusterin;Isoform of P10909, Isoform 5 of Clusterin	137653	148764	92916.2	132947	103704	98292.3	72702.1	84685.9	92962.7	87806.5	93181.8	87979.4	104266	178912	130751	103498
I3L2B0	CLUH	Isoform of O75153, Clustered mitochondria protein homolog (Fragment)	16863.4	22455.3	19830.2	NaN	NaN	19447.1	16773.4	NaN	NaN	23357.7	NaN	14959.7	NaN	NaN	21597.4	24563.1
K7EIG1	CLUH	Isoform of O75153, Clustered mitochondria protein homolog (Fragment)	7829.32	9653.41	6624.52	4282.68	6110.5	5666.64	6048.48	6968.61	9189.6	9942.3	7233.25	6860.02	8663.93	6234.26	6790.34	11787.3
Q8N0X4	CLYBL	Citramalyl-CoA lyase, mitochondrial	35207.6	25666.6	18001.1	6782.58	28395.1	19318.4	NaN	6662.33	63477.7	35459.2	25478.2	17535.1	39085	16913	NaN	7896.56
P23946;P23946-2	CMA1	Chymase;Isoform of P23946, Isoform 2 of Chymase	115212	21922.5	32719.6	15567	NaN	7922.27	11197.9	26345.8	NaN	NaN	21287.8	21090	1.65463e+06	NaN	23711.6	10318.1
Q8NFW8	CMAS	N-acylneuraminate cytidylyltransferase	13989.9	4875.69	NaN	NaN	20716.1	NaN	1917.4	9963.73	5004.09	13892.3	7181.03	1724.47	2439.26	6436.19	11369.4	1466.98
Q96DG6	CMBL	Carboxymethylenebutenolidase homolog	335926	401454	655568	675814	586109	499704	373381	384218	408746	442340	287002	699266	471340	257677	310523	430464
Q7Z7K0	CMC1	COX assembly mitochondrial protein homolog	156750	125349	174758	135105	131857	152577	125149	131789	136225	115517	187099	255481	106227	179713	90351.3	166717
H3BPP2;Q9NRP2	CMC2	Isoform of Q9NRP2, COX assembly mitochondrial protein;COX assembly mitochondrial protein 2 homolog	NaN	50762.1	NaN	NaN	65370.1	NaN	73086.6	NaN	146459	113034	47700.9	6583.02	50397	184953	NaN	145559
P56277	CMC4	Cx9C motif-containing protein 4	NaN	NaN	NaN	88405.9	NaN	NaN	NaN	NaN	NaN	107684	75237.9	51635.4	NaN	74613.5	NaN	94295.1
P30085	CMPK1	UMP-CMP kinase	68572.4	51425	73705.5	76820.2	71274	79350	69486.3	74414.6	89358.9	73261.2	70721.6	88269.5	84872.3	129137	87734.4	90172
Q5EBM0;Q5EBM0-2;Q5EBM0-3;Q5EBM0-4	CMPK2	UMP-CMP kinase 2, mitochondrial;Isoform of Q5EBM0, Isoform 2 of UMP-CMP kinase 2, mitochondrial;Isoform of Q5EBM0, Isoform 3 of UMP-CMP kinase 2, mitochondrial;Isoform of Q5EBM0, Isoform 4 of UMP-CMP kinase 2, mitochondrial	54229	NaN	38151.2	34060.5	37916.7	37931.1	54064.7	51901.3	58700.2	32422.3	29274.8	67978.6	38528.5	58583.5	67584.4	73829.2
Q8N3K9	CMYA5	Cardiomyopathy-associated protein 5	34982.6	24380.3	22381.4	24431.1	23897	24835.5	16746.5	27777.4	38093.6	29393.7	30687.1	26856	30105	35768.4	24764.6	30495.6
P62633-4;P62633-8	CNBP	Isoform of P62633, Isoform 4 of Cellular nucleic acid-binding protein;Isoform of P62633, Isoform 8 of Cellular nucleic acid-binding protein	29777.3	20753.9	45233.8	44071.4	43643.1	47698.5	42317.9	36557.7	32252.8	37996.4	29723.3	34868	37229.4	39907.2	23920	26884.6
P62633;P62633-2	CNBP	Cellular nucleic acid-binding protein;Isoform of P62633, Isoform 2 of Cellular nucleic acid-binding protein	48646.4	95992.6	119386	92144	116854	117854	93061.9	53440.1	88498	90819.5	85337.3	108057	114514	115807	50742.8	81504.5
Q96KP4	CNDP2	Cytosolic non-specific dipeptidase	54282.6	72656.5	61264	53689.1	74016.2	66093.8	51566.7	39369.2	55651.1	58544.9	39286.5	57797.8	63958.1	65415.7	52523.5	45796
A6NLH6;Q9P003	CNIH4	Isoform of Q9P003, Protein cornichon homolog 4;Protein cornichon homolog 4	81404.7	80007.3	27802.2	37555.9	34583	NaN	28676.9	106804	22436.1	18018.1	NaN	18779.1	18765.3	NaN	75792.8	NaN
P51911	CNN1	Calponin-1	19311	17680.5	15894.5	11951.9	25516.5	33318.5	50278.3	10563	38131.7	23876.9	18016.9	44081.7	28372.4	20968	39559.2	10220.5
Q15417;Q15417-3	CNN3	Calponin-3;Isoform of Q15417, Isoform 3 of Calponin-3	24636.7	25977.1	5326.91	14484.5	20233.7	NaN	7496.51	32722.1	10615.7	5509.16	5009.85	NaN	18643.6	16141	10469.9	9393.84
B8ZZB8;Q96F85;Q96F85-2	CNRIP1	Isoform of Q96F85, CB1 cannabinoid receptor-interacting protein 1;CB1 cannabinoid receptor-interacting protein 1;Isoform of Q96F85, Isoform 2 of CB1 cannabinoid receptor-interacting protein 1	18482.1	NaN	NaN	NaN	NaN	17915.7	13950.3	11296	17700.4	NaN	11671.6	NaN	32343.7	10689.3	15232.2	16751.3
Q6PJW8	CNST	Consortin	NaN	9185.6	4792.15	2594.79	7078.76	5163.6	NaN	4195.16	6473.96	5712.43	NaN	5213.05	5811.76	NaN	4414.12	8516.93
Q9NXG0;Q9NXG0-2	CNTLN	Centlein;Isoform of Q9NXG0, Isoform 2 of Centlein	17970.5	NaN	24027.1	27254.6	45711.9	44889.4	25024.1	24873	34959.8	NaN	17195.7	19307.2	44669.2	47973.8	20913	38139.6
Q9Y2R0	COA3	Cytochrome c oxidase assembly factor 3 homolog, mitochondrial	15312.9	19934.3	10267.6	1407.82	7878.88	12424	12433.1	15060.9	48213.5	17796.5	27014.6	17751.7	19197.2	17818.8	27320	19438.7
Q9NYJ1;Q9NYJ1-2	COA4	Cytochrome c oxidase assembly factor 4 homolog, mitochondrial;Isoform of Q9NYJ1, Isoform 2 of Cytochrome c oxidase assembly factor 4 homolog, mitochondrial	141569	136986	163557	157992	112671	167832	100126	109083	185972	127629	139481	160937	140391	232292	92042.4	135851
B9A057;Q86WW8	COA5	Isoform of Q86WW8, Cytochrome c oxidase assembly factor 5;Cytochrome c oxidase assembly factor 5	NaN	NaN	6582.45	3935.66	6522.28	NaN	NaN	NaN	3697.65	7834.01	NaN	5802.67	5304.62	4275.11	NaN	NaN
Q5JTJ3;Q5JTJ3-2;Q5JTJ3-3;X6R5Z6	COA6	Cytochrome c oxidase assembly factor 6 homolog;Isoform of Q5JTJ3, Isoform 2 of Cytochrome c oxidase assembly factor 6 homolog;Isoform of Q5JTJ3, Isoform 3 of Cytochrome c oxidase assembly factor 6 homolog;Isoform of Q5JTJ3, Cytochrome c oxidase assembly factor 6 homolog	242517	233464	395248	224608	251282	351339	199194	241230	405327	337549	185967	331723	328051	428347	189678	336068
Q96BR5	COA7	Cytochrome c oxidase assembly factor 7	8209.43	5779.26	5106.25	7706.98	6841.5	9210.02	7794.16	9808.33	225372	11403.6	8654	6646.03	10159.4	470028	9638.16	13543.1
Q13057;Q13057-2	COASY	Bifunctional coenzyme A synthase;Isoform of Q13057, Isoform 2 of Bifunctional coenzyme A synthase	17802.1	15630.4	21506.4	16728.3	21817	22714.5	16281.7	19138.4	21024.3	16701.2	16318.5	18983.9	20865	15127.8	24091.9	19636.6
A0A0J9YWK3	COBL	Isoform of O75128, Protein cordon-bleu	30987.6	28164	35113.7	32395.9	46690.5	27161.3	25995.4	33547	38708.9	38981.1	33355.2	22631.4	46869	37455.9	36359	25975.2
Q05707;Q05707-2	COL14A1	Collagen alpha-1(XIV) chain;Isoform of Q05707, Isoform 2 of Collagen alpha-1(XIV) chain	9913.99	NaN	NaN	NaN	43567	NaN	NaN	NaN	13004.9	5372.65	NaN	NaN	1151.02	29928.1	12847.6	NaN
A0A087X0K0;P39059	COL15A1	Isoform of P39059, Collagen alpha-1(XV) chain;Collagen alpha-1(XV) chain	96438.3	82924.8	77064.3	78990.8	78251	68501.1	66602	62810.3	74808.4	73254.5	68917.8	80595.5	87883.9	82686.8	132369	93133.4
P39060;P39060-1;P39060-2	COL18A1	Collagen alpha-1(XVIII) chain;Isoform of P39060, Isoform 2 of Collagen alpha-1(XVIII) chain;Isoform of P39060, Isoform 3 of Collagen alpha-1(XVIII) chain	45977.8	33856	70510.3	55242.3	66744.8	43962.2	46570.1	55666.7	62351.9	49659	57077.5	69187	57619.3	42012.8	92437.2	69979.3
P02452	COL1A1	Collagen alpha-1(I) chain	2203214	1213756	1.19672e+06	1171139	1.4282e+06	1093242	1.33021e+06	1.24865e+06	2.06838e+06	1.32735e+06	1.18395e+06	1559926	1.43185e+06	6.82326e+06	2.83272e+06	1.46696e+06
A0A087WTA8;P08123	COL1A2	Isoform of P08123, Collagen alpha-2(I) chain;Collagen alpha-2(I) chain	723995	362982	362014	366029	491102	404207	419541	416636	693505	422561	477257	547721	540333	2.34731e+06	995767	599096
P02461	COL3A1	Collagen alpha-1(III) chain	256572	329663	212044	209922	258899	259410	262224	269783	283544	172604	264203	205961	210545	693368	442364	264139
P02462;P02462-2	COL4A1	Collagen alpha-1(IV) chain;Isoform of P02462, Isoform 2 of Collagen alpha-1(IV) chain	13398.1	15397.7	27300.7	24020.1	25757.9	26739.3	26698.7	17185.1	19231.5	21430.7	14863.4	22633.3	20630.5	24682.1	26603.3	21729.4
P08572	COL4A2	Collagen alpha-2(IV) chain	115334	71293.3	63194	51464.4	71745.3	94984.8	57561.6	54347.8	60705.4	46964	40459.7	72389.9	64035	134870	63273.5	49371.7
Q9Y5P4;Q9Y5P4-2;Q9Y5P4-3	COL4A3BP	Collagen type IV alpha-3-binding protein;Isoform of Q9Y5P4, Isoform 2 of Collagen type IV alpha-3-binding protein;Isoform of Q9Y5P4, Isoform 3 of Collagen type IV alpha-3-binding protein	4771.76	NaN	NaN	NaN	NaN	5957.98	3902.62	4611.99	4777.32	NaN	5416.35	NaN	23920.2	5073.79	6275.48	5364.62
A0A087WXW9;P20908	COL5A1	Isoform of P20908, Collagen alpha-1(V) chain;Collagen alpha-1(V) chain	37371	23814.1	37840.3	26366.5	47676.7	22752.8	18254.5	27065.7	31900.3	21232.1	27331.6	45342.4	43082.1	73383.7	41701.7	36959.6
P05997	COL5A2	Collagen alpha-2(V) chain	68099.5	44579.4	81470.2	44384.7	74139.2	46634	57789.7	85242.6	69366.6	43111	42750.7	70246.8	58943.9	145604	94267.1	69733.4
A0A087X0S5;P12109	COL6A1	Isoform of P12109, Collagen alpha-1(VI) chain;Collagen alpha-1(VI) chain	83671.8	81567.3	81299.2	91368.4	73317.1	90704.6	81050.3	96225.6	65843.5	75318.4	75774.8	73935.7	58035.9	99062.9	100488	73227.1
P12110	COL6A2	Collagen alpha-2(VI) chain	272446	348945	249864	247761	238161	230945	211047	334738	191538	216728	235288	200501	148712	352438	331046	200007
C9JNG9	COL6A3	Isoform of P12111, Collagen alpha-3(VI) chain (Fragment)	NaN	21651.3	NaN	NaN	22355.3	NaN	NaN	NaN	NaN	25373.4	32715.8	22736.8	20186.5	37977.2	62147.6	26201.7
P12111;P12111-2	COL6A3	Collagen alpha-3(VI) chain;Isoform of P12111, Isoform 2 of Collagen alpha-3(VI) chain	310421	277613	216426	226350	266776	211126	239829	307672	214525	203247	256785	175318	161555	253616	319743	197891
Q9UBI1	COMMD3	COMM domain-containing protein 3	7358.94	3158.84	6622.4	7696.08	6796.11	4017.31	5930.17	51365.9	50733.2	7806.69	10525.4	6807.1	8094.58	8934.38	4859.71	8429.97
H0YEQ6;Q9GZQ3	COMMD5	Isoform of Q9GZQ3, COMM domain-containing protein 5 (Fragment);COMM domain-containing protein 5	NaN	NaN	42086.6	NaN	NaN	67944.1	NaN	17129.8	29706.5	NaN	NaN	NaN	NaN	32655.1	NaN	NaN
Q9P000	COMMD9	COMM domain-containing protein 9	2778.72	2878.45	10769.6	NaN	8562.79	21424.6	12909.4	NaN	6590.84	NaN	NaN	NaN	53167.1	6805.35	5699.7	3508.58
P21964;P21964-2	COMT	Catechol O-methyltransferase;Isoform of P21964, Isoform Soluble of Catechol O-methyltransferase	53294.1	59930.9	72777	42155.7	58296.6	58601.3	49477.3	45689.2	81841.6	43841.2	50185.3	41559.1	44621.3	61887.8	41741.1	33573
Q86VU5;R4GNF4	COMTD1	Catechol O-methyltransferase domain-containing protein 1;Isoform of Q86VU5, Catechol O-methyltransferase domain-containing protein 1 (Fragment)	NaN	NaN	NaN	NaN	NaN	NaN	35086.1	45312.6	52152.5	17876.4	35671	11859.1	6811.94	25548.4	14899.4	37133.6
P53621;P53621-2	COPA	Coatomer subunit alpha;Isoform of P53621, Isoform 2 of Coatomer subunit alpha	4902.19	6184.15	9101.22	5819.27	87977.8	113246	16613.4	67944.1	72240.9	7335.89	53866.2	10789.9	9028.41	10920.3	97838.1	9250.84
P53618	COPB1	Coatomer subunit beta	NaN	NaN	6186.3	4588.74	5294.1	3454.46	9039.9	6835.39	9670.35	5156.01	6233.59	32536.5	5623.12	7897.71	8859.29	5868.71
P35606;P35606-2	COPB2	Coatomer subunit beta';Isoform of P35606, Isoform 2 of Coatomer subunit beta'	1913.59	NaN	70164.8	2817.67	76672	2722.6	24595.7	1715.58	10188.6	129316	2817.3	85754.1	3314.41	4745.2	4416.12	4601.75
M0QXB4;O14579;O14579-2	COPE	Isoform of O14579, Coatomer protein complex, subunit epsilon, isoform CRA_g;Coatomer subunit epsilon;Isoform of O14579, Isoform 2 of Coatomer subunit epsilon	6687.73	NaN	14064.4	NaN	NaN	4583.38	3433.34	8235.3	NaN	12780.4	19708.4	10804.3	10998.9	NaN	22270.3	22779.1
H9KV77;J3QRX6;Q9NQ92	COPRS	Isoform of Q9NQ92, Coordinator of PRMT5 and differentiation stimulator;Isoform of Q9NQ92, Coordinator of PRMT5 and differentiation stimulator (Fragment);Coordinator of PRMT5 and differentiation stimulator	12132.3	18969.5	NaN	8567.49	NaN	NaN	NaN	NaN	26602.8	21694	13826.6	29943.2	NaN	45054.6	16194.3	NaN
P61201;P61201-2	COPS2	COP9 signalosome complex subunit 2;Isoform of P61201, Isoform 2 of COP9 signalosome complex subunit 2	26590	21402.4	11153.8	25768.7	32357.6	26219.9	23858.3	23379.3	26159.3	27582.3	23033.8	25121.8	25305.4	5630.23	26710	28745
Q9UNS2	COPS3	COP9 signalosome complex subunit 3	25968.9	48261.1	28193.2	34709.3	43527.8	40043.1	43657.9	16861.1	32188.5	17474.8	21839.7	38820.8	45089	44237.4	29442.1	26473.7
Q9BT78	COPS4	COP9 signalosome complex subunit 4	54622	50516.1	44682.7	41237	42621.6	41361.8	43607.3	46612.7	46063.4	43823.7	41939.6	43102.3	40477	32039.6	47660.5	40309
Q92905	COPS5	COP9 signalosome complex subunit 5	48558.5	45938.5	47446.5	38115.4	52670.9	46391.2	42564.7	46246.2	43950.9	40397.6	35494.8	35186.8	40462.6	33752.8	45637.7	45129.6
E7EM64;Q7L5N1	COPS6	Isoform of Q7L5N1, COP9 signalosome complex subunit 6;COP9 signalosome complex subunit 6	11741.5	10904.5	11736.6	55603.5	11162	9919.45	10970.1	11160	12777.9	11418.4	12335.7	6907.3	10171.3	10673.9	7614.56	8573.75
Q9UBW8	COPS7A	COP9 signalosome complex subunit 7a	21462.2	20217	52119.3	16659.4	35070.2	44164.8	16814.2	16368.5	22794.8	44915.7	22932.2	25697.4	22216.1	60424.6	17626.2	39430.1
E9PGT6;Q99627;Q99627-2	COPS8	Isoform of Q99627, COP9 signalosome complex subunit 8;COP9 signalosome complex subunit 8;Isoform of Q99627, Isoform 2 of COP9 signalosome complex subunit 8	115721	113352	102361	95962.9	105812	97736.9	84772.5	64730.1	98099.6	80670.1	73364.3	81423.6	92235.4	107570	77247.9	75665.2
F8VUC5;F8VVA7;F8VXB1;F8VYZ4;F8W156;F8W651;P61923;P61923-5	COPZ1	Isoform of P61923, Coatomer subunit zeta-1;Isoform of P61923, Coatomer subunit zeta-1;Isoform of P61923, Coatomer subunit zeta-1 (Fragment);Isoform of P61923, Coatomer subunit zeta-1;Isoform of P61923, Coatomer subunit zeta-1;Isoform of P61923, Coatomer subunit zeta-1;Coatomer subunit zeta-1;Isoform of P61923, Isoform 5 of Coatomer subunit zeta-1	NaN	NaN	8205.89	NaN	10206.2	NaN	32488.4	13962.6	28753.9	25758	10708.5	9016.44	15865.3	25599.3	19628.3	19658.4
Q9P299	COPZ2	Coatomer subunit zeta-2	3754	NaN	NaN	NaN	NaN	5722.81	4656.24	NaN	5438.75	2942.31	1474.15	NaN	5417.3	6053.44	4093.91	NaN
Q96MF6;Q96MF6-2;Q96MF6-3	COQ10A	Coenzyme Q-binding protein COQ10 homolog A, mitochondrial;Isoform of Q96MF6, Isoform 2 of Coenzyme Q-binding protein COQ10 homolog A, mitochondrial;Isoform of Q96MF6, Isoform 3 of Coenzyme Q-binding protein COQ10 homolog A, mitochondrial	114914	80221.4	96127.9	73300.3	49257.2	108775	85927.9	94343.1	109329	80885.6	100171	73002	68923.3	56078.1	78546.2	88469.2
Q9NZJ6	COQ3	Ubiquinone biosynthesis O-methyltransferase, mitochondrial	139324	110137	106200	98833.9	106178	174528	64307.2	110075	142370	78977.5	104897	73930.4	93434.9	86734.4	107347	110171
Q5HYK3	COQ5	2-methoxy-6-polyprenyl-1,4-benzoquinol methylase, mitochondrial	62682.6	56587.4	57524.8	45833.4	40903.3	54611.1	42794.4	59380.1	71709.2	53939.7	64183.3	78066.3	38453.5	40773.3	48606.7	46181.4
Q9Y2Z9;Q9Y2Z9-3	COQ6	Ubiquinone biosynthesis monooxygenase COQ6, mitochondrial;Isoform of Q9Y2Z9, Isoform 3 of Ubiquinone biosynthesis monooxygenase COQ6, mitochondrial	19108.9	12252.1	18299.2	12734.3	10419.3	15520.9	8934.05	17186.7	18458.5	18023.8	13088.2	19052.4	17167.3	12715.2	14426.9	15693.4
H3BP28;Q99807	COQ7	Isoform of Q99807, 5-demethoxyubiquinone hydroxylase, mitochondrial;5-demethoxyubiquinone hydroxylase, mitochondrial	39137.9	28846.9	38262.2	31612.9	28845.3	28943.3	32759.1	40959.9	38773.1	41776.4	47159.8	43991.8	36456.3	34898.5	43683.1	46138.7
Q8NI60	COQ8A	Atypical kinase COQ8A, mitochondrial	1.0668e+06	829328	971691	640239	775613	992034	605543	821712	765805	637288	682776	736718	485372	722425	638907	464596
O75208	COQ9	Ubiquinone biosynthesis protein COQ9, mitochondrial	575630	634575	680702	624751	562355	660298	512473	566683	599781	597158	538211	571783	478962	537622	572431	605297
P31146	CORO1A	Coronin-1A	24176.5	17891.9	12331.9	25952.6	13123.3	19373.4	17739.1	11282.2	26304.9	10407.2	22271.5	15286.1	16939	25349.8	27144.7	24930.2
Q9BR76	CORO1B	Coronin-1B	NaN	NaN	NaN	NaN	NaN	NaN	NaN	NaN	NaN	4084.84	NaN	NaN	NaN	10839.2	14252.4	8989
Q9ULV4;Q9ULV4-2;Q9ULV4-3	CORO1C	Coronin-1C;Isoform of Q9ULV4, Isoform 2 of Coronin-1C;Isoform of Q9ULV4, Isoform 3 of Coronin-1C	8745.37	11644.4	5491.13	6204.01	10405.7	11166.1	8787.26	6806.45	12050.8	8972.18	8932.96	9437.18	15479.2	13340.4	13954	12136.2
J3KSS5	CORO6	Isoform of Q6QEF8, Coronin	36432.7	37620	41106.5	33194.4	45817.3	35675.9	35402.2	32672.3	29702.6	31895.7	17826.4	20643.9	34248.8	24219.4	26629.7	32190.8
Q6QEF8-5	CORO6	Isoform of Q6QEF8, Isoform 5 of Coronin-6	61578.8	65325.4	58875.2	29038.9	83666.3	80914.2	66397.1	64591.8	61647.1	63330.4	56264.4	43527.8	69615	65957.6	72863.5	84793.2
A0A0A6YYL4;I3L0X9;I3L1U7;I3L3T0;P57737-3;Q9Y3D7	CORO7-PAM16;PAM16;PAM16;PAM16;CORO7;PAM16	Isoform of Q9Y3D7, Coronin;Isoform of Q9Y3D7, Mitochondrial import inner membrane translocase subunit TIM16;Isoform of Q9Y3D7, Mitochondrial import inner membrane translocase subunit TIM16;Isoform of Q9Y3D7, HCG15164, isoform CRA_b;Isoform of P57737, Isoform 3 of Coronin-7;Mitochondrial import inner membrane translocase subunit TIM16	15147.1	11333.1	NaN	NaN	NaN	NaN	NaN	7577.27	13585.5	9188.56	7653.08	24425.5	6242.2	10290.2	11972.4	9379.13
C9J8T6;Q14061	COX17	Isoform of Q14061, Cytochrome c oxidase copper chaperone;Cytochrome c oxidase copper chaperone	295735	389692	316123	397175	265628	364428	199052	821852	453126	303930	405088	488411	356825	680202	315062	323968
Q49B96	COX19	Cytochrome c oxidase assembly protein COX19	27159.5	52924.1	4652.99	49011.9	3196.87	61989.1	44457.4	7082.61	37017.6	43283.7	33691.5	42893.7	37100.8	45802	22524.4	36176.4
Q5RI15;Q5RI15-2	COX20	Cytochrome c oxidase protein 20 homolog;Isoform of Q5RI15, Isoform 2 of Cytochrome c oxidase protein 20 homolog	28689.9	25412.7	14402.1	NaN	11588	NaN	16398.9	14491.2	18478.3	15054.5	16841	12064.7	9591.79	NaN	22876.9	7437.35
P13073	COX4I1	Cytochrome c oxidase subunit 4 isoform 1, mitochondrial	1.65812e+06	1.52701e+06	1.35527e+06	1.24391e+06	1.08698e+06	1.72808e+06	1302663	1734427	2.75624e+06	1743789	1.96451e+06	1.96493e+06	1.52333e+06	1.51226e+06	2.16997e+06	2773070
P20674	COX5A	Cytochrome c oxidase subunit 5A, mitochondrial	4.33008e+06	4.1882e+06	4.90307e+06	3.95492e+06	3.91455e+06	6023194	3419617	4.36882e+06	7.80495e+06	6.16879e+06	4865046	6685104	7241973	11096913	6.21267e+06	7.605e+06
P10606	COX5B	Cytochrome c oxidase subunit 5B, mitochondrial	7956997	7347669	6412181	6322236	5706900	7657614	6.07445e+06	7810624	10626832	10832073	7.86385e+06	10399270	9974785	10117598	8698867	11592763
Q02221	COX6A2	Cytochrome c oxidase subunit 6A2, mitochondrial	209596	259381	243524	160910	188932	224496	213035	228723	307745	293179	143286	296445	166832	125254	199517	194868
P14854	COX6B1	Cytochrome c oxidase subunit 6B1	6037916	5.82715e+06	6398924	5438214	4.82818e+06	6943543	4.55985e+06	5848235	9141935	7.8717e+06	5.50229e+06	9257370	7.71228e+06	9987008	6043728	7.95663e+06
P09669	COX6C	Cytochrome c oxidase subunit 6C	368150	289127	498716	403316	336867	624113	508368	413345	449676	856372	222207	811580	681891	140181	367649	1.23534e+06
P24310	COX7A1	Cytochrome c oxidase subunit 7A1, mitochondrial	1.88145e+06	1.4147e+06	1.1391e+06	507863	842317	613033	478529	827641	1.2766e+06	948346	816247	1.53548e+06	484639	554948	781626	626653
D6RGV5;D6RIE3;H0UI06;P14406	COX7A2	Isoform of P14406, Cytochrome c oxidase subunit 7A2, mitochondrial (Fragment);Isoform of P14406, Cytochrome c oxidase subunit 7A2, mitochondrial;Isoform of P14406, Cytochrome c oxidase subunit 7A2, mitochondrial;Cytochrome c oxidase subunit 7A2, mitochondrial	223696	329225	235068	104175	136697	305347	276041	179453	349339	208354	202188	224909	129794	129673	177122	181528
E5RJZ1;H0YBD2;O14548	COX7A2L	Isoform of O14548, Cytochrome c oxidase subunit 7A-related protein, mitochondrial;Isoform of O14548, Cytochrome c oxidase subunit 7A-related protein, mitochondrial (Fragment);Cytochrome c oxidase subunit 7A-related protein, mitochondrial	24847.9	15726.4	26745.7	NaN	NaN	28813.1	10522.6	NaN	23597.1	NaN	19606.9	21296.4	27407.9	15067.5	19829.1	14682
D6R9Z7;P15954	COX7C	Isoform of P15954, Cytochrome c oxidase subunit 7C, mitochondrial;Cytochrome c oxidase subunit 7C, mitochondrial	840278	678720	443905	598009	334583	705215	628379	383932	1.29023e+06	1018997	1.31664e+06	636076	827161	803186	1.00373e+06	1.01691e+06
P10176;U3KQK5	COX8A;	Cytochrome c oxidase subunit 8A, mitochondrial;Uncharacterized protein	565903	97436.4	304323	284936	68223.3	341446	64671.3	42984.5	548993	686746	937704	238119	372717	91490.6	381629	140993
P00450	CP	Ceruloplasmin	131609	119080	95684	155801	101922	96139.8	92207.4	60000	96528.6	76673.9	72997.2	111059	83913.1	99462.8	125651	83246
P15088	CPA3	Mast cell carboxypeptidase A	53268.1	38659	58982.6	42719.2	48912.8	70901.5	55383.8	53419.4	35972.5	27102.5	51473.9	47974.2	36392.2	59130	65180.3	44879.9
Q8NE35;Q8NE35-2	CPEB3	Cytoplasmic polyadenylation element-binding protein 3;Isoform of Q8NE35, Isoform 2 of Cytoplasmic polyadenylation element-binding protein 3	8706.88	8865.27	58552	4779.88	13073.4	10253	9988.61	8985.86	11287.5	11438.9	7591.2	13061.7	12997	20561.9	7325.25	8937.53
B0QZ18;F2Z2V0;Q99829	CPNE1	Isoform of Q99829, Copine-1;Isoform of Q99829, Copine-1 (Fragment);Copine-1	12494	3208.41	10297.1	6917.03	7977.19	13274.2	4849.9	16202.5	13399.3	2581.96	9668.18	12050.8	8545.65	11474.1	10784.5	9119.68
O75131	CPNE3	Copine-3	16243.2	19824.5	18732.7	17650.4	20382.9	20151.9	23134.5	21775.8	26384	21914.9	22639.6	18841.9	23547.9	22013	22253.7	28763.7
P36551	CPOX	Oxygen-dependent coproporphyrinogen-III oxidase, mitochondrial	10137.5	NaN	8505.38	4801.98	16071.1	14544	9711.13	9054.89	13284.4	12191.6	11424	9063.17	13080.4	15983.3	14279.8	7782.6
Q9BRF8	CPPED1	Serine/threonine-protein phosphatase CPPED1	47728.3	69669.6	34270.8	29396.5	46307.5	45537.5	39368.2	36984.3	51094.8	45876.9	20221.5	21910.4	41279	51168.9	32866.6	37430.5
F8WJN3;Q16630;Q16630-2;Q16630-3	CPSF6	Isoform of Q16630, Cleavage and polyadenylation-specificity factor subunit 6;Cleavage and polyadenylation specificity factor subunit 6;Isoform of Q16630, Isoform 2 of Cleavage and polyadenylation specificity factor subunit 6;Isoform of Q16630, Isoform 3 of Cleavage and polyadenylation specificity factor subunit 6	5631.19	921.533	NaN	NaN	NaN	NaN	NaN	1359.5	1191.49	1526.18	2894.94	NaN	1519.86	2212.19	3636.82	NaN
Q92523	CPT1B	Carnitine O-palmitoyltransferase 1, muscle isoform	104441	81681	60284.4	34813	22373.4	93079	72821.9	93698.6	139977	93672	126222	87023.5	68693.7	74641	103507	110699
P23786	CPT2	Carnitine O-palmitoyltransferase 2, mitochondrial	26203.5	33793.3	33821.2	17408.9	17511.7	33338	27203.9	35029.9	25850.9	30504.9	30332.4	26164.2	18448.1	20892.6	32438	30971.8
Q9H3G5	CPVL	Probable serine carboxypeptidase CPVL	15077.7	NaN	NaN	NaN	2157.93	2919.37	NaN	NaN	15728.4	7142.73	NaN	2193.99	4714.42	NaN	7511.16	NaN
P78560	CRADD	Death domain-containing protein CRADD	8864.66	NaN	9942.33	8596.69	7411.82	7848.12	8200.5	NaN	6527.09	21826.4	11157.2	8237.45	44063.8	6397.96	10365.9	6340.44
P43155;P43155-2	CRAT	Carnitine O-acetyltransferase;Isoform of P43155, Isoform 2 of Carnitine O-acetyltransferase	211175	165569	200291	145283	132089	282689	157820	229482	288751	244826	225572	323971	210146	175941	287760	278368
A0A1W2PPJ5;J3QT87;Q96SW2;Q96SW2-2	CRBN	Isoform of Q96SW2, Protein cereblon;Isoform of Q96SW2, Protein cereblon (Fragment);Protein cereblon;Isoform of Q96SW2, Isoform 2 of Protein cereblon	NaN	NaN	NaN	NaN	NaN	54393.9	NaN	NaN	50861.6	NaN	NaN	NaN	NaN	40519.3	NaN	35769.2
P16220;P16220-2;P16220-3	CREB1	Cyclic AMP-responsive element-binding protein 1;Isoform of P16220, Isoform CREB-B of Cyclic AMP-responsive element-binding protein 1;Isoform of P16220, Isoform 3 of Cyclic AMP-responsive element-binding protein 1	8914.61	NaN	11479.3	11138.2	14284.4	NaN	NaN	NaN	NaN	11233.8	NaN	NaN	11086.2	13852.5	NaN	NaN
F8WBY3;Q96HD1;Q96HD1-2	CRELD1	Isoform of Q96HD1, Cysteine-rich with EGF-like domain protein 1;Cysteine-rich with EGF-like domain protein 1;Isoform of Q96HD1, Isoform 2 of Cysteine-rich with EGF-like domain protein 1	NaN	NaN	18778.2	NaN	NaN	NaN	NaN	NaN	12337.1	15054	13906.6	NaN	15278.6	18662.3	10698	NaN
P52943;P52943-2	CRIP2	Cysteine-rich protein 2;Isoform of P52943, Isoform 2 of Cysteine-rich protein 2	32697.5	23540.8	29877.2	18857	28541.2	27962	23226.5	25933.8	33953.9	25098.6	26988	32214.6	26219	40571.9	30946	20401.8
P46108	CRK	Adapter molecule crk	37590.9	NaN	NaN	86400.8	88294.2	67587.2	71484.5	65816.5	86858.7	33921.6	60667.9	21957.1	52230.4	93456.1	34678.3	65428.5
P46109	CRKL	Crk-like protein	51267.6	52665.6	48964	71223.8	49818.6	44577.6	42655.4	44927.2	47817.1	60191.1	42612.7	41462.7	62562.8	48193.4	54611.6	45600
Q5TZA2	CROCC	Rootletin	60467.8	154142	188173	34081.7	464940	163488	156265	126134	116356	146037	118647	206764	204028	224908	172875	146567
E9PR44;P02511	CRYAB	Isoform of P02511, Alpha-crystallin B chain (Fragment);Alpha-crystallin B chain	3395979	4.08615e+06	3.81092e+06	4628275	4733995	5.2568e+06	4.32806e+06	4837751	4078744	5.35541e+06	5207980	4583813	4917292	6.45104e+06	7.41299e+06	4.72259e+06
A0A0J9YWL0	CRYBG1	Isoform of Q9Y4K1, Beta/gamma crystallin domain-containing protein 1	5546026	12202670	22308924	10426734	23289188	27670454	20261888	21163798	12476138	4.72122e+06	9377940	25646428	34370148	75654.7	33741004	39132216
Q14894	CRYM	Ketimine reductase mu-crystallin	NaN	NaN	NaN	NaN	64565.3	NaN	170419	NaN	NaN	NaN	NaN	NaN	NaN	NaN	83685.9	8062.85
Q08257	CRYZ	Quinone oxidoreductase	27678.5	22913.7	36524.3	26220.7	31293.2	18990	26416.4	26190.3	49124.4	42861.9	40228.3	48452.4	43223	11285.7	35704.5	49071.8
B4DJV2;O75390	CS	Isoform of O75390, Citrate synthase;Citrate synthase, mitochondrial	2.75549e+06	2.33454e+06	3.07257e+06	2.17819e+06	1.62335e+06	2.70526e+06	1.65099e+06	2351289	3.44346e+06	3.04206e+06	2.18842e+06	3.69535e+06	2.44573e+06	2.0497e+06	2.83314e+06	3.49375e+06
O75534;O75534-4	CSDE1	Cold shock domain-containing protein E1;Isoform of O75534, Isoform 4 of Cold shock domain-containing protein E1	26309.9	20026.1	22880.6	22189.4	29595.4	28359.8	21258.8	22586.5	23947.8	25141.1	20187.7	25230.7	12869.6	73180.7	20357.8	29321.2
P55060;P55060-3	CSE1L	Exportin-2;Isoform of P55060, Isoform 3 of Exportin-2	31313	24608.6	26356.5	27313.3	33045.7	28232.1	29125.3	26656.3	27948.2	28863.5	22955.5	22000.2	30626	24158.9	33423.5	30312
E7EU96;P68400;Q8NEV1	CSNK2A1;CSNK2A1;CSNK2A3	Isoform of P68400, Casein kinase II subunit alpha;Casein kinase II subunit alpha;Casein kinase II subunit alpha 3	11547.5	10661.3	12253.8	11056.5	12557.6	12551.3	10136.3	10915.8	16041	21430.3	11212.3	13675.1	14913.2	9646.81	13057.5	20579.5
A0A0G2JM12;N0E472;P67870;Q5SRQ3;Q5SRQ6	CSNK2B;CSNK2B-LY6G5B--991;CSNK2B;CSNK2B;CSNK2B	Isoform of P67870, Casein kinase II subunit beta;Isoform of P67870, Casein kinase II subunit beta;Casein kinase II subunit beta;Isoform of P67870, Casein kinase II subunit beta;Isoform of P67870, Casein kinase II subunit beta	20553.5	20113.3	12879.9	NaN	NaN	17133	16337.3	14043.2	18272.4	6948.94	16301.1	NaN	12682	NaN	21822.7	12644.1
Q6UVK1	CSPG4	Chondroitin sulfate proteoglycan 4	1.31447e+06	560.955	1.45322e+06	11507	629654	NaN	981803	3572.09	5085.85	NaN	4130.05	528538	629122	5303.78	1620.17	8315.54
E9PP21;P21291	CSRP1	Isoform of P21291, Cysteine and glycine-rich protein 1;Cysteine and glycine-rich protein 1	40719	60072.9	50805.6	4995.64	47038.6	37879.6	63026	28464.7	46034.5	43752.1	35038.2	82769.3	38225.7	33166.2	43977.5	7960.67
P50461	CSRP3	Cysteine and glycine-rich protein 3	989816	1986766	1.58088e+06	1.26405e+06	1.72743e+06	1.54358e+06	1.6874e+06	1.85128e+06	747791	1.94391e+06	1.50335e+06	1.2705e+06	1.68817e+06	1.42572e+06	1.40741e+06	1.18243e+06
P01034	CST3	Cystatin-C	15232.4	16743.5	21014.8	11603.3	19803.1	21944.2	13667.6	11628.4	15913.6	20443.7	13476.8	17662.7	40245.1	19841.2	15893.6	22952.2
P04080	CSTB	Cystatin-B	431012	272081	313818	303218	216577	338728	216360	274606	389042	193322	328163	309043	203876	335849	251092	177436
A0A0A0MT56;E7EWR4;E9PID8;P33240;P33240-2	CSTF2	Isoform of P33240, Cleavage stimulation factor subunit 2 (Fragment);Isoform of P33240, Cleavage stimulation factor subunit 2;Isoform of P33240, Cleavage stimulation factor subunit 2;Cleavage stimulation factor subunit 2;Isoform of P33240, Isoform 2 of Cleavage stimulation factor subunit 2	NaN	NaN	13339.4	NaN	NaN	NaN	NaN	NaN	9234.68	NaN	NaN	NaN	9981.97	NaN	NaN	7389.01
G3V599;O15320;O15320-10;O15320-2;O15320-3;O15320-4;O15320-7;O15320-8;Q96PC5	CTAGE5;CTAGE5;CTAGE5;CTAGE5;CTAGE5;CTAGE5;CTAGE5;CTAGE5;MIA2	Isoform of O15320, Endoplasmic reticulum export factor CTAGE5;Endoplasmic reticulum export factor CTAGE5;Isoform of O15320, Isoform 11 of Endoplasmic reticulum export factor CTAGE5;Isoform of O15320, Isoform MEA11 of Endoplasmic reticulum export factor CTAGE5;Isoform of O15320, Isoform 5A of Endoplasmic reticulum export factor CTAGE5;Isoform of O15320, Isoform 5B of Endoplasmic reticulum export f…	4429.45	7143.8	NaN	NaN	63048.7	9472.39	17425.2	NaN	12817.3	19974.3	4998.98	4380.8	22053.7	3736.23	6088.43	5277.8
Q13363	CTBP1	C-terminal-binding protein 1	55285.5	20584.8	11912.4	13899.9	19784.5	12703.8	8859.45	30254.7	37879.3	19213.6	27505.1	20585.4	15147	23281.5	27308	22275.2
P35221	CTNNA1	Catenin alpha-1	10428	8126.66	20705	50920.4	12511	8903.71	6675.41	8070.09	12177.6	10209.3	8998.33	9685.16	10596.9	9712.45	8580.41	9520.93
P26232;P26232-2;P26232-5	CTNNA2	Catenin alpha-2;Isoform of P26232, Isoform 2 of Catenin alpha-2;Isoform of P26232, Isoform 5 of Catenin alpha-2	NaN	NaN	3870.29	NaN	4173.56	NaN	NaN	2763.91	4342.65	4184.09	NaN	4578.52	4943.22	3519.51	3464.22	4769.67
B4DGU4;P35222	CTNNB1	Isoform of P35222, Catenin beta-1;Catenin beta-1	8059.55	2345.05	4631.43	5083.13	3924.12	8828.85	4745.38	4967.36	7514.13	6480.26	4986.58	3218.06	6934.55	6554.6	5402.88	7998.08
Q9NSA3	CTNNBIP1	Beta-catenin-interacting protein 1	41991.4	18125.1	22520.7	16687.2	20453.8	16768.5	15698.6	23926.9	23834.9	13300.6	23646.8	17691.6	21152.2	28353.5	24079.2	25516
C9JZR2;O60716;O60716-10;O60716-11;O60716-13;O60716-17;O60716-18;O60716-19;O60716-2;O60716-21;O60716-3;O60716-5;O60716-9	CTNND1	Isoform of O60716, Catenin delta-1;Catenin delta-1;Isoform of O60716, Isoform 2AB of Catenin delta-1;Isoform of O60716, Isoform 2AC of Catenin delta-1;Isoform of O60716, Isoform 2A of Catenin delta-1;Isoform of O60716, Isoform 3ABC of Catenin delta-1;Isoform of O60716, Isoform 3AB of Catenin delta-1;Isoform of O60716, Isoform 3AC of Catenin delta-1;Isoform of O60716, Isoform 1AB of Catenin delta-…	NaN	137627	14366.3	8435.9	1146.89	31196.9	5676.93	5931.89	8873.29	8045.58	26015.7	6460.45	6426.34	8170.92	5583.75	3771.16
P07858	CTSB	Cathepsin B	35503	74455.9	23490.5	19195.6	74225.1	34109.8	45814.3	27416.5	66905.4	36255.6	46284.2	6833.57	61195.9	52315.4	55590	64224.8
A0A1B0GV23;A0A1B0GVD5;A0A1B0GW44;A0A1B0GWE8;P07339	CTSD	Isoform of P07339, Cathepsin D;Isoform of P07339, Cathepsin D;Isoform of P07339, Cathepsin D;Isoform of P07339, Cathepsin D;Cathepsin D	112560	90814.1	112013	63519.4	88171.1	98294.5	80303.7	76309.5	99334.3	81027.7	81891	82441.5	87197.2	140011	90320.2	56402.5
P08311	CTSG	Cathepsin G	16488.9	9954.48	14889.8	14892	15307.7	13332.1	8397.14	10488.9	16863.5	9138.73	9052.51	9743.04	18522.2	13504.6	20454.5	12803.7
Q9UBR2	CTSZ	Cathepsin Z	9831.78	9987.88	9350.01	8382.36	7119.94	NaN	NaN	NaN	NaN	9038.35	NaN	10400.3	11668.3	NaN	8665.14	NaN
Q14247	CTTN	Src substrate cortactin	39375.3	25840	27271.8	20645.9	44137.6	25761.8	30048.6	39743.3	31250.1	23730.2	34426.9	28617.6	56772.7	56486.9	43615.4	28038.5
Q9H467	CUEDC2	CUE domain-containing protein 2	7636.23	7013.34	NaN	7000.63	NaN	NaN	9132.23	7497.28	12789.9	11984.9	7434.73	10409.4	9524.86	10234.1	5802.35	7694.42
A0A0C4DGX4;Q13616	CUL1	Isoform of Q13616, Cullin-1;Cullin-1	37302.4	NaN	676491	1.25166e+06	402026	414916	862932	11600.8	509411	183948	385259	374164	464727	486370	304295	198822
A0A0A0MTN0;Q13617;Q13617-2	CUL2	Isoform of Q13617, Cullin-2;Cullin-2;Isoform of Q13617, Isoform 2 of Cullin-2	9893.69	7635.21	10252.3	10352.7	11052	10834.8	11188	8502.66	9627.79	10758.6	8273.7	14311.7	11017.3	6932.14	12583.2	9438.19
Q13618;Q13618-2	CUL3	Cullin-3;Isoform of Q13618, Isoform 2 of Cullin-3	7777.8	4930.63	10017	6961.39	8860.01	13075.7	9345.77	9528.65	9883.9	8650.44	8278.01	10989.1	10741.2	12783.8	11663.1	11782.8
Q13619	CUL4A	Cullin-4A	8754.04	4579.31	6997.11	7464.41	19677.1	7375.85	6535.38	10871.5	9921.22	8798.9	8738.17	3227.78	7104.01	9902.52	12244.2	7345.74
Q93034	CUL5	Cullin-5	10349.1	9896.16	10974.1	9537.13	9832.2	6996.16	10410.8	10717.2	10263.2	12032.9	12007.6	9397.44	11494.5	6852.12	8491.84	16258.2
O60888;O60888-2;O60888-3	CUTA	Protein CutA;Isoform of O60888, Isoform A of Protein CutA;Isoform of O60888, Isoform C of Protein CutA	226649	278813	224251	173016	323459	209686	216177	168684	188410	227802	158683	185488	213848	296591	199493	158134
Q9NTM9	CUTC	Copper homeostasis protein cutC homolog	76105.7	65645.4	62294.1	58672.1	64889	60042	46842.6	54136.5	53537.4	50163.8	47103.9	44732.7	40821.2	86272.2	40885.8	42807.3
P00167;P00167-2	CYB5A	Cytochrome b5;Isoform of P00167, Isoform 2 of Cytochrome b5	20899.3	24239.1	27879.2	29240.9	31042	27359.5	23894.7	23813	30096.5	21135.4	18995.1	36569.8	30392	28901.6	26668	23959.3
J3KNF8	CYB5B	Isoform of O43169, Cytochrome b5 type B	139334	134938	130057	124769	112575	149865	113227	136415	153595	138374	124117	108331	108194	163782	144185	106487
Q9UHQ9	CYB5R1	NADH-cytochrome b5 reductase 1	486969	393444	708002	381882	564647	797356	528287	579980	544848	420662	505534	583772	610014	568985	578611	652518
P00387;P00387-2;P00387-3	CYB5R3	NADH-cytochrome b5 reductase 3;Isoform of P00387, Isoform 2 of NADH-cytochrome b5 reductase 3;Isoform of P00387, Isoform 3 of NADH-cytochrome b5 reductase 3	107908	86478.9	127374	99885.2	116281	108563	87394.9	75438	97705.3	102251	90798.1	117296	114351	93481.6	98586.3	107353
P04839	CYBB	Cytochrome b-245 heavy chain	NaN	NaN	2771.86	NaN	2553.45	NaN	NaN	NaN	2403.84	1421.39	1809.24	NaN	3269.17	2600.94	2774.34	NaN
Q53TN4;Q53TN4-3	CYBRD1	Cytochrome b reductase 1;Isoform of Q53TN4, Isoform 3 of Cytochrome b reductase 1	11282.1	6882.59	14360.1	7441.31	8514.57	10554.6	6151.49	2713.68	9314.69	7713.35	7973.82	7690.08	9248.97	11061.6	10811	7774.83
P08574	CYC1	Cytochrome c1, heme protein, mitochondrial	458006	371642	311253	323105	238122	345386	351475	461557	572784	475727	524650	472646	366313	364402	458767	585085
C9JFR7;P99999	CYCS	Isoform of P99999, Cytochrome c (Fragment);Cytochrome c	1.04375e+06	868876	1.14384e+06	976439	932014	1.26569e+06	816780	1.06295e+06	1.54662e+06	1428199	1.08961e+06	1.43453e+06	1.13163e+06	936024	949723	1482677
Q7L576	CYFIP1	Cytoplasmic FMR1-interacting protein 1	NaN	NaN	1393.41	1604.83	3953.19	1966.07	NaN	1342.72	3626.2	2339.53	2355.9	4038.29	3458.65	3303.19	5890.81	NaN
Q15438;Q15438-2	CYTH1	Cytohesin-1;Isoform of Q15438, Isoform 2 of Cytohesin-1	16037.7	15227.4	161580	17659.5	23634.8	10642.4	17032.5	12451.9	9573.86	158145	14127	22054.9	17610	18644.2	NaN	15428.6
Q8N465	D2HGDH	D-2-hydroxyglutarate dehydrogenase, mitochondrial	NaN	NaN	10973.5	9418.82	9811.92	28153.7	22399.8	NaN	NaN	NaN	NaN	4278.73	NaN	36051.8	NaN	NaN
P98082;P98082-2;P98082-3	DAB2	Disabled homolog 2;Isoform of P98082, Isoform 2 of Disabled homolog 2;Isoform of P98082, Isoform 3 of Disabled homolog 2	NaN	NaN	NaN	NaN	NaN	NaN	NaN	NaN	NaN	NaN	NaN	NaN	NaN	1704.1	NaN	NaN
A0A0B4J239;F5GXX5;F5H895;P61803	DAD1	Isoform of P61803, Dolichyl-diphosphooligosaccharide--protein glycosyltransferase subunit DAD1;Isoform of P61803, Dolichyl-diphosphooligosaccharide--protein glycosyltransferase subunit DAD1;Isoform of P61803, Dolichyl-diphosphooligosaccharide--protein glycosyltransferase subunit DAD1;Dolichyl-diphosphooligosaccharide--protein glycosyltransferase subunit DAD1	NaN	15792	27179.7	21409.7	43589.4	36483.9	29151.9	21164.7	27073.8	21747.5	30319.9	28216.9	10540.3	25113.1	26132.4	30603.5
Q14118	DAG1	Dystroglycan	87424.8	119764	127725	95927.3	122580	134127	90401.2	73747	89796	96861.2	55650.8	115273	113156	209905	114404	85743.5
P51398;P51398-2;P51398-3	DAP3	28S ribosomal protein S29, mitochondrial;Isoform of P51398, Isoform 2 of 28S ribosomal protein S29, mitochondrial;Isoform of P51398, Isoform 3 of 28S ribosomal protein S29, mitochondrial	8626.6	NaN	2991.35	NaN	NaN	NaN	NaN	12019.1	12569.1	3752.34	9867.21	3911.91	8892.06	7674.19	12470.8	10960
P14868	DARS	Aspartate--tRNA ligase, cytoplasmic	34722.4	18912.2	16856.8	15561.1	17363	14730.8	24649.7	25195.3	22914	18103.6	20852.4	20725.5	22790.2	23063.9	19673.6	29248.6
Q6PI48	DARS2	Aspartate--tRNA ligase, mitochondrial	11047.6	97214.7	9091.85	10126.6	9228.37	16742.2	6424.69	11172.6	18133	11703.2	8054.58	15695.1	12982.2	10447.1	8943.28	16373.7
P07108	DBI	Acyl-CoA-binding protein	2.32049e+06	2.18898e+06	2.82217e+06	2351459	2341172	2.79975e+06	1.79622e+06	1.67506e+06	2.39024e+06	1.69805e+06	871095	2868955	1.89087e+06	2.58501e+06	1.12677e+06	1.64773e+06
Q16643;Q16643-3	DBN1	Drebrin;Isoform of Q16643, Isoform 3 of Drebrin	NaN	14591.7	14812.9	6571.56	13525.6	6815.87	15682.4	24898.6	17621.6	12886.9	9972.56	14411.7	14843.4	32769.2	16895.2	12521.4
B4DDD6	DBNL	Isoform of Q9UJU6, Drebrin-like protein	1835.95	NaN	NaN	3015.77	4019.35	3758.2	3160.84	2405.95	3017.11	3225.6	1772.25	3877.37	3532.04	9857.49	5312.29	2426.58
Q9UJU6	DBNL	Drebrin-like protein	33968.1	19623.5	21688	19687.6	27991.5	21328.9	21531.8	14644.9	20235.3	20150.8	13576.7	19651	20581.3	32542.1	19081.3	17419.9
P11182	DBT	Lipoamide acyltransferase component of branched-chain alpha-keto acid dehydrogenase complex, mitochondrial	23610.2	17927.2	36552	28777.6	27283.9	29529.5	20844.4	26523.4	23219	31001.9	30396.1	31864.3	26613.9	26970.5	27696.7	28912.4
H0YKR8;H0YLH4;H0YM86;H0YMN6;H0YN92;H0YNS2;Q8TEB1;Q8TEB1-2	DCAF11	Isoform of Q8TEB1, DDB1- and CUL4-associated factor 11 (Fragment);Isoform of Q8TEB1, DDB1- and CUL4-associated factor 11 (Fragment);Isoform of Q8TEB1, DDB1- and CUL4-associated factor 11 (Fragment);Isoform of Q8TEB1, DDB1- and CUL4-associated factor 11 (Fragment);Isoform of Q8TEB1, DDB1- and CUL4-associated factor 11 (Fragment);Isoform of Q8TEB1, DDB1- and CUL4-associated factor 11 (Fragment);DDB…	NaN	NaN	13938.8	NaN	NaN	NaN	NaN	NaN	NaN	17581.7	NaN	14179.2	16410.8	NaN	NaN	NaN
Q58WW2-3;Q58WW2-4	DCAF6	Isoform of Q58WW2, Isoform 3 of DDB1- and CUL4-associated factor 6;Isoform of Q58WW2, Isoform 4 of DDB1- and CUL4-associated factor 6	57892.2	57824.1	46603.4	42082.5	63321.4	54334.4	34401	51015.5	53760.4	50895.6	37618.1	45256.9	38271.7	47745.9	44087.8	56855.8
O15075;O15075-2;Q5VZY9	DCLK1	Serine/threonine-protein kinase DCLK1;Isoform of O15075, Isoform 1 of Serine/threonine-protein kinase DCLK1;Isoform of O15075, Serine/threonine-protein kinase DCLK1	NaN	NaN	3178.58	NaN	NaN	NaN	NaN	2069.45	3048.87	NaN	2815.89	NaN	NaN	11415	10947.2	5054.39
P07585	DCN	Decorin	686903	566548	674302	565150	778306	551535	483839	693919	663826	455350	553044	645718	465313	866089	787033	539807
Q96C86	DCPS	m7GpppX diphosphatase	3582.62	NaN	4734.06	3954.53	5651.1	4674.72	4164.5	6535.53	6058.6	2869.06	4968.86	5803.22	5254.36	4294.1	8822.26	5270.87
E7EX90;Q14203-3;Q14203-4;Q14203-5	DCTN1	Isoform of Q14203, Dynactin subunit 1;Isoform of Q14203, Isoform 3 of Dynactin subunit 1;Isoform of Q14203, Isoform 4 of Dynactin subunit 1;Isoform of Q14203, Isoform 5 of Dynactin subunit 1	18501.7	7827.29	10310.5	19962.7	8462.24	10012.4	8807.71	7278.71	12273.2	12430.9	11380.6	10782.5	15147.7	9821.39	10983.6	12494.3
Q13561;Q13561-2;Q13561-3	DCTN2	Dynactin subunit 2;Isoform of Q13561, Isoform 2 of Dynactin subunit 2;Isoform of Q13561, Isoform 3 of Dynactin subunit 2	59099.8	67125.8	92538.3	80527.1	110099	94161.7	71013.4	55151.7	77895.6	81756.9	59937.3	78542.3	96823	98482.6	71159.1	66992.2
O75935;O75935-3	DCTN3	Dynactin subunit 3;Isoform of O75935, Isoform 3 of Dynactin subunit 3	14227.6	19434.1	7516.87	10567.8	15850.9	7243.4	7842.71	11528.5	13631.4	4387.42	15718.7	16712.5	13268.5	11730.7	12345.3	16324.1
Q9UJW0	DCTN4	Dynactin subunit 4	NaN	NaN	18108.8	26156.3	9238.28	NaN	5815.39	NaN	NaN	18532.5	NaN	13445.3	14474.2	NaN	5685.56	7407.91
E5RK00;O00399	DCTN6	Isoform of O00399, Dynactin subunit 6;Dynactin subunit 6	NaN	17877.4	33937.3	191693	41830.9	21130	35434.1	18152.7	18636.9	43403.8	18236.3	33298.7	276831	12907.3	11893.5	19949.9
Q9H773	DCTPP1	dCTP pyrophosphatase 1	48877.1	63553.4	61948.7	45359.1	41681.3	48861.3	38876.5	44883.3	63017	64192.7	41604.3	63637.3	50191.7	79878.8	56590	66530
Q96GG9	DCUN1D1	DCN1-like protein 1	10232.2	7117.59	12252.2	11070.1	14769	12348.2	13320.3	10455.2	13888.5	10698.8	9392.4	12246	17766.3	8176.61	11413.7	9964.6
J3KS22;J3QS36;Q7Z4W1	DCXR	Isoform of Q7Z4W1, L-xylulose reductase (Fragment);Isoform of Q7Z4W1, L-xylulose reductase (Fragment);L-xylulose reductase	25669.1	92346.5	81233.6	29575.7	32653.1	62385.6	30674.3	63134.2	32500.3	90120.4	33366.2	59868.4	47297.5	24794.3	41334	53705.4
O94760	DDAH1	N(G),N(G)-dimethylarginine dimethylaminohydrolase 1	289739	227045	125343	208088	311030	411286	457582	213247	238027	205249	113731	178098	343846	337014	329538	268414
O95865	DDAH2	N(G),N(G)-dimethylarginine dimethylaminohydrolase 2	29230.8	28365.8	23132.5	23888.7	21174.9	33239.2	27072	19427.6	30458.7	28927.5	22031	24605.7	29849.3	34641.3	31898.7	23345.5
Q16531	DDB1	DNA damage-binding protein 1	22048.8	22945.1	21518.2	19379.6	20973.5	21833.3	17559.5	21849.7	23911.7	21317.8	23112.9	22864.7	24210.1	19831.6	25322.6	24856.1
Q5TDH0;Q5TDH0-3	DDI2	Protein DDI1 homolog 2;Isoform of Q5TDH0, Isoform 3 of Protein DDI1 homolog 2	22145.1	11061.4	15038.8	17367	15597.9	11026.7	4587.46	4614.44	4296.35	6860.39	5055.69	10456.9	10671.2	9381.11	12869.7	5713.63
A0A0C4DGS1;P39656;P39656-2	DDOST	Isoform of P39656, Dolichyl-diphosphooligosaccharide--protein glycosyltransferase 48 kDa subunit;Dolichyl-diphosphooligosaccharide--protein glycosyltransferase 48 kDa subunit;Isoform of P39656, Isoform 2 of Dolichyl-diphosphooligosaccharide--protein glycosyltransferase 48 kDa subunit	19934.2	17508.7	34546.4	15866.1	18264.9	18684.5	21622.1	22779.2	18251.1	19061.3	24087.1	32159.1	17872.4	29410.1	25777.8	24872.1
Q96HY6	DDRGK1	DDRGK domain-containing protein 1	15318.9	15464.5	39936.5	21887.4	29592.2	32062.7	19269.5	17858.6	25377.6	27316.6	18074.1	31660.7	32459.5	38859.8	22247.2	27210.9
J3KQ18;P30046	DDT	Isoform of P30046, D-dopachrome decarboxylase;D-dopachrome decarboxylase	291729	165740	290108	66585	189315	198020	406900	403364	386126	145136	383684	54518.2	258830	335040	426027	404063
Q92499	DDX1	ATP-dependent RNA helicase DDX1	14935.9	21183.8	20535.4	17439.5	26696.7	19981.3	28774.9	22049.4	26034.4	21743	28581.5	22312.4	31941	14457.7	30255.9	27823.2
A0A1W2PQ51;A0A1X7SBZ2;Q92841;Q92841-1;Q92841-2;Q92841-3	DDX17	Isoform of Q92841, Probable ATP-dependent RNA helicase DDX17;Isoform of Q92841, Probable ATP-dependent RNA helicase DDX17;Probable ATP-dependent RNA helicase DDX17;Isoform of Q92841, Isoform 2 of Probable ATP-dependent RNA helicase DDX17;Isoform of Q92841, Isoform 3 of Probable ATP-dependent RNA helicase DDX17;Isoform of Q92841, Isoform 4 of Probable ATP-dependent RNA helicase DDX17	17219.1	8182.17	30726.4	21417.7	26759.1	22794.8	15955.6	15472.9	18596.8	20646.7	16955.8	20670	21724.9	17106.9	16155.9	15809
I3L0H8;Q9NUU7	DDX19A	Isoform of Q9NUU7, ATP-dependent RNA helicase DDX19A;ATP-dependent RNA helicase DDX19A	42807.9	36241.1	52547.7	45068.9	59212.5	51889	38634.7	48102.9	42783.2	43949.7	32033.2	48990.2	43241	31768.2	37575.9	50348.4
O00148	DDX39A	ATP-dependent RNA helicase DDX39A	222878	224577	301725	325937	297373	NaN	248291	NaN	219487	276718	232869	307631	299626	NaN	257657	304501
Q13838;Q13838-2	DDX39B	Spliceosome RNA helicase DDX39B;Isoform of Q13838, Isoform 2 of Spliceosome RNA helicase DDX39B	25006.1	30437.3	16948.4	21996	16233.5	31413.4	18740.5	23066.1	25461.2	22295.5	27650.1	25434.7	34666.1	29219.1	37285.3	29576.1
A0A0D9SF53;A0A0D9SFB3;A0A0D9SG12;O00571;O00571-2	DDX3X	Isoform of O00571, ATP-dependent RNA helicase DDX3X;Isoform of O00571, ATP-dependent RNA helicase DDX3X;Isoform of O00571, ATP-dependent RNA helicase DDX3X;ATP-dependent RNA helicase DDX3X;Isoform of O00571, Isoform 2 of ATP-dependent RNA helicase DDX3X	35143.9	43108.9	13481.1	13612.5	12656	5843.4	28815.1	19501.2	21635.2	15154	31007.7	9016.26	20226.7	21217.8	22716.7	12136.3
A0A0C4DG89;Q7L014	DDX46	Isoform of Q7L014, Probable ATP-dependent RNA helicase DDX46;Probable ATP-dependent RNA helicase DDX46	6309.54	NaN	NaN	9142.45	NaN	NaN	NaN	4448.41	7139.22	5616.91	7394.77	NaN	8158.07	4533.56	6752.88	9193.41
J3KTA4;P17844;P17844-2	DDX5	Isoform of P17844, Probable ATP-dependent RNA helicase DDX5;Probable ATP-dependent RNA helicase DDX5;Isoform of P17844, Isoform 2 of Probable ATP-dependent RNA helicase DDX5	24846.9	26370.1	35326.2	25390.7	25532.1	28215.2	19230.6	14234.7	17070.3	17034.2	16708.5	22077.6	25027.3	18417.8	21923.7	12962.1
P26196	DDX6	Probable ATP-dependent RNA helicase DDX6	9387.15	10257.2	NaN	NaN	16205.7	NaN	13414.9	14266.7	15680.8	19913.8	14351.6	9176.7	33141.4	9992.77	9456.62	10975.6
Q16698;Q16698-2	DECR1	2,4-dienoyl-CoA reductase, mitochondrial;Isoform of Q16698, Isoform 2 of 2,4-dienoyl-CoA reductase, mitochondrial	1.3242e+06	1.21378e+06	1.59143e+06	1.18649e+06	870945	1.55812e+06	834485	1.16711e+06	2.05731e+06	1.43844e+06	1.03519e+06	1494093	1.23165e+06	1.44271e+06	1.11064e+06	1.46324e+06
P35659	DEK	Protein DEK	20376.5	95225.3	17009	14056.2	222519	13192.1	160261	14884.3	151856	19450.6	88849.5	116880	252143	71781.7	84180.1	132469
O43583	DENR	Density-regulated protein	133781	144115	100016	92920	125387	128082	118260	97082.1	124217	101170	81651.4	91748	120862	121879	95770.1	105016
Q8TB45	DEPTOR	DEP domain-containing mTOR-interacting protein	15957.4	21289.6	10279.5	12554	19877.7	7743.12	11425.2	9294.55	6463.85	3330.3	5051.56	5406.94	6414.28	1456.11	21239.2	6792.62
E9PPM8;G3V158;Q9Y315	DERA	Isoform of Q9Y315, Deoxyribose-phosphate aldolase;Isoform of Q9Y315, 2-deoxyribose-5-phosphate aldolase homolog (C. elegans), isoform CRA_a;Deoxyribose-phosphate aldolase	NaN	NaN	5753.6	NaN	NaN	NaN	NaN	NaN	NaN	5927.38	NaN	NaN	6631.68	NaN	NaN	NaN
P17661	DES	Desmin	5206182	5475687	5233337	6192488	11161888	5.54708e+06	5.9196e+06	4.61559e+06	5459845	5.24641e+06	5.88071e+06	5.18039e+06	10515475	8620696	6735361	5678171
O00273	DFFA	DNA fragmentation factor subunit alpha	NaN	NaN	16356.6	8861.03	2386.46	5216.65	NaN	2316.82	3777.3	4113.61	15098.1	9221.27	3032.64	12962.9	3177.04	3932.21
A0A0A0MR74;O75907	DGAT1	Isoform of O75907, Diacylglycerol O-acyltransferase 1;Diacylglycerol O-acyltransferase 1	76080.8	131497	74165.8	96888.1	69440.1	69745.3	97807.5	97791.7	79077	66799.3	57530.7	55754.1	95112.3	53408.1	105384	64455.9
E9PNL8;Q13574;Q13574-2;Q13574-3;Q13574-4;Q13574-5;Q13574-6;Q13574-7	DGKZ	Isoform of Q13574, Diacylglycerol kinase;Diacylglycerol kinase zeta;Isoform of Q13574, Isoform 2 of Diacylglycerol kinase zeta;Isoform of Q13574, Isoform 3 of Diacylglycerol kinase zeta;Isoform of Q13574, Isoform 4 of Diacylglycerol kinase zeta;Isoform of Q13574, Isoform 5 of Diacylglycerol kinase zeta;Isoform of Q13574, Isoform 6 of Diacylglycerol kinase zeta;Isoform of Q13574, Isoform 7 of Diac…	NaN	NaN	NaN	NaN	NaN	NaN	NaN	NaN	NaN	NaN	NaN	NaN	NaN	959.929	1915	1621.02
Q7Z3D6-2	DGLUCY	Isoform of Q7Z3D6, Isoform 2 of D-glutamate cyclase, mitochondrial	77944.5	78653.5	268823	23168.7	63783.7	79342.6	123987	154814	101659	89318	158833	7522.14	81412.9	56081.4	172455	158554
I3NI32;Q02127	DHODH	Isoform of Q02127, Dihydroorotate dehydrogenase (quinone), mitochondrial;Dihydroorotate dehydrogenase (quinone), mitochondrial	NaN	NaN	54689.7	47844.7	45353.4	19195.7	17569.1	17088.2	14685.2	32999.7	19622.2	25711.7	28535.3	12353.6	14080.6	18915.8
A0A087WZK0;M0R0V2;P49366;P49366-3	DHPS	Isoform of P49366, Deoxyhypusine synthase;Isoform of P49366, Deoxyhypusine synthase (Fragment);Deoxyhypusine synthase;Isoform of P49366, Isoform 3 of Deoxyhypusine synthase	NaN	NaN	NaN	NaN	NaN	NaN	NaN	18733.1	NaN	7837.62	5327.49	NaN	7601.07	NaN	NaN	NaN
Q6UWP2;Q6UWP2-3	DHRS11	Dehydrogenase/reductase SDR family member 11;Isoform of Q6UWP2, Isoform 3 of Dehydrogenase/reductase SDR family member 11	45488.1	NaN	10946.4	NaN	NaN	12904.2	10610.1	110404	7959.33	10372.3	8950.12	7857.29	NaN	8809.89	7678.3	12490.5
Q9BTZ2;Q9BTZ2-4;Q9BTZ2-8	DHRS4	Dehydrogenase/reductase SDR family member 4;Isoform of Q9BTZ2, Isoform 4 of Dehydrogenase/reductase SDR family member 4;Isoform of Q9BTZ2, Isoform 8 of Dehydrogenase/reductase SDR family member 4	5874.16	5174.17	10784.1	4998.22	7941.04	10035.1	4363.28	8353.53	8338.61	7864.87	6219.3	20234.6	13586.9	8603.24	4966.09	11297.1
Q9Y394;Q9Y394-2	DHRS7	Dehydrogenase/reductase SDR family member 7;Isoform of Q9Y394, Isoform 2 of Dehydrogenase/reductase SDR family member 7	14219.6	18378.8	68491.6	14244	19232.6	17757.3	16017.8	16307.4	18243.2	17179	11809.3	19145.6	20283.1	30131.7	19999.8	21363.7
A0A0C4DGQ8;Q6IAN0	DHRS7B	Isoform of Q6IAN0, Dehydrogenase/reductase SDR family member 7B;Dehydrogenase/reductase SDR family member 7B	10596.5	12200.6	26780.9	19178.1	20677.5	20082.5	15882.5	14246.3	9406.97	12041.4	17167.3	17532.2	10871.7	13400.3	8704.4	14831.6
A6NNS2;A6NNS2-2	DHRS7C	Dehydrogenase/reductase SDR family member 7C;Isoform of A6NNS2, Isoform 2 of Dehydrogenase/reductase SDR family member 7C	10447.5	38582.2	76634.6	69986	52049.2	64231.7	68632.3	34680.7	56711.9	44222.7	56619.1	48136.1	35973.1	7183.74	35164.3	36666.1
Q96HY7	DHTKD1	Probable 2-oxoglutarate dehydrogenase E1 component DHKTD1, mitochondrial	13209.6	NaN	17074.6	8142.6	NaN	22502.3	16841.6	9175.35	15062.9	10177.3	16311.7	NaN	10119.8	13260.7	16990	12140.7
Q08211	DHX9	ATP-dependent RNA helicase A	25346.8	25648.9	57181.7	24928.1	25488.2	26844.6	28466.5	26489.2	30089.9	31323	24974.1	26756.6	33427	28808.4	30453.8	29915.5
Q9NR28;Q9NR28-2	DIABLO	Diablo homolog, mitochondrial;Isoform of Q9NR28, Isoform 2 of Diablo homolog, mitochondrial	30952.3	28719.1	50454.1	29194	28681	33581.4	26939.3	51660.5	41087.6	39835	31402	42623.5	33320.9	28731.1	32897.3	33070.6
A0A0G2JH68;A0A140T8Z0;O60610;O60610-2;O60610-3	DIAPH1	Isoform of O60610, Protein diaphanous homolog 1;Isoform of O60610, Protein diaphanous homolog 1;Protein diaphanous homolog 1;Isoform of O60610, Isoform 2 of Protein diaphanous homolog 1;Isoform of O60610, Isoform 3 of Protein diaphanous homolog 1	7249.98	16064.5	NaN	6245.35	11695.1	10768.2	16492.5	12017.8	14120.3	13335.4	13495.3	12140.9	13249.7	19472	23281.5	11038.7
Q9P265	DIP2B	Disco-interacting protein 2 homolog B	19220.1	33012.4	40866.4	13668.3	28627.2	40302.7	20079.7	23834.4	17683.6	21508.7	18483.3	27827.1	22352.2	39937.9	15690.4	27449.5
A0A0U1RQW6;Q9Y2E4	DIP2C	Isoform of Q9Y2E4, Disco-interacting protein 2 homolog C;Disco-interacting protein 2 homolog C	NaN	NaN	14477.7	NaN	NaN	NaN	13199.7	NaN	NaN	13316.1	NaN	12914.4	14065.2	2767.56	NaN	8279.58
Q8ND98;Q96MX6;Q96MX6-2	DKFZp434B156;WDR92;WDR92	Isoform of Q96MX6, Uncharacterized protein DKFZp434B156;WD repeat-containing protein 92;Isoform of Q96MX6, Isoform 2 of WD repeat-containing protein 92	NaN	58049.1	112897	185138	59670.6	89398.6	52425.6	NaN	56267.5	122409	NaN	24205.9	58304.4	45195.1	NaN	70589
Q68DG0	DKFZp779D0968	Isoform of Q9UBY9, Heat shock protein beta-7	23201.7	32695.7	38216.1	19804.6	34454.3	38275.7	28144.4	17943.3	25797.7	21245.5	23699.4	23139.7	32137.4	31088.6	24864.4	20278.2
P10515	DLAT	Dihydrolipoyllysine-residue acetyltransferase component of pyruvate dehydrogenase complex, mitochondrial	303061	307633	389968	261187	276543	284401	286637	329118	486078	516067	413233	372351	344979	263332	289619	406526
P09622	DLD	Dihydrolipoyl dehydrogenase, mitochondrial	650477	734323	860122	623147	772418	1.1015e+06	621814	790599	734819	608037	679660	704795	868958	992535	828751	1.11979e+06
P36957	DLST	Dihydrolipoyllysine-residue succinyltransferase component of 2-oxoglutarate dehydrogenase complex, mitochondrial	708220	592017	526302	471626	516041	839569	822729	1.01398e+06	1.10738e+06	733579	969973	678636	914995	973570	769010	1556351
Q96GE9;Q96GE9-2	DMAC1	Distal membrane-arm assembly complex protein 1;Isoform of Q96GE9, Isoform 2 of Distal membrane-arm assembly complex protein 1	56109.6	14720.8	31851	26045.7	9607.57	38975.3	42440.4	38088.3	73725.6	27850.1	59294.2	35336.2	19986.2	21891.4	15122	44249.2
P11532;P11532-4	DMD	Dystrophin;Isoform of P11532, Isoform 3 of Dystrophin	151194	157755	146091	156011	171887	138987	182147	136649	109617	148378	143627	114524	148005	88891.4	175063	109717
Q08495;Q08495-2	DMTN	Dematin;Isoform of Q08495, Isoform 2 of Dematin	50214.2	43657	36754.1	48391.2	33831.3	35537.1	30490.5	39633.6	47994.2	39442.5	36648.1	38284.9	43290.7	48518.8	41026	44968.1
A0A0J9YY17;A0A1C7CYW8;H0YGZ2;Q8IVF4	DNAH10	Isoform of Q8IVF4, Dynein heavy chain 10, axonemal (Fragment);Isoform of Q8IVF4, Dynein heavy chain 10, axonemal;Isoform of Q8IVF4, Dynein heavy chain 10, axonemal (Fragment);Dynein heavy chain 10, axonemal	NaN	NaN	2949.41	NaN	4629.36	3478.36	NaN	NaN	NaN	NaN	NaN	NaN	NaN	3465.47	NaN	NaN
O60884	DNAJA2	DnaJ homolog subfamily A member 2	63753	61055.5	70488.1	72891.6	96905.2	68040.5	66897.2	69493.3	65043.2	67683.4	65227.7	72465.1	73796.9	67883.8	58306.4	65064.7
Q96EY1	DNAJA3	DnaJ homolog subfamily A member 3, mitochondrial	50679	34477.5	63099.8	4622.3	3592.42	27194.1	4386.38	33324.2	56912.8	63484.3	43339.8	36064.1	84142.5	35702.2	35581.4	39387.4
Q8WW22;Q8WW22-2	DNAJA4	DnaJ homolog subfamily A member 4;Isoform of Q8WW22, Isoform 2 of DnaJ homolog subfamily A member 4	30251	21066.6	30655	11232.4	26229.9	31241.3	18609.4	22043.1	24899.1	25449.9	21131.7	15516.6	23566.4	14526.7	16164.9	18700.4
P25685	DNAJB1	DnaJ homolog subfamily B member 1	16337	NaN	33979.9	10109.1	10485.4	46006	10764.5	45283.3	31216.2	8862.68	22226.6	9781.13	15925	6605.09	49478.4	7759.05
J3KPS0;Q9NXW2;Q9NXW2-2	DNAJB12	Isoform of Q9NXW2, DnaJ (Hsp40) homolog, subfamily B, member 12, isoform CRA_c;DnaJ homolog subfamily B member 12;Isoform of Q9NXW2, Isoform 2 of DnaJ homolog subfamily B member 12	NaN	NaN	NaN	2088.51	NaN	NaN	NaN	NaN	NaN	NaN	NaN	2239.67	2075.93	NaN	2595.61	NaN
P25686	DNAJB2	DnaJ homolog subfamily B member 2	12787.8	17948.1	21789.6	16574.3	17625.4	12553.6	20995.5	13795.9	14575.6	14623.4	12157.9	18092	15923.6	24304.3	14371.3	13937.1
Q9UDY4	DNAJB4	DnaJ homolog subfamily B member 4	34273.8	56143.9	62170.6	54374.7	68260.3	53615.1	51992.7	51809.2	31893.4	53971.3	50862.6	50568.8	56628.3	48540.4	53464.2	46008.3
A0A0J9YX62;O75190-3	DNAJB6	Isoform of O75190, DnaJ homolog subfamily B member 6;Isoform of O75190, Isoform C of DnaJ homolog subfamily B member 6	17933.4	13893.6	12756.6	12044.6	10735.2	15199.9	6613.24	9755.91	17891.7	8259.98	26506.2	10335.7	18153.5	37833.7	26863.8	14310.9
Q96DA6;Q96DA6-2	DNAJC19	Mitochondrial import inner membrane translocase subunit TIM14;Isoform of Q96DA6, Isoform 2 of Mitochondrial import inner membrane translocase subunit TIM14	32090.2	28491.3	20667.7	20358	19438.2	24616	14638.7	24611.3	32970.2	24787.5	26496.2	30740.7	24913.9	25444.9	27906.2	24605.1
Q9H3Z4;Q9H3Z4-2	DNAJC5	DnaJ homolog subfamily C member 5;Isoform of Q9H3Z4, Isoform 2 of DnaJ homolog subfamily C member 5	NaN	11796.5	8453.67	NaN	9198.6	8212.44	6833.52	NaN	6887.18	5963.06	NaN	7973.96	7925.06	17008.3	10933.1	7955.19
Q99615	DNAJC7	DnaJ homolog subfamily C member 7	1.68752e+06	NaN	943817	NaN	2540480	NaN	7225.87	9911.17	NaN	2608.69	454696	9042.72	3253.5	33105.1	27932.9	335077
O00429;O00429-2	DNM1L	Dynamin-1-like protein;Isoform of O00429, Isoform 4 of Dynamin-1-like protein	12421.4	12751	8369.87	7302.46	7959.93	16688.2	10822.2	13416.2	13787.1	14908.9	21593.4	16133.7	15907	11927.4	17628.4	19247.9
P50570;P50570-2;P50570-3;P50570-4;P50570-5	DNM2	Dynamin-2;Isoform of P50570, Isoform 2 of Dynamin-2;Isoform of P50570, Isoform 3 of Dynamin-2;Isoform of P50570, Isoform 4 of Dynamin-2;Isoform of P50570, Isoform 5 of Dynamin-2	14841.6	14274.1	12284.9	15539.2	13705.6	16150.9	11630.8	13098.2	16316.6	14739.5	13026.4	15235.1	16722.5	14476.5	16081.8	16340.2
Q6XZF7	DNMBP	Dynamin-binding protein	261622	233869	24835.2	26303.5	30127.6	217651	43984.6	25483.1	26043.7	39123.1	29968.9	165642	31804.7	188609	176562	25723.3
E7ETB3;Q9ULA0	DNPEP	Isoform of Q9ULA0, Aspartyl aminopeptidase;Aspartyl aminopeptidase	67153.1	70941.2	76602.4	59969	64039.2	55477.7	54492.4	61966.2	68586.3	53678.7	55696.3	67630.6	62134.9	45915.1	51248.7	56130
H0Y8X4;O43598	DNPH1	Isoform of O43598, 2'-deoxynucleoside 5'-phosphate N-hydrolase 1 (Fragment);2'-deoxynucleoside 5'-phosphate N-hydrolase 1	159692	112243	166222	120666	157176	106227	85596.8	74261.5	149003	117661	85343	160227	157059	118853	120983	85163.2
Q5QJE6	DNTTIP2	Deoxynucleotidyltransferase terminal-interacting protein 2	134513	223451	69166.8	169436	96020.1	238271	306446	282856	143776	251064	420959	231423	132930	452887	566209	369746
Q9BU89	DOHH	Deoxyhypusine hydroxylase	7311.82	10764.8	14233.6	8862.99	14433.4	21885.6	11879.3	7616.18	11107.8	10822.9	10001.7	10458.4	16743.9	24488.5	17028.9	12952.3
I3L1H5;Q9BZG8	DPH1	Isoform of Q9BZG8, 2-(3-amino-3-carboxypropyl)histidine synthase subunit 1 (Fragment);2-(3-amino-3-carboxypropyl)histidine synthase subunit 1	NaN	NaN	NaN	NaN	NaN	NaN	NaN	1905.19	NaN	3318.57	NaN	11738.7	3419.24	NaN	4111.16	2184.59
Q96FX2;Q96FX2-2	DPH3	DPH3 homolog;Isoform of Q96FX2, Isoform 2 of DPH3 homolog	66161.1	NaN	NaN	84658.7	79250.6	85544.7	53890.9	55634.4	73806	45162.9	47155.5	76961.2	56848.3	78313.6	39833.1	58048.6
G3V180;G3V1D3;Q9NY33;Q9NY33-4	DPP3	Isoform of Q9NY33, Dipeptidyl peptidase 3;Isoform of Q9NY33, Dipeptidyl peptidase 3;Dipeptidyl peptidase 3;Isoform of Q9NY33, Isoform 4 of Dipeptidyl peptidase 3	52596.2	65031.6	60940.9	121753	187348	74000.7	50831.7	43375.4	43283.2	85712.5	35484.2	55218.4	56532.7	62641	45943.1	42651.3
M0R2A8;Q86TI2;Q86TI2-2;Q86TI2-4	DPP9	Isoform of Q86TI2, Dipeptidyl peptidase 9;Dipeptidyl peptidase 9;Isoform of Q86TI2, Isoform 2 of Dipeptidyl peptidase 9;Isoform of Q86TI2, Isoform 3 of Dipeptidyl peptidase 9	10950.5	15399.3	19871.5	24923.3	29376.2	NaN	NaN	10556.5	11780.3	26111.4	20439.4	10452.2	22432.4	15059.3	8819.81	NaN
Q07507	DPT	Dermatopontin	217735	91499.6	110913	104958	137342	160013	92140.8	115452	218556	67477.7	244546	83745.1	106141	142664	266835	120955
Q9C005	DPY30	Protein dpy-30 homolog	2406.03	NaN	6295.53	2263.8	5561.48	NaN	3402.66	NaN	2759.21	NaN	10865.9	5902.49	6428.06	9717.89	18072.5	NaN
A0A1C7CYX9;Q16555	DPYSL2	Isoform of Q16555, Dihydropyrimidinase-related protein 2;Dihydropyrimidinase-related protein 2	86957.2	86456.1	95975.8	64705.4	88260.5	87579.1	59678.3	62812	84899.6	79401.6	65876	70979.7	59566	63427	60752.6	59125.4
Q14195-2	DPYSL3	Isoform of Q14195, Isoform LCRMP-4 of Dihydropyrimidinase-related protein 3	166628	177007	229894	103311	146742	204762	157772	193691	173167	117075	214712	133944	169365	227331	191635	193531
O14531;Q5T0Q6	DPYSL4	Dihydropyrimidinase-related protein 4;Isoform of O14531, Dihydropyrimidinase-related protein 4	NaN	NaN	331978	146646	211657	NaN	NaN	NaN	NaN	NaN	NaN	165402	NaN	NaN	NaN	NaN
C9JCC6;E9PQX9;Q14919;Q14919-2	DRAP1	Isoform of Q14919, Dr1-associated corepressor;Isoform of Q14919, Dr1-associated corepressor;Dr1-associated corepressor;Isoform of Q14919, Isoform 2 of Dr1-associated corepressor	22627.3	13144.8	25938.4	NaN	24313.3	22655	16718.5	9697.76	11265.3	10016	9525.88	19773.2	13285.7	22710.7	12649.8	11240.2
A8MZF9;P55039	DRG2	Isoform of P55039, Developmentally-regulated GTP-binding protein 2;Developmentally-regulated GTP-binding protein 2	NaN	8088.65	14457.4	15876.4	13748.2	13484.7	12701.5	14449.5	15646.2	10014.1	12432.1	17368.4	23909	5966.9	5793.72	19260.7
Q03001-3	DST	Isoform of Q03001, Isoform 3 of Dystonin	NaN	43120.2	61483	48180.6	47867.8	313842	41984.9	NaN	NaN	49535.9	17016.5	128541	80640	158125	38211.6	156633
P60981	DSTN	Destrin	40016.4	31630.4	25476.4	27176.7	37286.5	30714.7	40658.3	26922	20017.7	31068.5	37281.3	33377.1	33197.7	29941.2	35253.1	31983.5
Q8TEA8	DTD1	D-aminoacyl-tRNA deacylase 1	29791.9	36538	38635.2	37379.8	18359.4	28696.9	38865.8	14655.1	16603.1	37252.3	13749.6	15332.3	19492.4	30346.8	18727.1	14360
K7ERH7;M0R021	DTNA	Isoform of Q9Y4J8, Dystrobrevin alpha (Fragment);Isoform of Q9Y4J8, Dystrobrevin alpha	11923.2	22295.8	23416.2	NaN	NaN	NaN	NaN	9412.32	NaN	33914.2	13147.4	28632.7	NaN	13270.4	19499.1	NaN
Q9Y4J8	DTNA	Dystrobrevin alpha	117412	103081	109074	104395	120437	113289	118506	107294	99393.8	92592.1	98228.7	100125	109737	92332.3	118928	98590.8
P23919;P23919-2	DTYMK	Thymidylate kinase;Isoform of P23919, Isoform 2 of Thymidylate kinase	NaN	NaN	6321.77	5906.34	4108.78	NaN	NaN	NaN	NaN	NaN	NaN	6125.37	NaN	NaN	6402.23	NaN
Q68J44	DUPD1	Dual specificity phosphatase DUPD1	33463.5	34462.5	21363.1	39626.5	35377.4	56583.9	25879.1	41149.6	28976.9	38174.4	37834	32201.1	51163.8	32822.4	39148.9	21594.8
Q9BVJ7	DUSP23	Dual specificity protein phosphatase 23	NaN	NaN	NaN	15141.4	3737.65	NaN	NaN	3157.95	13093.2	14426.7	7464.37	NaN	14414.4	NaN	3746.32	NaN
Q5VZP5	DUSP27	Inactive dual specificity phosphatase 27	21856.1	3003.12	9766.07	6204.11	13870.2	6097.27	5047.5	7747.58	9912.92	10390.4	8279.54	3560.06	11357.9	13345.3	3975.72	6476.53
P51452	DUSP3	Dual specificity protein phosphatase 3	173437	162051	93657.3	375363	83842.1	82492.7	94212.8	82599.7	103003	102842	137619	111286	114005	115011	96052	106726
H0YKI0;P33316	DUT	Isoform of P33316, Deoxyuridine 5'-triphosphate nucleotidohydrolase, mitochondrial;Deoxyuridine 5'-triphosphate nucleotidohydrolase, mitochondrial	32280.4	29564.5	NaN	21870.2	36570.8	NaN	NaN	22761.8	33282.9	22085.2	13888.8	19804.9	22484.3	33059.3	30744.9	16269.9
Q14204	DYNC1H1	Cytoplasmic dynein 1 heavy chain 1	15618.9	17365.8	10135.5	10069.1	10005.4	10636.7	10616.6	9441.82	12051.6	20603.4	11460.2	13028	12205.3	9713.42	12541.1	15187
Q13409-2;Q13409-3	DYNC1I2	Isoform of Q13409, Isoform 2B of Cytoplasmic dynein 1 intermediate chain 2;Isoform of Q13409, Isoform 2C of Cytoplasmic dynein 1 intermediate chain 2	72159.6	49716.6	65157.8	61925.2	66529.5	69154.3	47433	71817.1	65443.1	62435.8	53622.9	81124.4	63969.6	73420.9	57541.4	64395
E9PHI6;Q9Y6G9	DYNC1LI1	Isoform of Q9Y6G9, Cytoplasmic dynein 1 light intermediate chain 1;Cytoplasmic dynein 1 light intermediate chain 1	28978.2	32437.1	38646.9	45195.2	52345.4	30869.7	31765.5	30929.4	31831.9	26433.1	27963.6	30541.9	30854.2	31819.2	26409.2	27228.2
O43237;O43237-2	DYNC1LI2	Cytoplasmic dynein 1 light intermediate chain 2;Isoform of O43237, Isoform 2 of Cytoplasmic dynein 1 light intermediate chain 2	24242.2	13097.1	14055.9	18525.4	14989.1	21012.9	11194.3	20175.2	13180.3	14376.6	12569.6	11842.5	19268.9	13383.3	16217.6	14408.5
P63167	DYNLL1	Dynein light chain 1, cytoplasmic	33952.9	46174	NaN	NaN	NaN	NaN	NaN	NaN	26395.4	NaN	NaN	NaN	NaN	27218.4	30319.9	NaN
Q96FJ2	DYNLL2	Dynein light chain 2, cytoplasmic	141519	96219.9	279339	152085	82442.6	64575.3	100719	66222	56984.2	101962	46920	94644.4	72590.3	72996.9	69514.8	63128.8
B1AKR6;Q9NP97	DYNLRB1	Isoform of Q9NP97, Dynein light chain roadblock-type 1;Dynein light chain roadblock-type 1	73311	71766.3	72832.4	107365	80810.9	79475.3	85406.7	70544.5	63032	59325.5	78643	66297.5	56383.1	72291.6	50620.3	72263.4
P63172;Q5VTU3	DYNLT1	Dynein light chain Tctex-type 1;Isoform of P63172, Dynein light chain Tctex-type 1	687.988	NaN	1868.38	NaN	NaN	NaN	NaN	NaN	1596.1	NaN	NaN	10588.4	NaN	1280.9	NaN	NaN
A6NGJ0;P51808	DYNLT3	Isoform of P51808, Dynein light chain Tctex-type 3;Dynein light chain Tctex-type 3	NaN	NaN	10948.1	6723.32	11424.2	8481.09	NaN	5982.02	4188.98	7490.87	4018.19	8688.3	NaN	NaN	5859.31	7942.39
O75923-10;O75923-14;O75923-8	DYSF	Isoform of O75923, Isoform 10 of Dysferlin;Isoform of O75923, Isoform 14 of Dysferlin;Isoform of O75923, Isoform 8 of Dysferlin	129222	82311.2	96913.9	93236.9	110327	92231.2	91297.7	89860.7	90434.2	73509.5	80958.8	72057.8	84811.3	83154.5	97642.2	77645.3
H3BTB7;Q5JPH6;Q5JPH6-2	EARS2	Isoform of Q5JPH6, Probable glutamate--tRNA ligase, mitochondrial;Probable glutamate--tRNA ligase, mitochondrial;Isoform of Q5JPH6, Isoform 2 of Probable glutamate--tRNA ligase, mitochondrial	4358.64	2460.74	3471.11	2828.06	3066.52	NaN	2739.81	3986.13	5344.91	3905.88	4506.09	4807.29	3087.07	NaN	4568.82	NaN
Q13011	ECH1	Delta(3,5)-Delta(2,4)-dienoyl-CoA isomerase, mitochondrial	991769	1.03625e+06	1.01041e+06	570951	495581	733506	670935	859284	1.30885e+06	1.14903e+06	880690	1.55477e+06	819504	568082	1.12996e+06	859656
Q9NTX5;Q9NTX5-2;Q9NTX5-6	ECHDC1	Ethylmalonyl-CoA decarboxylase;Isoform of Q9NTX5, Isoform 2 of Ethylmalonyl-CoA decarboxylase;Isoform of Q9NTX5, Isoform 6 of Ethylmalonyl-CoA decarboxylase	22910.8	19180.2	18210.7	15294.9	12557.2	17958.7	14507.8	20026.1	27388.9	14727.8	26442.4	39324.9	32488.3	29983	13844.4	24624.3
Q86YB7;Q86YB7-2	ECHDC2	Enoyl-CoA hydratase domain-containing protein 2, mitochondrial;Isoform of Q86YB7, Isoform 2 of Enoyl-CoA hydratase domain-containing protein 2, mitochondrial	33810.5	41904	23993.6	21256.3	16294.1	29491.4	22675.9	25613.2	23680.5	24795.8	20585.6	22689.9	21104.8	29081.9	27876.5	28316.5
Q96DC8	ECHDC3	Enoyl-CoA hydratase domain-containing protein 3, mitochondrial	34032.2	129015	60759.9	32107.5	38293.6	60264.1	41997.7	26027.8	44594.2	46208.5	62389.3	53176.3	50279.8	31093.6	36023.2	48021.3
P30084	ECHS1	Enoyl-CoA hydratase, mitochondrial	669553	701554	1.04066e+06	562279	572751	754832	546844	586998	845292	768189	834570	909459	664002	548277	598493	738347
P42126;P42126-2	ECI1	Enoyl-CoA delta isomerase 1, mitochondrial;Isoform of P42126, Isoform 2 of Enoyl-CoA delta isomerase 1, mitochondrial	1065649	1.06247e+06	1.00015e+06	686510	551769	860836	661949	1.01591e+06	1.26771e+06	1.02388e+06	865339	880848	784087	1.03767e+06	821868	814128
A0A0C4DGA2;O75521;O75521-2	ECI2	Isoform of O75521, Enoyl-CoA delta isomerase 2, mitochondrial;Enoyl-CoA delta isomerase 2, mitochondrial;Isoform of O75521, Isoform 2 of Enoyl-CoA delta isomerase 2, mitochondrial	119773	93027.6	111475	91116	82321.9	114884	97695.6	115535	152413	134292	129887	129794	128095	83396.3	130757	129772
Q16610;Q16610-2;Q16610-4	ECM1	Extracellular matrix protein 1;Isoform of Q16610, Isoform 2 of Extracellular matrix protein 1;Isoform of Q16610, Isoform 4 of Extracellular matrix protein 1	NaN	NaN	NaN	10468.9	NaN	9246.72	NaN	NaN	17764.9	8220.21	NaN	11940.7	10017.7	31129.9	14028.5	7385.1
Q5VYK3	ECM29	Proteasome-associated protein ECM29 homolog	14267.6	NaN	75889.4	10912.4	96740.2	177682	12424.3	7307.44	10219.9	6205.73	7895.6	4340.28	10750	2021.38	13275.8	9250.44
Q9BQ95	ECSIT	Evolutionarily conserved signaling intermediate in Toll pathway, mitochondrial	5879.34	NaN	948929	867612	7338.78	23896.8	847659	1.11381e+06	793280	706204	8219.36	732647	565258	NaN	475522	1.91477e+06
O60869;O60869-2;O60869-3	EDF1	Endothelial differentiation-related factor 1;Isoform of O60869, Isoform 2 of Endothelial differentiation-related factor 1;Isoform of O60869, Isoform 3 of Endothelial differentiation-related factor 1	107300	119628	127072	111844	143138	131732	93990.7	95652.8	119827	118125	75161.6	144448	147136	215793	100137	96341.8
Q15075	EEA1	Early endosome antigen 1	12863.1	10254.1	12806.3	8295.36	13858.7	11095.2	11126.7	9009.12	10085.2	11576.5	7239.53	10138.7	15109	23140.5	13652.2	12586.1
P68104	EEF1A1	Elongation factor 1-alpha 1	2365636	2.47464e+06	2.81344e+06	2.26498e+06	3351644	3243036	2560034	2.5375e+06	3.37487e+06	3.07454e+06	2.54608e+06	3.34128e+06	4.30039e+06	3122374	3.27697e+06	3827668
Q05639	EEF1A2	Elongation factor 1-alpha 2	388493	256377	432521	503053	453575	577096	224796	271166	375668	634137	227264	419270	432911	249332	263986	327581
P24534	EEF1B2	Elongation factor 1-beta	385101	429465	496690	421350	408466	449914	304796	345055	459095	362533	312572	452495	419839	651933	278859	363590
E9PRY8;P29692;P29692-2	EEF1D	Isoform of P29692, Elongation factor 1-delta;Elongation factor 1-delta;Isoform of P29692, Isoform 2 of Elongation factor 1-delta	318952	303278	348971	347758	400676	399406	278638	281582	399802	349176	299074	302757	402858	464863	327032	367369
C9J1V9;D6RBD7;O43324;O43324-2	EEF1E1-BLOC1S5;EEF1E1;EEF1E1;EEF1E1	EEF1E1-BLOC1S5 readthrough (NMD candidate);Isoform of O43324, Eukaryotic translation elongation factor 1 epsilon-1;Eukaryotic translation elongation factor 1 epsilon-1;Isoform of O43324, Isoform 2 of Eukaryotic translation elongation factor 1 epsilon-1	NaN	NaN	2121	2833.17	NaN	1939.78	2732.08	3467.98	3094.71	3041.15	4249.68	3205.31	3743.3	NaN	4313.79	5311.24
P26641	EEF1G	Elongation factor 1-gamma	137141	123094	142226	150034	190725	129401	101434	144106	145930	128002	124627	139238	175833	122195	168080	134034
P13639	EEF2	Elongation factor 2	551465	571564	681689	582015	702876	561208	571832	588753	610333	665675	574466	646262	712705	538057	530741	572671
O00418	EEF2K	Eukaryotic elongation factor 2 kinase	13670.4	12934.6	6072.61	12381.7	15816.6	13733.4	10684.9	15938	13221.8	13899.7	11518.7	8627.92	16146.9	11495.1	NaN	15425.5
C9J8T0;P57772;P57772-2	EEFSEC	Isoform of P57772, Selenocysteine-specific elongation factor;Selenocysteine-specific elongation factor;Isoform of P57772, Isoform 2 of Selenocysteine-specific elongation factor	NaN	NaN	NaN	NaN	NaN	NaN	NaN	4100.68	4238.45	NaN	2682.08	3161.76	NaN	NaN	NaN	NaN
A4FU69;A4FU69-2;A4FU69-3;A4FU69-4;A4FU69-5;A4FU69-6;H0Y843;K7EJC3	EFCAB5	EF-hand calcium-binding domain-containing protein 5;Isoform of A4FU69, Isoform 2 of EF-hand calcium-binding domain-containing protein 5;Isoform of A4FU69, Isoform 3 of EF-hand calcium-binding domain-containing protein 5;Isoform of A4FU69, Isoform 4 of EF-hand calcium-binding domain-containing protein 5;Isoform of A4FU69, Isoform 5 of EF-hand calcium-binding domain-containing protein 5;Isoform of …	40633	31135.8	39176	38694.3	33153.7	33197.3	30572.5	28106.4	37887.5	30406.4	28825.5	28857.7	28896.5	21116.8	25910.8	27378.9
Q12805;Q12805-2;Q12805-3;Q12805-4	EFEMP1	EGF-containing fibulin-like extracellular matrix protein 1;Isoform of Q12805, Isoform 2 of EGF-containing fibulin-like extracellular matrix protein 1;Isoform of Q12805, Isoform 3 of EGF-containing fibulin-like extracellular matrix protein 1;Isoform of Q12805, Isoform 4 of EGF-containing fibulin-like extracellular matrix protein 1	NaN	NaN	16125.2	102799	23600.2	NaN	9418.29	NaN	5938.57	NaN	7852.85	NaN	5985.81	NaN	NaN	4550.68
Q9BUP0	EFHD1	EF-hand domain-containing protein D1	6223.3	19228.7	9069.36	17802.5	12227.4	58420.5	17246.4	5186.49	79251.2	56247.6	26956.7	9495.15	17492	21490.1	12734.7	7160.25
Q96C19	EFHD2	EF-hand domain-containing protein D2	11653.3	7232.15	6803.3	NaN	NaN	8973.55	12839.2	NaN	14335.4	8762.5	NaN	10175.7	13613.1	16298.7	13240.8	11368.2
Q15029;Q15029-2;Q15029-3	EFTUD2	116 kDa U5 small nuclear ribonucleoprotein component;Isoform of Q15029, Isoform 2 of 116 kDa U5 small nuclear ribonucleoprotein component;Isoform of Q15029, Isoform 3 of 116 kDa U5 small nuclear ribonucleoprotein component	176538	180760	183944	167108	162459	209910	176546	198034	213537	193396	171641	180775	206433	207828	207357	280965
Q63HQ2-2	EGFLAM	Isoform of Q63HQ2, Isoform 2 of Pikachurin	12073.5	24529.7	12565	14853.2	18730	10686.1	21250.4	13280.3	12571.6	12583.3	10872.2	20840.1	13073	12044	15725	10351.7
Q9GZT9;Q9GZT9-2	EGLN1	Egl nine homolog 1;Isoform of Q9GZT9, Isoform 2 of Egl nine homolog 1	24283.4	27183.9	21970	9972.03	19419.9	38926.8	24382.1	19188.6	23086.5	15034.8	30449.4	19785.1	21497.1	17011.1	17985	25507.4
Q8N3D4	EHBP1L1	EH domain-binding protein 1-like protein 1	9613.88	14850.3	10403.6	10122.8	12575.6	11141.2	10362.2	8911.07	12475.9	10724.5	8541.93	10669.7	12561.2	11520.4	10937.2	14550.8
A0A024R571;Q9H4M9	EHD1	Isoform of Q9H4M9, EH domain-containing protein 1;EH domain-containing protein 1	47429.5	50535.5	38642.3	32013.8	37153.5	38178.2	35546.7	36536.4	44284.3	37270.1	36567.1	24535.9	44069	32692.3	37112.4	38839.5
Q9NZN4	EHD2	EH domain-containing protein 2	224387	226776	256422	195886	203161	220878	197450	215109	246690	201578	184103	210496	213408	162111	233671	213467
Q9H223	EHD4	EH domain-containing protein 4	20735	56695.8	28246.8	NaN	27410.9	17700.8	10123.5	9624.71	21971.1	26212.2	11502.5	28268.2	16723.2	16847.4	17402.7	17007
K7EM18;P41567	EIF1	Isoform of P41567, Eukaryotic translation initiation factor 1;Eukaryotic translation initiation factor 1	91608.3	80151	81269.7	71362	82648.1	70620.3	67788.2	56772.2	77483.2	92736.8	64897.8	83887.8	82364.5	79043.6	69882.6	58573
A6NJH9;O14602	EIF1AY	Isoform of O14602, Eukaryotic translation initiation factor 1A, Y-chromosomal;Eukaryotic translation initiation factor 1A, Y-chromosomal	27137.3	32388	38709.2	34262.3	35839.9	24869	13534.6	27067	31301.5	33954.8	15733.1	37152.9	23804.2	27044.4	16543.7	30141.4
F8WAE5;Q9BY44;Q9BY44-3	EIF2A	Isoform of Q9BY44, Eukaryotic translation initiation factor 2A;Eukaryotic translation initiation factor 2A;Isoform of Q9BY44, Isoform 3 of Eukaryotic translation initiation factor 2A	24541.8	32699.8	14512.5	14566.7	18318.8	19101.9	35705.5	31057.3	31499.2	29327.7	30191.6	8536.47	36055.5	47742.9	27565.5	37187.3
Q14232	EIF2B1	Translation initiation factor eIF-2B subunit alpha	1326.24	NaN	1219.04	1620.33	1580.64	9368.59	7348.28	1604.81	1252.68	2613.56	NaN	2315.58	1847.91	9082.91	3529.68	2971.86
G3V5E5;H0YJJ8;P49770	EIF2B2	Isoform of P49770, Translation initiation factor eIF-2B subunit beta;Isoform of P49770, Translation initiation factor eIF-2B subunit beta (Fragment);Translation initiation factor eIF-2B subunit beta	NaN	NaN	1748.56	1224.74	2073.48	1313.7	11952.1	2072.19	2369.46	2255.86	12065.6	2853.67	2908.53	NaN	2064.51	10707.4
Q9NR50;Q9NR50-2;Q9NR50-3	EIF2B3	Translation initiation factor eIF-2B subunit gamma;Isoform of Q9NR50, Isoform 2 of Translation initiation factor eIF-2B subunit gamma;Isoform of Q9NR50, Isoform 3 of Translation initiation factor eIF-2B subunit gamma	213008	38747.2	69824.9	73750.7	68388.1	71803.7	67227.1	59559.3	75995.1	67088.2	41663.7	35884	75618.8	81359.3	55709	86780.2
A0A087WTA5;Q9UI10-2;Q9UI10-3	EIF2B4	Isoform of Q9UI10, Translation initiation factor eIF-2B subunit delta;Isoform of Q9UI10, Isoform 2 of Translation initiation factor eIF-2B subunit delta;Isoform of Q9UI10, Isoform 3 of Translation initiation factor eIF-2B subunit delta	NaN	NaN	7844.17	10357.1	NaN	3744.92	NaN	6714.14	5678.5	6948.18	7658.79	5628	6239.3	NaN	NaN	6260.24
Q13144	EIF2B5	Translation initiation factor eIF-2B subunit epsilon	NaN	NaN	10038.3	5167.62	NaN	NaN	NaN	NaN	13400.4	13627.9	5804.78	7347.29	12146	NaN	3007.97	15226.4
P05198	EIF2S1	Eukaryotic translation initiation factor 2 subunit 1	40153.1	44255.2	35544	18771.2	39747.2	40911.5	36692.1	43692.9	51673.5	39855.7	34903	33781	46487.9	49601.1	51167.2	52622.5
P20042	EIF2S2	Eukaryotic translation initiation factor 2 subunit 2	26280.9	27141.8	30686.2	21662	38544.1	34213.2	19270.8	22213.6	32237.5	27724.3	22255.6	25198.2	27409.6	36387.4	22757.9	25741.2
P41091	EIF2S3	Eukaryotic translation initiation factor 2 subunit 3	74226.2	59612.6	36768.3	67183.8	61984.9	28326.9	28312.9	27931.4	34625.2	30888.5	30414.6	48907.1	24962.5	43993.8	20118.8	32735.4
Q14152	EIF3A	Eukaryotic translation initiation factor 3 subunit A	16831	10087.3	19575.2	16051.2	14042.3	274601	9395.37	12536.1	11862.3	21453.4	15605.6	28581.2	13310	14700.6	11806.5	11397.9
P55884;P55884-2	EIF3B	Eukaryotic translation initiation factor 3 subunit B;Isoform of P55884, Isoform 2 of Eukaryotic translation initiation factor 3 subunit B	19235.8	20332.2	26121.5	15446	25434	22286.4	13362.4	18410.3	20448.3	23022.2	17171.6	24604.1	23960.7	23699.7	27520.6	25724.4
Q99613;Q99613-2	EIF3C	Eukaryotic translation initiation factor 3 subunit C;Isoform of Q99613, Isoform 2 of Eukaryotic translation initiation factor 3 subunit C	5735.62	15418	27452.5	19540.5	7109	17449	17961	8901.36	11453.4	9775.35	6729.04	10118.3	7070.84	14851.6	13903.1	15355.6
O15371;O15371-2;O15371-3	EIF3D	Eukaryotic translation initiation factor 3 subunit D;Isoform of O15371, Isoform 2 of Eukaryotic translation initiation factor 3 subunit D;Isoform of O15371, Isoform 3 of Eukaryotic translation initiation factor 3 subunit D	15328.5	9557.51	11414.8	8354.64	11316	7674.79	84479.8	7797.23	9950.87	10210.4	8555.94	8340.79	12017.1	NaN	16239.8	11545.3
P60228	EIF3E	Eukaryotic translation initiation factor 3 subunit E	12536.7	8283.83	NaN	NaN	5800.98	2639.59	10969.5	9538.33	11821.7	9676.96	9681.24	10364.6	NaN	19686.2	14480.7	6415.56
O00303	EIF3F	Eukaryotic translation initiation factor 3 subunit F	12249.3	27128.2	26168.9	20526.5	27295.6	19939.5	14196.9	17542.3	20733.2	20051.3	19742.5	23319.4	22230	25337.8	19876.9	19571.1
O75821	EIF3G	Eukaryotic translation initiation factor 3 subunit G	23867.5	19424	24997.3	15702.8	24202.8	20821.4	23952	20613.2	52019.6	28361.2	24817.7	14701.7	24940.2	35655.7	23085.1	35795.9
A0A087WZK9;B3KS98;O15372	EIF3H;EIF3S3;EIF3H	Isoform of O15372, Eukaryotic translation initiation factor 3 subunit H;Isoform of O15372, Eukaryotic translation initiation factor 3 subunit H;Eukaryotic translation initiation factor 3 subunit H	33733.7	42649.9	23076.6	19000.6	34663.4	33408.3	32213.5	32763.3	26428.8	40798.8	23626.5	29629	23411.1	18570.3	50725.9	27030.2
Q13347	EIF3I	Eukaryotic translation initiation factor 3 subunit I	NaN	5131.16	17248.7	5534.54	7499.54	8259.82	NaN	NaN	NaN	7741.51	1755.63	10424.6	6685.82	NaN	10120.2	9983.96
O75822	EIF3J	Eukaryotic translation initiation factor 3 subunit J	98330.3	174188	87919.4	121392	110549	125018	105765	108397	109336	124669	89019.8	95084.8	135752	145943	143280	132267
K7ERF1;Q9UBQ5	EIF3K	Isoform of Q9UBQ5, Eukaryotic translation initiation factor 3 subunit K;Eukaryotic translation initiation factor 3 subunit K	54301.2	51047.8	45647.8	43628.4	37440.3	42000.9	62131.2	34420	46920	103574	41819.3	88552.5	41636.3	35513.1	53546	41252.4
B0QY89;Q9Y262;Q9Y262-2	EIF3L	Isoform of Q9Y262, Eukaryotic translation initiation factor 3 subunit L;Eukaryotic translation initiation factor 3 subunit L;Isoform of Q9Y262, Isoform 2 of Eukaryotic translation initiation factor 3 subunit L	15246.7	NaN	28801.2	23660.8	20232.5	24841.9	21173.5	24834.5	13651.6	14371.5	9699.53	9270.87	11368.6	10914	39994.1	17742.6
Q7L2H7	EIF3M	Eukaryotic translation initiation factor 3 subunit M	27180	10803	36745.8	41176.2	49076.6	55269.4	24051.9	28810.9	12781.7	16946.9	24758.5	14188.5	12775.2	8490.56	25810.4	21359.1
P60842	EIF4A1	Eukaryotic initiation factor 4A-I	11646.7	18030.2	10708.4	10707.8	10688.1	10320.4	8552.03	10181.4	15163.4	11509.3	16211.6	5328.46	9813.05	16110.1	13420	13917.6
Q14240	EIF4A2	Eukaryotic initiation factor 4A-II	88671.7	113232	121524	98416.4	132998	128374	114439	89004.3	116086	120023	71040.9	126198	143228	65534	98422.8	118211
P38919	EIF4A3	Eukaryotic initiation factor 4A-III	17450.4	35570.9	22908.5	15349.7	16410.5	15596.7	19915.1	14806	24828.2	17420.3	19061.5	16960.1	18091.1	23705.7	15003.2	19469.2
E7EX17;P23588	EIF4B	Isoform of P23588, Eukaryotic translation initiation factor 4B;Eukaryotic translation initiation factor 4B	103072	109993	157077	113765	160380	139343	91770.4	86261	126746	96702.8	83688	147086	128149	251996	111712	108483
P06730;P06730-2	EIF4E	Eukaryotic translation initiation factor 4E;Isoform of P06730, Isoform 2 of Eukaryotic translation initiation factor 4E	13870.4	14926.9	7144.09	14277.3	50825.3	11827.9	12853.7	12914	14824.4	9534.57	13700.6	17714.6	12044.2	14172	12307.5	11936.3
Q8N5X7;Q8N5X7-2	EIF4E3	Eukaryotic translation initiation factor 4E type 3;Isoform of Q8N5X7, Isoform 2 of Eukaryotic translation initiation factor 4E type 3	NaN	NaN	6476.79	3211	6204.89	NaN	NaN	NaN	NaN	4057.5	NaN	4566.5	5632.48	NaN	NaN	NaN
Q13541	EIF4EBP1	Eukaryotic translation initiation factor 4E-binding protein 1	85062.3	75325.7	103656	92187.6	89993.6	110666	79610.6	59288.2	83681.6	94795.1	72333	89358.4	70697.5	128946	59935.6	59973.7
Q13542	EIF4EBP2	Eukaryotic translation initiation factor 4E-binding protein 2	44600.9	44017.2	42430.8	21347.3	37243.4	40796	32654.4	27115.7	49625.4	39598.8	25462.4	47062	52531.2	46400.2	32338	42769.6
O60516	EIF4EBP3	Eukaryotic translation initiation factor 4E-binding protein 3	14435.5	NaN	NaN	NaN	NaN	NaN	NaN	NaN	19441.8	28773.7	8862.93	NaN	NaN	17994.5	NaN	NaN
E7EUU4;E7EX73;E9PGM1;Q04637-8	EIF4G1	Isoform of Q04637, Eukaryotic translation initiation factor 4 gamma 1;Isoform of Q04637, Eukaryotic translation initiation factor 4 gamma 1;Isoform of Q04637, Eukaryotic translation initiation factor 4 gamma 1;Isoform of Q04637, Isoform 8 of Eukaryotic translation initiation factor 4 gamma 1	28878.9	28411.1	38106.3	39331.8	43729.3	34263.7	30226.3	26837.7	30830.9	38387.2	24708.3	38234	37612	28427.6	28775.2	36910.4
P78344;P78344-2	EIF4G2	Eukaryotic translation initiation factor 4 gamma 2;Isoform of P78344, Isoform 2 of Eukaryotic translation initiation factor 4 gamma 2	14816	10470	18485.2	17116	12856.9	NaN	6114.4	9363.07	9498.91	10873.6	5307.19	10223	7356.66	NaN	7504.03	9258.84
Q15056;Q15056-2	EIF4H	Eukaryotic translation initiation factor 4H;Isoform of Q15056, Isoform Short of Eukaryotic translation initiation factor 4H	176200	193126	203410	153796	208356	188386	155393	130565	156812	143047	157216	178639	188049	286614	171284	122684
P55010	EIF5	Eukaryotic translation initiation factor 5	22057.2	27039.9	33196	32366.5	34484.1	40063.7	29629.3	41751.5	33720	35897.9	39669.8	38533.4	48717.9	51118.2	48192.9	53909.1
I3L397;I3L504;P63241;P63241-2	EIF5A	Isoform of P63241, Eukaryotic translation initiation factor 5A (Fragment);Isoform of P63241, Eukaryotic translation initiation factor 5A-1;Eukaryotic translation initiation factor 5A-1;Isoform of P63241, Isoform 2 of Eukaryotic translation initiation factor 5A-1	423190	407435	450907	535606	514684	522308	460406	477403	532960	434594	467097	518971	619550	656208	565041	632133
A0A087WUT6;O60841	EIF5B	Isoform of O60841, Eukaryotic translation initiation factor 5B;Eukaryotic translation initiation factor 5B	9041.57	NaN	5677.61	3974.98	9239.9	12182	7280.28	9443.04	11526.5	10768.4	8164.49	9845.72	10786.2	18657	9717.01	11241
P56537	EIF6	Eukaryotic translation initiation factor 6	33066.1	40671.2	58634.4	57162.9	62745.3	62258.5	47727	20743.8	48517.5	45001.6	56162.1	47856	83413	44665.6	42229.1	47337.5
A8MUM1;C9JVR6;Q53HC9	EIPR1	Isoform of Q53HC9, EARP-interacting protein;Isoform of Q53HC9, EARP-interacting protein (Fragment);EARP-interacting protein	NaN	NaN	NaN	NaN	3082.36	2764.05	3133.69	NaN	2345.54	2747.17	3059.72	NaN	2096.61	2313.33	2462.11	NaN
Q15717;Q15717-2	ELAVL1	ELAV-like protein 1;Isoform of Q15717, Isoform 2 of ELAV-like protein 1	18574.1	28657.3	27853.4	12521.8	16109.2	13988.9	11502.9	20556.5	13228.6	15849.1	14365.5	12050.8	14990.4	14572.9	18712.4	11031.6
D6RBS5;Q8IZ81	ELMOD2	Isoform of Q8IZ81, ELMO domain-containing protein 2 (Fragment);ELMO domain-containing protein 2	NaN	NaN	4524.52	NaN	NaN	NaN	NaN	NaN	NaN	NaN	2535.31	NaN	2938.02	NaN	3979.89	3011.48
B8ZZU8;Q15370	ELOB	Isoform of Q15370, Elongin-B;Elongin-B	260313	277591	260711	265859	269856	290824	226526	259735	274399	253249	205835	206284	293987	247149	253718	261822
E5RHG8;Q15369	ELOC	Isoform of Q15369, Elongin-C (Fragment);Elongin-C	99917.6	127461	110431	111615	108122	117088	114900	82546.7	93552.6	106052	100710	106262	69401.7	106170	120929	98898.9
F5H2T0;O95163	ELP1	Isoform of O95163, Elongator complex protein 1;Elongator complex protein 1	236858	157319	296582	NaN	346493	235436	266942	310580	363086	311561	230640	315803	370388	300676	283560	372368
Q8N766;Q8N766-2;Q8N766-3;Q8N766-4	EMC1	ER membrane protein complex subunit 1;Isoform of Q8N766, Isoform 2 of ER membrane protein complex subunit 1;Isoform of Q8N766, Isoform 3 of ER membrane protein complex subunit 1;Isoform of Q8N766, Isoform 4 of ER membrane protein complex subunit 1	37265.3	57192.6	68461.9	152096	102959	75317.6	61107	86761.8	92951.5	92881.1	33516.1	68087.7	103459	60757.8	21723.9	60855.4
Q15006	EMC2	ER membrane protein complex subunit 2	NaN	2179.78	4972.07	NaN	4937.82	NaN	4826.91	NaN	NaN	8007.49	4842.75	NaN	NaN	3879.22	NaN	11553
H0YDT8;Q9NPA0	EMC7	Isoform of Q9NPA0, ER membrane protein complex subunit 7 (Fragment);ER membrane protein complex subunit 7	7476.84	NaN	NaN	NaN	520.255	NaN	NaN	2557.32	5237.36	NaN	5630.19	7967.03	NaN	NaN	8724.69	3902.58
O43402;O43402-2	EMC8	ER membrane protein complex subunit 8;Isoform of O43402, Isoform 2 of ER membrane protein complex subunit 8	12567.2	9515.1	9613.54	NaN	14025.1	7803	8102.65	7318.05	9341.03	9639.35	7748.35	9184.3	9392.42	10985.9	12222.2	8703.38
Q9ULC0;Q9ULC0-3	EMCN	Endomucin;Isoform of Q9ULC0, Isoform 3 of Endomucin	17874.8	9047.76	21612.4	11735.6	18525	18998.6	13559.7	14623.5	25266.2	18438	14563.3	19754.1	19276.3	41297.2	19194.2	23422.9
P50402	EMD	Emerin	66409.1	61906	86697.7	67481.4	87089.7	97721.9	64922.7	63970.6	87726.5	86101.5	46358.4	95908.5	118652	177999	99868.6	104493
Q9Y6C2	EMILIN1	EMILIN-1	11396.1	12888.7	12265.8	15616.7	15965.1	5232.1	11201.7	12877.3	12203.2	7291.89	2960.1	7876.4	15390.1	14065	18466.4	6996.28
F8W717;O00423;O00423-3	EML1	Isoform of O00423, Echinoderm microtubule-associated protein-like 1;Echinoderm microtubule-associated protein-like 1;Isoform of O00423, Isoform 3 of Echinoderm microtubule-associated protein-like 1	17163.2	22483.5	20364	5360.8	14441	18554	15729.4	13678.4	14017.3	10152.9	10580.3	15274.2	16698.7	11714.3	15406.8	16145
A0A0C4DGQ7;C9JRL6;K7EIK7;O95834;O95834-2;O95834-3	EML2	Isoform of O95834, Echinoderm microtubule-associated protein-like 2;Isoform of O95834, Echinoderm microtubule-associated protein-like 2;Isoform of O95834, Echinoderm microtubule-associated protein-like 2;Echinoderm microtubule-associated protein-like 2;Isoform of O95834, Isoform 2 of Echinoderm microtubule-associated protein-like 2;Isoform of O95834, Isoform 3 of Echinoderm microtubule-associated…	24338.1	37364.5	28514	18143.2	7751.21	16715.3	14929.2	15486.7	3265.44	17301	18563.8	7651.05	17784.8	12632.8	NaN	10602.9
B5MBZ0;Q9HC35;Q9HC35-2	EML4	Isoform of Q9HC35, Echinoderm microtubule-associated protein-like 4;Echinoderm microtubule-associated protein-like 4;Isoform of Q9HC35, Isoform 2 of Echinoderm microtubule-associated protein-like 4	189818	121442	218584	206356	259574	202391	138804	145959	248244	225160	101905	320444	253978	352232	159335	208064
A0A0U1RRM6;Q8N8S7;Q8N8S7-2;Q8N8S7-3	ENAH	Isoform of Q8N8S7, Protein enabled homolog;Protein enabled homolog;Isoform of Q8N8S7, Isoform 2 of Protein enabled homolog;Isoform of Q8N8S7, Isoform 3 of Protein enabled homolog	8039.07	NaN	5517.12	33757.8	24567.4	NaN	NaN	NaN	NaN	16032	44881.4	3960.23	9561.98	17152.9	15787.9	27693.5
O94919	ENDOD1	Endonuclease domain-containing 1 protein	76010.3	92154.7	97696.3	90780.3	133395	92352.2	100984	82438.3	76655.2	82275.6	88863	107272	112146	90031	83595.5	76381.8
Q14249	ENDOG	Endonuclease G, mitochondrial	140812	109658	75596.9	112105	96494.3	156173	59919.6	121775	184217	143171	137362	115433	163496	126853	127988	170622
P17813;P17813-2	ENG	Endoglin;Isoform of P17813, Isoform Short of Endoglin	NaN	NaN	4171.38	NaN	NaN	NaN	NaN	NaN	NaN	2678.8	NaN	3990	2769.93	NaN	NaN	NaN
P06733	ENO1	Alpha-enolase	436243	515460	643268	542363	707676	609191	492393	463142	383776	476232	344280	631899	528794	367483	417271	512298
P09104;P09104-2	ENO2	Gamma-enolase;Isoform of P09104, Isoform 2 of Gamma-enolase	413021	782769	656968	563958	684789	506577	432559	592018	563822	549061	394321	593194	475121	516387	523902	334602
P13929	ENO3	Beta-enolase	27794994	25980576	36725096	35339372	36159556	21885676	29391128	25530638	33813472	30003188	20306532	37494536	32818236	20067104	22868744	25947234
A0A087WZY6	ENO4	Isoform of A6NNW6, Enolase 4	11377	11177.4	NaN	NaN	NaN	NaN	15914.3	17920.4	14239.7	NaN	NaN	10952.4	NaN	10288.9	14953.9	20258.4
Q9UHY7	ENOPH1	Enolase-phosphatase E1	62716	63208	57827.9	59532.6	54852.2	62259.4	16333.3	14656	63052.6	46669.1	18754	49527.1	49626.4	71093	18038	36430.2
Q9Y6X5	ENPP4	Bis(5'-adenosyl)-triphosphatase ENPP4	1616.21	NaN	3583.28	3713.72	1399.38	5149.38	108112	1896.82	8886.76	5764.84	1564.89	6122.06	6640.48	7813.23	113588	5623.75
A0A1W2PRU0;A6NMQ3;O43768;O43768-2;O43768-3;O43768-4;O43768-9;Q5T5H1	ENSA	Isoform of O43768, Alpha-endosulfine;Isoform of O43768, Alpha-endosulfine;Alpha-endosulfine;Isoform of O43768, Isoform 2 of Alpha-endosulfine;Isoform of O43768, Isoform 3 of Alpha-endosulfine;Isoform of O43768, Isoform 4 of Alpha-endosulfine;Isoform of O43768, Isoform 9 of Alpha-endosulfine;Isoform of O43768, Alpha-endosulfine	91424	101914	95805.9	85685	114232	113871	68877.8	72567.4	90793	92020.6	61635.7	102270	121113	168386	98096.6	68440.2
P49961;P49961-2;P49961-3;P49961-5;P49961-6	ENTPD1	Ectonucleoside triphosphate diphosphohydrolase 1;Isoform of P49961, Isoform 2 of Ectonucleoside triphosphate diphosphohydrolase 1;Isoform of P49961, Isoform 3 of Ectonucleoside triphosphate diphosphohydrolase 1;Isoform of P49961, Isoform 5 of Ectonucleoside triphosphate diphosphohydrolase 1;Isoform of P49961, Isoform 6 of Ectonucleoside triphosphate diphosphohydrolase 1	NaN	NaN	5104.52	NaN	8225.64	NaN	1818.99	NaN	NaN	2655.39	NaN	3212.42	3340.67	NaN	NaN	NaN
E5RHX8;Q9NPA8;Q9NPA8-2	ENY2	Isoform of Q9NPA8, Transcription and mRNA export factor ENY2;Transcription and mRNA export factor ENY2;Isoform of Q9NPA8, Isoform 2 of Transcription and mRNA export factor ENY2	NaN	NaN	NaN	13296.6	NaN	7000.05	NaN	NaN	NaN	NaN	59988	17725.5	10920	NaN	3439.74	3864.95
P11171;P11171-2	EPB41	Protein 4.1;Isoform of P11171, Isoform 2 of Protein 4.1	28701.5	28008.3	31861.4	39988.3	21997.4	20903.5	14552.2	11391.7	13723.9	15053.8	17142.4	21328.5	24228.9	16931.2	24667.5	20295.3
E9PHY5;O43491	EPB41L2	Isoform of O43491, Band 4.1-like protein 2;Band 4.1-like protein 2	20761.2	19930.1	19769.9	24569.8	21319.6	32841.7	22750.6	19540.3	24536.3	25234.7	14163.6	16706.9	35070.3	29825.9	24175.9	25254.8
E9PMG5	EPB41L2	Isoform of O43491, Band 4.1-like protein 2 (Fragment)	5096.2	4143.61	8527.49	7115.57	7844.12	9785.31	6221.72	6387.74	9561.06	6262.17	3585.98	7582.57	8460.05	6630.62	6737.43	7062.25
A8K968;Q9Y2J2-2	EPB41L3	Isoform of Q9Y2J2, Band 4.1-like protein 3;Isoform of Q9Y2J2, Isoform 2 of Band 4.1-like protein 3	29035.9	4207.07	14151.7	9844.12	3675.93	24161.9	10382.8	29034.1	14065.1	12247.3	13180.7	8143	15233.6	15572.7	23092.9	NaN
P16452;P16452-2;P16452-3	EPB42	Erythrocyte membrane protein band 4.2;Isoform of P16452, Isoform Long of Erythrocyte membrane protein band 4.2;Isoform of P16452, Isoform 3 of Erythrocyte membrane protein band 4.2	54680	44887.7	42530.5	65739.8	52953.6	30091.9	32290.7	20770.8	23315.2	16768.2	35091.8	33427.7	40207.7	21298.4	43733.7	28442.9
Q9UM22	EPDR1	Mammalian ependymin-related protein 1	61873.2	44680.3	47875.7	20448.2	51275.3	46989.4	35089	41171.9	61457.2	40548.4	42073.8	49090.1	54170.4	81293	57039.5	46978.4
P07099	EPHX1	Epoxide hydrolase 1	60541.9	53055.9	65130.8	50990.8	46812.3	40548.5	41518.4	63452.7	72887.7	53682.8	50938.5	49585.3	44114	57278.6	58179.2	80048.6
P34913	EPHX2	Bifunctional epoxide hydrolase 2	7428.15	8965.96	19963.8	13643.2	21405.2	13633.4	13886.4	22500.9	15567.5	17943.9	10786.7	24419.3	16179.4	9931.63	10298.2	33869.5
O95278	EPM2A	Isoform of B3EWF7, Laforin	82386.8	76353.6	69183.4	58175.2	90479.3	90235.2	123373	66533.8	92815	87204.3	62848.6	99721.9	86772.6	80197.1	74877.1	105366
Q9Y6I3;Q9Y6I3-1;Q9Y6I3-3	EPN1	Epsin-1;Isoform of Q9Y6I3, Isoform 2 of Epsin-1;Isoform of Q9Y6I3, Isoform 3 of Epsin-1	2754.11	NaN	13725.5	7550.26	13119.8	29558.7	22821.6	NaN	29607.4	23540.5	NaN	19989.1	17843.4	32298.2	14385.4	21351.7
P58107	EPPK1	Epiplakin	NaN	NaN	40595	33457.6	35260.3	NaN	25633.6	NaN	19869.5	29026.3	NaN	40998.9	28794.1	NaN	NaN	14902.2
P07814	EPRS	Bifunctional glutamate/proline--tRNA ligase	19220.2	17531.8	16644.7	18347	19596.9	18970.1	14023.4	15990.8	23888.5	21150.9	19737.5	19338.9	20785.6	16846.3	23429.3	24266.5
P42566	EPS15	Epidermal growth factor receptor substrate 15	5680.48	19815.7	4913.82	5111.24	16806.8	12561.5	8449.17	3830.91	5619.46	4137.46	4983.01	14581.1	4570.77	13587.6	29555.6	5889.85
Q9UBC2;Q9UBC2-2;Q9UBC2-3	EPS15L1	Epidermal growth factor receptor substrate 15-like 1;Isoform of Q9UBC2, Isoform 2 of Epidermal growth factor receptor substrate 15-like 1;Isoform of Q9UBC2, Isoform 3 of Epidermal growth factor receptor substrate 15-like 1	41992.8	25610.1	30368	20814.4	34757.2	29988.6	23463.5	21784.4	33208	21880.7	23498.2	15546.4	25247.6	29072.5	26091.2	25282.5
Q9NZ08;Q9NZ08-2	ERAP1	Endoplasmic reticulum aminopeptidase 1;Isoform of Q9NZ08, Isoform 2 of Endoplasmic reticulum aminopeptidase 1	NaN	NaN	14002.1	2058.72	5796.34	10139.5	7955.99	16121.1	7980.4	926.747	4586.49	5050.92	13212.7	12842.2	5681.43	13478.8
H7C4G9;O15083	ERC2	Isoform of O15083, ERC protein 2 (Fragment);ERC protein 2	47202	68988.6	97169.2	23555	61180	114354	41118.3	9008755	41495.1	32325.4	32229.4	70181.5	42388.9	100624	43871.5	50425.2
Q969X5;Q969X5-2	ERGIC1	Endoplasmic reticulum-Golgi intermediate compartment protein 1;Isoform of Q969X5, Isoform 2 of Endoplasmic reticulum-Golgi intermediate compartment protein 1	5187.06	NaN	5784.72	2845.41	7050.74	5593.37	3787.57	4584.98	5524.72	6221.18	NaN	6857.14	7246.01	8960.04	7382.29	7056.5
P84090	ERH	Enhancer of rudimentary homolog	200334	224332	248445	188312	200609	253475	179391	152475	216521	217932	167200	171406	214725	380560	214364	199863
H0Y4B0;O43414;O43414-2;O43414-3	ERI3	Isoform of O43414, ERI1 exoribonuclease 3 (Fragment);ERI1 exoribonuclease 3;Isoform of O43414, Isoform 2 of ERI1 exoribonuclease 3;Isoform of O43414, Isoform 3 of ERI1 exoribonuclease 3	40143.2	36605.9	11157.1	NaN	12207.9	1656.52	18782.6	24998.1	NaN	7075.65	48389.7	37799.6	NaN	NaN	39996.4	74164.1
E5RHW4;O94905	ERLIN2	Isoform of O94905, Erlin-2 (Fragment);Erlin-2	20417.9	17994.2	16077.4	23766.8	19291.1	16486.8	16063.9	16735	20201.1	20328	28174.4	19920.9	14243.7	28789.2	21005	17764.1
A0A0C4DGF0;E7ER77;Q7Z2K6;Q7Z2K6-2	ERMP1	Isoform of Q7Z2K6, Endoplasmic reticulum metallopeptidase 1;Isoform of Q7Z2K6, Endoplasmic reticulum metallopeptidase 1;Endoplasmic reticulum metallopeptidase 1;Isoform of Q7Z2K6, Isoform 2 of Endoplasmic reticulum metallopeptidase 1	NaN	NaN	NaN	NaN	NaN	NaN	NaN	NaN	NaN	NaN	NaN	1933.61	2323.68	NaN	NaN	2704.43
Q96HE7	ERO1A	ERO1-like protein alpha	7750.21	16011.2	8525.33	9946.61	8973.42	8139.11	6716.14	6184.18	7773.81	6109.58	5415.56	8871.85	9176.63	8193.15	7372.97	8513.08
P30040	ERP29	Endoplasmic reticulum resident protein 29	47683.2	52427.6	43291.5	57790.5	35238.1	34943.7	37809.9	43854.4	49748.6	39240	32689.2	58579.8	39671.5	61000.1	50425.1	45063.9
Q9BS26	ERP44	Endoplasmic reticulum resident protein 44	10106.2	12926.9	10001.1	7672.89	8767.19	6613.38	6089.17	3012.98	6750.98	6691.98	3315.26	8608.84	10896.5	9291.43	7882.24	8291.79
P10768	ESD	S-formylglutathione hydrolase	252990	279945	350055	342931	284647	278002	339124	235745	220209	210239	244985	262110	252878	261545	280961	186756
Q9BSJ8;Q9BSJ8-2	ESYT1	Extended synaptotagmin-1;Isoform of Q9BSJ8, Isoform 2 of Extended synaptotagmin-1	19641.9	12165.8	14525.6	11388.4	13398.2	16193	15416.4	16729.6	19230.5	19298.1	16883.8	17033.8	19424.8	17801.5	18082.3	25852.8
A0FGR8-2;H7BXI1	ESYT2	Isoform of A0FGR8, Isoform 2 of Extended synaptotagmin-2;Isoform of A0FGR8, Extended synaptotagmin-2 (Fragment)	17129.8	12009	12798	7715.01	10625.4	10311.3	7024.95	12100.7	13228.7	10528.8	10432.4	9672.48	12905.7	14688.8	20912.6	14300.1
B7Z7P8;P62495;P62495-2	ETF1	Isoform of P62495, Eukaryotic peptide chain release factor subunit 1;Eukaryotic peptide chain release factor subunit 1;Isoform of P62495, Isoform 2 of Eukaryotic peptide chain release factor subunit 1	NaN	NaN	NaN	NaN	NaN	NaN	NaN	2427.4	3147.25	5647.05	4306.37	6515.41	6554.99	15645.1	10098.1	7441.35
P13804	ETFA	Electron transfer flavoprotein subunit alpha, mitochondrial	434788	507132	384925	404680	391116	501095	397629	404538	467492	526464	451562	623520	441022	424738	492119	475596
P38117	ETFB	Electron transfer flavoprotein subunit beta	594218	632313	731662	370284	390536	935974	553160	717514	857747	765020	522335	980072	586565	761678	845028	917515
Q16134	ETFDH	Electron transfer flavoprotein-ubiquinone oxidoreductase, mitochondrial	436342	478101	368458	297352	284176	479246	436202	406699	527605	623363	330556	394262	392433	317422	511742	510308
A0A0C4DGJ8;Q6IPR1	ETFRF1	Isoform of Q6IPR1, Electron transfer flavoprotein regulatory factor 1;Electron transfer flavoprotein regulatory factor 1	11773.1	10222.2	8869.32	6501.01	4816.85	7523.94	9500.83	6572.04	17751.7	18130.6	13670.4	10401.5	8702.41	7099.15	11692.5	9056.87
O95571	ETHE1	Persulfide dioxygenase ETHE1, mitochondrial	31970.8	32952.3	52831.8	27240.3	38530.8	44978.4	32243.9	35680.2	55762.7	57084.3	47946.9	57511	61783	26141.7	40182.7	56395.4
M0R1Y1;Q96CN4;Q96CN4-2	EVI5L	Isoform of Q96CN4, EVI5-like protein (Fragment);EVI5-like protein;Isoform of Q96CN4, Isoform 2 of EVI5-like protein	NaN	41891.8	11016.4	NaN	32781.2	56977.1	25404.1	25630.2	23943.9	11763	9223.34	16895.5	31531.2	58342.9	NaN	32785.6
B0QYK0;Q01844;Q01844-3;Q01844-5;Q01844-6	EWSR1	Isoform of Q01844, RNA-binding protein EWS;RNA-binding protein EWS;Isoform of Q01844, Isoform 3 of RNA-binding protein EWS;Isoform of Q01844, Isoform 5 of RNA-binding protein EWS;Isoform of Q01844, Isoform 6 of RNA-binding protein EWS	77988	88568.5	119443	85208.8	70764.1	28292.6	475631	66938	62506.1	56770.5	39244.6	58427.9	92044.5	109408	58547.1	40960.9
Q96A65	EXOC4	Exocyst complex component 4	3148.12	NaN	9573.78	NaN	NaN	6261.62	2793.92	NaN	NaN	NaN	2468.15	NaN	3412.83	NaN	3572.75	2247.9
E7ESD5;E9PLN6;F2Z2Y1;O95677;O95677-2;O95677-4;O95677-5	EYA4	Isoform of O95677, Eyes absent homolog;Isoform of O95677, Eyes absent homolog;Isoform of O95677, Eyes absent homolog;Eyes absent homolog 4;Isoform of O95677, Isoform 2 of Eyes absent homolog 4;Isoform of O95677, Isoform 4 of Eyes absent homolog 4;Isoform of O95677, Isoform 5 of Eyes absent homolog 4	911.633	NaN	1560.91	1353.15	1992.44	1815.35	3249.62	NaN	5036.12	1199.62	NaN	1575.88	1762.07	9023.83	NaN	6356.81
E7EQR4;P15311	EZR	Isoform of P15311, Ezrin;Ezrin	20947.8	5679.57	8939.96	8847.84	16822.4	18797	7499.23	5429.62	24683.6	9911.6	6640.32	9403.99	22860.4	34638.6	27401.7	15656.6
P00748	F12	Coagulation factor XII	NaN	NaN	NaN	NaN	4206.22	14180.6	NaN	NaN	5721.25	NaN	NaN	2558.47	1294.47	19314.9	2855.1	3487.24
P00488	F13A1	Coagulation factor XIII A chain	13339	11720.2	9141.83	9099.4	11392.3	11748.2	8774.01	8253.59	14433.6	10202.6	9149.34	10580.3	14653.4	28943.1	15768.5	12188.3
P00734	F2	Prothrombin	32642.9	33533.9	32884.7	38224.9	19576.4	25198.6	22646.4	7989.17	30826.7	26319.1	21758	43320.6	19266.7	25127.7	27526.9	27161.4
P05413;S4R371	FABP3	Fatty acid-binding protein, heart;Isoform of P05413, Fatty acid-binding protein, heart (Fragment)	2.01651e+06	2559860	1.75133e+06	1.98758e+06	1.86322e+06	3.14741e+06	2.6507e+06	2.88538e+06	3.1856e+06	2.63921e+06	2.59632e+06	3748980	2.49065e+06	3.5527e+06	2858576	3384898
P15090	FABP4	Fatty acid-binding protein, adipocyte	117833	124217	110834	181347	130727	140242	140179	210992	177600	165163	164463	135995	165468	115506	236839	195772
Q01469	FABP5	Fatty acid-binding protein, epidermal	148223	103071	88130.3	68579.3	92230.1	152602	127933	128343	184873	91939.9	112210	103273	115252	233584	194548	143374
Q13158	FADD	FAS-associated death domain protein	NaN	NaN	NaN	NaN	NaN	NaN	NaN	1855.53	2201.28	NaN	2110.12	2446.38	NaN	1797.03	2239.91	1501.78
Q9UNN5	FAF1	FAS-associated factor 1	6231.24	4765.63	6013.98	9794.01	18980.5	9983.97	7428.11	11418	11634	12556	10884.9	10244.2	14126.3	13583.2	13787.8	12190.5
P16930	FAH	Fumarylacetoacetase	40165.5	45507.4	89132	58466.4	56321.2	63600.1	52690.3	41443.5	59719.3	38673.7	47039.8	64003.8	56656	68663.1	41795.2	48435.4
Q6P587	FAHD1	Acylpyruvase FAHD1, mitochondrial	198724	168106	113570	206220	165414	90859.4	111598	196517	247161	170051	138889	163783	169761	132187	103592	121608
Q96GK7	FAHD2A	Fumarylacetoacetate hydrolase domain-containing protein 2A	56346.1	50550.5	41864.7	33650.1	32864.1	27220.8	21672.7	35090.9	52888.7	46875	47519.2	50341.2	41816.7	37111.4	37322.5	33159.9
Q8IWE2	FAM114A1	Protein NOXP20	203262	82119.7	14638.5	241936	12513.4	10311.6	11132.9	126513	9142.25	14106.1	5382.21	12652.4	11755.5	18281.6	66093.7	10032.2
Q9NRY5	FAM114A2	Protein FAM114A2	3713.01	4374.93	7873.68	3280.21	4447.66	7159.13	4664.61	3540.41	7501.58	6991.84	5233.45	9135.09	7986.6	8687.52	7065.82	8279.76
Q9NZB2;Q9NZB2-6	FAM120A	Constitutive coactivator of PPAR-gamma-like protein 1;Isoform of Q9NZB2, Isoform F of Constitutive coactivator of PPAR-gamma-like protein 1	11775.1	NaN	7489.97	NaN	NaN	1	NaN	NaN	5471.6	2808.67	6947.77	5712.1	5354.46	19610.9	8976.11	12221.6
Q9BZQ8	FAM129A	Protein Niban	60561.8	13329.3	37760.7	32074.3	23412.6	22302.4	24516.8	41032.5	36860.3	27855	32259.3	30778	27100.5	19981.5	22033.9	49280
Q96C01	FAM136A	Protein FAM136A	27019	36721.4	24728.8	23453.4	17726.9	26708.2	30461.5	26908.5	32280.3	38372.5	24186.4	44025.6	36419	42631.8	33219.7	51155.2
F8W7Q4;Q96A26	FAM162A	Isoform of Q96A26, Protein FAM162A;Protein FAM162A	55147.3	47517.6	46396.9	117451	36179.1	32439.8	19335	26486	76517.1	62938.8	45104.3	56312.8	51709.9	56820.2	68370	92322.9
K7EK00;Q96ND0	FAM210A	Isoform of Q96ND0, Protein FAM210A (Fragment);Protein FAM210A	17889.8	18306.4	NaN	16597.1	NaN	26746.4	17023.2	26143.1	18359.3	19301.5	22418.2	14737.6	25570.8	17731.1	19215.7	14985.2
Q96KR6	FAM210B	Protein FAM210B, mitochondrial	9022.97	6369.86	NaN	NaN	NaN	NaN	5312.74	8434.73	11678	NaN	7920.86	10013.1	NaN	5674.37	8224.19	10833.8
Q9BRX8;Q9BRX8-2	FAM213A	Redox-regulatory protein FAM213A;Isoform of Q9BRX8, Isoform 2 of Redox-regulatory protein FAM213A	23577.4	23794.8	34910.8	26134.9	25822.1	28394	24459.6	23888.9	32286.9	28354.2	33438	23664.7	27117.5	24587.7	26686.1	26393.7
H7C2U8;Q9H0X4	FAM234A	Isoform of Q9H0X4, Protein FAM234A (Fragment);Protein FAM234A	NaN	NaN	NaN	NaN	NaN	NaN	3406.99	3600.66	4358.93	NaN	3955.46	NaN	NaN	4516.88	3729.13	NaN
Q9NUQ9	FAM49B	Protein FAM49B	33211.5	22772	36657.9	29260.8	39031.3	37318.8	37430	35028.4	30868.8	27373.7	32977.4	37481	22812.6	35014.2	29497.1	34088.6
Q9H5X1	FAM96A	MIP18 family protein FAM96A	NaN	NaN	NaN	4424.15	4706.86	NaN	NaN	NaN	NaN	9326.16	10140.5	4676.35	7275.15	NaN	NaN	8087.98
H3BNV7;Q9Y3D0	FAM96B	Isoform of Q9Y3D0, Mitotic spindle-associated MMXD complex subunit MIP18 (Fragment);Mitotic spindle-associated MMXD complex subunit MIP18	NaN	NaN	NaN	749.565	1234.58	NaN	836.798	NaN	NaN	NaN	NaN	NaN	NaN	NaN	4446.78	NaN
E9PH82;Q8NCA5;Q8NCA5-2	FAM98A	Isoform of Q8NCA5, Protein FAM98A;Protein FAM98A;Isoform of Q8NCA5, Isoform 2 of Protein FAM98A	NaN	NaN	1484.71	NaN	1742.75	NaN	1227.43	NaN	NaN	1637.74	1154.62	1942.95	2272.08	NaN	NaN	2129.71
Q52LJ0;Q52LJ0-2	FAM98B	Protein FAM98B;Isoform of Q52LJ0, Isoform 2 of Protein FAM98B	12798.6	6819.71	10113.4	8406.1	11534.4	11503.7	NaN	10329.6	12485.6	9492.48	12538	8203.9	11305.9	9473.25	10991.5	12506.7
K7ER00;Q9Y285;Q9Y285-2	FARSA	Isoform of Q9Y285, Phenylalanine--tRNA ligase alpha subunit;Phenylalanine--tRNA ligase alpha subunit;Isoform of Q9Y285, Isoform 2 of Phenylalanine--tRNA ligase alpha subunit	20025.1	20795	6356.96	2595.96	15263.5	7548.77	21192.3	13168.2	17175.4	23853	13040	12520	14914	16373.2	22631.7	24914.8
Q9NSD9	FARSB	Phenylalanine--tRNA ligase beta subunit	12056.1	10481.4	11615.3	10760	11667.4	9041.78	12623.3	12260.6	8082.01	13496.8	12129.9	11761.5	13162.9	11152.5	14263.1	11813.8
A0A0U1RQF0;P49327	FASN	Isoform of P49327, Fatty acid synthase;Fatty acid synthase	NaN	NaN	NaN	5650.04	NaN	NaN	NaN	NaN	NaN	NaN	2064.58	NaN	NaN	NaN	2079.3	1148.7
M0QXL5;M0R299;P22087	FBL	Isoform of P22087, rRNA 2'-O-methyltransferase fibrillarin (Fragment);Isoform of P22087, rRNA 2'-O-methyltransferase fibrillarin (Fragment);rRNA 2'-O-methyltransferase fibrillarin	99257.7	64868.5	42965.4	84317	43511.6	11414.2	NaN	21562.9	21961	32534.9	39678.7	NaN	63742.7	38627.7	32396.9	35590.2
P23142	FBLN1	Fibulin-1	50211.1	27555	19967.7	25310.4	26213.1	14436.6	10962.7	17775.5	17104.8	15620.9	33733.7	19938.5	18811	29413	25263.5	14772.8
P98095;P98095-2	FBLN2	Fibulin-2;Isoform of P98095, Isoform 2 of Fibulin-2	16091.1	16664.1	17374.7	2995.26	18440	15435	11358.9	20691.4	12005.9	20408.7	11455.9	10122.6	15086	16390.8	26326.7	10361.9
G3V4U0;G3XA98;Q9UBX5	FBLN5	Isoform of Q9UBX5, Fibulin-5;Isoform of Q9UBX5, Fibulin 5, isoform CRA_a;Fibulin-5	37381.9	11460.4	26150.5	15215.8	30236.6	31833.2	31978.8	33789.2	37965.2	11296	20853.1	27353.5	24777	24746.2	53580	29853
P35555	FBN1	Fibrillin-1	95955.3	127424	89986.5	102131	112169	99292.6	79859.7	99976.9	74463.4	73771.4	99762	84508.4	102207	126183	138894	76928.3
P09467	FBP1	Fructose-1,6-bisphosphatase 1	719097	366765	725577	451640	403825	310005	334402	513210	714101	753422	445037	512514	657950	604861	366482	723739
O00757	FBP2	Fructose-1,6-bisphosphatase isozyme 2	495851	594583	937670	513228	526871	521081	493758	678450	844359	893057	547729	721376	843769	504234	481323	945077
D6RCR7;D6RHC3;H0YAG2;Q9UKA1;Q9UKA1-2	FBXL5	Isoform of Q9UKA1, F-box/LRR-repeat protein 5 (Fragment);Isoform of Q9UKA1, F-box/LRR-repeat protein 5 (Fragment);Isoform of Q9UKA1, F-box/LRR-repeat protein 5 (Fragment);F-box/LRR-repeat protein 5;Isoform of Q9UKA1, Isoform 2 of F-box/LRR-repeat protein 5	NaN	NaN	6992.15	NaN	5030.94	10740.1	NaN	NaN	NaN	NaN	NaN	NaN	NaN	6968.97	NaN	NaN
J3KQ72;Q9NRD1	FBXO6	Isoform of Q9NRD1, F-box only protein 6 (Fragment);F-box only protein 6	1486.43	NaN	NaN	NaN	NaN	NaN	NaN	2643.22	1570.19	NaN	1904.15	2372.62	NaN	NaN	1951.9	3202.22
Q9Y3I1;Q9Y3I1-2;Q9Y3I1-3	FBXO7	F-box only protein 7;Isoform of Q9Y3I1, Isoform 2 of F-box only protein 7;Isoform of Q9Y3I1, Isoform 3 of F-box only protein 7	26911	29280.5	49900.6	63662.5	42015.5	18402.2	24189.5	20095.5	NaN	NaN	18400.3	26355.9	39053.3	NaN	34373.9	22434.2
P14324;P14324-2	FDPS	Farnesyl pyrophosphate synthase;Isoform of P14324, Isoform 2 of Farnesyl pyrophosphate synthase	37153.7	35786.1	24927.9	20799.4	33742.9	29871.2	111313	26151.2	34359.7	26724.8	28358.4	27512.1	20036.2	19009.8	42165.7	40243
P10109	FDX1	Adrenodoxin, mitochondrial	15535.9	25571.4	23974.8	13506.9	15452.8	43595.3	17252.3	6738.94	36213.3	17285.1	8533.91	30479.8	25320.7	44983.6	20845.3	30360.1
P22830;P22830-2	FECH	Ferrochelatase, mitochondrial;Isoform of P22830, Isoform 2 of Ferrochelatase, mitochondrial	58511.1	41616.9	63376.1	26362.1	41536.6	36227.9	35388.1	35374.2	57481.2	43328.5	44708.7	38795.6	46540	23960.8	33192	30240.2
A9Z1Z3;A9Z1Z3-3	FER1L4	Fer-1-like protein 4;Isoform of A9Z1Z3, Isoform 3 of Fer-1-like protein 4	NaN	NaN	NaN	2743.88	NaN	NaN	NaN	NaN	NaN	30045.7	NaN	NaN	NaN	8436.93	NaN	5737.22
H0YJ34;Q96AC1;Q96AC1-3	FERMT2	Isoform of Q96AC1, Fermitin family homolog 2 (Fragment);Fermitin family homolog 2;Isoform of Q96AC1, Isoform 3 of Fermitin family homolog 2	35343.1	44957.6	46466.1	20884.9	13064.5	16933.6	41725.4	29167.2	40404.7	10348.5	32204.6	44339.1	13107.2	21053.7	35469.9	42202
F5H1C6;Q86UX7;Q86UX7-2	FERMT3	Isoform of Q86UX7, Fermitin family homolog 3 (Fragment);Fermitin family homolog 3;Isoform of Q86UX7, Isoform 2 of Fermitin family homolog 3	NaN	NaN	NaN	NaN	NaN	NaN	NaN	NaN	NaN	NaN	NaN	NaN	NaN	6259.47	9226.44	NaN
P02671;P02671-2	FGA	Fibrinogen alpha chain;Isoform of P02671, Isoform 2 of Fibrinogen alpha chain	275538	392528	245354	676158	315778	198416	163803	159072	228434	298231	405869	339020	366099	215140	402219	333079
P02675	FGB	Fibrinogen beta chain	180445	252716	156088	444866	221170	104896	100218	79811.4	170283	194895	262176	308196	255675	111643	218054	206196
C9JC84;C9JEU5;P02679;P02679-2	FGG	Isoform of P02679, Fibrinogen gamma chain;Isoform of P02679, Fibrinogen gamma chain;Fibrinogen gamma chain;Isoform of P02679, Isoform Gamma-A of Fibrinogen gamma chain	197278	334552	225579	417873	334163	177167	129065	133369	205140	307695	287525	353981	326948	158941	251514	295866
A0A0U1RRB9;F2Z2V1;Q96C11;Q96C11-3;Q96C11-5	FGGY	Isoform of Q96C11, FGGY carbohydrate kinase domain-containing protein;Isoform of Q96C11, FGGY carbohydrate kinase domain-containing protein;FGGY carbohydrate kinase domain-containing protein;Isoform of Q96C11, Isoform 4 of FGGY carbohydrate kinase domain-containing protein;Isoform of Q96C11, Isoform 5 of FGGY carbohydrate kinase domain-containing protein	12271.8	8961.23	14857.2	NaN	NaN	15405.9	44680.3	8802.33	72258.3	60539.2	58843.6	NaN	5983.21	10157.6	13980.4	14002.2
P07954;P07954-2	FH	Fumarate hydratase, mitochondrial;Isoform of P07954, Isoform Cytoplasmic of Fumarate hydratase, mitochondrial	779651	975882	640482	562909	582013	728451	548239	746744	925740	755634	805411	768263	641871	564790	780341	891515
P49789	FHIT	Bis(5'-adenosyl)-triphosphatase	37988.1	32475.8	15062.4	1737.13	NaN	45819.7	NaN	10321.2	30315.5	36970.1	17840.1	36757.9	45294.3	22327.4	14893.1	32255.2
Q13642-4;Q13642-5	FHL1	Isoform of Q13642, Isoform 4 of Four and a half LIM domains protein 1;Isoform of Q13642, Isoform 5 of Four and a half LIM domains protein 1	8544523	10649546	11813367	9783512	13662605	10797256	9734760	9780101	8690690	10820577	7376284	10295310	12510293	7.57519e+06	9802041	12154996
Q13643	FHL3	Four and a half LIM domains protein 3	1387928	1.31387e+06	1602275	1.5868e+06	1.68178e+06	1.48517e+06	1.49449e+06	1.5495e+06	1.36045e+06	1.09127e+06	1.10057e+06	1.43941e+06	1.44875e+06	1.3146e+06	1335028	1.65466e+06
Q9Y613	FHOD1	FH1/FH2 domain-containing protein 1	62055.3	48187.3	49843.3	58850.7	66725.9	63272.7	57545.5	47337	54212	61040.9	46117.9	59421.8	57088	41987.6	46822	65527.5
A0A075B6G6;Q7Z7B0;Q7Z7B0-2;Q7Z7B0-3	FILIP1	Isoform of Q7Z7B0, Filamin A interacting protein 1, isoform CRA_c;Filamin-A-interacting protein 1;Isoform of Q7Z7B0, Isoform 2 of Filamin-A-interacting protein 1;Isoform of Q7Z7B0, Isoform 3 of Filamin-A-interacting protein 1	5410.54	NaN	240639	NaN	16426.9	3313.2	505087	348380	869852	148162	NaN	386551	63377.2	1.7137e+06	NaN	628749
Q9Y3D6	FIS1	Mitochondrial fission 1 protein	110356	108299	105343	83879.1	119420	140428	86248.6	93253.5	141412	128340	91483.4	162583	138819	87634.4	121790	113711
A5D6W6;H0YL77	FITM1;	Fat storage-inducing transmembrane protein 1;Uncharacterized protein (Fragment)	23145.2	NaN	11001.6	21607.7	19980	17240.7	24837.8	28694.5	27082.6	26633.2	29080.4	21031.8	33598.4	19758.8	24369.5	32209.5
Q96AY3	FKBP10	Peptidyl-prolyl cis-trans isomerase FKBP10	NaN	NaN	NaN	NaN	NaN	NaN	NaN	NaN	NaN	NaN	NaN	NaN	NaN	12160	NaN	NaN
A0A0A0MT60;Q5T1M5;Q5T1M5-2;Q5T1M5-3;X6RKW4	FKBP15	Isoform of Q5T1M5, Peptidylprolyl isomerase (Fragment);FK506-binding protein 15;Isoform of Q5T1M5, Isoform 2 of FK506-binding protein 15;Isoform of Q5T1M5, Isoform 3 of FK506-binding protein 15;Isoform of Q5T1M5, Peptidylprolyl isomerase (Fragment)	NaN	NaN	NaN	NaN	NaN	NaN	NaN	NaN	736.933	NaN	982.686	NaN	886.263	NaN	NaN	NaN
P62942	FKBP1A	Peptidyl-prolyl cis-trans isomerase FKBP1A	797976	746226	890997	889968	1.29086e+06	1.06902e+06	988152	767339	900578	894834	854590	1.04428e+06	1.01286e+06	1.27285e+06	947279	939077
P26885	FKBP2	Peptidyl-prolyl cis-trans isomerase FKBP2	118516	88093.4	44285.1	11217.9	68804.3	104442	9289.55	59389.8	48363.5	40117.2	51189.6	64594.2	45746.6	114775	67869.7	6073.21
Q00688	FKBP3	Peptidyl-prolyl cis-trans isomerase FKBP3	769287	851888	794006	813106	857532	1.16627e+06	770975	852108	1.06147e+06	914330	668730	864539	988874	1.32477e+06	761673	914553
Q02790	FKBP4	Peptidyl-prolyl cis-trans isomerase FKBP4	14608.9	56700.3	4504.39	7887.4	4088.08	NaN	NaN	1999.11	8478.05	9524.73	8730.99	14672.2	6501.24	6869.97	7133.43	29780.7
Q13451	FKBP5	Peptidyl-prolyl cis-trans isomerase FKBP5	14904.9	14656.8	15872.9	18488.1	13586.2	22522.4	17700.5	19457	19365.9	19145.6	19822.5	21051	21072.1	14878.5	17659.6	19196
O95302;O95302-3	FKBP9	Peptidyl-prolyl cis-trans isomerase FKBP9;Isoform of O95302, Isoform 3 of Peptidyl-prolyl cis-trans isomerase FKBP9	NaN	NaN	NaN	NaN	NaN	7004.6	3542.52	NaN	11181	5028.94	3884.37	5074.92	12762.7	12603.6	12062.7	9325.62
Q8NFF5;Q8NFF5-2;Q8NFF5-3	FLAD1	FAD synthase;Isoform of Q8NFF5, Isoform 2 of FAD synthase;Isoform of Q8NFF5, Isoform 3 of FAD synthase	NaN	NaN	NaN	NaN	NaN	NaN	NaN	NaN	27296.6	NaN	29715.2	NaN	57631.4	NaN	NaN	NaN
Q13045;Q13045-2;Q13045-3	FLII	Protein flightless-1 homolog;Isoform of Q13045, Isoform 2 of Protein flightless-1 homolog;Isoform of Q13045, Isoform 3 of Protein flightless-1 homolog	4656.56	1485.67	4217.98	3027.69	4122.83	3961.78	3671.71	5804.24	7317.96	4921.41	3949.86	4905.39	5887.85	5443.23	5314.72	5675.75
P21333;P21333-2	FLNA	Filamin-A;Isoform of P21333, Isoform 2 of Filamin-A	391482	469951	363906	419063	414418	432077	581692	512629	472848	502090	503942	403676	455957	430372	529693	557382
O75369;O75369-2;O75369-8;O75369-9	FLNB	Filamin-B;Isoform of O75369, Isoform 2 of Filamin-B;Isoform of O75369, Isoform 8 of Filamin-B;Isoform of O75369, Isoform 9 of Filamin-B	780209	765787	638834	828580	814020	762525	887522	913973	669968	731888	792027	650788	615906	673089	692442	726423
Q14315	FLNC	Filamin-C	2322828	2467267	2.43625e+06	3.11129e+06	2983206	3069941	3533725	2777316	2.6425e+06	3.07607e+06	2.67874e+06	2.59359e+06	3.09539e+06	2408456	2.46805e+06	3409897
A0A140T9R1;O75955;O75955-2	FLOT1	Isoform of O75955, Flotillin-1 (Fragment);Flotillin-1;Isoform of O75955, Isoform 2 of Flotillin-1	12758.9	11911.5	9083.13	9119.62	9671.55	8583.98	7358.44	11939.7	9882.38	6862.08	6640.76	11575.9	8472.3	6663.23	14126.3	6717.79
E7EMK3;J3QLD9;Q14254	FLOT2	Isoform of Q14254, Flotillin-2;Isoform of Q14254, Flotillin-2;Flotillin-2	51840.3	36360.5	64712	42599.5	39723.4	44878.7	27832	32046.7	33843.3	29314.1	28930.2	34920.4	30238	39013.3	38172.3	20612.9
P02751;P02751-14;P02751-3;P02751-8	FN1	Fibronectin;Isoform of P02751, Isoform 14 of Fibronectin;Isoform of P02751, Isoform 3 of Fibronectin;Isoform of P02751, Isoform 8 of Fibronectin	37131.8	59984	37486.7	73699.3	51864.9	31811.8	33814.6	27418.3	34307.8	35728.5	39082.3	40639	62216.6	72033.1	56767.2	56819
Q9H479	FN3K	Fructosamine-3-kinase	13687.1	16894.6	23400.4	13681.9	18881.3	25427.5	9037.97	15653.4	19924.6	26071	18080.9	16168.2	21420.4	12361.3	11201.4	18528
Q9HA64	FN3KRP	Ketosamine-3-kinase	11262.4	16138	22181.2	5635	10189.9	3142.32	8241.17	NaN	6393.65	14788.4	8247.7	10877.5	9177.19	NaN	6755.62	4256.29
J3KNQ2;Q4ZHG4;Q4ZHG4-2	FNDC1	Isoform of Q4ZHG4, Fibronectin type III domain-containing protein 1 (Fragment);Fibronectin type III domain-containing protein 1;Isoform of Q4ZHG4, Isoform 2 of Fibronectin type III domain-containing protein 1	1.39732e+06	1.1374e+06	1505051	553384	1.81314e+06	1.28616e+06	989923	886266	821528	933035	901413	1246391	285934	946769	661181	861382
P49354;P49354-2	FNTA	Protein farnesyltransferase/geranylgeranyltransferase type-1 subunit alpha;Isoform of P49354, Isoform 2 of Protein farnesyltransferase/geranylgeranyltransferase type-1 subunit alpha	7043.61	5303.31	8448.89	9241.4	8965.7	13493.9	9134.7	8822	10620.6	7697.62	15105.6	9479.52	11825.2	10566.9	12896	10249.9
P49356	FNTB	Protein farnesyltransferase subunit beta	7552.48	NaN	NaN	NaN	13325.7	NaN	NaN	NaN	20205.8	13740.5	NaN	11342.1	16103.8	17328.7	NaN	23018.4
A0A087WWY2;E7EU04;F5GXV3;F5GZ45;F5H3Z4;F5H4Z6;F5H5L8;J3KQP4;P14207	FOLR2	Isoform of P14207, Folate receptor beta;Isoform of P14207, Folate receptor beta (Fragment);Isoform of P14207, Folate receptor beta (Fragment);Isoform of P14207, Folate receptor beta (Fragment);Isoform of P14207, Folate receptor beta (Fragment);Isoform of P14207, Folate receptor beta (Fragment);Isoform of P14207, Folate receptor beta (Fragment);Isoform of P14207, Folate receptor beta;Folate recept…	NaN	NaN	NaN	NaN	NaN	NaN	NaN	NaN	NaN	NaN	NaN	NaN	NaN	9954.79	NaN	NaN
Q16658	FSCN1	Fascin	11000.2	8381.73	4914.55	4353.04	4767.77	5185.61	5790.45	NaN	22671.6	29884.8	19153.5	7429.16	23028.7	18812.2	22420.3	17227.1
A1L4K1	FSD2	Fibronectin type III and SPRY domain-containing protein 2	12781.8	10940.9	13891.3	17095.4	11303.8	9227.64	8400.39	10318	12155.8	12975	9589.73	12271.9	13450.9	9605.33	7379.9	13760.6
P02794	FTH1	Ferritin heavy chain	620425	780928	1.33394e+06	845051	637506	752142	579312	570500	625870	1.08937e+06	886345	1.03631e+06	881197	1.36887e+06	477408	632699
P02792	FTL	Ferritin light chain	205551	143341	134775	117586	70533	64603.5	58506.3	90509.5	159477	122941	139954	128972	124027	250372	118824	42571.2
A0A1B0GTC3;A0A1B0GVH5;Q9C0B1	FTO	Isoform of Q9C0B1, Alpha-ketoglutarate-dependent dioxygenase FTO;Isoform of Q9C0B1, Alpha-ketoglutarate-dependent dioxygenase FTO;Alpha-ketoglutarate-dependent dioxygenase FTO	3345.65	NaN	8280.62	4996.82	7637.24	4255.56	6425.81	6000.31	5095.57	45541.8	3493.31	4485.31	3678.69	113108	85226.5	2668.27
Q96AE4-2	FUBP1	Isoform of Q96AE4, Isoform 2 of Far upstream element-binding protein 1	21413.1	39994.2	45938.3	28021.2	42231.8	22524.7	16995.8	22950	27206.4	41612.9	30471	40750.5	53211.1	78454.9	49603.6	44100.2
P04066	FUCA1	Tissue alpha-L-fucosidase	4684.83	NaN	4273.51	NaN	NaN	2313.53	NaN	NaN	2376.45	4234.1	NaN	NaN	NaN	4991.3	NaN	4810.71
Q9BWH2	FUNDC2	FUN14 domain-containing protein 2	455844	440295	526671	322614	402209	531244	302051	433357	670950	478431	447372	602139	515131	470407	518093	582321
H3BPE7;P35637;P35637-2	FUS	Isoform of P35637, RNA-binding protein FUS;RNA-binding protein FUS;Isoform of P35637, Isoform Short of RNA-binding protein FUS	28237.1	29468.7	39500.3	30985.4	38559.3	34449	20211	21249.1	38892.6	31375	26240.4	34446.5	40685.2	46607	34617.9	32698.2
C9JAX1;Q16595	FXN	Isoform of Q16595, Frataxin, mitochondrial;Frataxin, mitochondrial	42630.5	43410.1	59858.1	48084.9	35512.8	61760.2	21287.1	43487	63522.4	59028.7	37324.9	63333.1	48912.6	80785.6	36017.7	58325.3
B4DXZ6;P51114	FXR1	Isoform of P51114, Fragile X mental retardation syndrome-related protein 1;Fragile X mental retardation syndrome-related protein 1	34566.1	29584.3	44330.5	38052.6	51230	35274	28223.9	35440.7	40071.1	41857.5	34980.9	38372.2	46859.6	50861.2	39374.7	46375.8
P51116	FXR2	Fragile X mental retardation syndrome-related protein 2	NaN	NaN	NaN	NaN	5091.75	NaN	NaN	NaN	NaN	NaN	25920.4	33413.7	5105.41	NaN	41639.1	NaN
K7EQG4;O00168	FXYD1	Isoform of O00168, FXYD domain-containing ion transport regulator (Fragment);Phospholemman	625908	757532	797569	519828	667724	958879	569241	600288	726408	594128	457515	545359	772077	1.31792e+06	597676	642490
Q9BQS8;Q9BQS8-4	FYCO1	FYVE and coiled-coil domain-containing protein 1;Isoform of Q9BQS8, Isoform 4 of FYVE and coiled-coil domain-containing protein 1	15533.6	14207.6	21422.5	15620.3	20717.3	18790.2	11407.1	16403.9	13743.7	14013.7	12917.5	15532.2	16109.3	13402.9	9252.15	19092.2
P27469	G0S2	G0/G1 switch protein 2	25546.6	10455.7	15561.3	NaN	11556.4	12699.7	7672.45	6372.04	27232.9	19990.7	27047	22851	17622.9	11709.1	14023.1	15951.7
Q13283	G3BP1	Ras GTPase-activating protein-binding protein 1	33696.5	30447.3	39464	32233.4	36338.2	33636.9	23065.4	29547.5	36224.1	16201	25812.8	30535.6	42860.7	48499.1	30218.1	28017.3
Q9UN86	G3BP2	Ras GTPase-activating protein-binding protein 2	10649.5	5875.97	15028.7	15437	16979.5	15608.2	10739.8	11641.6	8891.18	15831.7	7504.13	17383	15363.7	8552.65	12664.2	14986.8
E7EM57;E7EUI8;P11413;P11413-2;P11413-3	G6PD	Isoform of P11413, Glucose-6-phosphate 1-dehydrogenase (Fragment);Isoform of P11413, Glucose-6-phosphate 1-dehydrogenase (Fragment);Glucose-6-phosphate 1-dehydrogenase;Isoform of P11413, Isoform Long of Glucose-6-phosphate 1-dehydrogenase;Isoform of P11413, Isoform 3 of Glucose-6-phosphate 1-dehydrogenase	14253.3	8184.05	NaN	3809.65	NaN	13512.2	10420.9	6931.83	11460.5	NaN	7366.29	NaN	2686.82	NaN	5714.51	NaN
P10253	GAA	Lysosomal alpha-glucosidase	6553.58	8481.71	28093.2	5763.47	24640.2	10657.9	9830.6	12458.8	9354.3	19471.3	8823.12	19772.2	18620.6	14138.5	6746.88	6883.41
P60520	GABARAPL2	Gamma-aminobutyric acid receptor-associated protein-like 2	19007.3	25486.4	26149.3	22690.1	22593.4	26493.7	20921.6	14427.6	18081.3	22474.6	22783.4	18648.2	20687.9	20642.6	18484.3	16620.7
Q8TAE8	GADD45GIP1	Growth arrest and DNA damage-inducible proteins-interacting protein 1	15421.4	8721.21	11184.4	10475	11333.2	9327.84	8075.79	10584.2	23921.9	14629.1	15541.6	NaN	22316.5	21516.7	NaN	16399.9
P51570;P51570-2	GALK1	Galactokinase;Isoform of P51570, Isoform 2 of Galactokinase	18541.7	28410.2	13211.6	37764.1	22979.6	16282.4	157890	36374.6	35621.6	35951.1	NaN	50172.8	31516.5	15303.3	15805.6	117836
Q96C23	GALM	Aldose 1-epimerase	43184.6	40641	83758.8	46691.4	57437.4	54864.8	69316.7	42562.2	44881.4	29605.9	34625.9	52140.1	46879.1	30103.5	50008	43015.1
F2Z2X9;G3V223;G3V3U5;G3V4G9;P07902	GALT;GALT;GALT;;GALT	Isoform of P07902, Galactose-1-phosphate uridylyltransferase;Isoform of P07902, Galactose-1-phosphate uridylyltransferase;Isoform of P07902, Galactose-1-phosphate uridylyltransferase;Uncharacterized protein (Fragment);Galactose-1-phosphate uridylyltransferase	NaN	3446.41	5627.25	NaN	NaN	NaN	989.046	2247.49	NaN	3907.39	NaN	5330.3	6857.98	NaN	4019.03	4357.58
Q14353	GAMT	Guanidinoacetate N-methyltransferase	524722	510234	337380	311969	389534	410419	364023	371898	367600	410414	377805	208684	335040	246972	294522	295631
Q14697;Q14697-2	GANAB	Neutral alpha-glucosidase AB;Isoform of Q14697, Isoform 2 of Neutral alpha-glucosidase AB	45551	40422.4	42508.8	38811.3	50232	45986.3	34151	33868.4	49222.6	38530.5	37773.9	38669.2	41412.1	44291.2	38769.7	39657.5
P04406	GAPDH	Glyceraldehyde-3-phosphate dehydrogenase	60602904	46260452	69475728	70126776	76944008	57434784	57700548	50526508	71949024	61545660	43317588	71596280	80348288	47524588	49122608	71698904
P41250	GARS	Glycine--tRNA ligase	31060.1	37567.6	39316.1	32119.8	40486.7	41213	35183	31617.8	39244.7	36661.6	32740.6	36230	40892.2	38058.6	35152.2	37944.8
P22102	GART	Trifunctional purine biosynthetic protein adenosine-3	21164.2	8437.09	34864.5	14989.4	11173.3	12266.3	10651.3	22973.2	25797.9	26563	12608.3	12412.4	12170.4	33668.8	36295.2	12376
A0A0U1RR30;A0A0U1RRM1;Q86YP4;Q86YP4-2;Q86YP4-3;Q8WXI9	GATAD2B;GATAD2B;GATAD2A;GATAD2A;GATAD2A;GATAD2B	Isoform of Q8WXI9, Transcriptional repressor p66-beta (Fragment);Isoform of Q8WXI9, Transcriptional repressor p66-beta;Transcriptional repressor p66-alpha;Isoform of Q86YP4, Isoform 2 of Transcriptional repressor p66-alpha;Isoform of Q86YP4, Isoform 3 of Transcriptional repressor p66-alpha;Transcriptional repressor p66-beta	NaN	101713	83016.2	34737.5	43432.3	98437.5	29725.1	25529.6	36322.5	34694.6	12660.4	50175.6	58696.2	111331	41877.5	36587.7
H0YE25;H0YER3;H0YF25;Q8NB37;Q8NB37-2;Q8NB37-3	GATD1	Isoform of Q8NB37, Glutamine amidotransferase-like class 1 domain-containing protein 1 (Fragment);Isoform of Q8NB37, Glutamine amidotransferase-like class 1 domain-containing protein 1 (Fragment);Isoform of Q8NB37, Glutamine amidotransferase-like class 1 domain-containing protein 1 (Fragment);Glutamine amidotransferase-like class 1 domain-containing protein 1;Isoform of Q8NB37, Isoform 2 of Gluta…	NaN	NaN	NaN	NaN	NaN	NaN	NaN	NaN	NaN	NaN	NaN	NaN	6005.6	6327.46	5835.07	6110.63
Q04446	GBE1	1,4-alpha-glucan-branching enzyme	95414.8	82773	102668	85160.4	97042.1	147323	96319	84326.2	113098	99365.8	84409.6	93023	143883	143037	113842	130505
P32455	GBP1	Guanylate-binding protein 1	17105.8	16001.9	183714	21494.7	297045	93523.4	190513	13075.4	14277	192613	13747.4	15727.6	150317	84484.1	23074.6	104749
P32456	GBP2	Guanylate-binding protein 2	NaN	NaN	8212.01	NaN	9039.73	6168.07	NaN	NaN	NaN	6052.09	7956.15	9867.46	NaN	NaN	NaN	NaN
D6RF35;P02774;P02774-3	GC	Isoform of P02774, Vitamin D-binding protein;Vitamin D-binding protein;Isoform of P02774, Isoform 3 of Vitamin D-binding protein	112044	128046	121574	110503	146105	122143	79939.2	79766.3	97379.4	103560	52439.3	115163	104616	139838	117552	123867
Q92947	GCDH	Glutaryl-CoA dehydrogenase, mitochondrial	NaN	19434.2	26360.9	13018.4	12689.9	14847.2	15534.3	15616	13641.3	12658.7	17108.2	18181.2	15642.1	24624.7	13691.9	10982.6
P16383;P16383-2;P16383-3;P16383-4	GCFC2	GC-rich sequence DNA-binding factor 2;Isoform of P16383, Isoform 2 of GC-rich sequence DNA-binding factor 2;Isoform of P16383, Isoform 3 of GC-rich sequence DNA-binding factor 2;Isoform of P16383, Isoform 4 of GC-rich sequence DNA-binding factor 2	NaN	NaN	11873.2	NaN	1110.85	NaN	NaN	NaN	NaN	14709.3	NaN	17222.2	10880.2	NaN	3872.13	NaN
P48506	GCLC	Glutamate--cysteine ligase catalytic subunit	33268.3	18592.7	46097	14078	41954.1	15272.4	11833.5	17507.9	14319.4	51197.5	11482	43218.4	30334.1	8036.23	18811.7	213937
P48507;P48507-2	GCLM	Glutamate--cysteine ligase regulatory subunit;Isoform of P48507, Isoform 2 of Glutamate--cysteine ligase regulatory subunit	18287.1	18030.2	15917.9	17606.3	29780.4	NaN	16445.7	17053	NaN	29395.3	NaN	16133.1	7820.5	21324.6	21990.4	33507.1
Q92616	GCN1	eIF-2-alpha kinase activator GCN1	NaN	NaN	NaN	NaN	2137.22	11334.6	NaN	1884.31	NaN	4924.44	1919.92	844.594	2212.43	NaN	6263.66	NaN
P23434	GCSH	Glycine cleavage system H protein, mitochondrial	94829.2	154615	129374	116472	76210.7	109924	145649	96674.9	164675	98552.9	62929.1	106251	83279.6	132456	98971.1	72880.3
Q9NZC3	GDE1	Glycerophosphodiester phosphodiesterase 1	15985.1	13467.5	NaN	24569.4	18952.3	11097.1	10165.1	NaN	13859.7	10869.3	8635.07	NaN	11450.1	7917.49	6306.91	9358.09
P31150	GDI1	Rab GDP dissociation inhibitor alpha	118239	130232	115282	91801.5	112694	142931	118664	104992	101163	92183.5	79736.8	62071.6	79496.5	78855.1	75023.3	77276.4
P50395	GDI2	Rab GDP dissociation inhibitor beta	125172	151214	145519	135314	171346	156537	124711	124539	110332	113476	103469	129653	144552	119364	130790	126195
C9JHN8;C9JPA8;C9JY46;Q7L5D6;Q7L5D6-2	GET4	Isoform of Q7L5D6, Golgi to ER traffic protein 4 homolog (Fragment);Isoform of Q7L5D6, Golgi to ER traffic protein 4 homolog (Fragment);Isoform of Q7L5D6, Golgi to ER traffic protein 4 homolog (Fragment);Golgi to ER traffic protein 4 homolog;Isoform of Q7L5D6, Isoform 2 of Golgi to ER traffic protein 4 homolog	NaN	NaN	NaN	NaN	NaN	NaN	NaN	NaN	18681	NaN	NaN	NaN	NaN	NaN	NaN	NaN
P55789	GFER	FAD-linked sulfhydryl oxidase ALR	28337.3	11896.9	33146.5	37694.1	48791.8	32769.7	7440.18	5864.91	27724.5	7596.94	5900.43	13974.2	6969.47	16047.3	7283.05	7558.84
Q96RP9	GFM1	Elongation factor G, mitochondrial	34075.2	33415.2	42389.7	27531.3	34929.4	35950.3	23685.9	36420.2	43884.4	38615.7	34170.5	56121.4	47010.6	19138.1	24779.5	50055.2
Q969S9;Q969S9-2;Q969S9-3;Q969S9-4;Q969S9-5	GFM2	Ribosome-releasing factor 2, mitochondrial;Isoform of Q969S9, Isoform 2 of Ribosome-releasing factor 2, mitochondrial;Isoform of Q969S9, Isoform 3 of Ribosome-releasing factor 2, mitochondrial;Isoform of Q969S9, Isoform 4 of Ribosome-releasing factor 2, mitochondrial;Isoform of Q969S9, Isoform 5 of Ribosome-releasing factor 2, mitochondrial	NaN	NaN	NaN	NaN	NaN	NaN	1010.51	NaN	1009.24	875.668	452.53	793.371	NaN	NaN	NaN	716.478
B0QYR6;Q9UJY5;Q9UJY5-2;Q9UJY5-3;Q9UJY5-4;Q9UJY5-6	GGA1	Isoform of Q9UJY5, ADP-ribosylation factor-binding protein GGA1 (Fragment);ADP-ribosylation factor-binding protein GGA1;Isoform of Q9UJY5, Isoform 2 of ADP-ribosylation factor-binding protein GGA1;Isoform of Q9UJY5, Isoform 3 of ADP-ribosylation factor-binding protein GGA1;Isoform of Q9UJY5, Isoform 4 of ADP-ribosylation factor-binding protein GGA1;Isoform of Q9UJY5, Isoform 6 of ADP-ribosylation…	7863.16	NaN	55612.5	49519.8	93558.8	108287	NaN	21605.1	NaN	NaN	5382.1	7197.92	140056	174482	7021.44	67337.1
Q9BVM4	GGACT	Gamma-glutamylaminecyclotransferase	20925.3	20436.1	19786.3	15740.6	23697.1	17751.1	19469.4	17916.1	15171.4	9201.3	17283.8	18418.4	25436.4	20284	30784.1	24594.9
O75223	GGCT	Gamma-glutamylcyclotransferase	93468	74157.6	73481.3	81916.9	80762.8	48988.1	48198.4	52251.1	63311.2	60809.4	41731.8	74349.2	53146.8	51017.3	41630.9	54136.7
C9J6G3;C9J7M1;O95749;O95749-2	GGPS1	Isoform of O95749, Geranylgeranyl pyrophosphate synthase (Fragment);Isoform of O95749, Geranylgeranyl pyrophosphate synthase (Fragment);Geranylgeranyl pyrophosphate synthase;Isoform of O95749, Isoform 2 of Geranylgeranyl pyrophosphate synthase	4025.71	2027.21	2874.44	3309.16	3529.6	6285.42	5941.82	7215.44	NaN	4048.36	5346.25	NaN	3168.21	NaN	5659.45	4843.81
P36269;P36269-2;P36269-3	GGT5	Glutathione hydrolase 5 proenzyme;Isoform of P36269, Isoform 2 of Glutathione hydrolase 5 proenzyme;Isoform of P36269, Isoform 3 of Glutathione hydrolase 5 proenzyme	3495.25	NaN	9130.07	NaN	NaN	8995.24	NaN	NaN	9239.15	755.508	NaN	7654.4	9810.42	9945.61	NaN	9289.75
Q9H3K2	GHITM	Growth hormone-inducible transmembrane protein	25938.8	21331.1	12192.9	20499.7	13339.2	18431.8	12883.8	14364.4	30452.6	27556.7	17693.6	26287.9	21553	21054.7	20718.6	19651.8
I1E4Y6;Q6Y7W6;Q6Y7W6-3;Q6Y7W6-4;Q6Y7W6-5	GIGYF2	Isoform of Q6Y7W6, GRB10-interacting GYF protein 2;GRB10-interacting GYF protein 2;Isoform of Q6Y7W6, Isoform 2 of GRB10-interacting GYF protein 2;Isoform of Q6Y7W6, Isoform 3 of GRB10-interacting GYF protein 2;Isoform of Q6Y7W6, Isoform 4 of GRB10-interacting GYF protein 2	54140.4	NaN	3742.38	NaN	4066.22	NaN	2730.7	863.82	1609.08	3537.63	NaN	1978.83	1691.03	3110.78	1686.98	3130.77
G5E9W9;Q9NUV9	GIMAP4	Isoform of Q9NUV9, GTPase IMAP family member 4;GTPase IMAP family member 4	1251.6	6633.35	NaN	NaN	NaN	873.411	NaN	1589.99	3046.92	1529.34	1955.7	1835.95	2115.73	3507.83	2907.32	3138.03
O14908	GIPC1	PDZ domain-containing protein GIPC1	NaN	23151.1	17395.7	8257.97	19951	3739.6	NaN	NaN	NaN	14517.8	3126.32	19657.2	14046.1	4325.13	9968.33	13514.8
Q92896;Q92896-2;Q92896-3	GLG1	Golgi apparatus protein 1;Isoform of Q92896, Isoform 2 of Golgi apparatus protein 1;Isoform of Q92896, Isoform 3 of Golgi apparatus protein 1	NaN	19443.1	NaN	4596.9	NaN	NaN	NaN	28715.4	NaN	NaN	NaN	NaN	NaN	NaN	3120.1	3190.19
Q9H4G4	GLIPR2	Golgi-associated plant pathogenesis-related protein 1	17073.4	17674.4	13807.5	14663.6	16656.2	16514.7	15485.2	13476.5	17147.3	10389.5	11929.6	13323	16791.6	24932.4	17844.6	12401.9
Q04760	GLO1	Lactoylglutathione lyase	820051	933467	873750	737922	776855	1042160	944569	672521	787941	616806	695814	604829	669253	1035550	764107	578596
F6TLX2;Q9HC38-2	GLOD4	Isoform of Q9HC38, Glyoxalase domain-containing protein 4;Isoform of Q9HC38, Isoform 2 of Glyoxalase domain-containing protein 4	146310	152135	166750	133741	140301	186557	115443	112397	164036	110411	116262	139815	121464	162553	133700	118265
P35754	GLRX	Glutaredoxin-1	249303	254255	157515	243171	189026	220987	163410	146254	205309	188686	159622	207242	170183	325493	267291	136427
O76003	GLRX3	Glutaredoxin-3	45608.8	55394	39094.6	39591.2	43350.6	54402.8	45849.2	42244.8	62888.2	40356.1	40102.4	51815.4	49579.8	40076	48950.2	44584.1
Q86SX6	GLRX5	Glutaredoxin-related protein 5, mitochondrial	338470	316196	358397	234711	258174	308075	292955	292026	457180	351264	307680	383969	326684	349730	254351	175288
F5GZ49;F5H0U5;Q9NZD2	GLTP	Isoform of Q9NZD2, Glycolipid transfer protein;Isoform of Q9NZD2, Glycolipid transfer protein;Glycolipid transfer protein	NaN	NaN	5559.83	3978.73	5376.35	6172.43	4659.55	4511.91	4535	6760.72	4663.69	7298.15	5311.17	5368.9	5661.98	6821.7
P00367	GLUD1	Glutamate dehydrogenase 1, mitochondrial	128546	101309	115722	87009	93500.7	134350	99213	113759	167117	115220	109262	141890	113195	112837	107297	131601
P15104	GLUL	Glutamine synthetase	NaN	3410.39	NaN	NaN	NaN	22146	NaN	18639.6	NaN	20734.6	NaN	15341.3	NaN	13769.8	16618.8	26373.1
G3V4P8;P60983	GMFB	Isoform of P60983, Glia maturation factor beta (Fragment);Glia maturation factor beta	23819.7	9203.35	5728.68	33271.9	5593.16	23012.2	19879.1	20778.2	21367.4	7890.38	16194.3	32783.2	23138.2	29372.7	12487.7	19799.2
Q96IJ6;Q96IJ6-2	GMPPA	Mannose-1-phosphate guanyltransferase alpha;Isoform of Q96IJ6, Isoform 2 of Mannose-1-phosphate guanyltransferase alpha	3471.36	NaN	4591.04	5897.26	8271.63	4303.89	6458.52	4513.25	6377.78	5355.11	NaN	8891.08	6173.68	5272.43	6793.38	3952.69
Q9Y5P6;Q9Y5P6-2	GMPPB	Mannose-1-phosphate guanyltransferase beta;Isoform of Q9Y5P6, Isoform 2 of Mannose-1-phosphate guanyltransferase beta	14017.6	14469.1	15783.4	20278.8	19625.1	16348.5	13617.6	16147.5	16458.9	15600	12976.5	15879.2	15967.3	11772.1	13902.4	14887.8
P36959	GMPR	GMP reductase 1	31441.4	9723.3	23554.2	24882.1	29864.2	30092.8	36238.1	18527.1	27495.6	19971.2	19104.4	15718.1	27741.3	15021.1	13712.3	22728.9
A0A087WWM4;F8WAN9;H0YLV5;H0YMB3;H0YNJ6;Q9P2T1;Q9P2T1-2;Q9P2T1-3	GMPR2	Isoform of Q9P2T1, GMP reductase;Isoform of Q9P2T1, GMP reductase;Isoform of Q9P2T1, GMP reductase;Isoform of Q9P2T1, GMP reductase;Isoform of Q9P2T1, GMP reductase;GMP reductase 2;Isoform of Q9P2T1, Isoform 2 of GMP reductase 2;Isoform of Q9P2T1, Isoform 3 of GMP reductase 2	28135.6	NaN	17368.5	15414.3	7294.2	NaN	52581	10036	55647.7	16996.3	7257.07	16909.2	6167.39	7578.99	15251.8	24159.2
P49915;P49915-2	GMPS	GMP synthase [glutamine-hydrolyzing];Isoform of P49915, Isoform 2 of GMP synthase [glutamine-hydrolyzing]	NaN	2369.33	3949.38	11576.1	14520.9	26946.3	3837.17	NaN	19624.8	10436.5	3556.79	6639.11	10010.9	2434.19	2938.59	13501.7
P29992	GNA11	Guanine nucleotide-binding protein subunit alpha-11	NaN	NaN	8712.98	18074.2	52719.4	8448.67	9652.16	6887.66	12065.8	12860.3	7072.97	7890.57	NaN	NaN	10380.1	7097.18
Q14344;Q14344-2	GNA13	Guanine nucleotide-binding protein subunit alpha-13;Isoform of Q14344, Isoform 2 of Guanine nucleotide-binding protein subunit alpha-13	10672.3	NaN	NaN	NaN	NaN	NaN	NaN	1613.38	2194.95	NaN	3521.01	NaN	NaN	NaN	2417.83	2794.98
P04899;P04899-4	GNAI2	Guanine nucleotide-binding protein G(i) subunit alpha-2;Isoform of P04899, Isoform sGi2 of Guanine nucleotide-binding protein G(i) subunit alpha-2	38895.4	35164.1	35118.9	15515.9	36216.5	41665.8	27338.8	31598.8	47631.1	28662	22743.7	23520.1	32692.3	39865.5	23646	27843.8
P63092;P63092-2;P63092-3;P63092-4;Q5JWF2;Q5JWF2-2	GNAS	Isoform of Q5JWF2, Guanine nucleotide-binding protein G(s) subunit alpha isoforms short;Isoform of Q5JWF2, Isoform Gnas-2 of Guanine nucleotide-binding protein G(s) subunit alpha isoforms short;Isoform of Q5JWF2, Isoform 3 of Guanine nucleotide-binding protein G(s) subunit alpha isoforms short;Isoform of Q5JWF2, Isoform 4 of Guanine nucleotide-binding protein G(s) subunit alpha isoforms short;Gua…	33361.5	29891.3	35840.9	27502	32905.4	33077.1	28774.3	29053.3	31950.7	27186.1	24655.8	24330.7	22758.9	23308.1	31049.1	25043.7
P62873;P62873-2	GNB1	Guanine nucleotide-binding protein G(I)/G(S)/G(T) subunit beta-1;Isoform of P62873, Isoform 2 of Guanine nucleotide-binding protein G(I)/G(S)/G(T) subunit beta-1	73570.8	36117.9	53193.1	46022.3	54708.8	77813.3	38709.8	31284.5	54827.8	35027.2	45473.8	44015.4	44327	30486.3	51145.3	47760
P62879	GNB2	Guanine nucleotide-binding protein G(I)/G(S)/G(T) subunit beta-2	70453.7	184739	35428.9	66882.4	64451.6	46028.2	34962.1	35156.1	65852.8	43720	30957.1	19767.8	36506.3	41148.6	54355.7	35030.4
P61952	GNG11	Guanine nucleotide-binding protein G(I)/G(S)/G(O) subunit gamma-11	19830	17310	20062.9	NaN	15669.8	22744.9	12894.8	16446.9	17333.6	12882.5	11827.4	18759.1	11987.6	38880.9	17229	15389.9
Q9UBI6	GNG12	Guanine nucleotide-binding protein G(I)/G(S)/G(O) subunit gamma-12	220652	134964	166605	131373	160220	212438	199513	149896	118512	197924	102544	66926	157089	193954	84192.6	90334.7
G3V2N0;G3V3J9;P59768	GNG2	Isoform of P59768, Guanine nucleotide-binding protein subunit gamma;Isoform of P59768, Guanine nucleotide-binding protein subunit gamma;Guanine nucleotide-binding protein G(I)/G(S)/G(O) subunit gamma-2	NaN	NaN	NaN	30388.6	38065.9	NaN	NaN	NaN	40302.7	25794.2	NaN	33851	31280.2	47038.5	30129.7	28773.5
P63218	GNG5	Guanine nucleotide-binding protein G(I)/G(S)/G(O) subunit gamma-5	NaN	NaN	NaN	NaN	NaN	NaN	NaN	NaN	NaN	NaN	39689.8	NaN	NaN	13853.5	39302.8	NaN
O60262	GNG7	Guanine nucleotide-binding protein G(I)/G(S)/G(O) subunit gamma-7	NaN	110280	NaN	NaN	NaN	101305	67072.5	NaN	NaN	NaN	NaN	NaN	NaN	179193	83096.1	NaN
O15228;O15228-2;Q5TBH6;Q5TBH8	GNPAT	Dihydroxyacetone phosphate acyltransferase;Isoform of O15228, Isoform 2 of Dihydroxyacetone phosphate acyltransferase;Isoform of O15228, Dihydroxyacetone phosphate acyltransferase (Fragment);Isoform of O15228, Dihydroxyacetone phosphate acyltransferase (Fragment)	72492.8	143342	112175	144417	145881	110975	86603.2	104091	100524	149013	116059	182092	244456	143078	127861	255196
P46926	GNPDA1	Glucosamine-6-phosphate isomerase 1	51652.6	22052.6	44324.7	44087	53018	17619.2	20669.1	50541.8	58309.8	39792.4	40239.5	39402.3	46879.9	13798.2	39208.9	32124.2
Q8TDQ7;Q8TDQ7-3	GNPDA2	Glucosamine-6-phosphate isomerase 2;Isoform of Q8TDQ7, Isoform 3 of Glucosamine-6-phosphate isomerase 2	NaN	14358.6	7136.82	NaN	8152.98	NaN	NaN	NaN	NaN	5093.46	NaN	NaN	NaN	NaN	NaN	NaN
P15586	GNS	N-acetylglucosamine-6-sulfatase	7172.32	6966.32	8252.87	10004.9	9093.62	4394.86	3369.22	NaN	6580.73	10149	NaN	12597.6	12052.2	15801.9	9849.53	2022.54
Q08379;Q08379-2	GOLGA2	Golgin subfamily A member 2;Isoform of Q08379, Isoform 2 of Golgin subfamily A member 2	NaN	NaN	2593.24	2510.52	3565.83	932.209	1236.01	1341.31	3239.32	2263.43	1458.28	2075.89	2588.21	3156.07	2585.58	2231.21
Q08378	GOLGA3	Golgin subfamily A member 3	3107.15	NaN	NaN	NaN	NaN	4905.21	643.491	NaN	2420.02	1707.32	NaN	NaN	2951.37	4196.38	3298.15	1030.58
H0Y6I0;Q13439;Q13439-3;Q13439-4;Q13439-5	GOLGA4	Isoform of Q13439, Golgin subfamily A member 4 (Fragment);Golgin subfamily A member 4;Isoform of Q13439, Isoform 3 of Golgin subfamily A member 4;Isoform of Q13439, Isoform 4 of Golgin subfamily A member 4;Isoform of Q13439, Isoform 5 of Golgin subfamily A member 4	1.09526e+06	2483485	96875.6	1236694	569569	2.56728e+06	1.78308e+06	1.42836e+06	705820	578504	1191759	388953	631389	1.38422e+06	1.05564e+06	1.99242e+06
F8W785;O00461	GOLIM4	Isoform of O00461, Golgi integral membrane protein 4;Golgi integral membrane protein 4	2296.08	NaN	NaN	NaN	NaN	3888.83	NaN	NaN	2943.03	NaN	1423.79	2503.6	3591.41	5216.82	2948.81	2411.78
Q5T5I6;Q9H4A5;Q9H4A5-2	GOLPH3L	Isoform of Q9H4A5, Golgi phosphoprotein 3-like (Fragment);Golgi phosphoprotein 3-like;Isoform of Q9H4A5, Isoform 2 of Golgi phosphoprotein 3-like	NaN	NaN	NaN	NaN	NaN	NaN	25333.6	NaN	NaN	NaN	NaN	NaN	NaN	2541.08	37420.6	29872.4
F5H6U7;G3V1U5;Q9Y3E0	GOLT1B	Isoform of Q9Y3E0, Vesicle transport protein GOT1B;Isoform of Q9Y3E0, Golgi transport 1 homolog B (S. cerevisiae), isoform CRA_c;Vesicle transport protein GOT1B	9912.47	6828.84	10613.7	11654	10584	7790.14	8533.98	9258.38	8553.26	8491.52	8753.72	NaN	6318.48	10114.9	9844.89	8885.2
Q9BXV9	GON7	EKC/KEOPS complex subunit GON7	37838.8	42217.5	29463.4	19644.4	20919.9	21466.3	32874.9	10380.2	44226.8	37429.9	25911.1	31954.2	43367.4	60456	31227.7	31616.1
Q9H8Y8;Q9H8Y8-2;Q9H8Y8-3	GORASP2	Golgi reassembly-stacking protein 2;Isoform of Q9H8Y8, Isoform 2 of Golgi reassembly-stacking protein 2;Isoform of Q9H8Y8, Isoform 3 of Golgi reassembly-stacking protein 2	66983.2	4255.53	33671.9	3478.13	41147.4	65621.2	55403.5	NaN	74022.2	49356.1	50823.5	NaN	71035.6	70550	61789.2	69135.9
A0A1W2PNV3;A0A1W2PPG1;A0A1W2PPG5;A0A1W2PPP5;A0A1W2PPW8;A0A1W2PQ38;A0A1W2PQ77;A0A1W2PQE0;A0A1W2PQM3;A0A1W2PQP2;A0A1W2PR02;A0A1W2PR23;A0A1W2PRC2;A0A1W2PRL0;A0A1W2PRP7;A0A1W2PS12;A0A1W2PS81;E7EQ34;I3L4Z6;I3NI02;O14653;O14653-2	GOSR2;GOSR2;GOSR2;GOSR2;GOSR2;GOSR2;GOSR2;GOSR2;GOSR2;GOSR2;GOSR2;GOSR2;GOSR2;GOSR2;GOSR2;GOSR2;GOSR2;;GOSR2;GOSR2;GOSR2;GOSR2	Isoform of O14653, Golgi SNAP receptor complex member 2 (Fragment);Isoform of O14653, Golgi SNAP receptor complex member 2;Isoform of O14653, Golgi SNAP receptor complex member 2;Isoform of O14653, Golgi SNAP receptor complex member 2;Isoform of O14653, Golgi SNAP receptor complex member 2;Isoform of O14653, Golgi SNAP receptor complex member 2 (Fragment);Isoform of O14653, Golgi SNAP receptor co…	NaN	NaN	NaN	NaN	982.556	NaN	NaN	NaN	NaN	NaN	NaN	1179.81	NaN	NaN	NaN	107478
P17174	GOT1	Aspartate aminotransferase, cytoplasmic	3.00917e+06	3.50882e+06	2.74977e+06	2.05218e+06	2559917	3.24048e+06	2272747	2.71522e+06	3530998	3.16205e+06	1.76864e+06	2.61485e+06	2.58501e+06	2341663	1.88105e+06	2.50166e+06
P00505	GOT2	Aspartate aminotransferase, mitochondrial	3.12038e+06	3.02741e+06	3.31497e+06	2.50062e+06	1.80532e+06	3.7832e+06	1.78802e+06	3.18223e+06	4.74563e+06	3.12571e+06	3.07245e+06	4.01739e+06	2.84191e+06	2.56699e+06	2.47449e+06	4489077
H7C410;P35052	GPC1	Isoform of P35052, Glypican-1;Glypican-1	15857.5	18683.3	10684.2	13520.8	13505.9	16931	9731.3	11130.9	13990.2	10464.6	9436.03	5145.41	18971.2	38317.5	13939.2	23934.1
P21695;P21695-2	GPD1	Glycerol-3-phosphate dehydrogenase [NAD(+)], cytoplasmic;Isoform of P21695, Isoform 2 of Glycerol-3-phosphate dehydrogenase [NAD(+)], cytoplasmic	1147481	878381	1.03317e+06	1.28702e+06	1.55679e+06	1.00018e+06	1.35447e+06	1.46574e+06	1.28832e+06	1.04495e+06	991877	1.35004e+06	1.697e+06	780131	1.35647e+06	1.85297e+06
Q8N335	GPD1L	Glycerol-3-phosphate dehydrogenase 1-like protein	279494	246360	270398	154841	248770	271408	261674	410111	273966	244245	227817	235351	253886	214814	268962	373485
P43304	GPD2	Glycerol-3-phosphate dehydrogenase, mitochondrial	56674.5	48779.7	53668.9	59792.1	49705.3	52099	44434.5	61098.4	58370.1	52183.9	52328.4	66940.8	56910.2	34605.7	51887.2	64295.8
F5H039;Q9NQX3;Q9NQX3-2	GPHN	Isoform of Q9NQX3, Gephyrin;Gephyrin;Isoform of Q9NQX3, Isoform 2 of Gephyrin	18013.6	22227.2	19782.8	18129.7	20448.4	21010.9	18145.6	16638	15755.8	17377.5	14945.4	16214.9	19390.1	20130.4	23280.8	18999.9
A0A0A0MTS2;P06744	GPI	Isoform of P06744, Glucose-6-phosphate isomerase (Fragment);Glucose-6-phosphate isomerase	1.98617e+06	2.15096e+06	1.66138e+06	1.56221e+06	1.92506e+06	1.35158e+06	1368667	1.64434e+06	2.36863e+06	2.04991e+06	1.35396e+06	1.70132e+06	1.80173e+06	965361	1.38987e+06	1.48317e+06
Q92917	GPKOW	G-patch domain and KOW motifs-containing protein	NaN	NaN	NaN	NaN	NaN	NaN	NaN	NaN	4044.75	2775.84	29701	NaN	NaN	NaN	NaN	3308.54
P80108	GPLD1	Phosphatidylinositol-glycan-specific phospholipase D	19867	NaN	NaN	NaN	NaN	NaN	NaN	NaN	NaN	NaN	NaN	NaN	NaN	NaN	18072.1	NaN
Q9HCN4;Q9HCN4-5	GPN1	GPN-loop GTPase 1;Isoform of Q9HCN4, Isoform 5 of GPN-loop GTPase 1	3988.97	26941.2	4943.31	2795.39	5050.34	4785.52	3127.2	4113.29	5207.25	3854.18	3052.08	4931.33	3750.71	28542.2	3933.38	4381.85
G5E994;Q5VW38;Q5VW38-2;Q5VW38-3;U3KQD2	GPR107	Isoform of Q5VW38, G protein-coupled receptor 107, isoform CRA_c;Protein GPR107;Isoform of Q5VW38, Isoform 2 of Protein GPR107;Isoform of Q5VW38, Isoform 3 of Protein GPR107;Isoform of Q5VW38, Protein GPR107	NaN	NaN	1221.9	NaN	NaN	NaN	NaN	NaN	NaN	NaN	NaN	5436.42	NaN	NaN	NaN	NaN
C9JFE4;Q13098;Q13098-5;Q13098-7	GPS1	Isoform of Q13098, COP9 signalosome complex subunit 1;COP9 signalosome complex subunit 1;Isoform of Q13098, Isoform 4 of COP9 signalosome complex subunit 1;Isoform of Q13098, Isoform 2 of COP9 signalosome complex subunit 1	31631.8	33186.6	46214.9	24294.4	58977.9	49179.1	37882.4	58480.9	55599.1	50129.8	46665.9	39911.8	29846.2	40260.4	33037.2	59407.7
P24298	GPT	Alanine aminotransferase 1	73371.1	125907	72675.3	58314.7	73656.5	115229	100053	102485	95086.2	76886.8	71678.3	79458	82538.9	59189.9	80451	97718.1
Q8TD30	GPT2	Alanine aminotransferase 2	54973.7	78720.3	31317.6	17241.2	34941.9	63035.5	42715.4	46335.1	37190	74673.5	43985.3	81415.1	50371.9	33514.2	37699	55538.4
A0A087WUQ6;P07203	GPX1	Isoform of P07203, Glutathione peroxidase;Glutathione peroxidase 1	120467	166670	136824	133408	124050	113391	123599	122888	147334	135890	121590	127158	132910	103256	146342	155987
A0A087X1J7;P22352	GPX3	Isoform of P22352, Glutathione peroxidase;Glutathione peroxidase 3	54425	61502.4	74780.9	48830.9	69123	79475.9	56143.6	59855.3	52241	49174.3	52215.2	46469.1	43226	58529.6	51251.7	39729.8
A0A087WT12;A0A087X2I2;P36969;P36969-2	GPX4	Isoform of P36969, Glutathione peroxidase;Isoform of P36969, Glutathione peroxidase;Phospholipid hydroperoxide glutathione peroxidase, mitochondrial;Isoform of P36969, Isoform Cytoplasmic of Phospholipid hydroperoxide glutathione peroxidase, mitochondrial	26542.2	27851.9	91212.8	32253.5	103014	29554.8	24736.6	32653.5	27022.3	73534.4	35689.7	74452.4	90715.5	38414.4	57905.7	29815.7
P62993	GRB2	Growth factor receptor-bound protein 2	63202	58623	51113.5	64744.1	52968	59920	67306.3	55215.7	58362.6	45330.2	56441.1	45872.2	70341.7	65361	60674.3	45222.4
Q9UBQ7	GRHPR	Glyoxylate reductase/hydroxypyruvate reductase	146201	147293	144189	152214	143552	164040	157245	165835	217033	187327	186583	205201	206948	197804	174714	201221
Q13255;Q13255-2;Q13255-3	GRM1	Metabotropic glutamate receptor 1;Isoform of Q13255, Isoform Beta of Metabotropic glutamate receptor 1;Isoform of Q13255, Isoform 3 of Metabotropic glutamate receptor 1	NaN	NaN	94026.1	110972	91018	125301	103188	103678	98542.8	107761	82551.5	68197.9	106829	64234.4	77684.6	86631.4
Q9HAV7	GRPEL1	GrpE protein homolog 1, mitochondrial	24316.5	22180.2	17555.3	10461	13754.6	15499	9888.22	22340.3	33690.2	24280.3	25782.3	26832.9	23296.9	36733.5	23309.8	30765.6
F5H5I6;H0Y8R1;H0YAK1;Q12849	GRSF1	Isoform of Q12849, G-rich sequence factor 1;Isoform of Q12849, G-rich sequence factor 1 (Fragment);Isoform of Q12849, G-rich sequence factor 1 (Fragment);G-rich sequence factor 1	27792.9	26537.1	28081.9	32279.8	28034.3	30674.9	26147.8	33948.5	41690.1	48745	34349.4	46611.1	44006	33867.4	32270.8	44695.6
P49840	GSK3A	Glycogen synthase kinase-3 alpha	74093.8	139163	38368.4	3474.26	42155.2	8051.29	35931.9	6015.91	6184.59	42645.7	7804.73	54984.2	9529.23	NaN	269183	13348.9
P49841;P49841-2	GSK3B	Glycogen synthase kinase-3 beta;Isoform of P49841, Isoform 2 of Glycogen synthase kinase-3 beta	9370.15	5962	15921.2	12312	9715.13	NaN	9130.26	11330.2	16059.3	6923.11	5887.41	7506.11	7861.55	12380.9	16269.7	7648.11
A0A0A0MS51	GSN	Isoform of P06396, Gelsolin	397454	425852	432736	348649	412952	372307	347767	351302	384849	412746	363527	343053	399878	489350	694167	476023
P06396	GSN	Gelsolin	79672	63130	16908.7	81622.9	102347	79154.9	62613.5	71774.8	64731.3	52835.1	67721.1	59832.6	55461.4	51952.7	129518	100634
P15170-2;P15170-3	GSPT1	Isoform of P15170, Isoform 2 of Eukaryotic peptide chain release factor GTP-binding subunit ERF3A;Isoform of P15170, Isoform 3 of Eukaryotic peptide chain release factor GTP-binding subunit ERF3A	12339.2	21498.3	21896.1	11241.5	16988.3	8961.09	10432.7	11269.3	13727.6	17541.3	11626.5	17159.8	19852.1	6405.68	13587.5	23619.6
P00390;P00390-2;P00390-3	GSR	Glutathione reductase, mitochondrial;Isoform of P00390, Isoform Cytoplasmic of Glutathione reductase, mitochondrial;Isoform of P00390, Isoform 2 of Glutathione reductase, mitochondrial	45551.8	45906.5	62800.5	62447.9	62431.6	42548.5	30618.9	30358.4	43203.7	47022.6	37746.8	52451.7	59171.3	49734.7	40415.7	43534.6
P48637	GSS	Glutathione synthetase	40265.6	43058.1	45694.7	28223.3	43922.8	53834.9	42364.7	30073.8	38264.3	21044.4	29417.1	34604	19513.2	41117.7	39145.3	35342.3
Q9Y2Q3;Q9Y2Q3-2	GSTK1	Glutathione S-transferase kappa 1;Isoform of Q9Y2Q3, Isoform 2 of Glutathione S-transferase kappa 1	44767.1	33595.2	48289.9	31856.8	30049.6	35531.2	26372.8	26159	40081.8	54249.8	29348.5	32803	49616.2	31630.3	33036.6	48926.3
P09488;P09488-2	GSTM1	Glutathione S-transferase Mu 1;Isoform of P09488, Isoform 2 of Glutathione S-transferase Mu 1	NaN	140898	NaN	NaN	NaN	NaN	147070	NaN	NaN	107843	NaN	299785	NaN	NaN	161654	NaN
P28161	GSTM2	Glutathione S-transferase Mu 2	535927	917520	1.00131e+06	1.02246e+06	972481	753513	951119	639002	545854	1.07561e+06	593251	1.00333e+06	858357	506461	736513	766284
P21266	GSTM3	Glutathione S-transferase Mu 3	76983.5	221612	204351	213072	135792	289718	155077	91175.5	79621.3	237341	145740	162234	93173.3	141701	132686	85456.1
A0A0A0MR85	GSTM4	Isoform of Q03013, Glutathione S-transferase Mu 4	7378.54	22440.9	11690.6	8179.79	8507.28	8774.21	56831	17084.4	8818.08	31141.2	12075.7	5683.55	10574.6	12531.4	50100.3	8955.31
P78417	GSTO1	Glutathione S-transferase omega-1	543654	611260	502737	447955	528069	749105	267628	443236	578949	442601	521558	577305	561245	684184	301927	467741
P09211	GSTP1	Glutathione S-transferase P	833601	936994	971191	811121	901074	915542	1.03758e+06	732631	742398	795136	723773	834769	785797	706218	711252	594108
P30711	GSTT1	Glutathione S-transferase theta-1	48387	NaN	140636	12063.6	64436.7	NaN	49741.3	63143	46576.3	NaN	65293.8	NaN	56845.8	NaN	32633.6	81936.4
A0A087WY67;P0CG29;P0CG30;Q6ICJ4	GSTT2;GSTT2;GSTT2B;Em:AP000351.3	Isoform of P0CG29, Glutathione S-transferase theta-2;Glutathione S-transferase theta-2;Glutathione S-transferase theta-2B;Isoform of P0CG30, Em:AP000351.3 protein	13734.2	84002.8	6366.76	NaN	NaN	1537.8	860.152	8431.46	30037.2	59861	9740.4	NaN	10338.3	NaN	NaN	17608.2
A0A0C4DFM0;G3V4T6;G3V5T0	GSTZ1	Isoform of O43708, Glutathione transferase zeta 1 (Maleylacetoacetate isomerase), isoform CRA_c;Isoform of O43708, Maleylacetoacetate isomerase;Isoform of O43708, Maleylacetoacetate isomerase	49740.9	60198.1	99533.6	62999.8	69843.3	74629.3	74271.1	56743.2	59126.5	73442.4	58836.4	49024.8	54216.5	50877.8	70959.9	64438.2
A4D1E9;A4D1E9-2	GTPBP10	GTP-binding protein 10;Isoform of A4D1E9, Isoform 2 of GTP-binding protein 10	NaN	NaN	645.518	NaN	NaN	NaN	NaN	1624.41	NaN	NaN	NaN	2564.31	NaN	3499.15	NaN	NaN
B7Z685;D6RC99;E9PCN2;Q02153;Q02153-2;Q02153-3	GUCY1B3	Isoform of Q02153, Guanylate cyclase 1, soluble, beta 3, isoform CRA_c;Isoform of Q02153, Guanylate cyclase soluble subunit beta-1;Isoform of Q02153, Guanylate cyclase soluble subunit beta-1;Guanylate cyclase soluble subunit beta-1;Isoform of Q02153, Isoform HSGC-2 of Guanylate cyclase soluble subunit beta-1;Isoform of Q02153, Isoform 3 of Guanylate cyclase soluble subunit beta-1	NaN	NaN	NaN	NaN	NaN	NaN	NaN	NaN	NaN	NaN	NaN	NaN	NaN	NaN	NaN	653.662
B1ANH0;B1ANH2;B1ANH5;B1ANH6;Q16774;Q16774-2	GUK1	Isoform of Q16774, Guanylate kinase (Fragment);Isoform of Q16774, Guanylate kinase (Fragment);Isoform of Q16774, Guanylate kinase;Isoform of Q16774, Guanylate kinase;Guanylate kinase;Isoform of Q16774, Isoform 2 of Guanylate kinase	NaN	NaN	4955.62	5117.13	5051.61	NaN	3357.13	NaN	4986.34	2689.77	3630	5649.4	6653.82	6053.96	NaN	3820.91
B8ZZL1;Q9UBP9;Q9UBP9-2;Q9UBP9-3;Q9UBP9-4	GULP1	Isoform of Q9UBP9, PTB domain-containing engulfment adapter protein 1 (Fragment);PTB domain-containing engulfment adapter protein 1;Isoform of Q9UBP9, Isoform 2 of PTB domain-containing engulfment adapter protein 1;Isoform of Q9UBP9, Isoform 3 of PTB domain-containing engulfment adapter protein 1;Isoform of Q9UBP9, Isoform 4 of PTB domain-containing engulfment adapter protein 1	49744	90131.4	75704.9	62045.4	50800.3	91630.1	36111.2	68426.5	85636.2	65094.9	47293	71381.4	67451	248356	103162	48662.4
P46976-2	GYG1	Isoform of P46976, Isoform GN-1 of Glycogenin-1	150573	126552	138182	173068	136134	147392	133413	166649	218350	181098	196196	172311	217630	236189	212435	260086
A0A087WU29;A0A0C4DFT7;E7EQF3;E9PD10;E9PH25;P02724;P02724-2;P02724-3;Q13030	GYPA;GYPA;GYPA;GYPA;GYPA;GYPA;GYPA;GYPA;GPErik	Isoform of P02724, Glycophorin;Isoform of P02724, Glycophorin;Isoform of P02724, Glycophorin;Isoform of P02724, Glycophorin;Isoform of P02724, Glycophorin-A;Glycophorin-A;Isoform of P02724, Isoform 2 of Glycophorin-A;Isoform of P02724, Isoform 3 of Glycophorin-A;Isoform of P02724, Glycophorin Erik I-IV	150282	111533	NaN	188746	NaN	33068.2	NaN	37930.4	58912.8	NaN	NaN	157306	30888.1	86916	83215.1	NaN
P04921;P04921-2;P04921-3	GYPC	Glycophorin-C;Isoform of P04921, Isoform Glycophorin-D of Glycophorin-C;Isoform of P04921, Isoform 3 of Glycophorin-C	70787.6	83359.7	NaN	39148.3	31137.1	48942.1	24888.7	28503.8	32159.3	24147.9	31902.3	NaN	95924.3	158098	35233.2	26911.2
P13807;P13807-2	GYS1	Glycogen [starch] synthase, muscle;Isoform of P13807, Isoform 2 of Glycogen [starch] synthase, muscle	184746	156050	143767	179088	143585	150674	191837	230236	283639	285001	214140	213834	207812	170559	173144	239087
P07305	H1F0	Histone H1.0	111960	131106	86633	80282.8	72406.7	116231	90693.2	112249	98864.5	116175	107307	111856	141517	206001	186393	127821
Q92522	H1FX	Histone H1x	15941.5	104999	26311.5	21002.4	29098	22682.4	18151.8	19592.5	23272.2	20947.6	19976.4	22135.1	24811.7	28003.1	36992.3	19358.2
O75367;O75367-2;O75367-3	H2AFY	Core histone macro-H2A.1;Isoform of O75367, Isoform 1 of Core histone macro-H2A.1;Isoform of O75367, Isoform 3 of Core histone macro-H2A.1	58609.9	65488.3	56643.2	43483.6	52752.6	60723.6	46264.5	48036.4	59741.6	44227.3	53921.5	54789.2	59752.4	88434.3	70083.7	52026.3
Q9P0M6	H2AFY2	Core histone macro-H2A.2	1081.55	15044	NaN	NaN	NaN	21403.9	1862.72	11732.6	12278.4	3794.89	3117.51	7405.94	17142.2	16343.9	NaN	16146.5
P0C0S5;Q71UI9	H2AFZ;H2AFV	Histone H2A.Z;Histone H2A.V	64373.1	61721.4	29849.6	19299.6	27053.8	NaN	30180.9	47446.6	41935.8	21010.8	59449	29742.9	27251.1	41609.7	74916.5	37356.5
B4DEB1;K7EK07;K7EMV3;K7ES00;P68431;P84243;Q16695;Q71DI3	H3F3A;H3F3B;H3F3B;H3F3B;HIST1H3A;H3F3A;HIST3H3;HIST2H3A	Isoform of P84243, Histone H3;Isoform of P84243, Histone H3 (Fragment);Isoform of P84243, Histone H3;Isoform of P84243, Histone H3.3 (Fragment);Histone H3.1;Histone H3.3;Histone H3.1t;Histone H3.2	659700	623834	558512	441198	620724	623275	511384	576901	712532	560474	653461	434065	668303	802581	869499	713877
O95479;R4GMU1	H6PD	GDH/6PGL endoplasmic bifunctional protein;Isoform of O95479, GDH/6PGL endoplasmic bifunctional protein	13620.3	8864.08	13431.5	14917.8	8816.8	9511.6	12098.1	15559.8	10862.8	8581.15	9564.61	11598.7	9274.8	8967.69	13715.1	16888.9
B0YJ81	HACD1	Very-long-chain (3R)-3-hydroxyacyl-CoA dehydratase 1	NaN	NaN	NaN	11385.9	NaN	NaN	NaN	NaN	NaN	NaN	12116.6	NaN	NaN	NaN	8094.87	NaN
H3BPZ1;H3BS72;Q9P035	HACD3	Isoform of Q9P035, Very-long-chain (3R)-3-hydroxyacyl-CoA dehydratase;Isoform of Q9P035, Very-long-chain (3R)-3-hydroxyacyl-CoA dehydratase;Very-long-chain (3R)-3-hydroxyacyl-CoA dehydratase 3	NaN	NaN	1985.59	1257.69	NaN	NaN	NaN	NaN	NaN	NaN	NaN	2814.93	NaN	2691.08	3518.8	NaN
A0A0A0MSE2;A0A0D9SFP2;E9PF18;Q16836;Q16836-2;Q16836-3	HADH	Isoform of Q16836, Hydroxyacyl-coenzyme A dehydrogenase, mitochondrial;Isoform of Q16836, Hydroxyacyl-coenzyme A dehydrogenase, mitochondrial;Isoform of Q16836, Hydroxyacyl-coenzyme A dehydrogenase, mitochondrial;Hydroxyacyl-coenzyme A dehydrogenase, mitochondrial;Isoform of Q16836, Isoform 2 of Hydroxyacyl-coenzyme A dehydrogenase, mitochondrial;Isoform of Q16836, Isoform 3 of Hydroxyacyl-coenzy…	1.35694e+06	1.41061e+06	1.60653e+06	835007	867858	1.68715e+06	764770	1.08723e+06	1505814	1.28494e+06	1055402	1.28286e+06	1.19906e+06	1.18519e+06	1.44193e+06	1.2527e+06
P40939	HADHA	Trifunctional enzyme subunit alpha, mitochondrial	1.21166e+06	1.16227e+06	1.0234e+06	681646	860732	1.25432e+06	956009	1.15349e+06	1.29664e+06	1.29402e+06	873908	1.2968e+06	981150	942132	1.27883e+06	1.31555e+06
P55084	HADHB	Trifunctional enzyme subunit beta, mitochondrial	2508384	2.42522e+06	2.61473e+06	1.77015e+06	2.04365e+06	2787697	2365126	2.76865e+06	2.91486e+06	2.90861e+06	1.93323e+06	3.19057e+06	2.25641e+06	1.93698e+06	2.8921e+06	2.7835e+06
Q16775;Q16775-2	HAGH	Hydroxyacylglutathione hydrolase, mitochondrial;Isoform of Q16775, Isoform 2 of Hydroxyacylglutathione hydrolase, mitochondrial	415955	445444	437402	467931	516398	533682	456427	383934	353017	292550	331831	414112	506356	424957	474800	298559
P12081;P12081-4	HARS	Histidine--tRNA ligase, cytoplasmic;Isoform of P12081, Isoform 4 of Histidine--tRNA ligase, cytoplasmic	5279.4	25041.1	11695.8	17709.2	12892.2	13450.1	10084.6	11724.3	15001.3	12738	11339.1	20636.1	17726.6	11418.3	14256.2	15700.5
P49590;P49590-2	HARS2	Probable histidine--tRNA ligase, mitochondrial;Isoform of P49590, Isoform 2 of Probable histidine--tRNA ligase, mitochondrial	3561.78	4733.67	4284.34	22078	NaN	15068.4	22307.9	3327.08	16861.9	15774.2	4098.94	5083.25	14867.6	3128.81	5070.26	17592.5
O00165;O00165-2;O00165-5	HAX1	HCLS1-associated protein X-1;Isoform of O00165, Isoform 2 of HCLS1-associated protein X-1;Isoform of O00165, Isoform 5 of HCLS1-associated protein X-1	5745.37	NaN	275.716	NaN	15434.3	10731.5	431.958	2898.53	9576.16	8840.39	6522.37	10216.4	3627.94	12048.8	8985.98	4655
P69905	HBA1	Hemoglobin subunit alpha	88265776	74187184	72763760	126500600	76844456	61952416	63860408	43740932	50986344	41286616	74346488	76901848	80921392	78161440	102272864	72330000
P68871	HBB	Hemoglobin subunit beta	163431792	159030224	133262904	202815680	132476976	110621472	102831776	74011120	85773328	67292552	99505776	125569816	125951688	142789552	164512688	120407448
P02042	HBD	Hemoglobin subunit delta	87468544	75185120	75582168	126965984	73627976	60228396	45990784	41815968	48672748	39764608	61046088	76209176	81110648	90719528	106912928	76987496
P69891	HBG1	Hemoglobin subunit gamma-1	1236048	498734	18424558	29283810	1.88046e+06	126145	279883	7.82436e+06	458875	673641	283897	305684	2.22411e+06	354344	745078	2.34125e+06
P69892	HBG2	Hemoglobin subunit gamma-2	271658	212973	289180	102539	968097	82412.2	238399	NaN	231073	63848.8	224749	45387.2	1.03716e+06	93342.9	203732	67513.2
Q6B0K9	HBM	Hemoglobin subunit mu	NaN	NaN	1017.04	1062.44	2823.8	730.515	NaN	NaN	NaN	NaN	2041.42	964.185	2385.67	NaN	NaN	NaN
P09105	HBQ1	Hemoglobin subunit theta-1	29229.4	NaN	16286.3	19160.5	18696.6	NaN	NaN	NaN	NaN	NaN	10192.6	13046.3	22418.8	NaN	13541.7	NaN
Q9Y450	HBS1L	HBS1-like protein	21502.7	16852.9	25319.8	NaN	30073.8	24997.7	40544.1	17860.4	24126.9	32805.6	8994.85	NaN	21927.7	24691.8	NaN	19106.4
P53701	HCCS	Cytochrome c-type heme lyase	16581.1	12248.3	14844.8	20045.7	16460.2	17352.3	14512	14153.4	26459.1	24287.6	19921.2	19515	23021.1	21058.9	19010.6	23615.8
A0A024R1R8;Q9Y2S6	hCG_2014768;TMA7	HCG2014768, isoform CRA_a;Translation machinery-associated protein 7	161479	81173.9	47498.4	NaN	1051.71	NaN	NaN	86426.2	185762	NaN	NaN	42658.3	1034.9	300790	247015	124135
Q7Z4H3;Q7Z4H3-2	HDDC2	HD domain-containing protein 2;Isoform of Q7Z4H3, Isoform 2 of HD domain-containing protein 2	40905.3	62287.6	67215.7	45381.3	52270.9	70135.2	54876.1	52611.8	51944	45159.2	46075.2	37728.2	57414.2	82967.5	60744.3	61940.6
H0YNP9;Q8N4P3;Q8N4P3-2	HDDC3	Isoform of Q8N4P3, Guanosine-3',5'-bis(diphosphate) 3'-pyrophosphohydrolase MESH1;Guanosine-3',5'-bis(diphosphate) 3'-pyrophosphohydrolase MESH1;Isoform of Q8N4P3, Isoform 2 of Guanosine-3',5'-bis(diphosphate) 3'-pyrophosphohydrolase MESH1	44879	43787.8	43239	30269.3	38571.6	84806.7	77908.5	40409.6	53315.3	41067.9	68295.9	33261.4	39948.1	39038.5	68185.7	36770.6
P51858	HDGF	Hepatoma-derived growth factor	91614.5	94265.2	95410	87366.1	123640	102946	76611.6	96039	106114	104729	71164.3	92014.5	172367	188995	114609	128603
Q7Z4V5;Q7Z4V5-2;Q7Z4V5-3;Q7Z4V5-4	HDGFL2	Hepatoma-derived growth factor-related protein 2;Isoform of Q7Z4V5, Isoform 2 of Hepatoma-derived growth factor-related protein 2;Isoform of Q7Z4V5, Isoform 3 of Hepatoma-derived growth factor-related protein 2;Isoform of Q7Z4V5, Isoform 4 of Hepatoma-derived growth factor-related protein 2	13763.5	37639.8	52853	NaN	27030.8	NaN	NaN	38324.6	41209.5	24840.9	NaN	25685.3	5515.48	45010.5	17705.2	5356.49
Q9H0R4	HDHD2	Haloacid dehalogenase-like hydrolase domain-containing protein 2	24345.3	20349.4	16721.1	16552.3	18588.5	18290	19934.3	21169.3	21792	17908.7	17063.4	20035.4	20068.6	20667.3	25333.9	19726.9
Q9BSH5	HDHD3	Haloacid dehalogenase-like hydrolase domain-containing protein 3	14782.5	NaN	20984.9	NaN	NaN	9559.71	NaN	11709.7	2705.14	9152.69	6316.07	12285.2	23641.3	15439.8	26082.7	6840.71
Q9BXW7;Q9BXW7-2	HDHD5	Haloacid dehalogenase-like hydrolase domain-containing 5;Isoform of Q9BXW7, Isoform 1 of Haloacid dehalogenase-like hydrolase domain-containing 5	23183.5	26358.8	35067.4	20441.6	18586.1	25899.7	19138.6	23869.3	36539.9	33564	38246.6	29363.5	31650.2	24890.4	25513	27216.3
A0A024R4E5;Q00341;Q00341-2	HDLBP	Isoform of Q00341, High density lipoprotein binding protein (Vigilin), isoform CRA_a;Vigilin;Isoform of Q00341, Isoform 2 of Vigilin	18121.5	12174.5	43490.8	35176.2	27519.6	28044	33000.1	5065.64	19356.3	28841.3	16768.7	55096.4	26246.8	12334.8	20269.6	14477.2
Q9NRV9	HEBP1	Heme-binding protein 1	555213	735634	496714	251902	479654	445953	528253	37431.8	38207.4	506328	435979	491536	518085	48035.7	928361	599359
Q9Y5Z4	HEBP2	Heme-binding protein 2	527675	720610	855872	537994	704232	672154	486788	443258	564230	570519	343835	604804	600102	894404	422035	402927
A0A087X2H1;Q9ULT8	HECTD1	Isoform of Q9ULT8, E3 ubiquitin-protein ligase HECTD1;E3 ubiquitin-protein ligase HECTD1	24601.3	NaN	2719.62	3302.32	4053.51	3951.01	4369.64	NaN	5360.35	6114.56	4548.66	2769.51	3818.36	NaN	4951.42	5494.26
Q5T447;Q5T447-2	HECTD3	E3 ubiquitin-protein ligase HECTD3;Isoform of Q5T447, Isoform 2 of E3 ubiquitin-protein ligase HECTD3	NaN	NaN	3662.17	4098.71	5774.4	4880.2	5649.74	NaN	3479.03	4846.7	4806.53	4392.97	6616.19	NaN	NaN	6365.59
A0A087WSW0;A6NFD8;A6NFD8-4	HELT	Isoform of A6NFD8, Hairy and enhancer of split-related protein HELT;Hairy and enhancer of split-related protein HELT;Isoform of A6NFD8, Isoform 2 of Hairy and enhancer of split-related protein HELT	59324	56607.7	NaN	NaN	NaN	48155.3	43084.8	44248.2	29463.1	NaN	42139.3	NaN	NaN	41899.2	57403.8	35185.5
Q5GLZ8;Q5GLZ8-2;Q5GLZ8-3;Q5GLZ8-6	HERC4	Probable E3 ubiquitin-protein ligase HERC4;Isoform of Q5GLZ8, Isoform 2 of Probable E3 ubiquitin-protein ligase HERC4;Isoform of Q5GLZ8, Isoform 3 of Probable E3 ubiquitin-protein ligase HERC4;Isoform of Q5GLZ8, Isoform 6 of Probable E3 ubiquitin-protein ligase HERC4	NaN	NaN	22570.3	NaN	NaN	NaN	4196.77	NaN	NaN	9012.92	18004.3	NaN	8512.3	NaN	NaN	NaN
H0Y9B6;H0YA83;P07686;Q5URX0	HEXB;HEXB;HEXB;HEL-248	Isoform of P07686, Beta-hexosaminidase subunit beta (Fragment);Isoform of P07686, Beta-hexosaminidase subunit beta (Fragment);Beta-hexosaminidase subunit beta;Isoform of P07686, Beta-hexosaminidase subunit beta	NaN	NaN	NaN	NaN	NaN	5477.19	NaN	4828.75	NaN	NaN	2394.59	NaN	NaN	12976.2	6373.12	6161.09
J3QKL0;Q8WVB3;Q8WVB3-2	HEXDC	Isoform of Q8WVB3, Hexosaminidase D;Hexosaminidase D;Isoform of Q8WVB3, Isoform 2 of Hexosaminidase D	NaN	3042.16	3172.69	NaN	4831.86	NaN	NaN	4123.43	NaN	NaN	NaN	NaN	NaN	2809.33	NaN	3014.96
Q9BTY7	HGH1	Protein HGH1 homolog	8032.2	NaN	18046	NaN	8411.62	NaN	20851.8	18064.7	NaN	13109.8	9962.05	16513.4	11974.2	15261.7	7376.17	22811.7
O14964;O14964-2	HGS	Hepatocyte growth factor-regulated tyrosine kinase substrate;Isoform of O14964, Isoform 2 of Hepatocyte growth factor-regulated tyrosine kinase substrate	17269.6	75745.3	NaN	14945.5	11381.3	9193.96	12331.2	9665.38	17882.1	14676.9	7555.9	21432.4	14728.9	13423.6	16596.8	15481.9
Q9HCP6	HHATL	Protein-cysteine N-palmitoyltransferase HHAT-like protein	19312.5	26216.2	25294.5	25550.2	27972.6	18860.3	17823.3	33445.4	26452.7	39553.1	35965.6	37856.6	22136.1	19771.8	17121.4	33927.2
P31937	HIBADH	3-hydroxyisobutyrate dehydrogenase, mitochondrial	538853	472560	518371	388920	330508	406205	291788	416380	622008	514709	426823	468970	414989	349164	393560	437688
Q6NVY1	HIBCH	3-hydroxyisobutyryl-CoA hydrolase, mitochondrial	157514	165092	131737	140669	157284	139153	132306	147917	198748	208206	104809	155390	166862	116213	187952	192794
Q9NWT6	HIF1AN	Hypoxia-inducible factor 1-alpha inhibitor	43084.4	NaN	127216	124487	121494	41040.3	42605.2	29563.3	19532.6	52524.7	6379.95	262267	83667.9	97639.7	45419.6	36393.5
Q9BW72	HIGD2A	HIG1 domain family member 2A, mitochondrial	189768	175276	98942.3	55664.3	79560.6	129239	110121	118519	193309	133382	139459	93950.9	65628.7	116331	69475	76263.4
Q53FT3	HIKESHI	Protein Hikeshi	85715.8	36048.8	39835.3	39995.5	43024.7	56561.2	40202.4	87058.8	58266.8	40319.4	50036.6	40610.2	42594.2	50754.5	42322.7	34175.1
P49773	HINT1	Histidine triad nucleotide-binding protein 1	522589	521409	658050	599241	790782	716850	624314	488893	687224	619098	554600	740416	873618	890242	616380	657451
Q9BX68	HINT2	Histidine triad nucleotide-binding protein 2, mitochondrial	181348	148174	124564	279605	79908	124875	114150	136117	146111	348836	137958	300904	190294	140021	134035	136024
Q9NQE9	HINT3	Histidine triad nucleotide-binding protein 3	40587.3	56771.9	51534.4	29942.1	42328.4	34921.2	29192.7	29899.6	38938.1	38293.3	33934.2	55382.2	27542.7	31219.7	21190.7	33144.6
P16401	HIST1H1B	Histone H1.5	2.58571e+06	2.39175e+06	3.63774e+06	4442340	3.34831e+06	2.53678e+06	1.86792e+06	1.75718e+06	155435	2.25451e+06	1.87317e+06	3.11923e+06	1.86922e+06	308664	74971.4	2.21963e+06
P16403	HIST1H1C	Histone H1.2	1.06723e+06	1.20318e+06	878632	733040	1.09818e+06	1.27696e+06	807439	446082	994906	696024	323596	1.01657e+06	489725	1.10903e+06	565529	367542
P10412	HIST1H1E	Histone H1.4	2.08869e+06	1.96246e+06	2.83716e+06	1.77565e+06	2.64559e+06	2.06126e+06	1.49425e+06	1.40902e+06	2.18034e+06	1.81928e+06	1.48185e+06	2.48455e+06	2.30268e+06	4.46383e+06	2.42716e+06	1.83447e+06
P06899;P23527;P33778;Q16778;Q8N257	HIST1H2BJ;HIST1H2BO;HIST1H2BB;HIST2H2BE;HIST3H2BB	Histone H2B type 1-J;Histone H2B type 1-O;Histone H2B type 1-B;Histone H2B type 2-E;Histone H2B type 3-B	200034	268193	175920	114434	268992	102907	91296.4	164983	100904	131620	214697	117291	137599	180329	222419	89401.7
O60814;P57053;P58876;P62807;Q5QNW6;Q5QNW6-2;Q93079;Q99877;Q99879;Q99880;U3KQK0	HIST1H2BK;H2BFS;HIST1H2BD;HIST1H2BC;HIST2H2BF;HIST2H2BF;HIST1H2BH;HIST1H2BN;HIST1H2BM;HIST1H2BL;HIST1H2BN	Histone H2B type 1-K;Histone H2B type F-S;Histone H2B type 1-D;Histone H2B type 1-C/E/F/G/I;Histone H2B type 2-F;Isoform of Q5QNW6, Isoform 2 of Histone H2B type 2-F;Histone H2B type 1-H;Histone H2B type 1-N;Histone H2B type 1-M;Histone H2B type 1-L;Isoform of Q99877, Histone H2B	1.06115e+06	889446	1.20076e+06	913157	1.25704e+06	1.14752e+06	872858	954800	1.0962e+06	1.01005e+06	1.34041e+06	1.05345e+06	1.21915e+06	1.31391e+06	1.58082e+06	1.33876e+06
A0A0U1RR32;A0A0U1RRH7;P04908;P0C0S8;P16104;P20671;Q7L7L0;Q93077;Q96KK5;Q99878;Q9BTM1	HIST1H3D;HIST1H3D;HIST1H2AB;HIST1H2AG;H2AFX;HIST1H2AD;HIST3H2A;HIST1H2AC;HIST1H2AH;HIST1H2AJ;H2AFJ	Isoform of P68431, Histone H2A;Isoform of P68431, Histone H2A;Histone H2A type 1-B/E;Histone H2A type 1;Histone H2AX;Histone H2A type 1-D;Histone H2A type 3;Histone H2A type 1-C;Histone H2A type 1-H;Histone H2A type 1-J;Histone H2A.J	2061810	1.72682e+06	2.16073e+06	1.58016e+06	2.16936e+06	1.88149e+06	1.52297e+06	1.61752e+06	1.8612e+06	1.95911e+06	1.79685e+06	2.01816e+06	2.2031e+06	2.41949e+06	2.59463e+06	2.01028e+06
P62805	HIST1H4A	Histone H4	962212	870401	1.163e+06	828022	1.15098e+06	947842	799624	845377	1.02442e+06	963031	866517	919657	1.15881e+06	1.14051e+06	1.27793e+06	1.0352e+06
Q16777;Q6FI13	HIST2H2AC;HIST2H2AA3	Histone H2A type 2-C;Histone H2A type 2-A	NaN	NaN	NaN	25822.4	NaN	NaN	NaN	NaN	NaN	NaN	NaN	NaN	NaN	NaN	NaN	NaN
P19367;P19367-2;P19367-3;P19367-4	HK1	Hexokinase-1;Isoform of P19367, Isoform 2 of Hexokinase-1;Isoform of P19367, Isoform 3 of Hexokinase-1;Isoform of P19367, Isoform 4 of Hexokinase-1	107244	104742	101017	104840	108717	91917	67426.9	113029	133477	134748	134566	154841	141699	96511.3	98960	160993
E9PB90;P52789	HK2	Isoform of P52789, Hexokinase-2;Hexokinase-2	NaN	NaN	1310.64	NaN	NaN	10043.3	NaN	NaN	1195.85	NaN	7752.18	NaN	NaN	NaN	11675.5	7137.24
A0A140T975;A0A1W2PS39;P10314;P30459;Q9GJ45	HLA-A	Isoform of P01891, HLA class I histocompatibility antigen, A-3 alpha chain;Isoform of P01891, HLA class I histocompatibility antigen, A-3 alpha chain;Isoform of P01891, HLA class I histocompatibility antigen, A-32 alpha chain;Isoform of P01891, HLA class I histocompatibility antigen, A-74 alpha chain;Isoform of P01891, HLA class I histocompatibility antigen, A-3 alpha chain	NaN	NaN	NaN	NaN	66060.8	37528.4	35720.7	12444.9	NaN	7090.64	11076.4	8250.61	57259.7	50808.4	23701.4	15285.7
P05534;P30447	HLA-A	Isoform of P01891, HLA class I histocompatibility antigen, A-24 alpha chain;Isoform of P01891, HLA class I histocompatibility antigen, A-23 alpha chain	98339.5	80429.6	112687	80145.4	93551.6	51184.4	36033.8	77889.7	128702	71396.2	71318.8	114016	90479.7	88452.7	57664.4	77988.4
P30486	HLA-B	Isoform of Q31612, HLA class I histocompatibility antigen, B-48 alpha chain	33116	32948.6	24951.8	15265.2	25544.4	21513.3	19311	24886.8	33089.8	22082.9	23043.7	17161.2	44886.7	35574.3	29255.3	39340.4
A0A140T921;A0A140T9H5;A0A140T9U8;A2AEA2;O19617;P10321	HLA-C	Isoform of Q95604, HLA class I histocompatibility antigen, Cw-6 alpha chain;Isoform of Q95604, HLA class I histocompatibility antigen, Cw-6 alpha chain;Isoform of Q95604, HLA class I histocompatibility antigen, Cw-6 alpha chain;Isoform of Q95604, HLA class I histocompatibility antigen, Cw-6 alpha chain;Isoform of Q95604, HLA class I antigen;Isoform of Q95604, HLA class I histocompatibility antige…	NaN	NaN	NaN	7230.99	NaN	NaN	1853.07	NaN	7479.99	NaN	8394.28	4677.52	16920.3	NaN	14037.4	NaN
Q95604	HLA-C	HLA class I histocompatibility antigen, Cw-17 alpha chain	NaN	28320.6	NaN	NaN	NaN	NaN	32915.5	28779	NaN	44392	NaN	5536	NaN	2812.11	42106	22851.3
A0A140T8Z9;A0A140T900;A0A140T909;A0A140T914;A0A140T961;A0A140T968;A0A140T977;A0A140T980;A0A140T992;A0A140T9A6;A0A140T9D6;A0A140T9F8;A0A140T9G7;A0A140T9G9;A0A140T9H1;A0A140T9J4;A0A140T9R4;A0A140T9U1;A0A140T9U4;A0A140T9Y8;A0A140T9Y9;E9PMV2;H0Y6F8;J3KQ99;P20036	HLA-DPA1;HLA-DPA1;HLA-DPA1;HLA-DPA1;HLA-DPA1;HLA-DPA1;HLA-DPA1;HLA-DPA1;HLA-DPA1;HLA-DPA1;HLA-DPA1;HLA-DPA1;HLA-DPA1;HLA-DPA1;HLA-DPA1;HLA-DPA1;HLA-DPA1;HLA-DPA1;HLA-DPA1;HLA-DPA1;HLA-DPA1;HLA-DQA1;HLA-DPA1;HLA-DPA1;HLA-DPA1	Isoform of P20036, HLA class II histocompatibility antigen, DP alpha 1 chain (Fragment);Isoform of P20036, HLA class II histocompatibility antigen, DP alpha 1 chain (Fragment);Isoform of P20036, HLA class II histocompatibility antigen, DP alpha 1 chain (Fragment);Isoform of P20036, HLA class II histocompatibility antigen, DP alpha 1 chain (Fragment);Isoform of P20036, HLA class II histocompatibil…	NaN	NaN	11929.5	NaN	6777.47	NaN	NaN	NaN	NaN	5732.35	8408.64	NaN	NaN	NaN	NaN	9928.61
A0A0G2JMH6;P01903	HLA-DRA	Isoform of P01903, HLA class II histocompatibility antigen, DR alpha chain;HLA class II histocompatibility antigen, DR alpha chain	19349.1	16077.6	15606.1	12556	13070.7	31636.3	20349.1	16279.4	13420.8	14070.1	20717.8	12952.8	16258.6	28108.1	16983	15607.9
P01911	HLA-DRB1	HLA class II histocompatibility antigen, DRB1-15 beta chain	20452.2	12450.2	27195.3	NaN	27762.1	27673.4	8500.29	13206.4	12277.3	18673.3	31069.6	NaN	21551.5	252796	NaN	15595.6
P13760	HLA-DRB1	Isoform of P01911, HLA class II histocompatibility antigen, DRB1-4 beta chain	34623.6	NaN	4157.52	8487.13	21814.5	19208.1	11029.8	8658	36720.8	NaN	NaN	22088.1	27941.3	32815.8	14750	6484.33
P20039	HLA-DRB1	Isoform of P01911, HLA class II histocompatibility antigen, DRB1-11 beta chain	NaN	13661.4	25981.5	NaN	NaN	NaN	NaN	NaN	NaN	NaN	NaN	NaN	NaN	NaN	NaN	NaN
A0A0D9SFW8;P30511;P30511-3	HLA-F	Isoform of P30511, HLA class I histocompatibility antigen, alpha chain F (Fragment);HLA class I histocompatibility antigen, alpha chain F;Isoform of P30511, Isoform 3 of HLA class I histocompatibility antigen, alpha chain F	93584.1	72660.4	83074.2	73340	129097	125825	98598.8	75825.4	107845	66660.8	67074.9	76531.1	125444	147641	98718.3	84338.7
P01893	HLA-H	Putative HLA class I histocompatibility antigen, alpha chain H	NaN	2594.04	NaN	NaN	NaN	5084.04	NaN	NaN	NaN	NaN	NaN	3727.87	NaN	6993.91	NaN	6616.11
P50747	HLCS	Biotin--protein ligase	NaN	NaN	1200.35	1369.38	1502.08	5453.42	923.31	NaN	NaN	1898.81	NaN	1589.29	1703.78	NaN	NaN	1482.95
F5H345;P08397;P08397-2	HMBS	Isoform of P08397, Porphobilinogen deaminase;Porphobilinogen deaminase;Isoform of P08397, Isoform 2 of Porphobilinogen deaminase	359843	234729	431482	336705	425264	525746	1049209	612289	488181	505218	699092	351080	477341	570992	755717	636346
Q8NDA2	HMCN2	Hemicentin-2	NaN	4295.8	NaN	NaN	5275.33	NaN	1928.44	NaN	NaN	1555.04	NaN	NaN	3552.07	4362.64	10041.8	8148.91
P17096;P17096-3	HMGA1	High mobility group protein HMG-I/HMG-Y;Isoform of P17096, Isoform HMG-R of High mobility group protein HMG-I/HMG-Y	61856.7	55508.4	61234	56543.8	118949	98203.1	58549.4	49814.3	73528.7	75862.6	55349.2	78229.8	93421.8	121049	77872.6	85443.4
P09429;Q5T7C4	HMGB1	High mobility group protein B1;Isoform of P09429, High mobility group protein B1	301616	330798	450956	274209	484652	379622	299889	166886	359691	402789	239094	388283	263551	339900	278266	252101
P26583	HMGB2	High mobility group protein B2	229879	244790	542128	354896	523022	289467	268000	207845	208163	332075	176310	328987	299184	207766	167514	228291
P35914	HMGCL	Hydroxymethylglutaryl-CoA lyase, mitochondrial	28828.9	23144.6	41736.9	NaN	26999.9	33237.9	22267.1	41758.5	46821.8	18263	32276.7	26284.9	17321	30737.9	11990.7	21680.1
P54868	HMGCS2	Hydroxymethylglutaryl-CoA synthase, mitochondrial	NaN	26963.4	NaN	NaN	NaN	NaN	11202.3	NaN	NaN	32827.9	NaN	39956.9	9118.54	NaN	16180.6	47263.3
A6NEL0;A6NL93;P05114	HMGN1	Isoform of P05114, Non-histone chromosomal protein HMG-14;Isoform of P05114, Non-histone chromosomal protein HMG-14;Non-histone chromosomal protein HMG-14	12759.4	10327.1	13569.3	12054.2	12779.7	16412.5	11686.7	8731.2	19203.3	14514.8	11971.9	18501.8	16697.1	47696	18328	15396
P05204	HMGN2	Non-histone chromosomal protein HMG-17	44437.9	36771.8	28577.5	35138	NaN	60970.4	34929	37975.7	44304.9	45534.4	29648.1	64008.2	63405.1	131652	77723.9	36461.7
A0A087WZE9	HMGN3	Isoform of Q15651, High mobility group nucleosome-binding domain-containing protein 3	44894.4	40904.6	61771.5	39794.4	46330.8	55116.9	36682	47638	52302.7	60324.3	47377.2	56580	65021.8	107280	62150.4	77205.8
O00479	HMGN4	High mobility group nucleosome-binding domain-containing protein 4	18184.8	14876.8	21069.8	9225.57	18115.7	14838.4	14405.3	12749.5	22538.1	16455.6	4407	17945	26940.4	46826.4	25587.4	21943.6
P82970	HMGN5	High mobility group nucleosome-binding domain-containing protein 5	NaN	NaN	NaN	NaN	NaN	19037	8164.91	NaN	7961.53	22669.3	NaN	1030.95	1228.14	12664.5	4801.51	NaN
P09601	HMOX1	Heme oxygenase 1	6919.76	NaN	7927.1	5340.56	7443.02	NaN	19316.4	NaN	8434.34	7227.07	NaN	7193.32	NaN	4874.01	6247.14	NaN
A0A087WT44;P30519	HMOX2	Isoform of P30519, Heme oxygenase 2;Heme oxygenase 2	15890.8	14830.7	3224.69	38098.4	6465.59	4261.92	7300.95	16904.6	22601.7	21366.6	18958.6	8034.1	13543.7	16469.9	14107.5	17216.2
Q13151	HNRNPA0	Heterogeneous nuclear ribonucleoprotein A0	5479.62	2558.92	6815.26	5820.79	5354.93	4723	3953.39	5481.21	5077.45	5262.8	3642.61	4169.02	6399.04	6042.39	5524.3	5893.85
F8W6I7;P09651;P09651-2;P09651-3	HNRNPA1	Isoform of P09651, Heterogeneous nuclear ribonucleoprotein A1;Heterogeneous nuclear ribonucleoprotein A1;Isoform of P09651, Isoform A1-A of Heterogeneous nuclear ribonucleoprotein A1;Isoform of P09651, Isoform 2 of Heterogeneous nuclear ribonucleoprotein A1	64806.6	70545	81504.9	73852.3	77271.8	80666.7	61719.1	70398.2	63268	72370.2	71788.1	68865.3	69820.2	78070.9	65706.6	69928.8
P22626	HNRNPA2B1	Heterogeneous nuclear ribonucleoproteins A2/B1	95940.6	89070.7	79066.7	80125.8	85555.6	78517.5	81492.9	89851.2	111689	109499	126386	71890.9	113429	155885	123020	88159.9
P51991	HNRNPA3	Heterogeneous nuclear ribonucleoprotein A3	81735.9	66210.9	79187.4	71557.2	67935.5	61346.8	76000.7	73781.3	75863.8	68116.6	85832.5	57806.6	56914.2	77599.9	87839.2	70878.1
Q99729-3	HNRNPAB	Isoform of Q99729, Isoform 3 of Heterogeneous nuclear ribonucleoprotein A/B	9284.77	34095	7143.61	5978.9	8854.84	14621	6121.76	6398.92	7872.52	6113.48	7633.79	7403.39	7751.94	13244.8	10344.8	7047.37
B2R5W2;B4DY08;G3V4C1;G3V4W0;P07910-2	HNRNPC	Isoform of P07910, Heterogeneous nuclear ribonucleoproteins C1/C2;Isoform of P07910, Heterogeneous nuclear ribonucleoproteins C1/C2;Isoform of P07910, Heterogeneous nuclear ribonucleoproteins C1/C2;Isoform of P07910, Heterogeneous nuclear ribonucleoproteins C1/C2 (Fragment);Isoform of P07910, Isoform C1 of Heterogeneous nuclear ribonucleoproteins C1/C2	46540.2	68265.7	65634.3	97665.9	134977	103482	50350.5	49034.6	43814.9	119778	73336.9	52957.7	77381.6	108070	89612.7	83997.1
Q14103;Q14103-3	HNRNPD	Heterogeneous nuclear ribonucleoprotein D0;Isoform of Q14103, Isoform 3 of Heterogeneous nuclear ribonucleoprotein D0	76629.7	79670.6	104847	78955.8	102932	90196.2	66654.2	70616.2	85647	85553.1	86553.8	92982.1	84876.3	120682	100019	67962.5
A0A087WUK2;O14979;O14979-2;O14979-3	HNRNPDL	Isoform of O14979, Heterogeneous nuclear ribonucleoprotein D-like;Heterogeneous nuclear ribonucleoprotein D-like;Isoform of O14979, Isoform 2 of Heterogeneous nuclear ribonucleoprotein D-like;Isoform of O14979, Isoform 3 of Heterogeneous nuclear ribonucleoprotein D-like	70597.3	60996.4	113042	103628	101781	74631.4	103331	80914.7	92768.5	96865.7	87661.3	96233.8	117266	131719	79340.5	81148.2
P52597	HNRNPF	Heterogeneous nuclear ribonucleoprotein F	21325.1	22181.9	15039.6	14192	13890.6	9194.24	6374.43	15482.4	19344.5	8725.46	11866.5	8362.54	15013.7	21427.4	14965.8	11085
G8JLB6;P31943	HNRNPH1	Isoform of P31943, Heterogeneous nuclear ribonucleoprotein H;Heterogeneous nuclear ribonucleoprotein H	61991.1	59639.5	71465.3	57735.3	63263.4	60866.7	56406.3	57105.2	66453.7	64646.9	63508.1	54534.4	56012.3	57712.8	69948.6	47852.6
P55795	HNRNPH2	Heterogeneous nuclear ribonucleoprotein H2	10402.2	25544.2	4729.93	5161.6	9083.97	7811.84	9036.25	8891.88	8315.42	10022.7	10165.7	18093.8	18542.2	9520.47	22626.3	8880.13
P31942;P31942-2	HNRNPH3	Heterogeneous nuclear ribonucleoprotein H3;Isoform of P31942, Isoform 2 of Heterogeneous nuclear ribonucleoprotein H3	31968.6	32133.8	31002	30684.9	43377.3	30771.8	29724.3	30414.5	29538.1	27485.3	33068.1	28292.5	35049.5	46961.4	40226.8	27825.7
P61978;P61978-2	HNRNPK	Heterogeneous nuclear ribonucleoprotein K;Isoform of P61978, Isoform 2 of Heterogeneous nuclear ribonucleoprotein K	270463	233446	289976	218611	252545	274703	239893	275751	306176	261054	274143	241956	305573	446692	339201	271666
P14866	HNRNPL	Heterogeneous nuclear ribonucleoprotein L	28759.1	31824.4	36340.6	28078	33673.6	32573.3	25423.3	14888.2	29204.8	30647.4	28542	34619.6	33276.3	32355.5	36769.5	30467.7
A0A087X0X3;P52272;P52272-2	HNRNPM	Isoform of P52272, Heterogeneous nuclear ribonucleoprotein M;Heterogeneous nuclear ribonucleoprotein M;Isoform of P52272, Isoform 2 of Heterogeneous nuclear ribonucleoprotein M	69172.2	32584.3	88787.6	63241.3	77204.4	73319.3	53811	31209.7	79163.1	76456.8	70482.2	78856.9	86211.8	84753.3	81642.8	73759.9
O43390	HNRNPR	Heterogeneous nuclear ribonucleoprotein R	46789.3	47592.4	64929.2	52840.2	60500.7	57535.2	42344.2	49967.7	50635.4	39143.1	41826.1	41995.3	48042	52002.6	51079.6	48229
Q00839	HNRNPU	Heterogeneous nuclear ribonucleoprotein U	156609	175214	214602	117898	169108	170936	127044	123905	149047	122748	116072	128648	125221	133829	144059	117220
A0A0A0MRA5;B7Z4B8;Q9BUJ2;Q9BUJ2-2;Q9BUJ2-4	HNRNPUL1	Isoform of Q9BUJ2, Heterogeneous nuclear ribonucleoprotein U-like protein 1;Isoform of Q9BUJ2, Heterogeneous nuclear ribonucleoprotein U-like protein 1;Heterogeneous nuclear ribonucleoprotein U-like protein 1;Isoform of Q9BUJ2, Isoform 2 of Heterogeneous nuclear ribonucleoprotein U-like protein 1;Isoform of Q9BUJ2, Isoform 4 of Heterogeneous nuclear ribonucleoprotein U-like protein 1	3509.86	9406.64	11990.7	20414.5	7456.54	11861.3	6115.27	4193.42	4621.03	5053.31	2678.48	7771.14	11158.5	5912.7	6471.4	9500.95
Q1KMD3	HNRNPUL2	Heterogeneous nuclear ribonucleoprotein U-like protein 2	33450.9	34644.4	49213.1	26938.2	46679.9	54190	28865.7	28459	30962.3	40640.6	24819.8	28969.9	45696	37393.4	38704.5	34763.2
Q86YM7	HOMER1	Homer protein homolog 1	15143.1	6981.71	11265.1	13067.7	10627.2	9187.6	15690	12567.6	14736.7	12292.3	8639.48	9729.61	11351.5	13117.6	13114.2	9045.89
Q9NSC5;Q9NSC5-2;Q9NSC5-5	HOMER3	Homer protein homolog 3;Isoform of Q9NSC5, Isoform 2 of Homer protein homolog 3;Isoform of Q9NSC5, Isoform 5 of Homer protein homolog 3	17725.4	19361.2	NaN	28668.1	22982.9	4816.19	5401.16	11676.9	15817.7	19559.7	NaN	19620.4	19909.5	18763.8	10254	5165.91
Q86VS8	HOOK3	Protein Hook homolog 3	15157.7	14414.9	12725.2	19094	17316.7	17975.9	13883.7	14792.5	16748.1	15570.1	11524	17465.6	18766.1	19525.5	15030.7	13715.6
P00738	HP	Haptoglobin	216892	433678	352405	940570	366276	408862	624931	469233	139321	404471	417607	417000	227049	653871	984468	462700
Q5SSJ5	HP1BP3	Heterochromatin protein 1-binding protein 3	37845.9	31879.8	40228.7	31447.8	39973.6	41547.8	36046.8	33341.9	38378.9	39068.6	33125.8	34669.9	50913	45686.4	33432.4	34378.6
P37235	HPCAL1	Hippocalcin-like protein 1	2086.13	NaN	NaN	NaN	12340.7	NaN	NaN	NaN	6397.92	9572	5516.26	1911.62	8423.41	8611.55	5924.69	13999
P00492	HPRT1	Hypoxanthine-guanine phosphoribosyltransferase	12966.3	20334.2	12091.1	14027.4	7886.63	16287.6	15643.5	16352.8	21947.6	5217.59	25593.8	16642.7	21984.3	35802.2	28873.6	22512.9
P02790	HPX	Hemopexin	351174	329833	375958	420984	450503	311720	166026	215395	222051	251022	206505	391966	319919	407817	334802	258927
M0QZ43;P23327	HRC	Isoform of P23327, Sarcoplasmic reticulum histidine-rich calcium-binding protein;Sarcoplasmic reticulum histidine-rich calcium-binding protein	836081	906693	931906	725537	1.05189e+06	1.13691e+06	508185	863665	1.08137e+06	692966	640913	1027066	1056531	2.13679e+06	887953	889407
P04196	HRG	Histidine-rich glycoprotein	48936.7	52377.4	39646.7	76730.5	54786.7	23702.2	33032.3	21223.3	37459.1	20199.7	32363.2	38396.9	39501.6	35547.8	33765.9	18644.8
O75506	HSBP1	Heat shock factor-binding protein 1	52292.3	65432.5	23769.5	31225.4	61319.5	18762	19587.4	NaN	14168.6	19428.1	5999.93	27899.9	20455.1	50845.9	50792.3	19555.1
Q8IWL3	HSCB	Iron-sulfur cluster co-chaperone protein HscB, mitochondrial	5510.27	39976	4398.64	72389.8	5215.79	NaN	18472	7014.8	9358.98	8676.27	9936.66	5378.02	9087.5	6691.27	7287.14	9581.26
Q99714	HSD17B10	3-hydroxyacyl-CoA dehydrogenase type-2	195553	211943	261909	207200	180739	239885	179955	199532	247306	307252	203766	233958	240183	176485	208192	242797
Q53GQ0	HSD17B12	Very-long-chain 3-oxoacyl-CoA reductase	NaN	NaN	NaN	NaN	NaN	NaN	8201.94	10750.7	NaN	NaN	9158.38	NaN	NaN	7765.01	9788.71	NaN
P51659	HSD17B4	Peroxisomal multifunctional enzyme type 2	6588.12	4916.22	5295.74	3402.09	5858.89	7378.38	3832.42	6862.01	7146.08	5551.7	24079.1	6122	4328.8	4044.86	4652.25	6684.94
Q92506	HSD17B8	Estradiol 17-beta-dehydrogenase 8	72461.6	58907.6	69197.2	60508.8	58503.1	78278.5	52950.5	60406.9	71080.1	85846.3	38605.5	92212.7	79215.8	63420.1	79475.8	85097.3
Q6YN16	HSDL2	Hydroxysteroid dehydrogenase-like protein 2	277922	254878	302693	170939	173610	368780	219635	292645	391055	330338	247854	337151	243564	244466	272280	278257
P07900;P07900-2	HSP90AA1	Heat shock protein HSP 90-alpha;Isoform of P07900, Isoform 2 of Heat shock protein HSP 90-alpha	157092	175172	241385	187352	254053	226375	173550	151268	198270	295120	181247	254688	285091	219168	194850	294019
P08238	HSP90AB1	Heat shock protein HSP 90-beta	1.27784e+06	1407986	1.3963e+06	1.21993e+06	1.63533e+06	1531292	1.29079e+06	1.28738e+06	1.58591e+06	1.5125e+06	1.37112e+06	1.4193e+06	1.7822e+06	1.52585e+06	1.52982e+06	1.82863e+06
Q58FF8	HSP90AB2P	Putative heat shock protein HSP 90-beta 2	57389.9	63149.9	85585.4	61815.9	76762.9	67662.5	68454.4	54310.1	68175.9	59754.3	68287	93830.2	69717.3	60214.9	64375.4	57620.2
P14625	HSP90B1	Endoplasmin	63547.9	51168.3	46288.1	69199.1	51675.3	47183.2	51146.6	51065.3	72145.7	63061.7	59201.1	62590	57979.4	90331.4	73171.7	74128.5
A0A1B0GTF3;O43301	HSPA12A	Isoform of O43301, Heat shock 70 kDa protein 12A;Heat shock 70 kDa protein 12A	NaN	12329.4	8090.95	6157.11	4999.74	25164.9	4571.55	NaN	11361.8	6100.64	16981.7	10166.5	4708.1	9639.84	10697.8	12096.3
Q5JX83;Q96MM6	HSPA12B	Isoform of Q96MM6, Heat shock 70 kDa protein 12B;Heat shock 70 kDa protein 12B	NaN	25227.7	4955.21	NaN	NaN	9442.87	14871.4	NaN	16366.5	3838.8	NaN	11364.8	5265.7	NaN	NaN	2364.24
A0A0G2JIW1;P0DMV8;P0DMV9	HSPA1B;HSPA1A;HSPA1B	Isoform of P0DMV9, Heat shock 70 kDa protein 1B;Heat shock 70 kDa protein 1A;Heat shock 70 kDa protein 1B	1.19608e+06	1.53807e+06	1.22181e+06	1.20583e+06	1.28414e+06	1.64914e+06	1.26559e+06	1.34762e+06	1274218	1.37728e+06	1.06681e+06	1254420	1.38932e+06	1.06065e+06	1.20748e+06	1.25156e+06
P34931;Q53FA3	HSPA1L	Heat shock 70 kDa protein 1-like;Isoform of P34931, HSPA1L (Fragment)	183094	70239.2	295626	321999	219909	209786	177577	294799	145189	200070	82978.3	240821	248402	265669	197454	171263
P54652	HSPA2	Heat shock-related 70 kDa protein 2	208638	424991	224394	829680	733169	395550	397174	223114	187514	407389	164010	764608	510964	298335	356154	182675
P34932	HSPA4	Heat shock 70 kDa protein 4	181307	166925	180639	155676	198503	183355	151286	113524	135956	144200	89869.1	160575	155689	128196	119769	102382
O95757	HSPA4L	Heat shock 70 kDa protein 4L	33993.2	NaN	67433.1	27447.2	27758.7	14601.5	9494.27	10598.4	11247.3	20779.6	17008.2	63827.5	44964.1	10433.8	15151.5	94425.6
P11021	HSPA5	78 kDa glucose-regulated protein	146057	146134	132540	118616	162307	150690	87637	116023	163748	130640	114433	123913	170472	239718	138227	126266
P17066	HSPA6	Heat shock 70 kDa protein 6	2.66688e+06	3.14437e+06	2.57462e+06	3.68996e+06	3.36576e+06	2343457	3.08102e+06	2.43441e+06	2.66043e+06	3.12947e+06	3.05152e+06	2.80978e+06	3316351	2616980	3.29618e+06	3.11871e+06
P11142	HSPA8	Heat shock cognate 71 kDa protein	2.02375e+06	2.12003e+06	2.30914e+06	2.31481e+06	2.52816e+06	2.34576e+06	1.99951e+06	1.58605e+06	1.86671e+06	1.85151e+06	1.71192e+06	1.73895e+06	2063134	1.67445e+06	1.69137e+06	1.66798e+06
P38646	HSPA9	Stress-70 protein, mitochondrial	906232	837286	918590	717068	615590	837292	583115	880526	1.20361e+06	1038874	982972	1.09515e+06	917906	1.2393e+06	1.01539e+06	1.08555e+06
P04792	HSPB1	Heat shock protein beta-1	4.96748e+06	7032340	5.73576e+06	7251472	8643963	6077181	5.70425e+06	4.75175e+06	3934145	5.29571e+06	3.55505e+06	5371383	7.29442e+06	6.83321e+06	5.4274e+06	4200308
A8KAH6;Q16082	HSPB2-C11orf52;HSPB2	Heat shock 27kDa protein 2, isoform CRA_a;Heat shock protein beta-2	821970	674442	720457	583950	763008	877102	535972	550983	636326	445122	383565	603795	832858	1.23775e+06	879873	543696
Q12988	HSPB3	Heat shock protein beta-3	64547.3	42078	51723.7	61841	71193.9	58839.2	56546.2	54570.9	49041.4	48615.8	54879.8	53609.8	72731.4	79343.7	95452.4	59527.6
O14558	HSPB6	Heat shock protein beta-6	3.05256e+06	4.52216e+06	4.53957e+06	3.43065e+06	4590542	6.88667e+06	3.82468e+06	3.71937e+06	3172293	4248475	3458252	4725170	5920693	8541505	4305452	3160315
Q9UBY9	HSPB7	Heat shock protein beta-7	113074	106666	89932.1	105684	100964	92337.3	114152	88307.9	90185.2	103254	73941.4	115765	108900	148766	140060	109423
Q9UBY9-2	HSPB7	Isoform of Q9UBY9, Isoform 2 of Heat shock protein beta-7	1.19221e+06	2.01763e+06	1.50646e+06	1.54887e+06	1.68641e+06	1759183	1.65458e+06	1.49678e+06	1.45757e+06	1.406e+06	1.26579e+06	1.69262e+06	1.82785e+06	2.7214e+06	1.49877e+06	1.88892e+06
Q9UJY1	HSPB8	Heat shock protein beta-8	222929	315820	325413	316356	364740	348783	315620	249152	256240	335620	236460	401426	425299	662157	324855	349667
Q9NZL4;Q9NZL4-2;Q9NZL4-3	HSPBP1	Hsp70-binding protein 1;Isoform of Q9NZL4, Isoform 2 of Hsp70-binding protein 1;Isoform of Q9NZL4, Isoform 3 of Hsp70-binding protein 1	11730.4	7701.89	15162.2	10245.1	10194.1	14061	7123.72	10463.6	18084.7	14605.7	12740.6	17382.8	12818.2	14122.9	11671.4	14174.1
P10809	HSPD1	60 kDa heat shock protein, mitochondrial	467628	564760	514983	325489	314502	429874	332609	495062	690222	624308	475214	645756	545680	350828	420776	529996
P61604	HSPE1	10 kDa heat shock protein, mitochondrial	1.36544e+06	1.37146e+06	1.15932e+06	931588	861024	1.34074e+06	943901	1.44564e+06	2536213	1.89416e+06	1.40273e+06	1.92362e+06	1.62638e+06	2.90226e+06	1.54868e+06	2.29416e+06
P98160	HSPG2	Basement membrane-specific heparan sulfate proteoglycan core protein	101221	116669	104833	107972	97738.4	118059	133417	96841.2	100857	103862	117092	106542	99876.9	107334	177688	126657
A0A0A0MSM0;Q92598;Q92598-2;Q92598-3;Q92598-4	HSPH1	Isoform of Q92598, Heat shock protein 105 kDa;Heat shock protein 105 kDa;Isoform of Q92598, Isoform Beta of Heat shock protein 105 kDa;Isoform of Q92598, Isoform 3 of Heat shock protein 105 kDa;Isoform of Q92598, Isoform 4 of Heat shock protein 105 kDa	8288.09	NaN	1662.17	NaN	5552.28	6480.52	6692.7	5719.65	6609.88	4149.82	2942.72	10174.4	2490.26	11099.9	7041.15	1655.46
O43719	HTATSF1	HIV Tat-specific factor 1	11384.3	13931	5600.25	11306.7	8236.04	13480.7	9803.25	13668.3	14769.7	12506.9	11137.2	7597.07	11540	17297.1	14677.5	13673.6
A0A087WTC8;L0R6P0;P86397	HTD2;RPP14;HTD2	Isoform of P86397, Hydroxyacyl-thioester dehydratase type 2, mitochondrial (Fragment);Isoform of P86397, Alternative protein RPP14;Hydroxyacyl-thioester dehydratase type 2, mitochondrial	NaN	NaN	38403	51337.6	NaN	39370.8	38632.2	NaN	44202.9	52531.4	NaN	77499.4	40019.7	NaN	NaN	40122.2
A0A0C4DG44;O43464;O43464-3	HTRA2	Isoform of O43464, Serine protease HTRA2, mitochondrial (Fragment);Serine protease HTRA2, mitochondrial;Isoform of O43464, Isoform 3 of Serine protease HTRA2, mitochondrial	28805.9	34701.4	23969.9	26256.1	28779.4	20809.6	14780.9	19673.5	18127	30841.7	27848	38902.7	22663.3	14700.4	21641.3	30722
Q7Z6Z7;Q7Z6Z7-2;Q7Z6Z7-3	HUWE1	E3 ubiquitin-protein ligase HUWE1;Isoform of Q7Z6Z7, Isoform 2 of E3 ubiquitin-protein ligase HUWE1;Isoform of Q7Z6Z7, Isoform 3 of E3 ubiquitin-protein ligase HUWE1	78242.5	57868.1	83520	65092.4	65966.9	155645	107665	3616.58	5438.63	68893.3	4533.42	5138.25	93754.1	5907.8	122782	60881.5
Q9Y4L1	HYOU1	Hypoxia up-regulated protein 1	15662.1	141524	9347.23	10078.1	23544.5	31733.1	137142	15358.3	17987	30109.2	10115	17235	18389.5	17315.3	12550.8	49479.4
Q9NX55	HYPK	Huntingtin-interacting protein K	14194.9	27775.2	18620.4	12449.8	12028.5	8030.81	7891.22	7002.63	5894.7	9891.04	8733.64	15132	10612.7	17320.2	6980.6	8959.85
Q2TAA2	IAH1	Isoamyl acetate-hydrolyzing esterase 1 homolog	105760	115211	116800	69838	85669.3	110437	101508	86245	122142	81541.2	102435	101088	101963	103331	97306	93837.5
A0A0A0MSX9;J3KR24;P41252	IARS	Isoform of P41252, Isoleucine--tRNA ligase, cytoplasmic;Isoform of P41252, Isoleucine--tRNA ligase, cytoplasmic;Isoleucine--tRNA ligase, cytoplasmic	NaN	NaN	NaN	NaN	12004.4	NaN	NaN	NaN	3381.66	2114.53	4415.92	NaN	905.948	NaN	NaN	4445.16
Q9NSE4	IARS2	Isoleucine--tRNA ligase, mitochondrial	41473	40699.2	54361.9	33353.8	37197.8	43002.9	29738	40306.9	53005.3	46646.6	36619.7	50040.8	44115.5	43986.9	42696.3	48539.3
Q5T440	IBA57	Putative transferase CAF17, mitochondrial	104239	54295.8	114578	54011.5	6543.36	77119.2	42893.5	45452.6	111505	48811.2	91477.7	11361.6	39449	19163.4	38854.1	47944.5
E7ESS4;P05362	ICAM1	Isoform of P05362, Intercellular adhesion molecule 1;Intercellular adhesion molecule 1	7448.16	6789.81	17946.2	10046.9	12227.7	14912.9	9500.73	7406.77	14062.7	18441.2	10060	12552.5	16656.8	22885.3	7321.81	16867.3
P14735	IDE	Insulin-degrading enzyme	73890.5	62891	85472.5	65479.2	75767.4	66136	50956.9	51274.2	69689.9	64685.5	48057.6	63452.2	62133.8	45247.3	46137.1	53618.9
O75874	IDH1	Isocitrate dehydrogenase [NADP] cytoplasmic	129348	152339	136190	148484	156711	165101	139635	121697	161776	148239	106868	162978	143994	116538	124018	132460
P48735	IDH2	Isocitrate dehydrogenase [NADP], mitochondrial	4.23644e+06	4.08851e+06	4.53444e+06	3.37395e+06	2.80722e+06	5.19626e+06	3.33511e+06	4.24867e+06	6.50293e+06	5.82702e+06	4692580	5.5779e+06	3.9839e+06	3.77517e+06	4.71747e+06	5.7154e+06
P50213	IDH3A	Isocitrate dehydrogenase [NAD] subunit alpha, mitochondrial	254053	191094	124772	176038	92068	153386	126451	216769	385946	243092	213681	258518	190139	189208	239062	271256
O43837-2	IDH3B	Isoform of O43837, Isoform A of Isocitrate dehydrogenase [NAD] subunit beta, mitochondrial	29437.8	28689.8	12995.7	16860	15705.3	24857.3	16264.1	21731.4	40061.3	31689.5	23565.1	40662.2	29404.2	25878.9	21005	31588.4
P51553	IDH3G	Isocitrate dehydrogenase [NAD] subunit gamma, mitochondrial	19277.4	16312.6	11888.6	11762.2	7418.51	10207.9	9569.03	14379.4	26912.6	23252.9	13589.5	27367.8	18374.4	11386.7	17607.1	20532.3
Q13907;Q13907-2	IDI1	Isopentenyl-diphosphate Delta-isomerase 1;Isoform of Q13907, Isoform 2 of Isopentenyl-diphosphate Delta-isomerase 1	46401.4	30768.4	64674.8	57836.2	87347.7	93077.2	55372.6	49114.3	48696.5	36731.2	64902.4	97181.1	79896.9	53183.5	55096.3	62901.8
Q9BXS1	IDI2	Isopentenyl-diphosphate delta-isomerase 2	68649	63735.7	113208	41453.9	74592.1	93161.5	72398.1	56170.1	65381.4	23181.3	48801.2	55013.4	51961.8	49212.9	45487	28200.3
Q16666;Q16666-2;Q16666-3;Q16666-6	IFI16	Gamma-interferon-inducible protein 16;Isoform of Q16666, Isoform 2 of Gamma-interferon-inducible protein 16;Isoform of Q16666, Isoform 3 of Gamma-interferon-inducible protein 16;Isoform of Q16666, Isoform 4 of Gamma-interferon-inducible protein 16	9916.48	7490.8	NaN	NaN	NaN	NaN	6017.74	8583.28	9160.63	13916.3	8585.26	NaN	11796.2	6327.01	8771.35	9765.45
Q01628	IFITM3	Interferon-induced transmembrane protein 3	475864	598778	504050	396704	821222	760980	406631	232072	624219	521742	105076	439409	572605	543890	343593	367213
P78318	IGBP1	Immunoglobulin-binding protein 1	3709.43	5718.11	NaN	NaN	2788.28	2834.14	5031.9	3752.46	5366.18	5336.32	5631.7	2069.15	3141.96	7797.83	5949.22	6036.26
P11717	IGF2R	Cation-independent mannose-6-phosphate receptor	NaN	NaN	7499.63	20259.8	NaN	4237.46	NaN	4995.99	4800.75	2310.67	1895.43	2360.61	7672.92	6589.26	NaN	2676.7
P35858;P35858-2	IGFALS	Insulin-like growth factor-binding protein complex acid labile subunit;Isoform of P35858, Isoform 2 of Insulin-like growth factor-binding protein complex acid labile subunit	4708.44	NaN	3176.31	NaN	3446.81	4471.43	NaN	NaN	2373.26	3190.74	3173.19	NaN	NaN	NaN	NaN	3055.6
P24593	IGFBP5	Insulin-like growth factor-binding protein 5	10897.5	13101	21584.5	6938.71	12372.2	NaN	NaN	12812	16690.3	NaN	NaN	13243.4	NaN	13928.2	NaN	NaN
Q16270;Q16270-2	IGFBP7	Insulin-like growth factor-binding protein 7;Isoform of Q16270, Isoform 2 of Insulin-like growth factor-binding protein 7	8148.12	3522.1	29305.9	NaN	23842.8	NaN	4914.12	52994.7	35893.5	51124.1	3423.24	21072.9	29527.7	40685	4750.72	9719.09
Q86VF2-5	IGFN1	Isoform of Q86VF2, Isoform 5 of Immunoglobulin-like and fibronectin type III domain-containing protein 1	20061.4	12435.3	NaN	NaN	NaN	NaN	2126.06	NaN	21241.1	8415.59	17891.4	7424.07	5589.11	8801	6514.26	NaN
A0A286YEY1;P01876	IGHA1	Isoform of P01876, Immunoglobulin heavy constant alpha 1 (Fragment);Immunoglobulin heavy constant alpha 1	1.59002e+06	1.48956e+06	840102	2.15439e+06	1.20299e+06	518915	1.1802e+06	350085	1.36231e+06	991332	569350	1.58966e+06	1.16277e+06	562513	1653074	670549
A0A0G2JMB2	IGHA2	Isoform of P01877, Immunoglobulin heavy constant alpha 2 (Fragment)	729924	656300	302400	886628	360249	241446	513022	163857	651123	419087	324449	637515	453924	312513	889708	357971
A0A0A0MS08;P01857	IGHG1	Isoform of P01857, Immunoglobulin heavy constant gamma 1 (Fragment);Immunoglobulin heavy constant gamma 1	4339677	6483008	3.79406e+06	5708631	5192043	2.57279e+06	2900625	1.77399e+06	3.74978e+06	3.42637e+06	3.08693e+06	4.57792e+06	5.75245e+06	2.68596e+06	5.45349e+06	3.2156e+06
A0A286YEY4;P01859	IGHG2	Isoform of P01859, Immunoglobulin heavy constant gamma 2 (Fragment);Immunoglobulin heavy constant gamma 2	1.20397e+06	1.41568e+06	885618	1.07811e+06	732499	589740	1.05531e+06	435973	953927	1134391	515379	918165	595826	523131	1.66177e+06	849984
A0A286YES1;P01860	IGHG3	Isoform of P01860, Immunoglobulin heavy constant gamma 3 (Fragment);Immunoglobulin heavy constant gamma 3	127935	354369	114180	157790	173973	94924.6	49498.1	51632	124731	248185	55553.8	116362	172355	67820.5	75929.9	106501
A0A286YFJ8;P01861	IGHG4	Isoform of P01861, Immunoglobulin heavy constant gamma 4 (Fragment);Immunoglobulin heavy constant gamma 4	179955	235909	56179.2	355356	122990	31961.7	485819	68682.2	154509	92016.4	32578.6	277522	118966	54614.1	550716	93037.7
A0A1B0GUU9;P01871;P01871-2	IGHM	Isoform of P01871, Immunoglobulin heavy constant mu (Fragment);Immunoglobulin heavy constant mu;Isoform of P01871, Isoform 2 of Immunoglobulin heavy constant mu	422793	249820	96647.9	128422	307790	86098.7	100126	38299.5	306199	136047	88304.4	125262	326338	141868	199138	129098
A0A0C4DH31;P23083	IGHV1-18;IGHV1-2	Immunoglobulin heavy variable 1-18;Immunoglobulin heavy variable 1-2	17106.1	32040.3	NaN	23086	16869.1	19879.6	13592.2	5531.83	13884.4	NaN	9351.01	25000.6	26152.2	10302.8	17051.6	25905.9
A0A0B4J2H0;A0A0C4DH29;P01742;P01743;P0DP01	IGHV1-69D;IGHV1-3;IGHV1-69;IGHV1-46;IGHV1-8	Immunoglobulin heavy variable 1-69D;Immunoglobulin heavy variable 1-3;Immunoglobulin heavy variable 1-69;Immunoglobulin heavy variable 1-46;Immunoglobulin heavy variable 1-8	3245.53	NaN	9921.86	14230.6	8532.03	9891.2	NaN	NaN	NaN	NaN	NaN	11466.3	15334.4	5684.52	12002.5	5112.32
P01780	IGHV3-7	Immunoglobulin heavy variable 3-7	111442	89047.1	62900.2	71069.2	82376.9	52310.5	58426.6	36803.5	79353.5	37838.5	55539.1	36483.8	47314.1	43456.7	64336.9	68727.1
A0A0C4DH38	IGHV5-51	Immunoglobulin heavy variable 5-51	58924.7	43953.8	51462.6	63330.6	42246.3	22659.7	27860.4	17119.9	36834.4	24683.6	24050.5	40910.4	27085.5	22903	34902.2	26404
P01834	IGKC	Immunoglobulin kappa constant	4617294	6.21233e+06	2.59133e+06	4633514	3.41132e+06	2.06759e+06	3360970	1.6406e+06	3.43864e+06	3.02512e+06	2.50235e+06	2.91739e+06	3.05292e+06	2.56092e+06	5063486	2.39231e+06
A0A0B4J2D9;P0DP09	IGKV1D-13;IGKV1-13	Immunoglobulin kappa variable 1D-13;Immunoglobulin kappa variable 1-13	NaN	NaN	NaN	62215.2	NaN	35190.1	32250	NaN	NaN	NaN	NaN	30270.8	NaN	44054.7	63743.9	NaN
P01593;P01594	IGKV1D-33;IGKV1-33	Immunoglobulin kappa variable 1D-33;Immunoglobulin kappa variable 1-33	135413	246266	150558	229526	157452	95939.9	132120	53932.2	127069	155975	86822.2	133790	104787	127693	145331	75601.4
A0A075B7D4;A0A0C4DH72;A0A0C4DH73;P01597;P01611;P04432	IGKV1OR2-108;IGKV1-6;IGKV1-12;IGKV1-39;IGKV1D-12;IGKV1D-39	Immunoglobulin kappa variable 1/OR2-108 (non-functional) (Fragment);Immunoglobulin kappa variable 1-6;Immunoglobulin kappa variable 1-12;Immunoglobulin kappa variable 1-39;Immunoglobulin kappa variable 1D-12;Immunoglobulin kappa variable 1D-39	NaN	28727.6	26876.6	NaN	24821.7	NaN	NaN	NaN	NaN	8280.48	NaN	8401.41	NaN	23279.7	28896.6	NaN
A0A075B6P5;P01615	IGKV2-28;IGKV2D-28	Immunoglobulin kappa variable 2-28;Immunoglobulin kappa variable 2D-28	49168.1	134198	84279.4	114300	62851.4	29892.9	57631.9	43767.8	61646.5	72768.7	82298.2	61703.5	57480	31892.4	98977.7	46970.1
P01619	IGKV3-20	Immunoglobulin kappa variable 3-20	231010	288157	80104.2	147485	133927	136792	154596	101354	164484	72989.5	116892	100389	130855	138359	215766	123720
P06312	IGKV4-1	Immunoglobulin kappa variable 4-1	21930.6	50712.2	9663.92	34234.5	11513.2	NaN	79979	NaN	NaN	NaN	NaN	9774.6	73585.8	10311.9	44246.8	NaN
P0DOY2;P0DOY3	IGLC2;IGLC3	Immunoglobulin lambda constant 2;Immunoglobulin lambda constant 3	1379380	1126638	1.02579e+06	1566755	1.4091e+06	542146	804644	452326	1.09658e+06	730749	686370	1.36657e+06	1.20321e+06	982431	1.53095e+06	921598
A0A0B4J231;B9A064	IGLL5	Isoform of B9A064, Immunoglobulin lambda-like polypeptide 5;Immunoglobulin lambda-like polypeptide 5	327727	361779	199460	481008	348391	76738.3	309263	62248.5	346282	127998	274689	251630	305450	130088	394548	115683
P01700	IGLV1-47	Immunoglobulin lambda variable 1-47	NaN	46561.7	6062.59	8096.06	8291.47	NaN	NaN	NaN	NaN	NaN	NaN	5638.17	34797.1	NaN	76786.2	NaN
P80748	IGLV3-21	Immunoglobulin lambda variable 3-21	106613	80345.2	53483.6	195811	77658.8	44402.3	48871.5	37736.4	73954.5	53110.4	49890.4	86445.4	73968.9	57525.8	89503.4	47659.8
P01717	IGLV3-25	Immunoglobulin lambda variable 3-25	8494.92	NaN	5534.09	10249.8	3407.55	NaN	NaN	NaN	NaN	NaN	NaN	9042.11	NaN	14721.4	NaN	NaN
Q14116;Q14116-2	IL18	Interleukin-18;Isoform of Q14116, Isoform 2 of Interleukin-18	NaN	15207.9	NaN	NaN	9723.67	13948.8	22389	NaN	NaN	NaN	NaN	11110.9	13640.8	15915.5	10384.5	5995.81
B4DY09;Q12905	ILF2	Isoform of Q12905, Interleukin enhancer-binding factor 2;Interleukin enhancer-binding factor 2	21274.6	30391.2	47051.5	3827.84	36210.9	20931.9	5801.98	13861.6	22881.1	8185.82	16479.3	18179.6	11570.3	17126	27894.2	24413.6
Q12906	ILF3	Interleukin enhancer-binding factor 3	71679.3	35750.6	76818.9	39287.3	69743.2	55035.1	43234.1	38823.9	64789.6	54781.8	42016.1	51215.7	55436.7	62017	75117.1	50208.4
Q12906-4;Q12906-6	ILF3	Isoform of Q12906, Isoform 4 of Interleukin enhancer-binding factor 3;Isoform of Q12906, Isoform 6 of Interleukin enhancer-binding factor 3	38532.5	29685.5	20797.8	NaN	NaN	31391.1	27951.8	33731.2	33985.1	17868.1	24738.4	18640.7	22177	35269.7	32170.9	26408.5
A0A0A0MTH3;Q13418	ILK	Isoform of Q13418, Integrin-linked protein kinase;Integrin-linked protein kinase	32722.4	9972.93	40296.6	26495.6	46953.8	10792.1	9202.5	8900.35	10037.9	9481.18	8990.07	33880.7	38246	27246.9	36608.1	11760.9
A1L0T0;M0R026	ILVBL	Acetolactate synthase-like protein;Isoform of A1L0T0, Acetolactate synthase-like protein	3822.34	NaN	6258.02	7864.23	6769.97	6374.09	5879.02	5777.15	17400.8	10940.8	5961.61	8409.37	8501.64	5891.57	4625.79	8846.77
C9J406	IMMT	Isoform of Q16891, MICOS complex subunit MIC60	82564.4	63127.8	29941.5	44799.7	31339.4	23568.4	54345.2	66956.8	85321.3	82000.7	53603.6	47577.9	51234.5	21370.5	58155.9	59371.6
H7C463	IMMT	Isoform of Q16891, MICOS complex subunit MIC60 (Fragment)	54932.7	40402.4	25838.2	22231	22812.1	29631.2	28279	38881.4	47020.4	37996.2	37129.8	30510.7	29492.1	22719.1	40851.5	43656.5
Q16891	IMMT	MICOS complex subunit MIC60	407333	282545	139576	208494	158476	228094	261871	438143	502597	298653	473498	286056	170958	193751	286396	339582
P29218;P29218-3	IMPA1	Inositol monophosphatase 1;Isoform of P29218, Isoform 3 of Inositol monophosphatase 1	175855	243951	223066	194394	201989	232181	171534	178376	212648	166908	124972	179410	222364	242320	183965	237674
O14732;O14732-2	IMPA2	Inositol monophosphatase 2;Isoform of O14732, Isoform 2 of Inositol monophosphatase 2	82314.8	76230	95922.2	58342.9	93491.5	117353	80382.3	49389.6	83523	74499.1	58243.2	97042.1	86088.5	76365.4	73782.5	51270.4
H0Y4R1	IMPDH2	Isoform of P12268, Inosine-5'-monophosphate dehydrogenase 2 (Fragment)	23558.6	22045.8	21422.2	24670.2	25317.9	23028.9	23522.5	18817.3	22465.9	25544.1	21956	23081.8	28372.3	21088.5	31371	28330.3
P49441	INPP1	Inositol polyphosphate 1-phosphatase	19082.7	NaN	20748.2	22279.5	21599.5	14226.5	NaN	17883.7	26907.4	29952.3	14141.9	16117.6	22633.6	16034.4	17286.4	21064.2
D6RJC3;E7EQN9;E9PCZ3;E9PHC0;O15327	INPP4B	Isoform of O15327, Type II inositol 3,4-bisphosphate 4-phosphatase (Fragment);Isoform of O15327, Type II inositol 3,4-bisphosphate 4-phosphatase;Isoform of O15327, Type II inositol 3,4-bisphosphate 4-phosphatase (Fragment);Isoform of O15327, Type II inositol 3,4-bisphosphate 4-phosphatase (Fragment);Type II inositol 3,4-bisphosphate 4-phosphatase	5591.19	NaN	NaN	NaN	5329.96	11303.6	12400.3	3471.59	4677.2	5681.75	NaN	NaN	6166.91	NaN	8730.17	4397.67
O00410;O00410-3	IPO5	Importin-5;Isoform of O00410, Isoform 3 of Importin-5	76649.8	58083.4	88518.1	85103.2	80065	61477.2	74505.2	68030.8	72793	85208.6	63409.3	73943.8	69848.7	52728.8	55762.3	58184.9
O95373	IPO7	Importin-7	23863.9	18810.8	18668.2	19717.9	22572.5	19217.8	17053.4	16266.9	22165.9	20278.1	17767.9	16262.6	19048.1	24055.3	17512.6	16778.5
P46940	IQGAP1	Ras GTPase-activating-like protein IQGAP1	15169.1	14221.4	25040	14285.8	15964.5	15374.1	10967.4	12139.3	17764.1	13476.1	14034.3	13923.1	15783.4	16481.1	17762.2	15477.9
Q8WZA9	IRGQ	Immunity-related GTPase family Q protein	12088.8	12898.5	16671.7	15119.3	17630	13366	10976.1	10438.9	18451	14879.9	12522.5	11085.6	15526	13178.9	15640.3	16858.2
Q86U28	ISCA2	Iron-sulfur cluster assembly 2 homolog, mitochondrial	57526.4	60483.1	81323.5	40214.2	45777.4	49457	31385.1	55294.4	52815.2	61477.8	64078.3	67078.2	64505.8	88655.8	54155.2	74639
B3KQ30;B4DNC9;F5H5N2;Q9H1K1;Q9H1K1-2	ISCU	Isoform of Q9H1K1, Iron-sulfur cluster assembly enzyme ISCU, mitochondrial;Isoform of Q9H1K1, Iron-sulfur cluster assembly enzyme ISCU, mitochondrial;Isoform of Q9H1K1, Iron-sulfur cluster assembly enzyme ISCU, mitochondrial;Iron-sulfur cluster assembly enzyme ISCU, mitochondrial;Isoform of Q9H1K1, Isoform 2 of Iron-sulfur cluster assembly enzyme ISCU, mitochondrial	35539.4	NaN	7205.39	NaN	4115.91	5993.3	4437.84	6540.7	7760.01	6729.53	6960.53	18960.7	7286.08	20829.8	4192.6	6040.95
H0YL90;H0YN67;O14498	ISLR	Isoform of O14498, Immunoglobulin superfamily-containing leucine-rich repeat protein (Fragment);Isoform of O14498, Immunoglobulin superfamily-containing leucine-rich repeat protein (Fragment);Immunoglobulin superfamily containing leucine-rich repeat protein	NaN	NaN	100356	58905.5	26426.6	36608.9	2.40257e+06	7057560	NaN	21486.9	NaN	20734.2	79342.5	NaN	69059.8	NaN
Q96CN7	ISOC1	Isochorismatase domain-containing protein 1	60947.3	82999	69342.2	58460.8	57270.2	78326.5	66315.7	45496.7	57929.5	54545.3	48079.6	63908.9	74754.7	46714.3	56975.2	50344.4
Q96AB3;Q96AB3-2	ISOC2	Isochorismatase domain-containing protein 2;Isoform of Q96AB3, Isoform 2 of Isochorismatase domain-containing protein 2	76990.4	68686.9	66479	84731	54437.5	83954.8	50012.5	64069.7	96604	72346.1	56209.9	83026.6	58623.5	42574	61678.9	68136.1
P53990;P53990-2;P53990-4;P53990-5	IST1	IST1 homolog;Isoform of P53990, Isoform 2 of IST1 homolog;Isoform of P53990, Isoform 4 of IST1 homolog;Isoform of P53990, Isoform 5 of IST1 homolog	11398.9	10685.9	9907.58	NaN	NaN	13556.4	8853.61	12479.6	13680.2	10152.5	10636.5	6623.41	9669.02	10036.5	11187.3	18770.1
Q9NPH2;Q9NPH2-2;Q9NPH2-3	ISYNA1	Inositol-3-phosphate synthase 1;Isoform of Q9NPH2, Isoform 2 of Inositol-3-phosphate synthase 1;Isoform of Q9NPH2, Isoform 3 of Inositol-3-phosphate synthase 1	80913.9	9036.48	24035.3	7699.87	15612.6	17543.1	12529.3	6538.64	21052.5	19042.2	16515	15655.7	16886.8	23661.6	8176.88	13019.2
P56199	ITGA1	Integrin alpha-1	NaN	44654.2	5554.24	32534.9	NaN	3053.67	NaN	2656.48	13958.4	4802.36	2144.31	2513.87	14880.6	NaN	13434.2	4574.2
P23229-2;P23229-4;P23229-6;P23229-9	ITGA6	Isoform of P23229, Isoform Alpha-6X1A of Integrin alpha-6;Isoform of P23229, Isoform Alpha-6X2A of Integrin alpha-6;Isoform of P23229, Isoform Alpha-6X1X2A of Integrin alpha-6;Isoform of P23229, Isoform 9 of Integrin alpha-6	8598.58	9301.83	9952.98	NaN	NaN	11614.1	6409.41	NaN	15073.9	NaN	5289.1	839.438	NaN	14356.7	10455.6	5806.11
J3KNV4;Q13683;Q13683-3;Q13683-7;Q13683-9	ITGA7	Isoform of Q13683, Integrin alpha-7;Integrin alpha-7;Isoform of Q13683, Isoform Alpha-7X1B of Integrin alpha-7;Isoform of Q13683, Isoform Alpha-7X2B of Integrin alpha-7;Isoform of Q13683, Isoform Alpha-7X2DB of Integrin alpha-7	59006.1	74239.2	66180.3	79823.6	97610.6	66931.2	45016.3	32724.5	58157.2	67155.4	43459.8	105635	65108.3	57273	66501.5	52638.4
P06756;P06756-2;P06756-3	ITGAV	Integrin alpha-V;Isoform of P06756, Isoform 2 of Integrin alpha-V;Isoform of P06756, Isoform 3 of Integrin alpha-V	NaN	NaN	NaN	NaN	4920.79	5265.1	NaN	2713.1	7108.7	NaN	NaN	NaN	9658.82	8888.56	NaN	7992.33
P05556	ITGB1	Integrin beta-1	51936.3	61045.7	46040.8	44630.3	54156.3	55990.2	38436.2	41047	61985.2	54549.7	41016	52201.2	60856.9	86423.3	59645.1	48527.9
Q9UKP3;Q9UKP3-2	ITGB1BP2	Integrin beta-1-binding protein 2;Isoform of Q9UKP3, Isoform 2 of Integrin beta-1-binding protein 2	22444.1	32287	42387.6	28504.7	41787.8	32383.6	28517.1	18928.1	21408.1	41547	12179.7	30911.2	31166.6	15455.2	22309.8	44290.1
P05107	ITGB2	Integrin beta-2	NaN	5489.67	2818.96	2681.6	NaN	3178.19	NaN	NaN	4202.24	5121.61	3755.83	NaN	3979.89	NaN	NaN	NaN
P05106	ITGB3	Integrin beta-3	NaN	10416.4	11994.3	19614.3	8156.98	NaN	7399.58	4149.72	9737.02	NaN	11546.4	12323.3	13039.4	7707.42	9121.2	NaN
A0A087WXP3;E9PEE8;P18564;P18564-2	ITGB6	Isoform of P18564, Integrin beta;Isoform of P18564, Integrin beta;Integrin beta-6;Isoform of P18564, Isoform 2 of Integrin beta-6	15936.7	19529.6	17699.9	13376.9	14362.7	19081.8	14493.4	17703.8	24723.3	16201.8	20787.1	22136.2	21428.3	41408.5	25143.4	15275
P19827	ITIH1	Inter-alpha-trypsin inhibitor heavy chain H1	20125.5	17943.6	8747.3	22906.3	15425.7	18074.2	10616	5476.04	15235.4	14468.4	13333.2	16955.6	17817.2	18871.2	22549.6	24414
P19823;Q5T985	ITIH2	Inter-alpha-trypsin inhibitor heavy chain H2;Isoform of P19823, Inter-alpha-trypsin inhibitor heavy chain H2	64394.6	80299.4	52852	107860	68536.2	54781.5	42085.4	29792	49570.5	47896.9	38365.7	48465.2	64440.9	41338.7	66689.6	62830.4
B7ZKJ8;Q14624;Q14624-2;Q14624-3	ITIH4	Isoform of Q14624, ITIH4 protein;Inter-alpha-trypsin inhibitor heavy chain H4;Isoform of Q14624, Isoform 2 of Inter-alpha-trypsin inhibitor heavy chain H4;Isoform of Q14624, Isoform 3 of Inter-alpha-trypsin inhibitor heavy chain H4	24900.8	27797.5	20166	41793.4	28470.5	18870.2	16910.9	13599.7	15050.4	21003.8	23146	22133.2	29677.4	19108	28261.8	23488.2
Q9BY32	ITPA	Inosine triphosphate pyrophosphatase	60615.3	1971.82	170725	182943	159591	1151.08	3885.91	61437.3	41344.4	40532.1	2505.89	202490	41688.6	37295.2	45563.9	4574.16
A0A0A0MT83;P26440	IVD	Isoform of P26440, Isovaleryl-CoA dehydrogenase, mitochondrial;Isovaleryl-CoA dehydrogenase, mitochondrial	15049.3	24989.2	45121.7	37138	31075.3	51529.2	38521.6	39438.3	13277.9	7634.76	54409.4	33178.5	37878.9	30716.6	65919	37963.1
C9JA05;D6RD17;D6RHJ6;P01591	JCHAIN	Isoform of P01591, Immunoglobulin J chain (Fragment);Isoform of P01591, Immunoglobulin J chain (Fragment);Isoform of P01591, Immunoglobulin J chain (Fragment);Immunoglobulin J chain	70922.8	45608.3	13029.6	72310.5	38114	23142.7	38581.4	10615.8	49026.4	29029.7	22275	27679.2	46979	53628.5	43455.6	23071.8
Q9HDC5	JPH1	Junctophilin-1	161701	159736	160336	180544	170236	129889	146257	152316	155711	140269	121520	145255	168399	170833	151676	181188
Q9BR39	JPH2	Junctophilin-2	63231.5	75017.6	73113.1	69647.8	79662.9	84325.4	79002.9	63988.6	84113.6	81154.7	51555	65569.7	90839.5	93924.6	73659	79682.5
Q9UK76	JPT1	Jupiter microtubule associated homolog 1	71275.6	96856.1	83648.1	87026.1	89448.9	98387.6	95984.5	50575.5	76480.2	70333.3	56573.2	83442.1	73186.6	206168	72077.8	53216.9
A6NGP5;H3BU16;Q9H910;Q9H910-2;Q9H910-3	JPT2	Isoform of Q9H910, Jupiter microtubule-associated homolog 2;Isoform of Q9H910, Jupiter microtubule-associated homolog 2 (Fragment);Jupiter microtubule associated homolog 2;Isoform of Q9H910, Isoform 2 of Jupiter microtubule associated homolog 2;Isoform of Q9H910, Isoform 3 of Jupiter microtubule associated homolog 2	18156.2	23210.8	18016.6	21762	16631.8	32571.9	20917.9	23604.5	21379.4	22258.8	14792.4	18231.4	25008	41133.7	11279	13614.9
Q96MG2	JSRP1	Junctional sarcoplasmic reticulum protein 1	337919	155791	242894	260371	376731	598762	387329	410997	453274	301146	310612	229950	434672	744438	327566	377826
P14923	JUP	Junction plakoglobin	45865.5	14853.3	14675.6	37752.1	14426.7	33189.7	21286.8	20371	19891.2	17794.6	13819.6	13066.1	23114.8	NaN	19123.4	2630.94
Q63ZY3;Q63ZY3-3	KANK2	KN motif and ankyrin repeat domain-containing protein 2;Isoform of Q63ZY3, Isoform 3 of KN motif and ankyrin repeat domain-containing protein 2	NaN	2418.3	NaN	NaN	NaN	5276.31	NaN	NaN	6434.67	4648.86	NaN	9107.91	6006.54	165126	4338.19	3872.24
Q6NY19;Q6NY19-2	KANK3	KN motif and ankyrin repeat domain-containing protein 3;Isoform of Q6NY19, Isoform 2 of KN motif and ankyrin repeat domain-containing protein 3	8346.89	8798.13	10436.3	5447.77	8863.47	9674.76	6387.19	7612.66	9604.76	9004.58	5984.94	6868.56	8062.59	8176.71	7563.15	7924.45
Q15046	KARS	Lysine--tRNA ligase	9854.31	42631.1	27007.8	20368.5	18168.8	13879.1	15401.2	15469.2	14275.7	19810.9	18904	23376.4	21244.1	18214.4	22765.1	16508.9
K7EIJ8;K7EM02;Q8IYT4;Q8IYT4-2	KATNAL2	Isoform of Q8IYT4, Katanin p60 ATPase-containing subunit A-like 2 (Fragment);Isoform of Q8IYT4, Katanin p60 ATPase-containing subunit A-like 2 (Fragment);Katanin p60 ATPase-containing subunit A-like 2;Isoform of Q8IYT4, Isoform 2 of Katanin p60 ATPase-containing subunit A-like 2	67529.2	75689.5	56497	NaN	66873.5	NaN	NaN	70292.2	NaN	58869.7	87450.6	72298.5	54643.8	101083	NaN	72056
Q9P0J7	KCMF1	E3 ubiquitin-protein ligase KCMF1	NaN	NaN	NaN	2380.26	5188.92	2359.04	5110.39	NaN	NaN	1808.04	2517.66	925.326	2183.41	NaN	9323.55	989.713
Q14654	KCNJ11	ATP-sensitive inward rectifier potassium channel 11	NaN	NaN	NaN	NaN	NaN	NaN	NaN	6177.47	NaN	NaN	NaN	NaN	24205.3	NaN	NaN	NaN
Q96CX2	KCTD12	BTB/POZ domain-containing protein KCTD12	78529.8	46778.3	65817.2	57422.8	65072.6	61246.4	43063.4	45922.6	85753.2	28607.6	47711.1	62496.7	39359.7	58903.2	56262.2	61762.6
K7ERC8;Q06136	KDSR	Isoform of Q06136, 3-ketodihydrosphingosine reductase (Fragment);3-ketodihydrosphingosine reductase	6623.95	NaN	NaN	NaN	NaN	NaN	4526.45	NaN	NaN	NaN	5055.93	NaN	5162.06	NaN	NaN	NaN
Q07666;Q07666-2	KHDRBS1	KH domain-containing, RNA-binding, signal transduction-associated protein 1;Isoform of Q07666, Isoform 2 of KH domain-containing, RNA-binding, signal transduction-associated protein 1	16187	8743.34	7615.27	26737.4	31303.7	10311.5	11134.2	11718.1	13690.3	14366.9	8835.03	4706.39	16737.1	22623.2	19192.3	13353.6
A0A087WTP3;Q92945	KHSRP	Isoform of Q92945, Far upstream element-binding protein 2;Far upstream element-binding protein 2	18862.5	14785.2	35661.2	18610.5	33299.1	26571.3	12266.2	14538.1	23003.5	24564	14470.6	27021.5	32023.8	36068.8	22960.3	19113.2
Q96AT1	KIAA1143	Uncharacterized protein KIAA1143	NaN	6863.99	NaN	NaN	NaN	8804.96	5743.85	NaN	9172.36	5794.64	NaN	NaN	6665.91	12338.4	6417.25	NaN
Q5T5P2;Q5T5P2-3	KIAA1217	Sickle tail protein homolog;Isoform of Q5T5P2, Isoform 3 of Sickle tail protein homolog	NaN	NaN	6859.52	5846.96	8576.45	NaN	4212.68	3592.3	13235.2	4405.86	NaN	NaN	4480.69	6190.61	3763.9	2916.83
A0A1B0GVJ7	KIAA1671	Isoform of Q9BY89, Uncharacterized protein KIAA1671	NaN	NaN	3264.4	5308.16	9029.35	11487	4743.21	NaN	NaN	NaN	NaN	6940.29	5082.9	16742.9	NaN	4036.02
C9JKA9;Q9NS87;Q9NS87-2;Q9NS87-3;Q9NS87-4	KIF15	Isoform of Q9NS87, Kinesin-like protein KIF15;Kinesin-like protein KIF15;Isoform of Q9NS87, Isoform 2 of Kinesin-like protein KIF15;Isoform of Q9NS87, Isoform 3 of Kinesin-like protein KIF15;Isoform of Q9NS87, Isoform 4 of Kinesin-like protein KIF15	92109.3	115907	96486.3	110350	123669	131435	93749.2	113216	151605	128955	111841	177712	196183	215897	135059	180340
P33176	KIF5B	Kinesin-1 heavy chain	38507.5	6320.46	20171.5	25007.4	23237.7	21984.2	21060.4	22994.9	28671.3	12520	20335.1	23949.1	27417.9	28441.5	23826.3	24016.7
Q9NSK0;Q9NSK0-3;Q9NSK0-5	KLC4	Kinesin light chain 4;Isoform of Q9NSK0, Isoform 3 of Kinesin light chain 4;Isoform of Q9NSK0, Isoform 5 of Kinesin light chain 4	NaN	NaN	14739.2	NaN	NaN	NaN	5064.63	7208.51	8316.89	13323.5	NaN	NaN	20147.7	NaN	6386.67	5153.02
Q9H511	KLHL31	Kelch-like protein 31	7300.41	NaN	7432.85	5733.48	9831.78	11658.6	4405.6	10149.8	10452.3	9673.99	12857.6	8644.08	9417.18	13145.8	16996.1	14001.3
Q2TBA0	KLHL40	Kelch-like protein 40	267971	382390	333138	336354	395814	476138	407323	389418	252550	362003	305351	266964	487037	311432	351865	343655
O60662	KLHL41	Kelch-like protein 41	1128422	1.22966e+06	1.38864e+06	1.53689e+06	1.9588e+06	1.88793e+06	1.90138e+06	1.49253e+06	1.53579e+06	1.67811e+06	1.35454e+06	1540406	2.32051e+06	1333995	1833426	2.07415e+06
H0YAC1;P03952	KLKB1	Isoform of P03952, Plasma kallikrein (Fragment);Plasma kallikrein	5207.11	NaN	NaN	12513.3	NaN	NaN	3503.01	NaN	NaN	NaN	NaN	NaN	NaN	NaN	3425.45	4435.68
P01042;P01042-2	KNG1	Kininogen-1;Isoform of P01042, Isoform LMW of Kininogen-1	51313.1	47575.1	29517.3	41300	35296.2	31294.3	29962.5	24279.6	38291.3	27416	35591.8	33474.3	33680.1	42281.9	43882.8	27534.1
P52294	KPNA1	Importin subunit alpha-5	13877.1	16954.7	15861.1	25780.5	10707	18396.3	14325.1	13623.2	13348.2	10793.7	8263.64	18003	11141.8	14152.7	9825.53	15001.7
O00505	KPNA3	Importin subunit alpha-4	113351	97242.3	132328	110149	156054	127502	146874	125092	115665	124093	105129	110286	144371	109451	115688	131913
O00629	KPNA4	Importin subunit alpha-3	35174.2	24539.8	22855.3	24040.4	26371.5	19653.2	18641.5	10850.5	20083.7	17899.7	14372.4	14537.2	19885.7	40532.7	19408.3	15145.1
O60684	KPNA6	Importin subunit alpha-7	23535.4	NaN	46440.6	19186.9	26954.9	16025.1	14333.6	8507.87	16818	14573.7	11754.4	25132.4	16954	8763.06	15831.1	15973.8
Q14974	KPNB1	Importin subunit beta-1	113157	96617.4	125187	133492	126546	96009.2	88281.5	86283.7	112616	94962.4	81974.5	114127	127817	121119	110843	103225
P01116;P01116-2	KRAS	GTPase KRas;Isoform of P01116, Isoform 2B of GTPase KRas	41878.9	33329.8	NaN	24426.4	NaN	NaN	NaN	18303	26415.6	NaN	23002.5	NaN	NaN	27850.5	28086.7	NaN
P04264	KRT1	Keratin, type II cytoskeletal 1	14928.1	11895.6	15786.9	50551.3	31086.6	32218.7	40952.1	19101.8	18346.2	25087.5	33445.5	20210.7	10071.9	23163.8	21910	24365.6
P13645	KRT10	Keratin, type I cytoskeletal 10	14804.4	NaN	28158	NaN	NaN	NaN	45293.5	40178.1	8573.52	NaN	10316.7	NaN	NaN	3379.36	11031.8	2454.31
P02533	KRT14	Keratin, type I cytoskeletal 14	47545.5	8392.9	8708.9	27952	32907.7	168256	89579.8	19574.8	140548	8098.31	7759.28	45379.1	36953.4	10321.6	12264.1	21982.2
P35908	KRT2	Keratin, type II cytoskeletal 2 epidermal	18866.9	NaN	17694.6	29449.3	24770.1	33304.5	51633.7	13627.6	28620.8	25599.5	27053.7	23926.7	29082	39760.5	19141	19300.9
F8W1S1;Q14CN4;Q14CN4-2;Q14CN4-3;Q3SY84;Q7RTS7	KRT74;KRT72;KRT72;KRT72;KRT71;KRT74	Isoform of Q7RTS7, Keratin, type II cytoskeletal 74;Keratin, type II cytoskeletal 72;Isoform of Q14CN4, Isoform 2 of Keratin, type II cytoskeletal 72;Isoform of Q14CN4, Isoform 3 of Keratin, type II cytoskeletal 72;Keratin, type II cytoskeletal 71;Keratin, type II cytoskeletal 74	NaN	NaN	NaN	10027.7	NaN	NaN	NaN	NaN	NaN	NaN	NaN	17540.6	NaN	64968.6	NaN	NaN
P05787;P05787-2	KRT8	Keratin, type II cytoskeletal 8;Isoform of P05787, Isoform 2 of Keratin, type II cytoskeletal 8	178402	146531	3037454	240674	175265	168186	145691	16538	183062	143066	137860	171088	156667	86547.8	134297	143233
P35527	KRT9	Keratin, type I cytoskeletal 9	8637.42	9543.72	8518.33	10458.8	8723.68	20888.9	9829.35	9803.06	8745.26	16421.6	22879.4	8135.95	9084.02	13335.6	14964.4	18080.2
Q86UP2;Q86UP2-4	KTN1	Kinectin;Isoform of Q86UP2, Isoform 4 of Kinectin	17674.3	16144.3	15370.2	9467.48	14864.5	10692.8	10006.6	14100.8	17593.2	13365.4	12809.9	14932.1	17494.4	27411.5	16185.9	17979.5
B7Z4W5;Q16773	KYAT1	Isoform of Q16773, Cysteine conjugate-beta lyase cytoplasmic (Glutamine transaminase K, kyneurenine aminotransferase), isoform CRA_b;Kynurenine--oxoglutarate transaminase 1	NaN	44488.7	32306.7	41401.6	40966.3	17233.3	12412.1	12101.7	16059.6	72006	5589.46	32693.2	80644.9	31696.7	11634.8	9477.61
A0A0A0MRN7;Q6YP21;Q6YP21-3	KYAT3	Isoform of Q6YP21, Kynurenine--oxoglutarate transaminase 3 (Fragment);Kynurenine--oxoglutarate transaminase 3;Isoform of Q6YP21, Isoform 3 of Kynurenine--oxoglutarate transaminase 3	NaN	NaN	9754.1	NaN	10525.6	11256.1	7828.64	12836.9	13597	NaN	NaN	20458.1	11504.8	13184.5	14094.9	15734.6
Q9H9P8	L2HGDH	L-2-hydroxyglutarate dehydrogenase, mitochondrial	53977	24052	50874.3	48833.2	36649.6	66455.4	43938.4	57801.4	73675.4	49640.1	45471.5	52990.7	54046.6	40307.6	43061.2	62883.8
Q96EM0	L3HYPDH	Trans-3-hydroxy-L-proline dehydratase	5480.99	NaN	3873.38	2279.26	5037.1	7380.96	9330.91	NaN	8655.99	1817.14	NaN	2892.73	6239.86	13180.3	7338.02	5887.57
P83111	LACTB	Serine beta-lactamase-like protein LACTB, mitochondrial	133175	105004	135802	128803	128259	119078	104982	146307	155758	121273	119343	146342	142659	86905	111263	165333
Q53H82	LACTB2	Endoribonuclease LACTB2	14672.9	15180.7	8705.71	6489.8	7766.51	8078.77	11500.6	6619.78	7741.28	11551.6	12741.2	12165.7	9112.18	10327.7	6265.06	7150.4
Q14657	LAGE3	EKC/KEOPS complex subunit LAGE3	7021.27	24027.4	23135.5	5109.96	18880.4	17087.2	7603.5	11513.8	18000.5	16454.1	13542.2	21445.6	19981.2	14648	11365.1	15750.4
A0A087WX80;A0A087WYF1;P24043	LAMA2	Isoform of P24043, Laminin subunit alpha-2;Isoform of P24043, Laminin subunit alpha-2;Laminin subunit alpha-2	50776.1	58229.3	60589.6	56661.7	67284.2	59151.9	67704.5	52368	43588.3	51448.4	36631.4	58617.3	52056.1	55183.1	69809.8	67457.7
A0A0A0MQS9;A0A0A0MTC7;Q16363;Q16363-2	LAMA4	Isoform of Q16363, Laminin subunit alpha-4;Isoform of Q16363, Laminin subunit alpha-4;Laminin subunit alpha-4;Isoform of Q16363, Isoform 2 of Laminin subunit alpha-4	14065.7	6466.68	15791.8	11093	10939.7	10383.4	12023.3	9566.06	17006.5	14043.1	12883.5	15798.9	23600.8	16377.3	18946.5	17755.6
O15230	LAMA5	Laminin subunit alpha-5	6258.53	451060	8552.23	6252.47	9181.84	8711.21	9871.99	6606.46	9553.53	6857.36	6386.87	8000.52	9085.07	7006.22	9010.72	7909.16
G3XAI2;P07942	LAMB1	Isoform of P07942, Laminin subunit beta-1;Laminin subunit beta-1	65263.1	94064.9	94254.4	87499.6	87312	87869.7	95111	112124	71516.2	87425.2	55678.5	71334.2	92482	93206	92412.2	116616
P55268	LAMB2	Laminin subunit beta-2	70193.3	48826.1	96540.6	81205.8	122074	50863.6	52773.8	40026	50745.3	78648.5	51238.4	100181	102119	54775.1	71748.4	36024.9
P11047	LAMC1	Laminin subunit gamma-1	101704	95864.2	96043.7	88040.3	94946.4	84559.1	91049.1	86259.3	80965.7	71263.8	70168.5	70925.3	78574.5	90221.6	107949	84137.8
P11279	LAMP1	Lysosome-associated membrane glycoprotein 1	231967	389730	849066	456738	486276	321316	6868.8	335295	10777.6	640759	9672.14	792448	483646	19696	16172.8	413514
P13473;P13473-2;P13473-3	LAMP2	Lysosome-associated membrane glycoprotein 2;Isoform of P13473, Isoform LAMP-2B of Lysosome-associated membrane glycoprotein 2;Isoform of P13473, Isoform LAMP-2C of Lysosome-associated membrane glycoprotein 2	51712.3	46337.2	83317.5	55904.5	72802.8	62340.9	56379.2	49325.7	60256.7	63584.9	53005.7	68490.4	81428.8	119890	79719.5	55598.4
Q6IAA8	LAMTOR1	Ragulator complex protein LAMTOR1	63461.8	29025.4	29993.6	53881.9	34558.9	27428.6	37474.4	14674.9	40289.6	28115.4	25955.6	19073.4	41443.7	62297.9	22163.7	46895.5
Q9UHA4	LAMTOR3	Ragulator complex protein LAMTOR3	NaN	NaN	61627.4	NaN	9157.81	NaN	1853.56	1173.72	14917.7	NaN	NaN	7303.11	1906.92	NaN	1769.98	NaN
A0A0C4DGV4;O43504	LAMTOR5	Isoform of O43504, Hepatitis B virus x interacting protein;Ragulator complex protein LAMTOR5	74575.5	69461.8	103807	65736.2	79380.5	78977.5	52844.9	50324.4	84116.3	78289.6	53547.6	96109.1	77178.1	102986	56479.4	56900.8
O43813	LANCL1	LanC-like protein 1	257838	307559	310307	194845	301023	331881	271062	245654	266015	262237	188403	287798	262171	199734	259434	261161
Q9NS86	LANCL2	LanC-like protein 2	17928.1	20000.1	29460.9	21341.3	30207.5	24316.7	20036.2	16122.7	17161.7	20722.8	12761.2	16399.7	25831.8	14715.7	15263.3	20067.5
P28838;P28838-2	LAP3	Cytosol aminopeptidase;Isoform of P28838, Isoform 2 of Cytosol aminopeptidase	113184	89822.9	156300	120619	143746	102834	99356.2	80441.9	124009	124769	113529	163986	167295	110393	125797	136165
Q6PKG0	LARP1	La-related protein 1	NaN	NaN	NaN	NaN	NaN	NaN	7967.98	84379.4	673.411	12770.9	32589.9	1869.79	19441.3	76434.5	40576.4	15085.2
Q9P2J5;Q9P2J5-2	LARS	Leucine--tRNA ligase, cytoplasmic;Isoform of Q9P2J5, Isoform 2 of Leucine--tRNA ligase, cytoplasmic	NaN	NaN	4585	14100.2	5831.66	294736	4176.98	252468	4383.73	6110.2	NaN	10454.7	10468.1	NaN	8039.04	156340
E9PHM2;Q15031	LARS2	Isoform of Q15031, Probable leucine--tRNA ligase, mitochondrial;Probable leucine--tRNA ligase, mitochondrial	NaN	NaN	4291.61	NaN	NaN	5069.4	28805.9	28652.8	11128.9	63806.1	NaN	9033.83	NaN	NaN	NaN	7459.21
Q14847	LASP1	LIM and SH3 domain protein 1	82594.3	81839.8	89755.9	80818.6	85093.9	79211.8	63925.5	70559	127012	81072.5	71891.8	95672.5	90609.3	160250	114002	100095
Q9UIC8;Q9UIC8-2	LCMT1	Leucine carboxyl methyltransferase 1;Isoform of Q9UIC8, Isoform 2 of Leucine carboxyl methyltransferase 1	35552.7	37447.1	47571.8	32995.8	35069.5	41061.3	30577.6	28352.9	36520.1	32724.7	29687.4	30274.6	38223.1	35318.1	33203.5	33441.9
P13796	LCP1	Plastin-2	24096.3	NaN	10557.2	127778	1075.6	58855.3	52979	4310.7	81484.5	71233.1	4379.55	58070.2	9829.92	50283.9	6925.05	61454.2
O75112-2	LDB3	Isoform of O75112, Isoform 2 of LIM domain-binding protein 3	7.77775e+06	8144131	8.13552e+06	8260017	9312507	9480364	8543585	7.7294e+06	7.65282e+06	8664522	6973176	6.55577e+06	8537858	10118655	7133012	6.9437e+06
O75112-5	LDB3	Isoform of O75112, Isoform 5 of LIM domain-binding protein 3	375241	442351	746067	819171	750478	376377	570529	555268	320724	845725	612965	876396	862789	326037	425347	542485
P00338;P00338-3	LDHA	L-lactate dehydrogenase A chain;Isoform of P00338, Isoform 3 of L-lactate dehydrogenase A chain	2.07893e+06	2.97594e+06	2.67699e+06	3.30291e+06	6057193	2.03618e+06	5654472	2413190	3287107	4.46601e+06	1.97815e+06	3.02023e+06	6054964	1.45934e+06	4.73045e+06	3.73177e+06
P07195	LDHB	L-lactate dehydrogenase B chain	575091	1.09883e+06	786676	435714	747493	748629	687975	530996	781001	829012	581203	615577	628094	452131	769107	549379
Q86WU2;Q86WU2-2	LDHD	Probable D-lactate dehydrogenase, mitochondrial;Isoform of Q86WU2, Isoform 2 of Probable D-lactate dehydrogenase, mitochondrial	23646.9	7044.37	15083.2	63258.7	28172.9	75072	29089.1	41746.2	23124.4	29861.6	46677.3	28423.4	44311.2	47495.2	35212.6	59292.1
Q8NC56	LEMD2	LEM domain-containing protein 2	13846.6	23805	19033.2	15195.3	22708.6	15091.8	14924.3	13352	8992.24	10250.3	9622.14	7596.64	12119.9	13427.7	16325.9	11959.1
O95202	LETM1	Mitochondrial proton/calcium exchanger protein	38492.8	36449.6	22730	21195.8	22144.9	48274.1	16708.1	32475.6	49586.7	48528.8	39000.9	39244.6	26706.1	49138.3	41287.7	48221.2
P09382	LGALS1	Galectin-1	2484489	2.00264e+06	2.82492e+06	2.6091e+06	2.74538e+06	3.09859e+06	2627505	1.54137e+06	2780542	2.08961e+06	1.78005e+06	2814852	3.10289e+06	3.92583e+06	3.79277e+06	2.06771e+06
P17931	LGALS3	Galectin-3	22988.2	17777.8	13511.7	13439.7	10223.2	15172.8	10211.6	16054.3	24807.1	19198.6	15388.1	16537.7	18822.4	56421.5	37933.6	22132.8
Q08380	LGALS3BP	Galectin-3-binding protein	13049.1	5043.04	5650.83	2555.04	4797	NaN	NaN	4174.49	15483.5	NaN	12689.3	10009.4	16055.8	20962.9	8381.19	6394.48
Q3ZCW2	LGALSL	Galectin-related protein	18606.3	43273.8	17235.3	20351.7	22640.7	33990.8	18609.2	25534.2	19287.6	18561.3	22398.8	15503.5	17341	37503.9	11841.2	25182.6
Q9H008	LHPP	Phospholysine phosphohistidine inorganic pyrophosphate phosphatase	4548.67	43690.7	29114.3	20726.8	20588.5	24833.6	12151.5	13096.4	3821.71	20779	6384.36	28805.5	16878.6	24223.6	28921.1	3554.27
F8VQE1;Q9UHB6;Q9UHB6-2;Q9UHB6-4;Q9UHB6-5	LIMA1	Isoform of Q9UHB6, LIM domain and actin-binding protein 1;LIM domain and actin-binding protein 1;Isoform of Q9UHB6, Isoform Alpha of LIM domain and actin-binding protein 1;Isoform of Q9UHB6, Isoform 4 of LIM domain and actin-binding protein 1;Isoform of Q9UHB6, Isoform 5 of LIM domain and actin-binding protein 1	NaN	NaN	1073.34	1507.6	NaN	16245.8	1920.7	NaN	5131.79	1988.49	4450.31	NaN	3962.17	8737.1	NaN	23089.2
G5EA03;Q9UPQ0-3	LIMCH1	Isoform of Q9UPQ0, LIM and calponin homology domains-containing protein 1;Isoform of Q9UPQ0, Isoform 3 of LIM and calponin homology domains-containing protein 1	22957.5	14756.1	7106.1	10467.9	10515.7	17187	7769.96	16083.6	23359	9876.06	8628.75	7858.02	10144	21891.3	24630.7	16656.4
Q9UPQ0	LIMCH1	LIM and calponin homology domains-containing protein 1	33381.1	25505.1	21411.4	18845.9	28646.5	23131.2	19261	20621.2	29280.6	20541.1	18116.8	14588.1	26518	35619.5	36897.3	25728.1
C9JRJ5;Q9UGP4	LIMD1	Isoform of Q9UGP4, LIM domain-containing protein 1;LIM domain-containing protein 1	3545.46	NaN	NaN	3743.03	3482.59	5142.77	3503.07	NaN	3608.49	4215.99	3397.42	2498.11	3668.46	4467.24	3345.44	4067.92
A0A0J9YXC7;P48059;P48059-2;P48059-3;P48059-4;P48059-5	LIMS4;LIMS1;LIMS1;LIMS1;LIMS1;LIMS1	Isoform of P0CW19, LIM and senescent cell antigen-like-containing domain protein;LIM and senescent cell antigen-like-containing domain protein 1;Isoform of P48059, Isoform 2 of LIM and senescent cell antigen-like-containing domain protein 1;Isoform of P48059, Isoform 3 of LIM and senescent cell antigen-like-containing domain protein 1;Isoform of P48059, Isoform 4 of LIM and senescent cell antigen…	NaN	20836.3	9349.23	11061.2	8797.87	NaN	7739.92	13288.6	21876.5	6755.04	10259.2	8199.17	4091.72	NaN	6622.99	8936.37
G3V1D4;Q9NUP9	LIN7C	Isoform of Q9NUP9, Lin-7 homolog C (C. elegans), isoform CRA_b;Protein lin-7 homolog C	NaN	2300.66	1880.82	3542.13	NaN	NaN	NaN	1653.71	NaN	NaN	NaN	3367.25	4088.02	2676.2	1509.56	NaN
P49257	LMAN1	Protein ERGIC-53	19417.2	19983.3	15870.6	19928.6	15273.1	12861.4	6712.12	15103	12943.3	14213.2	8291.25	9819.68	7407.9	7805.72	15746.6	15003.8
Q12907	LMAN2	Vesicular integral-membrane protein VIP36	42458.2	56923.3	24754.5	32714.8	31947.4	31717.3	29323	38731.9	57910.8	31341.6	36080.9	49906.1	36320.2	49792.3	20735.9	44791.7
Q9H0V9;Q9H0V9-2;Q9H0V9-3	LMAN2L	VIP36-like protein;Isoform of Q9H0V9, Isoform 2 of VIP36-like protein;Isoform of Q9H0V9, Isoform 3 of VIP36-like protein	6425	6149.02	14970.2	9119.8	NaN	6684.16	NaN	NaN	7053.98	NaN	NaN	8194.21	6314.84	7984.14	11580.1	8160.11
Q9NZU5	LMCD1	LIM and cysteine-rich domains protein 1	416397	1.02372e+06	992782	989269	753509	998911	960906	884793	503981	866888	705669	728358	621577	451953	737839	675950
P02545	LMNA	Prelamin-A/C	820380	742133	996249	820966	1111427	737995	763998	657841	664961	821778	781867	789398	901514	848741	954419	805814
P02545-2	LMNA	Isoform of P02545, Isoform C of Prelamin-A/C	15979.9	8484.36	25485.9	23348.1	23451.6	16194.4	17287.6	11553.2	15139.8	26511.4	14509	19118.7	10467.1	17466.7	NaN	4319.08
P20700	LMNB1	Lamin-B1	39053	17808	17202.1	23474.1	47892	10574.6	27227.3	29586.9	14509.3	17794.7	26745.8	13469.6	39164.1	36873.7	33581.6	15429.7
Q03252	LMNB2	Lamin-B2	119794	112503	146189	113330	156671	108965	91202.1	97249.1	92245	114019	109642	117844	128924	85428.6	120496	104187
A0A0A0MTE2;E9PMT2;F8WD26;J3KP06	LMO7	Isoform of Q8WWI1, LIM domain only protein 7;Isoform of Q8WWI1, LIM domain only protein 7;Isoform of Q8WWI1, LIM domain only protein 7;Isoform of Q8WWI1, LIM domain only protein 7	15861.6	14750.2	18459.6	17920.2	16241.6	6713.2	15210	17948.4	11668	12830.7	12180.8	14704.8	14127	14792.7	21502.2	16991.1
E9PMS6	LMO7	Isoform of Q8WWI1, LIM domain only protein 7	NaN	NaN	NaN	9408.54	NaN	NaN	5533.73	NaN	NaN	8989.62	NaN	14321.6	8615.71	NaN	NaN	15933.3
P29536;P29536-2;Q9BV00	LMOD1	Leiomodin-1;Isoform of P29536, Isoform 2 of Leiomodin-1;Isoform of P29536, LMOD1 protein	NaN	NaN	3600.13	2260.75	6352.12	64411.6	5018.79	NaN	NaN	3291.95	NaN	3967.78	4590.29	53081.2	4985.05	NaN
Q6P5Q4	LMOD2	Leiomodin-2	14267.5	41455.2	16052.3	5161.79	18301.3	27547.1	19553.7	17336.3	18865.6	17959.5	18827.3	16177.8	12151.4	40300.8	47119.5	17898.5
Q0VAK6	LMOD3	Leiomodin-3	32232.6	37439.2	36250.7	21070.7	31549.9	34836.7	33443.2	37411.6	30482.7	35536.5	34123	22970.8	32076.9	33084.2	38362.5	29081.9
Q9UIQ6;Q9UIQ6-2;Q9UIQ6-3	LNPEP	Leucyl-cystinyl aminopeptidase;Isoform of Q9UIQ6, Isoform 2 of Leucyl-cystinyl aminopeptidase;Isoform of Q9UIQ6, Isoform 3 of Leucyl-cystinyl aminopeptidase	8389.28	5399.83	9187.39	NaN	NaN	6132.57	4120.64	5416.32	10108.6	7347.38	6653.28	21368.5	4820.29	9009.87	7915.95	6209.88
Q9C0E8;Q9C0E8-2;Q9C0E8-4	LNPK	Endoplasmic reticulum junction formation protein lunapark;Isoform of Q9C0E8, Isoform 2 of Endoplasmic reticulum junction formation protein lunapark;Isoform of Q9C0E8, Isoform 4 of Endoplasmic reticulum junction formation protein lunapark	31968.3	16675.5	32870.6	28279.8	40835.6	32195.1	27748.4	29380.3	32177.1	29697.2	26281.5	22013.4	27639.9	25300	26404.2	30601
A0A1B0GUP9;A0A1B0GVR7;A0A1B0GVY8	LOC285095	Isoform of A0A1B0GVY8, Uncharacterized protein;Isoform of A0A1B0GVY8, Uncharacterized protein;Uncharacterized protein (Fragment)	NaN	440.443	NaN	NaN	NaN	NaN	1837.36	NaN	NaN	NaN	NaN	NaN	NaN	NaN	NaN	2675.27
D6RIA3	LOC285556	Uncharacterized protein	8778.81	6312.77	9360.56	16389.3	10387.5	33407.7	9034.19	6612.51	7742.81	15060.3	8390.19	4786.68	9802.76	7220.52	9314.7	7097.73
A4D104;C9J7I0	LOC401307;UMAD1	Isoform of C9J7I0, HCG19535;UBAP1-MVB12-associated (UMA)-domain containing protein 1	8924.05	NaN	13913.7	9798.89	17355.7	11086.3	12706.9	7597.79	9878.52	7851.83	3318.4	10903.8	10523.2	17650.5	8708.72	NaN
K7EJE8;K7EKE6;P36776;P36776-2	LONP1	Isoform of P36776, Lon protease homolog, mitochondrial;Isoform of P36776, Lon protease homolog, mitochondrial;Lon protease homolog, mitochondrial;Isoform of P36776, Isoform 2 of Lon protease homolog, mitochondrial	15460.4	12505.3	18885.8	7892.98	10169.5	11494.4	10219.3	17048.5	16979.2	17646.1	13554.2	23560.6	15152.4	12174.2	18881.7	17564.5
F5H0M4;Q6P1A2;Q6P1A2-2	LPCAT3	Isoform of Q6P1A2, Lysophospholipid acyltransferase 5;Lysophospholipid acyltransferase 5;Isoform of Q6P1A2, Isoform 2 of Lysophospholipid acyltransferase 5	NaN	NaN	NaN	NaN	NaN	NaN	NaN	NaN	1005.81	NaN	1212.54	NaN	NaN	NaN	12178.1	NaN
A0A0A0MS66;H7C3T1;Q14693;Q14693-2;Q14693-3;Q14693-4;Q14693-5;Q14693-7	LPIN1	Isoform of Q14693, Phosphatidate phosphatase LPIN1;Isoform of Q14693, Phosphatidate phosphatase LPIN1 (Fragment);Phosphatidate phosphatase LPIN1;Isoform of Q14693, Isoform 2 of Phosphatidate phosphatase LPIN1;Isoform of Q14693, Isoform 3 of Phosphatidate phosphatase LPIN1;Isoform of Q14693, Isoform 4 of Phosphatidate phosphatase LPIN1;Isoform of Q14693, Isoform 5 of Phosphatidate phosphatase LPIN…	NaN	NaN	NaN	NaN	NaN	NaN	NaN	5185.78	6937.52	6300.92	NaN	NaN	8265.65	5173.34	8113.66	NaN
Q93052	LPP	Lipoma-preferred partner	35370.2	22006.5	42211.5	24567.6	35209.5	24932.8	24786.1	20911.2	20918.2	20186	19275.2	28263.8	22660.5	14274.9	17205.9	13508.9
E9PEM5;H0YAC6;P50851;P50851-2	LRBA	Isoform of P50851, Lipopolysaccharide-responsive and beige-like anchor protein;Isoform of P50851, Lipopolysaccharide-responsive and beige-like anchor protein (Fragment);Lipopolysaccharide-responsive and beige-like anchor protein;Isoform of P50851, Isoform 2 of Lipopolysaccharide-responsive and beige-like anchor protein	NaN	NaN	NaN	NaN	NaN	NaN	NaN	3143.95	NaN	NaN	3076.15	2776.81	NaN	4337.01	4616.34	NaN
P02750	LRG1	Leucine-rich alpha-2-glycoprotein	15461.9	NaN	34314.5	30430.8	13124.3	16304.4	7402.68	17021.3	17379.2	10113.5	14140	30581.5	11684.2	35592	24865.6	18096
P30533	LRPAP1	Alpha-2-macroglobulin receptor-associated protein	13735.6	13720.3	21792.7	26641.9	18631.9	22834.9	14500.3	15320.4	9452.32	17746.1	12019.3	20483.8	15752.5	18136.6	13315.1	15933.2
P42704	LRPPRC	Leucine-rich PPR motif-containing protein, mitochondrial	129556	103183	113949	79206.2	69273.4	109599	77662.1	134619	158800	134750	150633	132236	114389	116366	129736	146699
Q8TCA0	LRRC20	Leucine-rich repeat-containing protein 20	131953	134654	160106	158717	227858	227860	142773	147333	112099	158107	111443	178310	186590	153106	137318	147678
Q96DD0;Q96DD0-2	LRRC39	Leucine-rich repeat-containing protein 39;Isoform of Q96DD0, Isoform 2 of Leucine-rich repeat-containing protein 39	14140.6	12188.8	13492.5	10944.1	14925.3	12597.1	16070.5	16370.2	16089.5	14801.8	32507.6	21152.1	12529.9	23091.3	21325.1	14135.6
Q8N1G4	LRRC47	Leucine-rich repeat-containing protein 47	71604.4	60553	67914.3	57747.8	69159	69880.3	54059	71435.7	64333.8	59894.9	44456.8	63217.8	58544.7	70736	82691.3	71744.1
Q96AG4	LRRC59	Leucine-rich repeat-containing protein 59	20884.3	20522.5	17306.3	37143.7	61604.7	23215.8	22750.6	22539.1	33857.8	39222.6	41713.1	25430.6	69975.7	65448.6	33773.5	37038.7
Q32MZ4-4	LRRFIP1	Isoform of Q32MZ4, Isoform 4 of Leucine-rich repeat flightless-interacting protein 1	13158.7	NaN	8281.41	11738.3	10566.7	10032.2	10926.7	8256.75	7717.47	4643.89	8882.85	7533.37	9586.22	12036.4	9414.49	11047.1
Q32MZ4;Q32MZ4-2;Q32MZ4-3	LRRFIP1	Leucine-rich repeat flightless-interacting protein 1;Isoform of Q32MZ4, Isoform 2 of Leucine-rich repeat flightless-interacting protein 1;Isoform of Q32MZ4, Isoform 3 of Leucine-rich repeat flightless-interacting protein 1	30862.7	74049.8	10534.4	37552.1	29607.9	24136.8	19107.7	1653.81	23041.3	9552.13	13679.6	15528.9	20589.5	5623.85	19867.6	12617.4
Q9Y608	LRRFIP2	Leucine-rich repeat flightless-interacting protein 2	18564.3	19264.4	11379.7	14241.5	15942.7	27263.5	23681.5	27462.1	19873.4	13886.7	10815.3	7670.6	22414.5	19184.5	23243.7	17044.1
P62310	LSM3	U6 snRNA-associated Sm-like protein LSm3	54867.8	54451.6	46194.4	44305.3	43227	42077.6	36843.3	38635.1	48717	47294.3	36805.3	45352.5	38044.3	80738.5	61417.7	47541.1
Q9Y4Z0;U3KQK1;U3KQS7;V9GZ56	LSM4	U6 snRNA-associated Sm-like protein LSm4;Isoform of Q9Y4Z0, U6 snRNA-associated Sm-like protein LSm4;Isoform of Q9Y4Z0, U6 snRNA-associated Sm-like protein LSm4 (Fragment);Isoform of Q9Y4Z0, U6 snRNA-associated Sm-like protein LSm4 (Fragment)	20791.4	19277	NaN	11794.5	19263.8	22452.5	14073.9	16177.1	26773	22625.3	22982.6	26616.6	23816.7	34165.2	28174	18009.4
Q9Y4Y9	LSM5	U6 snRNA-associated Sm-like protein LSm5	94458.6	88455.7	67039.5	94592.4	38013.7	53741.7	31392.1	44933.9	47177.4	43693.8	35087.8	32467.9	49570.6	67191.3	43156	41760.7
O95777	LSM8	U6 snRNA-associated Sm-like protein LSm8	NaN	NaN	13824.5	11092.3	NaN	3968.54	6149.13	14933	NaN	6648.9	12835.2	12221.6	13150.7	14720.5	9619.41	9322.76
Q8N8F7	LSMEM1	Leucine-rich single-pass membrane protein 1	15113.9	11110.4	31528.5	31244.9	35324.4	44600.4	22476	23448	21779.6	18533.7	8751.13	28965.1	29562.1	35463.6	11265.8	22424
Q8N112	LSMEM2	Leucine-rich single-pass membrane protein 2	17133.1	NaN	34539.7	15236.2	19453.5	17998.5	9959.61	11631.5	21646	NaN	NaN	25762.4	17314.4	27706.1	42286.7	NaN
P33241	LSP1	Lymphocyte-specific protein 1	NaN	NaN	NaN	NaN	NaN	NaN	NaN	NaN	NaN	NaN	NaN	NaN	9190.11	6417.27	4625.68	NaN
P48449;P48449-3	LSS	Lanosterol synthase;Isoform of P48449, Isoform 3 of Lanosterol synthase	34319.2	42673.4	47125.5	39214.9	33419.9	55112	31771.5	30315.4	33919.6	39271.6	32731.9	41902.7	29620.5	41901.1	33209.4	21097.1
P09960	LTA4H	Leukotriene A-4 hydrolase	195549	206051	199800	182896	192250	176191	195101	179950	176314	184354	138409	210511	184885	118029	148729	130037
G3V3X5;G3V511;Q14767	LTBP2	Isoform of Q14767, Latent-transforming growth factor beta-binding protein 2;Isoform of Q14767, Latent-transforming growth factor beta-binding protein 2;Latent-transforming growth factor beta-binding protein 2	NaN	NaN	NaN	NaN	NaN	NaN	6548.8	NaN	8118.56	NaN	NaN	NaN	NaN	27460.9	NaN	NaN
A0A0A6YYJ8;Q96HJ9-2	LUC7L2;FMC1	Isoform of Q9Y383, Putative RNA-binding protein Luc7-like 2;Isoform of Q96HJ9, Isoform 2 of Protein FMC1 homolog	42530.6	42167.8	36309.6	36275.8	84172.5	44834.9	25905.8	26528.6	62711.4	45228.1	28267.7	22906.8	15241.5	44463.9	36559.3	42768.8
J3KPP4;O95232	LUC7L3	Isoform of O95232, Cisplatin resistance-associated overexpressed protein, isoform CRA_b;Luc7-like protein 3	13265.9	10888.5	21041.4	11295.4	25477	15176.8	8283.86	9174.55	12091.3	10635	8041.73	12889	11316	14664.6	10529.6	9680.75
P51884	LUM	Lumican	471239	381519	370377	304557	419771	482430	300944	375212	563462	284313	356480	360111	398562	1.03242e+06	590274	386653
Q9BS40	LXN	Latexin	13859.6	16195	19454.6	20282.8	18530.1	10904.9	10221	6688.13	10760.4	NaN	10526.7	15154.7	8821.54	10323.6	7159.89	11941
A0A087X1K9;O75608;O75608-2	LYPLA1	Isoform of O75608, Acyl-protein thioesterase 1;Acyl-protein thioesterase 1;Isoform of O75608, Isoform 2 of Acyl-protein thioesterase 1	376770	440371	410368	340996	320111	363472	330881	337523	455956	373206	292686	456227	306523	291590	367968	339814
O95372	LYPLA2	Acyl-protein thioesterase 2	15412	18957.6	17986.8	14715.7	17032.1	20332.5	17124.3	14269.2	16283.1	17562	19445.4	19818.8	19512.3	16157.5	19050.6	19807.4
Q5VWZ2;Q5VWZ2-2	LYPLAL1	Lysophospholipase-like protein 1;Isoform of Q5VWZ2, Isoform 2 of Lysophospholipase-like protein 1	11132.4	11599.7	10716.7	9844.76	6649.61	11969	10348.3	14497.7	17811	NaN	13394.7	8380.99	15398.1	13766.1	9834.42	12791.9
Q5U5X0	LYRM7	Complex III assembly factor LYRM7	89590.7	65823.9	44234.9	35017.1	29338.9	59130.6	38845.2	59594.7	80823.4	66496.1	59369.8	61815.6	40285.3	70570.5	40253.4	77672.8
A0A0B4J259;F8VV32;P61626	LYZ	Isoform of P61626, Lysozyme;Isoform of P61626, Lysozyme;Lysozyme C	NaN	11034.5	NaN	5156.42	NaN	7933.52	5635.25	NaN	7043.8	NaN	9166.77	NaN	NaN	NaN	32741.7	NaN
Q8WZA0;Q8WZA0-2	LZIC	Protein LZIC;Isoform of Q8WZA0, Isoform 2 of Protein LZIC	13315.2	14016.8	14569.9	26290.7	14208	17765.4	24800.4	14287.7	19598.8	13206.8	35947.8	18205.6	33823.6	36876.7	17720.5	17267.3
H0Y390;H3BPE1;H3BQK9;Q9UPN3;Q9UPN3-2;Q9UPN3-3;Q9UPN3-4;Q9UPN3-5	MACF1	Isoform of Q9UPN3, Microtubule-actin cross-linking factor 1, isoforms 1/2/3/5 (Fragment);Isoform of Q9UPN3, Microtubule-actin cross-linking factor 1, isoforms 1/2/3/5;Isoform of Q9UPN3, Microtubule-actin cross-linking factor 1, isoforms 1/2/3/5;Microtubule-actin cross-linking factor 1, isoforms 1/2/3/5;Isoform of Q9UPN3, Isoform 2 of Microtubule-actin cross-linking factor 1, isoforms 1/2/3/5;Isof…	243607	186383	40200.4	85698.7	223544	119553	NaN	NaN	215892	144504	37478	59989.4	126952	176450	185037	NaN
Q9BQ69	MACROD1	O-acetyl-ADP-ribose deacetylase MACROD1	197032	206480	276515	258115	248564	257844	242338	273621	206937	267112	279312	207460	218002	167402	175214	255809
Q8WWC4	MAIP1	m-AAA protease-interacting protein 1, mitochondrial	120608	4015.27	5015.37	4096.93	28861.1	5030.25	46971.1	5906.29	7292.22	8757.65	5779.46	6891.28	6248.44	4365.77	6407.31	8914.55
Q9NTJ4;Q9NTJ4-2;Q9NTJ4-3;Q9NTJ4-4	MAN2C1	Alpha-mannosidase 2C1;Isoform of Q9NTJ4, Isoform 2 of Alpha-mannosidase 2C1;Isoform of Q9NTJ4, Isoform 3 of Alpha-mannosidase 2C1;Isoform of Q9NTJ4, Isoform 4 of Alpha-mannosidase 2C1	NaN	7564.73	1877.05	25506.4	1708.12	5807.95	17050.1	12168.9	23100.9	2489.23	14251.4	24106.8	24287.3	4093.95	20950.6	22676.2
A8K878;P55145	MANF	Isoform of P55145, Mesencephalic astrocyte-derived neurotrophic factor;Mesencephalic astrocyte-derived neurotrophic factor	NaN	NaN	7869.86	5415.28	8722.59	6398.72	6098.07	5923.21	8996.51	8207.51	6314.85	8688.84	11288.4	15540	9546.29	8930.37
P21397	MAOA	Amine oxidase [flavin-containing] A	28195.9	29743	NaN	21336.9	NaN	32342.3	7138.73	NaN	42034.4	36830.5	10148.8	25755.6	NaN	20059.4	6753.34	11693.5
P27338	MAOB	Amine oxidase [flavin-containing] B	90992.6	117478	125169	85939	87108.8	110119	96284.3	102706	125515	147714	153628	112235	108629	73015.2	100783	132041
P46821	MAP1B	Microtubule-associated protein 1B	7186.32	5232.03	11975.2	NaN	17150	NaN	2535.7	NaN	7710.79	13342	53935.9	8692.79	5667.56	28144	8571.77	5122.44
Q66K74;Q66K74-2	MAP1S	Microtubule-associated protein 1S;Isoform of Q66K74, Isoform 2 of Microtubule-associated protein 1S	NaN	NaN	NaN	6437.52	8254.2	5305.58	NaN	NaN	7029.83	7935.1	4647.39	8784.42	8025.01	8196.79	5358.62	2415.07
P11137;P11137-3	MAP2	Microtubule-associated protein 2;Isoform of P11137, Isoform 3 of Microtubule-associated protein 2	NaN	NaN	6533.44	8373.51	NaN	9674.47	NaN	17573.5	NaN	2583.58	NaN	5838.03	4316.35	17669.4	5335.54	NaN
Q02750	MAP2K1	Dual specificity mitogen-activated protein kinase kinase 1	48389.3	60587.2	72268.1	55362.8	71196.6	53544.5	46234.9	53546.6	42798.3	48800.5	39711	66568.1	38493.7	47797.1	60352.1	39627.9
P36507	MAP2K2	Dual specificity mitogen-activated protein kinase kinase 2	32031	37143.5	28821.2	35366.8	34305.9	43459.8	33987.2	37746.8	38264	33151	27966.1	33319.3	36917.9	35230.4	41946.7	33417.1
P46734	MAP2K3	Dual specificity mitogen-activated protein kinase kinase 3	49742.5	59599.2	52444.6	43554.4	50544	56877.1	55631.1	74426.2	67076.4	54910.8	52082.7	51294.1	59144.6	38431.9	63564.4	51857.2
P45985;P45985-2	MAP2K4	Dual specificity mitogen-activated protein kinase kinase 4;Isoform of P45985, Isoform 2 of Dual specificity mitogen-activated protein kinase kinase 4	55691.4	41669.1	10295	17037.5	NaN	31218.1	43348.8	40460.4	8915.76	30184.5	13220.1	11640	8630.18	31805.4	51291.9	31996.9
P52564	MAP2K6	Dual specificity mitogen-activated protein kinase kinase 6	77658.6	98074.4	105858	92433.4	89088	85357.5	82290.7	90863.1	87276.4	82111	73975.2	96136.5	86365.8	52644.8	83197.4	60121.8
E7EVA0	MAP4	Isoform of P27816, Microtubule-associated protein	520152	518364	649165	542137	704510	701491	391085	371321	493203	510886	364439	530079	630886	1.1439e+06	490635	492100
P27816-5	MAP4	Isoform of P27816, Isoform 5 of Microtubule-associated protein 4	31209.2	NaN	32013	3156.85	22337.9	NaN	NaN	22224.6	NaN	28272.6	NaN	12993.6	19052.9	36395.4	NaN	14119.6
Q3KQU3;Q3KQU3-2;Q3KQU3-4	MAP7D1	MAP7 domain-containing protein 1;Isoform of Q3KQU3, Isoform 2 of MAP7 domain-containing protein 1;Isoform of Q3KQU3, Isoform 4 of MAP7 domain-containing protein 1	11926.1	8534.84	7343.87	2564.99	13771.3	13543.5	10739.8	9155.42	15102.1	8581.06	11404.4	4431.24	16608.9	29629.9	17407	15390
P28482	MAPK1	Mitogen-activated protein kinase 1	37351.6	41727.2	60986.7	83952.5	91723.2	34910.7	66724.1	31919.8	37918.9	66696.3	30537	58787.5	32697.8	38330.3	103605	41061.6
P53778;P53778-2	MAPK12	Mitogen-activated protein kinase 12;Isoform of P53778, Isoform 2 of Mitogen-activated protein kinase 12	66497.1	150331	10764.9	20770.4	10485.5	26707	17124.5	8987.78	98441.1	12232.7	10376.2	8719.75	10765	24361.3	18798.8	11464.8
B4E0K5;Q16539	MAPK14	Isoform of Q16539, Mitogen-activated protein kinase;Mitogen-activated protein kinase 14	7646.94	7346.23	4686.23	3701.13	3654.14	8363.73	5732.17	8326.77	6811.58	8627.91	5189.95	3897.28	22717.9	4511.37	8019.49	7106.16
A0A1C7CYZ1;Q8TD08;Q8TD08-2;Q8TD08-3	MAPK15	Isoform of Q8TD08, Mitogen-activated protein kinase 15 (Fragment);Mitogen-activated protein kinase 15;Isoform of Q8TD08, Isoform 2 of Mitogen-activated protein kinase 15;Isoform of Q8TD08, Isoform 3 of Mitogen-activated protein kinase 15	35624.1	47765.8	53055.6	NaN	34558.4	NaN	NaN	67369	NaN	17440.1	47937	55765	NaN	53463	70474.3	NaN
Q8NDC0	MAPK1IP1L	MAPK-interacting and spindle-stabilizing protein-like	289554	316347	277554	222129	286416	279244	172267	226396	262922	191388	181171	165173	193889	368037	206339	172835
P27361	MAPK3	Mitogen-activated protein kinase 3	27821.3	54460.3	49589.3	83339.6	36534.9	63800.3	52269.1	41904.7	67765.6	55878.3	47101.2	30182.4	35906.6	22132.8	42272.8	42130.9
J3KNK1;P45984;P45984-2;P45984-3;P45984-4	MAPK9	Isoform of P45984, Mitogen-activated protein kinase;Mitogen-activated protein kinase 9;Isoform of P45984, Isoform Alpha-1 of Mitogen-activated protein kinase 9;Isoform of P45984, Isoform Beta-1 of Mitogen-activated protein kinase 9;Isoform of P45984, Isoform Beta-2 of Mitogen-activated protein kinase 9	1.52877e+06	2.08385e+06	1.41554e+06	1.65616e+06	1.42485e+06	1.51464e+06	499564	405172	780037	484193	1.17688e+06	771204	1.73281e+06	NaN	2.65521e+06	752734
P49137	MAPKAPK2	MAP kinase-activated protein kinase 2	NaN	NaN	NaN	2759.96	3738.75	NaN	NaN	NaN	NaN	2520.15	NaN	NaN	3261.57	NaN	NaN	NaN
Q16644	MAPKAPK3	MAP kinase-activated protein kinase 3	3825.04	13057.3	9338.88	8485.94	10233.2	10762.4	7841.08	7116.65	12157.6	10882.1	6931.74	8429.63	11112	2009.21	9473.27	11673.9
Q15691	MAPRE1	Microtubule-associated protein RP/EB family member 1	61866.6	49790	54203.6	116874	49606.1	21217.6	32316	56995.6	63503.7	13874.8	35473.1	62969.7	55778.2	57018.9	48037.5	16776.5
Q15555;Q15555-3;Q15555-4;Q15555-5	MAPRE2	Microtubule-associated protein RP/EB family member 2;Isoform of Q15555, Isoform 3 of Microtubule-associated protein RP/EB family member 2;Isoform of Q15555, Isoform 4 of Microtubule-associated protein RP/EB family member 2;Isoform of Q15555, Isoform 5 of Microtubule-associated protein RP/EB family member 2	24098.1	30284.5	20370.1	23989.8	24711.2	26682.4	25756.5	19397.6	24754.4	21496.6	14657.7	20893.5	21904	20819.7	17884.6	23363
Q9UPY8	MAPRE3	Microtubule-associated protein RP/EB family member 3	34780.2	31690	41295.5	54285.9	36499.1	52332.2	42251	41173.3	45779.4	39407.8	20187.7	40342.8	50383.1	53311.7	38433.7	42979.8
A0A0G2JPD5;P10636	MAPT	Isoform of P10636, Microtubule-associated protein;Microtubule-associated protein tau	208708	288487	366252	268888	369803	307965	244522	186392	237830	286093	237812	339872	448464	560438	272061	269604
A0A0G2JQJ7	MAPT	Isoform of P10636, Microtubule-associated protein	NaN	NaN	NaN	NaN	NaN	NaN	NaN	NaN	13692.8	NaN	NaN	NaN	NaN	NaN	NaN	NaN
P29966	MARCKS	Myristoylated alanine-rich C-kinase substrate	61074.2	58735.5	39381.1	48251.3	65028.1	57031	39876.2	39982.6	96688.4	55032.5	40582.3	54529.8	79893.1	186023	69198	75721.3
P49006	MARCKSL1	MARCKS-related protein	29238	12245.4	13357.1	10743.6	11601.6	14873.9	13688.3	10040.1	26654.1	21183.9	11616.4	18982.6	24822.5	44161.1	21583.1	20946.6
P56192	MARS	Methionine--tRNA ligase, cytoplasmic	NaN	NaN	10250.2	NaN	NaN	5129.15	6447.19	4732.88	7986.08	6961.35	4126.07	NaN	NaN	3847.78	6194.28	6491.89
P31153	MAT2A	S-adenosylmethionine synthase isoform type-2	44520	48987.4	50432.3	30195.6	42326.4	47736.1	28506	30438.1	41698.3	37692.2	26585.6	29001.1	40692.4	35982.8	37996	33064.5
Q9NZL9	MAT2B	Methionine adenosyltransferase 2 subunit beta	21009.3	17396.4	22043.9	14973.7	23094.4	22512.3	16354.5	17840.3	23237.1	22085.1	17033.5	20172.3	22865.5	17447.9	19543.9	18205.1
A0A0R4J2E8;A8MXP9;P43243	MATR3	Isoform of P43243, Matrin-3;Isoform of P43243, Matrin-3;Matrin-3	44649.2	30636.3	40701.4	35295.6	49930.6	30861.3	29974.8	30921.7	35534.7	35699.4	33594.6	34656.3	37814	39673.2	32485.6	37990.8
Q7Z434	MAVS	Mitochondrial antiviral-signaling protein	147824	141969	114800	113140	160245	191620	120818	123769	173505	160474	106356	152594	169792	195841	128658	130742
P02144	MB	Myoglobin	41495672	44357336	88404016	69079488	69774288	114623712	94727664	50937796	52956256	98816864	41914836	105597384	123091880	114200208	76878872	86663216
A0A0A0MQX8;C9JP00;Q9NR56;Q9NR56-2;Q9NR56-3;Q9NR56-4;Q9NR56-5;Q9NR56-6;Q9NR56-7	MBNL1	Isoform of Q9NR56, Muscleblind-like protein 1;Isoform of Q9NR56, Muscleblind-like protein 1;Muscleblind-like protein 1;Isoform of Q9NR56, Isoform 2 of Muscleblind-like protein 1;Isoform of Q9NR56, Isoform 3 of Muscleblind-like protein 1;Isoform of Q9NR56, Isoform 4 of Muscleblind-like protein 1;Isoform of Q9NR56, Isoform 5 of Muscleblind-like protein 1;Isoform of Q9NR56, Isoform 6 of Muscleblind-…	14194.8	NaN	11893.5	11892.9	14020.8	24871.5	16452.9	8925.47	20099.1	7298.68	17687.8	9326.85	12685.7	22721.6	17577	22459.7
A8MZH3;E9PKX9;E9PLQ9;E9PLU9;E9PMR5;E9PNZ1;E9PQE7;E9PSE2;F5H7N4;F8WEU6;H0YEA2;H0YF02;H7BYR8;J3KS94;J3KT34;J3QKL5;J3QL64;J3QQK6;P02686;P02686-2;P02686-3;P02686-4;P02686-5;P02686-6	MBP	Isoform of P02686, Myelin basic protein;Isoform of P02686, Myelin basic protein;Isoform of P02686, Myelin basic protein;Isoform of P02686, Myelin basic protein;Isoform of P02686, Myelin basic protein;Isoform of P02686, Myelin basic protein (Fragment);Isoform of P02686, Myelin basic protein;Isoform of P02686, Myelin basic protein;Isoform of P02686, Myelin basic protein;Isoform of P02686, Myelin ba…	NaN	NaN	NaN	NaN	NaN	NaN	NaN	NaN	NaN	5784.38	NaN	NaN	NaN	NaN	NaN	NaN
P43121	MCAM	Cell surface glycoprotein MUC18	45266.7	8746.08	41321.7	9270.84	NaN	33090.1	43888.3	9207.11	76704.2	26229.7	47632.1	111718	56025.8	73091.4	69764.9	61707.7
E9PG35;E9PHF7;F5GYT8;Q96RQ3	MCCC1	Isoform of Q96RQ3, Methylcrotonoyl-CoA carboxylase subunit alpha, mitochondrial (Fragment);Isoform of Q96RQ3, Methylcrotonoyl-CoA carboxylase subunit alpha, mitochondrial;Isoform of Q96RQ3, Methylcrotonoyl-CoA carboxylase subunit alpha, mitochondrial;Methylcrotonoyl-CoA carboxylase subunit alpha, mitochondrial	41883	NaN	55435.3	NaN	7583.88	14346.6	NaN	12439.6	9597.84	37515.1	25925.6	10554.7	11152.6	NaN	6604.19	26023.9
Q9HCC0	MCCC2	Methylcrotonoyl-CoA carboxylase beta chain, mitochondrial	6378.8	23251.7	37513.5	7738.5	8918.13	25011	17147.9	10864.7	20467.5	31912.9	29166.8	21051.4	21777.2	7719.01	12383.8	19747.1
Q96PE7	MCEE	Methylmalonyl-CoA epimerase, mitochondrial	42497.1	23855	27641.1	24299.3	9970.87	7740.75	20601.9	12965.2	33323.4	27521.2	39384.7	80368.2	9634.65	21133.3	45795.8	13740.3
Q8NI22	MCFD2	Multiple coagulation factor deficiency protein 2	NaN	NaN	43390.9	60579.7	25656.3	23924.1	19266.4	30160.4	17624	35640.8	9578.87	18726.1	3373.07	32586.6	2397.39	14829.5
H0Y8E6;P49736	MCM2	Isoform of P49736, DNA helicase (Fragment);DNA replication licensing factor MCM2	2.3407e+06	6899442	1.43303e+06	4511637	3530978	5.21113e+06	1.59566e+06	1.90881e+06	4.39333e+06	13751426	4662581	1.96016e+06	10077727	1.32697e+06	4.17947e+06	989852
I3L172;Q9BUT9;Q9BUT9-2	MCRIP2	Isoform of Q9BUT9, MAPK-regulated corepressor-interacting protein 2;MAPK regulated corepressor interacting protein 2;Isoform of Q9BUT9, Isoform 2 of MAPK regulated corepressor interacting protein 2	4481.33	5326.23	NaN	NaN	NaN	7794.26	4257.08	5623.1	NaN	NaN	NaN	9301.92	6658.7	11650.9	6371.98	5794.35
Q9ULC4;Q9ULC4-3	MCTS1	Malignant T-cell-amplified sequence 1;Isoform of Q9ULC4, Isoform 3 of Malignant T-cell-amplified sequence 1	69630.5	22734.7	51560	54376.5	32373.4	66553.7	17407.2	19060.4	61828.8	66070.4	13629.3	21701	24287.1	16295.3	49336.9	46458.2
Q8NE86;Q8NE86-2;Q8NE86-3	MCU	Calcium uniporter protein, mitochondrial;Isoform of Q8NE86, Isoform 2 of Calcium uniporter protein, mitochondrial;Isoform of Q8NE86, Isoform 3 of Calcium uniporter protein, mitochondrial	5846.24	5569.77	5767.09	3693.07	9430.47	15505.7	8979.83	11668.1	13865.7	15022.7	18077.9	11664.3	5949.81	7321.6	15722.3	17248.1
P40925;P40925-3	MDH1	Malate dehydrogenase, cytoplasmic;Isoform of P40925, Isoform 3 of Malate dehydrogenase, cytoplasmic	5.81585e+06	6.56778e+06	9466546	5.99742e+06	7.63656e+06	9831339	5.07683e+06	5.10093e+06	7826723	7253670	5241217	8.25953e+06	6815378	4331923	3990892	5880657
P40926	MDH2	Malate dehydrogenase, mitochondrial	4.69611e+06	7.75479e+06	9391966	6.83998e+06	6694773	9392308	6069943	8776764	5522726	9938436	8.27087e+06	11645086	9187722	6.2013e+06	8317918	9889237
P48163	ME1	NADP-dependent malic enzyme	131924	77530.7	186189	200583	181311	134468	124000	103321	172251	75057.2	101609	184695	189358	181122	154371	159896
A0A1W2PPH1;P23368	ME2	Isoform of P23368, Malic enzyme;NAD-dependent malic enzyme, mitochondrial	32006	38371.9	44256.5	59532.2	30606.1	30167.8	19433.5	24463.1	37750.9	31624.4	29464.9	67493.5	52222.1	32141.1	35373.9	36707.1
E9PMB9;Q16798	ME3	Isoform of Q16798, Malic enzyme (Fragment);NADP-dependent malic enzyme, mitochondrial	NaN	6274.55	NaN	5101.08	NaN	3673.51	NaN	4425.45	10465.5	8867.59	4132.53	6945.43	7313.29	15135.9	NaN	8434.99
P51608-2	MECP2	Isoform of P51608, Isoform B of Methyl-CpG-binding protein 2	64700.1	52388.3	95360.2	65285.3	92462.8	84875.7	61217.1	57904.5	70700.7	70035.5	47682.1	76831.8	74239.4	91500	66410.4	47418.4
Q9BV79	MECR	Enoyl-[acyl-carrier-protein] reductase, mitochondrial	35956	21996.9	28805.4	17853.4	18627.5	29548.1	19426.4	30620	32000	19810.3	22832.8	27525.7	23485.7	19700.6	30977.7	33741.6
Q14814;Q14814-2;Q14814-3;Q14814-4;Q14814-5;Q14814-6	MEF2D	Myocyte-specific enhancer factor 2D;Isoform of Q14814, Isoform MEF2DA'B of Myocyte-specific enhancer factor 2D;Isoform of Q14814, Isoform MEF2D0B of Myocyte-specific enhancer factor 2D;Isoform of Q14814, Isoform MEF2DA0 of Myocyte-specific enhancer factor 2D;Isoform of Q14814, Isoform MEF2DA'0 of Myocyte-specific enhancer factor 2D;Isoform of Q14814, Isoform MEF2D00 of Myocyte-specific enhancer f…	4870.25	15183.6	8989.09	5284.91	10930.6	10560.4	6032.24	6985.77	NaN	6477.79	4255.48	6288.75	11720.7	9140.12	4319.64	5810.88
Q9Y316;Q9Y316-3	MEMO1	Protein MEMO1;Isoform of Q9Y316, Isoform 3 of Protein MEMO1	6890.51	10119.5	11910.3	20208.3	23461.8	8007.73	12843.7	19155.3	6310.03	8119.06	13738	12211.4	6600.25	9191.44	7947.77	9852.28
Q14696	MESD	LRP chaperone MESD	41599.5	15835.3	32402	12923.8	29247.6	NaN	NaN	33775.1	43486.3	9634.16	15889	31009.9	12579.7	37502	25180.6	5175.3
P53582	METAP1	Methionine aminopeptidase 1	7694.15	2624.93	4917.28	7234.38	3025.56	NaN	5590.09	5597.45	8008.32	7772.26	6016.53	3529.33	7562.06	6021.76	5948.24	11339.6
F8VQZ7	METAP2	Isoform of P50579, Methionine aminopeptidase 2	10441.6	6010.13	NaN	5427.56	6218.72	6202.39	5662.69	8319.32	6837.6	7066.78	5441.14	7313	7558.27	16292.4	10886.6	10251
P50579	METAP2	Methionine aminopeptidase 2	68184.8	78755.4	73784.2	63936.1	74796.3	70168.4	79541.5	58471.3	65139.8	71600.6	135540	64270.5	56689.6	82730.5	170322	55749.9
Q96S19	METTL26	Methyltransferase-like 26	13954.2	12264.7	18433.4	9258.55	7793.22	11970.4	15382.6	20611.9	11847.6	10432.4	11563.2	8789.11	17615.1	30879.4	20708.6	12483.5
F8VQX6;H0YI09;Q9H8H3	METTL7A	Isoform of Q9H8H3, Methyltransferase-like protein 7A (Fragment);Isoform of Q9H8H3, Methyltransferase-like protein 7A (Fragment);Methyltransferase-like protein 7A	44433.1	61620.4	30419.3	49645.1	40093.8	53993.5	38192.3	73196.1	47835.6	53962.4	35914.3	33231.7	29277.5	26656.2	61016.4	69820.2
K7ES70;P55083;P55083-2	MFAP4	Isoform of P55083, Microfibril-associated glycoprotein 4;Microfibril-associated glycoprotein 4;Isoform of P55083, Isoform 2 of Microfibril-associated glycoprotein 4	6451.57	8344.83	16579	8527.96	19797.3	10104.3	10194	8054.38	9128.44	11504.2	10847.4	9839.77	11455.8	4969	7144.23	7451.41
B3KW70;F5GYX4;H0YG03;Q13361;Q13361-2	MFAP5	Isoform of Q13361, Microfibrillar-associated protein 5;Isoform of Q13361, Microfibrillar-associated protein 5;Isoform of Q13361, Microfibrillar-associated protein 5 (Fragment);Microfibrillar-associated protein 5;Isoform of Q13361, Isoform 2 of Microfibrillar-associated protein 5	42243.1	2731.47	11901	39595.7	22149.2	38215.1	7868.8	8307.54	32876.4	15271.2	57723.1	17987	37404.9	34742.9	8868.85	37202
Q9GZY8;Q9GZY8-2;Q9GZY8-5	MFF	Mitochondrial fission factor;Isoform of Q9GZY8, Isoform 2 of Mitochondrial fission factor;Isoform of Q9GZY8, Isoform 5 of Mitochondrial fission factor	6040.03	NaN	4857.78	NaN	4982.37	2479.57	4133.64	3238.58	6627.47	4885.36	5568.79	6032.64	6478.56	5564.46	4929.91	4804.5
O95140;O95140-2	MFN2	Mitofusin-2;Isoform of O95140, Isoform 2 of Mitofusin-2	4838.86	NaN	2655.6	3965.36	3738.56	5114.48	5164.03	4224.69	6517.49	5931.75	7650.95	5717.4	8659.51	7044.39	7106.4	9901.93
D6RA47;D6RE79;D6RIZ4;Q14728	MFSD10	Isoform of Q14728, Major facilitator superfamily domain-containing protein 10;Isoform of Q14728, Major facilitator superfamily domain-containing protein 10;Isoform of Q14728, Major facilitator superfamily domain-containing protein 10;Major facilitator superfamily domain-containing protein 10	2168.96	NaN	1884.27	1568.63	1994.48	1202.45	2251.9	1161.15	1686.25	4221.31	1525.11	2815.63	2680.28	NaN	1507.67	1879.46
A0A0C4DFN3;Q99685	MGLL	Isoform of Q99685, Monoglyceride lipase;Monoglyceride lipase	21571.2	24158.7	26022.2	13857	21911.3	18351.7	18104.3	35180.5	21571.5	19077.4	18882.2	9264.04	11527.7	18123.2	11933.2	17430.1
Q99735;Q99735-2	MGST2	Microsomal glutathione S-transferase 2;Isoform of Q99735, Isoform 2 of Microsomal glutathione S-transferase 2	184681	157961	235610	178138	217183	164125	189754	183467	200950	210861	178781	147313	206480	94206.8	159253	205230
O14880;Q5VV89	MGST3	Microsomal glutathione S-transferase 3;Isoform of O14880, Microsomal glutathione S-transferase 3	260891	172825	128506	137566	165227	225706	246461	279590	384325	340624	371073	282013	250815	148960	244405	335132
J3KTI2;Q9BRT3	MIEN1	Isoform of Q9BRT3, Migration and invasion enhancer 1;Migration and invasion enhancer 1	NaN	53713.7	NaN	NaN	NaN	22730.9	15224.5	NaN	NaN	NaN	NaN	22541.1	66454.5	49419.5	NaN	67718.4
P14174	MIF	Macrophage migration inhibitory factor	742604	756508	473802	464582	495625	501358	442659	476236	669622	492679	665686	458944	533488	907821	643321	499740
Q8N5J2;Q8N5J2-3	MINDY1	Ubiquitin carboxyl-terminal hydrolase MINDY-1;Isoform of Q8N5J2, Isoform 3 of Ubiquitin carboxyl-terminal hydrolase MINDY-1	NaN	NaN	8834.56	4936.44	9398.99	9129.09	6195.28	5131.2	7848.03	6585.73	5481.28	8130.27	8080.4	8911.42	7267.65	6998.65
A0A087WU07;Q5TGZ0;Q5TGZ0-2	MINOS1	Isoform of Q5TGZ0, MICOS complex subunit MIC10;MICOS complex subunit MIC10;Isoform of Q5TGZ0, Isoform 2 of MICOS complex subunit MIC10	282621	233662	156823	529725	267288	566527	395130	523542	381027	326096	228977	155780	87797.3	127765	131388	329714
Q99797	MIPEP	Mitochondrial intermediate peptidase	10243.8	NaN	8717.8	NaN	4306.89	2626.09	NaN	NaN	8507.94	9838.25	3569.91	7623.36	8817.41	NaN	4861.63	5239.21
Q9HB66	MKKS	Isoform of Q9NPJ1, Alternative protein MKKS	169168	118375	133977	NaN	47127.7	123434	94919.6	110404	190224	NaN	95629.7	96599.4	94065.6	172581	110369	96561.5
Q14165	MLEC	Malectin	11871.3	29781.5	58895.1	33712.3	64237.9	11233.5	20123.9	10346.7	51918.4	46721.2	9832.04	6304.06	9820.98	6305.99	22454.9	22730.6
Q15773	MLF2	Myeloid leukemia factor 2	11126.5	7938.13	5957.24	5837.26	8749.97	6774.73	6600.77	4749.41	8315.94	11017.6	7606.84	7182.25	8777.06	39816.3	15937.1	7766.05
Q5VWP3	MLIP	Muscular LMNA-interacting protein	26114.5	30526.9	24162.1	NaN	NaN	34817.4	30580.2	NaN	37869.6	33214.6	28361.8	46376.5	50495	NaN	NaN	NaN
Q5VWP3-3	MLIP	Isoform of Q5VWP3, Isoform 3 of Muscular LMNA-interacting protein	128785	130482	131957	121484	162397	124115	131821	118524	119252	141968	107851	154062	138189	168324	148164	114934
A0A0A0MR05;H3BM50;H3BN58;H3BPT1;H3BPU5;H3BR25;H3BR38;H3BSZ4;Q9BVC4;Q9BVC4-4	MLST8	Isoform of Q9BVC4, Target of rapamycin complex subunit LST8;Isoform of Q9BVC4, Target of rapamycin complex subunit LST8;Isoform of Q9BVC4, Target of rapamycin complex subunit LST8 (Fragment);Isoform of Q9BVC4, Target of rapamycin complex subunit LST8;Isoform of Q9BVC4, Target of rapamycin complex subunit LST8;Isoform of Q9BVC4, Target of rapamycin complex subunit LST8 (Fragment);Isoform of Q9BVC4…	4478.4	NaN	NaN	NaN	NaN	NaN	NaN	NaN	NaN	NaN	NaN	NaN	NaN	NaN	NaN	NaN
O95822	MLYCD	Malonyl-CoA decarboxylase, mitochondrial	22748.4	29937	71385.4	20634.7	57971.8	16100.3	17610.9	23495.1	21863.3	23275.9	14964	21860.2	16555.2	NaN	19998.9	20510.4
Q96EY8	MMAB	Cob(I)yrinic acid a,c-diamide adenosyltransferase, mitochondrial	27456.2	45279.3	41589.3	36325.1	14534.9	21486.3	19990.5	30029.9	29474.3	30165.7	14123.8	36092.8	36630	23563.7	20661.5	20104.2
P08473	MME	Neprilysin	14785.1	20668.6	19544.7	15569.6	16284.3	17098.2	14345.5	8798.87	16107.8	14929.5	17062.9	16048.2	29223.3	15605.6	14325.2	13588.2
A0A0U1RRL7	MMP24OS	MMP24 opposite strand	87133.4	105653	160067	81446.9	67145.8	116005	62492.1	105274	109117	68891.9	60565.7	109830	79792.5	151719	86734.1	124951
Q9H8L6	MMRN2	Multimerin-2	16324.8	15773.5	231313	7596.43	20111.5	16295.3	8963.38	8274.47	12014.9	8311.66	10014.3	8154.82	10230.3	13876	10830.8	10071.3
Q5T454;Q96T76;Q96T76-5;Q96T76-7;Q96T76-8;Q96T76-9	MMS19	Isoform of Q96T76, MMS19 nucleotide excision repair protein homolog (Fragment);MMS19 nucleotide excision repair protein homolog;Isoform of Q96T76, Isoform 4 of MMS19 nucleotide excision repair protein homolog;Isoform of Q96T76, Isoform 2 of MMS19 nucleotide excision repair protein homolog;Isoform of Q96T76, Isoform 5 of MMS19 nucleotide excision repair protein homolog;Isoform of Q96T76, Isoform 6…	NaN	NaN	NaN	NaN	NaN	NaN	NaN	NaN	NaN	NaN	593.647	NaN	NaN	NaN	NaN	629.264
[truncated: 1,648 more rows]
