# Supplementary material for: High-intensity interval training remodels the proteome and acetylome of human skeletal muscle
Source: eLife. 2022 May 31;11:e69802. doi: 10.7554/eLife.69802 (PMC9154743; doi:10.7554/eLife.69802)
Supplement: Supplementary file 2. [file elife-69802-supp2.xlsx]

## Sheet: Supp_File2_Proteome_Quantified
ProteinAccessions	Genes	ProteinDescriptions	Pre_1	Pre_2	Pre_3	Pre_4	Pre_5	Pre_6	Pre_7	Pre_8	Post_1	Post_2	Post_3	Post_4	Post_5	Post_6	Post_7	Post_8	Student's T-test Significant Post_Pre	Student's T-test -Log10 p-value Post_Pre	Student's T-test q-value Post_Pre	Log2 Fold Change Post_Pre	Student's T-test Test statistic Post_Pre
H3BRQ4;K4DIB9;P50238	;;CRIP1	Uncharacterized protein (Fragment);Isoform of H3BRQ4. Uncharacterized protein (Fragment);Cysteine-rich protein 1	10.7889	12.5091	14.9022	14.6335	15.2574	14.0794	14.4281	12.4494	13.5084	14.0949	13.7866	14.9992	14.129	15.0731	14.365	13.2307		0.521405	0.562605	0.517366	1.1166		ProteinAccessions	UniProtKB Accession Numbers
A0A087WZ62;Q9H6U8;Q9H6U8-3	;ALG9;ALG9	Mannosyltransferase;Alpha-1.2-mannosyltransferase ALG9;Isoform of Q9H6U8. Isoform 3 of Alpha-1.2-mannosyltransferase ALG9	12.8335	12.2466	11.8061	10.5358	11.911	11.6172	11.5696	11.4774	11.7256	13.4821	12.8198	11.2677	11.7801	11.7609	11.7203	13.072		0.738502	0.427714	0.453904	1.47929		Genes	Gene name
F5H5P2;P12694;P12694-2	;BCKDHA;BCKDHA	Uncharacterized protein;2-oxoisovalerate dehydrogenase subunit alpha. mitochondrial;Isoform of P12694. Isoform 2 of 2-oxoisovalerate dehydrogenase subunit alpha. mitochondrial	13.8817	14.3365	14.6338	12.7994	13.8778	14.8298	14.1805	14.265	14.3283	14.7102	14.4706	14.2541	14.3936	14.3932	14.3007	14.4285		0.785858	0.400078	0.309348	1.55569		ProteinDescriptions	Protein names
C9JAW5;C9JNU6;Q9Y241;Q9Y241-2	;HIGD1A;HIGD1A;HIGD1A	Uncharacterized protein;Isoform of Q9Y241. HIG1 domain family member 1A. mitochondrial;HIG1 domain family member 1A. mitochondrial;Isoform of Q9Y241. Isoform 2 of HIG1 domain family member 1A. mitochondrial	18.3861	18.4231	17.3358	16.4705	16.7088	17.8828	16.7718	18.1409	18.8765	17.7369	18.3341	18.057	16.8198	17.4546	17.5224	17.7041		0.486902	0.585916	0.298209	1.05632		Values	Log2 Intensity
A0A0J9YY99;P01768;P0DP03	;IGHV3-30;IGHV3-30-5	Uncharacterized protein (Fragment);Immunoglobulin heavy variable 3-30;Immunoglobulin heavy variable 3-30-5	16.3564	16.0093	15.1663	14.9846	14.3323	13.4419	14.1631	10.4064	14.9086	13.5425	15.2404	11.8024	14.2292	13.6115	16.9303	14.2896		0.0151698	0.982122	-0.0381963	-0.0445981		Student's T-test Significant Post_Pre	FDR < 0.05 Post v Pre
E7EVH7;F8W6L3;G3V2E7;G3V3H3;G3V5R9;G5E9S8;Q07866;Q07866-10;Q07866-2;Q07866-3;Q07866-4;Q07866-5;Q07866-6;Q07866-7;Q07866-8;Q07866-9	;KLC1;KLC1;KLC1;KLC1;KLC1;KLC1;KLC1;KLC1;KLC1;KLC1;KLC1;KLC1;KLC1;KLC1;KLC1	Uncharacterized protein;Isoform of Q07866. Kinesin light chain 1;Isoform of Q07866. Kinesin light chain 1;Isoform of Q07866. Kinesin light chain 1;Isoform of Q07866. Kinesin light chain 1;Isoform of Q07866. Kinesin light chain 1;Kinesin light chain 1;Isoform of Q07866. Isoform D of Kinesin light chain 1;Isoform of Q07866. Isoform C of Kinesin light chain 1;Isoform of Q07866. Isoform G of Kinesin …	13.6547	13.6406	13.4364	13.1971	13.6253	13.3093	13.248	13.2148	13.3849	13.7678	13.1763	13.2703	13.84	14.138	13.5651	13.3078		0.536796	0.557265	0.140518	1.14321		Student's T-test -Log10 p-value Post_Pre	Paired t-test p-value Post v Pre (-Log10)
A0A096LPI6;A0A0B4J2D5;P30042	;LOC102724023;C21orf33	Uncharacterized protein (Fragment);Isoform of P30042. Uncharacterized protein;ES1 protein homolog. mitochondrial	20.3332	20.1202	19.9519	19.6799	19.4401	20.288	19.7575	19.9918	20.7168	20.3282	20.1487	20.3116	19.8841	20.748	20.2312	20.3432	+	3.9467	0.0195556	0.393672	7.73384		Student's T-test q-value Post_Pre	Paired t-test q-value Post v Pre (permutatioin-based FDR)
A0A087WV05;Q99417	;MYCBP	Isoform of C9IYK1. Uncharacterized protein;c-Myc-binding protein	14.2119	14.7582	14.6773	14.2552	14.3689	13.7623	12.4433	12.6246	12.5987	13.6127	13.496	14.5793	14.0189	13.3925	12.8238	12.6611		0.975352	0.309014	-0.489838	-1.85595		Log2 Fold Change Post_Pre	Paired t-test fold change Post v Pre (-Log2)
H0YC42;P55327;P55327-2;P55327-3;P55327-4;P55327-5;P55327-6;P55327-7	;TPD52;TPD52;TPD52;TPD52;TPD52;TPD52;TPD52	Uncharacterized protein;Tumor protein D52;Isoform of P55327. Isoform 2 of Tumor protein D52;Isoform of P55327. Isoform 3 of Tumor protein D52;Isoform of P55327. Isoform 4 of Tumor protein D52;Isoform of P55327. Isoform 5 of Tumor protein D52;Isoform of P55327. Isoform 6 of Tumor protein D52;Isoform of P55327. Isoform 7 of Tumor protein D52	14.543	14.1867	13.325	13.3351	14.429	14.3122	13.2616	13.9958	14.6922	14.1417	13.1436	13.6438	14.38	14.8917	13.721	14.5259		1.14182	0.247	0.218916	2.11605		Student's T-test Test statistic Post_Pre	Paired t-test test statistic Post v Pre
P04217	A1BG	Alpha-1B-glycoprotein	15.7542	16.0615	15.5722	15.7461	15.9797	15.3117	14.9589	15.1476	15.6009	15.1045	14.8256	15.6811	15.3777	15.8499	15.5036	15.4787		0.280105	0.739001	-0.138736	-0.669428
P01023	A2M	Alpha-2-macroglobulin	19.0079	19.5248	19.5033	19.1972	20.4824	20.4053	18.649	19.5915	18.6675	18.7145	19.4761	20.009	21.0227	20.4318	19.6553	20.6638		0.561172	0.54247	0.28493	1.18501
E9PNP3;Q9H7C9	AAMDC	Isoform of Q9H7C9. Mth938 domain-containing protein;Mth938 domain-containing protein	19.787	19.7137	19.6485	19.1778	19.4656	19.7376	19.8526	19.9376	20.1196	19.7906	19.6643	19.1305	19.725	19.6891	20.1838	20.1245		1.34898	0.196492	0.138385	2.43978
C9JEH3;C9JG97;Q13685	AAMP	Isoform of Q13685. Angio-associated migratory cell protein;Isoform of Q13685. Angio-associated migratory cell protein;Angio-associated migratory cell protein	13.0196	12.7252	13.3564	13.3402	13.2621	13.2243	13.0918	10.1197	13.2711	13.1217	12.3876	12.6988	13.1985	13.4321	13.5289	13.4066		0.346552	0.68664	0.363223	0.799556
P49588	AARS	Alanine--tRNA ligase. cytoplasmic	14.7133	14.6817	14.322	13.8943	14.198	15.1067	14.6671	14.7851	14.8549	14.0911	14.4441	14.3463	13.8788	14.7266	14.523	14.6886		0.379688	0.658406	-0.10184	-0.862131
Q9BTE6-2;Q9BTE6-3	AARSD1	Isoform of Q9BTE6. Isoform 2 of Alanyl-tRNA editing protein Aarsd1;Isoform of Q9BTE6. Isoform 3 of Alanyl-tRNA editing protein Aarsd1	15.0624	13.843	11.5215	14.6944	14.7515	14.1448	13.7151	13.4726	14.1223	13.9249	13.9635	14.1581	14.1222	14.9049	14.0156	14.8442		0.392108	0.647354	0.356294	0.885239
Q9NRN7	AASDHPPT	L-aminoadipate-semialdehyde dehydrogenase-phosphopantetheinyl transferase	14.4552	14.4846	14.0832	13.4377	13.6925	13.9977	12.916	14.5056	13.736	12.7657	13.2591	13.8485	12.5649	14.3264	13.5036	13.348		0.900445	0.346401	-0.527512	-1.73806
A0A0A0MSU4;O94911;O94911-3	ABCA8	Isoform of O94911. ATP-binding cassette sub-family A member 8;ATP-binding cassette sub-family A member 8;Isoform of O94911. Isoform 3 of ATP-binding cassette sub-family A member 8	12.3083	10.2695	13.5867	14.8469	13.9584	13.159	9.06956	11.1323	11.5592	11.317	10.6433	13.7033	13.4047	10.5419	13.0067	13.4484		0.0365283	0.961425	-0.0882736	-0.104988
A0A087WW65;O75027;O75027-2;O75027-3	ABCB7	Isoform of O75027. ATP-binding cassette sub-family B member 7. mitochondrial;ATP-binding cassette sub-family B member 7. mitochondrial;Isoform of O75027. Isoform 2 of ATP-binding cassette sub-family B member 7. mitochondrial;Isoform of O75027. Isoform 3 of ATP-binding cassette sub-family B member 7. mitochondrial	12.6234	11.4936	12.9038	10.5318	12.5142	12.9872	10.0481	12.352	12.3413	12.3757	12.2775	11.1536	12.2826	12.0543	10.4225	12.4037		0.0280093	0.974215	-0.0178362	-0.081218
O60706;O60706-2	ABCC9	ATP-binding cassette sub-family C member 9;Isoform of O60706. Isoform SUR2B of ATP-binding cassette sub-family C member 9	11.6303	10.7795	10.0991	10.582	10.8114	10.6063	9.95177	13.0504	11.7643	12.3157	11.0604	12.6505	12.5172	11.5295	10.7361	12.644		1.89743	0.087902	0.963363	3.32579
P61221	ABCE1	ATP-binding cassette sub-family E member 1	14.0576	14.0205	14.1317	13.4532	13.8274	13.7801	13.7329	13.7474	14.2364	13.9624	13.8072	14.3025	13.7878	13.7821	13.8229	14.0233		0.455411	0.606465	0.121736	1.00044
Q8NE71	ABCF1	ATP-binding cassette sub-family F member 1	13.6244	12.9631	13.7665	13.7341	13.8728	13.9754	13.3576	13.3903	14.0482	14.167	13.5084	13.6461	13.9129	13.986	13.9112	14.1518		0.997608	0.300642	0.330937	1.89083
C9JHK9;C9JZV3;Q9UG63;Q9UG63-2	ABCF2	Isoform of Q9UG63. ATP-binding cassette sub-family F member 2 (Fragment);Isoform of Q9UG63. ATP-binding cassette sub-family F member 2 (Fragment);ATP-binding cassette sub-family F member 2;Isoform of Q9UG63. Isoform 2 of ATP-binding cassette sub-family F member 2	10.7504	11.165	12.0386	11.2757	11.8188	10.8995	13.4236	10.1601	11.2705	11.839	10.5053	11.568	11.0612	10.6974	11.5652	11.4401		0.202207	0.812643	-0.198135	-0.50696
Q9NUJ1	ABHD10	Mycophenolic acid acyl-glucuronide esterase. mitochondrial	14.5225	14.1913	14.3602	14.2256	14.2417	14.3033	13.7724	14.3586	14.5714	14.3365	14.0414	14.2127	14.0847	14.8394	14.3414	14.098		0.235671	0.780857	0.0687377	0.578263
Q8NFV4;Q8NFV4-4	ABHD11	Protein ABHD11;Isoform of Q8NFV4. Isoform 4 of Protein ABHD11	13.629	13.9378	13.5695	13.9124	12.4492	14.256	13.1503	13.232	14.4045	13.2122	13.9757	13.1991	12.6892	13.2347	14.3918	13.9719		0.153908	0.856803	0.117859	0.399258
Q96IU4	ABHD14B	Protein ABHD14B	15.9311	16.192	15.9237	16.097	15.9607	15.7055	15.9265	15.8358	15.91	15.942	16.3236	16.0682	15.7438	15.6311	16.0559	15.9671		0.0407832	0.957726	0.0086782	0.11671
Q8WTS1	ABHD5	1-acylglycerol-3-phosphate O-acyltransferase ABHD5	14.0676	13.7575	11.2397	11.332	14.0695	14.533	10.0082	14.098	10.2034	13.751	14.3437	14.2609	14.1852	14.7058	13.8645	14.8135		0.460047	0.603685	0.8778	1.00872
D3YTG3;Q7Z7G0	ABI3BP	Isoform of Q7Z7G0. Target of Nesh-SH3;Target of Nesh-SH3	12.455	12.3751	11.5972	11.7762	14.2053	18.85	11.8898	11.6185	12.9606	11.0718	12.1946	14.7112	16.9998	13.6394	13.615	16.043		0.326527	0.702764	0.80853	0.761035
A0A0A0MRL6;F8W8M4;O14639;O14639-2;O14639-6	ABLIM1	Isoform of O14639. Actin-binding LIM protein 1;Isoform of O14639. Actin-binding LIM protein 1;Actin-binding LIM protein 1;Isoform of O14639. Isoform 2 of Actin-binding LIM protein 1;Isoform of O14639. Isoform 6 of Actin-binding LIM protein 1	12.6977	11.5467	12.9515	12.7898	13.182	12.77	12.8484	13.7106	12.4099	12.4155	12.6483	12.3264	12.3298	13.0641	11.9483	13.1239		0.64274	0.489887	-0.278801	-1.32226
Q6H8Q1-9	ABLIM2	Isoform of Q6H8Q1. Isoform 9 of Actin-binding LIM protein 2	15.3346	15.3957	15.3588	15.3456	15.4888	15.1568	15.2299	15.138	15.0058	15.0758	15.2396	15.077	15.1063	14.9283	15.2849	14.7108	+	2.58923	0.0409048	-0.252461	-4.56973
A0A0C4DGA7;O94929;O94929-2;O94929-3	ABLIM3	Isoform of O94929. Actin-binding LIM protein 3;Actin-binding LIM protein 3;Isoform of O94929. Isoform 2 of Actin-binding LIM protein 3;Isoform of O94929. Isoform 3 of Actin-binding LIM protein 3	10.2083	10.0422	12.1088	12.624	12.274	10.91	12.0105	12.7462	11.8639	11.7556	12.8144	11.7687	12.402	11.0612	12.4097	10.0182		0.107213	0.903271	0.146226	0.288604
Q8N0Z2	ABRA	Actin-binding Rho-activating protein	10.5254	11.3146	11.0522	10.6112	8.98723	11.4257	11.4489	10.374	10.7177	12.9845	11.4336	11.6405	14.1888	12.0625	11.2703	12.2646		1.22034	0.226053	1.35291	2.23852
Q5SZC9;Q9P1F3	ABRACL	Isoform of Q9P1F3. Costars family protein ABRACL;Costars family protein ABRACL	13.0449	13.1961	12.8865	13.8865	13.9431	12.1555	12.0218	12.1358	13.8288	13.2618	13.2596	12.8909	14.2616	14.542	13.4566	13.3684		1.03634	0.280437	0.699936	1.95144
Q15018	ABRAXAS2	BRISC complex subunit Abraxas 2	13.5428	13.5827	12.6328	13.2078	14.1536	13.69	13.3498	13.4168	13.595	13.4368	13.2533	13.3515	13.5307	13.3513	13.4281	13.5608		0.0224809	0.978362	-0.00857973	-0.0655711
P09110	ACAA1	3-ketoacyl-CoA thiolase. peroxisomal	15.3954	17.0838	15.7048	15.9543	15.0111	15.7873	14.8447	15.5276	15.9703	15.6286	15.5171	15.3414	15.9205	14.9483	15.2485	15.9918		0.120291	0.891262	-0.0927956	-0.320329
A0A0B4J2A4;P42765	ACAA2	Isoform of P42765. 3-ketoacyl-CoA thiolase. mitochondrial;3-ketoacyl-CoA thiolase. mitochondrial	19.65	19.6914	19.745	18.9647	18.8183	20.1589	19.3604	19.8759	19.8718	19.7268	19.6792	19.9877	19.3766	19.638	20.0286	19.9386		0.718401	0.440932	0.247836	1.44664
Q9UKU7	ACAD8	Isobutyryl-CoA dehydrogenase. mitochondrial	15.941	15.9087	16.3215	15.8404	16.0401	16.1547	15.7363	15.9802	15.9367	16.2369	16.0964	16.1633	16.0715	15.4042	16.1034	16.2441		0.115753	0.895235	0.0416993	0.309389
Q9H845	ACAD9	Acyl-CoA dehydrogenase family member 9. mitochondrial	10.1755	12.4342	14.4121	13.2836	14.2744	13.4482	13.9104	14.0304	11.4344	14.1009	13.3599	13.8951	13.4588	13.6873	12.6815	13.9988		0.0774395	0.922413	0.0809917	0.213953
P11310;P11310-2;Q5T4U5	ACADM	Medium-chain specific acyl-CoA dehydrogenase. mitochondrial;Isoform of P11310. Isoform 2 of Medium-chain specific acyl-CoA dehydrogenase. mitochondrial;Isoform of P11310. Acyl-Coenzyme A dehydrogenase. C-4 to C-12 straight chain. isoform CRA_a	20.3269	20.0797	20.3254	20.0233	19.8902	20.7464	19.9305	20.3443	20.5485	20.0329	20.2314	20.6703	20.357	20.2606	20.4885	20.203		0.455829	0.606804	0.140672	1.00118
P16219	ACADS	Short-chain specific acyl-CoA dehydrogenase. mitochondrial	18.5032	19.0258	19.6589	18.5236	18.5253	19.3188	18.8826	19.3594	18.4838	19.3879	19.0558	18.8686	18.6443	18.6991	19.3136	19.4821		0.0408574	0.95818	0.0171921	0.116914
P45954	ACADSB	Short/branched chain specific acyl-CoA dehydrogenase. mitochondrial	15.2976	15.75	16.2954	15.8696	16.1438	16.3821	16.1299	16.1587	15.3706	16.1814	15.9695	16.0472	16.097	15.9598	16.2727	15.944		0.0832359	0.918291	-0.0231193	-0.228768
P49748;P49748-3	ACADVL	Very long-chain specific acyl-CoA dehydrogenase. mitochondrial;Isoform of P49748. Isoform 3 of Very long-chain specific acyl-CoA dehydrogenase. mitochondrial	19.4942	19.5136	19.2115	18.9183	18.9138	19.8679	19.1397	19.6374	19.7381	19.523	19.637	19.6664	19.264	19.5846	19.8853	19.7229		1.2624	0.216695	0.290588	2.3042
P24752	ACAT1	Acetyl-CoA acetyltransferase. mitochondrial	20.8088	21.1163	21.9736	21.3614	21.2312	21.5951	20.7645	21.1811	21.1487	21.8445	21.365	21.9389	21.4904	21.1096	21.2158	21.5437		0.558308	0.544154	0.203046	1.18012
Q9BWD1;Q9BWD1-2	ACAT2	Acetyl-CoA acetyltransferase. cytosolic;Isoform of Q9BWD1. Isoform 2 of Acetyl-CoA acetyltransferase. cytosolic	14.0563	14.31	15.0086	14.7692	14.7	13.6141	14.8074	13.0831	14.5169	15.146	13.444	14.3155	14.9966	13.4836	14.1248	13.749		0.0921304	0.913397	-0.0715178	-0.251228
Q9H3P7	ACBD3	Golgi resident protein GCP60	14.0501	13.7388	14.3327	13.8752	14.0323	13.9391	13.4992	13.7084	14.1707	13.7348	13.6117	13.9164	13.8043	14.0601	13.7696	15.4115		0.277762	0.741343	0.162925	0.66471
B7Z2R7;Q5T8D3;Q5T8D3-2;Q5T8D3-3;Q5T8D3-4	ACBD5	Isoform of Q5T8D3. Acyl-CoA-binding domain-containing protein 5;Acyl-CoA-binding domain-containing protein 5;Isoform of Q5T8D3. Isoform 2 of Acyl-CoA-binding domain-containing protein 5;Isoform of Q5T8D3. Isoform 3 of Acyl-CoA-binding domain-containing protein 5;Isoform of Q5T8D3. Isoform 4 of Acyl-CoA-binding domain-containing protein 5	15.9314	11.8873	14.4395	11.7846	10.5332	12.1667	11.1452	15.9177	11.7799	17.6743	11.5193	18.7336	17.9829	12.5219	11.72	10.6419		0.250175	0.768112	1.09602	0.608434
E7EQT4;Q9UKV3;Q9UKV3-5;S4R3H4	ACIN1	Isoform of Q9UKV3. Apoptotic chromatin condensation inducer in the nucleus;Apoptotic chromatin condensation inducer in the nucleus;Isoform of Q9UKV3. Isoform 4 of Apoptotic chromatin condensation inducer in the nucleus;Isoform of Q9UKV3. Apoptotic chromatin condensation inducer in the nucleus	13.3482	13.4429	13.211	13.7742	13.6377	13.7445	13.9209	13.6226	13.8803	11.0629	13.833	14.2975	13.683	14.2439	13.6614	13.6105		0.0541168	0.946973	-0.0536629	-0.152833
P53396;P53396-2	ACLY	ATP-citrate synthase;Isoform of P53396. Isoform 2 of ATP-citrate synthase	12.2382	16.7376	17.3925	16.8596	13.9913	11.7506	17.4271	11.9223	15.6151	13.1872	17.7076	14.3968	13.1038	17.5491	17.388	13.6122		0.195011	0.819367	0.53009	0.491294
P21399	ACO1	Cytoplasmic aconitate hydratase	16.2776	16.392	16.7209	16.2171	16.4224	16.7832	16.1301	16.4591	16.7324	16.2979	15.9231	16.2888	16.5405	16.5379	15.795	15.9183		0.581309	0.530517	-0.171048	-1.21925
Q99798	ACO2	Aconitate hydratase. mitochondrial	21.6539	20.9877	21.6637	20.9771	21.0257	21.4785	20.9904	21.2435	21.8618	21.7522	21.4583	21.6201	21.4381	20.7605	21.0022	21.4178		0.431158	0.618936	0.161285	0.956782
Q9NPJ3	ACOT13	Acyl-coenzyme A thioesterase 13	15.6468	15.8916	15.4724	15.5003	15.351	15.8397	15.7304	15.8051	15.9606	15.9157	16.2866	15.8545	15.7201	15.4669	15.7939	16.1704		1.05371	0.274637	0.241424	1.97858
A0A087WT95;A0A087X0W7;P49753;Q86TX2	ACOT2;ACOT2;ACOT2;ACOT1	Isoform of P49753. Acyl-coenzyme A thioesterase 2. mitochondrial;Isoform of P49753. Acyl-coenzyme A thioesterase 2. mitochondrial;Acyl-coenzyme A thioesterase 2. mitochondrial;Acyl-coenzyme A thioesterase 1	18.9111	19.3658	19.9638	19.2233	19.0853	19.6332	18.6883	19.4007	19.3363	19.5946	19.2559	19.7517	18.9749	18.7254	18.5828	19.5536		0.128959	0.881351	-0.0620403	-0.341029
Q9Y305;Q9Y305-2;Q9Y305-4	ACOT9	Acyl-coenzyme A thioesterase 9. mitochondrial;Isoform of Q9Y305. Isoform 2 of Acyl-coenzyme A thioesterase 9. mitochondrial;Isoform of Q9Y305. Isoform 4 of Acyl-coenzyme A thioesterase 9. mitochondrial	14.2367	14.3061	13.9034	13.9767	14.1452	14.0633	13.7685	14.5995	14.063	14.3915	14.3394	15.389	14.8613	13.8406	13.9406	14.3468		0.655676	0.483487	0.271603	1.34371
P24666	ACP1	Low molecular weight phosphotyrosine protein phosphatase	17.8483	17.7895	17.9703	18.7906	17.9492	18.5185	17.8335	17.7592	17.789	17.6504	17.6239	18.7475	17.9063	18.3958	17.8971	17.6889		1.23912	0.2231	-0.0950437	-2.26783
Q96CM8;Q96CM8-2;Q96CM8-3	ACSF2	Acyl-CoA synthetase family member 2. mitochondrial;Isoform of Q96CM8. Isoform 2 of Acyl-CoA synthetase family member 2. mitochondrial;Isoform of Q96CM8. Isoform 3 of Acyl-CoA synthetase family member 2. mitochondrial	14.7421	14.8579	14.9146	14.5892	14.6675	14.5879	14.4195	14.9401	15.241	15.0379	14.9197	15.2118	15.1463	13.8769	14.8121	14.8887		0.544648	0.551949	0.176926	1.15672
F5H5A1;Q4G176	ACSF3	Isoform of Q4G176. Acyl-CoA synthetase family member 3. mitochondrial;Acyl-CoA synthetase family member 3. mitochondrial	13.8383	14.1525	14.2236	11.1936	10.9217	13.5723	13.0605	11.5275	13.2707	13.4701	13.5343	13.5621	13.868	11.4256	14.4375	14.8747		0.476001	0.592365	0.744132	1.03707
P33121	ACSL1	Long-chain-fatty-acid--CoA ligase 1	18.3844	18.4936	18.2483	17.8865	17.8796	18.8529	18.2504	18.3994	19.163	18.9174	18.5115	19.0363	18.6443	18.2525	18.6663	18.6147		1.27402	0.214953	0.426353	2.32237
O95573	ACSL3	Long-chain-fatty-acid--CoA ligase 3	13.83	13.7202	13.7083	13.3891	13.6765	13.4483	14.0323	13.5436	13.797	14.0921	13.7166	13.8827	13.4886	13.4141	14.4323	13.2246		0.36315	0.66937	0.0874574	0.831074
Q9NUB1;Q9NUB1-2	ACSS1	Acetyl-coenzyme A synthetase 2-like. mitochondrial;Isoform of Q9NUB1. Isoform 2 of Acetyl-coenzyme A synthetase 2-like. mitochondrial	14.1006	14.1348	14.4365	13.224	14.1376	15.6735	13.5061	14.7836	14.5864	14.5112	14.0471	14.2628	14.4644	14.4219	14.0981	14.1658		0.0969418	0.909538	0.0701289	0.263246
Q9NR19;Q9NR19-2	ACSS2	Acetyl-coenzyme A synthetase. cytoplasmic;Isoform of Q9NR19. Isoform 2 of Acetyl-coenzyme A synthetase. cytoplasmic	13.6184	14.2352	14.0525	13.1083	12.8555	14.5056	14.1771	13.9404	14.1727	14.2598	13.7401	14.3668	14.4306	13.7268	14.2866	14.0466		0.537871	0.556335	0.317136	1.14506
A0A0B4J1R2;Q9H6R3	ACSS3	Isoform of Q9H6R3. Acyl-CoA synthetase short-chain family member 3. mitochondrial;Acyl-CoA synthetase short-chain family member 3. mitochondrial	14.0894	18.3549	12.9615	14.5289	11.727	11.5721	11.2868	9.78526	14.0093	16.3832	15.5237	13.8322	14.0292	10.1511	11.0738	11.9322		0.209921	0.807759	0.328605	0.523618
P68133	ACTA1	Actin. alpha skeletal muscle	25.1443	25.3516	24.4207	24.9284	24.8138	24.9556	25.2494	25.0151	24.8265	24.8724	25.1745	21.8084	24.6818	24.3944	24.8748	24.6428		0.73195	0.432346	-0.575401	-1.46866
P62736	ACTA2	Actin. aortic smooth muscle	13.4777	13.5275	10.191	11.7098	14.6623	14.7584	14.9269	15.418	14.7201	13.8903	16.5055	16.092	14.1782	15.7081	15.0239	10.6454		0.381474	0.656908	1.01148	0.865466
P60709	ACTB	Actin. cytoplasmic 1	22.7265	22.7953	20.5491	22.9201	20.6769	22.1015	22.9469	22.9351	22.5936	22.8285	22.9459	22.7347	20.6757	22.4152	22.7348	22.1503		0.213732	0.806064	0.178406	0.531797
Q562R1	ACTBL2	Beta-actin-like protein 2	20.7461	22.2327	21.977	21.712	19.9903	22.5608	22.7867	21.9508	22.6345	20.9722	22.9685	20.7627	22.7201	21.2767	22.5659	22.0598		0.186723	0.826921	0.250484	0.473093
P68032	ACTC1	Actin. alpha cardiac muscle 1	26.3698	27.9793	28.108	27.9425	28.1942	28.1079	28.039	28.0271	27.8613	28.0463	28.0466	28.004	27.9162	27.6438	27.924	28.0683		0.172548	0.839523	0.0928328	0.441556
P63261	ACTG1	Actin. cytoplasmic 2	19.4417	19.5022	18.6692	18.5764	19.1807	18.6829	18.4046	18.8461	19.2598	18.9322	18.7643	18.9242	19.3582	19.8419	18.9298	18.6132		0.388478	0.650947	0.164982	0.878504
P12814-2;P12814-3;P12814-4	ACTN1	Isoform of P12814. Isoform 2 of Alpha-actinin-1;Isoform of P12814. Isoform 3 of Alpha-actinin-1;Isoform of P12814. Isoform 4 of Alpha-actinin-1	21.3306	21.5274	21.8315	21.802	21.8881	21.7263	22.3559	21.9943	21.5356	22.0244	21.9865	21.3476	21.7148	21.2482	21.6879	21.5819		0.53944	0.556198	-0.166153	-1.14776
P35609	ACTN2	Alpha-actinin-2	22.8944	22.959	23.2486	23.0661	23.3123	23.1568	23.5378	23.2165	22.6204	23.4205	23.1979	22.5482	22.9556	22.5893	23.0923	23.0361		1.10254	0.261066	-0.241404	-2.05479
Q08043	ACTN3	Alpha-actinin-3	19.1232	15.9388	19.4473	20.6741	20.5194	18.8606	14.7327	20.0602	18.8704	14.4513	19.1762	20.0352	19.8055	17.8321	14.3894	19.376	+	2.58139	0.0393636	-0.677544	-4.55456
O43707	ACTN4	Alpha-actinin-4	19.3556	19.2537	19.5162	19.658	19.7403	19.9099	20.2779	19.6572	19.1084	20.1439	20.0333	19.3082	19.5503	19.2088	19.9473	19.9843		0.0191249	0.979718	-0.0105438	-0.0559843
Q9NZ32;V9GYX7	ACTR10	Actin-related protein 10;Isoform of Q9NZ32. Actin-related protein 10 (Fragment)	11.2338	10.4783	9.51699	11.9439	12.7419	12.0808	20.5159	21.8585	12.1008	12.1098	11.8226	12.189	20.8316	10.5687	10.6345	11.9528		0.185245	0.826839	-1.02003	-0.469827
P61163;R4GMT0	ACTR1A	Alpha-centractin;Isoform of P61163. Alpha-centractin	16.3375	14.9456	15.5411	15.6741	15.4398	15.6829	15.391	15.4997	15.625	15.11	15.3288	15.273	15.5328	15.3456	14.932	15.0304		1.56932	0.146232	-0.291761	-2.78872
P42025	ACTR1B	Beta-centractin	16.5466	15.5301	16.8522	16.1485	16.2802	16.1887	15.6887	10.7992	16.27	16.2827	15.7338	16.0452	10.013	16.4352	15.8074	15.7221		0.0720044	0.928095	-0.215595	-0.199931
P61160;P61160-2	ACTR2	Actin-related protein 2;Isoform of P61160. Isoform 2 of Actin-related protein 2	14.8322	15.064	14.5803	15.0873	14.323	14.8255	14.1519	14.0101	14.854	14.8924	14.3911	14.6808	15.2547	14.6193	14.8009	15.1204		0.481279	0.588941	0.217413	1.0464
P61158	ACTR3	Actin-related protein 3	15.7406	15.5349	14.839	13.8452	14.7024	15.1985	14.6606	14.8175	15.4639	14.7834	15.151	14.8482	15.0789	15.0178	15.1354	14.9752		0.313145	0.711035	0.139379	0.73497
A0A1B0GU86;Q03154	ACY1	Isoform of Q03154. Aminoacylase-1;Aminoacylase-1	17.5171	17.4302	17.1412	17.5458	17.1251	17.8322	17.5673	17.5968	18.0236	17.7419	17.2249	17.6048	17.4498	17.835	17.5855	17.7449		1.61002	0.136428	0.181854	2.85404
G3V2U7;P07311	ACYP1	Isoform of P07311. Acylphosphatase;Acylphosphatase-1	9.71829	10.6578	13.2857	10.9539	13.5685	12.8151	13.0335	10.1094	12.9596	12.6425	13.0006	13.1495	13.3726	11.1359	10.4099	12.8299		0.385955	0.654465	0.669772	0.873814
P14621	ACYP2	Acylphosphatase-2	18.8049	18.6701	19.0497	19.4139	19.0435	19.2668	18.9776	19.1172	18.9686	18.6956	19.1976	19.5221	19.2432	19.189	18.9924	19.1236		1.18069	0.23444	0.0735445	2.17667
F5GWI4;P00813	ADA	Isoform of P00813. Adenosine deaminase;Adenosine deaminase	11.598	11.4212	11.6949	11.5152	12.1143	16.5382	11.7213	15.988	15.9697	16.5643	11.8792	17.2539	12.6107	14.4309	12.7514	12.4503		0.557105	0.544153	1.41489	1.17806
Q6DHV7;Q6DHV7-2	ADAL	Adenosine deaminase-like protein;Isoform of Q6DHV7. Isoform 2 of Adenosine deaminase-like protein	13.8703	13.9713	13.3637	12.4748	13.3428	13.7393	13.1951	13.2433	13.7992	12.9706	13.3187	12.8281	13.2835	13.4776	13.4132	13.4496		0.224226	0.793225	-0.0824966	-0.554153
E7ENY0;E7EV99;P35611;P35611-2;P35611-3;P35611-6	ADD1	Isoform of P35611. Alpha-adducin;Isoform of P35611. Alpha-adducin;Alpha-adducin;Isoform of P35611. Isoform 2 of Alpha-adducin;Isoform of P35611. Isoform 3 of Alpha-adducin;Isoform of P35611. Isoform 6 of Alpha-adducin	14.3059	14.1151	14.2977	14.4243	14.2817	14.3515	13.9263	13.6002	14.3819	14.0282	13.9083	14.4558	14.562	14.3721	14.4606	14.2897		0.55854	0.544168	0.144485	1.18051
P35612	ADD2	Beta-adducin	14.075	13.8019	13.4162	14.5253	13.8684	13.5347	13.356	13.0463	12.6527	12.764	12.7287	13.1969	13.5942	14.1973	14.0351	12.8387		0.786548	0.40038	-0.45203	-1.55679
Q9UEY8;Q9UEY8-2	ADD3	Gamma-adducin;Isoform of Q9UEY8. Isoform 1 of Gamma-adducin	11.3122	16.9392	12.3009	16.3555	17.7433	11.4087	17.0883	14.5407	13.8275	14.1191	15.9774	15.1042	15.4978	13.6341	14.7559	13.3344		0.0714146	0.927628	-0.179803	-0.198401
P00325;V9HW50	ADH1B;HEL-S-117	Alcohol dehydrogenase 1B;Isoform of P00325. Alcohol dehydrogenase 1B	16.5487	16.6186	17.5732	17.1922	16.7964	15.65	17.0735	16.783	16.4218	16.6488	17.2409	17.1204	15.9813	15.1573	17.3731	16.5171		0.970871	0.311088	-0.221875	-1.84892
P00326	ADH1C	Alcohol dehydrogenase 1C	10.6578	12.2664	10.8393	9.76559	12.3573	11.9565	10.22	9.51672	11.8729	10.8399	10.8782	11.2077	11.8836	9.9033	10.7769	11.4737		0.117844	0.893425	0.157078	0.314438
P11766	ADH5	Alcohol dehydrogenase class-3	17.418	17.4204	17.83	17.4335	17.6302	17.4964	17.248	16.9344	17.2792	17.1498	16.8959	17.4707	17.2618	16.9634	17.0164	16.9579		1.50122	0.158471	-0.301973	-2.68011
Q8IWW8;Q8IWW8-2	ADHFE1	Hydroxyacid-oxoacid transhydrogenase. mitochondrial;Isoform of Q8IWW8. Isoform 2 of Hydroxyacid-oxoacid transhydrogenase. mitochondrial	15.8616	15.8298	15.3037	14.116	15.5766	15.7009	14.8659	14.3569	16.419	15.434	14.7712	15.4568	16.0799	15.3017	14.9358	14.5729		0.32743	0.702987	0.170001	0.762784
Q9BV57	ADI1	1.2-dihydroxy-3-keto-5-methylthiopentene dioxygenase	13.2638	13.5744	13.1681	13.0008	13.1802	13.7208	13.135	13.613	12.8772	12.9283	13.6981	13.2698	12.9504	13.5316	13.8777	12.9237		0.153047	0.85811	-0.0749025	-0.39728
Q15848	ADIPOQ	Adiponectin	15.9144	16.0908	16.5867	15.9878	16.2175	16.0438	15.7249	15.9554	16.0618	15.8833	15.6666	16.0152	16.1291	15.8942	15.8857	16.105		0.384622	0.655785	-0.110076	-0.871333
Q15847	ADIRF	Adipogenesis regulatory factor	16.3537	16.6198	15.5231	16.0186	15.4902	15.6397	15.6136	15.5967	16.1383	15.8806	15.6356	15.7112	15.9817	16.479	16.4752	15.7918		0.333639	0.698042	0.154771	0.774779
P55263;P55263-3	ADK	Adenosine kinase;Isoform of P55263. Isoform 3 of Adenosine kinase	14.6073	14.2548	14.9253	14.3667	14.6923	14.8059	14.5097	14.35	14.9201	14.3557	14.6239	14.5457	14.6674	14.6601	14.2019	14.6922		0.0771801	0.922784	0.0193648	0.213287
Q96SZ5	ADO	2-aminoethanethiol dioxygenase	9.88099	11.5251	9.35578	10.4049	12.5673	11.2819	12.7588	11.1273	11.9646	12.7859	9.00369	13.0021	12.8176	10.2701	10.5441	12.8698		0.413015	0.635082	0.544488	0.923746
A0A0U1RQK4	ADPRHL1	Isoform of Q8NDY3. [Protein ADP-ribosylarginine] hydrolase-like protein 1	18.7756	18.8903	18.4553	18.7845	18.8289	18.6533	17.7951	18.8544	18.7724	18.8565	18.15	18.8176	18.6982	18.2442	17.6437	18.6369		1.58097	0.144076	-0.152229	-2.80739
Q9NX46	ADPRHL2	Poly(ADP-ribose) glycohydrolase ARH3	16.8794	15.591	15.9906	15.8474	15.9093	15.9746	15.7028	15.5305	15.8257	15.4931	15.4608	15.6021	15.9226	15.9382	15.5617	15.5259		1.0861	0.264939	-0.261945	-2.02914
A0A087WX59;Q16186	ADRM1	Isoform of Q16186. Proteasomal ubiquitin receptor ADRM1;Proteasomal ubiquitin receptor ADRM1	16.3952	15.4293	16.1165	15.9932	16.2522	16.0772	15.8707	15.8642	16.0387	15.5031	15.4646	15.9723	15.9952	15.9558	16.1234	16.0059		0.525111	0.561239	-0.117431	-1.12303
A0A1B0GTJ7;A0A1B0GWJ0;P30566	ADSL	Isoform of P30566. Adenylosuccinate lyase;Isoform of P30566. Adenylosuccinate lyase;Adenylosuccinate lyase	18.0574	18.0522	17.9963	18.1683	18.0942	18.1046	18.0232	18.1168	18.0959	18.0892	17.4054	17.9055	17.9951	17.209	17.7235	18.0787		1.23022	0.222846	-0.263844	-2.25394
P30520	ADSS	Adenylosuccinate synthetase isozyme 2	11.9259	12.1387	11.1464	13.2123	13.367	10.0546	13.285	12.7993	13.4167	13.2418	12.7521	13.0766	13.2562	13.4799	13.4604	13.0399		1.2434	0.222256	0.974321	2.27452
Q8N142	ADSSL1	Adenylosuccinate synthetase isozyme 1	19.4224	19.5475	19.7184	19.2313	19.5699	19.739	18.7676	19.2566	19.7039	19.5994	19.0484	19.2715	19.4115	18.7549	18.8941	19.4353		0.395768	0.645529	-0.141706	-0.892015
A8MQ02;J3KN01;P55196;P55196-5	AFDN	Isoform of P55196. Afadin;Isoform of P55196. Afadin;Afadin;Isoform of P55196. Isoform 5 of Afadin	11.0365	11.7939	15.9722	17.4636	16.1914	13.2484	15.5504	13.2319	13.405	12.7715	12.9098	13.318	15.1783	11.3156	9.59041	12.8299		0.882756	0.352017	-1.64622	-1.71009
Q9Y4W6	AFG3L2	AFG3-like protein 2	14.9543	14.6092	14.477	13.7043	13.9452	14.7379	14.2374	14.9663	15.2385	14.6286	14.9825	14.8844	14.3677	14.8924	15.0695	15.2961		1.99755	0.0772582	0.466004	3.4953
P43652	AFM	Afamin	12.7499	12.2324	11.7077	12.4714	12.4314	12.9421	12.3122	12.8587	12.9319	13.0926	13.4611	12.6943	13.2652	13.6372	13.518	13.4268	+	2.46839	0.0455146	0.790169	4.33881
E9PR59;E9PRJ1;F6U0I4;H9KV53;Q5U5Z8	AGBL2	Isoform of Q5U5Z8. Cytosolic carboxypeptidase 2 (Fragment);Isoform of Q5U5Z8. Cytosolic carboxypeptidase 2 (Fragment);Isoform of Q5U5Z8. Cytosolic carboxypeptidase 2;Isoform of Q5U5Z8. Cytosolic carboxypeptidase 2;Cytosolic carboxypeptidase 2	10.5434	11.6187	14.4918	15.3215	9.39829	13.7643	14.6736	13.9017	13.8237	14.0525	14.8657	9.2778	13.3458	12.8391	13.8313	11.3593		0.0114965	0.985339	-0.0397804	-0.0339359
P52594;P52594-2;P52594-3;P52594-4	AGFG1	Arf-GAP domain and FG repeat-containing protein 1;Isoform of P52594. Isoform 2 of Arf-GAP domain and FG repeat-containing protein 1;Isoform of P52594. Isoform 3 of Arf-GAP domain and FG repeat-containing protein 1;Isoform of P52594. Isoform 4 of Arf-GAP domain and FG repeat-containing protein 1	14.7428	14.3394	14.7111	14.411	14.7834	10.8316	10.6122	12.5072	13.9245	9.65911	8.92614	14.5473	10.9266	15.1691	14.4106	10.5284		0.365045	0.668743	-1.10587	-0.834649
Q53H12	AGK	Acylglycerol kinase. mitochondrial	9.92361	10.3963	11.4308	9.59441	10.6485	14.5842	10.9737	14.5034	14.2314	13.8948	13.2487	13.0781	12.0101	14.0429	13.2364	13.7131		1.64571	0.12897	1.92509	2.91158
P35573	AGL	Glycogen debranching enzyme	19.6314	19.2261	19.2031	19.6108	19.6549	19.1356	19.2275	19.4181	19.7312	19.621	19.2095	19.1252	19.7215	18.6859	19.0813	19.7808		0.0576203	0.942864	-0.0188742	-0.162176
Q9BSE5	AGMAT	Agmatinase. mitochondrial	15.6327	16.973	17.5135	17.0136	16.7802	16.038	16.6814	17.2935	15.4681	17.0475	17.1884	16.7236	17.1383	15.8204	17.4842	17.5955		0.190971	0.823146	0.0675319	0.482442
Q9UKV8;Q9UKV8-2	AGO2	Protein argonaute-2;Isoform of Q9UKV8. Isoform 2 of Protein argonaute-2	18.8169	18.8541	12.9539	19.0517	14.3094	14.2187	18.7228	18.6462	18.8369	18.7019	18.8067	18.6516	19.5259	19.3709	19.5573	18.6091		1.11935	0.255671	2.06082	2.08102
O00116	AGPS	Alkyldihydroxyacetonephosphate synthase. peroxisomal	13.6409	9.47262	13.8916	12.9616	13.9449	12.3543	10.454	10.8309	14.5591	10.594	13.0284	10.3119	10.1823	14.1814	12.979	12.893		0.0640798	0.934993	0.1473	0.179249
A0A087X208;O00468;O00468-2;O00468-3;O00468-4;O00468-5;O00468-6;O00468-7	AGRN	Isoform of O00468. Agrin;Agrin;Isoform of O00468. Isoform 2 of Agrin;Isoform of O00468. Isoform 3 of Agrin;Isoform of O00468. Isoform 4 of Agrin;Isoform of O00468. Isoform 5 of Agrin;Isoform of O00468. Isoform 6 of Agrin;Isoform of O00468. Isoform 7 of Agrin	11.5419	11.3125	9.62167	10.1555	10.6252	10.5331	9.06409	10.2459	11.3545	11.5364	10.033	12.9064	10.5577	10.5869	10.7059	11.2072		1.07334	0.268343	0.723505	2.00923
P01019	AGT	Angiotensinogen	15.9561	15.9789	13.3405	14.0809	16.3739	15.8039	13.5784	15.409	15.7417	13.8097	14.5495	13.64	16.2934	14.5943	15.8895	15.7603		0.021336	0.978783	-0.0304047	-0.0623081
Q8WYP5;Q8WYP5-2;Q8WYP5-3	AHCTF1	Protein ELYS;Isoform of Q8WYP5. Isoform 2 of Protein ELYS;Isoform of Q8WYP5. Isoform 3 of Protein ELYS	14.5781	9.60745	9.90233	11.2781	11.3424	14.0787	14.7069	15.1147	14.6509	14.7616	14.6325	10.6705	14.9257	10.8758	14.2425	15.4839		0.542149	0.555045	1.20435	1.15242
P23526	AHCY	Adenosylhomocysteinase	17.3092	17.469	17.2133	17.1163	17.2509	17.6539	17.2888	17.035	17.3563	17.1782	16.9738	17.3607	17.4222	17.3839	17.5157	17.2971		0.0789075	0.921239	0.0189321	0.217719
O43865	AHCYL1	S-adenosylhomocysteine hydrolase-like protein 1	11.2821	11.0754	11.2478	10.2643	10.2687	10.1167	11.7782	14.0051	12.0117	11.7952	10.1176	11.1473	11.6757	11.5085	12.4955	12.8992		0.608705	0.51063	0.451547	1.26544
Q96HN2;Q96HN2-2	AHCYL2	Adenosylhomocysteinase 3;Isoform of Q96HN2. Isoform 2 of Adenosylhomocysteinase 3	14.0793	14.111	16.8604	16.1808	17.4251	14.2542	15.7445	13.7446	13.9295	15.5118	13.5048	15.6986	16.8279	13.4151	13.926	13.9089		0.70657	0.449626	-0.709655	-1.42735
Q09666	AHNAK	Neuroblast differentiation-associated protein AHNAK	18.4865	18.6032	18.2425	17.9462	18.6203	18.6157	18.136	17.7792	18.7768	18.2866	17.983	18.4335	18.7144	19.7922	18.9265	18.6143		1.0971	0.262471	0.387204	2.0463
O95433;O95433-2	AHSA1	Activator of 90 kDa heat shock protein ATPase homolog 1;Isoform of O95433. Isoform 2 of Activator of 90 kDa heat shock protein ATPase homolog 1	15.2242	15.1834	15.4754	14.6569	15.111	14.3826	14.5558	14.6518	14.9952	15.0328	14.9299	15.0391	14.8048	14.7803	14.9101	14.2829		0.169541	0.842558	-0.0582515	-0.434798
C9JV77;P02765	AHSG	Isoform of P02765. Alpha-2-HS-glycoprotein;Alpha-2-HS-glycoprotein	17.8435	17.468	17.6579	17.3082	17.7349	17.2599	16.6467	16.4718	17.3712	16.907	16.8294	16.9008	17.7645	17.876	17.1984	17.0338		0.116206	0.895281	-0.0637164	-0.310484
Q9NZD4	AHSP	Alpha-hemoglobin-stabilizing protein	16.9138	16.7753	15.7435	15.8487	16.2961	16.1192	15.1677	14.1693	15.2061	15.4885	14.602	14.9642	16.1565	16.4637	15.7988	15.3871		0.459769	0.603649	-0.370853	-1.00822
Q96BJ3;Q96BJ3-3	AIDA	Axin interactor. dorsalization-associated protein;Isoform of Q96BJ3. Isoform 3 of Axin interactor. dorsalization-associated protein	10.9495	10.9021	9.11973	12.445	10.3779	11.0303	11.2053	9.10081	11.2544	11.6291	9.75325	10.883	11.7983	12.0265	10.6269	11.2411		0.60053	0.520526	0.510238	1.2517
O95831;O95831-3	AIFM1	Apoptosis-inducing factor 1. mitochondrial;Isoform of O95831. Isoform 3 of Apoptosis-inducing factor 1. mitochondrial	18.7711	18.4182	18.2571	18.066	18.0288	18.4809	18.1532	18.6846	19.156	18.6817	18.3273	18.7729	18.5823	18.121	18.333	18.7861		1.10186	0.260924	0.237572	2.05374
Q12904;Q12904-2	AIMP1	Aminoacyl tRNA synthase complex-interacting multifunctional protein 1;Isoform of Q12904. Isoform 2 of Aminoacyl tRNA synthase complex-interacting multifunctional protein 1	15.3986	16.7852	15.9612	15.7194	15.6391	15.491	15.075	15.1696	15.4131	15.1761	15.345	15.6862	15.1633	15.3533	15.3958	15.2225		0.723559	0.437669	-0.310483	-1.45503
Q13155	AIMP2	Aminoacyl tRNA synthase complex-interacting multifunctional protein 2	14.9475	14.7608	15.0336	15.1803	14.9864	14.2105	13.7211	13.6753	14.0502	14.3176	14.037	14.284	13.6365	13.3668	13.979	13.8904		1.7036	0.122039	-0.619227	-3.00549
O00170	AIP	AH receptor-interacting protein	10.8176	10.1903	10.4223	11.1279	10.386	10.7943	10.7586	13.0937	13.2281	13.9439	12.4601	10.6774	10.6407	13.2515	11.1833	10.1054		0.637222	0.493357	0.987436	1.31309
P00568;Q5T9B7	AK1	Adenylate kinase isoenzyme 1;Isoform of P00568. Adenylate kinase isoenzyme 1	22.4934	22.347	22.5319	23.0545	22.7443	22.3026	22.3955	22.9038	22.882	22.5441	22.2174	23.1034	22.8158	22.3949	22.298	23.2336		0.522149	0.562103	0.0895047	1.11789
F8W1A4;P54819;P54819-2	AK2	Isoform of P54819. Adenylate kinase 2. mitochondrial;Adenylate kinase 2. mitochondrial;Isoform of P54819. Isoform 2 of Adenylate kinase 2. mitochondrial	17.7252	17.4055	17.5606	17.3496	16.9282	17.5909	17.269	17.5162	17.7308	17.4491	17.6238	18.207	17.3473	17.3884	17.5488	17.6542		0.909479	0.33986	0.200534	1.75232
Q9UIJ7	AK3	GTP:AMP phosphotransferase AK3. mitochondrial	19.9919	19.5872	19.6546	18.7286	19.0792	20.2456	19.4891	19.7369	20.7006	19.8771	19.7309	19.7319	19.8061	20.4862	19.9769	20.0964	+	2.54806	0.0418667	0.486636	4.49032
Q9Y3D8;Q9Y3D8-2	AK6	Adenylate kinase isoenzyme 6;Isoform of Q9Y3D8. Isoform 2 of Adenylate kinase isoenzyme 6	11.0395	9.81924	17.3714	17.3048	19.2661	12.5388	8.23768	10.2499	10.7265	10.7257	10.9437	13.5806	11.341	13.6696	11.8307	11.6949		0.43818	0.61528	-1.41435	-0.96948
Q92667	AKAP1	A-kinase anchor protein 1. mitochondrial	15.4521	15.6312	15.4496	15.2017	15.5516	15.7962	15.2466	15.1809	16.066	16.0874	15.4658	15.924	15.7217	15.8525	15.487	15.5899		2.10966	0.0704944	0.335552	3.68884
Q02952;Q02952-2;Q02952-3	AKAP12	A-kinase anchor protein 12;Isoform of Q02952. Isoform 2 of A-kinase anchor protein 12;Isoform of Q02952. Isoform 3 of A-kinase anchor protein 12	14.3476	13.8842	15.4377	15.0798	15.1213	15.1026	14.5988	14.139	15.023	14.9683	14.3563	14.863	14.0438	16.0331	14.6578	14.7723		0.16074	0.850066	0.125847	0.414875
H0YMW2;Q12802;Q12802-2;Q12802-4	AKAP13	Isoform of Q12802. A-kinase anchor protein 13 (Fragment);A-kinase anchor protein 13;Isoform of Q12802. Isoform 2 of A-kinase anchor protein 13;Isoform of Q12802. Isoform 3 of A-kinase anchor protein 13	14.9734	15.2062	14.9269	15.2188	12.1285	14.946	15.0386	15.7071	15.0411	11.1445	15.8767	15.161	10.5065	15.4791	15.3349	15.7115		0.370889	0.66652	-0.48629	-0.845649
Q9Y2D5-4;Q9Y2D5-6	AKAP2	Isoform of Q9Y2D5. Isoform 3 of A-kinase anchor protein 2;Isoform of Q9Y2D5. Isoform 4 of A-kinase anchor protein 2	14.0411	13.6814	12.9621	13.5101	12.6921	14.6627	13.8483	13.6797	13.6327	12.6588	13.4485	13.2709	13.3587	13.7325	13.8366	13.522		0.429556	0.619597	-0.202112	-0.95388
F5GXD1;Q9P0M2	AKAP7	Isoform of Q9P0M2. A-kinase anchor protein 7 isoform gamma;A-kinase anchor protein 7 isoform gamma	10.9725	11.9153	12.7229	12.3615	9.90449	10.746	10.9471	12.9123	10.3286	12.3957	12.2003	12.1285	12.2353	11.6244	10.554	12.9883		0.297995	0.727073	0.246633	0.705136
O43823	AKAP8	A-kinase anchor protein 8	9.8604	10.7668	13.965	10.3155	11.5231	13.9328	10.1184	13.1323	9.79732	14.4859	11.0643	12.709	13.0564	10.9967	12.7836	13.114		0.256772	0.759085	0.549111	0.62202
P14550	AKR1A1	Alcohol dehydrogenase [NADP(+)]	19.4273	19.5471	20.1683	19.7413	20.1339	20.0039	19.8909	19.2705	19.8543	19.6539	19.2847	20.2288	19.8322	18.9876	19.2394	19.4827		0.434315	0.618039	-0.202446	-0.962497
P15121	AKR1B1	Aldose reductase	19.4824	19.7919	20.3037	20.1653	20.2457	20.1636	19.8472	19.6404	19.8617	19.8479	19.5757	20.3356	20.1838	19.3853	19.6608	19.7731		0.37544	0.662653	-0.127044	-0.854185
P52895	AKR1C2	Aldo-keto reductase family 1 member C2	15.1178	15.746	15.0524	15.4193	15.4251	14.1496	15.0365	13.0952	12.5916	15.0566	12.8042	13.2831	13.5607	14.7187	14.99	13.4269		1.33332	0.198553	-1.07625	-2.41521
A0A0A0MSS8;P42330	AKR1C3	Isoform of P42330. Aldo-keto reductase family 1 member C3;Aldo-keto reductase family 1 member C3	15.3206	15.7567	15.5274	15.8708	15.9316	14.7227	15.3873	15.403	15.1523	15.6885	14.8133	15.4941	15.7213	14.6571	15.1677	15.0971		2.04903	0.0725226	-0.266079	-3.58366
P51857;P51857-2	AKR1D1	3-oxo-5-beta-steroid 4-dehydrogenase;Isoform of P51857. Isoform 2 of 3-oxo-5-beta-steroid 4-dehydrogenase	10.5685	15.3328	14.7983	15.1539	15.0367	13.7908	14.4441	14.5912	14.5178	15.3816	14.238	14.7662	15.3796	14.3553	10.1237	15.4946		0.0291216	0.972918	0.0675744	0.0843448
H3BLU7;O43488	AKR7A2	Isoform of O43488. Aflatoxin B1 aldehyde reductase member 2 (Fragment);Aflatoxin B1 aldehyde reductase member 2	16.3122	16.926	16.5533	16.1592	15.9573	16.3506	15.5446	15.9738	16.308	16.2521	16.1408	16.015	16.032	16.9172	15.9984	15.8572		0.0799999	0.920345	-0.0320488	-0.220515
Q96B36;Q96B36-3	AKT1S1	Proline-rich AKT1 substrate 1;Isoform of Q96B36. Isoform 3 of Proline-rich AKT1 substrate 1	14.5301	14.48	14.9817	13.7197	14.5346	14.2512	14.2461	14.4541	14.2668	14.0382	13.7308	15.024	14.665	15.1475	14.5464	14.4148		0.105295	0.905344	0.0795035	0.283899
P13716	ALAD	Delta-aminolevulinic acid dehydratase	15.9068	16.0632	15.5808	14.2501	14.0556	15.5751	15.1153	15.31	15.2221	15.1616	15.7784	15.0078	15.1327	15.9848	15.3908	15.234		0.224544	0.792949	0.131909	0.554827
P02768	ALB	Serum albumin	24.6915	24.4688	24.4125	24.5266	24.6214	24.5106	24.1566	23.9656	24.7033	24.365	23.8519	24.6848	24.5947	25.1459	24.8824	24.6253		0.552816	0.546126	0.187441	1.17072
F5H4B6;Q8IZ83;Q8IZ83-3	ALDH16A1	Isoform of Q8IZ83. Aldehyde dehydrogenase family 16 member A1;Aldehyde dehydrogenase family 16 member A1;Isoform of Q8IZ83. Isoform 3 of Aldehyde dehydrogenase family 16 member A1	10.3416	10.484	11.3484	11.4564	10.9433	12.6691	9.3234	11.2632	11.8161	9.77836	10.2919	12.911	13.5667	11.3092	10.3452	12.1182		0.496599	0.578248	0.538436	1.07335
P00352	ALDH1A1	Retinal dehydrogenase 1	18.7423	18.6907	18.71	17.9936	18.4975	18.6798	18.2762	18.83	18.6212	18.432	18.043	17.747	18.3036	18.1816	17.7498	18.4823	+	2.97831	0.0265714	-0.35746	-5.3614
O94788	ALDH1A2	Retinal dehydrogenase 2	13.81	9.76544	9.82228	20.015	14.8357	18.2319	14.2577	14.773	18.2948	18.3487	20.8554	18.6726	18.3308	17.9932	17.0555	15.1402		1.31324	0.203294	3.64752	2.38375
P30837	ALDH1B1	Aldehyde dehydrogenase X. mitochondrial	16.2248	16.4395	16.9557	16.4342	16.3567	15.9219	16.2456	16.6065	15.8878	16.5928	16.6293	16.7485	16.3101	15.9627	16.9133	16.8647		0.326384	0.701958	0.0905327	0.760758
O75891;O75891-3	ALDH1L1	Cytosolic 10-formyltetrahydrofolate dehydrogenase;Isoform of O75891. Isoform 3 of Cytosolic 10-formyltetrahydrofolate dehydrogenase	15.9325	16.1975	15.4629	15.7628	16.0844	16.2283	15.9025	16.9936	16.481	16.855	15.9938	15.9341	16.5371	16.3984	15.8086	17.3123		2.22334	0.0607152	0.344483	3.88947
P05091	ALDH2	Aldehyde dehydrogenase. mitochondrial	17.5557	17.8498	18.4069	17.4055	17.4077	17.1384	17.4843	17.6976	17.3921	17.8167	17.6784	17.9238	17.5037	17.0296	18.0314	17.6502		0.0239547	0.978275	0.00999236	0.0697599
P51648;P51648-2	ALDH3A2	Fatty aldehyde dehydrogenase;Isoform of P51648. Isoform 2 of Fatty aldehyde dehydrogenase	16.8054	16.3549	17.0296	16.4832	16.9577	16.7076	16.656	16.0658	16.4823	16.7581	16.4791	16.5221	16.922	16.5828	16.87	16.7002		0.0862542	0.916064	0.0320394	0.236426
P30038	ALDH4A1	Delta-1-pyrroline-5-carboxylate dehydrogenase. mitochondrial	18.493	19.2021	19.6839	18.2083	18.6123	20.0262	18.815	19.3282	18.6829	19.2861	19.3057	18.5329	19.2694	19.2575	19.3128	19.5216		0.2494	0.768821	0.0999613	0.606831
P51649;P51649-2	ALDH5A1	Succinate-semialdehyde dehydrogenase. mitochondrial;Isoform of P51649. Isoform 2 of Succinate-semialdehyde dehydrogenase. mitochondrial	17.4329	17.7089	17.0893	16.4947	16.4263	17.4494	16.7038	17.2967	17.6089	17.973	17.0538	17.2251	16.8335	16.7685	16.7716	17.567		0.477889	0.591235	0.149923	1.04041
Q02252;Q02252-2	ALDH6A1	Methylmalonate-semialdehyde dehydrogenase [acylating]. mitochondrial;Isoform of Q02252. Isoform 2 of Methylmalonate-semialdehyde dehydrogenase [acylating]. mitochondrial	14.9325	16.2425	16.8735	15.1193	16.2553	16.617	15.7484	16.1895	15.1495	16.2337	16.048	15.8684	16.2259	15.8592	16.1212	16.1707		0.0719374	0.927901	-0.0376854	-0.199757
A0A1B0GTG2;A0A1B0GW77;P49419;P49419-2	ALDH7A1	Isoform of P49419. Alpha-aminoadipic semialdehyde dehydrogenase;Isoform of P49419. Alpha-aminoadipic semialdehyde dehydrogenase;Alpha-aminoadipic semialdehyde dehydrogenase;Isoform of P49419. Isoform 2 of Alpha-aminoadipic semialdehyde dehydrogenase	15.7485	15.5415	16.0003	15.1381	15.9052	16.1459	15.3322	15.4716	15.6557	15.4708	15.4445	15.5858	15.9066	14.9252	15.1142	15.5312		0.555278	0.544652	-0.20616	-1.17494
P49189	ALDH9A1	4-trimethylaminobutyraldehyde dehydrogenase	17.7663	18.2094	18.4543	17.2025	18.3725	18.1855	18.1063	17.5683	17.6631	17.6487	17.4213	17.3354	18.1566	17.7487	18.3726	17.8786		0.606531	0.513422	-0.204995	-1.26179
P04075;P04075-2	ALDOA	Fructose-bisphosphate aldolase A;Isoform of P04075. Isoform 2 of Fructose-bisphosphate aldolase A	24.0231	23.9391	24.2446	24.2968	24.2424	23.9548	23.9534	23.9491	24.243	24.0848	23.92	24.1261	24.0363	23.3746	23.7849	24.0746		0.601254	0.519726	-0.119851	-1.25292
P09972	ALDOC	Fructose-bisphosphate aldolase C	23.4174	23.5209	21.0585	22.2574	21.7257	22.337	21.8886	22.6012	22.7329	22.5975	21.9351	20.51	22.5202	22.8916	23.4332	22.3834		0.0216896	0.978633	0.024683	0.0633168
Q9BT30	ALKBH7	Alpha-ketoglutarate-dependent dioxygenase alkB homolog 7. mitochondrial	10.3514	12.2982	10.6453	9.50808	10.1348	10.9504	10.7446	10.5317	11.5002	10.677	11.0344	10.2327	11.2142	11.1948	11.6168	11.6694		0.768052	0.408502	0.496884	1.52704
Q96L96	ALPK3	Alpha-protein kinase 3	13.6446	12.9606	12.1354	12.6273	13.0718	13.2793	13.215	13.3004	13.4457	13.0361	12.4547	13.0448	13.0418	14.2343	13.8791	13.7944		1.39315	0.184163	0.337085	2.50921
E9PB61;Q86V81	ALYREF	Isoform of Q86V81. THO complex subunit 4;THO complex subunit 4	13.549	12.9786	14.0476	12.8163	13.3778	13.3914	12.7515	12.3745	12.9878	13.3548	12.8365	13.7924	13.7732	14.654	13.4391	13.3452		0.577319	0.532424	0.362056	1.21248
P02760	AMBP	Protein AMBP	14.8927	14.9752	14.5598	14.3924	14.535	15.1061	14.1613	15.7935	14.8256	13.9526	14.169	14.1961	14.206	14.8896	14.6484	14.5481		1.02637	0.286266	-0.372586	-1.93585
P23109;P23109-2	AMPD1	AMP deaminase 1;Isoform of P23109. Isoform 2 of AMP deaminase 1	18.3535	18.3885	17.1574	18.6624	18.6665	18.6394	18.8145	17.679	18.3549	18.4896	16.7685	18.2244	18.1916	17.6192	18.1865	17.1639		1.92978	0.0859742	-0.420346	-3.38023
C9JN86;P16157-22;P16157-23;Q6PK32	ANK1	Isoform of P16157. Ankyrin-1 (Fragment);Isoform of P16157. Isoform 22 of Ankyrin-1;Isoform of P16157. Isoform 23 of Ankyrin-1;Isoform of P16157. ANK1 protein	16.0647	15.7891	17.0854	16.6625	16.5148	16.699	16.5181	16.348	16.3266	15.982	16.7504	16.0162	15.7751	16.6244	16.0754	16.525		0.71266	0.445959	-0.200816	-1.43728
P16157-3	ANK1	Isoform of P16157. Isoform Er5 of Ankyrin-1	15.6168	15.331	15.6846	15.874	15.3312	15.3678	15.0656	14.733	15.0496	14.9513	15.4591	15.0563	15.1783	15.3873	15.4942	15.2611		0.395004	0.645249	-0.14584	-0.890603
I6L894	ANK2	Isoform of Q01484. Ankyrin-2	13.5999	13.4315	13.1745	12.914	13.371	13.7259	13.3136	13.3986	13.7414	13.5732	13.6539	13.6243	13.7119	13.9004	13.7586	13.8342	+	2.83996	0.0307742	0.358601	5.07095
Q12955;Q12955-4;Q12955-5	ANK3	Ankyrin-3;Isoform of Q12955. Isoform 2 of Ankyrin-3;Isoform of Q12955. Isoform 3 of Ankyrin-3	14.945	15.0603	14.9504	13.8933	15.1766	14.6814	14.9519	15.0678	14.7433	14.2639	14.764	14.1184	14.8162	14.6555	15.0977	14.7602		0.850276	0.366792	-0.188414	-1.65858
A0A0A0MRN9;Q9GZV1	ANKRD2	Isoform of Q9GZV1. Ankyrin repeat domain-containing protein 2;Ankyrin repeat domain-containing protein 2	18.4104	19.8269	20.1899	20.5483	20.6411	19.9063	20.2932	20.1333	18.3267	19.9775	19.1213	20.2756	19.94	19.6292	18.4478	18.5183		1.55149	0.148365	-0.714125	-2.76021
P39687	ANP32A	Acidic leucine-rich nuclear phosphoprotein 32 family member A	15.6447	14.4248	15.3162	14.6146	15.3219	15.5144	14.7436	15.3046	15.8787	15.1415	15.3405	15.2923	15.8859	17.2783	16.1202	15.2908		1.69748	0.120371	0.667903	2.99553
Q92688;Q92688-2	ANP32B	Acidic leucine-rich nuclear phosphoprotein 32 family member B;Isoform of Q92688. Isoform 2 of Acidic leucine-rich nuclear phosphoprotein 32 family member B	13.7519	13.2421	11.2147	11.5547	12.4224	13.3352	10.4726	12.7474	13.6391	10.1738	13.524	12.0042	12.2967	13.6848	14.0308	13.9393		0.360298	0.671753	0.568971	0.825684
Q9BTT0	ANP32E	Acidic leucine-rich nuclear phosphoprotein 32 family member E	14.6067	14.617	14.9269	14.9709	14.9253	14.857	14.2188	14.1406	14.5007	14.5518	14.0131	14.4335	14.4558	15.0279	14.2655	14.2441		0.843859	0.369351	-0.221365	-1.64838
P04083	ANXA1	Annexin A1	16.7263	15.9904	16.1002	16.4241	16.3679	16.1395	15.9485	15.986	16.2138	15.7478	16.1515	16.1824	16.121	16.7742	16.5766	16.0298		0.033212	0.965542	0.0142601	0.0957829
P50995;P50995-2	ANXA11	Annexin A11;Isoform of P50995. Isoform 2 of Annexin A11	16.3141	16.3557	15.9475	16.1058	16.0735	16.1818	16.1993	16.5761	16.4376	16.3526	16.6695	16.2994	16.096	16.2915	16.2973	16.3673		0.688918	0.460388	0.132149	1.39846
P07355;P07355-2	ANXA2	Annexin A2;Isoform of P07355. Isoform 2 of Annexin A2	18.3777	18.3435	18.484	18.3211	18.4032	17.876	17.921	17.4721	18.312	17.937	18.3093	18.0895	18.205	17.9917	18.2751	17.7684		0.157631	0.852695	-0.03882	-0.407784
P12429	ANXA3	Annexin A3	14.8276	15.2241	15.4684	15.0815	15.236	15.3603	14.8743	15.0633	14.6897	14.8775	14.7887	14.7472	14.6866	14.7878	14.5062	14.3158	+	3.46259	0.0204138	-0.466995	-6.46703
P09525;Q6P452	ANXA4	Annexin A4;Isoform of P09525. Annexin	13.9416	14.0067	13.6564	14.7828	14.3361	13.9713	14.0118	13.9361	14.318	14.0381	14.2975	14.0798	14.4109	14.2568	14.1027	13.6289		0.161713	0.850202	0.0612521	0.41709
P08758	ANXA5	Annexin A5	18.8125	18.9342	18.5155	18.7371	18.5546	18.9674	19.0477	18.6694	18.8754	18.7569	18.467	18.6503	18.8275	19.5385	19.132	18.6288		0.421572	0.627067	0.0797703	0.93937
E5RK69	ANXA6	Isoform of P08133. Annexin	13.7172	11.8708	14.4831	14.2464	14.4672	14.2786	14.3339	14.2469	14.0531	14.613	14.304	14.1235	14.5634	14.268	14.5182	14.1801		0.50229	0.574493	0.372413	1.08332
P08133	ANXA6	Annexin A6	18.1427	18.1793	18.1679	18.151	18.5554	18.6683	18.4006	18.0253	18.0178	18.106	18.4914	18.0532	18.5276	18.0904	18.4363	18.0358		0.322723	0.704231	-0.0664952	-0.753653
P20073;P20073-2	ANXA7	Annexin A7;Isoform of P20073. Isoform 2 of Annexin A7	16.9364	17.2205	17.3163	17.0733	17.5126	17.5029	17.2281	17.0334	16.7829	17.1064	16.8404	17.2904	17.2712	16.9811	16.8176	16.8705		1.54442	0.14954	-0.232884	-2.74893
Q16853	AOC3	Membrane primary amine oxidase	16.7956	16.8908	16.7422	16.6391	16.7224	16.6391	16.4561	16.1339	16.9342	16.2021	16.6093	16.4185	16.7001	16.6495	16.7227	16.1373		0.343178	0.688514	-0.0806701	-0.793103
E7ENJ6;K7EJL1;Q9BXS5;Q9BXS5-2	AP1M1	Isoform of Q9BXS5. AP-1 complex subunit mu-1;Isoform of Q9BXS5. AP-1 complex subunit mu-1;AP-1 complex subunit mu-1;Isoform of Q9BXS5. Isoform 2 of AP-1 complex subunit mu-1	23.764	23.3257	23.3525	23.4195	23.3494	23.7183	24.0109	24.1478	22.6887	23.7367	24.3741	23.574	23.6118	22.7745	23.334	24.1988		0.147718	0.86236	-0.0994146	-0.384989
O95782;O95782-2	AP2A1	AP-2 complex subunit alpha-1;Isoform of O95782. Isoform B of AP-2 complex subunit alpha-1	12.8034	16.0338	15.694	15.3794	15.0481	13.5985	14.0395	13.0536	15.3585	14.8885	12.8716	14.8921	15.0714	13.5079	15.2635	14.8846		0.0811243	0.918605	0.135997	0.223387
O94973;O94973-2	AP2A2	AP-2 complex subunit alpha-2;Isoform of O94973. Isoform 2 of AP-2 complex subunit alpha-2	12.1644	11.6356	11.3974	12.0968	12.535	12.1155	12.0748	12.5676	12.4972	12.1675	11.9463	8.71672	12.6159	12.0221	12.29	13.7422		0.0530347	0.94752	-0.0736642	-0.149935
P63010;P63010-2;P63010-3	AP2B1	AP-2 complex subunit beta;Isoform of P63010. Isoform 2 of AP-2 complex subunit beta;Isoform of P63010. Isoform 3 of AP-2 complex subunit beta	14.0005	13.4089	13.6118	13.4488	13.4518	13.6479	13.1846	13.5466	13.9138	13.6686	13.5555	13.7192	13.6565	13.6584	14.0535	13.539		0.851	0.366677	0.182968	1.65973
B1ALD2;Q9Y6B7;Q9Y6B7-2	AP4B1	Isoform of Q9Y6B7. AP-4 complex subunit beta-1 (Fragment);AP-4 complex subunit beta-1;Isoform of Q9Y6B7. Isoform 2 of AP-4 complex subunit beta-1	16.4805	16.1353	15.7901	11.0101	10.7607	16.308	15.8198	16.6976	16.2323	11.9549	17.1295	14.0173	16.1005	16.4937	16.761	16.739		0.361738	0.67101	0.803231	0.828407
Q9UPM8;Q9UPM8-2	AP4E1	AP-4 complex subunit epsilon-1;Isoform of Q9UPM8. Isoform 2 of AP-4 complex subunit epsilon-1	17.6233	10.4425	17.0893	17.46	17.6719	17.0933	17.3188	17.3017	17.6265	17.4122	17.1933	17.4938	17.4554	16.6241	17.826	17.8581		0.497891	0.578364	0.936082	1.07562
P02743	APCS	Serum amyloid P-component	14.4208	14.6299	13.8531	15.1427	14.7005	14.9445	14.3107	13.758	14.5803	14.492	13.7839	14.3813	14.5682	14.5612	14.3901	14.5439		0.138866	0.870395	-0.0574269	-0.364383
C9JIF9;P13798	APEH	Isoform of P13798. Acylamino-acid-releasing enzyme;Acylamino-acid-releasing enzyme	15.7881	15.9348	15.8406	15.7672	15.7889	15.8981	16.0178	15.9098	16.1611	15.7772	15.8422	15.9174	16.2377	15.4756	15.9741	16.3851		0.409041	0.636528	0.103123	0.916462
P27695	APEX1	DNA-(apurinic or apyrimidinic site) lyase	14.9701	15.0285	14.8131	14.1865	14.8043	15.2403	14.3659	14.9524	15.2956	14.6008	14.6693	14.5686	15.0898	14.6703	14.9307	14.9014		0.118652	0.892835	0.0456694	0.316384
G3V1C3;Q9BZZ5;Q9BZZ5-2;Q9BZZ5-3	API5	Isoform of Q9BZZ5. Apoptosis inhibitor 5;Apoptosis inhibitor 5;Isoform of Q9BZZ5. Isoform 2 of Apoptosis inhibitor 5;Isoform of Q9BZZ5. Isoform 3 of Apoptosis inhibitor 5	12.8627	10.7697	15.2145	13.4319	15.1718	11.6561	9.9811	10.4637	14.1355	14.3655	13.5638	13.7192	8.45246	11.172	12.0524	13.2944		0.0457008	0.95284	0.150469	0.130139
Q96GX9	APIP	Methylthioribulose-1-phosphate dehydratase	14.5704	14.3985	13.5179	13.482	13.8882	14.1017	13.4605	13.5962	14.1353	13.2859	12.8883	13.2946	13.3266	12.9591	13.8958	14.0741		0.947711	0.32103	-0.394484	-1.81254
Q9HDC9;Q9HDC9-2	APMAP	Adipocyte plasma membrane-associated protein;Isoform of Q9HDC9. Isoform 2 of Adipocyte plasma membrane-associated protein	13.4367	13.4188	14.1024	12.7537	14.0035	12.7918	13.0002	13.1236	13.5155	13.5037	12.5953	13.362	12.9469	13.0635	13.631	12.5269		0.279701	0.738625	-0.185767	-0.668614
P02647	APOA1	Apolipoprotein A-I	21.0722	21.5664	21.246	21.5722	21.6548	21.6247	20.5732	20.4339	20.9923	20.8085	20.6231	21.0577	21.341	22.5033	21.5141	20.8989		0.000807177	0.998928	-0.000576973	-0.00241157
P02652;V9GYG9;V9GYM3	APOA2	Apolipoprotein A-II;Isoform of P02652. Apolipoprotein A-II (Fragment);Isoform of P02652. Apolipoprotein A-II	19.6943	19.9612	19.284	19.7077	19.8758	19.6776	18.9728	18.8717	19.4136	19.302	18.7047	19.4145	20.0819	21.0058	20.3012	19.8997		0.382546	0.655816	0.259799	0.867465
P06727	APOA4	Apolipoprotein A-IV	16.9056	17.3388	17.2406	16.5952	17.4401	17.507	16.0721	16.4833	16.3752	16.2787	16.6653	16.4798	16.9299	18.5094	17.1353	17.213		0.000562029	0.998833	0.00048542	0.00167963
P04114	APOB	Apolipoprotein B-100	16.2265	16.0146	15.8468	15.5203	15.8188	15.7255	15.388	14.526	15.7401	14.6439	15.6198	14.9045	15.9128	15.7692	15.9657	15.2231		0.283596	0.735948	-0.160926	-0.676438
Q9Y235	APOBEC2	C->U-editing enzyme APOBEC-2	20.5821	21.4215	20.6171	20.7414	20.8749	20.6621	20.6793	20.6741	20.2253	20.4141	20.3298	20.4426	20.7761	20.5171	20.6298	20.6351		1.4233	0.175759	-0.285319	-2.55674
K7ERI9;P02654	APOC1	Isoform of P02654. Apolipoprotein C-I (Fragment);Apolipoprotein C-I	16.9432	16.1723	16.1076	15.7132	16.5267	16.2069	15.0094	14.9088	16.3698	14.3618	16.281	16.0558	16.6468	17.7158	16.7254	16.4798		0.39392	0.646011	0.381024	0.888596
B0YIW2;P02656	APOC3	Isoform of P02656. Apolipoprotein C-III;Apolipoprotein C-III	17.6163	18.4341	18.5903	19.3669	19.4873	18.062	17.4272	16.8428	17.0123	17.0556	16.5525	18.9323	17.5374	17.9121	18.0451	17.5577		0.899268	0.346536	-0.652747	-1.7362
A0A024R0T9;K7ER74;P02655;Q6P163	APOC4-APOC2;APOC4-APOC2;APOC2;APOC2	Isoform of K7ER74. Apolipoprotein C-II isoform 1;APOC4-APOC2 readthrough (NMD candidate);Apolipoprotein C-II;Isoform of P02655. APOC2 protein	15.0976	13.9924	10.36	14.623	13.3801	13.4444	12.6817	12.2543	14.3782	12.8682	13.6028	13.0588	13.4662	14.8613	14.0211	13.2164		0.350135	0.683835	0.454934	0.806389
C9JF17;P05090	APOD	Isoform of P05090. Apolipoprotein D (Fragment);Apolipoprotein D	16.5587	16.4901	16.5283	16.4143	15.9469	16.6771	15.7421	16.5296	16.6499	16.0331	15.4613	16.5345	15.7623	16.6923	16.3096	16.3734		0.341519	0.689612	-0.133835	-0.789926
P02649	APOE	Apolipoprotein E	15.7854	15.0408	15.2559	15.3829	15.3556	14.6466	15.1647	14.0728	15.3658	14.3764	14.7523	14.8857	15.4246	15.8461	15.0476	14.6093		0.0798564	0.920253	-0.049607	-0.220148
P02749	APOH	Beta-2-glycoprotein 1	16.348	16.2554	15.5883	16.1297	15.9213	16.3538	15.4498	15.5826	16.2364	15.7221	15.9824	16.3168	16.7653	16.5923	16.3056	16.4663		1.01192	0.29166	0.344792	1.91324
O14791;O14791-2;O14791-3	APOL1	Apolipoprotein L1;Isoform of O14791. Isoform 2 of Apolipoprotein L1;Isoform of O14791. Isoform 3 of Apolipoprotein L1	14.5774	13.9992	14.4857	14.9488	14.304	14.2079	14.09	13.7875	14.2381	13.4945	14.216	13.9821	13.8627	13.9314	14.7804	14.4959		0.372228	0.666386	-0.174928	-0.848164
J3KQL8	APOL2	Isoform of Q9BQE5. Apolipoprotein L2	12.805	12.9658	12.0873	11.9983	12.6205	12.5475	12.8005	11.7845	13.3564	12.4074	13.404	13.418	12.5455	14.1729	13.0622	13.4847		1.44101	0.171891	0.780178	2.58469
H7C1U8;Q9BUR5	APOO	Isoform of Q9BUR5. MICOS complex subunit (Fragment);MICOS complex subunit MIC26	17.6404	17.3517	17.6095	17.2242	17.5231	17.1036	17.2352	17.5855	17.856	17.6421	17.3617	17.1873	16.9748	17.0759	17.0614	17.573		0.307539	0.716347	-0.0676336	-0.723973
A0A087WUX8;A0A087WYF7;Q6UXV4	APOOL	Isoform of Q6UXV4. MICOS complex subunit;Isoform of Q6UXV4. MICOS complex subunit;MICOS complex subunit MIC27	16.901	16.4907	16.5864	16.1023	15.9611	16.9281	16.3942	17.0474	17.3876	17.0791	17.0219	16.4721	16.4844	16.5928	16.4995	17.0768		1.36272	0.19444	0.275371	2.46136
Q9UKG1	APPL1	DCC-interacting protein 13-alpha	14.6518	13.5896	14.0448	14.7338	14.422	14.4108	14.3116	14.6881	14.877	14.1979	14.2289	13.9657	14.7326	15.2775	14.637	14.7303		0.646248	0.487409	0.224306	1.32809
H3BQZ9;P07741	APRT	Isoform of P07741. Adenine phosphoribosyltransferase;Adenine phosphoribosyltransferase	17.013	16.9978	17.1502	16.9872	16.996	16.2182	16.6341	16.6421	16.8481	16.618	16.6356	17.3474	17.06	16.4218	16.929	16.7742		0.00172669	0.997519	-0.000582695	-0.00515335
P55087;P55087-2;V9PBN7	AQP4	Aquaporin-4;Isoform of P55087. Isoform 1 of Aquaporin-4;Isoform of P55087. Aquaporin 4 isoform delta4	15.2086	14.601	15.3868	14.9158	10.4433	15.336	9.10065	14.4882	14.3803	15.0135	9.39815	15.0471	10.4005	14.2944	14.0471	15.156		0.0745489	0.925408	-0.217918	-0.206512
B0YIW6;P48444	ARCN1	Isoform of P48444. Archain 1. isoform CRA_a;Coatomer subunit delta	12.8951	11.8775	12.7564	12.0362	13.0118	12.5617	12.8981	12.2612	12.9892	13.3321	13.0784	12.525	12.9056	13.3934	13.1187	13.011		1.63111	0.132788	0.506939	2.88801
P84077	ARF1	ADP-ribosylation factor 1	17.4251	17.185	17.3516	17.4846	17.3338	16.7541	16.6076	16.4618	17.2496	17.1896	17.0539	17.2603	16.9502	16.7958	16.51	17.2183		0.143101	0.86686	-0.0469916	-0.374273
C9JPM4;P18085	ARF4	Isoform of P18085. ADP-ribosylation factor 4 (Fragment);ADP-ribosylation factor 4	13.1724	13.6008	10.6449	11.7274	11.1497	12.7087	12.497	12.7781	12.9498	11.6215	13.0658	12.0235	13.0998	13.381	13.5352	12.9965		0.537928	0.556609	0.549247	1.14516
P84085	ARF5	ADP-ribosylation factor 5	10.7752	13.5641	14.1406	13.811	14.1079	14.107	13.2331	13.699	14.2402	14.2293	14.2448	13.7481	14.0962	14.5506	14.6474	14.3375		1.07822	0.265434	0.832005	2.01685
Q07960	ARHGAP1	Rho GTPase-activating protein 1	12.9927	12.011	16.7002	13.4333	13.1641	12.9492	12.8957	15.7651	15.8206	14.8556	13.5205	14.6723	15.1308	15.1071	13.2606	14.4952		0.540812	0.555775	0.86891	1.15012
P52565	ARHGDIA	Rho GDP-dissociation inhibitor 1	18.1791	18.0516	17.9668	17.2991	17.6303	18.255	17.4277	17.4788	17.7496	17.1767	17.3332	17.4023	17.3626	18.2298	17.4799	16.8234		1.47763	0.166163	-0.341362	-2.64266
P52566	ARHGDIB	Rho GDP-dissociation inhibitor 2	14.4553	14.2905	14.671	14.0891	14.756	14.5864	14.197	13.8619	14.8082	14.5733	14.2099	14.6629	14.9468	14.689	14.4621	14.4727		1.08994	0.264622	0.239708	2.03513
Q5VXI4;Q9HCE6;Q9HCE6-2;Q9HCE6-3;Q9HCE6-4	ARHGEF10L	Isoform of Q9HCE6. Rho guanine nucleotide exchange factor 10-like protein;Rho guanine nucleotide exchange factor 10-like protein;Isoform of Q9HCE6. Isoform 2 of Rho guanine nucleotide exchange factor 10-like protein;Isoform of Q9HCE6. Isoform 3 of Rho guanine nucleotide exchange factor 10-like protein;Isoform of Q9HCE6. Isoform 4 of Rho guanine nucleotide exchange factor 10-like protein	11.37	10.9967	10.9681	10.7724	10.8837	11.2142	10.5305	10.9206	11.3277	11.3457	11.179	11.0363	11.2998	11.0312	10.0983	11.7244		0.613463	0.507267	0.173281	1.27342
B1ALK7;Q14155-1;Q14155-5	ARHGEF7	Isoform of Q14155. Rho guanine nucleotide exchange factor 7;Isoform of Q14155. Isoform 1 of Rho guanine nucleotide exchange factor 7;Isoform of Q14155. Isoform 5 of Rho guanine nucleotide exchange factor 7	11.5662	11.0369	9.6395	12.1683	9.91125	10.9608	12.6922	12.965	12.6205	13.3702	11.9892	12.0487	10.1654	10.4028	12.8699	11.1777		0.414671	0.633855	0.463024	0.926774
O95376	ARIH2	E3 ubiquitin-protein ligase ARIH2	13.2564	12.7919	13.029	12.9334	14.4408	14.4389	12.566	13.3616	13.2891	13.1335	12.7513	13.2441	13.1864	12.3732	13.0619	10.7319		0.741831	0.42594	-0.630841	-1.48469
P36404	ARL2	ADP-ribosylation factor-like protein 2	14.8297	15.1786	15.2588	15.1439	15.5612	15.2814	14.8833	9.70381	15.2907	10.8479	15.6939	15.6915	10.0169	14.9032	15.119	15.162		0.123464	0.887789	-0.389436	-0.327935
H3BU49;Q9Y2Y0;Q9Y2Y0-2	ARL2BP	Isoform of Q9Y2Y0. ADP-ribosylation factor-like protein 2-binding protein;ADP-ribosylation factor-like protein 2-binding protein;Isoform of Q9Y2Y0. Isoform 2 of ADP-ribosylation factor-like protein 2-binding protein	11.1723	11.8935	11.0034	11.2672	11.7388	10.2975	12.7119	9.5395	13.3991	10.509	10.0481	13.1483	11.4625	14.0266	13.6471	13.5199		0.911307	0.339	1.26706	1.75521
P36405	ARL3	ADP-ribosylation factor-like protein 3	14.0644	13.894	11.1217	10.2671	12.4247	11.4973	10.1628	14.5621	13.7892	13.5823	13.6707	11.4799	12.2714	13.7252	14.2764	13.3109		0.794103	0.395427	1.01397	1.56892
A0A0C4DG62;F5GYV5;F5H7X4;F8WCT1;H7BZV4;Q66PJ3;Q66PJ3-2;Q66PJ3-3;Q66PJ3-4;Q66PJ3-7	ARL6IP4	Isoform of Q66PJ3. ADP-ribosylation factor-like protein 6-interacting protein 4;Isoform of Q66PJ3. ADP-ribosylation factor-like protein 6-interacting protein 4 (Fragment);Isoform of Q66PJ3. ADP-ribosylation factor-like protein 6-interacting protein 4 (Fragment);Isoform of Q66PJ3. ADP-ribosylation factor-like protein 6-interacting protein 4;Isoform of Q66PJ3. ADP-ribosylation factor-like protein 6…	12.702	10.9357	12.3838	9.44184	9.30704	11.1707	9.21016	11.6189	10.7054	12.3806	11.7112	10.036	12.2267	12.556	11.5858	11.5362		0.627617	0.495523	0.745964	1.29709
O75915	ARL6IP5	PRA1 family protein 3	17.6641	17.5362	17.7881	17.4294	17.2521	17.1531	17.2879	17.277	17.3171	17.5493	17.0152	17.3416	17.3431	17.1867	17.3644	17.7748		0.186966	0.827262	-0.0619531	-0.473629
Q96BM9	ARL8A	ADP-ribosylation factor-like protein 8A	15.8563	16.0231	15.8688	15.8307	15.8636	15.7458	15.5906	15.3388	15.735	15.4642	16.0695	15.5427	15.6948	15.3637	15.446	15.5412		0.868662	0.357823	-0.157564	-1.68777
Q9H993	ARMT1	Protein-glutamate O-methyltransferase	14.894	14.9174	15.1958	14.5625	15.2605	14.832	14.7265	14.9285	15.1318	14.9854	14.8094	14.9711	15.0668	14.933	14.998	14.9205		0.286544	0.733459	0.0623683	0.682341
O15144	ARPC2	Actin-related protein 2/3 complex subunit 2	13.1687	12.184	13.5252	13.4273	13.2699	12.9922	12.3743	12.7793	13.8499	13.3351	13.0809	13.3094	13.83	13.1813	13.5358	13.633		1.34894	0.19609	0.504338	2.43972
O15145	ARPC3	Actin-related protein 2/3 complex subunit 3	14.3862	13.9859	9.83374	13.653	13.997	14.3355	13.8678	13.7037	14.593	14.1546	14.2679	14.5541	14.4479	14.3858	14.5587	14.3063		0.965519	0.313972	0.938167	1.84051
A0A0A6YYG9;F8WCF6;F8WDD7;P59998;P59998-2;P59998-3	ARPC4-TTLL3;ARPC4-TTLL3;ARPC4;ARPC4;ARPC4;ARPC4	Protein ARPC4-TTLL3;Isoform of A0A0A6YYG9. Actin-related protein 2/3 complex subunit 4;Isoform of P59998. Actin-related protein 2/3 complex subunit 4;Actin-related protein 2/3 complex subunit 4;Isoform of P59998. Isoform 2 of Actin-related protein 2/3 complex subunit 4;Isoform of P59998. Isoform 3 of Actin-related protein 2/3 complex subunit 4	15.308	15.4643	15.0831	11.5509	15.6336	13.7406	10.7357	13.7798	14.8903	15.285	14.4926	14.4515	15.2275	14.4687	15.3329	14.4687		0.678626	0.468599	0.915164	1.38156
O15511	ARPC5	Actin-related protein 2/3 complex subunit 5	13.3564	2.37517	12.2073	12.532	13.5887	11.7199	13.1112	12.7303	13.3735	13.3206	12.3254	12.5084	12.5643	13.8145	13.4797	14.1581		0.618638	0.502218	1.74043	1.28209
Q9BPX5	ARPC5L	Actin-related protein 2/3 complex subunit 5-like protein	14.6908	13.936	14.2586	12.2217	14.2882	14.0633	14.0903	15.1797	15.1155	14.5927	15.4494	14.4742	18.5116	15.0131	14.6045	14.7142		1.32265	0.20106	1.21832	2.39849
H3BMD8;P56211	ARPP19	Isoform of P56211. cAMP-regulated phosphoprotein 19;cAMP-regulated phosphoprotein 19	17.8233	18.0305	17.6881	17.6022	17.5845	18.0734	17.494	17.3271	17.6333	17.2348	16.7977	17.2779	17.6659	18.6178	17.5748	16.7392		0.752557	0.416099	-0.260227	-1.50204
Q13508	ART3	Ecto-ADP-ribosyltransferase 3	15.5297	15.6199	15.9051	14.6745	15.7546	16.0234	15.0265	15.3926	14.7531	14.9554	14.4332	14.158	14.9024	15.4064	15.0732	15.0424	+	2.40723	0.0491071	-0.650254	-4.22437
A0A1B0GTM3;A0A1B0GTZ5;A0A1B0GUA4;A0A1B0GUH5;A0A1B0GW68;E7EMM4;Q13510;Q13510-2	ASAH1	Isoform of Q13510. Acid ceramidase;Isoform of Q13510. Acid ceramidase;Isoform of Q13510. Acid ceramidase;Isoform of Q13510. Acid ceramidase;Isoform of Q13510. Acid ceramidase;Isoform of Q13510. Acid ceramidase;Acid ceramidase;Isoform of Q13510. Isoform 2 of Acid ceramidase	14.7813	14.9243	15.0835	14.5921	15.0211	14.717	14.3937	14.7796	15.0829	14.4376	15.0877	14.7991	14.9099	15.2356	14.761	14.4202		0.170652	0.842109	0.0551827	0.437298
Q8WXI3;Q8WXI3-2;Q8WXI3-3	ASB10	Ankyrin repeat and SOCS box protein 10;Isoform of Q8WXI3. Isoform 2 of Ankyrin repeat and SOCS box protein 10;Isoform of Q8WXI3. Isoform 3 of Ankyrin repeat and SOCS box protein 10	18.4251	18.8562	17.6298	18.217	17.613	18.3348	17.87	18.2072	18.1967	17.6611	18.0991	17.8661	17.7872	11.9261	18.4534	18.5777		0.454928	0.606938	-0.823207	-0.999572
A0A087WXS7;O43681	ASNA1	Isoform of O43681. ATPase ASNA1;ATPase ASNA1	15.4374	15.6547	16.4772	16.035	17.2914	16.7282	15.2211	15.1962	16.3563	17.1503	15.302	16.47	15.819	16.4636	15.6872	15.7851		0.129729	0.880419	0.124046	0.342855
P45381	ASPA	Aspartoacylase	14.0649	14.142	13.6069	13.7381	13.6109	14.16	13.9907	13.2307	14.4181	14.3102	13.7544	14.0456	13.8375	13.9214	14.2871	14.2989		1.23471	0.223429	0.291121	2.26096
Q12797	ASPH	Aspartyl/asparaginyl beta-hydroxylase	12.541	12.1911	14.2202	12.9036	14.3439	12.8031	13.9125	12.5003	13.8907	14.1342	12.6004	14.2444	14.4952	13.2323	12.9174	14.0672		0.540214	0.555869	0.520762	1.14909
Q12797-3;Q12797-4	ASPH	Isoform of Q12797. Isoform 3 of Aspartyl/asparaginyl beta-hydroxylase;Isoform of Q12797. Isoform 4 of Aspartyl/asparaginyl beta-hydroxylase	18.6227	18.5926	18.8521	19.1939	19.1241	18.937	18.7351	18.6126	18.8479	19.0254	18.4894	19.1241	19.2014	19.2621	18.7883	19.0806		0.725896	0.436313	0.143639	1.45883
Q9BXN1	ASPN	Asporin	15.8104	15.218	14.6767	14.1779	15.2282	15.2956	14.5807	13.9734	14.8221	14.902	14.546	14.3724	14.0889	15.0465	14.686	13.55		1.18398	0.234154	-0.368364	-2.1818
Q9BZE9;Q9BZE9-2;Q9BZE9-3	ASPSCR1	Tether containing UBX domain for GLUT4;Isoform of Q9BZE9. Isoform 2 of Tether containing UBX domain for GLUT4;Isoform of Q9BZE9. Isoform 3 of Tether containing UBX domain for GLUT4	9.51247	11.2402	9.73026	14.1289	10.3934	10.9299	13.0921	10.8106	13.7216	13.4413	10.9839	13.7784	11.5388	14.4304	10.7918	10.6474		0.796929	0.394688	1.18696	1.57345
P00966	ASS1	Argininosuccinate synthase	12.0712	12.6096	10.2584	9.5709	12.8161	14.5339	13.0464	12.7993	10.1566	14.149	15.7	14.0841	13.1177	12.9557	14.3907	14.591		0.786373	0.400112	1.42987	1.55651
Q8NBU5	ATAD1	ATPase family AAA domain-containing protein 1	13.8366	13.6315	12.4231	12.8328	13.128	13.5701	13.4833	13.9502	14.5575	14.0557	14.1907	13.8818	14.0607	13.8159	13.9861	14.477	+	2.56612	0.039236	0.771232	4.52506
Q9ULI0;Q9ULI0-2	ATAD2B	ATPase family AAA domain-containing protein 2B;Isoform of Q9ULI0. Isoform 2 of ATPase family AAA domain-containing protein 2B	11.9418	16.5317	12.5398	12.6579	12.9748	12.7735	10.5798	10.6671	13.301	13.5402	10.9283	13.462	13.1858	11.125	13.1345	13.455		0.0903937	0.914576	0.183179	0.246868
H0Y2W2;Q9NVI7;Q9NVI7-2;Q9NVI7-3	ATAD3A	Isoform of Q9NVI7. ATPase family AAA domain-containing protein 3A (Fragment);ATPase family AAA domain-containing protein 3A;Isoform of Q9NVI7. Isoform 2 of ATPase family AAA domain-containing protein 3A;Isoform of Q9NVI7. Isoform 3 of ATPase family AAA domain-containing protein 3A	14.6054	14.3306	12.4677	13.1178	11.333	13.883	12.9675	13.8497	14.1719	13.8858	13.7208	13.6599	13.934	12.5463	14.0258	13.906		0.42654	0.623196	0.411974	0.948405
B4E107;F5GXE4;O95260-2	ATE1	Isoform of O95260. Arginyl-tRNA--protein transferase 1;Isoform of O95260. Arginyl-tRNA--protein transferase 1;Isoform of O95260. Isoform ATE1-2 of Arginyl-tRNA--protein transferase 1	13.4554	13.3463	13.8477	13.5741	13.7623	14.2354	14.3027	13.7228	13.7243	13.7062	13.6165	14.2313	13.9711	13.6199	13.8476	13.877		0.104544	0.904989	0.0433942	0.282053
A0A0A0MRJ2;P18847;P18847-2;P18847-3;P18847-4;P18847-5;Q5VTZ4	ATF3	Isoform of P18847. Cyclic AMP-dependent transcription factor ATF-3 (Fragment);Cyclic AMP-dependent transcription factor ATF-3;Isoform of P18847. Isoform 2 of Cyclic AMP-dependent transcription factor ATF-3;Isoform of P18847. Isoform 3 of Cyclic AMP-dependent transcription factor ATF-3;Isoform of P18847. Isoform 4 of Cyclic AMP-dependent transcription factor ATF-3;Isoform of P18847. Isoform 5 of C…	15.4156	16.1199	15.5465	15.841	16.1669	15.9677	15.9576	15.7182	14.6268	16.1596	15.2088	16.3117	16.6076	17.0457	16.0302	16.6955		0.507036	0.572271	0.244071	1.09161
Q9NT62	ATG3	Ubiquitin-like-conjugating enzyme ATG3	14.257	13.8842	14.26	14.5269	14.2553	14.3416	13.9903	13.9439	14.8178	14.2636	14.3894	13.7696	14.5574	14.7114	14.3965	14.7536		0.866717	0.35895	0.275015	1.68468
A0A0A0MT61;G5E979;H7BYM2;Q8WYN0;Q8WYN0-3;Q8WYN0-5	ATG4A	Isoform of Q8WYN0. Cysteine protease (Fragment);Isoform of Q8WYN0. Cysteine protease;Isoform of Q8WYN0. Cysteine protease (Fragment);Cysteine protease ATG4A;Isoform of Q8WYN0. Isoform 3 of Cysteine protease ATG4A;Isoform of Q8WYN0. Isoform 4 of Cysteine protease ATG4A	10.7807	12.5191	11.0089	10.0704	10.271	10.549	10.2748	10.7119	8.82197	10.1246	11.5675	9.84179	10.6952	10.1088	11.3599	10.0746		0.482084	0.589872	-0.448934	-1.04782
C9JIK8;Q9Y4P1;Q9Y4P1-2;Q9Y4P1-6	ATG4B	Isoform of Q9Y4P1. Cysteine protease (Fragment);Cysteine protease ATG4B;Isoform of Q9Y4P1. Isoform 2 of Cysteine protease ATG4B;Isoform of Q9Y4P1. Isoform 6 of Cysteine protease ATG4B	10.795	11.7379	11.736	10.6665	8.24266	11.2227	13.8521	10.9134	13.4564	14.0547	13.5057	13.2091	10.8529	12.2033	9.74436	10.2903		0.584291	0.528858	1.01882	1.2243
P31939	ATIC	Bifunctional purine biosynthesis protein PURH	16.7099	17.2955	17.529	16.9694	17.1686	16.8244	16.8337	16.5218	16.934	16.928	16.6706	16.6056	16.8918	16.2415	16.2387	16.5002		1.66546	0.126495	-0.355266	-2.94353
Q8NHH9;Q8NHH9-3;Q8NHH9-5	ATL2	Atlastin-2;Isoform of Q8NHH9. Isoform 3 of Atlastin-2;Isoform of Q8NHH9. Isoform 5 of Atlastin-2	14.9384	14.4912	15.257	15.2969	15.3693	14.9774	14.7794	15.052	14.651	15.0764	14.6268	14.8033	12.2424	13.4434	14.7864	14.9497		0.88346	0.351827	-0.697777	-1.71121
F5H6I7;Q6DD88	ATL3	Isoform of Q6DD88. Atlastin-3;Atlastin-3	10.4443	12.0142	13.3875	11.5263	9.1724	18.1554	18.2167	18.554	12.5564	13.23	12.1912	10.8676	10.9583	10.0894	17.7041	17.8456		0.277059	0.742074	-0.753543	-0.663293
E5RIM7;O00244	ATOX1	Isoform of O00244. Copper transport protein ATOX1;Copper transport protein ATOX1	16.3188	16.4334	16.2251	16.3655	16.4681	16.4641	16.1562	15.9625	16.5522	16.0796	15.847	16.1861	16.3457	16.8334	16.1375	15.8158		0.347908	0.685618	-0.0745462	-0.802144
P05023;P05023-3;P05023-4	ATP1A1	Sodium/potassium-transporting ATPase subunit alpha-1;Isoform of P05023. Isoform 3 of Sodium/potassium-transporting ATPase subunit alpha-1;Isoform of P05023. Isoform 4 of Sodium/potassium-transporting ATPase subunit alpha-1	15.9632	15.4298	15.8183	15.5541	15.1953	15.8787	15.0328	14.0348	15.5549	15.1284	15.5399	15.0602	15.974	15.6168	15.3576	15.8727		0.210444	0.80681	0.149705	0.524742
B1AKY9;P50993	ATP1A2	Isoform of P50993. Sodium/potassium-transporting ATPase subunit alpha;Sodium/potassium-transporting ATPase subunit alpha-2	18.4761	18.3484	18.5278	18.1821	18.6315	18.5514	18.3493	18.3108	18.4717	18.6565	18.1381	17.8643	18.5219	18.091	18.2799	18.5593		0.451659	0.607655	-0.0993192	-0.993719
Q13733	ATP1A4	Sodium/potassium-transporting ATPase subunit alpha-4	15.0943	17.4452	16.2918	16.9196	16.8688	16.7875	16.9973	16.5366	17.0069	16.6135	17.5906	17.1983	17.4293	17.1398	16.9814	16.9856		0.888189	0.348412	0.500549	1.71869
P05026;P05026-2	ATP1B1	Sodium/potassium-transporting ATPase subunit beta-1;Isoform of P05026. Isoform 2 of Sodium/potassium-transporting ATPase subunit beta-1	18.0597	17.4713	17.9596	17.2117	17.7736	17.7748	17.1851	17.0601	17.3331	17.5969	16.867	18.1179	17.6837	17.0672	17.269	17.4542		0.241385	0.776429	-0.13834	-0.5902
B7ZKW0;Q9UN42;Q9UN42-2	ATP1B4	Isoform of Q9UN42. Sodium/potassium-transporting ATPase subunit beta;Protein ATP1B4;Isoform of Q9UN42. Isoform B of Protein ATP1B4	11.2145	11.6306	12.2776	11.9208	12.0377	15.4527	12.4462	12.5951	10.8315	12.6648	8.01476	12.6655	9.87098	14.8485	12.8485	15.2877		0.164365	0.849157	-0.317864	-0.423107
O14983;O14983-2	ATP2A1	Sarcoplasmic/endoplasmic reticulum calcium ATPase 1;Isoform of O14983. Isoform SERCA1A of Sarcoplasmic/endoplasmic reticulum calcium ATPase 1	21.1889	20.7932	20.9292	21.3171	21.7198	20.8514	21.1773	21.4845	21.2895	21.3594	21.0728	21.0238	21.4947	20.3564	20.9685	21.6076		0.11414	0.897037	-0.036083	-0.305482
P16615-2	ATP2A2	Isoform of P16615. Isoform 2 of Sarcoplasmic/endoplasmic reticulum calcium ATPase 2	21.5321	21.1542	21.2795	21.4707	21.8124	21.396	21.7657	21.7976	21.6612	21.6138	21.5569	21.5259	21.6214	21.0374	21.6557	21.9691		0.235721	0.781085	0.0541544	0.578369
Q93084;Q93084-2;Q93084-3;Q93084-4;Q93084-5;Q93084-6;Q93084-7	ATP2A3	Sarcoplasmic/endoplasmic reticulum calcium ATPase 3;Isoform of Q93084. Isoform SERCA3A of Sarcoplasmic/endoplasmic reticulum calcium ATPase 3;Isoform of Q93084. Isoform SERCA3C of Sarcoplasmic/endoplasmic reticulum calcium ATPase 3;Isoform of Q93084. Isoform SERCA3G of Sarcoplasmic/endoplasmic reticulum calcium ATPase 3;Isoform of Q93084. Isoform SERCA3E of Sarcoplasmic/endoplasmic reticulum calc…	10.4165	14.5928	14.5994	13.8829	14.684	14.3025	13.346	13.9492	11.4611	13.4474	11.2702	13.462	13.9606	14.9055	11.6187	13.5917		0.792625	0.396513	-0.75703	-1.56655
P20020;P20020-2;P20020-3;P20020-4;P20020-5;P20020-6	ATP2B1	Plasma membrane calcium-transporting ATPase 1;Isoform of P20020. Isoform A of Plasma membrane calcium-transporting ATPase 1;Isoform of P20020. Isoform B of Plasma membrane calcium-transporting ATPase 1;Isoform of P20020. Isoform C of Plasma membrane calcium-transporting ATPase 1;Isoform of P20020. Isoform E of Plasma membrane calcium-transporting ATPase 1;Isoform of P20020. Isoform K of Plasma me…	14.3252	14.5863	14.7803	15.1953	15.2256	15.1016	15.0044	14.9412	15.0915	14.9237	14.8377	14.5865	15.1438	14.7228	14.0767	14.9783		0.211672	0.806917	-0.0998514	-0.52738
P23634;P23634-6;P23634-7;P23634-8	ATP2B4	Plasma membrane calcium-transporting ATPase 4;Isoform of P23634. Isoform XB of Plasma membrane calcium-transporting ATPase 4;Isoform of P23634. Isoform ZB of Plasma membrane calcium-transporting ATPase 4;Isoform of P23634. Isoform ZD of Plasma membrane calcium-transporting ATPase 4	13.2578	13.9903	13.8516	13.1647	13.4091	13.399	13.2064	12.9557	13.4941	13.0786	12.8392	13.5997	13.3922	11.6187	13.2227	13.0157		0.666885	0.476382	-0.37171	-1.36222
P25705	ATP5A1	ATP synthase subunit alpha. mitochondrial	22.7796	22.6929	22.527	22.0363	21.9528	22.784	22.2137	22.8873	23.2211	22.8178	22.8108	22.7075	22.3962	22.421	22.9937	23.093		1.43468	0.173631	0.323433	2.5747
P06576	ATP5B	ATP synthase subunit beta. mitochondrial	23.3462	23.2844	23.123	22.6536	22.6149	23.3041	22.887	23.4465	23.6374	23.2336	23.3312	23.15	22.9762	22.9694	23.2506	23.4208		0.857309	0.36351	0.163699	1.66975
P36542;P36542-2	ATP5C1	ATP synthase subunit gamma. mitochondrial;Isoform of P36542. Isoform Heart of ATP synthase subunit gamma. mitochondrial	18.664	18.5777	17.8364	17.852	17.1685	17.9359	18.0786	18.8131	19.1609	18.7747	18.8795	18.5402	18.0194	17.9594	18.5645	18.4798		1.51421	0.15599	0.431521	2.70077
P30049	ATP5D	ATP synthase subunit delta. mitochondrial	20.4821	20.4467	20.7188	20.2662	20.0673	20.7449	20.2755	20.6023	21.094	21.0326	20.4718	21.1823	20.7149	21.0398	20.721	21.1244		2.24075	0.0572533	0.472109	3.92062
P24539	ATP5F1	ATP synthase F(0) complex subunit B1. mitochondrial	18.3592	18.0444	18.1963	17.7593	17.4927	17.9946	17.8253	18.4418	18.8374	18.4902	18.4578	18.6315	17.8976	17.5156	18.1577	18.6214		1.27131	0.214773	0.311957	2.31813
O75947	ATP5H	ATP synthase subunit d. mitochondrial	21.1862	21.3476	21.4857	20.964	20.5548	20.9132	21.0372	21.058	21.6098	21.5424	21.2471	21.5527	21.2154	21.7309	21.255	21.2601		1.71426	0.120877	0.358356	3.02287
P56385	ATP5I	ATP synthase subunit e. mitochondrial	19.1486	19.1651	18.9945	18.8238	18.1737	18.9895	19.0408	19.1041	19.4993	19.3514	19.8999	19.2213	18.8881	19.3738	19.3553	19.4719	+	3.01124	0.0253333	0.452601	5.43207
P18859;P18859-2	ATP5J	ATP synthase-coupling factor 6. mitochondrial;Isoform of P18859. Isoform 2 of ATP synthase-coupling factor 6. mitochondrial	20.3868	20.593	20.3975	19.8021	19.5895	20.5296	19.792	20.2009	20.7726	20.1975	20.0477	20.28	20.0355	21.2558	20.3054	20.5942		0.989878	0.301081	0.274669	1.87872
P56134;P56134-3	ATP5J2	ATP synthase subunit f. mitochondrial;Isoform of P56134. Isoform 3 of ATP synthase subunit f. mitochondrial	18.9856	18.7345	18.788	18.8008	18.6495	18.5892	18.6552	19.0702	19.3861	19.4111	19.3245	18.9163	18.3641	18.1344	18.6387	18.8485		0.267791	0.749551	0.0938246	0.64453
E9PN17;O75964	ATP5L	Isoform of O75964. ATP synthase subunit g. mitochondrial;ATP synthase subunit g. mitochondrial	18.1635	17.9797	19.0448	17.2238	19.0321	18.0528	17.8054	18.3029	18.7479	18.48	18.5188	19.4002	17.8526	17.6843	18.263	18.7304		0.312253	0.711805	0.259008	0.733225
P48047	ATP5O	ATP synthase subunit O. mitochondrial	19.0645	18.7219	19.5049	18.5803	18.6237	18.7311	18.778	19.3491	19.66	19.688	19.5474	19.6445	18.6543	18.793	19.1628	19.353		1.41886	0.177224	0.393691	2.54973
Q99766	ATP5S	ATP synthase subunit s. mitochondrial	15.5921	15.4759	15.2364	15.565	14.6499	15.3628	15.1019	15.485	15.468	15.0071	15.6565	15.2049	15.6071	15.2289	15.7283	15.122		0.141231	0.866953	0.0692279	0.369912
P38606;P38606-2	ATP6V1A	V-type proton ATPase catalytic subunit A;Isoform of P38606. Isoform 2 of V-type proton ATPase catalytic subunit A	13.4716	12.933	13.404	12.4207	13.2718	13.0249	13.133	12.8562	13.3332	12.9804	12.9863	12.6179	12.9997	13.2095	13.4303	13.2499		0.137026	0.871801	0.0365076	0.36007
P21281	ATP6V1B2	V-type proton ATPase subunit B. brain isoform	14.1969	13.9943	14.0243	13.5174	13.6744	13.4852	13.812	13.4178	14.0595	14.0501	13.7983	13.9502	14.1213	13.6585	13.8621	14.1027		0.857511	0.363692	0.185077	1.67008
P36543	ATP6V1E1	V-type proton ATPase subunit E 1	15.8293	14.8776	15.0537	14.6912	14.7088	15.6008	14.9075	14.8032	15.1188	15.4132	15.8996	13.18	15.5292	15.1943	15.6376	13.457		0.14249	0.866768	-0.130292	-0.37285
Q16864;Q16864-2	ATP6V1F	V-type proton ATPase subunit F;Isoform of Q16864. Isoform 2 of V-type proton ATPase subunit F	14.5717	14.799	12.7514	10.3974	10.4337	15.265	15.3989	13.8324	15.2081	15.5014	14.8401	14.9218	15.4908	14.9675	14.2794	15.3674		1.14604	0.245568	1.64086	2.12264
O75348	ATP6V1G1	V-type proton ATPase subunit G 1	15.9983	15.4462	14.6486	14.4991	14.5999	15.2614	13.8237	15.396	15.4368	14.362	14.6774	15.0068	14.2929	15.6649	14.9897	14.0604		0.197055	0.816881	-0.147768	-0.495756
I3L448;Q5TC12;Q5TC12-3	ATPAF1	Isoform of Q5TC12. ATP synthase mitochondrial F1 complex assembly factor 1;ATP synthase mitochondrial F1 complex assembly factor 1;Isoform of Q5TC12. Isoform 3 of ATP synthase mitochondrial F1 complex assembly factor 1	14.3737	13.8907	15.1375	9.24098	10.1489	14.3025	11.2636	13.8695	14.9705	14.8871	14.4951	15.0334	14.6999	14.0559	14.1689	14.9245		1.25521	0.218749	1.876	2.29297
Q8N5M1	ATPAF2	ATP synthase mitochondrial F1 complex assembly factor 2	14.6979	15.5218	15.7089	14.4215	15.072	13.8734	15.2901	15.4715	16.0126	15.7157	15.3176	15.4472	15.0672	14.7326	14.2314	15.2428		0.322177	0.704999	0.21374	0.752591
Q9UII2	ATPIF1	ATPase inhibitor. mitochondrial	18.2777	17.8509	18.8633	18.916	18.9133	18.0544	17.883	17.1946	19.3574	18.9244	17.4843	19.116	19.3697	17.9415	17.4485	17.4987		0.20759	0.80972	0.148406	0.5186
Q9UBB4;Q9UBB4-2	ATXN10	Ataxin-10;Isoform of Q9UBB4. Isoform 2 of Ataxin-10	13.0627	11.4499	11.1353	13.7377	11.5289	13.0518	11.7353	12.4304	12.9315	11.9291	11.8823	11.655	11.7914	12.7243	13.5385	11.2067		0.0492257	0.952932	-0.0591463	-0.139687
F8VQP2;F8VRK6;F8WB06;H0YH87;Q99700;Q99700-2;Q99700-4;Q99700-5;V9GY86	ATXN2	Isoform of Q99700. Ataxin-2;Isoform of Q99700. Ataxin-2 (Fragment);Isoform of Q99700. Ataxin-2;Isoform of Q99700. Ataxin-2 (Fragment);Ataxin-2;Isoform of Q99700. Isoform 2 of Ataxin-2;Isoform of Q99700. Isoform 4 of Ataxin-2;Isoform of Q99700. Isoform 5 of Ataxin-2;Isoform of Q99700. Ataxin-2	12.1139	10.5116	11.1616	12.4061	15.0434	14.5104	14.4079	15.5203	14.1951	9.04919	10.5003	10.0166	10.4177	15.1146	14.3647	10.4982		0.840357	0.369298	-1.43984	-1.6428
H3BUF6;Q8WWM7;Q8WWM7-2;Q8WWM7-3;Q8WWM7-4;Q8WWM7-5;Q8WWM7-6;Q8WWM7-8;Q8WWM7-9	ATXN2L	Isoform of Q8WWM7. Ataxin-2-like protein;Ataxin-2-like protein;Isoform of Q8WWM7. Isoform 2 of Ataxin-2-like protein;Isoform of Q8WWM7. Isoform 3 of Ataxin-2-like protein;Isoform of Q8WWM7. Isoform 4 of Ataxin-2-like protein;Isoform of Q8WWM7. Isoform 5 of Ataxin-2-like protein;Isoform of Q8WWM7. Isoform 6 of Ataxin-2-like protein;Isoform of Q8WWM7. Isoform 8 of Ataxin-2-like protein;Isoform of Q…	9.88031	11.6593	11.6305	10.5484	15.2737	11.9173	10.5997	10.2295	15.5152	9.47569	9.38563	12.0158	12.0407	12.4773	11.9135	11.9896		0.144371	0.865903	0.384305	0.377226
Q13825	AUH	Methylglutaconyl-CoA hydratase. mitochondrial	14.7242	14.5196	13.1255	12.8779	12.7489	14.5189	13.8742	14.4913	14.5754	14.2101	14.1872	13.7757	13.2537	13.7047	14.3446	14.3651		0.368962	0.667656	0.191986	0.842026
Q9NQS1	AVEN	Cell death regulator Aven	12.1292	12.4979	10.0226	12.6376	13.6164	14.0642	13.6414	13.7225	14.1188	13.6474	10.6349	13.1	13.5612	14.1619	13.0719	13.5193		0.750287	0.418194	0.435449	1.49837
P25311	AZGP1	Zinc-alpha-2-glycoprotein	16.4236	16.4975	16.6961	16.1803	15.7589	16.7802	15.731	15.8777	16.2022	15.9024	15.5222	16.2306	16.3279	17.3335	15.8384	16.0817		0.113345	0.898507	-0.0632957	-0.303554
P61769	B2M	Beta-2-microglobulin	15.1699	14.2779	15.8719	15.3892	15.9988	15.2112	15.1914	15.4093	15.5473	15.4198	15.1666	15.1185	15.7521	15.5343	14.9259	15.3896		0.0755425	0.924374	0.0418086	0.209074
J3KQS6;Q9NWV8	BABAM1	Isoform of Q9NWV8. BRISC and BRCA1-A complex member 1;BRISC and BRCA1-A complex member 1	14.6828	14.6563	15.435	14.7486	14.0898	14.8426	14.6386	13.7674	14.6708	14.6088	14.1985	14.0679	14.582	14.0729	14.3371	13.9701		0.727348	0.43504	-0.294133	-1.46119
J3QTA2;Q99933;Q99933-3;Q99933-4	BAG1	Isoform of Q99933. BAG family molecular chaperone regulator 1;BAG family molecular chaperone regulator 1;Isoform of Q99933. Isoform 3 of BAG family molecular chaperone regulator 1;Isoform of Q99933. Isoform 4 of BAG family molecular chaperone regulator 1	13.7337	13.7799	13.563	13.0575	13.3379	15.6151	13.3175	12.5994	13.0774	15.2881	12.6274	13.3626	12.9438	15.6371	12.9201	13.9571		0.118434	0.892531	0.101206	0.31586
O95816	BAG2	BAG family molecular chaperone regulator 2	15.2103	15.6372	15.2326	15.9619	15.1185	14.9401	14.5736	14.8341	14.8953	14.5375	14.3889	14.7844	14.7945	15.1155	15.3672	15.4074		0.484515	0.587466	-0.277163	-1.05211
C9JFK9	BAG3	Isoform of O95817. BAG family molecular chaperone regulator 3 (Fragment)	12.0394	10.9211	13.2499	12.5346	12.9932	12.8136	12.6725	12.3822	11.1802	12.7494	11.1272	14.2113	13.0419	13.5307	12.5104	12.9008		0.17483	0.837655	0.205657	0.446669
O95817	BAG3	BAG family molecular chaperone regulator 3	19.0333	19.5279	19.7102	19.3485	19.6471	19.3815	19.034	18.8236	18.9119	19.4336	18.5063	19.455	19.5596	20.08	19.0167	19.0032		0.136618	0.872003	-0.0674551	-0.359113
Q16611;Q16611-2	BAK1	Bcl-2 homologous antagonist/killer;Isoform of Q16611. Isoform 2 of Bcl-2 homologous antagonist/killer	12.2947	10.1073	10.8584	9.00762	10.7025	11.4353	12.184	13.1733	13.1848	15.7536	13.0068	11.8898	15.6754	13.0125	11.2483	13.808		1.6018	0.137966	2.22701	2.84083
O75531	BANF1	Barrier-to-autointegration factor	19.9126	19.5941	19.4524	19.4149	19.6271	19.6686	19.3968	19.5897	19.4781	19.3722	19.4506	19.4279	19.812	20.0098	19.7117	19.7436		0.182751	0.828293	0.0437133	0.464309
P80723	BASP1	Brain acid soluble protein 1	13.2337	12.7836	12.3489	13.2008	10.2695	11.9224	12.712	12.656	13.9214	13.2021	12.2568	13.4459	12.7742	15.5745	13.0454	13.0944		1.18804	0.23205	1.02347	2.18814
A0A024RCR6;A0A0G2JK23;P46379;P46379-2;P46379-3	BAT3;BAG6;BAG6;BAG6;BAG6	Isoform of P46379. BAG6;Isoform of P46379. Large proline-rich protein BAG6;Large proline-rich protein BAG6;Isoform of P46379. Isoform 2 of Large proline-rich protein BAG6;Isoform of P46379. Isoform 3 of Large proline-rich protein BAG6	12.6745	13.6853	14.2117	13.7602	13.9724	13.332	13.2398	12.7569	13.1339	13.7932	13.2445	13.365	13.873	13.7627	13.7087	13.6677		0.220787	0.797024	0.114478	0.546852
Q07812;Q07812-2;Q07812-5;Q07812-7;Q07812-8	BAX	Apoptosis regulator BAX;Isoform of Q07812. Isoform Beta of Apoptosis regulator BAX;Isoform of Q07812. Isoform Epsilon of Apoptosis regulator BAX;Isoform of Q07812. Isoform Psi of Apoptosis regulator BAX;Isoform of Q07812. Isoform Sigma of Apoptosis regulator BAX	13.144	13.5558	11.2197	10.6846	13.9793	13.3546	13.7824	13.3933	13.4316	15.6921	10.073	13.3044	10.3501	14.0809	13.7793	10.6611		0.104091	0.904454	-0.217641	-0.280938
Q9UIG0;Q9UIG0-2	BAZ1B	Tyrosine-protein kinase BAZ1B;Isoform of Q9UIG0. Isoform 2 of Tyrosine-protein kinase BAZ1B	16.6949	16.7666	15.7701	16.8337	16.0077	16.3891	15.3729	15.4906	15.6197	15.1204	16.0313	16.1079	16.1274	16.7077	17.6535	16.2689		0.0312742	0.968682	0.0388947	0.0903758
P50895	BCAM	Basal cell adhesion molecule	15.8278	15.3072	16.0745	15.5504	15.9846	15.7232	15.8436	15.1084	16.0604	15.8738	15.1268	15.9339	15.6111	15.6682	15.805	15.2175		0.0317122	0.968328	-0.0153586	-0.0916
Q9UHQ4	BCAP29	B-cell receptor-associated protein 29	13.7705	10.8738	10.5571	12.0185	11.168	12.6213	12.9721	13.5737	13.5686	12.7256	13.84	10.0434	13.1074	13.1377	13.1824	13.1986		0.528471	0.558383	0.656098	1.12884
P51572;P51572-2	BCAP31	B-cell receptor-associated protein 31;Isoform of P51572. Isoform 2 of B-cell receptor-associated protein 31	13.9204	14.6553	13.9922	12.7185	14.6538	13.9472	13.8967	13.6706	14.4242	14.0268	14.226	14.3161	14.3356	14.8265	14.5785	14.5034		0.997817	0.300877	0.472804	1.89116
M0QXF9;M0QZ10;O15382	BCAT2	Isoform of O15382. Branched-chain-amino-acid aminotransferase (Fragment);Isoform of O15382. Branched-chain-amino-acid aminotransferase;Branched-chain-amino-acid aminotransferase. mitochondrial	14.6184	15.4883	14.8686	13.9729	13.8551	14.2389	13.978	14.4838	14.3961	14.5608	14.6152	14.4269	14.3308	13.8477	14.3524	14.5166		0.124667	0.886005	-0.0572033	-0.33081
P21953	BCKDHB	2-oxoisovalerate dehydrogenase subunit beta. mitochondrial	11.1243	11.7815	13.4937	12.9682	13.5284	14.4401	14.8299	12.9751	13.8465	14.2414	13.7924	13.3586	8.6449	13.9241	12.8796	12.8391		0.0856792	0.91614	-0.201822	-0.23497
H3BS02;H3BTL2;O14874;O14874-2;O14874-3	BCKDK	Isoform of O14874. [3-methyl-2-oxobutanoate dehydrogenase [lipoamide]] kinase. mitochondrial;Isoform of O14874. [3-methyl-2-oxobutanoate dehydrogenase [lipoamide]] kinase. mitochondrial (Fragment);[3-methyl-2-oxobutanoate dehydrogenase [lipoamide]] kinase. mitochondrial;Isoform of O14874. Isoform 2 of [3-methyl-2-oxobutanoate dehydrogenase [lipoamide]] kinase. mitochondrial;Isoform of O14874. Iso…	13.6881	13.3548	13.2416	12.5801	12.7846	12.2398	11.7724	13.517	14.6819	14.2017	14.0632	13.7727	14.0328	13.6597	14.455	14.219	+	3.06248	0.0228235	1.23846	5.54329
Q9BXK5	BCL2L13	Bcl-2-like protein 13	17.6796	17.6535	17.5784	17.568	17.7247	17.8399	17.1977	17.4688	17.7562	17.8818	17.2679	17.7583	17.898	18.0259	17.2875	17.4747		0.628981	0.493968	0.0799735	1.29937
A0A1W2PQ43;E9PK09;E9PK91;E9PKI6;E9PQN2;Q9NYF8;Q9NYF8-2;Q9NYF8-3	BCLAF1	Isoform of Q9NYF8. Bcl-2-associated transcription factor 1;Isoform of Q9NYF8. Bcl-2-associated transcription factor 1 (Fragment);Isoform of Q9NYF8. Bcl-2-associated transcription factor 1;Isoform of Q9NYF8. Bcl-2-associated transcription factor 1;Isoform of Q9NYF8. Bcl-2-associated transcription factor 1;Bcl-2-associated transcription factor 1;Isoform of Q9NYF8. Isoform 2 of Bcl-2-associated tran…	15.2686	15.0891	12.7042	10.725	15.7683	15.1926	14.5494	14.8464	15.0847	14.1781	13.6612	15.438	15.2217	15.5066	15.3507	10.6639		0.0486326	0.952248	0.120166	0.138085
H0YCN8;Q9BYV7;Q9BYV7-2;Q9BYV7-4;Q9BYV7-5;Q9BYV7-6	BCO2	Isoform of Q9BYV7. Beta.beta-carotene 9'.10'-oxygenase (Fragment);Beta.beta-carotene 9'.10'-oxygenase;Isoform of Q9BYV7. Isoform 2 of Beta.beta-carotene 9'.10'-oxygenase;Isoform of Q9BYV7. Isoform 4 of Beta.beta-carotene 9'.10'-oxygenase;Isoform of Q9BYV7. Isoform 5 of Beta.beta-carotene 9'.10'-oxygenase;Isoform of Q9BYV7. Isoform 6 of Beta.beta-carotene 9'.10'-oxygenase	10.7559	12.1646	10.3645	10.4151	10.9128	14.021	13.9081	10.9213	13.2603	10.776	13.3921	12.4777	10.3513	11.5958	13.2539	13.2002		0.357494	0.674961	0.605492	0.820374
Q9Y276	BCS1L	Mitochondrial chaperone BCS1	13.8891	11.8416	13.4674	14.3516	10.4184	10.5217	11.2834	13.5818	13.4658	12.786	14.4096	13.5323	12.2769	13.1357	12.6472	12.8874		0.82999	0.37607	0.723221	1.62629
Q02338	BDH1	D-beta-hydroxybutyrate dehydrogenase. mitochondrial	14.8333	15.6223	15.1682	13.5326	14.0435	15.2401	14.9303	15.4735	15.2768	15.72	15.2731	14.9813	14.2088	14.6379	15.203	15.2835		0.479191	0.590327	0.217558	1.04271
Q9BUT1;Q9BUT1-2	BDH2	3-hydroxybutyrate dehydrogenase type 2;Isoform of Q9BUT1. Isoform 2 of 3-hydroxybutyrate dehydrogenase type 2	11.3657	11.6946	12.2048	11.9991	12.299	12.4965	11.2693	9.51834	13.0398	12.5994	9.2738	13.7412	12.7696	10.9015	11.0352	13.3296		0.269616	0.748138	0.480334	0.648238
P21810	BGN	Biglycan	14.8999	14.3362	14.2935	14.3964	14.3678	13.7646	14.194	13.2178	15.236	14.4746	14.1717	15.2092	14.4052	16.5742	15.4346	14.6227		1.33037	0.199265	0.83223	2.41059
P55957;P55957-2	BID	BH3-interacting domain death agonist;Isoform of P55957. Isoform 2 of BH3-interacting domain death agonist	11.3834	12.0423	11.3088	12.2325	11.4019	12.8434	10.4118	11.3695	12.6015	11.4897	11.622	11.1973	12.0948	12.9933	12.4543	12.0926		0.626583	0.49641	0.44399	1.29537
O00499;O00499-11;O00499-2;O00499-6	BIN1	Myc box-dependent-interacting protein 1;Isoform of O00499. Isoform BIN1+12A of Myc box-dependent-interacting protein 1;Isoform of O00499. Isoform IIB of Myc box-dependent-interacting protein 1;Isoform of O00499. Isoform II2 of Myc box-dependent-interacting protein 1	19.3747	19.5126	19.725	19.5297	19.9513	19.8342	19.112	19.5206	19.5096	19.6203	18.9811	19.6223	19.8273	20.3509	19.4389	19.6091		0.145324	0.864365	0.0499096	0.37944
Q9NR09	BIRC6	Baculoviral IAP repeat-containing protein 6	14.9192	13.308	15.1713	13.4638	14.1318	15.6437	13.0267	13.0354	13.6345	13.8913	12.7739	15.5381	13.9949	15.8594	12.822	13.1382		0.10478	0.905182	-0.130952	-0.282633
A0A1W2PS85;P28715;P28715-2;R4GMW8	BIVM-ERCC5;ERCC5;ERCC5;BIVM-ERCC5	Isoform of R4GMW8. BIVM-ERCC5 readthrough;DNA repair protein complementing XP-G cells;Isoform of P28715. Isoform 2 of DNA repair protein complementing XP-G cells;BIVM-ERCC5 readthrough	15.7608	15.3982	15.2781	15.5614	15.1194	14.7098	14.118	14.1819	13.7426	13.5951	14.2868	14.3871	14.7142	14.8629	15.233	14.8152		0.690152	0.460257	-0.561346	-1.40048
Q13867	BLMH	Bleomycin hydrolase	15.348	15.3753	15.0686	14.8637	15.0081	15.5119	15.1032	14.8715	15.0651	14.525	14.4831	14.8536	14.3152	14.9503	14.7705	14.819		2.25676	0.0556438	-0.421072	-3.94936
Q6QNY1	BLOC1S2	Biogenesis of lysosome-related organelles complex 1 subunit 2	10.8407	12.3744	10.8825	10.6701	12.1491	11.3938	11.1576	11.2801	12.2433	11.7662	11.799	12.4528	13.2281	13.337	11.8318	12.2569		2.09063	0.0712527	1.02086	3.65569
P53004	BLVRA	Biliverdin reductase A	15.3089	15.5713	15.3143	15.6182	15.1896	15.4225	15.1687	15.2463	15.6224	15.5149	15.3437	15.6793	15.4985	14.8393	15.4365	15.4271		0.25779	0.757908	0.0652475	0.624109
P30043	BLVRB	Flavin reductase (NADPH)	19.0602	19.4171	19.3802	19.5361	19.0244	19.2788	19.1046	18.7346	19.2028	19.1536	19.4717	19.3305	19.4452	18.8805	19.0163	18.9429		0.0417345	0.957383	-0.0115659	-0.119318
Q12983	BNIP3	BCL2/adenovirus E1B 19 kDa protein-interacting protein 3	12.9673	18.5042	14.055	14.3612	12.385	13.594	12.9874	14.8139	12.5361	13.2402	14.6172	14.2859	13.5922	14.048	13.8118	13.5251		0.286731	0.73353	-0.501438	-0.682716
Q9Y3E2	BOLA1	BolA-like protein 1	13.4907	10.4698	10.3571	9.71635	14.7283	11.4534	9.7051	13.9714	14.3471	14.459	10.9802	13.799	14.6645	14.7746	13.1028	11.3364		1.06881	0.268837	1.69642	2.00216
A0A087WZT3;Q9H3K6	BOLA2	Isoform of Q9H3K6. BolA-like protein 2;BolA-like protein 2	15.139	14.3216	14.0816	13.6324	14.0662	14.3353	14.6612	14.2345	14.471	13.8373	14.1267	14.3377	13.894	14.2612	14.3821	14.3496		0.288735	0.733442	-0.101528	-0.68672
Q53S33	BOLA3	BolA-like protein 3	11.2945	12.7682	11.2699	15.246	10.0731	10.4444	11.2056	9.93026	14.942	15.8332	14.691	14.8534	14.4048	14.6504	11.2566	14.2572	+	2.38925	0.0474667	2.83206	4.19103
G3V1P3;Q969J3	BORCS5	Isoform of Q969J3. BLOC-1-related complex subunit 5;BLOC-1-related complex subunit 5	14.6965	9.68259	10.0447	14.1537	14.4232	9.41891	11.4623	11.5516	11.7305	14.084	11.2409	14.2324	10.9204	10.8704	11.8291	13.6619		0.165794	0.847805	0.391998	0.426343
Q96GS4	BORCS6	BLOC-1-related complex subunit 6	10.7544	11.0436	10.6121	13.4217	12.7622	12.135	12.2551	11.8635	12.4737	11.7619	12.0477	10.8614	12.4471	12.9396	10.947	11.9176		0.0473622	0.952687	0.0685415	0.134647
P07738	BPGM	Bisphosphoglycerate mutase	15.9502	15.9953	15.9534	16.0735	15.8966	15.9818	15.651	15.1833	15.3912	15.1311	15.3763	16.1143	15.6873	16.0286	15.7073	15.0266		1.23045	0.22285	-0.277778	-2.25431
O95861	BPNT1	3'(2').5'-bisphosphate nucleotidase 1	14.3565	14.1607	13.4457	13.8745	13.8866	14.2131	13.9457	13.6776	13.8119	13.8573	13.4344	13.8169	14.3971	13.8517	13.1175	14.0278		0.447156	0.612084	-0.155718	-0.98564
P46736;P46736-2;P46736-3	BRCC3	Lys-63-specific deubiquitinase BRCC36;Isoform of P46736. Isoform 1 of Lys-63-specific deubiquitinase BRCC36;Isoform of P46736. Isoform 3 of Lys-63-specific deubiquitinase BRCC36	11.6552	10.7083	11.6047	12.3959	11.4606	11.0642	11.3456	11.3974	11.7489	11.929	10.7975	10.9895	9.90866	10.8582	11.4176	11.4418		0.448776	0.610875	-0.317575	-0.988549
Q5VW32	BROX	BRO1 domain-containing protein BROX	12.7229	14.4632	14.2374	14.3838	14.6321	14.712	14.2925	12.7887	13.0292	14.1289	14.5068	13.9479	14.6293	14.3777	14.7693	14.393		0.360309	0.672099	0.193676	0.825705
Q9NW68;Q9NW68-2;Q9NW68-5	BSDC1	BSD domain-containing protein 1;Isoform of Q9NW68. Isoform 2 of BSD domain-containing protein 1;Isoform of Q9NW68. Isoform 5 of BSD domain-containing protein 1	10.5904	11.1624	11.5882	9.98553	11.7019	10.4325	11.3583	10.8103	10.3435	11.3522	10.3163	16.76	16.8816	11.3982	11.5636	11.5343		0.788715	0.399295	1.56503	1.56027
P35613;P35613-2	BSG	Basigin;Isoform of P35613. Isoform 2 of Basigin	17.5701	17.8631	17.7296	17.3508	17.5039	17.7884	17.7796	17.776	18.1594	18.207	17.6944	17.861	17.9363	17.7962	17.7374	18.1058		1.67826	0.122588	0.267008	2.9643
Q10589;Q10589-2	BST2	Bone marrow stromal antigen 2;Isoform of Q10589. Isoform 2 of Bone marrow stromal antigen 2	15.1045	15.483	15.0191	14.4679	14.7611	14.6376	14.3418	15.1996	14.9729	14.4653	14.8287	14.6743	14.762	15.7899	15.1093	14.9933		0.116553	0.894949	0.0726433	0.311323
P20290	BTF3	Transcription factor BTF3	13.0728	14.0916	14.001	13.4293	13.8256	13.936	13.5493	13.6792	14.2366	13.6974	13.7268	14.4953	14.2931	14.7575	14.5424	14.2587		1.46403	0.166904	0.552857	2.62111
Q96K17	BTF3L4	Transcription factor BTF3 homolog 4	15.527	14.9636	15.74	14.8444	14.5856	14.9275	14.2537	14.7244	15.5659	14.5495	14.7982	15.1098	14.7196	15.6311	14.6218	14.6855		0.0278203	0.973918	0.0143797	0.0806861
J3QSX4;J3QT28;O43684;O43684-2	BUB3	Isoform of O43684. Mitotic checkpoint protein BUB3;Isoform of O43684. Mitotic checkpoint protein BUB3 (Fragment);Mitotic checkpoint protein BUB3;Isoform of O43684. Isoform 2 of Mitotic checkpoint protein BUB3	13.6249	14.102	13.0602	11.0051	10.3672	13.7338	13.4377	11.0037	13.9604	12.562	13.7385	12.7149	13.3212	13.7845	14.1289	12.4056		0.869233	0.357413	0.785174	1.68867
E7ETZ4;Q9Y6E2	BZW2	Isoform of Q9Y6E2. Basic leucine zipper and W2 domain-containing protein 2 (Fragment);Basic leucine zipper and W2 domain-containing protein 2	22.0786	22.8182	23.0712	22.2787	22.5649	22.9344	22.863	22.0555	23.2376	22.2639	22.7457	22.8419	23.7454	23.8393	23.0076	23.5061		1.16682	0.238358	0.565358	2.15504
Q711Q0	C10orf71	Uncharacterized protein C10orf71	13.991	14.4516	14.3603	13.951	14.3741	14.6001	13.9663	13.9207	14.1817	14.1142	13.8669	14.031	14.0492	15.1262	13.9901	13.653		0.25916	0.756481	-0.0753562	-0.626917
A0A087WT99;Q9H0W9;Q9H0W9-2	C11orf54	Isoform of Q9H0W9. Ester hydrolase C11orf54;Ester hydrolase C11orf54;Isoform of Q9H0W9. Isoform 2 of Ester hydrolase C11orf54	17.0783	17.4957	17.3949	16.8498	17.2345	17.6329	17.2288	17.0136	16.8057	17.2206	16.9801	16.7454	17.1074	17.4444	17.0146	16.8328	+	3.41967	0.0210323	-0.222189	-6.36298
Q9H3H3;Q9H3H3-2;Q9H3H3-3	C11orf68	UPF0696 protein C11orf68;Isoform of Q9H3H3. Isoform 2 of UPF0696 protein C11orf68;Isoform of Q9H3H3. Isoform 3 of UPF0696 protein C11orf68	14.7701	12.1136	15.2131	14.9781	15.0718	15.3329	14.9913	14.708	15.2608	14.9169	14.3216	15.2282	14.9811	14.629	14.6629	14.4262		0.145395	0.864488	0.155963	0.379606
F8VQQ3;Q9HB07	C12orf10	Isoform of Q9HB07. UPF0160 protein MYG1. mitochondrial;UPF0160 protein MYG1. mitochondrial	12.0597	11.4189	9.90481	14.1563	11.7482	11.383	10.9346	10.4569	12.6408	14.0743	11.6923	10.1079	11.4838	13.5637	13.8289	9.84094		0.343019	0.688554	0.646282	0.792799
Q99622	C12orf57	Protein C10	13.5812	14.0945	14.8822	13.4094	15.1752	14.6769	13.9484	14.1063	14.6499	13.9644	14.205	14.0121	14.3122	14.7113	14.075	14.3077		0.073727	0.926147	0.0454302	0.204389
Q69YU5	C12orf73	Uncharacterized protein C12orf73	10.1262	11.282	11.0764	10.1774	10.8528	10.2264	11.6829	10.1378	13.7668	11.1073	13.6952	10.656	12.2982	12.4902	12.221	13.6831		2.00294	0.0772264	1.79448	3.50451
A0A0A6YYH1;Q7Z6K5;Q7Z6K5-2	C15orf38-AP3S2;ARPIN;ARPIN	Protein C15orf38-AP3S2;Arpin;Isoform of Q7Z6K5. Isoform C15orf38-AP3S2 of Arpin	11.8046	11.4362	8.79384	14.4301	14.4049	10.2282	9.22862	10.1411	11.515	14.6664	15.0083	14.3519	14.1713	11.082	14.5549	10.6102		1.11908	0.255389	1.93656	2.0806
H3BQZ5;Q8WUR7	C15orf40	Isoform of Q8WUR7. UPF0235 protein C15orf40;UPF0235 protein C15orf40	8.96115	11.3026	13.0676	13.1617	12.5646	10.7792	12.8123	12.5017	12.7472	10.4731	9.51684	13.373	12.9205	13.6743	10.1269	13.2237		0.0448596	0.953211	0.113087	0.127851
Q6ZUT6;Q6ZUT6-4	C15orf52	Uncharacterized protein C15orf52;Isoform of Q6ZUT6. Isoform 4 of Uncharacterized protein C15orf52	12.9317	12.7587	13.0561	13.3663	12.8703	13.0801	13.0794	12.8157	13.6696	12.7994	12.5971	12.9897	13.0932	13.7543	13.8008	13.0805		0.665929	0.476	0.228301	1.36065
F8WFD6;Q6ZW13;R4GNF0	C16orf86	Isoform of Q6ZW13. Uncharacterized protein C16orf86;Uncharacterized protein C16orf86;Isoform of Q6ZW13. Uncharacterized protein C16orf86 (Fragment)	16.9031	16.8499	17.6578	17.3147	17.4082	17.5853	17.0599	16.6511	17.0933	17.1799	16.5289	17.2657	17.2263	17.1474	16.832	17.0824		0.326713	0.702831	-0.134234	-0.761395
A6NNT2	C16orf96	Uncharacterized protein C16orf96	16.5535	11.7571	13.0735	11.9108	11.3623	15.1171	17.0366	17.013	15.7471	15.4064	18.009	15.4838	15.0087	15.6834	17.1256	16.585		1.30836	0.204175	1.90314	2.3761
Q96B23-2	C18orf25	Isoform of Q96B23. Isoform 2 of Uncharacterized protein C18orf25	11.9998	11.5434	10.2726	11.1895	11.263	11.7798	11.7802	11.9489	12.3674	11.5619	11.5167	10.5508	12.3422	12.3655	12.005	11.9802		0.871875	0.356793	0.364077	1.69286
K7EPS8;Q9NSK7;Q9NSK7-3;Q9NSK7-4	C19orf12	Isoform of Q9NSK7. Protein C19orf12 (Fragment);Protein C19orf12;Isoform of Q9NSK7. Isoform 3 of Protein C19orf12;Isoform of Q9NSK7. Isoform 1 of Protein C19orf12	11.4338	10.3212	11.9437	9.9224	10.5319	11.8119	11.0578	11.0487	13.9753	13.9198	13.1111	10.4324	14.3741	11.4655	12.011	13.6253		1.98835	0.0773516	1.85537	3.47959
A0A140TA86;Q5XKP0	C19orf70;MIC13	Isoform of Q5XKP0. MICOS complex subunit MIC13;MICOS complex subunit MIC13	15.7262	13.3374	15.4352	10.8191	14.895	9.60568	10.1804	14.1798	14.9598	15.4877	15.4161	14.9862	15.1215	11.4971	13.565	15.3393		1.40273	0.182777	1.52425	2.5243
Q6ZSJ8;Q6ZSJ8-2	C1orf122	Uncharacterized protein C1orf122;Isoform of Q6ZSJ8. Isoform 2 of Uncharacterized protein C1orf122	13.3737	10.5653	14.1399	13.9438	14.0372	14.2735	13.8975	13.6851	13.2207	13.2583	13.814	14.6045	13.8099	15.1963	13.3502	14.491		0.617006	0.502828	0.47863	1.27936
Q9NWV4	C1orf123	UPF0587 protein C1orf123	17.2318	17.2028	17.5698	17.0138	17.102	17.4857	17.0361	16.8888	17.2923	17.0157	16.9975	17.0005	17.0872	17.4419	17.2442	16.9875		0.290773	0.73323	-0.0579951	-0.690785
Q9H246	C1orf21	Uncharacterized protein C1orf21	10.3189	11.3987	12.6962	12.2158	12.5467	11.0858	16.6783	9.90094	11.4335	12.603	10.9615	13.5718	11.9113	14.4167	9.99581	18.2182		0.207556	0.809423	0.783807	0.518526
A0A0A0MSV6;D6R934;P02746	C1QB	Isoform of P02746. Complement C1q subcomponent subunit B (Fragment);Isoform of P02746. Complement C1q subcomponent subunit B;Complement C1q subcomponent subunit B	13.6218	13.3327	13.8467	14.3118	13.2844	12.9846	13.32	11.8456	13.034	12.8792	12.6872	13.8608	11.0407	12.5046	13.1256	12.1348		1.36825	0.192312	-0.660081	-2.47005
Q07021	C1QBP	Complement component 1 Q subcomponent-binding protein. mitochondrial	18.9505	18.7164	18.9875	18.4303	18.677	19.1934	18.6689	18.9224	19.5097	18.9892	18.8713	19.2718	19.2657	19.5325	19.0336	19.1002		2.11045	0.0708927	0.378454	3.69022
P02747	C1QC	Complement C1q subcomponent subunit C	15.4857	15.2411	15.4744	16.0817	16.0573	14.5745	14.7406	13.8933	15.275	15.5304	15.5547	15.3194	15.1364	14.9709	15.3612	14.9555		0.107932	0.902095	0.0693656	0.290364
B4DPQ0;F5H2D0;P00736	C1R	Isoform of P00736. Complement C1r subcomponent;Isoform of P00736. Complement C1r subcomponent;Complement C1r subcomponent	11.8871	11.9139	10.928	12.4606	10.8708	9.44349	10.231	11.3569	10.9967	10.9012	13.5994	11.9296	11.4199	11.966	10.0649	13.3909		0.560814	0.542609	0.647096	1.1844
Q9NZP8	C1RL	Complement C1r subcomponent-like protein	11.2937	11.2081	12.4337	13.2026	13.0423	11.604	11.6164	12.5519	10.6163	12.2959	9.9922	9.82573	10.4248	12.9684	13.9954	10.4047		0.483178	0.58869	-0.803674	-1.04975
A0A087X232;P09871	C1S	Isoform of P09871. Complement C1s subcomponent;Complement C1s subcomponent	14.4957	14.5145	13.9106	14.4057	14.312	12.3838	14.6142	13.7514	13.2489	9.71137	13.9891	14.486	14.0937	14.2067	13.6926	12.6933		0.552798	0.545821	-0.783269	-1.17069
P01024	C3	Complement C3	17.9149	18.1474	17.2395	18.2687	17.7114	17.315	17.4195	16.8933	17.3316	17.0693	17.3871	17.4927	17.4805	16.9475	17.7035	17.6582		0.497938	0.578662	-0.229897	-1.0757
A0A0G2JL54;A0A140TA29;A0A140TA32;A0A140TA44	C4B_2;C4B;C4A;C4A	Isoform of P0C0L5. Complement C4-B;Isoform of P0C0L5. Complement C4-B;Isoform of P0C0L4. Complement C4-A;Isoform of P0C0L4. Complement C4-A	16.1493	16.339	15.7766	16.8666	15.7704	16.0471	15.7954	15.9847	15.4056	16.0228	15.8735	16.0637	15.4556	15.8236	16.4642	16.218		0.456544	0.606743	-0.175287	-1.00246
P04003	C4BPA	C4b-binding protein alpha chain	14.4165	14.5168	13.3602	14.5795	13.2234	14.5716	13.6402	12.7187	13.3235	13.8147	14.2435	13.9015	14.26	13.3747	14.7073	14.0256		0.0733378	0.925964	0.0779816	0.203383
P01031	C5	Complement C5	14.0066	13.446	13.2061	14.2348	13.7794	14.4767	13.2025	11.0107	10.7509	13.2511	13.6003	13.9548	13.6232	12.5664	13.829	13.6876		0.164342	0.848861	-0.262455	-0.423056
Q9H799;Q9H799-5	C5orf42	Protein JBTS17;Isoform of Q9H799. Isoform 2 of Protein JBTS17	12.6855	11.5426	10.0098	10.2391	18.6152	15.3701	10.9134	10.4525	19.4976	25.444	9.32648	14.4897	10.6244	19.802	9.01996	18.6056		0.695514	0.456505	3.37269	1.40927
A0A140T9G8;Q0P5T2;Q5SQH8;Q5SQH8-2;Q5SQH8-3;Q5SQH8-4	C6orf136	Isoform of Q5SQH8. Uncharacterized protein C6orf136 (Fragment);Isoform of Q5SQH8. C6orf136 protein (Fragment);Uncharacterized protein C6orf136;Isoform of Q5SQH8. Isoform 2 of Uncharacterized protein C6orf136;Isoform of Q5SQH8. Isoform 3 of Uncharacterized protein C6orf136;Isoform of Q5SQH8. Isoform 4 of Uncharacterized protein C6orf136	12.284	10.9636	18.3433	9.51727	10.2747	11.6818	18.7658	17.5845	10.2914	10.9917	10.665	11.5786	9.39411	11.5816	12.1558	10.4961		1.12045	0.256133	-2.78259	-2.08273
A0A0D9SEI0;Q9P0P8	C6orf203	Isoform of Q9P0P8. Uncharacterized protein C6orf203;Uncharacterized protein C6orf203	16.3941	12.1358	10.3686	17.4283	11.3413	22.3206	10.8038	13.0553	13.5915	10.8133	16.2192	10.4368	17.2837	13.8997	14.7074	13.5325		0.0780838	0.922021	-0.420483	-0.215607
P10643	C7	Complement component C7	12.1073	11.6891	10.64	11.7222	11.2786	10.9183	10.5438	11.0237	10.2673	10.6608	10.8738	9.28863	10.8756	9.72648	10.6737	10.5897		1.46958	0.16761	-0.870882	-2.62991
P07357	C8A	Complement component C8 alpha chain	13.3784	14.8383	14.2312	13.9578	14.2359	12.4446	12.4397	13.9469	13.8488	12.0038	13.5534	13.9013	13.5311	12.0431	13.7674	13.5579		0.437476	0.615756	-0.408249	-0.968209
F5GY80;F5H7G1;P07358	C8B	Isoform of P07358. Complement component C8 beta chain;Isoform of P07358. Complement component C8 beta chain;Complement component C8 beta chain	12.5289	10.625	10.0166	12.3362	10.1072	10.3122	11.433	10.206	12.9812	10.4129	10.8209	11.7333	11.9648	15.0797	12.3441	12.0436		1.11466	0.256509	1.22693	2.07371
H0YF29;Q6P1X6;Q6P1X6-2	C8orf82	Isoform of Q6P1X6. UPF0598 protein C8orf82 (Fragment);UPF0598 protein C8orf82;Isoform of Q6P1X6. Isoform 2 of UPF0598 protein C8orf82	12.6613	11.9218	11.3835	12.7218	12.1651	9.3389	12.5399	12.1841	13.2098	13.0623	13.3942	12.5098	9.50221	12.4828	12.7241	11.6059		0.306642	0.717105	0.446823	0.722209
P02748	C9	Complement component C9	13.3851	13.9852	11.4395	15.1909	9.99185	13.8083	16.3366	14.3718	12.5908	9.67077	11.51	14.564	10.7345	10.3817	14.0125	14.2767		1.13608	0.250206	-1.34605	-2.1071
Q5T6V5	C9orf64	Queuosine salvage protein	11.0004	13.951	14.204	11.5744	11.4007	18.5557	13.3931	10.0709	10.588	11.4477	13.6622	13.2708	14.3082	12.3936	14.0798	13.0838		0.053901	0.947164	-0.164495	-0.152255
P00915	CA1	Carbonic anhydrase 1	19.7972	19.7722	19.5705	20.2679	20.2473	19.8932	19.2625	18.7884	19.1902	18.5249	19.5252	19.867	19.9361	19.9998	20.2322	19.7447		0.0998906	0.907366	-0.0723851	-0.270567
Q9ULX7	CA14	Carbonic anhydrase 14	15.0438	10.7951	10.6195	11.3198	10.5223	10.7904	10.1161	15.309	14.7414	14.627	14.5738	15.2299	14.1561	10.3809	15.8668	15.6227		1.76574	0.112908	2.58535	3.10714
P00918	CA2	Carbonic anhydrase 2	19.2575	19.0696	18.9696	19.3629	18.9919	19.1736	18.5169	18.7075	18.7607	18.5801	18.7966	19.162	18.9294	18.9287	18.8832	18.7726		0.772598	0.407228	-0.154533	-1.53437
P07451	CA3	Carbonic anhydrase 3	25.5244	25.9435	26.0803	25.7365	25.7458	26.1235	26.0797	25.6713	25.2002	25.5537	25.773	25.4923	25.4514	25.5791	26.0529	25.1261	+	3.10765	0.0206531	-0.334525	-5.6426
P22748	CA4	Carbonic anhydrase 4	15.1393	15.1765	14.906	14.4415	14.6651	15.4129	14.3672	14.9761	15.4855	14.4371	14.1026	14.447	14.178	14.6709	14.4561	14.552		1.21331	0.226365	-0.34441	-2.22755
Q9Y376	CAB39	Calcium-binding protein 39	15.3005	15.4433	15.9554	15.6479	16.1282	16.3451	16.1419	15.6071	15.6724	15.7533	15.6243	15.7272	16.0967	16.0524	15.9998	15.6606		0.00804623	0.988947	0.00216115	0.0238428
B1ALM3;Q13698	CACNA1S	Isoform of Q13698. Voltage-dependent L-type calcium channel subunit alpha;Voltage-dependent L-type calcium channel subunit alpha-1S	14.4519	14.5053	14.1979	14.0762	14.6057	14.3972	14.3776	14.9606	14.2206	14.5039	14.0167	14.1731	14.1605	14.0238	14.1941	14.2983		1.6245	0.134905	-0.247685	-2.87736
P54289	CACNA2D1	Voltage-dependent calcium channel subunit alpha-2/delta-1	17.11	17.3658	17.4821	17.2218	17.6251	17.3436	17.2281	17.1895	17.1151	17.2932	16.4933	17.007	17.1239	17.1922	16.9671	17.0816		1.39792	0.182972	-0.286569	-2.51673
Q02641-2	CACNB1	Isoform of Q02641. Isoform 2 of Voltage-dependent L-type calcium channel subunit beta-1	15.3213	15.335	15.1933	15.3321	15.4019	15.1247	15.1402	15.2991	15.029	15.0898	15.1151	14.9695	15.1386	14.7584	15.1358	15.0869	+	2.81506	0.0314375	-0.22808	-5.01975
F8VU10;F8VUW8;P54284;P54284-2;P54284-3;P54284-4;P54284-5	CACNB3	Isoform of P54284. Voltage-dependent L-type calcium channel subunit beta-3 (Fragment);Isoform of P54284. Voltage-dependent L-type calcium channel subunit beta-3 (Fragment);Voltage-dependent L-type calcium channel subunit beta-3;Isoform of P54284. Isoform 2 of Voltage-dependent L-type calcium channel subunit beta-3;Isoform of P54284. Isoform 3 of Voltage-dependent L-type calcium channel subunit be…	14.4225	11.5237	15.0653	12.5887	14.8115	15.2198	14.4325	14.4183	14.4135	14.9682	13.2407	14.182	15.326	14.508	12.9037	14.6568		0.134598	0.873769	0.214558	0.354361
Q06432	CACNG1	Voltage-dependent calcium channel gamma-1 subunit	17.2907	17.3889	17.3899	16.7173	17.5288	17.9646	17.2539	17.4675	17.1401	16.9697	17.0032	16.4156	17.1776	17.4297	17.2232	17.37	+	2.60618	0.0408889	-0.284077	-4.60266
Q9HB71;Q9HB71-3	CACYBP	Calcyclin-binding protein;Isoform of Q9HB71. Isoform 3 of Calcyclin-binding protein	11.6815	12.7761	12.8385	11.967	13.0453	10.9533	11.6886	12.4872	15.6694	12.2605	15.3886	14.8912	12.4034	12.0398	11.114	14.7578		1.17354	0.236618	1.38588	2.16551
F8VQE3;Q9P1Z2;Q9P1Z2-2;Q9P1Z2-3;Q9P1Z2-4	CALCOCO1	Isoform of Q9P1Z2. Calcium-binding and coiled-coil domain-containing protein 1 (Fragment);Calcium-binding and coiled-coil domain-containing protein 1;Isoform of Q9P1Z2. Isoform 2 of Calcium-binding and coiled-coil domain-containing protein 1;Isoform of Q9P1Z2. Isoform 3 of Calcium-binding and coiled-coil domain-containing protein 1;Isoform of Q9P1Z2. Isoform 4 of Calcium-binding and coiled-coil d…	11.3324	11.2539	11.893	9.78332	10.5548	13.0114	11.8606	11.0503	11.8369	11.0177	10.111	12.026	9.77451	12.1283	11.91	10.6369		0.148418	0.862523	-0.162279	-0.386609
D6REB0;Q13137;Q13137-3;Q13137-4;Q13137-5	CALCOCO2	Isoform of Q13137. Calcium-binding and coiled-coil domain-containing protein 2 (Fragment);Calcium-binding and coiled-coil domain-containing protein 2;Isoform of Q13137. Isoform 3 of Calcium-binding and coiled-coil domain-containing protein 2;Isoform of Q13137. Isoform 4 of Calcium-binding and coiled-coil domain-containing protein 2;Isoform of Q13137. Isoform 5 of Calcium-binding and coiled-coil d…	11.3852	11.1973	12.8666	9.21181	10.1525	12.1561	11.3162	12.5861	12.8905	10.1056	12.4116	10.3701	9.3227	11.7595	12.4023	12.8171		0.167361	0.846109	0.150931	0.429884
E7EX44;Q05682-3	CALD1	Isoform of Q05682. Caldesmon;Isoform of Q05682. Isoform 3 of Caldesmon	16.6085	16.5392	16.3395	15.9193	16.6123	16.5362	16.3672	15.9805	17.0662	16.2806	16.212	16.9824	16.64	17.4673	16.7284	16.5041		1.20341	0.226217	0.3723	2.21211
Q05682	CALD1	Caldesmon	15.7306	13.9021	15.5571	10.84	15.4233	10.3993	16.378	9.47532	14.4715	15.2063	9.63355	14.9471	15.6024	14.7345	15.3871	11.2124		0.14257	0.867343	0.436131	0.373035
E7ETZ0;H0Y7A7;P0DP23;P0DP24;P0DP25	CALM1;CALM2;CALM1;CALM2;CALM3	Isoform of P0DP23. Calmodulin-1;Isoform of P0DP23. Calmodulin-2 (Fragment);Calmodulin-1;Calmodulin-2;Calmodulin-3	21.8751	22.1827	22.0858	22.41	22.6409	22.3337	22.0606	21.9491	22.2588	23.1068	21.8376	22.5018	22.929	23.4065	22.3324	22.6141		1.57199	0.145449	0.431108	2.79301
P27797	CALR	Calreticulin	18.0129	18.3034	18.2109	18.1625	18.2035	18.1216	17.9574	17.9328	18.3326	18.0814	17.857	18.5578	18.4455	18.7936	18.1215	17.7722		0.493566	0.581704	0.132065	1.06803
O43852;O43852-3	CALU	Calumenin;Isoform of O43852. Isoform 3 of Calumenin	17.2044	17.5681	17.5263	17.4007	17.4082	17.5307	17.1605	17.0265	17.8064	17.1986	17.1651	17.5413	17.5199	18.4379	17.149	17.2637		0.46291	0.601425	0.157045	1.01382
O43852-2;O43852-4	CALU	Isoform of O43852. Isoform 2 of Calumenin;Isoform of O43852. Isoform 4 of Calumenin	16.5535	16.5795	16.2499	16.2814	16.2423	16.6666	15.8062	16.2017	16.614	15.7269	15.9609	16.3621	16.481	17.8863	17.0216	16.3465		0.408627	0.636352	0.227289	0.915703
Q9UQM7-2	CAMK2A	Isoform of Q9UQM7. Isoform B of Calcium/calmodulin-dependent protein kinase type II subunit alpha	15.1062	14.2136	14.3695	14.7273	15.3314	14.5826	14.6157	14.6418	14.459	14.0247	15.1885	14.3581	14.2192	14.2761	14.9331	14.0099		0.597275	0.523088	-0.264929	-1.24622
Q13554	CAMK2B	Calcium/calmodulin-dependent protein kinase type II subunit beta	14.2194	13.6614	13.5603	13.909	13.8815	14.0612	14.3613	14.2681	14.1563	14.2087	14.4949	13.8714	14.1476	14.258	14.5211	14.4954		1.33732	0.197147	0.278882	2.42148
Q13557-10;Q13557-11;Q13557-6	CAMK2D	Isoform of Q13557. Isoform Delta 10 of Calcium/calmodulin-dependent protein kinase type II subunit delta;Isoform of Q13557. Isoform Delta 11 of Calcium/calmodulin-dependent protein kinase type II subunit delta;Isoform of Q13557. Isoform Delta 9 of Calcium/calmodulin-dependent protein kinase type II subunit delta	15.1194	14.9274	14.3077	14.5216	14.5757	15.086	15.1228	15.0267	15.0812	15.0434	15.4824	14.5448	15.2285	15.7727	14.9964	15.1564		1.08092	0.264837	0.327332	2.02106
A0A0A0MS52;Q13555-5;Q13555-6;Q5SWX3	CAMK2G	Isoform of Q13555. Calcium/calmodulin-dependent protein kinase (CaM kinase) II gamma. isoform CRA_a;Isoform of Q13555. Isoform 5 of Calcium/calmodulin-dependent protein kinase type II subunit gamma;Isoform of Q13555. Isoform 6 of Calcium/calmodulin-dependent protein kinase type II subunit gamma;Isoform of Q13555. Calcium/calmodulin-dependent protein kinase (CaM kinase) II gamma. isoform CRA_n	13.5738	13.2882	13.1062	13.4053	13.3253	12.7812	13.3878	13.4165	13.5973	13.3588	13.6692	13.0796	13.2141	12.8731	13.9356	13.3258		0.383985	0.654945	0.0961447	0.870147
Q86VP6	CAND1	Cullin-associated NEDD8-dissociated protein 1	15.3512	14.8365	14.6111	14.867	14.7174	14.5376	14.2274	14.1385	14.6111	14.2492	14.3638	14.6094	14.6337	14.8838	15.0081	14.2487		0.192358	0.822311	-0.0848649	-0.485485
O75155	CAND2	Cullin-associated NEDD8-dissociated protein 2	15.214	14.6826	15.0027	14.7323	15.0379	14.7484	14.866	14.9756	15.0873	15.0183	14.5574	15.0896	14.8392	14.7608	14.9672	15.145		0.097412	0.9098	0.0256733	0.264416
P27824;P27824-2	CANX	Calnexin;Isoform of P27824. Isoform 2 of Calnexin	15.8666	15.8485	15.672	15.5734	15.8674	15.8534	15.6677	15.78	16.2458	15.726	15.826	15.7008	16.1262	16.6618	16.0763	16.0482		1.69887	0.120386	0.285281	2.99779
Q01518	CAP1	Adenylyl cyclase-associated protein 1	16.656	16.3962	16.2949	15.8321	15.8451	16.1657	15.6494	15.2366	16.4289	15.8673	15.9591	15.9684	15.9939	16.1791	16.2019	16.0394		0.17414	0.837121	0.0702605	0.445126
P40123	CAP2	Adenylyl cyclase-associated protein 2	17.4153	17.4307	17.5359	17.2415	17.7124	17.7484	17.5062	17.313	17.3645	17.0954	17.0029	17.2941	17.6161	17.2012	17.6414	17.4544		0.77851	0.404121	-0.154201	-1.54388
P40121	CAPG	Macrophage-capping protein	13.9424	14.0859	13.536	13.7499	11.9019	10.8164	15.0407	15.3256	10.6707	13.0782	13.1154	13.2958	12.6231	13.4656	13.6928	12.5824		0.515535	0.566638	-0.734347	-1.10641
P07384	CAPN1	Calpain-1 catalytic subunit	15.4973	15.2968	15.4596	15.3854	15.6615	15.3205	15.5733	15.2612	15.5479	15.5078	15.1495	15.2433	15.172	15.0715	15.1042	14.9896		1.34787	0.195382	-0.20871	-2.43803
P17655	CAPN2	Calpain-2 catalytic subunit	16.3674	16.4148	16.1458	16.279	16.4224	16.3924	16.3608	16.4438	16.8248	16.0034	16.124	16.0347	16.4714	16.5929	16.3611	16.5043		0.0424777	0.957035	0.0112805	0.121352
P20807	CAPN3	Calpain-3	16.1188	16.135	16.4657	16.3271	16.6313	16.4467	16.1779	16.3383	16.3001	16.8135	16.1687	16.4106	16.8583	16.5445	16.2565	16.7111		0.94466	0.322995	0.177805	1.80774
A0A0C4DGQ5;P04632	CAPNS1	Isoform of P04632. Calpain small subunit 1;Calpain small subunit 1	17.092	17.0591	16.6645	16.9902	16.8295	16.8903	17.0183	16.961	17.0177	16.8658	16.8469	16.8456	16.9313	16.9821	17.0904	17.1729		0.237775	0.778103	0.0309756	0.582667
Q14444	CAPRIN1	Caprin-1	15.502	21.3235	21.7919	21.4922	21.8898	21.7163	21.6233	21.267	21.4955	21.459	21.1679	21.8702	21.7844	21.6919	21.4618	21.5731		0.439217	0.615009	0.737217	0.971351
P52907	CAPZA1	F-actin-capping protein subunit alpha-1	15.4872	14.6087	14.3375	15.1129	14.7877	15.0169	14.8562	14.5442	15.2427	15.1753	14.917	14.8797	15.0202	15.1764	14.8377	15.0715		0.826	0.377121	0.196148	1.61993
P47755	CAPZA2	F-actin-capping protein subunit alpha-2	17.5612	17.0673	17.3187	17.1748	17.1648	17.2511	17.4091	17.3256	17.2638	17.2589	17.6671	17.1871	17.1967	17.3901	17.3632	17.1807		0.159948	0.850496	0.0293775	0.41307
P47756	CAPZB	F-actin-capping protein subunit beta	18.0862	18.1226	17.7406	17.7445	18.0143	18.2956	18.4018	18.3235	18.2786	18.249	18.3983	17.574	18.3357	18.3185	18.4574	18.6588		1.18327	0.233577	0.192651	2.18069
Q96LW7-2	CARD19	Isoform of Q96LW7. Isoform 2 of Caspase recruitment domain-containing protein 19	10.1148	11.804	10.2201	9.45833	11.0515	12.0018	12.2505	10.1459	12.6372	13.9566	13.0338	13.3498	13.1262	11.0283	13.2993	13.0489		2.26183	0.0561399	2.05415	3.95848
Q9Y2V2	CARHSP1	Calcium-regulated heat-stable protein 1	14.8601	14.5599	14.729	14.7683	14.9113	14.8635	14.9059	13.9363	15.2768	13.7044	10.6298	14.6117	14.9725	14.8192	14.3078	14.2381		0.568514	0.536818	-0.621744	-1.19752
Q86X55;Q86X55-1	CARM1	Histone-arginine methyltransferase CARM1;Isoform of Q86X55. Isoform 1 of Histone-arginine methyltransferase CARM1	15.7247	10.8463	13.7977	14.9852	15.4499	15.1879	14.9952	16.4657	13.988	10.0839	14.8003	14.0125	18.8061	15.2309	13.8634	15.6327		0.0814014	0.919025	-0.129342	-0.224094
A5YM72;A5YM72-3;A5YM72-5	CARNS1	Carnosine synthase 1;Isoform of A5YM72. Isoform 3 of Carnosine synthase 1;Isoform of A5YM72. Isoform 5 of Carnosine synthase 1	15.0018	13.9453	13.0727	14.1799	10.0822	13.9437	14.3594	15.3878	15.4039	14.9179	15.4174	15.1443	15.0051	14.8264	15.4661	16.2085		1.68887	0.121658	1.55211	2.98152
B4DKY1;P49589;P49589-2;P49589-3	CARS	Isoform of P49589. Cysteine--tRNA ligase. cytoplasmic;Cysteine--tRNA ligase. cytoplasmic;Isoform of P49589. Isoform 2 of Cysteine--tRNA ligase. cytoplasmic;Isoform of P49589. Isoform 3 of Cysteine--tRNA ligase. cytoplasmic	13.6344	13.0999	13.752	14.0287	14.3106	14.1516	14.2886	14.0504	14.1904	13.3821	13.6212	13.4969	14.1386	14.2484	13.3558	14.1969		0.205329	0.810873	-0.085752	-0.513718
Q9HA77	CARS2	Probable cysteine--tRNA ligase. mitochondrial	14.8491	14.5734	14.4467	16.4938	13.7009	14.2047	10.7774	14.7337	14.7271	14.4635	14.4709	14.1056	13.9249	13.5351	13.7851	14.2965		0.0391272	0.959161	-0.0588912	-0.112159
P31415	CASQ1	Calsequestrin-1	22.1339	22.2943	22.6891	22.7574	22.5557	22.3349	22.0416	22.1881	22.2136	22.3935	21.6849	22.6357	22.7892	22.3874	22.217	22.4894		0.0554574	0.945337	-0.0230298	-0.156415
O14958	CASQ2	Calsequestrin-2	18.2467	18.4342	18.6074	18.26	17.6056	17.9351	18.2582	18.2502	18.0853	18.1917	17.8775	18.327	17.6812	18.7424	18.3313	17.7458		0.185863	0.827146	-0.0769076	-0.471194
P20810-6;P20810-7	CAST	Isoform of P20810. Isoform 6 of Calpastatin;Isoform of P20810. Isoform 7 of Calpastatin	16.4103	16.5586	15.6773	15.5815	16.0337	15.6259	15.0301	15.1004	15.2875	15.2774	14.5351	15.3214	16.056	16.42	15.4524	15.3345		0.474196	0.593096	-0.291706	-1.03387
A6NHX0	CASTOR2	Cytosolic arginine sensor for mTORC1 subunit 2	10.4198	13.9343	14.0619	13.3032	14.2284	14.0752	13.6018	13.4974	12.9329	13.2594	12.9209	13.5075	13.9028	10.5618	11.9867	12.7116		0.517758	0.564568	-0.667298	-1.11027
P04040	CAT	Catalase	19.1627	18.9354	18.7013	19.1621	18.3436	18.6369	18.2929	17.7537	18.3039	17.8038	18.1508	18.808	18.3571	18.3386	18.5916	18.185		0.811311	0.387969	-0.306242	-1.59647
Q03135	CAV1	Caveolin-1	17.2667	16.695	17.6127	17.2709	17.9121	17.7449	17.2787	17.2048	17.851	17.6656	17.1041	17.6996	17.7859	18.2662	17.4334	17.7158		1.02906	0.284413	0.316988	1.94005
E9PCT3;P51636;P51636-2	CAV2	Isoform of P51636. Caveolin;Caveolin-2;Isoform of P51636. Isoform Beta of Caveolin-2	14.666	14.7108	14.5988	14.5299	14.6042	14.5997	14.3089	14.5132	14.9662	14.3852	14.387	14.9371	14.7435	15.3536	14.6227	14.3658		0.567278	0.538426	0.153694	1.19542
P56539	CAV3	Caveolin-3	15.6128	14.9459	16.6544	15.7974	15.9643	15.2992	15.32	14.2318	15.0817	15.3356	14.3691	15.3605	14.8497	15.8786	15.5944	15.2722		0.289119	0.733738	-0.260494	-0.687487
Q6NZI2	CAVIN1	Caveolae-associated protein 1	19.0759	19.087	19.3297	18.8525	19.2839	19.1715	18.6562	18.8355	19.3903	19.1128	18.6388	19.1432	19.2802	19.4468	19.0608	18.9036		0.293246	0.730512	0.0855541	0.695709
O95810	CAVIN2	Caveolae-associated protein 2	16.8353	17.1335	17.1506	16.6607	17.0167	17.1097	16.5192	16.6605	17.0316	16.8883	16.1292	16.8018	16.9981	17.4135	16.6829	16.7218		0.132232	0.877116	-0.0523779	-0.34878
E9PIE3;Q969G5	CAVIN3	Isoform of Q969G5. Caveolae-associated protein 3;Caveolae-associated protein 3	14.7851	14.0409	14.402	14.0198	14.6734	14.0722	14.5572	14.5059	15.1666	15.3422	14.7891	14.8406	15.055	14.5536	14.8546	14.6373		2.28217	0.0543597	0.52279	3.99517
Q5BKX8	CAVIN4	Caveolae-associated protein 4	17.9172	17.816	17.683	17.6677	17.138	17.7667	18.1044	18.0962	17.5418	17.6539	18.325	17.7198	17.7102	18.2945	18.4819	17.7525		0.50249	0.574824	0.161301	1.08367
H3BNH2;O75081;O75081-2;O75081-4	CBFA2T3	Isoform of O75081. Protein CBFA2T3 (Fragment);Protein CBFA2T3;Isoform of O75081. Isoform 2 of Protein CBFA2T3;Isoform of O75081. Isoform 3 of Protein CBFA2T3	12.336	11.3817	12.3506	13.0752	13.6477	12.9323	12.8858	11.8068	12.0058	13.313	13.2718	13.291	13.3491	12.6168	10.6782	13.8145		0.195495	0.819032	0.240524	0.492351
Q13951-2	CBFB	Isoform of Q13951. Isoform 2 of Core-binding factor subunit beta	11.4923	10.6075	13.375	13.3493	13.6266	12.5256	12.3166	12.0658	12.4875	13.5151	12.1412	12.6823	12.2107	13.7663	11.7764	12.3237		0.14249	0.867102	0.193069	0.37285
P16152	CBR1	Carbonyl reductase [NADPH] 1	17.0915	16.9219	17.2424	17.194	17.2663	17.1016	17.1451	16.2525	17.1545	16.8777	17.0165	17.5211	17.3767	16.7579	17.3543	16.2761		0.0690845	0.930404	0.0149162	0.192344
O75828	CBR3	Carbonyl reductase [NADPH] 3	14.4221	13.6572	13.8969	14.5042	14.0001	14.0294	14.3647	10.6256	14.4402	13.2947	14.9612	14.7276	14.4099	14.4318	15.144	14.0304		0.945389	0.322715	0.742458	1.80889
Q8N4T8	CBR4	Carbonyl reductase family member 4	15.7117	15.5809	15.4046	14.686	16.1521	15.6088	14.8556	15.2332	16.0056	15.2422	15.0387	15.9465	15.3177	15.2601	15.6959	15.612		0.173321	0.838283	0.110715	0.443289
J3KS05;P83916	CBX1	Isoform of P83916. Chromobox protein homolog 1 (Fragment);Chromobox protein homolog 1	13.8244	14.2304	15.4439	14.7885	15.0915	14.2859	12.8934	14.888	10.7179	15.4885	15.8758	14.9725	15.2662	15.3346	14.3789	14.9777		0.147668	0.862081	0.195789	0.384874
Q13185	CBX3	Chromobox protein homolog 3	13.2924	13.1072	13.2162	12.984	13.2036	13.5147	13.0959	12.1941	13.4476	13.3601	13.2453	13.2313	13.6244	13.4064	13.5137	13.3979		1.27888	0.214191	0.32735	2.32997
P45973	CBX5	Chromobox protein homolog 5	12.1464	12.1358	10.159	11.5534	10.3785	10.1765	10.5518	8.8236	10.631	13.082	11.3223	11.0195	13.0821	11.8764	14.3004	10.311		1.10134	0.261018	1.21243	2.05292
Q6P1N0;Q6P1N0-2	CC2D1A	Coiled-coil and C2 domain-containing protein 1A;Isoform of Q6P1N0. Isoform 2 of Coiled-coil and C2 domain-containing protein 1A	11.2567	11.4252	11.7677	10.8691	12.7702	12.3667	11.6794	11.1172	12.4077	12.6636	12.4639	10.5257	12.0744	11.0225	9.78612	11.7352		0.0614632	0.938365	-0.0716501	-0.172357
Q8IX12;Q8IX12-2	CCAR1	Cell division cycle and apoptosis regulator protein 1;Isoform of Q8IX12. Isoform 2 of Cell division cycle and apoptosis regulator protein 1	12.3395	10.8023	12.332	11.085	11.0529	10.4724	9.7294	13.5936	13.3338	10.3166	13.5695	9.70429	11.5626	13.3486	10.5815	12.8916		0.472999	0.593095	0.487672	1.03175
Q8N163;Q8N163-2	CCAR2	Cell cycle and apoptosis regulator protein 2;Isoform of Q8N163. Isoform 2 of Cell cycle and apoptosis regulator protein 2	13.1095	17.0197	13.889	14.112	14.6662	13.923	13.8307	13.4321	13.1577	16.7962	13.2135	13.9858	17.0613	13.043	13.4354	12.1207		0.141165	0.866816	-0.146083	-0.369758
Q96CT7	CCDC124	Coiled-coil domain-containing protein 124	15.0814	15.2192	14.9859	14.7637	15.0925	15.4713	14.7613	14.7716	15.1088	14.9591	14.4936	14.7207	15.3334	15.793	15.3316	14.6475		0.0919297	0.912927	0.0301095	0.250725
Q9BUN5	CCDC28B	Coiled-coil domain-containing protein 28B	13.6953	13.6322	11.8619	11.1697	14.2229	13.504	13.208	13.5438	14.2532	14.953	13.6844	14.7654	14.4583	13.7392	14.0145	13.5948		1.43862	0.172534	1.0781	2.58092
Q86WV7;Q96MW1	CCDC43	Isoform of Q96MW1. CCDC43 protein;Coiled-coil domain-containing protein 43	13.8366	14.3571	14.6548	14.1533	14.3983	14.4466	13.5625	13.58	14.2051	14.1155	13.3195	13.6207	14.293	14.7435	13.609	13.2125		0.581133	0.53043	-0.233788	-1.21895
Q8IVM0;Q8IVM0-2	CCDC50	Coiled-coil domain-containing protein 50;Isoform of Q8IVM0. Isoform 2 of Coiled-coil domain-containing protein 50	10.7596	10.6193	11.1057	10.7186	10.4256	12.4254	11.7124	9.42761	12.3226	11.7129	11.619	12.4585	12.4171	13.6082	12.7363	11.8997	+	3.51747	0.0205217	1.44753	6.60194
Q96ER9;Q96ER9-2	CCDC51	Coiled-coil domain-containing protein 51;Isoform of Q96ER9. Isoform 2 of Coiled-coil domain-containing protein 51	13.7474	11.614	9.93667	11.6051	10.0129	10.6982	9.92407	13.7742	13.9285	13.6554	13.32	13.572	11.1945	12.2178	13.6166	12.7292		1.65398	0.128145	1.61521	2.92495
Q4VC31	CCDC58	Coiled-coil domain-containing protein 58	14.8681	14.7862	14.8332	15.0615	14.6347	14.7197	15.0927	14.7157	15.3754	14.8866	15.0156	15.1757	14.9908	14.9343	14.5819	14.9345		0.692716	0.458444	0.147859	1.40469
Q16204	CCDC6	Coiled-coil domain-containing protein 6	10.4592	11.6153	14.9622	14.3888	14.7442	11.1991	10.2746	11.6962	11.4687	12.3775	11.0682	14.7922	15.7207	11.5288	15.0346	15.5783		0.52329	0.562505	1.02868	1.11987
Q9Y3X0	CCDC9	Coiled-coil domain-containing protein 9	14.2785	11.6027	14.455	14.1834	11.37	14.2164	13.8703	13.8291	14.1261	13.9155	13.6781	14.4987	13.7176	14.5013	14.2247	14.0302		0.774047	0.407022	0.610843	1.5367
A0A0A0MTK0;A0A0A0MTP0;Q7Z6B0;Q7Z6B0-2;Q7Z6B0-3	CCDC91	Isoform of Q7Z6B0. Coiled-coil domain-containing protein 91;Isoform of Q7Z6B0. Coiled-coil domain-containing protein 91;Coiled-coil domain-containing protein 91;Isoform of Q7Z6B0. Isoform 2 of Coiled-coil domain-containing protein 91;Isoform of Q7Z6B0. Isoform 3 of Coiled-coil domain-containing protein 91	14.8302	11.0443	14.6783	14.6792	12.7262	13.8859	13.7117	10.9202	14.1476	14.5506	14.0584	14.8613	11.9661	12.1884	13.9201	14.5163		0.276113	0.742758	0.466588	0.661384
F8W9X7;Q567U6	CCDC93	Isoform of Q567U6. Coiled-coil domain-containing protein 93;Coiled-coil domain-containing protein 93	10.7867	11.4875	12.8266	13.0878	12.7914	12.1066	12.853	10.8153	10.6246	12.4042	12.0127	12.0397	13.1141	10.3252	12.0046	11.9504		0.342131	0.689378	-0.284916	-0.791098
H3BR23;O95273;O95273-2	CCNDBP1	Isoform of O95273. Cyclin-D1-binding protein 1;Cyclin-D1-binding protein 1;Isoform of O95273. Isoform 2 of Cyclin-D1-binding protein 1	12.0912	11.7848	12.6279	12.1671	13.0111	12.3261	12.7582	12.3141	12.1109	12.7542	12.4103	12.3275	12.8086	12.6883	12.4875	12.6155		0.433826	0.617625	0.1403	0.961613
J3KNF4;O14618	CCS	Isoform of O14618. Copper chaperone for superoxide dismutase;Copper chaperone for superoxide dismutase	13.6297	14.4058	14.9956	13.4818	14.5968	13.5638	13.3362	12.6637	12.9534	13.871	13.1965	13.8042	15.1632	14.3148	14.2878	15.0363		0.222455	0.794482	0.244232	0.550398
Q4G0I0	CCSMST1	Protein CCSMST1	10.6595	11.5977	10.679	10.9677	10.1374	13.1756	12.7027	12.9062	13.3036	10.6992	12.9423	10.262	13.105	13.5728	12.9534	12.9615		0.821287	0.379946	0.871762	1.61241
P78371	CCT2	T-complex protein 1 subunit beta	14.1212	14.1226	14.5418	14.5881	14.4241	14.634	14.3958	14.5903	14.6056	14.5877	15.0932	14.4847	14.7827	14.4373	14.3922	14.8578		1.21022	0.226861	0.227934	2.22274
P49368	CCT3	T-complex protein 1 subunit gamma	15.6296	15.9162	15.816	16.1406	15.9395	15.4691	15.1202	15.6429	15.7621	15.8407	15.7992	16.105	15.588	15.6128	16.0596	15.6092		0.275495	0.7422	0.0878117	0.660137
P50991	CCT4	T-complex protein 1 subunit delta	15.121	14.6134	15.1248	14.8435	15.3393	14.8982	14.7304	14.7542	15.0965	15.1913	14.689	15.0964	15.0116	14.6543	14.9468	15.0965		0.133578	0.875144	0.0446972	0.351957
P48643	CCT5	T-complex protein 1 subunit epsilon	14.7716	14.4027	14.518	14.3512	14.5305	14.633	14.4569	14.7245	15.047	13.0845	14.7905	14.4748	14.7293	12.7504	15.0855	15.1078		0.20441	0.81076	-0.164852	-0.511731
P40227	CCT6A	T-complex protein 1 subunit zeta	14.1767	14.0672	13.9225	13.8424	14.174	13.8689	13.7344	13.8528	14.2095	14.1372	13.9109	14.0001	14.2399	13.9726	14.4503	14.3781		1.20698	0.226045	0.207491	2.21767
Q99832	CCT7	T-complex protein 1 subunit eta	14.4582	13.995	14.012	14.3911	14.4119	14.3335	14.2216	14.3095	14.4473	14.5424	14.1372	14.5026	14.7477	13.9559	14.4361	14.6806		0.851752	0.366912	0.164614	1.66093
P50990	CCT8	T-complex protein 1 subunit theta	15.6888	15.6734	15.7784	15.6598	15.6221	15.3578	15.7303	15.5749	15.6182	15.8239	15.4627	15.5608	15.9173	15.233	15.6618	15.5919		0.160016	0.850691	-0.0269915	-0.413226
F8WD66;P86790;P86791	CCZ1B;CCZ1B;CCZ1	Isoform of P86790. Vacuolar fusion protein CCZ1 homolog;Vacuolar fusion protein CCZ1 homolog B;Vacuolar fusion protein CCZ1 homolog	18.9141	19.7063	21.3011	19.6838	19.9789	20.6787	19.0791	17.7544	18.5665	18.971	17.0451	19.6545	19.4746	20.7577	18.142	18.5293		0.68332	0.465584	-0.744478	-1.38927
P08571	CD14	Monocyte differentiation antigen CD14	9.99146	11.6038	12.2176	11.691	10.1893	11.6808	11.8009	10.5136	12.3889	14.244	11.9478	11.9877	12.327	13.1076	11.9169	12.8248		1.90881	0.0865726	1.38202	3.34491
E9PMR4;E9PRJ3;P48509	CD151	Isoform of P48509. Tetraspanin;Isoform of P48509. Tetraspanin (Fragment);CD151 antigen	12.4644	10.9005	12.4924	10.1242	12.0946	10.639	12.6989	12.3187	13.3349	9.99833	12.7677	12.9556	13.2357	13.2616	11.0884	13.475		0.728042	0.434934	0.798072	1.46232
Q9NR16;Q9NR16-2;Q9NR16-3;Q9NR16-4	CD163L1	Scavenger receptor cysteine-rich type 1 protein M160;Isoform of Q9NR16. Isoform 2 of Scavenger receptor cysteine-rich type 1 protein M160;Isoform of Q9NR16. Isoform 3 of Scavenger receptor cysteine-rich type 1 protein M160;Isoform of Q9NR16. Isoform 4 of Scavenger receptor cysteine-rich type 1 protein M160	13.4303	11.8263	12.3089	13.894	10.4136	12.935	10.2472	10.3315	12.6583	11.8522	12.4874	13.9503	11.8704	12.2861	12.9969	11.6429		0.619673	0.50133	0.544737	1.28382
Q9Y5K6	CD2AP	CD2-associated protein	10.2888	11.2294	12.7259	10.515	11.2267	10.4874	9.10141	10.582	9.80036	12.4909	12.1181	12.0548	13.0128	12.6888	11.4853	12.5668		1.72559	0.118591	1.25766	3.04136
O95400	CD2BP2	CD2 antigen cytoplasmic tail-binding protein 2	11.2585	9.82821	12.5954	10.4514	12.1432	11.1437	12.018	11.4061	12.3148	11.8922	12.2907	12.3679	12.6802	13.9646	9.81902	12.5147		0.796595	0.394802	0.874949	1.57291
Q6UXG3;Q6UXG3-2;Q6UXG3-3;Q6UXG3-4;Q6UXG3-5	CD300LG	CMRF35-like molecule 9;Isoform of Q6UXG3. Isoform 2 of CMRF35-like molecule 9;Isoform of Q6UXG3. Isoform 3 of CMRF35-like molecule 9;Isoform of Q6UXG3. Isoform 4 of CMRF35-like molecule 9;Isoform of Q6UXG3. Isoform 5 of CMRF35-like molecule 9	11.6675	11.2185	11.5379	10.5759	11.187	11.8245	12.6318	13.5795	11.2782	12.0076	12.8766	9.55431	14.023	14.2048	13.8141	13.9251		1.08355	0.264651	0.932659	2.02516
P28906;Q5JTA5	CD34	Hematopoietic progenitor cell antigen CD34;Isoform of P28906. Hematopoietic progenitor cell antigen CD34	12.2691	14.0639	13.5493	13.6218	12.3819	12.4581	11.6131	12.1397	13.7737	13.581	12.7841	14.0783	13.9963	14.5843	14.069	13.3468		1.34994	0.196667	1.01456	2.44128
E7EU05;P16671	CD36	Isoform of P16671. Platelet glycoprotein 4 (Fragment);Platelet glycoprotein 4	17.0569	17.421	17.1787	17.1433	17.2757	17.0867	17.1752	16.8724	17.1093	17.5228	16.3958	17.605	17.143	17.293	17.0811	16.7237		0.123782	0.887438	-0.0420413	-0.328696
P28907	CD38	ADP-ribosyl cyclase/cyclic ADP-ribose hydrolase 1	13.5198	14.1564	14.6874	14.9026	15.2955	14.7539	13.7324	13.5851	13.9731	14.4447	13.4245	14.4533	15.0645	14.6956	12.3179	14.3951		0.365087	0.669383	-0.233028	-0.834728
H0YD13;P16070;P16070-10;P16070-11;P16070-12;P16070-13;P16070-14;P16070-16;P16070-17;P16070-18;P16070-3;P16070-4;P16070-5;P16070-6;P16070-7;P16070-8	CD44	Isoform of P16070. CD44 antigen;CD44 antigen;Isoform of P16070. Isoform 10 of CD44 antigen;Isoform of P16070. Isoform 11 of CD44 antigen;Isoform of P16070. Isoform 12 of CD44 antigen;Isoform of P16070. Isoform 13 of CD44 antigen;Isoform of P16070. Isoform 14 of CD44 antigen;Isoform of P16070. Isoform 16 of CD44 antigen;Isoform of P16070. Isoform 17 of CD44 antigen;Isoform of P16070. Isoform 18 of…	14.247	14.1824	14.0478	13.9054	14.4378	13.8739	13.2511	13.0602	14.4316	13.5785	13.8596	13.6396	13.8648	15.176	14.5965	13.393		0.297395	0.727279	0.191758	0.703947
P15529-2;P15529-3;P15529-4;P15529-5;P15529-6;P15529-7	CD46	Isoform of P15529. Isoform B of Membrane cofactor protein;Isoform of P15529. Isoform D of Membrane cofactor protein;Isoform of P15529. Isoform F of Membrane cofactor protein;Isoform of P15529. Isoform H of Membrane cofactor protein;Isoform of P15529. Isoform J of Membrane cofactor protein;Isoform of P15529. Isoform L of Membrane cofactor protein	9.99193	11.839	10.8096	10.1909	11.2431	10.9298	11.1924	11.0411	11.7623	11.1003	10.82	11.5369	11.392	10.6521	10.8875	9.62873		0.0656614	0.933054	0.0677495	0.1834
B1AMW1;P19256;P19256-2;P19256-3	CD58	Isoform of P19256. CD58 antigen. (Lymphocyte function-associated antigen 3). isoform CRA_c;Lymphocyte function-associated antigen 3;Isoform of P19256. Isoform 2 of Lymphocyte function-associated antigen 3;Isoform of P19256. Isoform 3 of Lymphocyte function-associated antigen 3	11.6835	11.1543	12.3502	10.384	12.1032	10.2185	11.9299	11.1376	12.4494	11.7186	11.6796	10.5219	12.2615	12.1922	9.14878	11.8855		0.0830366	0.918379	0.112025	0.22826
E9PNW4;E9PR17;P13987	CD59	Isoform of P13987. CD59 glycoprotein;Isoform of P13987. CD59 glycoprotein;CD59 glycoprotein	17.0817	17.4937	17.8483	17.5332	17.933	17.6341	16.846	16.7763	17.1049	17.4512	16.9465	18.3113	17.8135	18.2965	17.2639	17.5278		0.436691	0.615772	0.196169	0.966792
F8VNT9;F8VV56;F8VWK8;F8W022;P08962;P08962-2;P08962-3	CD63	Isoform of P08962. CD63 antigen (Fragment);Isoform of P08962. CD63 antigen;Isoform of P08962. Tetraspanin (Fragment);Isoform of P08962. Tetraspanin (Fragment);CD63 antigen;Isoform of P08962. Isoform 2 of CD63 antigen;Isoform of P08962. Isoform 3 of CD63 antigen	13.7358	13.6984	12.2445	13.3539	13.3384	13.4066	13.1023	11.9042	13.8377	12.924	13.2142	12.8005	13.4461	14.2302	13.6244	13.4339		0.593721	0.522875	0.340852	1.24023
A6NMH8;E9PIF1;E9PJK1;E9PRJ8;H0YDJ9;H0YDL9;P60033	CD81	Isoform of P60033. Tetraspanin;Isoform of P60033. Tetraspanin;Isoform of P60033. Tetraspanin;Isoform of P60033. Tetraspanin (Fragment);Isoform of P60033. Tetraspanin (Fragment);Isoform of P60033. Tetraspanin (Fragment);CD81 antigen	10.6179	13.3838	11.8481	16.0155	15.7134	16.6544	11.0044	15.4519	16.5635	16.3151	15.2658	16.1619	16.3223	15.2423	16.4976	11.3432		0.647471	0.487216	1.62778	1.33012
P27701;P27701-2	CD82	CD82 antigen;Isoform of P27701. Isoform 2 of CD82 antigen	10.0015	10.8725	13.0349	10.8578	11.0185	13.1675	12.1424	12.4726	12.3343	10.7464	11.8245	12.2692	11.5011	14.387	13.0048	12.2931		0.772425	0.406619	0.599078	1.53409
A6NNI4;G8JLH6;P21926	CD9	Isoform of P21926. Tetraspanin;Isoform of P21926. Tetraspanin (Fragment);CD9 antigen	10.6551	13.4108	13.1971	13.0269	13.4789	11.0814	10.7583	11.728	14.47	13.2522	10.4629	13.3721	14.225	16.1117	12.4177	14.6593		0.857567	0.363988	1.45432	1.67016
Q9NPY3	CD93	Complement component C1q receptor	11.3064	11.4498	11.3004	9.89369	10.2447	10.3292	8.93914	10.3867	11.3795	11.156	9.65592	11.0191	16.2988	11.4265	11.1422	12.0135		0.807196	0.390494	1.28019	1.58989
P14209	CD99	CD99 antigen	15.9402	15.9261	17.3534	15.4301	15.8794	16.0323	15.7847	15.3117	16.1357	15.7281	15.7119	15.5452	16.2035	17.2931	16.6292	15.5735		0.190655	0.823565	0.145279	0.481748
A0A0U1RQT8;Q8TCZ2;Q8TCZ2-2;Q8TCZ2-3;Q8TCZ2-5	CD99L2	Isoform of Q8TCZ2. CD99 antigen-like protein 2 (Fragment);CD99 antigen-like protein 2;Isoform of Q8TCZ2. Isoform 2 of CD99 antigen-like protein 2;Isoform of Q8TCZ2. Isoform 3 of CD99 antigen-like protein 2;Isoform of Q8TCZ2. Isoform 5 of CD99 antigen-like protein 2	15.7959	15.2007	15.6818	15.4546	15.5795	18.2895	15.3607	15.6051	15.2992	15.3527	15.1537	14.835	15.1633	15.6043	15.3219	14.7616		1.21423	0.227193	-0.684475	-2.22898
P49427	CDC34	Ubiquitin-conjugating enzyme E2 R1	11.0527	11.2313	10.4083	8.97222	11.5387	13.8536	10.733	10.682	15.321	13.7452	7.33961	15.4927	14.2334	14.5236	14.8458	14.4945		1.48228	0.164657	2.69048	2.65005
Q16543	CDC37	Hsp90 co-chaperone Cdc37	15.8904	16.1453	16.4711	15.8951	16.3949	16.243	15.8108	16.1259	16.291	16.1556	16.0478	16.5908	16.3675	16.297	16.4332	16.2669		0.692352	0.457927	0.18417	1.40409
B1AL69;Q7L3B6	CDC37L1	Isoform of Q7L3B6. Hsp90 co-chaperone Cdc37-like 1;Hsp90 co-chaperone Cdc37-like 1	10.7093	9.80146	12.4691	14.0967	13.8735	13.8227	13.9316	14.7527	13.1699	14.4024	15.0788	13.8406	14.756	14.1608	11.5808	12.6263		0.404154	0.639329	0.769826	0.907484
P60953	CDC42	Cell division control protein 42 homolog	15.6678	15.5786	16.0982	16.0366	16.3793	16.3271	15.7636	15.7458	16.3659	16.4736	16.3692	16.1647	16.4383	16.5521	16.2752	16.3177		2.2978	0.0523504	0.419959	4.02347
Q99459	CDC5L	Cell division cycle 5-like protein	14.3539	17.2477	18.1201	17.7293	18.1315	17.3972	17.3354	17.139	16.4024	17.0073	16.9924	17.2073	17.7557	16.2173	17.0342	17.3726		0.203816	0.811087	-0.183138	-0.510445
P55290;P55290-4	CDH13	Cadherin-13;Isoform of P55290. Isoform 4 of Cadherin-13	16.7178	16.882	17.0353	16.603	16.8886	16.7359	16.1108	16.5802	16.5611	16.6119	16.305	17.0016	16.7023	17.5677	16.9152	17.0527		0.311211	0.712599	0.145492	0.731183
P55291	CDH15	Cadherin-15	11.1556	12.2665	12.741	12.4054	12.7528	12.9783	12.6974	10.3004	12.7453	12.6447	10.0217	12.1773	12.4945	13.0796	12.606	13.891		0.183965	0.82705	0.295332	0.466996
P33151	CDH5	Cadherin-5	13.6082	14.0654	14.0757	13.2769	13.4149	13.6459	13.1272	14.2048	14.0155	13.2531	13.4905	10.1447	13.16	13.5055	14.0643	13.793		0.554758	0.544329	-0.499062	-1.17405
A0A0D9SEI3;A0A0D9SEN2;A0A0D9SER5;B7ZVY7;J3QR29;J3QR44;P21127;P21127-10;P21127-12;P21127-2;P21127-3;P21127-4;P21127-5;P21127-6;P21127-8;P21127-9;Q5QPR3;Q5QPR4;Q9UQ88;Q9UQ88-10;Q9UQ88-2;Q9UQ88-3;Q9UQ88-4;Q9UQ88-5;Q9UQ88-9	CDK11B;CDK11B;CDK11B;CDK11B;CDK11B;CDK11B;CDK11B;CDK11B;CDK11B;CDK11B;CDK11B;CDK11B;CDK11B;CDK11B;CDK11B;CDK11B;CDK11A;CDK11A;CDK11A;CDK11A;CDK11A;CDK11A;CDK11A;CDK11A;CDK11A	Isoform of P21127. Cyclin-dependent kinase 11B;Isoform of P21127. Cyclin-dependent kinase 11B;Isoform of P21127. Cyclin-dependent kinase 11B;Isoform of P21127. Cell division cycle 2-like 1 (PITSLRE proteins);Isoform of P21127. Cyclin-dependent kinase 11B;Isoform of P21127. Cyclin-dependent kinase 11B;Cyclin-dependent kinase 11B;Isoform of P21127. Isoform SV11 of Cyclin-dependent kinase 11B;Isofor…	14.1608	14.5485	17.0411	15.3561	16.1254	16.2913	14.7465	14.3747	14.6506	14.9374	13.5005	16.2438	16.374	16.064	14.0256	15.5764		0.112452	0.898909	-0.159016	-0.301384
Q96JB5	CDK5RAP3	CDK5 regulatory subunit-associated protein 3	13.6678	11.661	11.0892	15.6672	14.8673	10.3968	9.52333	11.2599	10.6062	10.3592	11.9097	11.3973	10.0726	11.0707	12.8921	14.0293		0.273575	0.74385	-0.724416	-0.656257
P46527	CDKN1B	Cyclin-dependent kinase inhibitor 1B	15.0609	15.5075	15.5859	14.4517	15.467	14.6098	14.5001	13.8836	14.8792	15.0296	14.3421	14.5223	15.0218	15.1824	14.9346	13.8669		0.341802	0.689563	-0.160934	-0.790468
Q49AH0	CDNF	Cerebral dopamine neurotrophic factor	15.1758	15.7722	15.8529	15.2489	15.38	15.5692	15.159	15.5902	15.7208	15.1357	15.3599	15.1056	15.4866	15.8147	15.6727	15.1942		0.0722293	0.927719	-0.0322651	-0.200514
O95674	CDS2	Phosphatidate cytidylyltransferase 2	12.4643	8.96768	11.4951	10.2127	12.005	11.7119	12.0579	12.1925	12.6802	12.0616	12.3975	11.9429	12.7272	12.3328	12.6687	12.6976		1.80495	0.107248	1.05017	3.17176
Q9UKY7	CDV3	Protein CDV3 homolog	15.5424	15.3895	16.2322	16.031	16.236	15.8922	15.8508	15.6309	15.8896	15.5706	15.5739	16.3557	16.2475	17.0057	15.7262	15.7509		0.416994	0.631622	0.164383	0.931019
P49454	CENPF	Centromere protein F	13.9504	14.928	11.0876	10.6945	11.3424	13.7654	11.6341	10.4766	11.311	9.46939	12.325	10.5374	12.2018	15.0647	16.2453	10.3084		0.0168404	0.980567	-0.0520059	-0.0494191
Q7Z7K6	CENPV	Centromere protein V	14.3123	14.5696	14.0027	15.4185	13.4897	14.3461	13.7942	14.0056	14.4851	14.7431	14.0034	13.714	14.1095	14.3597	13.7413	13.9143		0.176001	0.836173	-0.108508	-0.449287
A0A024R6X1;O00748	CES2	Isoform of O00748. Carboxylic ester hydrolase;Cocaine esterase	16.0423	16.2862	15.9087	15.8923	15.6801	16.6703	16.3766	15.5515	16.5102	16.3767	15.7684	16.9662	16.1849	17.0543	16.5528	16.0154		1.67902	0.123003	0.377609	2.96553
P08603	CFH	Complement factor H	16.0916	15.9996	15.7752	16.556	15.915	15.4101	15.3473	15.0267	15.7435	15.4326	15.1989	16.031	15.6886	15.2765	15.8782	15.5782		0.44937	0.610239	-0.161761	-0.989615
B1AKG0;Q03591	CFHR1	Isoform of Q03591. Complement factor H-related protein 1;Complement factor H-related protein 1	12.3944	10.3892	12.0504	11.4254	11.3469	10.969	10.0751	12.4324	12.8404	11.6598	9.87247	9.89797	10.6472	12.7143	12.1296	13.1953		0.166456	0.847058	0.234262	0.427839
E7ETH0;G3XAM2;P05156	CFI	Isoform of P05156. Complement factor I;Isoform of P05156. Complement factor I;Complement factor I	13.1724	13.004	12.8025	13.6993	12.8736	12.5513	12.6989	12.112	12.89	13.0422	11.6807	12.899	12.942	13.1855	12.2173	12.3127		0.501021	0.575606	-0.218067	-1.0811
E9PK25;P23528	CFL1	Isoform of P23528. Cofilin-1;Cofilin-1	18.903	18.8955	18.6066	18.4726	18.544	18.7753	18.8986	18.8045	18.8905	18.594	19.0729	18.4912	18.5824	19.0596	19.1128	18.5894		0.287583	0.733855	0.0615561	0.684419
Q9Y281	CFL2	Cofilin-2	19.1882	19.6126	19.0203	18.6839	19.1704	19.7773	19.358	19.4545	19.33	19.307	19.8149	19.3671	19.5088	19.2492	19.4711	19.4696		0.445456	0.613659	0.156579	0.982586
Q96BP2	CHCHD1	Coiled-coil-helix-coiled-coil-helix domain-containing protein 1	16.0338	16.2276	16.8807	10.6657	9.80866	16.5293	10.0726	16.0489	16.7459	16.2116	16.6142	16.4675	16.2208	16.5551	16.3882	16.5646		1.20366	0.226539	2.43759	2.2125
B5MBW9;Q8WYQ3	CHCHD10	Isoform of Q8WYQ3. Coiled-coil-helix-coiled-coil-helix domain-containing protein 10. mitochondrial;Coiled-coil-helix-coiled-coil-helix domain-containing protein 10. mitochondrial	17.4204	16.4383	15.8533	16.5056	16.1714	17.3763	9.97327	16.6688	16.9069	17.3756	17.4738	16.8646	17.1006	17.3287	17.2373	17.801		0.870712	0.357238	1.46017	1.69102
Q9Y6H1	CHCHD2	Coiled-coil-helix-coiled-coil-helix domain-containing protein 2	18.5665	16.7395	16.7806	17.7153	16.6992	16.9725	16.0953	16.3216	17.0361	17.0244	16.6183	17.1494	16.9465	18.0159	16.3545	18.0576		0.185865	0.827485	0.164015	0.471198
C9JRZ6;Q9NX63	CHCHD3	Isoform of Q9NX63. MICOS complex subunit;MICOS complex subunit MIC19	19.4158	19.1266	19.3223	19.1349	19.0467	19.1978	19.0161	19.4078	19.7316	19.5915	19.1466	19.8033	19.208	19.1894	19.0557	19.6318		1.1984	0.228	0.211262	2.20428
Q8N4Q1;Q8N4Q1-2	CHCHD4	Mitochondrial intermembrane space import and assembly protein 40;Isoform of Q8N4Q1. Isoform 2 of Mitochondrial intermembrane space import and assembly protein 40	15.4682	15.5344	15.538	15.134	15.5929	15.844	14.7856	15.0781	16.222	16.1954	14.9039	15.0815	14.9953	16.4667	15.2517	14.1109		0.0456029	0.952673	0.0315261	0.129873
F8WC14;Q9BSY4;Q9BSY4-2	CHCHD5	Isoform of Q9BSY4. Coiled-coil-helix-coiled-coil-helix domain-containing protein 5;Coiled-coil-helix-coiled-coil-helix domain-containing protein 5;Isoform of Q9BSY4. Isoform 2 of Coiled-coil-helix-coiled-coil-helix domain-containing protein 5	11.179	11.901	11.5667	10.8905	11.5917	12.1893	10.9282	12.2225	13.1775	9.53364	12.8098	9.74971	10.508	14.4396	11.9255	13.2841		0.257459	0.75833	0.369864	0.62343
J3KPV1;Q9BUK0;Q9BUK0-2;Q9BUK0-4	CHCHD7	Isoform of Q9BUK0. Coiled-coil-helix-coiled-coil-helix domain-containing protein 7;Coiled-coil-helix-coiled-coil-helix domain-containing protein 7;Isoform of Q9BUK0. Isoform 2 of Coiled-coil-helix-coiled-coil-helix domain-containing protein 7;Isoform of Q9BUK0. Isoform 4 of Coiled-coil-helix-coiled-coil-helix domain-containing protein 7	14.4611	14.0397	12.0557	10.189	11.091	14.8162	13.8668	14.1753	13.9939	14.8681	13.3466	13.7123	9.6609	14.0641	14.808	14.5383		0.452672	0.607103	0.537181	0.995534
F8VUA2;Q9HD42	CHMP1A	Isoform of Q9HD42. Charged multivesicular body protein 1a;Charged multivesicular body protein 1a	12.3044	12.9754	10.0891	11.4887	10.8493	10.0074	12.2471	12.2519	12.3457	11.7823	12.0458	11.9937	12.3202	13.3587	12.2103	12.3271		0.772586	0.406858	0.771303	1.53435
Q7LBR1	CHMP1B	Charged multivesicular body protein 1b	13.2638	13.077	14.0245	10.3035	14.7609	10.6526	14.3346	9.82746	10.9035	13.8273	13.8192	14.8433	14.6022	14.1798	13.3722	14.918		0.637091	0.49235	1.27763	1.31287
M0R1T5;O43633	CHMP2A	Isoform of O43633. Charged multivesicular body protein 2a (Fragment);Charged multivesicular body protein 2a	15.0258	10.6893	14.3023	13.9721	14.5363	15.2551	14.662	14.8431	15.1244	14.1304	14.615	14.1203	14.6065	14.4193	14.8476	15.11		0.475579	0.592299	0.460958	1.03632
C9J0A7;Q9UQN3;Q9UQN3-2	CHMP2B	Isoform of Q9UQN3. Charged multivesicular body protein 2b;Charged multivesicular body protein 2b;Isoform of Q9UQN3. Isoform 2 of Charged multivesicular body protein 2b	13.0966	12.3166	11.5145	11.9759	12.8837	11.1234	10.8164	9.97587	11.0446	13.3752	10.1157	13.4431	13.5669	14.0887	13.3781	13.3209		0.782046	0.402334	1.07878	1.54956
Q9Y3E7;Q9Y3E7-2;Q9Y3E7-3;Q9Y3E7-4	CHMP3	Charged multivesicular body protein 3;Isoform of Q9Y3E7. Isoform 2 of Charged multivesicular body protein 3;Isoform of Q9Y3E7. Isoform 3 of Charged multivesicular body protein 3;Isoform of Q9Y3E7. Isoform 4 of Charged multivesicular body protein 3	14.2278	13.5809	13.8253	13.6423	14.2637	14.377	13.8575	13.345	13.6312	14.0361	13.3196	13.9882	14.4811	13.683	13.6295	14.0712		0.0656142	0.932841	-0.0349556	-0.183276
Q9BY43;Q9BY43-2	CHMP4A	Charged multivesicular body protein 4a;Isoform of Q9BY43. Isoform 2 of Charged multivesicular body protein 4a	13.0732	13.7305	12.9652	9.49268	10.4811	13.0879	12.073	13.3803	13.1986	15.3899	12.6738	14.2682	13.8436	14.0394	10.7162	13.433		0.821672	0.380252	1.15984	1.61302
Q9H444	CHMP4B	Charged multivesicular body protein 4b	16.8252	17.2591	17.1936	17.0566	17.2232	17.3616	16.7712	16.7272	17.157	17.0398	16.5463	17.3509	17.4771	17.9448	17.1143	17.0741		0.539498	0.556489	0.160842	1.14786
Q9NZZ3	CHMP5	Charged multivesicular body protein 5	11.6764	9.72589	15.7745	15.7634	9.72412	16.046	15.1309	11.2054	15.8983	15.1362	14.7276	15.6172	15.7407	16.4359	15.1649	15.4701		1.3065	0.204631	2.39303	2.37318
I3L4A1;Q96FZ7	CHMP6	Isoform of Q96FZ7. Charged multivesicular body protein 6 (Fragment);Charged multivesicular body protein 6	16.1903	14.2738	13.8803	14.6797	14.9024	16.5647	14.6354	14.4211	16.1875	14.5894	13.573	16.4541	17.1042	13.6788	16.4649	15.0106		0.326468	0.702154	0.439351	0.760921
Q9UHD1	CHORDC1	Cysteine and histidine-rich domain-containing protein 1	9.58066	14.1622	13.6799	14.5322	14.1226	14.055	14.0085	14.0219	13.5196	13.7383	8.47823	14.1042	13.7473	14.015	13.1118	13.6768		0.218966	0.798229	-0.471479	-0.542978
Q99653	CHP1	Calcineurin B homologous protein 1	15.3382	16.47	16.3175	14.814	16.1662	15.0652	14.6117	14.6933	14.9284	15.8528	14.6677	15.9175	16.0143	16.1061	14.8157	15.8335		0.0858437	0.916148	0.0825177	0.235386
A0A087X1B7;Q9Y3Y2;Q9Y3Y2-3;Q9Y3Y2-4;X6R700	CHTOP	Isoform of Q9Y3Y2. Chromatin target of PRMT1 protein;Chromatin target of PRMT1 protein;Isoform of Q9Y3Y2. Isoform 2 of Chromatin target of PRMT1 protein;Isoform of Q9Y3Y2. Isoform 3 of Chromatin target of PRMT1 protein;Isoform of Q9Y3Y2. Chromatin target of PRMT1 protein	14.2113	14.2602	15.1365	14.6127	14.8354	14.814	14.6384	13.4479	14.3784	14.4618	14.4537	14.5046	14.5894	14.4732	14.3478	14.4128		0.0869898	0.915626	-0.0418155	-0.238286
O76071	CIAO1	Probable cytosolic iron-sulfur protein assembly protein CIAO1	12.945	12.1378	12.7007	12.5064	12.8683	12.9312	12.2588	12.4948	13.0646	12.5049	12.3596	11.9415	13.0471	13.1757	12.9093	9.7778		0.287501	0.733613	-0.257807	-0.684254
Q6FI81;Q6FI81-3	CIAPIN1	Anamorsin;Isoform of Q6FI81. Isoform 3 of Anamorsin	14.2938	14.3953	14.1433	14.0402	14.1049	14.1829	14.2988	14.3974	15.2542	14.3929	14.2958	14.9927	15.1653	15.1407	14.6582	15.0877	+	2.48175	0.04372	0.641357	4.36403
O75339	CILP	Cartilage intermediate layer protein 1	12.3972	11.927	9.91404	12.4932	12.6434	12.6643	11.2658	12.9512	12.0359	12.1384	12.151	12.2274	12.5665	12.8191	13.1775	12.8099		0.613219	0.507318	0.45871	1.27302
Q14011	CIRBP	Cold-inducible RNA-binding protein	15.9448	16.4249	16.3332	16.2388	16.2763	16.2104	16.2521	16.0733	15.9048	15.8793	16.1378	15.8967	16.1643	16.9263	16.4175	15.8156		0.229163	0.786576	-0.0764446	-0.564587
Q9NZ45	CISD1	CDGSH iron-sulfur domain-containing protein 1	18.4848	18.0674	18.0107	17.5521	17.7112	18.3581	17.9138	18.226	18.6571	18.4542	18.2223	17.9612	18.0512	17.8926	18.4818	18.4785		1.15808	0.242768	0.234348	2.1414
Q8N5K1	CISD2	CDGSH iron-sulfur domain-containing protein 2	15.9963	15.0954	14.8167	10.0056	15.1453	12.8744	14.5378	14.4105	14.7769	15.2274	14.9566	14.3328	15.5156	16.2093	15.3247	15.1206		0.850303	0.367149	1.07272	1.65862
Q07065	CKAP4	Cytoskeleton-associated protein 4	13.4144	12.4044	13.8724	13.2822	14.2316	13.7741	13.2784	12.9852	13.8601	12.3752	13.2751	12.4067	14.4206	15.2026	13.7987	13.8435		0.408045	0.636895	0.24248	0.914635
P12277	CKB	Creatine kinase B-type	26.8122	26.7353	26.9738	27.4119	27.1064	25.805	25.791	25.6702	25.9084	26.93	25.7414	26.527	26.9204	25.3953	25.613	26.7536		0.576957	0.532118	-0.314556	-1.21187
P06732	CKM	Creatine kinase M-type	27.4282	26.8515	27.7418	27.5933	27.5937	27.0445	26.8376	27.1388	27.3532	26.7048	26.8829	27.3323	27.3994	26.9271	27.0604	27.2114		0.756515	0.413324	-0.169738	-1.50843
P17540	CKMT2	Creatine kinase S-type. mitochondrial	23.8658	23.383	24.2359	24.2208	22.4072	23.5983	24.0361	23.8017	24.3142	24.2544	24.1242	23.9164	23.8298	23.7003	23.9698	24.1103		0.841378	0.369203	0.333841	1.64443
F8WA11;Q7Z460;Q7Z460-2;Q7Z460-3;Q7Z460-4;Q7Z460-5	CLASP1	Isoform of Q7Z460. CLIP-associating protein 1;CLIP-associating protein 1;Isoform of Q7Z460. Isoform 2 of CLIP-associating protein 1;Isoform of Q7Z460. Isoform 3 of CLIP-associating protein 1;Isoform of Q7Z460. Isoform 4 of CLIP-associating protein 1;Isoform of Q7Z460. Isoform 5 of CLIP-associating protein 1	11.4808	11.2773	11.4295	10.472	10.7795	10.6091	9.7907	10.2226	11.5531	12.2914	11.0211	10.079	11.158	11.6331	10.1662	11.5822		0.956711	0.317353	0.427837	1.82668
A0A0U1RQI6;E3W994;E7ERI8;E7EW49;J3KR49;O75122;O75122-3	CLASP2	Isoform of O75122. CLIP-associating protein 2;Isoform of O75122. CLIP-associating protein 2;Isoform of O75122. CLIP-associating protein 2;Isoform of O75122. CLIP-associating protein 2;Isoform of O75122. CLIP-associating protein 2;CLIP-associating protein 2;Isoform of O75122. Isoform 3 of CLIP-associating protein 2	13.0505	10.9185	12.1746	10.2465	12.735	10.5312	12.2012	11.055	12.2223	12.9749	10.9408	12.8658	11.9633	13.8639	12.15	12.3914		0.629964	0.493763	0.807495	1.30101
Q96S66;Q96S66-2;Q96S66-3;Q96S66-4	CLCC1	Chloride channel CLIC-like protein 1;Isoform of Q96S66. Isoform 2 of Chloride channel CLIC-like protein 1;Isoform of Q96S66. Isoform 3 of Chloride channel CLIC-like protein 1;Isoform of Q96S66. Isoform 4 of Chloride channel CLIC-like protein 1	11.8437	11.7224	12.5975	12.4269	12.7431	12.1113	12.2366	14.5108	12.1595	12.2225	11.6628	12.1915	12.3615	12.5123	11.8537	12.1547		0.548866	0.548843	-0.384224	-1.16396
E9PHK0;P05452	CLEC3B	Isoform of P05452. Tetranectin;Tetranectin	14.509	13.7717	14.8701	14.6936	15.2402	14.1623	13.6166	13.3585	14.2655	13.647	13.2291	14.4514	13.9768	14.4858	14.0485	14.0636		0.393583	0.646224	-0.256795	-0.887973
O00299	CLIC1	Chloride intracellular channel protein 1	16.2636	15.8457	15.7289	16.0177	15.8674	15.7732	15.3766	15.8042	16.2627	15.6946	15.8297	16.2094	15.6756	16.1024	15.8416	15.776		0.512875	0.56824	0.0893342	1.10179
Q9Y696	CLIC4	Chloride intracellular channel protein 4	14.3841	14.5854	14.2777	14.28	14.4149	13.9466	13.9221	14.2194	14.806	14.4317	14.3414	14.4041	14.9043	15.1644	14.6733	14.3668		1.3605	0.19448	0.382713	2.45787
Q9NZA1;Q9NZA1-2	CLIC5	Chloride intracellular channel protein 5;Isoform of Q9NZA1. Isoform 1 of Chloride intracellular channel protein 5	16.5501	16.4977	16.3992	16.5053	16.7108	16.466	16.6699	16.3608	16.4632	16.5401	16.3105	16.1889	16.5621	15.9518	16.2108	16.117		1.89235	0.0890732	-0.22693	-3.31727
Q14677	CLINT1	Clathrin interactor 1	14.0335	12.4904	14.1886	15.5735	13.109	14.3672	14.2432	13.8325	13.5593	13.8662	12.7171	15.6169	14.0273	14.6956	13.7038	14.1353		0.0687132	0.930617	0.0604613	0.191376
P30622	CLIP1	CAP-Gly domain-containing linker protein 1	15.982	16.1282	16.3665	16.1783	16.487	16.0123	15.7559	15.2068	15.6554	15.5828	15.5556	15.7936	16.0375	16.0882	15.6439	15.2093		1.72328	0.119344	-0.318817	-3.03758
E9PMI6;J3KN38;P54105	CLNS1A	Isoform of P54105. Methylosome subunit pICln;Isoform of P54105. Methylosome subunit pICln;Methylosome subunit pICln	14.8862	16.29	17.3832	16.0302	16.8367	15.9031	14.7064	13.2561	15.1989	15.2584	14.6149	15.8226	16.0968	16.1972	13.1665	14.9265		0.485875	0.586425	-0.501275	-1.05451
M0R208;Q16740	CLPP	Isoform of Q16740. ATP-dependent Clp protease proteolytic subunit;ATP-dependent Clp protease proteolytic subunit. mitochondrial	13.9539	10.8612	16.266	13.7507	13.9781	15.2424	13.0145	12.6984	15.3671	15.4823	14.3957	14.3281	14.3737	15.358	16.0299	15.4669		1.01683	0.28969	1.37958	1.92092
K7EQQ1;O96005;O96005-4	CLPTM1	Isoform of O96005. Cleft lip and palate transmembrane protein 1 (Fragment);Cleft lip and palate transmembrane protein 1;Isoform of O96005. Isoform 3 of Cleft lip and palate transmembrane protein 1	10.6655	10.5942	10.8527	10.2706	9.89274	10.5749	13.5828	10.1295	13.4445	13.2386	13.1049	9.51842	13.7036	14.6332	14.8726	15.6445		2.30191	0.0522059	2.69966	4.03093
O76031	CLPX	ATP-dependent Clp protease ATP-binding subunit clpX-like. mitochondrial	11.3034	10.7433	11.9201	10.7298	10.5994	10.339	10.0452	10.6641	10.888	11.9584	11.1006	11.9265	10.4192	9.90557	10.3522	9.71697		0.010916	0.984635	-0.00959957	-0.0322432
P09497;P09497-2	CLTB	Clathrin light chain B;Isoform of P09497. Isoform Non-brain of Clathrin light chain B	15.2275	15.5705	15.594	15.139	15.7147	15.7695	15.2859	15.1507	15.998	15.526	15.2087	15.7869	15.8526	16.793	15.6102	15.5442		1.20739	0.226266	0.358473	2.21831
A0A087WVQ6;Q00610;Q00610-2	CLTC	Isoform of Q00610. Clathrin heavy chain;Clathrin heavy chain 1;Isoform of Q00610. Isoform 2 of Clathrin heavy chain 1	15.515	15.2601	15.4463	15.2766	15.4304	15.0825	15.0056	15.1886	15.6662	15.3869	15.4887	15.5578	15.6226	15.3996	15.6424	15.4691		2.27347	0.0547324	0.253507	3.97946
P10909;P10909-2;P10909-4;P10909-5	CLU	Clusterin;Isoform of P10909. Isoform 2 of Clusterin;Isoform of P10909. Isoform 4 of Clusterin;Isoform of P10909. Isoform 5 of Clusterin	17.0707	17.1827	16.5036	17.0205	16.6621	16.5848	16.1497	16.3698	16.5044	16.422	16.5078	16.4249	16.6699	17.4489	16.9965	16.6592		0.0170728	0.980641	0.0112011	0.0500885
I3L2B0	CLUH	Isoform of O75153. Clustered mitochondria protein homolog (Fragment)	14.0416	14.4548	14.2754	9.86233	10.8584	14.2473	14.0339	10.7219	9.64127	14.5116	9.47932	13.8688	11.7574	10.0787	14.3986	14.5842		0.159886	0.850295	-0.52196	-0.412931
K7EIG1	CLUH	Isoform of O75153. Clustered mitochondria protein homolog (Fragment)	12.9347	13.2368	12.6936	12.0643	12.5771	12.4683	12.5624	12.7667	13.1658	13.2794	12.8204	12.744	13.0808	12.606	12.7293	13.5249		1.93604	0.0843103	0.330855	3.39081
Q8N0X4	CLYBL	Citramalyl-CoA lyase. mitochondrial	15.1036	14.6476	14.1358	12.7276	14.7934	14.2377	10.8872	12.7018	15.954	15.1139	14.637	14.098	15.2543	14.0458	10.1875	12.947		0.874083	0.355733	0.37534	1.69636
P23946;P23946-2	CMA1	Chymase;Isoform of P23946. Isoform 2 of Chymase	16.8139	14.4201	14.9979	13.9262	9.9875	12.9517	13.4509	14.6853	10.698	10.5224	14.3777	14.3643	20.6581	11.1677	14.5333	13.3329		0.0391923	0.959345	-0.197396	-0.112338
Q8NFW8	CMAS	N-acylneuraminate cytidylyltransferase	13.7721	12.2514	11.5028	9.51	14.3385	11.1496	10.9049	13.2825	12.2889	13.762	12.81	10.7519	11.2522	12.652	13.4729	10.5186		0.0450816	0.952939	0.0996027	0.128455
Q96DG6	CMBL	Carboxymethylenebutenolidase homolog	18.3578	18.6149	19.3224	19.3663	19.1608	18.9307	18.5103	18.5516	18.6408	18.7548	18.1307	19.4155	18.8464	17.9752	18.2443	18.7155		0.662411	0.479045	-0.261422	-1.35484
Q7Z7K0	CMC1	COX assembly mitochondrial protein homolog	17.2581	16.9356	17.415	17.0437	17.0086	17.2192	16.9333	17.0079	17.0556	16.8178	17.5134	17.9629	16.6968	17.4553	16.4633	17.347		0.150941	0.860613	0.0613413	0.392432
H3BPP2;Q9NRP2	CMC2	Isoform of Q9NRP2. COX assembly mitochondrial protein;COX assembly mitochondrial protein 2 homolog	11.0571	15.6315	10.3226	10.4372	15.9963	11.2894	16.1573	11.2566	17.1601	16.7864	15.5417	12.6845	15.6211	17.4968	10.2025	17.1512		0.876199	0.355029	2.56206	1.69971
P56277	CMC4	Cx9C motif-containing protein 4	10.5911	10.2641	10.2691	16.4319	10.0897	9.86074	12.3173	10.63	11.1383	16.7164	16.1992	15.6561	10.3421	16.1871	9.85774	16.5249		1.13389	0.250287	2.77097	2.1037
P30085	CMPK1	UMP-CMP kinase	16.0653	15.6502	16.1695	16.2292	16.1211	16.2759	16.0844	16.1833	16.4473	16.1608	16.1099	16.4296	16.373	16.9785	16.4209	16.4604		2.34224	0.0511811	0.325174	4.10448
Q5EBM0;Q5EBM0-2;Q5EBM0-3;Q5EBM0-4	CMPK2	UMP-CMP kinase 2. mitochondrial;Isoform of Q5EBM0. Isoform 2 of UMP-CMP kinase 2. mitochondrial;Isoform of Q5EBM0. Isoform 3 of UMP-CMP kinase 2. mitochondrial;Isoform of Q5EBM0. Isoform 4 of UMP-CMP kinase 2. mitochondrial	15.7268	10.2287	15.2194	15.0558	15.2105	15.2111	15.7224	15.6635	15.8411	14.9847	14.8374	16.0528	15.2336	15.8382	16.0444	16.1719		0.761474	0.412118	0.870731	1.51644
Q8N3K9	CMYA5	Cardiomyopathy-associated protein 5	15.0943	14.5734	14.45	14.5764	14.5445	14.6001	14.0316	14.7616	15.2173	14.8432	14.9053	14.713	14.8777	15.1264	14.596	14.8963	+	2.78533	0.0332121	0.317889	4.95905
P62633;P62633-2	CNBP	Cellular nucleic acid-binding protein;Isoform of P62633. Isoform 2 of Cellular nucleic acid-binding protein	15.57	16.5506	16.8653	16.4916	16.8344	16.8466	16.5059	15.7056	16.4334	16.4707	16.3809	16.7214	16.8052	16.8214	15.6309	16.3146		0.046476	0.952656	0.0260421	0.132244
P62633-4;P62633-8	CNBP	Isoform of P62633. Isoform 4 of Cellular nucleic acid-binding protein;Isoform of P62633. Isoform 8 of Cellular nucleic acid-binding protein	14.8619	14.3411	15.4651	15.4276	15.4135	15.5417	15.369	15.1579	14.9771	15.2136	14.8593	15.0896	15.1842	15.2844	14.5459	14.7145		0.549444	0.54882	-0.213638	-1.16495
Q96KP4	CNDP2	Cytosolic non-specific dipeptidase	15.7282	16.1488	15.9028	15.7123	16.1756	16.0122	15.6542	15.2648	15.7641	15.8373	15.2617	15.8187	15.9648	15.9973	15.6807	15.4829		0.461648	0.601521	-0.098895	-1.01157
A6NLH6;Q9P003	CNIH4	Isoform of Q9P003. Protein cornichon homolog 4;Protein cornichon homolog 4	16.3128	16.2878	14.7629	15.1968	15.0778	9.6088	14.8076	16.7046	14.4535	14.1372	10.114	14.1968	14.1958	10.3681	16.2098	11.6545		1.10966	0.257707	-1.67868	-2.06589
P51911	CNN1	Calponin-1	14.2371	14.1099	13.9562	13.545	14.6391	15.024	15.6176	13.3667	15.2187	14.5433	14.1371	15.4279	14.7922	14.3559	15.2717	13.3192		0.531417	0.557723	0.321279	1.13393
Q15417;Q15417-3	CNN3	Calponin-3;Isoform of Q15417. Isoform 3 of Calponin-3	14.5885	14.665	12.3791	13.8222	14.3045	10.4305	12.872	14.998	13.3739	12.4276	12.2906	9.10881	14.1864	13.9784	13.354	13.1975		0.404306	0.639745	-0.767819	-0.907764
B8ZZB8;Q96F85;Q96F85-2	CNRIP1	Isoform of Q96F85. CB1 cannabinoid receptor-interacting protein 1;CB1 cannabinoid receptor-interacting protein 1;Isoform of Q96F85. Isoform 2 of CB1 cannabinoid receptor-interacting protein 1	14.1738	9.93068	10.6432	10.9951	10.737	14.1289	13.768	13.4635	14.1115	11.1445	13.5107	10.5677	14.9812	13.3839	13.8948	14.032		0.801844	0.392068	0.973251	1.58132
Q6PJW8	CNST	Consortin	10.3571	13.1652	12.2265	11.3414	12.7893	12.3342	9.7891	12.0345	12.6604	12.4799	10.1902	12.3479	12.5048	10.2598	12.1079	13.0561		0.118989	0.89254	0.196225	0.317198
Q9NXG0;Q9NXG0-2	CNTLN	Centlein;Isoform of Q9NXG0. Isoform 2 of Centlein	14.1333	12.636	14.5524	14.7342	15.4803	15.4541	14.611	14.6023	15.0934	10.8605	14.0698	14.2369	15.447	15.55	14.3521	15.219		0.240604	0.777127	-0.171879	-0.588571
Q9Y2R0	COA3	Cytochrome c oxidase assembly factor 3 homolog. mitochondrial	13.9025	14.283	13.3258	10.4593	12.9438	13.6008	13.6019	13.8785	15.5571	14.1193	14.7215	14.1157	14.2286	14.1211	14.7377	14.2466		1.71411	0.120477	1.23151	3.02262
Q9NYJ1;Q9NYJ1-2	COA4	Cytochrome c oxidase assembly factor 4 homolog. mitochondrial;Isoform of Q9NYJ1. Isoform 2 of Cytochrome c oxidase assembly factor 4 homolog. mitochondrial	17.1111	17.0637	17.3194	17.2695	16.7818	17.3567	16.6115	16.7351	17.5047	16.9616	17.0897	17.2961	17.0991	17.8256	16.49	17.0517		0.689546	0.460623	0.133727	1.39949
B9A057;Q86WW8	COA5	Isoform of Q86WW8. Cytochrome c oxidase assembly factor 5;Cytochrome c oxidase assembly factor 5	11.1441	10.6629	12.6844	11.9424	12.6712	9.79564	9.18831	10.8138	11.8524	12.9355	10.1823	12.5025	12.373	12.0617	11.4721	11.7437		0.656626	0.483334	0.777564	1.34528
Q5JTJ3;Q5JTJ3-2;Q5JTJ3-3;X6R5Z6	COA6	Cytochrome c oxidase assembly factor 6 homolog;Isoform of Q5JTJ3. Isoform 2 of Cytochrome c oxidase assembly factor 6 homolog;Isoform of Q5JTJ3. Isoform 3 of Cytochrome c oxidase assembly factor 6 homolog;Isoform of Q5JTJ3. Cytochrome c oxidase assembly factor 6 homolog	17.8877	17.8328	18.5924	17.777	17.9389	18.4225	17.6038	17.8801	18.6287	18.3647	17.5047	18.3396	18.3236	18.7084	17.5332	18.3584		0.516207	0.566518	0.228252	1.10758
Q96BR5	COA7	Cytochrome c oxidase assembly factor 7	13.0031	12.4967	12.318	12.912	12.7401	13.169	12.9282	13.2598	17.7819	13.4772	13.0792	12.6983	13.3105	18.8424	13.2345	13.7253		1.1345	0.250185	1.66532	2.10464
Q13057;Q13057-2	COASY	Bifunctional coenzyme A synthase;Isoform of Q13057. Isoform 2 of Bifunctional coenzyme A synthase	14.1198	13.9321	14.3925	14.03	14.4132	14.4713	13.991	14.2242	14.3598	14.0277	13.9942	14.2125	14.3488	13.8849	14.5563	14.2613		0.0238224	0.977246	0.00892687	0.0693844
A0A0J9YWK3	COBL	Isoform of O75128. Protein cordon-bleu	14.9194	14.7816	15.0997	14.9835	15.5108	14.7293	14.666	15.0339	15.2404	15.2505	15.0256	14.466	15.5163	15.1929	15.15	14.6648		0.293499	0.730262	0.0978054	0.696212
Q05707;Q05707-2	COL14A1	Collagen alpha-1(XIV) chain;Isoform of Q05707. Isoform 2 of Collagen alpha-1(XIV) chain	13.2753	9.79446	11.3172	10.8734	15.4109	10.89	10.5416	10.0573	13.6668	12.3914	9.89926	10.7697	10.1687	14.8692	13.6492	12.0822		0.261509	0.754616	0.667016	0.631724
A0A087X0K0;P39059	COL15A1	Isoform of P39059. Collagen alpha-1(XV) chain;Collagen alpha-1(XV) chain	16.5573	16.3395	16.2338	16.2694	16.2558	16.0638	16.0233	15.9387	16.1909	16.1606	16.0726	16.2984	16.4233	16.3354	17.0142	16.507		0.483922	0.587882	0.165098	1.05106
P39060;P39060-1;P39060-2	COL18A1	Collagen alpha-1(XVIII) chain;Isoform of P39060. Isoform 2 of Collagen alpha-1(XVIII) chain;Isoform of P39060. Isoform 3 of Collagen alpha-1(XVIII) chain	15.4886	15.0471	16.1055	15.7535	16.0264	15.424	15.5071	15.7645	15.9281	15.5998	15.8006	16.0782	15.8143	15.3585	16.4962	16.0946		0.864212	0.359571	0.2567	1.68071
P02452	COL1A1	Collagen alpha-1(I) chain	21.0712	20.211	20.1906	20.1595	20.4458	20.0602	20.3432	20.2519	20.9801	20.3401	20.1752	20.573	20.4494	22.702	21.4338	20.4844		0.865582	0.359423	0.550572	1.68288
A0A087WTA8;P08123	COL1A2	Isoform of P08123. Collagen alpha-2(I) chain;Collagen alpha-2(I) chain	19.4656	18.4695	18.4657	18.4816	18.9057	18.6247	18.6785	18.6684	19.4035	18.6888	18.8644	19.0631	19.0435	21.1626	19.9254	19.1924		1.29168	0.21018	0.698007	2.34999
P02461	COL3A1	Collagen alpha-1(III) chain	17.969	18.3306	17.694	17.6795	17.982	17.9849	18.0004	18.0414	18.1132	17.3971	18.0113	17.652	17.6838	19.4033	18.7549	18.0109		0.284498	0.734834	0.168068	0.678246
P02462;P02462-2	COL4A1	Collagen alpha-1(IV) chain;Isoform of P02462. Isoform 2 of Collagen alpha-1(IV) chain	13.7097	13.9104	14.7366	14.552	14.6527	14.7067	14.7045	14.0689	14.2312	14.3874	13.8595	14.4662	14.3325	14.5912	14.6993	14.4074		0.0174038	0.980941	-0.00837064	-0.0510414
P08572	COL4A2	Collagen alpha-2(IV) chain	16.8155	16.1215	15.9475	15.6513	16.1306	16.5354	15.8128	15.7299	15.8895	15.5193	15.3042	16.1435	15.9666	17.0412	15.9493	15.5914		0.395849	0.64564	-0.167436	-0.892166
Q9Y5P4;Q9Y5P4-2;Q9Y5P4-3	COL4A3BP	Collagen type IV alpha-3-binding protein;Isoform of Q9Y5P4. Isoform 2 of Collagen type IV alpha-3-binding protein;Isoform of Q9Y5P4. Isoform 3 of Collagen type IV alpha-3-binding protein	12.2203	10.3048	10.9777	10.1385	10.2142	12.5406	11.9302	12.1712	12.222	12.2757	12.4031	10.8261	14.5459	12.3088	12.6155	12.3893		1.17426	0.236918	1.13612	2.16664
A0A087WXW9;P20908	COL5A1	Isoform of P20908. Collagen alpha-1(V) chain;Collagen alpha-1(V) chain	15.1896	14.5395	15.2076	14.6864	15.541	14.4738	14.156	14.7242	14.9613	14.374	14.7383	15.4686	15.3948	16.1632	15.3478	15.1737		0.699357	0.454361	0.387931	1.41556
P05997	COL5A2	Collagen alpha-2(V) chain	16.0554	15.4441	16.314	15.4378	16.1779	15.5091	15.8185	16.3793	16.082	15.3958	15.3837	16.1001	15.8471	17.1517	16.5245	16.0896		0.264864	0.750691	0.17978	0.638573
A0A087X0S5;P12109	COL6A1	Isoform of P12109. Collagen alpha-1(VI) chain;Collagen alpha-1(VI) chain	16.3525	16.3157	16.311	16.4794	16.1619	16.4689	16.3065	16.5541	16.0068	16.2007	16.2094	16.174	15.8247	16.5961	16.6167	16.1601		0.827021	0.376575	-0.145198	-1.62156
P12110	COL6A2	Collagen alpha-2(VI) chain	18.0556	18.4126	17.9308	17.9186	17.8616	17.8172	17.6872	18.3527	17.5473	17.7255	17.8441	17.6132	17.1822	18.427	18.3367	17.6097		0.506322	0.572205	-0.218827	-1.09036
C9JNG9	COL6A3	Isoform of P12111. Collagen alpha-3(VI) chain (Fragment)	9.36053	14.4022	10.8212	11.0402	14.4483	10.2631	9.00616	10.851	10.5683	14.631	14.9977	14.4727	14.3011	15.2128	15.9234	14.6774		2.02544	0.075068	3.07398	3.54307
P12111;P12111-2	COL6A3	Collagen alpha-3(VI) chain;Isoform of P12111. Isoform 2 of Collagen alpha-3(VI) chain	18.2439	18.0827	17.7235	17.7882	18.0253	17.6877	17.8716	18.231	17.7108	17.6329	17.9702	17.4196	17.3017	17.9523	18.2866	17.5943		0.680346	0.467481	-0.223207	-1.38439
Q9UBI1	COMMD3	COMM domain-containing protein 3	12.8453	11.6252	12.6931	12.9099	12.7305	11.972	12.5339	15.6485	15.6306	12.9305	13.3616	12.7328	12.9827	13.1252	12.2467	13.0413		0.296084	0.728697	0.386626	0.701347
Q9P000	COMMD9	COMM domain-containing protein 9	11.4402	11.4911	13.3947	10.2388	13.0639	14.387	13.6561	9.26324	12.6862	10.2847	10.819	10.722	15.6982	12.7325	12.4767	11.7767		0.0159174	0.981215	0.0326188	0.0467577
P21964;P21964-2	COMT	Catechol O-methyltransferase;Isoform of P21964. Isoform Soluble of Catechol O-methyltransferase	15.7017	15.871	16.1512	15.3634	15.8311	15.8386	15.5945	15.4796	16.3205	15.42	15.615	15.3429	15.4454	15.9174	15.3492	15.035		0.609499	0.510021	-0.173217	-1.26678
Q86VU5;R4GNF4	COMTD1	Catechol O-methyltransferase domain-containing protein 1;Isoform of Q86VU5. Catechol O-methyltransferase domain-containing protein 1 (Fragment)	11.2375	11.2618	10.0503	11.7922	10.2951	10.5657	15.0986	15.4676	15.6704	14.1258	15.1225	13.5337	12.7338	14.6409	13.863	15.1804		1.70822	0.121921	2.3877	3.01302
P53621;P53621-2	COPA	Coatomer subunit alpha;Isoform of P53621. Isoform 2 of Coatomer subunit alpha	12.2592	12.5944	13.1518	12.5066	16.4249	16.7891	14.0201	16.0521	16.1405	12.8408	15.7171	13.3974	13.1403	13.4147	16.5781	13.1754		0.0252869	0.977537	0.0757648	0.0735352
P53618	COPB1	Coatomer subunit beta	10.7921	10.7982	12.5949	12.1639	12.3702	11.7542	13.1421	12.7388	13.2394	12.332	12.6058	14.9898	12.4572	12.9472	13.113	12.5188		1.26573	0.215467	0.981106	2.3094
P35606;P35606-2	COPB2	Coatomer subunit beta';Isoform of P35606. Isoform 2 of Coatomer subunit beta'	10.9021	10.4813	16.0985	11.4603	16.2264	11.4108	14.5861	10.7445	13.3147	16.9805	11.4601	16.3879	11.6945	12.2123	12.1086	12.168		0.143822	0.86633	0.552081	0.37595
M0QXB4;O14579;O14579-2	COPE	Isoform of O14579. Coatomer protein complex. subunit epsilon. isoform CRA_g;Coatomer subunit epsilon;Isoform of O14579. Isoform 2 of Coatomer subunit epsilon	12.7073	12.1537	13.7798	10.0129	10.3869	12.1622	11.7454	13.0076	9.9122	13.6416	14.2665	13.3993	13.4251	10.769	14.4428	14.4754		0.660961	0.48044	1.04703	1.35244
H9KV77;J3QRX6;Q9NQ92	COPRS	Isoform of Q9NQ92. Coordinator of PRMT5 and differentiation stimulator;Isoform of Q9NQ92. Coordinator of PRMT5 and differentiation stimulator (Fragment);Coordinator of PRMT5 and differentiation stimulator	13.5666	14.2114	11.0224	13.0647	10.7918	11.3041	10.9913	11.9455	14.6993	14.405	13.7552	14.8699	10.3623	15.4594	13.9832	10.6741		1.16763	0.239009	1.41384	2.15631
P61201;P61201-2	COPS2	COP9 signalosome complex subunit 2;Isoform of P61201. Isoform 2 of COP9 signalosome complex subunit 2	14.6986	14.3855	13.4452	14.6533	14.9818	14.6784	14.5422	14.5129	14.675	14.7515	14.4915	14.6167	14.6272	12.459	14.7051	14.811		0.10497	0.905457	-0.095142	-0.2831
Q9UNS2	COPS3	COP9 signalosome complex subunit 3	14.6645	15.5586	14.7831	15.083	15.4096	15.2893	15.414	14.0414	14.9743	14.093	14.4147	15.2445	15.4605	15.433	14.8456	14.6923		0.238213	0.778397	-0.135707	-0.583582
Q9BT78	COPS4	COP9 signalosome complex subunit 4	15.7372	15.6245	15.4474	15.3317	15.3793	15.336	15.4123	15.5084	15.4913	15.4194	15.356	15.3955	15.3048	14.9676	15.5405	15.2988		1.16163	0.240833	-0.125349	-2.14695
Q92905	COPS5	COP9 signalosome complex subunit 5	15.5674	15.4874	15.534	15.2181	15.6847	15.5016	15.3774	15.497	15.4236	15.302	15.1153	15.1027	15.3043	15.0427	15.4779	15.4618		1.65049	0.12897	-0.204656	-2.91931
E7EM64;Q7L5N1	COPS6	Isoform of Q7L5N1. COP9 signalosome complex subunit 6;COP9 signalosome complex subunit 6	13.5193	13.4126	13.5187	15.7629	13.4463	13.276	13.4213	13.4461	13.6414	13.4791	13.5906	12.7539	13.3122	13.3818	12.8945	13.0657		0.588436	0.52713	-0.460512	-1.23131
Q9UBW8	COPS7A	COP9 signalosome complex subunit 7a	14.3895	14.3033	15.6695	14.0241	15.098	15.4306	14.0374	13.9986	14.4764	15.4549	14.4851	14.6493	14.4393	15.8828	14.1054	15.267		0.325578	0.702952	0.226176	0.759195
E9PGT6;Q99627;Q99627-2	COPS8	Isoform of Q99627. COP9 signalosome complex subunit 8;COP9 signalosome complex subunit 8;Isoform of Q99627. Isoform 2 of COP9 signalosome complex subunit 8	16.8203	16.7905	16.6433	16.5502	16.6911	16.5766	16.3713	15.9821	16.582	16.2997	16.1628	16.3132	16.493	16.7149	16.2372	16.2073		1.03485	0.280613	-0.176913	-1.9491
F8VUC5;F8VVA7;F8VXB1;F8VYZ4;F8W156;F8W651;P61923;P61923-5	COPZ1	Isoform of P61923. Coatomer subunit zeta-1;Isoform of P61923. Coatomer subunit zeta-1;Isoform of P61923. Coatomer subunit zeta-1 (Fragment);Isoform of P61923. Coatomer subunit zeta-1;Isoform of P61923. Coatomer subunit zeta-1;Isoform of P61923. Coatomer subunit zeta-1;Coatomer subunit zeta-1;Isoform of P61923. Isoform 5 of Coatomer subunit zeta-1	9.9473	12.1699	13.0024	9.32303	13.3172	11.0318	14.9876	13.7693	14.8115	14.6527	13.3865	13.1383	13.9536	14.6438	14.2607	14.2629		1.53097	0.152939	1.94518	2.72747
Q9P299	COPZ2	Coatomer subunit zeta-2	11.8742	9.78023	11.5935	10.1522	11.4645	12.4825	12.1849	11.2623	12.4091	11.5227	10.5257	10.8341	12.4034	12.5635	11.9993	11.3129		0.555007	0.544278	0.347028	1.17447
Q96MF6;Q96MF6-2;Q96MF6-3	COQ10A	Coenzyme Q-binding protein COQ10 homolog A. mitochondrial;Isoform of Q96MF6. Isoform 2 of Coenzyme Q-binding protein COQ10 homolog A. mitochondrial;Isoform of Q96MF6. Isoform 3 of Coenzyme Q-binding protein COQ10 homolog A. mitochondrial	16.8102	16.2917	16.5527	16.1615	15.588	16.731	16.3908	16.5256	16.7383	16.3036	16.6121	16.1556	16.0727	15.7752	16.2613	16.4329		0.254932	0.761208	-0.0874926	-0.618239
Q9NZJ6	COQ3	Ubiquinone biosynthesis O-methyltransferase. mitochondrial	17.0881	16.7489	16.6964	16.5927	16.6961	17.4131	15.9727	16.7481	17.1193	16.2692	16.6786	16.1739	16.5117	16.4043	16.7119	16.7494		0.420687	0.627804	-0.167247	-0.937756
Q5HYK3	COQ5	2-methoxy-6-polyprenyl-1.4-benzoquinol methylase. mitochondrial	15.9358	15.7882	15.8119	15.4841	15.3199	15.7369	15.3851	15.8577	16.1299	15.7191	15.9699	16.2524	15.2308	15.3153	15.5689	15.495		0.128364	0.882529	0.0452081	0.339616
Q9Y2Z9;Q9Y2Z9-3	COQ6	Ubiquinone biosynthesis monooxygenase COQ6. mitochondrial;Isoform of Q9Y2Z9. Isoform 3 of Ubiquinone biosynthesis monooxygenase COQ6. mitochondrial	14.222	13.5807	14.1595	13.6364	13.347	13.9219	13.1251	14.069	14.172	14.1376	13.676	14.2177	14.0674	13.6343	13.8165	13.9379		0.546084	0.551448	0.199705	1.15918
H3BP28;Q99807	COQ7	Isoform of Q99807. 5-demethoxyubiquinone hydroxylase. mitochondrial;5-demethoxyubiquinone hydroxylase. mitochondrial	15.2563	14.8161	15.2236	14.9482	14.816	14.8209	14.9996	15.3219	15.2428	15.3504	15.5253	15.4249	15.1539	15.0909	15.4148	15.4937	+	2.81855	0.0319365	0.31173	5.0269
Q8NI60	COQ8A	Atypical kinase COQ8A. mitochondrial	20.0249	19.6616	19.8901	19.2883	19.565	19.92	19.2079	19.6483	19.5466	19.2816	19.3811	19.4908	18.8887	19.4625	19.2852	18.8256		1.73837	0.116463	-0.380486	-3.06226
O75208	COQ9	Ubiquinone biosynthesis protein COQ9. mitochondrial	19.1348	19.2754	19.3767	19.2529	19.1011	19.3328	18.9671	19.1122	19.1941	19.1878	19.0378	19.1251	18.8696	19.0362	19.1267	19.2073		0.722477	0.438604	-0.0960519	-1.45327
P31146	CORO1A	Coronin-1A	14.5613	14.127	13.5901	14.6636	13.6798	14.2418	14.1146	13.4618	14.683	13.3453	14.4429	13.8999	14.0481	14.6297	14.7284	14.6056		0.444285	0.613049	0.242856	0.980479
Q9BR76	CORO1B	Coronin-1B	10.7029	12.275	9.45867	11.3206	10.4131	11.316	10.1678	10.5382	10.9915	11.9961	9.72005	11.7394	8.83787	13.404	13.7989	13.1339		0.778355	0.403982	0.928682	1.54363
Q9ULV4;Q9ULV4-2;Q9ULV4-3	CORO1C	Coronin-1C;Isoform of Q9ULV4. Isoform 2 of Coronin-1C;Isoform of Q9ULV4. Isoform 3 of Coronin-1C	13.0943	13.5074	12.4229	12.599	13.3451	13.4468	13.1012	12.7327	13.5568	13.1312	13.1249	13.2041	13.918	13.7035	13.7684	13.567		1.97525	0.0790135	0.465599	3.45728
J3KSS5	CORO6	Isoform of Q6QEF8. Coronin	15.1529	15.1992	15.3271	15.0187	15.4836	15.1227	15.1116	14.9958	14.8583	14.9611	14.1217	14.3334	15.0638	14.5639	14.7008	14.9744		2.17879	0.0649057	-0.479277	-3.8103
Q6QEF8-5	CORO6	Isoform of Q6QEF8. Isoform 5 of Coronin-6	15.9101	15.9954	15.8454	14.8257	16.3524	16.3041	16.0188	15.9791	15.9117	15.9506	15.7799	15.4097	16.0871	16.0093	16.1529	16.3717		0.204468	0.81099	0.0552423	0.511857
A0A0A6YYL4;I3L0X9;I3L1U7;I3L3T0;P57737-3;Q9Y3D7	CORO7-PAM16;PAM16;PAM16;PAM16;CORO7;PAM16	Isoform of Q9Y3D7. Coronin;Isoform of Q9Y3D7. Mitochondrial import inner membrane translocase subunit TIM16;Isoform of Q9Y3D7. Mitochondrial import inner membrane translocase subunit TIM16;Isoform of Q9Y3D7. HCG15164. isoform CRA_b;Isoform of P57737. Isoform 3 of Coronin-7;Mitochondrial import inner membrane translocase subunit TIM16	13.8868	13.4683	11.2355	11.5607	11.0144	11.7858	10.6337	12.8875	13.7298	13.1656	12.9018	14.5761	12.6078	13.329	13.5474	13.1952		1.65012	0.1288	1.32253	2.91872
C9J8T6;Q14061	COX17	Isoform of Q14061. Cytochrome c oxidase copper chaperone;Cytochrome c oxidase copper chaperone	18.1739	18.572	18.2701	18.5994	18.019	18.4753	17.6028	19.6485	18.7896	18.2134	18.6279	18.8977	18.4449	19.3756	18.2653	18.3055		0.327334	0.702851	0.194835	0.762597
Q49B96	COX19	Cytochrome c oxidase assembly protein COX19	14.7292	15.6916	12.1839	15.5808	11.6424	15.9197	15.4401	12.7901	15.1759	15.4015	15.0401	15.3885	15.1792	15.4831	14.4592	15.1428		0.743608	0.424249	0.91154	1.48756
Q5RI15;Q5RI15-2	COX20	Cytochrome c oxidase protein 20 homolog;Isoform of Q5RI15. Isoform 2 of Cytochrome c oxidase protein 20 homolog	14.8083	14.6333	13.814	10.6297	13.5003	11.7397	14.0013	13.8229	14.1735	13.8779	14.0397	13.5585	13.2276	10.2361	14.4816	12.8606		0.0448481	0.95291	-0.0617361	-0.127819
P13073	COX4I1	Cytochrome c oxidase subunit 4 isoform 1. mitochondrial	20.6611	20.5423	20.3702	20.2464	20.0519	20.7207	20.313	20.726	21.3943	20.7338	20.9057	20.906	20.5388	20.5283	21.0492	21.4031	+	2.37454	0.0479675	0.47844	4.16384
P20674	COX5A	Cytochrome c oxidase subunit 5A. mitochondrial	22.046	21.9979	22.2253	21.9152	21.9004	22.5221	21.7054	22.0588	22.896	22.5566	22.214	22.6725	22.788	23.4037	22.5668	22.8585	+	3.45625	0.0197333	0.698113	6.45159
P10606	COX5B	Cytochrome c oxidase subunit 5B. mitochondrial	22.9238	22.8089	22.6124	22.592	22.4443	22.8685	22.5343	22.897	23.3412	23.3688	22.9068	23.31	23.2499	23.2704	23.0524	23.4667	+	4.3709	0.022	0.535629	9.00285
Q02221	COX6A2	Cytochrome c oxidase subunit 6A2. mitochondrial	17.6773	17.9847	17.8937	17.2959	17.5275	17.7763	17.7007	17.8032	18.2314	18.1614	17.1285	18.1774	17.348	16.9345	17.6062	17.5721		0.110778	0.899571	-0.0624762	-0.297312
P14854	COX6B1	Cytochrome c oxidase subunit 6B1	22.5256	22.4744	22.6094	22.3747	22.203	22.7272	22.1206	22.4796	23.1241	22.9082	22.3916	23.1422	22.8787	23.2516	22.527	22.9237	+	2.4426	0.0462804	0.454084	4.29036
P09669	COX6C	Cytochrome c oxidase subunit 6C	18.4899	18.1413	18.9279	18.6215	18.3618	19.2514	18.9555	18.657	18.7785	19.7079	17.7615	19.6304	19.3792	17.0969	18.488	20.2365		0.169463	0.842043	0.209053	0.434623
P24310	COX7A1	Cytochrome c oxidase subunit 7A1. mitochondrial	20.8434	20.4321	20.1195	18.9541	19.684	19.2256	18.8682	19.6586	20.2839	19.8551	19.6386	20.5503	18.8866	19.082	19.5761	19.2573		0.105024	0.905687	-0.0819659	-0.283233
D6RGV5;D6RIE3;H0UI06;P14406	COX7A2	Isoform of P14406. Cytochrome c oxidase subunit 7A2. mitochondrial (Fragment);Isoform of P14406. Cytochrome c oxidase subunit 7A2. mitochondrial;Isoform of P14406. Cytochrome c oxidase subunit 7A2. mitochondrial;Cytochrome c oxidase subunit 7A2. mitochondrial	17.7712	18.3287	17.8427	16.6686	17.0606	18.2201	18.0745	17.4532	18.4143	17.6687	17.6253	17.779	16.9859	16.9845	17.4344	17.4698		0.198569	0.814822	-0.132235	-0.499055
E5RJZ1;H0YBD2;O14548	COX7A2L	Isoform of O14548. Cytochrome c oxidase subunit 7A-related protein. mitochondrial;Isoform of O14548. Cytochrome c oxidase subunit 7A-related protein. mitochondrial (Fragment);Cytochrome c oxidase subunit 7A-related protein. mitochondrial	14.6008	13.9409	14.707	10.2318	9.44878	14.8144	13.3612	10.8058	14.5263	10.4577	14.2591	14.3783	14.7423	13.8792	14.2753	13.8418		0.468697	0.596761	1.05615	1.02412
D6R9Z7;P15954	COX7C	Isoform of P15954. Cytochrome c oxidase subunit 7C. mitochondrial;Cytochrome c oxidase subunit 7C. mitochondrial	19.6805	19.3725	18.7599	19.1898	18.352	19.4277	19.2613	18.5505	20.2992	19.9587	20.3284	19.2788	19.6578	19.6154	19.9369	19.9558		2.32417	0.0522154	0.804618	4.07145
P10176;U3KQK5	COX8A;	Cytochrome c oxidase subunit 8A. mitochondrial;Uncharacterized protein	19.1102	16.5722	18.2152	18.1203	16.058	18.3813	15.9808	15.3915	19.0664	19.3894	19.8388	17.8613	18.5077	16.4813	18.5418	17.1053		0.99613	0.300334	1.12032	1.88852
P00450	CP	Ceruloplasmin	17.0059	16.8616	16.546	17.2493	16.6371	16.5528	16.4926	15.8727	16.5587	16.2264	16.1556	16.761	16.3566	16.6019	16.9391	16.3451		0.481597	0.589185	-0.159219	-1.04696
P15088	CPA3	Mast cell carboxypeptidase A	15.701	15.2385	15.848	15.3826	15.5779	16.1135	15.7572	15.7051	15.1346	14.7261	15.6516	15.55	15.1513	15.8516	15.9921	15.4538		1.17917	0.234407	-0.226582	-2.17429
Q8NE35;Q8NE35-2	CPEB3	Cytoplasmic polyadenylation element-binding protein 3;Isoform of Q8NE35. Isoform 2 of Cytoplasmic polyadenylation element-binding protein 3	13.0879	13.1139	15.8374	12.2228	13.6743	13.3238	13.2861	13.1334	13.4624	13.4817	12.8901	13.673	13.6659	14.3277	12.8387	13.1257		0.0195833	0.980863	-0.026818	-0.0572976
B0QZ18;F2Z2V0;Q99829	CPNE1	Isoform of Q99829. Copine-1;Isoform of Q99829. Copine-1 (Fragment);Copine-1	13.6089	11.6476	13.33	12.7559	12.9617	13.6963	12.2437	13.9839	13.7099	11.3343	13.239	13.5568	13.061	13.4861	13.3967	13.1548		0.154033	0.857122	0.0887947	0.399545
O75131	CPNE3	Copine-3	13.9875	14.275	14.1933	14.1074	14.3151	14.2986	14.4978	14.4104	14.6874	14.4196	14.4666	14.2017	14.5233	14.4261	14.4418	14.812		1.64511	0.128814	0.236649	2.91061
P36551	CPOX	Oxygen-dependent coproporphyrinogen-III oxidase. mitochondrial	13.3074	9.52506	13.0542	12.2294	13.9722	13.8281	13.2454	13.1445	13.6974	13.5736	13.4798	13.1458	13.6751	13.9643	13.8017	12.926		0.758476	0.413248	0.744684	1.5116
Q9BRF8	CPPED1	Serine/threonine-protein phosphatase CPPED1	15.5426	16.0882	15.0647	14.8434	15.499	15.4748	15.2647	15.1746	15.6409	15.4855	14.3036	14.4193	15.3331	15.643	15.0043	15.1919		1.08742	0.265525	-0.241286	-2.0312
F8WJN3;Q16630;Q16630-2;Q16630-3	CPSF6	Isoform of Q16630. Cleavage and polyadenylation-specificity factor subunit 6;Cleavage and polyadenylation specificity factor subunit 6;Isoform of Q16630. Isoform 2 of Cleavage and polyadenylation specificity factor subunit 6;Isoform of Q16630. Isoform 3 of Cleavage and polyadenylation specificity factor subunit 6	12.4592	9.84789	10.7029	11.0668	10.1609	12.0649	10.1203	10.4089	10.2186	10.5757	11.4993	10.2205	10.5697	11.1113	11.8285	10.6694		0.0133142	0.984192	-0.0173526	-0.0392227
Q92523	CPT1B	Carnitine O-palmitoyltransferase 1. muscle isoform	16.6723	16.3177	15.8795	15.0873	14.4495	16.5062	16.1521	16.5157	17.0948	16.5153	16.9456	16.4091	16.0679	16.1877	16.6594	16.7563		1.5496	0.148571	0.631967	2.75719
P23786	CPT2	Carnitine O-palmitoyltransferase 2. mitochondrial	14.6775	15.0444	15.0456	14.0875	14.096	15.0249	14.7315	15.0963	14.6579	14.8968	14.8886	14.6753	14.1712	14.3507	14.9854	14.9187		0.0917101	0.912785	-0.0324142	-0.250174
Q9H3G5	CPVL	Probable serine carboxypeptidase CPVL	13.8801	11.1777	11.1385	9.40955	11.0754	11.5114	11.0878	9.73642	13.9411	12.8023	10.7596	11.0993	12.2029	11.0224	12.8748	10.87		1.35618	0.195518	0.819427	2.45108
P78560	CRADD	Death domain-containing protein CRADD	13.1138	10.815	13.2794	13.0696	12.8556	12.9381	13.0015	11.5143	12.6722	14.4138	13.4457	13.008	15.4273	12.6434	13.3396	12.6304		0.864989	0.35953	0.874125	1.68194
P43155;P43155-2	CRAT	Carnitine O-acetyltransferase;Isoform of P43155. Isoform 2 of Carnitine O-acetyltransferase	17.6881	17.3371	17.6117	17.1485	17.0111	18.1089	17.2679	17.808	18.1395	17.9014	17.7832	18.3055	17.681	17.4247	18.1345	18.0866		1.21451	0.22731	0.434394	2.22943
P16220;P16220-2;P16220-3	CREB1	Cyclic AMP-responsive element-binding protein 1;Isoform of P16220. Isoform CREB-B of Cyclic AMP-responsive element-binding protein 1;Isoform of P16220. Isoform 3 of Cyclic AMP-responsive element-binding protein 1	13.122	11.0624	13.4867	13.4432	13.8022	12.012	10.3561	10.0537	11.4169	13.4556	10.3319	9.15754	13.4365	13.7579	10.0975	11.1774		0.283256	0.735424	-0.563402	-0.675755
F8WBY3;Q96HD1;Q96HD1-2	CRELD1	Isoform of Q96HD1. Cysteine-rich with EGF-like domain protein 1;Cysteine-rich with EGF-like domain protein 1;Isoform of Q96HD1. Isoform 2 of Cysteine-rich with EGF-like domain protein 1	10.6236	11.6548	14.1968	10.1547	10.296	11.8286	11.8099	9.33576	13.5907	13.8779	13.7635	10.0918	13.8992	14.1878	13.385	9.90193		1.76758	0.112971	1.59973	3.11016
P52943;P52943-2	CRIP2	Cysteine-rich protein 2;Isoform of P52943. Isoform 2 of Cysteine-rich protein 2	14.9969	14.5229	14.8668	14.2028	14.8008	14.7712	14.5035	14.6625	15.0513	14.6153	14.72	14.9754	14.6783	15.3082	14.9175	14.3164		0.545514	0.551562	0.156893	1.1582
P46108	CRK	Adapter molecule crk	15.1981	10.4329	11.7971	16.3988	16.43	16.0445	16.1253	16.0062	16.4064	15.0499	15.8886	14.4224	15.6726	16.512	15.0817	15.9976		0.442689	0.614464	0.824806	0.977608
P46109	CRKL	Crk-like protein	15.6458	15.6846	15.5794	16.1201	15.6044	15.444	15.3804	15.4553	15.5452	15.8773	15.379	15.3395	15.933	15.5565	15.7369	15.4767		0.0230369	0.978839	-0.00871992	-0.0671529
Q5TZA2	CROCC	Rootletin	15.8839	17.2339	17.5217	15.0567	18.8267	17.3188	17.2536	16.9446	16.8282	17.156	16.8563	17.6576	17.6384	17.779	17.3994	17.1612		0.324585	0.703986	0.304515	0.757269
E9PR44;P02511	CRYAB	Isoform of P02511. Alpha-crystallin B chain (Fragment);Alpha-crystallin B chain	21.6954	21.9623	21.8617	22.142	22.1746	22.3258	22.0453	22.2059	21.9597	22.3526	22.3123	22.1281	22.2294	22.6211	22.8216	22.1711		1.5896	0.141989	0.272867	2.82123
A0A0J9YWL0	CRYBG1	Isoform of Q9Y4K1. Beta/gamma crystallin domain-containing protein 1	22.403	23.5407	24.4111	23.3138	24.4732	24.7218	24.2723	24.3351	23.5727	22.1707	23.1608	24.6123	25.0347	16.2071	25.008	25.2219		0.294621	0.730455	-0.810355	-0.698442
Q08257	CRYZ	Quinone oxidoreductase	14.7565	14.4839	15.1566	14.6784	14.9336	14.2129	14.6891	14.6767	15.5842	15.3874	15.2959	15.5643	15.3995	13.4622	15.1238	15.5826		1.29935	0.20696	0.476515	2.36199
B4DJV2;O75390	CS	Isoform of O75390. Citrate synthase;Citrate synthase. mitochondrial	21.3939	21.1547	21.551	21.0547	20.6305	21.3673	20.6549	21.165	21.7154	21.5366	21.0615	21.8173	21.2218	20.967	21.434	21.7363		0.936657	0.326357	0.314727	1.79515
O75534;O75534-4	CSDE1	Cold shock domain-containing protein E1;Isoform of O75534. Isoform 4 of Cold shock domain-containing protein E1	14.6833	14.2896	14.4818	14.4376	14.8531	14.7916	14.3758	14.4632	14.5476	14.6178	14.3012	14.6229	13.6517	16.1592	14.3133	14.8397		0.126068	0.885725	0.0846658	0.334153
P55060;P55060-3	CSE1L	Exportin-2;Isoform of P55060. Isoform 3 of Exportin-2	14.9345	14.5869	14.6859	14.7373	15.0122	14.785	14.83	14.7022	14.7705	14.817	14.4866	14.4252	14.9025	14.5603	15.0286	14.8876		0.266	0.751246	-0.0494766	-0.640886
E7EU96;P68400;Q8NEV1	CSNK2A1;CSNK2A1;CSNK2A3	Isoform of P68400. Casein kinase II subunit alpha;Casein kinase II subunit alpha;Casein kinase II subunit alpha 3	13.4953	13.3801	13.5809	13.4326	13.6163	13.6156	13.3072	13.4141	13.9695	14.3874	13.4528	13.7393	13.8643	13.2358	13.6726	14.3289		1.14237	0.246886	0.351052	2.1169
A0A0G2JM12;N0E472;P67870;Q5SRQ3;Q5SRQ6	CSNK2B;CSNK2B-LY6G5B--991;CSNK2B;CSNK2B;CSNK2B	Isoform of P67870. Casein kinase II subunit beta;Isoform of P67870. Casein kinase II subunit beta;Casein kinase II subunit beta;Isoform of P67870. Casein kinase II subunit beta;Isoform of P67870. Casein kinase II subunit beta	14.3271	14.2959	13.6528	11.3551	11.6701	14.0645	13.9959	13.7776	14.1574	12.7626	13.9927	10.2183	13.6305	11.2539	14.4135	13.6262		0.324226	0.703189	-0.385493	-0.756572
Q6UVK1	CSPG4	Chondroitin sulfate proteoglycan 4	20.3261	9.13174	20.4708	13.4902	19.2642	11.2764	19.9051	11.8026	12.3123	11.5021	12.0119	19.0116	19.263	12.3728	10.6619	13.0216		0.431151	0.618603	-1.93872	-0.95677
E9PP21;P21291	CSRP1	Isoform of P21291. Cysteine and glycine-rich protein 1;Cysteine and glycine-rich protein 1	15.3134	15.8744	15.6327	12.2865	15.5216	15.2091	15.9437	14.7969	15.4904	15.4171	15.0966	16.3368	15.2223	15.0174	15.4245	12.9587		0.0273235	0.974122	0.0481927	0.0792866
P50461	CSRP3	Cysteine and glycine-rich protein 3	19.9168	20.922	20.5923	20.2696	20.7202	20.5579	20.6864	20.8201	19.5123	20.8905	20.5197	20.277	20.687	20.4433	20.4246	20.1733		1.32506	0.200164	-0.194683	-2.40227
P01034	CST3	Cystatin-C	13.8949	14.0313	14.3591	13.5022	14.2734	14.4216	13.7385	13.5054	13.958	14.3194	13.7182	14.1084	15.2965	14.2762	13.9562	14.4863		0.75121	0.417395	0.299103	1.49986
P04080	CSTB	Cystatin-B	18.7174	18.0537	18.2596	18.21	17.7245	18.3698	17.7231	18.067	18.5696	17.5606	18.3241	18.2374	17.6373	18.3575	17.9379	17.4369		0.633743	0.492701	-0.132961	-1.3073
G3V599;O15320;O15320-10;O15320-2;O15320-3;O15320-4;O15320-7;O15320-8;Q96PC5	CTAGE5;CTAGE5;CTAGE5;CTAGE5;CTAGE5;CTAGE5;CTAGE5;CTAGE5;MIA2	Isoform of O15320. Endoplasmic reticulum export factor CTAGE5;Endoplasmic reticulum export factor CTAGE5;Isoform of O15320. Isoform 11 of Endoplasmic reticulum export factor CTAGE5;Isoform of O15320. Isoform MEA11 of Endoplasmic reticulum export factor CTAGE5;Isoform of O15320. Isoform 5A of Endoplasmic reticulum export factor CTAGE5;Isoform of O15320. Isoform 5B of Endoplasmic reticulum export f…	12.1129	12.8025	12.2001	10.1645	15.9442	13.2095	14.0889	11.0691	13.6458	14.2859	12.2874	12.097	14.4287	11.8674	12.5719	12.3657		0.180546	0.829799	0.244749	0.459415
Q13363	CTBP1	C-terminal-binding protein 1	15.7546	14.3293	13.5402	13.7628	14.2721	13.633	13.113	14.8849	15.2091	14.2298	14.7474	14.3293	13.8867	14.5069	14.737	14.4432		0.563556	0.540011	0.349965	1.18908
P35221	CTNNA1	Catenin alpha-1	13.3482	12.9884	14.3377	15.636	13.6109	13.1202	12.7046	12.9784	13.5719	13.3176	13.1354	13.2416	13.3714	13.2456	13.0668	13.2169		0.410196	0.635712	-0.319641	-0.91858
P26232;P26232-2;P26232-5	CTNNA2	Catenin alpha-2;Isoform of P26232. Isoform 2 of Catenin alpha-2;Isoform of P26232. Isoform 5 of Catenin alpha-2	10.0871	12.2137	11.9182	11.6819	12.0271	10.6466	10.0428	11.4325	12.0844	12.0307	11.0008	12.1607	12.2712	11.7812	11.7583	12.2197		1.01727	0.289782	0.657112	1.92161
B4DGU4;P35222	CTNNB1	Isoform of P35222. Catenin beta-1;Catenin beta-1	12.9765	11.1954	12.1772	12.3115	11.9382	13.108	12.2123	12.2783	12.8754	12.6618	12.2838	11.652	12.7596	12.6783	12.3995	12.9654		0.48289	0.588818	0.259812	1.04924
Q9NSA3	CTNNBIP1	Beta-catenin-interacting protein 1	15.3578	14.1457	14.459	14.0265	14.3201	14.0335	13.9383	14.5463	14.5408	13.6992	14.5294	14.1108	14.3685	14.7912	14.5555	14.6391		0.10456	0.905303	0.0509143	0.282092
C9JZR2;O60716;O60716-10;O60716-11;O60716-13;O60716-17;O60716-18;O60716-19;O60716-2;O60716-21;O60716-3;O60716-5;O60716-9	CTNND1	Isoform of O60716. Catenin delta-1;Catenin delta-1;Isoform of O60716. Isoform 2AB of Catenin delta-1;Isoform of O60716. Isoform 2AC of Catenin delta-1;Isoform of O60716. Isoform 2A of Catenin delta-1;Isoform of O60716. Isoform 3ABC of Catenin delta-1;Isoform of O60716. Isoform 3AB of Catenin delta-1;Isoform of O60716. Isoform 3AC of Catenin delta-1;Isoform of O60716. Isoform 1AB of Catenin delta-…	11.6452	17.0704	13.8104	13.0423	10.1635	14.9291	12.4709	12.5343	13.1153	12.974	14.6671	12.6574	12.6498	12.9963	12.447	11.8808		0.15088	0.86033	-0.28482	-0.392292
P07858	CTSB	Cathepsin B	15.1157	16.1841	14.5198	14.2285	16.1796	15.0579	15.4835	14.7428	16.0298	15.1459	15.4982	12.7384	15.9011	15.6749	15.7625	15.9708		0.167092	0.846244	0.151257	0.429277
A0A1B0GV23;A0A1B0GVD5;A0A1B0GW44;A0A1B0GWE8;P07339	CTSD	Isoform of P07339. Cathepsin D;Isoform of P07339. Cathepsin D;Isoform of P07339. Cathepsin D;Isoform of P07339. Cathepsin D;Cathepsin D	16.7803	16.4706	16.7733	15.9549	16.428	16.5848	16.2932	16.2196	16.6	16.3061	16.3214	16.3311	16.412	17.0952	16.4628	15.7835		0.0690127	0.930211	-0.0240924	-0.192156
P08311	CTSG	Cathepsin G	14.0092	13.2811	13.862	13.8622	13.902	13.7026	13.0357	13.3566	14.0416	13.1578	13.1441	13.2502	14.177	13.7212	14.3201	13.6443		0.0930883	0.912969	0.0555896	0.253628
Q9UBR2	CTSZ	Cathepsin Z	13.2632	13.286	13.1908	13.0331	12.7976	10.1698	10.2889	9.35023	10.7059	13.1418	9.93314	13.3443	13.5103	11.0222	13.081	10.3343		0.0187673	0.980336	-0.0383426	-0.0549588
Q14247	CTTN	Src substrate cortactin	15.265	14.6573	14.7351	14.3336	15.4297	14.6529	14.875	15.2784	14.9316	14.5344	15.0712	14.8046	15.7929	15.7856	15.4125	14.7751		0.600513	0.519842	0.235122	1.25168
Q9H467	CUEDC2	CUE domain-containing protein 2	12.8986	12.7759	11.882	12.7733	10.1734	10.7894	13.1568	12.8722	13.6427	13.5489	12.8601	13.3456	13.2175	13.3211	12.5024	12.9096		1.27144	0.215161	1.0033	2.31834
A0A0C4DGX4;Q13616	CUL1	Isoform of Q13616. Cullin-1;Cullin-1	15.187	11.1892	19.3677	20.2554	18.6169	18.6625	19.7189	13.5019	18.9585	17.4889	18.5555	18.5133	18.826	18.8917	18.2151	17.6011		0.596468	0.522302	1.31882	1.24486
A0A0A0MTN0;Q13617;Q13617-2	CUL2	Isoform of Q13617. Cullin-2;Cullin-2;Isoform of Q13617. Isoform 2 of Cullin-2	13.2723	12.8985	13.3237	13.3377	13.432	13.4034	13.4497	13.0537	13.233	13.3932	13.0143	13.8049	13.4275	12.7591	13.6192	13.2043		0.0972544	0.909497	0.0355755	0.264024
Q13618;Q13618-2	CUL3	Cullin-3;Isoform of Q13618. Isoform 2 of Cullin-3	12.9251	12.2676	13.2902	12.7652	13.1131	13.6746	13.1901	13.2181	13.2709	13.0786	13.0151	13.4238	13.3909	13.642	13.5097	13.5244		1.36812	0.191908	0.30142	2.46984
Q13619	CUL4A	Cullin-4A	13.0957	12.1609	12.7725	12.8658	14.2642	12.8486	12.6741	13.4083	13.2763	13.1031	13.0931	11.6563	12.7944	13.2736	13.5798	12.8427		0.0646326	0.934174	-0.0588492	-0.180701
Q93034	CUL5	Cullin-5	13.3372	13.2727	13.4218	13.2193	13.2633	12.7723	13.3458	13.3876	13.3252	13.5547	13.5517	13.1981	13.4887	12.7423	13.0519	13.9889		0.550264	0.547927	0.110155	1.16635
O60888;O60888-2;O60888-3	CUTA	Protein CutA;Isoform of O60888. Isoform A of Protein CutA;Isoform of O60888. Isoform C of Protein CutA	17.7901	18.0889	17.7748	17.4005	18.3032	17.6779	17.7218	17.364	17.5235	17.7974	17.2758	17.501	17.7062	18.1781	17.606	17.2708		0.620343	0.500966	-0.157806	-1.28494
Q9NTM9	CUTC	Copper homeostasis protein cutC homolog	16.2157	16.0024	15.9268	15.8404	15.9857	15.8737	15.5155	15.7243	15.7083	15.6144	15.5236	15.449	15.317	16.3966	15.3193	15.3856		1.28789	0.210996	-0.29635	-2.34407
P00167;P00167-2	CYB5A	Cytochrome b5;Isoform of P00167. Isoform 2 of Cytochrome b5	14.3512	14.565	14.7669	14.8357	14.9219	14.7398	14.5444	14.5395	14.8773	14.3674	14.2133	15.1584	14.8914	14.8189	14.7028	14.5483		0.128229	0.882458	0.0391749	0.339296
J3KNF8	CYB5B	Isoform of O43169. Cytochrome b5 type B	17.0882	17.0419	16.9888	16.9289	16.7805	17.1933	16.7889	17.0576	17.2288	17.0782	16.9213	16.7251	16.7233	17.3214	17.1376	16.7003		0.0176949	0.980629	-0.00401855	-0.0518786
Q9UHQ9	CYB5R1	NADH-cytochrome b5 reductase 1	18.8935	18.5858	19.4334	18.5428	19.107	19.6049	19.011	19.1456	19.0555	18.6823	18.9474	19.155	19.2185	19.118	19.1422	19.3157		0.112486	0.899216	0.0388517	0.301469
P00387;P00387-2;P00387-3	CYB5R3	NADH-cytochrome b5 reductase 3;Isoform of P00387. Isoform 2 of NADH-cytochrome b5 reductase 3;Isoform of P00387. Isoform 3 of NADH-cytochrome b5 reductase 3	16.7194	16.4001	16.9587	16.608	16.8273	16.7282	16.4153	16.203	16.5761	16.6418	16.4704	16.8398	16.8031	16.5124	16.5891	16.712		0.119729	0.891498	0.0355983	0.318978
P04839	CYBB	Cytochrome b-245 heavy chain	10.2611	10.082	11.4366	10.424	11.3182	11.0107	9.17164	12.1751	11.2311	10.4731	10.8212	10.4369	11.6747	11.3448	11.4379	9.5669		0.104484	0.904853	0.138397	0.281904
Q53TN4;Q53TN4-3	CYBRD1	Cytochrome b reductase 1;Isoform of Q53TN4. Isoform 3 of Cytochrome b reductase 1	13.4617	12.7487	13.8098	12.8613	13.0557	13.3656	12.5867	11.406	13.1853	12.9131	12.9611	12.9088	13.1751	13.4333	13.4002	12.9246		0.34888	0.684931	0.200722	0.803997
P08574	CYC1	Cytochrome c1. heme protein. mitochondrial	18.805	18.5036	18.2477	18.3016	17.8613	18.3978	18.4231	18.8161	19.1276	18.8598	19.001	18.8504	18.4827	18.4752	18.8074	19.1583	+	3.15916	0.0204651	0.425756	5.75734
C9JFR7;P99999	CYCS	Isoform of P99999. Cytochrome c (Fragment);Cytochrome c	19.9933	19.7288	20.1255	19.8972	19.83	20.2715	19.6396	20.0196	20.5607	20.4458	20.0554	20.4521	20.11	19.8362	19.8571	20.4998		1.15336	0.243837	0.288948	2.13405
Q7L576	CYFIP1	Cytoplasmic FMR1-interacting protein 1	10.8519	10.6568	10.4444	10.6482	11.9488	10.9411	9.54422	10.3909	11.8242	11.192	11.2021	11.9795	11.756	11.6896	12.5243	10.0411		1.27743	0.214212	0.847795	2.32771
Q15438;Q15438-2	CYTH1	Cytohesin-1;Isoform of Q15438. Isoform 2 of Cytohesin-1	13.9692	13.8944	17.3019	14.1082	14.5286	13.3775	14.056	13.6041	13.2249	17.2709	13.7862	14.4288	14.1041	14.1864	9.21064	13.9133		0.270436	0.747599	-0.589325	-0.649901
Q8N465	D2HGDH	D-2-hydroxyglutarate dehydrogenase. mitochondrial	11.6649	11.612	13.4217	13.2013	13.2603	14.781	14.4512	10.0394	11.941	11.571	10.6354	12.063	9.41187	15.1378	11.8977	9.69645		1.209	0.227082	-1.25972	-2.22082
A0A0B4J239;F5GXX5;F5H895;P61803	DAD1	Isoform of P61803. Dolichyl-diphosphooligosaccharide--protein glycosyltransferase subunit DAD1;Isoform of P61803. Dolichyl-diphosphooligosaccharide--protein glycosyltransferase subunit DAD1;Isoform of P61803. Dolichyl-diphosphooligosaccharide--protein glycosyltransferase subunit DAD1;Dolichyl-diphosphooligosaccharide--protein glycosyltransferase subunit DAD1	10.1289	13.9469	14.7302	14.386	15.4117	15.155	14.8313	14.3694	14.7246	14.4086	14.888	14.7843	13.3636	14.6162	14.6736	14.9014		0.264563	0.750896	0.425093	0.637958
Q14118	DAG1	Dystroglycan	16.4158	16.8698	16.9627	16.5497	16.9034	17.0332	16.4641	16.1703	16.4544	16.5636	15.7641	16.8147	16.7879	17.6794	16.8038	16.3877		0.0245695	0.977551	-0.014153	-0.0715034
P51398;P51398-2;P51398-3	DAP3	28S ribosomal protein S29. mitochondrial;Isoform of P51398. Isoform 2 of 28S ribosomal protein S29. mitochondrial;Isoform of P51398. Isoform 3 of 28S ribosomal protein S29. mitochondrial	13.0746	10.8033	11.5466	12.2506	10.7031	10.9034	10.9546	13.553	13.6176	11.8736	13.2684	11.9337	13.1183	12.9058	13.6063	13.42		1.76255	0.11347	1.2443	3.1019
P14868	DARS	Aspartate--tRNA ligase. cytoplasmic	15.0836	14.207	14.041	13.9257	14.0837	13.8465	14.5893	14.6209	14.4839	14.144	14.3479	14.3391	14.4761	14.4933	14.264	14.8361		0.363533	0.669298	0.123347	0.831797
Q6PI48	DARS2	Aspartate--tRNA ligase. mitochondrial	13.4314	16.5689	13.1504	13.3059	13.1719	14.0312	12.6494	13.4477	14.1463	13.5146	12.9756	13.938	13.6642	13.3508	13.1266	13.9991		0.107325	0.903335	-0.130174	-0.288877
P07108	DBI	Acyl-CoA-binding protein	21.146	21.0618	21.4284	21.1651	21.1588	21.4169	20.7765	20.6758	21.1887	20.6954	19.7325	21.4521	20.8506	21.3017	20.1038	20.6521		0.840159	0.369081	-0.356549	-1.64249
Q16643;Q16643-3	DBN1	Drebrin;Isoform of Q16643. Isoform 3 of Drebrin	10.5012	13.8329	13.8546	12.682	13.7234	12.7347	13.9369	14.6038	14.1051	13.6536	13.2837	13.8149	13.8575	15.0001	14.0443	13.6121		0.598696	0.521984	0.687759	1.24862
B4DDD6	DBNL	Isoform of Q9UJU6. Drebrin-like protein	10.8423	10.7657	11.7566	11.5583	11.9727	11.8758	11.6261	11.2324	11.559	11.6554	10.7914	11.9209	11.7863	13.267	12.3751	11.2447		0.70544	0.449703	0.371199	1.4255
Q9UJU6	DBNL	Drebrin-like protein	15.0519	14.2603	14.4046	14.265	14.7727	14.3805	14.3942	13.8381	14.3046	14.2985	13.7288	14.2623	14.329	14.99	14.2199	14.0884		0.384426	0.655736	-0.143205	-0.870969
P11182	DBT	Lipoamide acyltransferase component of branched-chain alpha-keto acid dehydrogenase complex. mitochondrial	14.5271	14.1299	15.1577	14.8127	14.7358	14.8499	14.3474	14.695	14.503	14.9201	14.8916	14.9597	14.6999	14.7191	14.7574	14.8194		0.493324	0.58169	0.126858	1.06761
Q58WW2-3;Q58WW2-4	DCAF6	Isoform of Q58WW2. Isoform 3 of DDB1- and CUL4-associated factor 6;Isoform of Q58WW2. Isoform 4 of DDB1- and CUL4-associated factor 6	15.8211	15.8194	15.5081	15.3609	15.9504	15.7296	15.0702	15.6386	15.7143	15.6353	15.1991	15.4658	15.224	15.5431	15.4281	15.795		0.429888	0.619619	-0.111705	-0.954481
O15075;O15075-2;Q5VZY9	DCLK1	Serine/threonine-protein kinase DCLK1;Isoform of O15075. Isoform 1 of Serine/threonine-protein kinase DCLK1;Isoform of O15075. Serine/threonine-protein kinase DCLK1	11.2621	11.8363	11.6342	10.5876	10.0337	9.58086	11.9339	11.015	11.5741	10.8894	11.4594	10.957	10.3443	13.4786	13.4183	12.3033		0.801974	0.393161	0.817583	1.58153
P07585	DCN	Decorin	19.3897	19.1118	19.363	19.1083	19.57	19.0731	18.8842	19.4044	19.3404	18.7966	19.077	19.3005	18.8278	19.7242	19.5861	19.0421		0.0514544	0.949343	-0.0262191	-0.145692
Q96C86	DCPS	m7GpppX diphosphatase	11.8068	11.6417	12.2089	11.9493	12.4643	12.1907	12.0239	12.6741	12.5648	11.4864	12.2787	12.5026	12.3593	12.0681	13.1069	12.3638		0.587907	0.527447	0.221379	1.23041
E7EX90;Q14203-3;Q14203-4;Q14203-5	DCTN1	Isoform of Q14203. Dynactin subunit 1;Isoform of Q14203. Isoform 3 of Dynactin subunit 1;Isoform of Q14203. Isoform 4 of Dynactin subunit 1;Isoform of Q14203. Isoform 5 of Dynactin subunit 1	14.1754	12.9343	13.3318	14.285	13.0468	13.2895	13.1046	12.8295	13.5832	13.6016	13.4743	13.3964	13.8868	13.2617	13.4231	13.609		0.289962	0.733753	0.154909	0.689167
Q13561;Q13561-2;Q13561-3	DCTN2	Dynactin subunit 2;Isoform of Q13561. Isoform 2 of Dynactin subunit 2;Isoform of Q13561. Isoform 3 of Dynactin subunit 2	15.8509	16.0346	16.4978	16.2972	16.7484	16.5229	16.1158	15.7511	16.2493	16.3191	15.8712	16.2612	16.5631	16.5876	16.1188	16.0317		0.0713651	0.927151	0.0228945	0.198273
O75935;O75935-3	DCTN3	Dynactin subunit 3;Isoform of O75935. Isoform 3 of Dynactin subunit 3	13.7964	14.2463	12.8759	13.3674	13.9523	12.8225	12.9371	13.4929	13.7346	12.0992	13.9402	14.0286	13.6957	13.518	13.5917	13.9947		0.148178	0.861945	0.138995	0.386053
Q9UJW0	DCTN4	Dynactin subunit 4	10.4389	10.2945	14.1444	14.6749	13.1734	11.5384	12.5057	11.0728	9.72636	14.1778	10.5781	13.7148	13.8212	10.6979	12.4731	12.8548		0.0109994	0.985058	0.0251358	0.0324865
E5RK00;O00399	DCTN6	Isoform of O00399. Dynactin subunit 6;Dynactin subunit 6	11.0773	14.1259	15.0506	17.5484	15.3523	14.367	15.1129	14.1479	14.1859	15.4055	14.1545	15.0232	18.0786	13.6559	13.5379	14.2841		0.0996058	0.907092	0.192923	0.269861
Q9H773	DCTPP1	dCTP pyrophosphatase 1	15.5769	15.9557	15.9188	15.4691	15.3471	15.5764	15.2466	15.4539	15.9435	15.9701	15.3444	15.9576	15.6152	16.2855	15.7883	16.0217		1.09764	0.262506	0.297726	2.04715
Q96GG9	DCUN1D1	DCN1-like protein 1	13.3208	12.7972	13.5808	13.4344	13.8503	13.592	13.7013	13.3519	13.7616	13.3852	13.1973	13.58	14.1169	12.9973	13.4785	13.2826		0.0518045	0.949654	0.02132	0.146633
J3KS22;J3QS36;Q7Z4W1	DCXR	Isoform of Q7Z4W1. L-xylulose reductase (Fragment);Isoform of Q7Z4W1. L-xylulose reductase (Fragment);L-xylulose reductase	14.6477	16.4948	16.3098	14.8521	14.9949	15.9289	14.9047	15.9461	14.9882	16.4596	15.0261	15.8695	15.5295	14.5977	15.335	15.7128		0.0850013	0.91698	-0.0701015	-0.233251
O94760	DDAH1	N(G).N(G)-dimethylarginine dimethylaminohydrolase 1	18.1444	17.7926	16.9355	17.6668	18.2467	18.6498	18.8037	17.7022	17.8608	17.647	16.7953	17.4423	18.3914	18.3624	18.3301	18.0341		0.739045	0.427853	-0.134786	-1.48017
O95865	DDAH2	N(G).N(G)-dimethylarginine dimethylaminohydrolase 2	14.8352	14.7919	14.4976	14.544	14.3701	15.0206	14.7245	14.2458	14.8946	14.8202	14.4272	14.5867	14.8654	15.0802	14.9612	14.5109		1.18019	0.234312	0.139576	2.17588
Q16531	DDB1	DNA damage-binding protein 1	14.4284	14.4859	14.3933	14.2423	14.3563	14.4142	14.1	14.4153	14.5454	14.3798	14.4964	14.4808	14.5633	14.2755	14.6281	14.6013		1.0136	0.291146	0.141885	1.91587
Q5TDH0;Q5TDH0-3	DDI2	Protein DDI1 homolog 2;Isoform of Q5TDH0. Isoform 3 of Protein DDI1 homolog 2	14.4347	13.4333	13.8764	14.0841	13.9291	13.4287	12.1635	12.1719	12.0689	12.7441	12.3037	13.3522	13.3814	13.1955	13.6517	12.4802		0.645159	0.488454	-0.542989	-1.32628
A0A0C4DGS1;P39656;P39656-2	DDOST	Isoform of P39656. Dolichyl-diphosphooligosaccharide--protein glycosyltransferase 48 kDa subunit;Dolichyl-diphosphooligosaccharide--protein glycosyltransferase 48 kDa subunit;Isoform of P39656. Isoform 2 of Dolichyl-diphosphooligosaccharide--protein glycosyltransferase 48 kDa subunit	14.283	14.0958	15.0762	13.9537	14.1568	14.1896	14.4002	14.4754	14.1557	14.2184	14.556	14.9729	14.1254	14.844	14.6538	14.6022		0.52232	0.562141	0.187234	1.11819
Q96HY6	DDRGK1	DDRGK domain-containing protein 1	13.903	13.9167	15.2854	14.4178	14.8529	14.9686	14.234	14.1243	14.6313	14.7375	14.1416	14.9504	14.9864	15.246	14.4413	14.7319		0.586258	0.527897	0.270442	1.22763
J3KQ18;P30046	DDT	Isoform of P30046. D-dopachrome decarboxylase;D-dopachrome decarboxylase	18.1543	17.3386	18.1462	16.0229	17.5304	17.5953	18.6343	18.6217	18.5587	17.147	18.5496	15.7345	17.9816	18.354	18.7006	18.6242		0.799612	0.393627	0.200809	1.57775
Q92499	DDX1	ATP-dependent RNA helicase DDX1	13.8665	14.3707	14.3258	14.0901	14.7044	14.2864	14.8125	14.4285	14.6681	14.4083	14.8028	14.4456	14.9631	13.8196	14.8849	14.764		0.929727	0.329966	0.233947	1.78424
A0A1W2PQ51;A0A1X7SBZ2;Q92841;Q92841-1;Q92841-2;Q92841-3	DDX17	Isoform of Q92841. Probable ATP-dependent RNA helicase DDX17;Isoform of Q92841. Probable ATP-dependent RNA helicase DDX17;Probable ATP-dependent RNA helicase DDX17;Isoform of Q92841. Isoform 2 of Probable ATP-dependent RNA helicase DDX17;Isoform of Q92841. Isoform 3 of Probable ATP-dependent RNA helicase DDX17;Isoform of Q92841. Isoform 4 of Probable ATP-dependent RNA helicase DDX17	14.0717	12.9983	14.9072	14.3865	14.7077	14.4764	13.9618	13.9175	14.1828	14.3336	14.0495	14.3353	14.4071	14.0623	13.9798	13.9485		0.0246804	0.977936	-0.0160444	-0.0718178
I3L0H8;Q9NUU7	DDX19A	Isoform of Q9NUU7. ATP-dependent RNA helicase DDX19A;ATP-dependent RNA helicase DDX19A	15.3856	15.1453	15.6813	15.4598	15.8536	15.6631	15.2376	15.5538	15.3848	15.4236	14.9673	15.5802	15.4001	14.9553	15.1975	15.6197		0.64429	0.488729	-0.18149	-1.32484
O00148	DDX39A	ATP-dependent RNA helicase DDX39A	17.7659	17.7768	18.2029	18.3142	18.1819	12.5275	17.9217	9.64684	17.7438	18.0781	17.8292	18.2308	18.1928	12.0904	17.9751	18.2161		0.41341	0.63515	1.0023	0.924468
Q13838;Q13838-2	DDX39B	Spliceosome RNA helicase DDX39B;Isoform of Q13838. Isoform 2 of Spliceosome RNA helicase DDX39B	14.61	14.8936	14.0489	14.425	13.9867	14.9391	14.1939	14.4935	14.636	14.4445	14.755	14.6345	15.0812	14.8346	15.1863	14.8521		0.968543	0.312624	0.354225	1.84526
A0A0D9SF53;A0A0D9SFB3;A0A0D9SG12;O00571;O00571-2	DDX3X	Isoform of O00571. ATP-dependent RNA helicase DDX3X;Isoform of O00571. ATP-dependent RNA helicase DDX3X;Isoform of O00571. ATP-dependent RNA helicase DDX3X;ATP-dependent RNA helicase DDX3X;Isoform of O00571. Isoform 2 of ATP-dependent RNA helicase DDX3X	15.101	15.3957	13.7187	13.7326	13.6275	12.5126	14.8145	14.2513	14.4011	13.8874	14.9203	13.1383	14.304	14.373	14.4715	13.567		0.00958876	0.986246	-0.0114125	-0.0283647
A0A0C4DG89;Q7L014	DDX46	Isoform of Q7L014. Probable ATP-dependent RNA helicase DDX46;Probable ATP-dependent RNA helicase DDX46	12.6233	10.5994	11.7575	13.1584	11.5455	10.9577	10.8976	12.1191	12.8015	12.4556	12.8523	10.1369	12.994	12.1464	12.7213	13.1664		0.596692	0.522306	0.70199	1.24524
J3KTA4;P17844;P17844-2	DDX5	Isoform of P17844. Probable ATP-dependent RNA helicase DDX5;Probable ATP-dependent RNA helicase DDX5;Isoform of P17844. Isoform 2 of Probable ATP-dependent RNA helicase DDX5	14.6008	14.6866	15.1085	14.632	14.64	14.7842	14.2311	13.7971	14.0592	14.0561	14.0283	14.4303	14.6112	14.1688	14.4202	13.662		1.46883	0.167544	-0.380517	-2.62871
P26196	DDX6	Probable ATP-dependent RNA helicase DDX6	13.1965	13.3244	12.1432	11.7524	13.9842	10.2381	13.7115	13.8004	13.9367	14.2815	13.8089	13.1638	15.0163	13.2867	13.2071	13.422		1.37455	0.190101	0.996542	2.47995
Q16698;Q16698-2	DECR1	2.4-dienoyl-CoA reductase. mitochondrial;Isoform of Q16698. Isoform 2 of 2.4-dienoyl-CoA reductase. mitochondrial	20.3367	20.2111	20.6019	20.1783	19.7322	20.5714	19.6705	20.1545	20.9723	20.4561	19.9815	20.5108	20.2322	20.4603	20.083	20.4807		0.760518	0.411986	0.215043	1.5149
P35659	DEK	Protein DEK	14.3146	16.5391	14.054	13.7789	17.7636	13.6874	17.2901	13.8615	17.2123	14.2475	16.4391	16.8347	17.9439	16.1313	16.3612	17.0153		0.965896	0.313942	1.36202	1.84111
O43583	DENR	Density-regulated protein	17.0295	17.1369	16.6099	16.5037	16.936	16.9667	16.8516	16.5669	16.9225	16.6264	16.3172	16.4854	16.883	16.8951	16.5473	16.6802		1.2004	0.227333	-0.155506	-2.20741
Q8TB45	DEPTOR	DEP domain-containing mTOR-interacting protein	13.9619	14.3779	13.3275	13.6159	14.2789	12.9187	13.4799	13.1822	12.6582	11.7014	12.3025	12.4006	12.6471	10.5079	14.3744	12.7298		1.75799	0.114456	-1.22761	-3.0944
P17661	DES	Desmin	22.3118	22.3846	22.3193	22.5621	23.4121	22.4033	22.4971	22.1381	22.3804	22.3229	22.4876	22.3046	23.326	23.0394	22.6833	22.437		0.58732	0.527305	0.119112	1.22942
O00273	DFFA	DNA fragmentation factor subunit alpha	11.3921	10.246	13.9976	13.1133	11.2207	12.3489	10.4222	11.1779	11.8831	12.0062	13.8821	13.1707	11.5664	13.6621	11.6335	11.9411		1.78787	0.109588	0.728333	3.14357
A0A0A0MR74;O75907	DGAT1	Isoform of O75907. Diacylglycerol O-acyltransferase 1;Diacylglycerol O-acyltransferase 1	16.2152	17.0047	16.1785	16.564	16.0835	16.0898	16.5777	16.5774	16.271	16.0275	15.812	15.7668	16.5373	15.7048	16.6853	15.976		0.95124	0.318987	-0.31375	-1.81809
Q7Z3D6-2	DGLUCY	Isoform of Q7Z3D6. Isoform 2 of D-glutamate cyclase. mitochondrial	16.2502	16.2632	18.0363	14.4999	15.9609	16.2758	16.9198	17.2402	16.6334	16.4467	17.2772	12.8769	16.313	15.7752	17.3959	17.2746		0.297457	0.727512	-0.181686	-0.704071
I3NI32;Q02127	DHODH	Isoform of Q02127. Dihydroorotate dehydrogenase (quinone). mitochondrial;Dihydroorotate dehydrogenase (quinone). mitochondrial	11.4336	11.9727	15.739	15.5461	15.4689	14.2285	14.1007	14.0607	13.8421	15.0102	14.2602	14.6501	14.8005	13.5926	13.7814	14.2073		0.130668	0.879151	0.199268	0.34508
Q6UWP2;Q6UWP2-3	DHRS11	Dehydrogenase/reductase SDR family member 11;Isoform of Q6UWP2. Isoform 3 of Dehydrogenase/reductase SDR family member 11	15.4732	10.2445	13.4182	11.1349	11.1655	13.6556	13.3732	16.7524	12.9584	13.3404	13.1277	12.9398	10.5604	13.1049	12.9066	13.6085		0.182095	0.828881	-0.333828	-0.462853
Q9BTZ2;Q9BTZ2-4;Q9BTZ2-8	DHRS4	Dehydrogenase/reductase SDR family member 4;Isoform of Q9BTZ2. Isoform 4 of Dehydrogenase/reductase SDR family member 4;Isoform of Q9BTZ2. Isoform 8 of Dehydrogenase/reductase SDR family member 4	12.5202	12.3371	13.3966	12.2872	12.9551	13.2928	12.0912	13.0282	13.0256	12.9412	12.6025	14.3045	13.7299	13.0707	12.2779	13.4637		0.76398	0.410728	0.438461	1.52048
Q9Y394;Q9Y394-2	DHRS7	Dehydrogenase/reductase SDR family member 7;Isoform of Q9Y394. Isoform 2 of Dehydrogenase/reductase SDR family member 7	13.7956	14.1658	16.0636	13.7981	14.2313	14.1161	13.9674	13.9932	14.1551	14.0684	13.5276	14.2247	14.308	14.879	14.2877	14.3829		0.0351375	0.962927	-0.0372164	-0.101135
A0A0C4DGQ8;Q6IAN0	DHRS7B	Isoform of Q6IAN0. Dehydrogenase/reductase SDR family member 7B;Dehydrogenase/reductase SDR family member 7B	13.3713	13.5747	14.7089	14.2272	14.3358	14.2936	13.9552	13.7983	13.1995	13.5557	14.0674	14.0977	13.4083	13.71	13.0875	13.8564		1.68205	0.122969	-0.410303	-2.97045
A6NNS2;A6NNS2-2	DHRS7C	Dehydrogenase/reductase SDR family member 7C;Isoform of A6NNS2. Isoform 2 of Dehydrogenase/reductase SDR family member 7C	13.3509	15.2356	16.2257	16.0948	15.6676	15.971	16.0666	15.0818	15.7914	15.4325	15.789	15.5548	15.1346	12.8105	15.1018	15.1622		0.280036	0.738764	-0.36465	-0.669289
Q96HY7	DHTKD1	Probable 2-oxoglutarate dehydrogenase E1 component DHKTD1. mitochondrial	13.6893	11.396	14.0596	12.9913	10.7424	14.4578	14.0397	13.1635	13.8787	13.3131	13.9936	11.4333	13.3049	13.6949	14.0524	13.5676		0.301852	0.722061	0.337347	0.712766
Q08211	DHX9	ATP-dependent RNA helicase A	14.6295	14.6466	15.8033	14.6055	14.6375	14.7123	14.797	14.6931	14.877	14.9349	14.6081	14.7076	15.0287	14.8142	14.8943	14.8686		0.0516697	0.94942	0.0260878	0.146271
Q9NR28;Q9NR28-2	DIABLO	Diablo homolog. mitochondrial;Isoform of Q9NR28. Isoform 2 of Diablo homolog. mitochondrial	14.9178	14.8097	15.6227	14.8334	14.8078	15.0354	14.7174	15.6568	15.3264	15.2817	14.9386	15.3794	15.0241	14.8103	15.0057	15.0133		0.0992686	0.907093	0.0473211	0.269025
A0A0G2JH68;A0A140T8Z0;O60610;O60610-2;O60610-3	DIAPH1	Isoform of O60610. Protein diaphanous homolog 1;Isoform of O60610. Protein diaphanous homolog 1;Protein diaphanous homolog 1;Isoform of O60610. Isoform 2 of Protein diaphanous homolog 1;Isoform of O60610. Isoform 3 of Protein diaphanous homolog 1	12.8238	13.9716	10.4509	12.6086	13.5136	13.3945	14.0095	13.5529	13.7855	13.703	13.7202	13.5676	13.6937	14.2491	14.5069	13.4303		1.07832	0.265747	0.791357	2.017
Q9P265	DIP2B	Disco-interacting protein 2 homolog B	14.2303	15.0107	15.3186	13.7385	14.8051	15.2986	14.2935	14.5408	14.1101	14.3926	14.1739	14.7642	14.4481	15.2855	13.9376	14.7445		0.330593	0.699663	-0.172441	-0.768901
A0A0U1RQW6;Q9Y2E4	DIP2C	Isoform of Q9Y2E4. Disco-interacting protein 2 homolog C;Disco-interacting protein 2 homolog C	11.3572	9.81975	13.8215	10.6886	11.5454	12.9694	13.6882	8.66975	9.75015	13.7009	10.1367	13.6567	13.7798	11.4344	9.61413	13.0153		0.0960662	0.910543	0.316036	0.261066
Q8ND98;Q96MX6;Q96MX6-2	DKFZp434B156;WDR92;WDR92	Isoform of Q96MX6. Uncharacterized protein DKFZp434B156;WD repeat-containing protein 92;Isoform of Q96MX6. Isoform 2 of WD repeat-containing protein 92	11.3267	15.825	16.7846	17.4982	15.8647	16.448	15.678	11.0024	15.78	16.9013	8.49829	14.5631	15.8313	15.4639	12.0591	16.1072		0.163238	0.848992	-0.65293	-0.420552
Q68DG0	DKFZp779D0968	Isoform of Q9UBY9. Heat shock protein beta-7	14.5019	14.9968	15.2219	14.2735	15.0724	15.2241	14.7806	14.1312	14.655	14.3749	14.5326	14.4981	14.972	14.9241	14.6018	14.3076		0.650958	0.486061	-0.16706	-1.3359
P10515	DLAT	Dihydrolipoyllysine-residue acetyltransferase component of pyruvate dehydrogenase complex. mitochondrial	18.2093	18.2309	18.573	17.9947	18.0771	18.1176	18.1289	18.3282	18.8908	18.9772	18.6566	18.5063	18.3961	18.0065	18.1438	18.633		1.62898	0.133549	0.318842	2.88457
P09622	DLD	Dihydrolipoyl dehydrogenase. mitochondrial	19.3111	19.4861	19.7142	19.2492	19.559	20.071	19.2461	19.5926	19.487	19.2138	19.3745	19.4268	19.7289	19.9208	19.6606	20.0948		0.333543	0.697784	0.0847282	0.774595
P36957	DLST	Dihydrolipoyllysine-residue succinyltransferase component of 2-oxoglutarate dehydrogenase complex. mitochondrial	19.4338	19.1753	19.0055	18.8473	18.9771	19.6793	19.6501	19.9516	20.0787	19.4846	19.8876	19.3723	19.8034	19.8929	19.5526	20.5697	+	2.39477	0.0495304	0.490235	4.20125
Q96GE9;Q96GE9-2	DMAC1	Distal membrane-arm assembly complex protein 1;Isoform of Q96GE9. Isoform 2 of Distal membrane-arm assembly complex protein 1	15.776	13.8456	14.9591	14.6688	13.23	15.2503	15.3732	15.2171	16.1699	14.7654	15.8556	15.1089	14.2867	14.4181	13.8844	15.4334		0.258274	0.757234	0.20031	0.625101
P11532;P11532-4	DMD	Dystrophin;Isoform of P11532. Isoform 3 of Dystrophin	17.206	17.2673	17.1565	17.2513	17.3911	17.0846	17.4747	17.0601	16.7421	17.1789	17.132	16.8053	17.1753	16.4398	17.4175	16.7434		2.03626	0.0732871	-0.282182	-3.56166
Q08495;Q08495-2	DMTN	Dematin;Isoform of Q08495. Isoform 2 of Dematin	15.6158	15.4139	15.1656	15.5625	15.0461	15.117	14.8961	15.2744	15.5506	15.2675	15.1615	15.2245	15.4018	15.5663	15.3242	15.4566		0.481767	0.589293	0.10768	1.04726
O60884	DNAJA2	DnaJ homolog subfamily A member 2	15.9602	15.8978	16.1051	16.1535	16.5643	16.0541	16.0297	16.0846	15.9891	16.0465	15.9932	16.145	16.1713	16.0508	15.8314	15.9896		0.667385	0.476283	-0.0790513	-1.36305
Q96EY1	DNAJA3	DnaJ homolog subfamily A member 3. mitochondrial	15.6291	15.0734	15.9453	12.1744	11.8107	14.731	12.0988	15.0243	15.7965	15.9541	15.4034	15.1383	16.3605	15.1237	15.1188	15.2654		1.24873	0.220125	1.45922	2.28284
Q8WW22;Q8WW22-2	DNAJA4	DnaJ homolog subfamily A member 4;Isoform of Q8WW22. Isoform 2 of DnaJ homolog subfamily A member 4	14.8847	14.3627	14.9038	13.4554	14.6789	14.9312	14.1837	14.428	14.6038	14.6354	14.3671	13.9215	14.5244	13.8264	13.9806	14.1908		0.637179	0.493036	-0.222301	-1.31302
P25685	DNAJB1	DnaJ homolog subfamily B member 1	13.9959	11.1443	15.0524	13.3034	13.3561	15.4895	13.394	15.4667	14.93	13.1135	14.44	13.2558	13.959	12.6894	15.5945	12.9217		0.0192077	0.980468	-0.0372937	-0.0562216
P25686	DNAJB2	DnaJ homolog subfamily B member 2	13.6425	14.1315	14.4114	14.0167	14.1054	13.6158	14.3578	13.752	13.8313	13.836	13.5696	14.1431	13.9589	14.5689	13.8109	13.7666		0.136465	0.872006	-0.0684589	-0.358752
Q9UDY4	DNAJB4	DnaJ homolog subfamily B member 4	15.0648	15.7768	15.9239	15.7306	16.0588	15.7104	15.666	15.6609	14.961	15.7199	15.6343	15.626	15.7892	15.5669	15.7063	15.4896		2.05231	0.0732245	-0.137392	-3.58932
A0A0J9YX62;O75190-3	DNAJB6	Isoform of O75190. DnaJ homolog subfamily B member 6;Isoform of O75190. Isoform C of DnaJ homolog subfamily B member 6	14.1304	13.7621	13.639	13.5561	13.3901	13.8918	12.6911	13.2521	14.127	13.0119	14.694	13.3353	14.148	15.2074	14.7134	13.8048		0.980834	0.306238	0.591158	1.86454
Q96DA6;Q96DA6-2	DNAJC19	Mitochondrial import inner membrane translocase subunit TIM14;Isoform of Q96DA6. Isoform 2 of Mitochondrial import inner membrane translocase subunit TIM14	14.9698	14.7982	14.3351	14.3133	14.2466	14.5873	13.8375	14.587	15.0089	14.5973	14.6935	14.9079	14.6047	14.6351	14.7683	14.5867		1.09069	0.265077	0.26592	2.03631
Q9H3Z4;Q9H3Z4-2	DNAJC5	DnaJ homolog subfamily C member 5;Isoform of Q9H3Z4. Isoform 2 of DnaJ homolog subfamily C member 5	11.4871	13.5261	13.0454	12.1451	13.1672	13.0036	12.7384	10.2618	12.7497	12.5418	10.226	12.9611	12.9522	14.054	13.4164	12.9577		0.212507	0.80663	0.310519	0.529171
Q99615	DNAJC7	DnaJ homolog subfamily C member 7	20.6865	11.6688	19.8481	11.6317	21.2767	10.9089	12.819	13.2748	10.9953	11.3491	18.7945	13.1425	11.6678	15.0148	14.7697	18.3541		0.197662	0.816073	-1.00333	-0.497079
O00429;O00429-2	DNM1L	Dynamin-1-like protein;Isoform of O00429. Isoform 4 of Dynamin-1-like protein	13.6005	13.6383	13.031	12.8342	12.9585	14.0265	13.4017	13.7117	13.751	13.8639	14.3983	13.9778	13.9574	13.542	14.1056	14.2324		1.51151	0.15592	0.578237	2.69648
P50570;P50570-2;P50570-3;P50570-4;P50570-5	DNM2	Dynamin-2;Isoform of P50570. Isoform 2 of Dynamin-2;Isoform of P50570. Isoform 3 of Dynamin-2;Isoform of P50570. Isoform 4 of Dynamin-2;Isoform of P50570. Isoform 5 of Dynamin-2	13.8574	13.8011	13.5846	13.9236	13.7425	13.9793	13.5057	13.6771	13.9941	13.8474	13.6692	13.8951	14.0295	13.8214	13.9731	13.9961		1.07159	0.268021	0.144336	2.0065
Q6XZF7	DNMBP	Dynamin-binding protein	17.9971	17.8353	14.6001	14.683	14.8788	17.7317	15.4247	14.6373	14.6686	15.2557	14.8712	17.3377	14.957	17.525	17.4298	14.6508		0.0683544	0.931083	-0.136512	-0.19044
E7ETB3;Q9ULA0	DNPEP	Isoform of Q9ULA0. Aspartyl aminopeptidase;Aspartyl aminopeptidase	16.0352	16.1143	16.2251	15.8719	15.9667	15.7596	15.7338	15.9192	16.0656	15.7121	15.7653	16.0454	15.9231	15.4867	15.6452	15.7765		1.04971	0.27656	-0.150737	-1.97233
H0Y8X4;O43598	DNPH1	Isoform of O43598. 2'-deoxynucleoside 5'-phosphate N-hydrolase 1 (Fragment);2'-deoxynucleoside 5'-phosphate N-hydrolase 1	17.2849	16.7763	17.3428	16.8807	17.262	16.6968	16.3853	16.1803	17.185	16.8443	16.381	17.2898	17.2609	16.8588	16.8844	16.3779		0.0778481	0.921898	0.0341418	0.215002
Q5QJE6	DNTTIP2	Deoxynucleotidyltransferase terminal-interacting protein 2	17.0374	17.7696	16.0778	17.3704	16.551	17.8622	18.2253	18.1097	17.1335	17.9377	18.6833	17.8202	17.0203	18.7888	19.111	18.4962		1.46512	0.166873	0.748435	2.62284
Q9BU89	DOHH	Deoxyhypusine hydroxylase	12.836	13.394	13.797	13.1136	13.8171	14.4177	13.5362	12.8949	13.4393	13.4018	13.288	13.3524	14.0314	14.5798	14.0557	13.6609		0.927	0.330347	0.250341	1.77995
I3L1H5;Q9BZG8	DPH1	Isoform of Q9BZG8. 2-(3-amino-3-carboxypropyl)histidine synthase subunit 1 (Fragment);2-(3-amino-3-carboxypropyl)histidine synthase subunit 1	10.5335	8.93417	13.2578	11.4997	11.5021	10.676	10.3142	10.8957	9.76326	11.6963	10.0176	13.519	11.7395	13.4098	12.0053	11.0931		0.440477	0.61457	0.703838	0.973622
Q96FX2;Q96FX2-2	DPH3	DPH3 homolog;Isoform of Q96FX2. Isoform 2 of DPH3 homolog	16.0137	10.4955	10.2647	16.3694	16.2741	16.3844	15.7178	15.7637	16.1715	15.4628	15.5251	16.2318	15.7948	16.257	15.2817	15.825		0.650998	0.486409	1.1583	1.33596
G3V180;G3V1D3;Q9NY33;Q9NY33-4	DPP3	Isoform of Q9NY33. Dipeptidyl peptidase 3;Isoform of Q9NY33. Dipeptidyl peptidase 3;Dipeptidyl peptidase 3;Isoform of Q9NY33. Isoform 4 of Dipeptidyl peptidase 3	15.6827	15.9889	15.8951	16.8936	17.5154	16.1753	15.6334	15.4046	15.4015	16.3872	15.1149	15.7529	15.7868	15.9348	15.4876	15.3803		1.0924	0.264638	-0.492864	-2.03897
M0R2A8;Q86TI2;Q86TI2-2;Q86TI2-4	DPP9	Isoform of Q86TI2. Dipeptidyl peptidase 9;Dipeptidyl peptidase 9;Isoform of Q86TI2. Isoform 2 of Dipeptidyl peptidase 9;Isoform of Q86TI2. Isoform 3 of Dipeptidyl peptidase 9	13.4187	13.9106	14.2784	14.6052	14.8424	11.0538	12.8307	13.3658	13.5241	14.6724	14.3191	13.3515	14.4533	13.8784	13.1065	10.3784		0.0466075	0.953077	-0.0777388	-0.132601
Q07507	DPT	Dermatopontin	17.7322	16.4815	16.7591	16.6795	17.0674	17.2878	16.4916	16.8169	17.7376	16.0421	17.8997	16.3537	16.6956	17.1223	18.0256	16.8841		0.28921	0.733994	0.180607	0.687667
Q9C005	DPY30	Protein dpy-30 homolog	11.2324	12.191	12.6201	11.1445	12.4413	10.154	11.7324	10.84	11.43	11.119	13.4075	12.5271	12.6502	13.2464	14.1415	11.0573		1.003	0.297689	0.902891	1.89928
A0A1C7CYX9;Q16555	DPYSL2	Isoform of Q16555. Dihydropyrimidinase-related protein 2;Dihydropyrimidinase-related protein 2	16.408	16.3997	16.5504	15.9816	16.4295	16.4183	15.8649	15.9388	16.3735	16.2769	16.0075	16.1151	15.8622	15.9528	15.8907	15.8515		1.15253	0.24406	-0.20763	-2.13276
Q14195-2	DPYSL3	Isoform of Q14195. Isoform LCRMP-4 of Dihydropyrimidinase-related protein 3	17.3463	17.4334	17.8106	16.6566	17.1629	17.6436	17.2675	17.5634	17.4018	16.8371	17.712	17.0313	17.3698	17.7944	17.548	17.5622		0.170403	0.842418	0.0465331	0.436738
C9JCC6;E9PQX9;Q14919;Q14919-2	DRAP1	Isoform of Q14919. Dr1-associated corepressor;Isoform of Q14919. Dr1-associated corepressor;Dr1-associated corepressor;Isoform of Q14919. Isoform 2 of Dr1-associated corepressor	14.4658	13.6822	14.6628	10.5765	14.5695	14.4675	14.0292	13.2434	13.4596	13.29	13.2176	14.2713	13.6976	14.4711	13.6268	13.4564		0.0155481	0.981934	-0.0258095	-0.0456914
A8MZF9;P55039	DRG2	Isoform of P55039. Developmentally-regulated GTP-binding protein 2;Developmentally-regulated GTP-binding protein 2	11.8015	12.9817	13.8195	13.9546	13.747	13.719	13.6327	13.8187	13.9335	13.2897	13.6018	14.0842	14.5453	12.5428	12.5003	14.2334		0.161191	0.849879	0.157027	0.415902
Q03001-3	DST	Isoform of Q03001. Isoform 3 of Dystonin	10.4411	15.3961	15.9079	15.5562	15.5468	18.2597	15.3576	11.8288	10.2624	15.5962	14.0546	16.9719	16.2992	17.2707	15.2217	17.257		0.318774	0.707971	0.579952	0.745968
P60981	DSTN	Destrin	15.2883	14.949	14.6369	14.7301	15.1864	14.9066	15.3113	14.7165	14.289	14.9232	15.1862	15.0266	15.0188	14.8698	15.1055	14.965		0.0955483	0.910899	-0.0426282	-0.259775
Q8TEA8	DTD1	D-aminoacyl-tRNA deacylase 1	14.8626	15.1571	15.2376	15.19	14.1642	14.8086	15.2462	13.8391	14.0192	15.185	13.7471	13.9043	14.2506	14.8893	14.1928	13.8098		1.30287	0.206421	-0.563428	-2.3675
K7ERH7;M0R021	DTNA	Isoform of Q9Y4J8. Dystrobrevin alpha (Fragment);Isoform of Q9Y4J8. Dystrobrevin alpha	13.5415	14.4445	14.5152	11.2716	9.61253	10.3766	9.94501	13.2003	10.6263	15.0496	13.6825	14.8054	9.73636	13.6959	14.2511	9.84147		0.235155	0.7807	0.597668	0.577183
Q9Y4J8	DTNA	Dystrobrevin alpha	16.8412	16.6534	16.7349	16.6717	16.8779	16.7897	16.8546	16.7112	16.6009	16.4986	16.5839	16.6114	16.7437	16.4945	16.8597	16.5892	+	2.46194	0.0455238	-0.144095	-4.32665
Q68J44	DUPD1	Dual specificity phosphatase DUPD1	15.0303	15.0727	14.3828	15.2742	15.1105	15.7881	14.6595	15.3286	14.8226	15.2203	15.2074	14.9748	15.6428	15.0024	15.2567	14.3984		0.0226376	0.978645	-0.0151653	-0.066017
Q9BVJ7	DUSP23	Dual specificity protein phosphatase 23	10.6796	10.8781	12.0107	13.8862	11.8679	11.2012	10.7239	11.6248	13.6765	13.8165	12.8658	10.8166	13.8152	10.7578	11.8713	10.6194		0.405098	0.639095	0.67084	0.909221
Q5VZP5	DUSP27	Inactive dual specificity phosphatase 27	14.4158	11.5522	13.2536	12.599	13.7597	12.5739	12.3014	12.9195	13.2751	13.343	13.0153	11.7977	13.4714	13.704	11.957	12.661		0.0185066	0.980723	-0.0188202	-0.0542105
P51452	DUSP3	Dual specificity protein phosphatase 3	17.404	17.3061	16.5151	18.5179	16.3554	16.332	16.5236	16.3338	16.6523	16.6501	17.0703	16.7639	16.7987	16.8114	16.5515	16.7035		0.223567	0.793889	-0.160771	-0.552756
H0YKI0;P33316	DUT	Isoform of P33316. Deoxyuridine 5'-triphosphate nucleotidohydrolase. mitochondrial;Deoxyuridine 5'-triphosphate nucleotidohydrolase. mitochondrial	14.9784	14.8516	10.2148	14.4167	15.1584	12.8345	10.8139	14.4743	15.0225	14.4308	13.7616	14.2736	14.4566	15.0128	14.9081	13.9899		0.730555	0.433029	1.01416	1.4664
Q14204	DYNC1H1	Cytoplasmic dynein 1 heavy chain 1	13.931	14.084	13.3071	13.2976	13.2885	13.3768	13.374	13.2048	13.5569	14.3306	13.4843	13.6693	13.5752	13.2458	13.6144	13.8905		0.852884	0.366373	0.187902	1.66273
Q13409-2;Q13409-3	DYNC1I2	Isoform of Q13409. Isoform 2B of Cytoplasmic dynein 1 intermediate chain 2;Isoform of Q13409. Isoform 2C of Cytoplasmic dynein 1 intermediate chain 2	16.1389	15.6014	15.9917	15.9182	16.0217	16.0775	15.5336	16.132	15.998	15.9301	15.7106	16.3078	15.9651	16.1639	15.8123	15.9747		0.258706	0.757215	0.0559138	0.625986
E9PHI6;Q9Y6G9	DYNC1LI1	Isoform of Q9Y6G9. Cytoplasmic dynein 1 light intermediate chain 1;Cytoplasmic dynein 1 light intermediate chain 1	14.8227	14.9854	15.2381	15.4639	15.6758	14.9139	14.9552	14.9167	14.9582	14.6901	14.7713	14.8985	14.9132	14.9576	14.6888	14.7328		1.55935	0.148968	-0.295144	-2.77277
O43237;O43237-2	DYNC1LI2	Cytoplasmic dynein 1 light intermediate chain 2;Isoform of O43237. Isoform 2 of Cytoplasmic dynein 1 light intermediate chain 2	14.5652	13.677	13.7789	14.1772	13.8716	14.359	13.4505	14.3003	13.6861	13.8114	13.6176	13.5317	14.234	13.7081	13.9853	13.8146		0.577155	0.532006	-0.223848	-1.21221
Q96FJ2	DYNLL2	Dynein light chain 2. cytoplasmic	17.1106	16.554	18.0917	17.2145	16.3311	15.9787	16.62	16.015	15.7983	16.6377	15.5179	16.5302	16.1475	16.1555	16.085	15.946		1.04065	0.279775	-0.637186	-1.95817
B1AKR6;Q9NP97	DYNLRB1	Isoform of Q9NP97. Dynein light chain roadblock-type 1;Dynein light chain roadblock-type 1	16.1617	16.131	16.1523	16.7122	16.3023	16.2782	16.3821	16.1062	15.9438	15.8564	16.263	16.0167	15.783	16.1415	15.6274	16.141		1.50988	0.156238	-0.306654	-2.69389
A6NGJ0;P51808	DYNLT3	Isoform of P51808. Dynein light chain Tctex-type 3;Dynein light chain Tctex-type 3	11.5538	10.5299	13.4184	12.715	13.4798	13.05	11.1052	12.5464	12.0324	12.8709	11.9723	13.0849	11.9441	11.7709	12.5165	12.9554		0.0670749	0.931823	0.0936196	0.1871
O75923-10;O75923-14;O75923-8	DYSF	Isoform of O75923. Isoform 10 of Dysferlin;Isoform of O75923. Isoform 14 of Dysferlin;Isoform of O75923. Isoform 8 of Dysferlin	16.9795	16.3288	16.5644	16.5086	16.7514	16.493	16.4783	16.4554	16.4646	16.1656	16.3049	16.1369	16.372	16.3435	16.5752	16.2446		2.12679	0.0694798	-0.244015	-3.71878
H3BTB7;Q5JPH6;Q5JPH6-2	EARS2	Isoform of Q5JPH6. Probable glutamate--tRNA ligase. mitochondrial;Probable glutamate--tRNA ligase. mitochondrial;Isoform of Q5JPH6. Isoform 2 of Probable glutamate--tRNA ligase. mitochondrial	12.0897	11.2649	11.7612	11.4656	11.5824	9.54492	11.4199	11.9608	12.384	11.9314	12.1377	12.231	11.592	10.1078	12.1576	11.0429		0.800624	0.393092	0.311892	1.57937
Q13011	ECH1	Delta(3.5)-Delta(2.4)-dienoyl-CoA isomerase. mitochondrial	19.9196	19.9829	19.9465	19.123	18.9188	19.4844	19.3558	19.7128	20.3199	20.132	19.7483	20.5683	19.6444	19.1157	20.1078	19.7134		0.892186	0.348746	0.363234	1.72501
Q9NTX5;Q9NTX5-2;Q9NTX5-6	ECHDC1	Ethylmalonyl-CoA decarboxylase;Isoform of Q9NTX5. Isoform 2 of Ethylmalonyl-CoA decarboxylase;Isoform of Q9NTX5. Isoform 6 of Ethylmalonyl-CoA decarboxylase	14.4837	14.2273	14.1525	13.9008	13.6162	14.1324	13.8245	14.2896	14.7413	13.8463	14.6906	15.2632	14.9876	14.8719	13.757	14.5878		1.27236	0.215051	0.514809	2.31978
Q86YB7;Q86YB7-2	ECHDC2	Enoyl-CoA hydratase domain-containing protein 2. mitochondrial;Isoform of Q86YB7. Isoform 2 of Enoyl-CoA hydratase domain-containing protein 2. mitochondrial	15.0452	15.3548	14.5504	14.3756	13.9921	14.848	14.4689	14.6446	14.5314	14.5978	14.3293	14.4698	14.3653	14.8278	14.7668	14.7894		0.216224	0.802124	-0.0752399	-0.537127
Q96DC8	ECHDC3	Enoyl-CoA hydratase domain-containing protein 3. mitochondrial	15.0546	16.9772	15.8908	14.9706	15.2248	15.879	15.358	14.6678	15.4446	15.4959	15.929	15.6985	15.6177	14.9243	15.1366	15.5514		0.033412	0.965337	-0.0281078	-0.0963397
P30084	ECHS1	Enoyl-CoA hydratase. mitochondrial	19.3528	19.4202	19.9891	19.1009	19.1275	19.5258	19.0608	19.163	19.6891	19.5511	19.6707	19.7946	19.3408	19.0645	19.191	19.4939		0.460081	0.604007	0.131958	1.00878
P42126;P42126-2	ECI1	Enoyl-CoA delta isomerase 1. mitochondrial;Isoform of P42126. Isoform 2 of Enoyl-CoA delta isomerase 1. mitochondrial	20.0233	20.019	19.9318	19.3889	19.0737	19.7154	19.3364	19.9543	20.2738	19.9656	19.7229	19.7485	19.5807	19.9849	19.6485	19.6349		0.651029	0.486725	0.139635	1.33601
A0A0C4DGA2;O75521;O75521-2	ECI2	Isoform of O75521. Enoyl-CoA delta isomerase 2. mitochondrial;Enoyl-CoA delta isomerase 2. mitochondrial;Isoform of O75521. Isoform 2 of Enoyl-CoA delta isomerase 2. mitochondrial	16.8699	16.5054	16.7664	16.4754	16.329	16.8098	16.576	16.818	17.2176	17.035	16.9869	16.9859	16.9669	16.3477	16.9965	16.9856		1.34399	0.19668	0.296527	2.43195
Q16610;Q16610-2;Q16610-4	ECM1	Extracellular matrix protein 1;Isoform of Q16610. Isoform 2 of Extracellular matrix protein 1;Isoform of Q16610. Isoform 4 of Extracellular matrix protein 1	10.7334	11.3687	10.0967	13.3538	10.3718	13.1747	10.4997	10.921	14.1167	13.005	10.7827	13.5436	13.2903	14.926	13.7761	12.8504	+	2.68908	0.0368947	1.97134	4.76563
Q5VYK3	ECM29	Proteasome-associated protein ECM29 homolog	13.8005	9.63892	16.2116	13.4137	16.5618	17.4389	13.6009	12.8352	13.3191	12.5994	12.9468	12.0836	13.3921	10.9811	13.6965	13.1753		0.688097	0.461115	-1.41345	-1.39711
Q9BQ95	ECSIT	Evolutionarily conserved signaling intermediate in Toll pathway. mitochondrial	12.5214	11.4603	19.8559	19.7267	12.8413	14.5445	19.6931	20.0871	19.5975	19.4297	13.0048	19.4828	19.1086	11.6106	18.8592	20.8687		0.323046	0.704265	1.40392	0.754279
O60869;O60869-2;O60869-3	EDF1	Endothelial differentiation-related factor 1;Isoform of O60869. Isoform 2 of Endothelial differentiation-related factor 1;Isoform of O60869. Isoform 3 of Endothelial differentiation-related factor 1	16.7113	16.8682	16.9553	16.7711	17.127	17.0072	16.5202	16.5455	16.8706	16.8499	16.1977	17.1402	17.1668	17.7193	16.6116	16.5559		0.206393	0.809631	0.0757561	0.516017
Q15075	EEA1	Early endosome antigen 1	13.651	13.3239	13.6446	13.0181	13.7585	13.4376	13.4417	13.1372	13.2999	13.4989	12.8217	13.3076	13.8831	14.4981	13.7368	13.6195		0.343773	0.68802	0.156649	0.794243
P68104	EEF1A1	Elongation factor 1-alpha 1	21.1738	21.2388	21.4239	21.1111	21.6764	21.6289	21.2877	21.275	21.6864	21.5519	21.2798	21.672	22.036	21.5742	21.6439	21.868		1.83076	0.101375	0.312095	3.21452
Q05639	EEF1A2	Elongation factor 1-alpha 2	18.5675	17.9679	18.7224	18.9404	18.791	19.1385	17.7783	18.0488	18.5191	19.2744	17.794	18.6775	18.7237	17.9277	18.0101	18.3215		0.121585	0.889601	-0.0883284	-0.323436
P24534	EEF1B2	Elongation factor 1-beta	18.5549	18.7122	18.922	18.6847	18.6399	18.7793	18.2175	18.3965	18.8084	18.4678	18.2538	18.7875	18.6795	19.3144	18.0892	18.472		0.0115046	0.985641	-0.00428343	-0.0339595
E9PRY8;P29692;P29692-2	EEF1D	Isoform of P29692. Elongation factor 1-delta;Elongation factor 1-delta;Isoform of P29692. Isoform 2 of Elongation factor 1-delta	18.283	18.2103	18.4127	18.4077	18.6121	18.6075	18.088	18.1032	18.6089	18.4136	18.1901	18.2078	18.6199	18.8264	18.3191	18.4869		0.721544	0.43921	0.118529	1.45175
C9J1V9;D6RBD7;O43324;O43324-2	EEF1E1-BLOC1S5;EEF1E1;EEF1E1;EEF1E1	EEF1E1-BLOC1S5 readthrough (NMD candidate);Isoform of O43324. Eukaryotic translation elongation factor 1 epsilon-1;Eukaryotic translation elongation factor 1 epsilon-1;Isoform of O43324. Isoform 2 of Eukaryotic translation elongation factor 1 epsilon-1	11.0871	10.5502	11.0505	11.4682	11.1364	10.9217	11.4158	11.7599	11.5956	11.5704	12.0531	11.6462	11.8701	11.986	12.0747	12.3748	+	3.57667	0.0233333	0.722648	6.74983
P26641	EEF1G	Elongation factor 1-gamma	17.0653	16.9094	17.1178	17.1949	17.5411	16.9815	16.6302	17.1368	17.1549	16.9658	16.9273	17.0872	17.4238	16.8988	17.3588	17.0322		0.122218	0.889195	0.0339782	0.324953
P13639	EEF2	Elongation factor 2	19.0729	19.1246	19.3788	19.1507	19.4229	19.0982	19.1252	19.1673	19.2192	19.3445	19.1319	19.3018	19.4429	19.0374	19.0176	19.1273		0.066776	0.932138	0.0102646	0.186318
O00418	EEF2K	Eukaryotic elongation factor 2 kinase	13.7388	13.6589	12.5681	13.5959	13.9491	13.7454	13.3833	13.9602	13.6906	13.7628	13.4917	13.0748	13.979	13.4887	10.0284	13.913		0.392544	0.647274	-0.396348	-0.886047
A4FU69;A4FU69-2;A4FU69-3;A4FU69-4;A4FU69-5;A4FU69-6;H0Y843;K7EJC3	EFCAB5	EF-hand calcium-binding domain-containing protein 5;Isoform of A4FU69. Isoform 2 of EF-hand calcium-binding domain-containing protein 5;Isoform of A4FU69. Isoform 3 of EF-hand calcium-binding domain-containing protein 5;Isoform of A4FU69. Isoform 4 of EF-hand calcium-binding domain-containing protein 5;Isoform of A4FU69. Isoform 5 of EF-hand calcium-binding domain-containing protein 5;Isoform of …	15.3104	14.9263	15.2577	15.2398	15.0169	15.0188	14.8999	14.7786	15.2094	14.8921	14.8151	14.8167	14.8186	14.3661	14.6613	14.7408		1.93885	0.0841732	-0.266048	-3.39556
Q12805;Q12805-2;Q12805-3;Q12805-4	EFEMP1	EGF-containing fibulin-like extracellular matrix protein 1;Isoform of Q12805. Isoform 2 of EGF-containing fibulin-like extracellular matrix protein 1;Isoform of Q12805. Isoform 3 of EGF-containing fibulin-like extracellular matrix protein 1;Isoform of Q12805. Isoform 4 of EGF-containing fibulin-like extracellular matrix protein 1	10.4753	10.0136	13.977	16.6495	14.5265	9.96908	13.2012	9.31565	12.5359	12.6955	12.939	9.02901	12.5473	11.9739	11.4598	12.1519		0.102812	0.905402	-0.349457	-0.277787
Q9BUP0	EFHD1	EF-hand domain-containing protein D1	12.6035	14.231	13.1468	14.1198	13.5778	15.8342	14.074	12.3405	16.2741	15.7795	14.7184	13.213	14.0944	14.3914	13.6365	12.8058		0.497629	0.578368	0.623182	1.07516
Q96C19	EFHD2	EF-hand domain-containing protein D2	13.5084	12.8202	12.732	10.4508	9.19085	13.1315	13.6483	10.0511	13.8073	13.0971	11.4553	13.3128	13.7327	13.9925	13.6927	13.4727		1.03849	0.279146	1.37876	1.95479
Q15029;Q15029-2;Q15029-3	EFTUD2	116 kDa U5 small nuclear ribonucleoprotein component;Isoform of Q15029. Isoform 2 of 116 kDa U5 small nuclear ribonucleoprotein component;Isoform of Q15029. Isoform 3 of 116 kDa U5 small nuclear ribonucleoprotein component	17.4296	17.4637	17.4889	17.3504	17.3097	17.6794	17.4297	17.5954	17.7041	17.5612	17.389	17.4638	17.6553	17.665	17.6618	18.1		1.45568	0.168741	0.181683	2.6079
Q63HQ2-2	EGFLAM	Isoform of Q63HQ2. Isoform 2 of Pikachurin	13.5596	14.5822	13.6171	13.8585	14.1931	13.3834	14.3752	13.697	13.6179	13.6192	13.4083	14.3471	13.6743	13.556	13.9408	13.3376		0.674935	0.471448	-0.220612	-1.37549
Q9GZT9;Q9GZT9-2	EGLN1	Egl nine homolog 1;Isoform of Q9GZT9. Isoform 2 of Egl nine homolog 1	14.5677	14.7305	14.4232	13.2837	14.2452	15.2485	14.5735	14.228	14.4948	13.876	14.8941	14.2721	14.3919	14.0542	14.1345	14.6386		0.0973883	0.909511	-0.0680096	-0.264357
Q8N3D4	EHBP1L1	EH domain-binding protein 1-like protein 1	13.2309	13.8582	13.3448	13.3053	13.6183	13.4436	13.339	13.1214	13.6069	13.3886	13.0603	13.3812	13.6167	13.4919	13.417	13.8288		0.206403	0.809954	0.0662254	0.516038
A0A024R571;Q9H4M9	EHD1	Isoform of Q9H4M9. EH domain-containing protein 1;EH domain-containing protein 1	15.5335	15.625	15.2379	14.9664	15.1812	15.2205	15.1174	15.157	15.4345	15.1857	15.1583	14.5826	15.4275	14.9967	15.1796	15.2452		0.591753	0.524139	-0.103607	-1.23691
Q9NZN4	EHD2	EH domain-containing protein 2	17.7756	17.7909	17.9682	17.5797	17.6323	17.7529	17.5911	17.7147	17.9123	17.621	17.4902	17.6834	17.7033	17.3066	17.8341	17.7037		0.30544	0.717728	-0.0688479	-0.719842
Q9H223	EHD4	EH domain-containing protein 4	14.3398	15.791	14.7858	11.2466	14.7425	14.1115	13.3054	13.2325	14.4233	14.678	13.4897	14.7869	14.0296	14.0402	14.087	14.0538		0.183005	0.828024	0.254175	0.464872
K7EM18;P41567	EIF1	Isoform of P41567. Eukaryotic translation initiation factor 1;Eukaryotic translation initiation factor 1	16.4832	16.2904	16.3104	16.1229	16.3347	16.1078	16.0487	15.7929	16.2416	16.5009	15.9859	16.3562	16.3297	16.2704	16.0926	15.8379		0.0779642	0.921876	0.0155172	0.2153
A6NJH9;O14602	EIF1AY	Isoform of O14602. Eukaryotic translation initiation factor 1A. Y-chromosomal;Eukaryotic translation initiation factor 1A. Y-chromosomal	14.728	14.9832	15.2404	15.0643	15.1293	14.6021	13.7244	14.7242	14.9339	15.0513	13.9415	15.1812	14.5389	14.723	14.014	14.8795		0.246307	0.770577	-0.116555	-0.600429
F8WAE5;Q9BY44;Q9BY44-3	EIF2A	Isoform of Q9BY44. Eukaryotic translation initiation factor 2A;Eukaryotic translation initiation factor 2A;Isoform of Q9BY44. Isoform 3 of Eukaryotic translation initiation factor 2A	14.583	14.997	13.825	13.8304	14.161	14.2214	15.1239	14.9226	14.943	14.84	14.8819	13.0594	15.1379	15.543	14.7506	15.1825		0.611367	0.508805	0.334251	1.26991
Q14232	EIF2B1	Translation initiation factor eIF-2B subunit alpha	10.3731	9.42603	10.2515	10.6621	10.6263	13.1936	12.8432	10.6482	10.2908	11.3518	10.9261	11.1772	10.8517	13.1489	11.7853	11.5372		0.596198	0.522137	0.380621	1.24441
G3V5E5;H0YJJ8;P49770	EIF2B2	Isoform of P49770. Translation initiation factor eIF-2B subunit beta;Isoform of P49770. Translation initiation factor eIF-2B subunit beta (Fragment);Translation initiation factor eIF-2B subunit beta	10.4926	11.9304	10.772	10.2583	11.0178	10.3594	13.545	11.0169	11.2103	11.1395	13.5586	11.4786	11.5061	10.6488	11.0116	13.3863		0.425903	0.623607	0.568416	0.947248
Q9NR50;Q9NR50-2;Q9NR50-3	EIF2B3	Translation initiation factor eIF-2B subunit gamma;Isoform of Q9NR50. Isoform 2 of Translation initiation factor eIF-2B subunit gamma;Isoform of Q9NR50. Isoform 3 of Translation initiation factor eIF-2B subunit gamma	17.7005	15.2418	16.0915	16.1704	16.0615	16.1318	16.0368	15.862	16.2136	16.0338	15.3465	15.1311	16.2065	16.312	15.7656	16.4051		0.364879	0.668709	-0.235259	-0.834337
A0A087WTA5;Q9UI10-2;Q9UI10-3	EIF2B4	Isoform of Q9UI10. Translation initiation factor eIF-2B subunit delta;Isoform of Q9UI10. Isoform 2 of Translation initiation factor eIF-2B subunit delta;Isoform of Q9UI10. Isoform 3 of Translation initiation factor eIF-2B subunit delta	10.6267	11.4153	12.9374	13.3383	10.6812	11.8707	10.996	12.713	12.4713	12.7624	12.9029	12.4584	12.6072	9.12498	10.9916	12.612		0.114569	0.896382	0.168998	0.306523
Q13144	EIF2B5	Translation initiation factor eIF-2B subunit epsilon	10.3574	11.4712	13.2932	12.3353	9.885	11.7942	10.8251	10.1623	13.71	13.7343	12.503	12.843	13.5682	9.82819	11.5546	13.8943		0.995097	0.299653	1.43899	1.8869
P05198	EIF2S1	Eukaryotic translation initiation factor 2 subunit 1	15.2932	15.4336	15.1173	14.1962	15.2786	15.3202	15.1632	15.4151	15.6571	15.2825	15.0911	15.0439	15.5046	15.5981	15.6429	15.6834		1.48177	0.164472	0.285774	2.64923
P20042	EIF2S2	Eukaryotic translation initiation factor 2 subunit 2	14.6817	14.7282	14.9053	14.4029	15.2342	15.0623	14.2341	14.4392	14.9765	14.7589	14.4419	14.621	14.7424	15.1511	14.4741	14.6518		0.0511892	0.949649	0.0162165	0.144979
P41091	EIF2S3	Eukaryotic translation initiation factor 2 subunit 3	16.1796	15.8633	15.1662	16.0358	15.9196	14.7899	14.7892	14.7696	15.0795	14.9148	14.8925	15.5778	14.6075	15.425	14.2963	14.9986		1.05602	0.273789	-0.465175	-1.98218
Q14152	EIF3A	Eukaryotic translation initiation factor 3 subunit A	14.0388	13.3003	14.2567	13.9704	13.7775	18.067	13.1977	13.6138	13.5341	14.3889	13.9298	14.8028	13.7002	13.8436	13.5273	13.4765		0.268853	0.748955	-0.377386	-0.646688
P55884;P55884-2	EIF3B	Eukaryotic translation initiation factor 3 subunit B;Isoform of P55884. Isoform 2 of Eukaryotic translation initiation factor 3 subunit B	14.2315	14.3115	14.6729	13.9149	14.6345	14.4439	13.7059	14.1682	14.3197	14.4907	14.0677	14.5866	14.5484	14.5326	14.7482	14.6509		0.637132	0.492688	0.232684	1.31294
Q99613;Q99613-2	EIF3C	Eukaryotic translation initiation factor 3 subunit C;Isoform of Q99613. Isoform 2 of Eukaryotic translation initiation factor 3 subunit C	12.4857	13.9123	14.7447	14.2542	12.7954	14.0909	14.1326	13.1198	13.4835	13.2549	12.7162	13.3047	12.7877	13.8583	13.7631	13.9065		0.40176	0.639675	-0.307588	-0.903076
O15371;O15371-2;O15371-3	EIF3D	Eukaryotic translation initiation factor 3 subunit D;Isoform of O15371. Isoform 2 of Eukaryotic translation initiation factor 3 subunit D;Isoform of O15371. Isoform 3 of Eukaryotic translation initiation factor 3 subunit D	13.9039	13.2224	13.4786	13.0284	13.4661	12.9059	16.3663	12.9287	13.2806	13.3177	13.0627	13.026	13.5528	12.4499	13.9872	13.495		0.595306	0.522398	-0.391049	-1.2429
P60228	EIF3E	Eukaryotic translation initiation factor 3 subunit E	13.6139	13.0161	9.55156	10.0532	12.5021	11.3661	13.4212	13.2195	13.5291	13.2403	13.241	13.3394	11.7896	14.2649	13.8218	12.6474		0.916692	0.335987	1.14124	1.7637
O00303	EIF3F	Eukaryotic translation initiation factor 3 subunit F	13.5804	14.7275	14.6756	14.3252	14.7364	14.2833	13.7933	14.0986	14.3397	14.2914	14.269	14.5092	14.4402	14.629	14.2788	14.2564		0.26444	0.750747	0.0991939	0.637707
O75821	EIF3G	Eukaryotic translation initiation factor 3 subunit G	14.5428	14.2456	14.6095	13.9387	14.5629	14.3458	14.5479	14.3313	15.6668	14.7916	14.5991	13.8437	14.6062	15.1218	14.4947	15.1275		1.27263	0.215361	0.390881	2.32019
A0A087WZK9;B3KS98;O15372	EIF3H;EIF3S3;EIF3H	Isoform of O15372. Eukaryotic translation initiation factor 3 subunit H;Isoform of O15372. Eukaryotic translation initiation factor 3 subunit H;Eukaryotic translation initiation factor 3 subunit H	15.0419	15.3803	14.4941	14.2138	15.0811	15.0279	14.9754	14.9998	14.6898	15.3162	14.5281	14.8547	14.5149	14.1807	15.6304	14.7223		0.204904	0.811412	-0.0971293	-0.5128
Q13347	EIF3I	Eukaryotic translation initiation factor 3 subunit I	12.0088	12.3251	14.0742	12.4342	12.8726	13.0119	10.6192	12.2	11.0033	12.9184	10.7778	13.3477	12.7069	10.9442	13.3049	13.2854		0.0847587	0.916818	-0.157169	-0.232636
O75822	EIF3J	Eukaryotic translation initiation factor 3 subunit J	16.5853	17.4103	16.4239	16.8893	16.7543	16.9318	16.6905	16.726	16.7384	16.9277	16.4418	16.5369	17.0506	17.155	17.1285	17.0131		0.259231	0.756715	0.0725935	0.627062
K7ERF1;Q9UBQ5	EIF3K	Isoform of Q9UBQ5. Eukaryotic translation initiation factor 3 subunit K;Eukaryotic translation initiation factor 3 subunit K	15.7287	15.6396	15.4783	15.413	15.1923	15.3581	15.923	15.071	15.5179	16.6603	15.3519	16.4342	15.3456	15.1161	15.7085	15.3322		0.512348	0.568362	0.20784	1.10087
B0QY89;Q9Y262;Q9Y262-2	EIF3L	Isoform of Q9Y262. Eukaryotic translation initiation factor 3 subunit L;Eukaryotic translation initiation factor 3 subunit L;Isoform of Q9Y262. Isoform 2 of Eukaryotic translation initiation factor 3 subunit L	13.8962	10.3476	14.8138	14.5302	14.3044	14.6005	14.37	14.6001	13.7368	13.8109	13.2437	13.1785	13.4728	13.4139	15.2875	14.1149		0.0941401	0.912052	-0.150472	-0.256259
Q7L2H7	EIF3M	Eukaryotic translation initiation factor 3 subunit M	14.7303	13.3991	15.1653	15.3295	15.5827	15.7542	14.5539	14.8143	13.6418	14.0487	14.5956	13.7924	13.6411	13.0516	14.6557	14.3826		1.33206	0.198543	-0.939977	-2.41324
P60842	EIF4A1	Eukaryotic initiation factor 4A-I	13.5076	14.1381	13.3865	13.3864	13.3837	13.3332	13.0621	13.3136	13.8883	13.4905	13.9847	12.3795	13.2605	13.9757	13.7121	13.7646		0.208649	0.80914	0.118091	0.52088
Q14240	EIF4A2	Eukaryotic initiation factor 4A-II	16.4362	16.7889	16.8909	16.5866	17.021	16.97	16.8042	16.4416	16.8248	16.873	16.1164	16.9453	17.128	16	16.5867	16.851		0.1567	0.854322	-0.0767924	-0.405656
P38919	EIF4A3	Eukaryotic initiation factor 4A-III	14.091	15.1184	14.4836	13.9059	14.0023	13.929	14.2816	13.8539	14.5997	14.0885	14.2184	14.0499	14.143	14.5329	13.873	14.2489		0.0194606	0.980486	0.0110726	0.0569462
E7EX17;P23588	EIF4B	Isoform of P23588. Eukaryotic translation initiation factor 4B;Eukaryotic translation initiation factor 4B	16.6533	16.7471	17.2611	16.7957	17.2911	17.0883	16.4857	16.3964	16.9516	16.5613	16.3527	17.1663	16.9675	17.943	16.7694	16.7271		0.185749	0.827021	0.0900254	0.470942
P06730;P06730-2	EIF4E	Eukaryotic translation initiation factor 4E;Isoform of P06730. Isoform 2 of Eukaryotic translation initiation factor 4E	13.7597	13.8656	12.8025	13.8014	15.6333	13.5299	13.6499	13.6567	13.8557	13.219	13.742	14.1126	13.5561	13.7908	13.5873	13.5431		0.204111	0.810689	-0.161584	-0.511085
Q13541	EIF4EBP1	Eukaryotic translation initiation factor 4E-binding protein 1	16.3762	16.2009	16.6614	16.4923	16.4575	16.7558	16.2807	15.8555	16.3526	16.5325	16.1424	16.4473	16.1094	16.9764	15.8711	15.872		0.402705	0.639373	-0.0970696	-0.904817
Q13542	EIF4EBP2	Eukaryotic translation initiation factor 4E-binding protein 2	15.4448	15.4258	15.3728	14.3818	15.1847	15.3161	14.995	14.7268	15.5988	15.2732	14.6361	15.5223	15.6809	15.5018	14.9809	15.3843		0.502744	0.575175	0.216308	1.08411
O60516	EIF4EBP3	Eukaryotic translation initiation factor 4E-binding protein 3	13.8173	10.0819	11.5752	13.029	10.0537	9.83379	11.2382	11.1552	14.2469	14.8125	13.1136	10.4032	8.46624	14.1353	10.5391	9.55439		0.23385	0.781314	0.560851	0.574445
E7EUU4;E7EX73;E9PGM1;Q04637-8	EIF4G1	Isoform of Q04637. Eukaryotic translation initiation factor 4 gamma 1;Isoform of Q04637. Eukaryotic translation initiation factor 4 gamma 1;Isoform of Q04637. Eukaryotic translation initiation factor 4 gamma 1;Isoform of Q04637. Isoform 8 of Eukaryotic translation initiation factor 4 gamma 1	14.8177	14.7942	15.2177	15.2634	15.4163	15.0644	14.8835	14.712	14.9121	15.2283	14.5927	15.2226	15.1989	14.795	14.8125	15.1717		0.0835736	0.918083	-0.0294174	-0.229626
P78344;P78344-2	EIF4G2	Eukaryotic translation initiation factor 4 gamma 2;Isoform of P78344. Isoform 2 of Eukaryotic translation initiation factor 4 gamma 2	13.8549	13.354	14.1741	14.0631	13.6503	10.8402	12.578	13.1928	13.2135	13.4085	12.3737	13.3195	12.8448	11.0362	12.8735	13.1766		0.897758	0.347146	-0.432587	-1.73382
Q15056;Q15056-2	EIF4H	Eukaryotic translation initiation factor 4H;Isoform of Q15056. Isoform Short of Eukaryotic translation initiation factor 4H	17.4269	17.5592	17.634	17.2307	17.6687	17.5233	17.2456	16.9944	17.2587	17.1261	17.2624	17.4467	17.5207	18.1287	17.386	16.9046		0.0950964	0.910313	-0.0310893	-0.258647
P55010	EIF5	Eukaryotic translation initiation factor 5	14.429	14.7228	15.0187	14.9822	15.0736	15.29	14.8547	15.3495	15.0413	15.1316	15.2758	15.2338	15.5722	15.6416	15.5565	15.7182	+	3.87179	0.0208	0.431296	7.52596
I3L397;I3L504;P63241;P63241-2	EIF5A	Isoform of P63241. Eukaryotic translation initiation factor 5A (Fragment);Isoform of P63241. Eukaryotic translation initiation factor 5A-1;Eukaryotic translation initiation factor 5A-1;Isoform of P63241. Isoform 2 of Eukaryotic translation initiation factor 5A-1	18.6909	18.6362	18.7825	19.0308	18.9733	18.9945	18.8125	18.8648	19.0237	18.7293	18.8334	18.9853	19.2409	19.3238	19.108	19.2699		2.16781	0.0656933	0.216056	3.79089
A0A087WUT6;O60841	EIF5B	Isoform of O60841. Eukaryotic translation initiation factor 5B;Eukaryotic translation initiation factor 5B	13.1424	11.7992	12.4711	11.9567	13.1737	13.5725	12.8298	13.205	13.4927	13.3945	12.9951	13.2653	13.3969	14.1874	13.2463	13.4565		2.09041	0.0708634	0.660551	3.6553
P56537	EIF6	Eukaryotic translation initiation factor 6	15.0131	15.3117	15.8395	15.8028	15.9372	15.926	15.5425	14.3404	15.5662	15.4577	15.7773	15.5464	16.348	15.4469	15.3659	15.5307		0.384966	0.655578	0.165747	0.871974
A8MUM1;C9JVR6;Q53HC9	EIPR1	Isoform of Q53HC9. EARP-interacting protein;Isoform of Q53HC9. EARP-interacting protein (Fragment);EARP-interacting protein	10.6671	12.2302	10.2041	11.1533	11.5898	11.4326	11.6136	10.8912	11.1957	11.4237	11.5792	10.4314	11.0338	11.1758	11.2657	8.88796		0.452143	0.607298	-0.348587	-0.994586
Q15717;Q15717-2	ELAVL1	ELAV-like protein 1;Isoform of Q15717. Isoform 2 of ELAV-like protein 1	14.181	14.8066	14.7656	13.6122	13.9756	13.772	13.4897	14.3273	13.6914	13.9521	13.8103	13.5568	13.8718	13.831	14.1917	13.4293		0.801941	0.392414	-0.324436	-1.58148
D6RBS5;Q8IZ81	ELMOD2	Isoform of Q8IZ81. ELMO domain-containing protein 2 (Fragment);ELMO domain-containing protein 2	12.2008	12.0551	12.1435	10.1021	10.2158	11.5752	9.67405	11.0923	11.1637	11.2835	11.3079	9.27897	11.5206	9.65208	11.9585	11.5563		0.127892	0.882957	-0.16717	-0.338495
B8ZZU8;Q15370	ELOB	Isoform of Q15370. Elongin-B;Elongin-B	17.9899	18.0826	17.9921	18.0203	18.0418	18.1498	17.7893	17.9867	18.0659	17.9502	17.6511	17.6543	18.1654	17.915	17.9529	17.9982		0.555792	0.544833	-0.0874343	-1.17582
E5RHG8;Q15369	ELOC	Isoform of Q15369. Elongin-C (Fragment);Elongin-C	16.6085	16.9597	16.7528	16.7682	16.7223	16.8372	16.81	16.3329	16.5135	16.6944	16.6198	16.6973	16.0827	16.696	16.8838	16.5937		0.670742	0.473926	-0.126304	-1.36858
F5H2T0;O95163	ELP1	Isoform of O95163. Elongator complex protein 1;Elongator complex protein 1	17.8537	17.2633	18.1781	12.0644	18.4025	17.845	18.0262	18.2446	18.47	18.2492	17.8153	18.2687	18.4987	18.1978	18.1133	18.5064		0.671207	0.473734	1.0302	1.36935
Q8N766;Q8N766-2;Q8N766-3;Q8N766-4	EMC1	ER membrane protein complex subunit 1;Isoform of Q8N766. Isoform 2 of ER membrane protein complex subunit 1;Isoform of Q8N766. Isoform 3 of ER membrane protein complex subunit 1;Isoform of Q8N766. Isoform 4 of ER membrane protein complex subunit 1	15.1855	15.8035	16.063	17.2146	16.6517	16.2007	15.8991	16.4048	16.5042	16.5031	15.0326	16.0551	16.6587	15.8908	14.407	15.8931		0.407041	0.63772	-0.309802	-0.912791
Q15006	EMC2	ER membrane protein complex subunit 2	10.7114	11.09	12.2796	11.9386	12.2697	9.9567	12.2369	11.2005	11.7212	12.9671	12.2416	10.5976	10.1973	11.9215	11.7257	13.496		0.289261	0.734226	0.398086	0.687769
H0YDT8;Q9NPA0	EMC7	Isoform of Q9NPA0. ER membrane protein complex subunit 7 (Fragment);ER membrane protein complex subunit 7	12.8682	9.14684	11.8898	9.14034	9.02307	12.5648	8.84385	11.3204	12.3546	11.7734	12.459	12.9598	10.2847	10.5094	13.0909	11.9302		0.900104	0.34635	1.32059	1.73752
O43402;O43402-2	EMC8	ER membrane protein complex subunit 8;Isoform of O43402. Isoform 2 of ER membrane protein complex subunit 8	13.6174	13.216	13.2309	10.4282	13.7757	12.9298	12.9842	12.8372	13.1894	13.2347	12.9197	13.165	13.1973	13.4234	13.5772	13.0874		0.41603	0.632171	0.346816	0.929258
Q9ULC0;Q9ULC0-3	EMCN	Endomucin;Isoform of Q9ULC0. Isoform 3 of Endomucin	14.1256	13.1433	14.3996	13.5186	14.1772	14.2136	13.727	13.836	14.6249	14.1704	13.8301	14.2699	14.2345	15.3338	14.2284	14.5156		1.46763	0.167121	0.508319	2.62681
P50402	EMD	Emerin	16.0191	15.9178	16.4037	16.0422	16.4102	16.5764	15.9864	15.9651	16.4207	16.3938	15.5005	16.5494	16.8564	17.4415	16.6077	16.673		1.08437	0.264887	0.390263	2.02644
Q9Y6C2	EMILIN1	EMILIN-1	13.4763	13.6538	13.5824	13.9308	13.9626	12.3532	13.4514	13.6525	13.575	12.8321	11.5314	12.9433	13.9097	13.7798	14.1726	12.7724		0.358614	0.67359	-0.318335	-0.822496
F8W717;O00423;O00423-3	EML1	Isoform of O00423. Echinoderm microtubule-associated protein-like 1;Echinoderm microtubule-associated protein-like 1;Isoform of O00423. Isoform 3 of Echinoderm microtubule-associated protein-like 1	14.067	14.4566	14.3137	12.3882	13.8179	14.1794	13.9412	13.7396	13.7749	13.3096	13.3691	13.8988	14.0274	13.516	13.9113	13.9788		0.185063	0.826799	-0.139721	-0.469427
A0A0C4DGQ7;C9JRL6;K7EIK7;O95834;O95834-2;O95834-3	EML2	Isoform of O95834. Echinoderm microtubule-associated protein-like 2;Isoform of O95834. Echinoderm microtubule-associated protein-like 2;Isoform of O95834. Echinoderm microtubule-associated protein-like 2;Echinoderm microtubule-associated protein-like 2;Isoform of O95834. Isoform 2 of Echinoderm microtubule-associated protein-like 2;Isoform of O95834. Isoform 3 of Echinoderm microtubule-associated…	14.5709	15.1894	14.7994	14.1471	12.9202	14.0289	13.8658	13.9187	11.6731	14.0786	14.1802	12.9014	14.1184	13.6249	8.99533	13.3722		1.08609	0.264578	-1.31206	-2.02913
B5MBZ0;Q9HC35;Q9HC35-2	EML4	Isoform of Q9HC35. Echinoderm microtubule-associated protein-like 4;Echinoderm microtubule-associated protein-like 4;Isoform of Q9HC35. Isoform 2 of Echinoderm microtubule-associated protein-like 4	17.5343	16.8899	17.7378	17.6548	17.9858	17.6268	17.0827	17.1552	17.9214	17.7806	16.6369	18.2897	17.9543	18.4262	17.2817	17.6667		0.61162	0.508687	0.28628	1.27034
A0A0U1RRM6;Q8N8S7;Q8N8S7-2;Q8N8S7-3	ENAH	Isoform of Q8N8S7. Protein enabled homolog;Protein enabled homolog;Isoform of Q8N8S7. Isoform 2 of Protein enabled homolog;Isoform of Q8N8S7. Isoform 3 of Protein enabled homolog	12.9728	11.1527	12.4297	15.0429	14.5845	9.72305	12.6092	11.5681	10.5087	13.9687	15.4538	11.9514	13.2231	14.0662	13.9465	14.7573		0.432318	0.618235	0.974083	0.958883
O94919	ENDOD1	Endonuclease domain-containing 1 protein	16.2139	16.4918	16.576	16.4701	17.0253	16.4949	16.6238	16.331	16.2261	16.3282	16.4393	16.7109	16.775	16.4581	16.3511	16.2209		0.775921	0.405525	-0.0896332	-1.53971
Q14249	ENDOG	Endonuclease G. mitochondrial	17.1034	16.7427	16.206	16.7745	16.5582	17.2528	15.8707	16.8939	17.491	17.1274	17.0676	16.8167	17.3189	16.9528	16.9657	17.3804		1.65126	0.129057	0.464801	2.92056
P06733	ENO1	Alpha-enolase	18.7348	18.9755	19.2951	19.0489	19.4327	19.2165	18.9094	18.8211	18.5499	18.8613	18.3932	19.2693	19.0123	18.4873	18.6706	18.9666		1.06948	0.268748	-0.277919	-2.0032
P09104;P09104-2	ENO2	Gamma-enolase;Isoform of P09104. Isoform 2 of Gamma-enolase	18.6559	19.5782	19.3255	19.1052	19.3853	18.9504	18.7225	19.1753	19.1049	19.0666	18.589	19.1781	18.8579	18.9781	18.9989	18.3521		0.623598	0.498441	-0.221577	-1.29038
P13929	ENO3	Beta-enolase	24.7283	24.6309	25.1303	25.0748	25.1079	24.3835	24.8089	24.6057	25.0111	24.8386	24.2754	25.1602	24.968	24.2583	24.4469	24.6291		0.376355	0.661789	-0.110331	-0.8559
A0A087WZY6	ENO4	Isoform of A6NNW6. Enolase 4	13.4738	13.4483	10.4658	10.6909	11.5247	11.1853	13.958	14.1293	13.7976	11.4406	11.1997	13.419	10.5286	13.3288	13.8682	14.3062		0.291113	0.733292	0.376567	0.691462
Q9UHY7	ENOPH1	Enolase-phosphatase E1	15.9365	15.9478	15.8195	15.8614	15.7433	15.926	13.9955	13.8392	15.9443	15.5102	14.1949	15.5959	15.5988	16.1174	14.1388	15.1528		0.134912	0.873396	-0.102014	-0.355101
Q9Y6X5	ENPP4	Bis(5'-adenosyl)-triphosphatase ENPP4	10.6584	10.2117	11.8071	11.8587	10.4506	12.3302	16.7222	10.8894	13.1174	12.4931	10.6118	12.5798	12.6971	12.9317	16.7934	12.4573		1.33331	0.198159	1.0942	2.4152
A0A1W2PRU0;A6NMQ3;O43768;O43768-2;O43768-3;O43768-4;O43768-9;Q5T5H1	ENSA	Isoform of O43768. Alpha-endosulfine;Isoform of O43768. Alpha-endosulfine;Alpha-endosulfine;Isoform of O43768. Isoform 2 of Alpha-endosulfine;Isoform of O43768. Isoform 3 of Alpha-endosulfine;Isoform of O43768. Isoform 4 of Alpha-endosulfine;Isoform of O43768. Isoform 9 of Alpha-endosulfine;Isoform of O43768. Alpha-endosulfine	16.4803	16.637	16.5478	16.3868	16.8016	16.797	16.0718	16.147	16.4703	16.4897	15.9115	16.642	16.886	17.3614	16.5819	16.0626		0.194232	0.820824	0.0670089	0.489591
E5RHX8;Q9NPA8;Q9NPA8-2	ENY2	Isoform of Q9NPA8. Transcription and mRNA export factor ENY2;Transcription and mRNA export factor ENY2;Isoform of Q9NPA8. Isoform 2 of Transcription and mRNA export factor ENY2	10.7483	11.8719	10.3462	13.6988	12.2979	12.7732	10.3937	10.5044	11.7346	10.3855	15.8724	14.1135	13.4147	12.2567	11.7481	11.9162		0.76112	0.412168	1.10094	1.51587
P11171;P11171-2	EPB41	Protein 4.1;Isoform of P11171. Isoform 2 of Protein 4.1	14.8088	14.7736	14.9595	15.2873	14.425	14.3515	13.829	13.4757	13.7444	13.8778	14.0653	14.3805	14.5644	14.0474	14.5903	14.3089		0.4868	0.585737	-0.291418	-1.05614
E9PHY5;O43491	EPB41L2	Isoform of O43491. Band 4.1-like protein 2;Band 4.1-like protein 2	14.3416	14.2827	14.271	14.5846	14.3799	15.0032	14.4736	14.2542	14.5826	14.6231	13.7899	14.0282	15.098	14.8643	14.5613	14.6243		0.184037	0.827275	0.0726007	0.467157
E9PMG5	EPB41L2	Isoform of O43491. Band 4.1-like protein 2 (Fragment)	12.3152	12.0167	13.0579	12.7968	12.9374	13.2564	12.6031	12.6411	13.223	12.6124	11.8082	12.8885	13.0464	12.6949	12.718	12.7859		0.027953	0.974017	0.0190953	0.0810596
A8K968;Q9Y2J2-2	EPB41L3	Isoform of Q9Y2J2. Band 4.1-like protein 3;Isoform of Q9Y2J2. Isoform 2 of Band 4.1-like protein 3	14.8255	12.0386	13.7887	13.265	11.8439	14.5604	13.3419	14.8255	13.7798	13.5802	13.6861	12.9913	13.895	13.9267	14.4952	11.4539		0.0492434	0.953205	-0.0851682	-0.139735
P16452;P16452-2;P16452-3	EPB42	Erythrocyte membrane protein band 4.2;Isoform of P16452. Isoform Long of Erythrocyte membrane protein band 4.2;Isoform of P16452. Isoform 3 of Erythrocyte membrane protein band 4.2	15.7387	15.454	15.3762	16.0045	15.6924	14.8771	14.9788	14.3423	14.509	14.0334	15.0988	15.0288	15.2952	14.3785	15.4165	14.7958		1.04639	0.277783	-0.488523	-1.96714
Q9UM22	EPDR1	Mammalian ependymin-related protein 1	15.917	15.4474	15.547	14.3197	15.646	15.52	15.0987	15.3294	15.9073	15.3074	15.3606	15.5831	15.7252	16.3108	15.7997	15.5197		0.953457	0.317869	0.336085	1.82157
P07099	EPHX1	Epoxide hydrolase 1	15.8856	15.6952	15.9911	15.6379	15.5146	15.3074	15.3415	15.9534	16.1534	15.7122	15.6365	15.5976	15.4289	15.8057	15.8282	16.2886		0.634389	0.493717	0.140553	1.30838
P34913	EPHX2	Bifunctional epoxide hydrolase 2	12.8588	13.1302	14.2851	13.7359	14.3857	13.7349	13.7614	14.4577	13.9262	14.1312	13.397	14.5757	13.9819	13.2778	13.3301	15.0477		0.242663	0.775834	0.164749	0.59286
O95278	EPM2A	Isoform of B3EWF7. Laforin	16.3301	16.2204	16.0781	15.8281	16.4653	16.4614	16.9127	16.0218	16.5021	16.4121	15.9396	16.6056	16.405	16.2913	16.1922	16.6851		0.210941	0.806461	0.0893674	0.525812
Q9Y6I3;Q9Y6I3-1;Q9Y6I3-3	EPN1	Epsin-1;Isoform of Q9Y6I3. Isoform 2 of Epsin-1;Isoform of Q9Y6I3. Isoform 3 of Epsin-1	11.4274	10.4652	13.7446	12.8823	13.6795	14.8513	14.4781	9.81625	14.8537	14.5229	9.43832	14.2869	14.1231	14.9792	13.8123	14.3821		0.508155	0.572193	1.13173	1.09356
P58107	EPPK1	Epiplakin	12.189	12.1825	15.309	15.03	15.1058	10.0847	14.6458	10.3041	14.2783	14.8251	9.53749	15.3233	14.8135	11.2263	11.0319	13.8632		0.0017792	0.997672	0.00601482	0.00530973
P07814	EPRS	Bifunctional glutamate/proline--tRNA ligase	14.2303	14.0977	14.0228	14.1633	14.2583	14.2114	13.7756	13.965	14.544	14.3684	14.2687	14.2392	14.3433	14.0401	14.516	14.5667		1.45697	0.169098	0.270267	2.60994
P42566	EPS15	Epidermal growth factor receptor substrate 15	12.4718	14.2744	12.2626	12.3195	14.0368	13.6167	13.0446	11.9035	12.4562	12.0145	12.2828	13.8318	12.1582	13.73	14.8511	12.524		0.00668932	0.990121	-0.0101311	-0.0198522
Q9UBC2;Q9UBC2-2;Q9UBC2-3	EPS15L1	Epidermal growth factor receptor substrate 15-like 1;Isoform of Q9UBC2. Isoform 2 of Epidermal growth factor receptor substrate 15-like 1;Isoform of Q9UBC2. Isoform 3 of Epidermal growth factor receptor substrate 15-like 1	15.3579	14.6444	14.8903	14.3453	15.085	14.8721	14.5181	14.411	15.0192	14.4174	14.5203	13.9243	14.6239	14.8274	14.6713	14.6259		1.07169	0.268277	-0.186823	-2.00665
Q9NZ08;Q9NZ08-2	ERAP1	Endoplasmic reticulum aminopeptidase 1;Isoform of Q9NZ08. Isoform 2 of Endoplasmic reticulum aminopeptidase 1	11.3229	12.216	13.7734	11.0075	12.5009	13.3077	12.9578	13.9767	12.9622	9.85603	12.1632	12.3023	13.6896	13.6486	12.472	13.7184		0.0211636	0.978845	-0.0312921	-0.0618161
H7C4G9;O15083	ERC2	Isoform of O15083. ERC protein 2 (Fragment);ERC protein 2	15.5266	16.0741	16.5682	14.5237	15.9008	16.8031	15.3275	23.1029	15.3407	14.9804	14.9761	16.0988	15.3714	16.6186	15.421	15.6219		0.584749	0.528785	-1.17476	-1.22507
Q969X5;Q969X5-2	ERGIC1	Endoplasmic reticulum-Golgi intermediate compartment protein 1;Isoform of Q969X5. Isoform 2 of Endoplasmic reticulum-Golgi intermediate compartment protein 1	12.3407	11.0014	12.498	11.4744	12.7836	12.4495	11.8871	12.1627	12.4317	12.603	9.36805	12.7434	12.823	13.1293	12.8499	12.7847		0.204812	0.811295	0.266953	0.5126
P84090	ERH	Enhancer of rudimentary homolog	17.612	17.7753	17.9226	17.5228	17.614	17.9515	17.4527	17.2182	17.7241	17.7335	17.3512	17.3871	17.7121	18.5378	17.7097	17.6087		0.293802	0.730361	0.0868828	0.696814
H0Y4B0;O43414;O43414-2;O43414-3	ERI3	Isoform of O43414. ERI1 exoribonuclease 3 (Fragment);ERI1 exoribonuclease 3;Isoform of O43414. Isoform 2 of ERI1 exoribonuclease 3;Isoform of O43414. Isoform 3 of ERI1 exoribonuclease 3	15.2929	15.1598	13.4457	10.313	13.5755	10.6939	14.1971	14.6095	11.5248	12.7886	15.5624	15.2061	11.5563	11.0978	15.2876	16.1784		0.0876755	0.915944	0.239324	0.240019
E5RHW4;O94905	ERLIN2	Isoform of O94905. Erlin-2 (Fragment);Erlin-2	14.3175	14.1352	13.9727	14.5367	14.2356	14.009	13.9715	14.0306	14.3021	14.3112	14.7821	14.282	13.798	14.8132	14.3584	14.1167		0.575976	0.532687	0.194353	1.21021
Q96HE7	ERO1A	ERO1-like protein alpha	12.92	13.9668	13.0575	13.28	13.1314	12.9907	12.7134	12.5944	12.9244	12.5769	12.4029	13.115	13.1637	13.0002	12.848	13.0555		0.435305	0.61681	-0.19595	-0.964286
P30040	ERP29	Endoplasmic reticulum resident protein 29	15.5412	15.678	15.4018	15.8185	15.1048	15.0927	15.2065	15.4204	15.6024	15.26	14.9965	15.8381	15.2758	15.8965	15.6219	15.4597		0.247776	0.769571	0.0858564	0.603472
Q9BS26	ERP44	Endoplasmic reticulum resident protein 44	13.303	13.6581	13.2879	12.9056	13.0979	12.6912	12.572	11.557	12.7209	12.7082	11.6949	13.0716	13.4116	13.1817	12.9444	13.0175		0.041604	0.957031	-0.0402282	-0.11896
P10768	ESD	S-formylglutathione hydrolase	17.9487	18.0948	18.4172	18.3876	18.1188	18.0847	18.3715	17.8469	17.7485	17.6817	17.9023	17.9998	17.9481	17.9967	18.1	17.5108	+	3.24331	0.022	-0.297779	-5.94825
Q9BSJ8;Q9BSJ8-2	ESYT1	Extended synaptotagmin-1;Isoform of Q9BSJ8. Isoform 2 of Extended synaptotagmin-1	14.2616	13.5705	13.8263	13.4753	13.7098	13.9831	13.9122	14.0301	14.2311	14.2362	14.0433	14.0561	14.2456	14.1197	14.1423	14.658		2.27694	0.0542979	0.370438	3.98573
A0FGR8-2;H7BXI1	ESYT2	Isoform of A0FGR8. Isoform 2 of Extended synaptotagmin-2;Isoform of A0FGR8. Extended synaptotagmin-2 (Fragment)	14.0642	13.5518	13.6436	12.9135	13.3752	13.3319	12.7783	13.5628	13.6914	13.3621	13.3488	13.2397	13.6557	13.8424	14.3521	13.8037		0.5582	0.54406	0.25931	1.17993
B7Z7P8;P62495;P62495-2	ETF1	Isoform of P62495. Eukaryotic peptide chain release factor subunit 1;Eukaryotic peptide chain release factor subunit 1;Isoform of P62495. Isoform 2 of Eukaryotic peptide chain release factor subunit 1	12.1374	11.9023	10.718	11.4073	10.5012	10.2317	10.8001	11.2452	11.6199	12.4633	12.0723	12.6696	12.6784	13.9334	13.3018	12.8613		2.01325	0.0762095	1.58211	3.52216
P13804	ETFA	Electron transfer flavoprotein subunit alpha. mitochondrial	18.73	18.952	18.5542	18.6264	18.5772	18.9347	18.6011	18.6259	18.8346	19.006	18.7846	19.2501	18.7505	18.6962	18.9086	18.8594		1.17084	0.237673	0.186049	2.1613
P38117	ETFB	Electron transfer flavoprotein subunit beta	19.1806	19.2703	19.4808	18.4983	18.5751	19.8361	19.0773	19.4526	19.7102	19.5451	18.9946	19.9025	19.1619	19.5388	19.6886	19.8074		0.941444	0.325019	0.372255	1.80268
Q16134	ETFDH	Electron transfer flavoprotein-ubiquinone oxidoreductase. mitochondrial	18.7351	18.867	18.4911	18.1818	18.1164	18.8704	18.7346	18.6336	19.0091	19.2497	18.3345	18.5888	18.5821	18.276	18.9651	18.961		0.631708	0.49328	0.167031	1.30391
A0A0C4DGJ8;Q6IPR1	ETFRF1	Isoform of Q6IPR1. Electron transfer flavoprotein regulatory factor 1;Electron transfer flavoprotein regulatory factor 1	13.5232	13.3194	13.1146	12.6664	12.2339	12.8773	13.2138	12.6821	14.1157	14.1461	13.7388	13.3445	13.0872	12.7934	13.5133	13.1448	+	2.75152	0.0364706	0.531626	4.89058
O95571	ETHE1	Persulfide dioxygenase ETHE1. mitochondrial	14.9645	15.0081	15.6891	14.7335	15.2337	15.4569	14.9767	15.1228	15.767	15.8008	15.5492	15.8116	15.9149	14.6741	15.2943	15.7833		1.04971	0.276919	0.426214	1.97233
M0R1Y1;Q96CN4;Q96CN4-2	EVI5L	Isoform of Q96CN4. EVI5-like protein (Fragment);EVI5-like protein;Isoform of Q96CN4. Isoform 2 of EVI5-like protein	11.1058	15.3544	13.4274	9.79057	15.0006	15.7981	14.6328	14.6456	14.5474	13.522	13.1711	14.0443	14.9445	15.8323	10.3995	15.0008		0.081146	0.918917	0.213337	0.223443
B0QYK0;Q01844;Q01844-3;Q01844-5;Q01844-6	EWSR1	Isoform of Q01844. RNA-binding protein EWS;RNA-binding protein EWS;Isoform of Q01844. Isoform 3 of RNA-binding protein EWS;Isoform of Q01844. Isoform 5 of RNA-binding protein EWS;Isoform of Q01844. Isoform 6 of RNA-binding protein EWS	16.251	16.4345	16.866	16.3787	16.1107	14.7881	18.8595	16.0305	15.9317	15.7929	15.2602	15.8344	16.49	16.7394	15.8373	15.322		0.518075	0.564491	-0.563903	-1.11083
Q96A65	EXOC4	Exocyst complex component 4	11.6203	12.0192	13.2249	11.3996	12.4122	12.6123	11.4481	8.94426	11.6234	11.1336	11.2692	10.1924	11.7368	10.4663	11.8028	11.1344		0.507063	0.572575	-0.540252	-1.09166
E7ESD5;E9PLN6;F2Z2Y1;O95677;O95677-2;O95677-4;O95677-5	EYA4	Isoform of O95677. Eyes absent homolog;Isoform of O95677. Eyes absent homolog;Isoform of O95677. Eyes absent homolog;Eyes absent homolog 4;Isoform of O95677. Isoform 2 of Eyes absent homolog 4;Isoform of O95677. Isoform 4 of Eyes absent homolog 4;Isoform of O95677. Isoform 5 of Eyes absent homolog 4	9.83231	9.71311	10.6082	10.4021	10.9603	10.826	11.6661	10.4527	12.2981	10.2284	12.0543	10.6219	10.7831	13.1395	10.8881	12.6341		1.27526	0.214839	1.02333	2.32431
E7EQR4;P15311	EZR	Isoform of P15311. Ezrin;Ezrin	14.3545	12.4716	13.1261	13.1111	14.0381	14.1982	12.8725	12.4066	14.5913	13.2749	12.697	13.1991	14.4806	15.0801	14.742	13.9345		1.40512	0.1814	0.677583	2.52806
P00748	F12	Coagulation factor XII	9.93058	10.4227	10.6212	10.6124	12.0383	13.7916	10.9935	10.8635	12.4821	10.672	11.0304	11.3211	10.3381	14.2374	11.4793	11.7679		0.59455	0.523088	0.506815	1.24163
P00488	F13A1	Coagulation factor XIII A chain	13.7034	13.5167	13.1583	13.1516	13.4758	13.5202	13.099	13.0108	13.8171	13.3167	13.1595	13.3691	13.8389	14.8209	13.9448	13.5732		1.27129	0.214386	0.400567	2.3181
P00734	F2	Prothrombin	14.9945	15.0333	15.0051	15.2222	14.2568	14.6211	14.467	12.9638	14.9119	14.6838	14.4093	15.4028	14.2338	14.617	14.7486	14.7293		0.237845	0.778339	0.146562	0.582813
P05413;S4R371	FABP3	Fatty acid-binding protein. heart;Isoform of P05413. Fatty acid-binding protein. heart (Fragment)	20.9434	21.2876	20.74	20.9226	20.8294	21.5857	21.3379	21.4603	21.6031	21.3317	21.308	21.8381	21.2481	21.7605	21.4469	21.6907		2.06697	0.0721675	0.389999	3.61465
P15090	FABP4	Fatty acid-binding protein. adipocyte	16.8464	16.9225	16.758	17.4684	16.9962	17.0976	17.0969	17.6868	17.4383	17.3335	17.3274	17.0532	17.3362	16.8176	17.8535	17.5788		0.749547	0.418911	0.233219	1.49717
Q01469	FABP5	Fatty acid-binding protein. epidermal	17.1774	16.6533	16.4274	16.0655	16.493	17.2194	16.965	16.9697	17.4962	16.4884	16.7758	16.6561	16.8144	17.8336	17.5698	17.1294		2.12244	0.0697241	0.349144	3.71117
Q13158	FADD	FAS-associated death domain protein	9.48168	10.5245	11.0084	10.438	9.78759	10.9132	11.2501	10.8576	11.1041	10.5117	11.0431	11.2564	12.5567	10.8114	11.1292	10.5525		0.766888	0.409002	0.588003	1.52517
Q9UNN5	FAF1	FAS-associated factor 1	12.6053	12.2185	12.5541	13.2577	14.2122	13.2854	12.8588	13.479	13.5061	13.6161	13.41	13.3225	13.7861	13.7295	13.7511	13.5735		1.40096	0.18256	0.527989	2.5215
P16930	FAH	Fumarylacetoacetase	15.2937	15.4738	16.4437	15.8353	15.7814	15.9567	15.6852	15.3389	15.8659	15.2391	15.5216	15.9659	15.7899	16.0672	15.351	15.5638		0.133277	0.875431	-0.0555311	-0.351247
Q6P587	FAHD1	Acylpyruvase FAHD1. mitochondrial	17.6004	17.359	16.7932	17.6538	17.3357	16.4713	16.768	17.5843	17.9151	17.3756	17.0836	17.3214	17.3731	17.0122	16.6606	16.8919		0.0208751	0.979191	0.0084641	0.0609924
Q96GK7	FAHD2A	Fumarylacetoacetate hydrolase domain-containing protein 2A	15.782	15.6254	15.3534	15.0383	15.0042	14.7324	14.4036	15.0988	15.6907	15.5165	15.5362	15.6195	15.3518	15.1796	15.1878	15.0172		1.16462	0.239116	0.257609	2.15161
Q8IWE2	FAM114A1	Protein NOXP20	17.633	16.3254	13.8375	17.8843	13.6112	13.332	13.4425	16.9489	13.1583	13.784	12.394	13.6271	13.5211	14.1581	16.0122	13.2923		0.941094	0.324873	-1.63345	-1.80213
Q9NRY5	FAM114A2	Protein FAM114A2	11.8584	12.095	12.9428	11.6796	12.1188	12.8056	12.1875	11.7897	12.873	12.7715	12.3535	13.1572	12.9634	13.0847	12.7866	13.0154		1.73868	0.11726	0.69098	3.06276
Q9NZB2;Q9NZB2-6	FAM120A	Constitutive coactivator of PPAR-gamma-like protein 1;Isoform of Q9NZB2. Isoform F of Constitutive coactivator of PPAR-gamma-like protein 1	13.5234	11.1173	12.8707	11.7423	10.1987	0	10.5611	10.5881	12.4177	11.4557	12.7623	12.4798	12.3865	14.2594	13.1319	13.5771		0.806528	0.390683	2.7336	1.58882
Q9BZQ8	FAM129A	Protein Niban	15.8861	13.7023	15.2046	14.9691	14.515	14.4449	14.5815	15.3245	15.1698	14.7656	14.9774	14.9096	14.726	14.2864	14.4274	15.5887		0.0542255	0.947115	0.0278763	0.153124
Q96C01	FAM136A	Protein FAM136A	14.7217	15.1643	14.5939	14.5175	14.1137	14.705	14.8947	14.7158	14.9784	15.2278	14.5619	15.4261	15.1524	15.3796	15.0198	15.6426		1.82075	0.103481	0.495243	3.19792
F8W7Q4;Q96A26	FAM162A	Isoform of Q96A26. Protein FAM162A;Protein FAM162A	15.751	15.5362	15.5017	16.8417	15.1429	14.9855	14.2389	14.6929	16.2235	15.9417	15.461	15.7812	15.6582	15.7941	16.0611	16.4944		0.922876	0.332554	0.590528	1.77345
K7EK00;Q96ND0	FAM210A	Isoform of Q96ND0. Protein FAM210A (Fragment);Protein FAM210A	14.1269	14.1601	10.4909	14.0186	10.656	14.7071	14.0552	14.6741	14.1642	14.2364	14.4524	13.8472	14.6422	14.114	14.23	13.8713		0.569142	0.536957	0.833611	1.19859
Q96KR6	FAM210B	Protein FAM210B. mitochondrial	13.1394	12.637	11.2099	9.45098	10.043	11.8616	12.3752	13.0421	13.5115	9.56605	12.9514	13.2896	11.5103	12.4702	13.0057	13.4032		0.507282	0.572599	0.743601	1.09204
Q9BRX8;Q9BRX8-2	FAM213A	Redox-regulatory protein FAM213A;Isoform of Q9BRX8. Isoform 2 of Redox-regulatory protein FAM213A	14.5251	14.5384	15.0914	14.6737	14.6563	14.7933	14.5781	14.5441	14.9787	14.7913	15.0292	14.5304	14.7269	14.5856	14.7038	14.6879		0.474271	0.593334	0.0791928	1.03401
H7C2U8;Q9H0X4	FAM234A	Isoform of Q9H0X4. Protein FAM234A (Fragment);Protein FAM234A	12.4072	11.0294	11.0246	10.575	12.6794	10.0137	11.7343	11.814	12.0898	9.72977	11.9496	12.0931	11.1848	12.1411	11.8646	11.0337		0.0782911	0.92183	0.101105	0.216139
Q9NUQ9	FAM49B	Protein FAM49B	15.0194	14.475	15.1618	14.8367	15.2523	15.1876	15.1919	15.0962	14.9139	14.7405	15.0092	15.1939	14.4775	15.0957	14.8483	15.057		0.395335	0.645455	-0.110635	-0.891215
Q9H5X1	FAM96A	MIP18 family protein FAM96A	11.3637	11.0188	10.8072	12.1112	12.2006	11.059	10.757	11.6201	11.7293	13.1871	13.3078	12.1912	12.8288	11.959	11.3866	12.9816		2.01834	0.0758846	1.07922	3.53089
E9PH82;Q8NCA5;Q8NCA5-2	FAM98A	Isoform of Q8NCA5. Protein FAM98A;Protein FAM98A;Isoform of Q8NCA5. Isoform 2 of Protein FAM98A	10.6102	10.8196	10.536	10.7526	10.7671	9.8321	10.2614	12.2	9.81547	10.6775	10.1732	10.924	11.1498	11.4037	11.0375	11.0564		0.0667027	0.931348	0.0573305	0.186126
Q52LJ0;Q52LJ0-2	FAM98B	Protein FAM98B;Isoform of Q52LJ0. Isoform 2 of Protein FAM98B	13.6437	12.7355	13.304	13.0372	13.4937	13.4898	10.2405	13.3345	13.608	13.2126	13.614	13.0021	13.4648	13.2096	13.4241	13.6104		0.583468	0.529162	0.483342	1.22291
K7ER00;Q9Y285;Q9Y285-2	FARSA	Isoform of Q9Y285. Phenylalanine--tRNA ligase alpha subunit;Phenylalanine--tRNA ligase alpha subunit;Isoform of Q9Y285. Isoform 2 of Phenylalanine--tRNA ligase alpha subunit	14.2895	14.344	12.6341	11.3421	13.8978	12.882	14.3713	13.6848	14.0681	14.5419	13.6707	13.6119	13.8644	13.999	14.4661	14.6047		1.25822	0.218109	0.672655	2.29768
Q9NSD9	FARSB	Phenylalanine--tRNA ligase beta subunit	13.5575	13.3556	13.5037	13.3934	13.5102	13.1424	13.6238	13.5817	12.9805	13.7203	13.5663	13.5218	13.6842	13.4451	13.8	13.5282		0.294319	0.730319	0.0722574	0.697842
M0QXL5;M0R299;P22087	FBL	Isoform of P22087. rRNA 2'-O-methyltransferase fibrillarin (Fragment);Isoform of P22087. rRNA 2'-O-methyltransferase fibrillarin (Fragment);rRNA 2'-O-methyltransferase fibrillarin	16.5989	15.9852	15.3909	16.3635	15.4091	13.4785	11.0984	14.3963	14.4227	14.9897	15.2761	9.2132	15.96	15.2373	14.9836	15.1192		0.146345	0.863744	-0.439892	-0.38181
P23142	FBLN1	Fibulin-1	15.6157	14.75	14.2854	14.6274	14.678	13.8174	13.4203	14.1176	14.0621	13.9312	15.0419	14.2833	14.1993	14.8442	14.6248	13.8507		0.0618696	0.938239	-0.0593226	-0.17343
P98095;P98095-2	FBLN2	Fibulin-2;Isoform of P98095. Isoform 2 of Fibulin-2	13.974	14.0245	14.0847	11.5485	14.1706	13.9139	13.4715	14.3367	13.5515	14.3169	13.4838	13.3053	13.8809	14.0006	14.6842	13.339		0.150742	0.859769	0.129733	0.391974
G3V4U0;G3XA98;Q9UBX5	FBLN5	Isoform of Q9UBX5. Fibulin-5;Isoform of Q9UBX5. Fibulin 5. isoform CRA_a;Fibulin-5	15.1901	13.4844	14.6745	13.8933	14.884	14.9582	14.9648	15.0443	15.2124	13.4635	14.348	14.7394	14.5967	14.5949	15.7094	14.8656		0.12125	0.889914	0.0545454	0.322632
P35555	FBN1	Fibrillin-1	16.5501	16.9593	16.4574	16.6401	16.7753	16.5994	16.2852	16.6093	16.1842	16.1708	16.6062	16.3668	16.6411	16.9452	17.0836	16.2312		0.181547	0.829564	-0.0808594	-0.461637
P09467	FBP1	Fructose-1.6-bisphosphatase 1	19.4558	18.4845	19.4688	18.7848	18.6234	18.2419	18.3512	18.9692	19.4458	19.5231	18.7636	18.9672	19.3276	19.2062	18.4834	19.4651		0.890383	0.348568	0.3503	1.72216
O00757	FBP2	Fructose-1.6-bisphosphatase isozyme 2	18.9195	19.1815	19.8387	18.9692	19.0071	18.9911	18.9134	19.3719	19.6875	19.7684	19.0631	19.4604	19.6865	18.9437	18.8766	19.8501		0.724262	0.437753	0.267967	1.45617
J3KQ72;Q9NRD1	FBXO6	Isoform of Q9NRD1. F-box only protein 6 (Fragment);F-box only protein 6	10.5376	9.99661	11.2409	9.82196	10.3338	9.34487	9.12077	11.3681	10.6167	9.948	10.8949	11.2123	10.9915	12.2564	10.9307	11.6449		1.15681	0.243339	0.841337	2.13943
Q9Y3I1;Q9Y3I1-2;Q9Y3I1-3	FBXO7	F-box only protein 7;Isoform of Q9Y3I1. Isoform 2 of F-box only protein 7;Isoform of Q9Y3I1. Isoform 3 of F-box only protein 7	14.7159	14.8377	15.6068	15.9582	15.3586	14.1676	14.5621	14.2946	10.4904	12.1319	14.1674	14.6858	15.2532	10.3975	15.069	14.4534		1.4013	0.182765	-1.6066	-2.52205
P14324;P14324-2	FDPS	Farnesyl pyrophosphate synthase;Isoform of P14324. Isoform 2 of Farnesyl pyrophosphate synthase	15.1812	15.1271	14.6055	14.3443	15.0423	14.8665	16.7643	14.6746	15.0684	14.7059	14.7915	14.7478	14.2903	14.2145	15.3638	15.2964		0.522885	0.562146	-0.265883	-1.11917
P10109	FDX1	Adrenodoxin. mitochondrial	13.9233	14.6422	14.5492	13.7214	13.9156	15.4119	14.0745	12.7183	15.1442	14.0772	13.059	14.8956	14.628	15.4571	14.3474	14.8899		0.509477	0.571196	0.442752	1.09587
P22830;P22830-2	FECH	Ferrochelatase. mitochondrial;Isoform of P22830. Isoform 2 of Ferrochelatase. mitochondrial	15.8364	15.3449	15.9517	14.6862	15.3421	15.1448	15.111	15.1104	15.8108	15.403	15.4483	15.2436	15.5062	14.5484	15.0185	14.8842		0.263536	0.752097	-0.0830519	-0.635865
H0YJ34;Q96AC1;Q96AC1-3	FERMT2	Isoform of Q96AC1. Fermitin family homolog 2 (Fragment);Fermitin family homolog 2;Isoform of Q96AC1. Isoform 3 of Fermitin family homolog 2	15.1091	15.4563	15.5039	14.3502	13.6734	14.0476	15.3486	14.8321	15.3022	13.3371	14.975	15.4363	13.6781	14.3618	15.1143	15.365		0.10322	0.905088	-0.093914	-0.278792
P02671;P02671-2	FGA	Fibrinogen alpha chain;Isoform of P02671. Isoform 2 of Fibrinogen alpha chain	18.0719	18.5824	17.9045	19.367	18.2686	17.5982	17.3216	17.2793	17.8014	18.1861	18.6307	18.371	18.4819	17.7149	18.6176	18.3455		0.345498	0.687415	0.219449	0.797542
P02675	FGB	Fibrinogen beta chain	17.4612	17.9472	17.252	18.763	17.7548	16.6786	16.6128	16.2843	17.3776	17.5723	18.0002	18.2335	17.964	16.7685	17.7343	17.6537		0.630249	0.49377	0.318774	1.30148
C9JC84;C9JEU5;P02679;P02679-2	FGG	Isoform of P02679. Fibrinogen gamma chain;Isoform of P02679. Fibrinogen gamma chain;Fibrinogen gamma chain;Isoform of P02679. Isoform Gamma-A of Fibrinogen gamma chain	17.5899	18.3519	17.7833	18.6727	18.3502	17.4347	16.9777	17.0251	17.6462	18.2311	18.1333	18.4333	18.3187	17.2781	17.9403	18.1746		0.634083	0.492808	0.246282	1.30787
A0A0U1RRB9;F2Z2V1;Q96C11;Q96C11-3;Q96C11-5	FGGY	Isoform of Q96C11. FGGY carbohydrate kinase domain-containing protein;Isoform of Q96C11. FGGY carbohydrate kinase domain-containing protein;FGGY carbohydrate kinase domain-containing protein;Isoform of Q96C11. Isoform 4 of FGGY carbohydrate kinase domain-containing protein;Isoform of Q96C11. Isoform 5 of FGGY carbohydrate kinase domain-containing protein	13.5831	13.1295	13.8589	10.6221	10.2425	13.9112	15.4473	13.1037	16.1409	15.8856	15.8446	10.5561	12.5467	13.3103	13.7711	13.7734		0.873228	0.355875	0.99129	1.695
P07954;P07954-2	FH	Fumarate hydratase. mitochondrial;Isoform of P07954. Isoform Cytoplasmic of Fumarate hydratase. mitochondrial	19.5725	19.8963	19.2888	19.1025	19.1507	19.4745	19.0644	19.5103	19.8202	19.5273	19.6194	19.5512	19.2919	19.1074	19.5737	19.7659		0.596749	0.522562	0.149636	1.24534
P49789	FHIT	Bis(5'-adenosyl)-triphosphatase	15.2133	14.9871	13.8787	10.7625	10.9152	15.4837	11.0636	13.3333	14.8878	15.1741	14.1228	15.1658	15.467	14.4465	13.8624	14.9772		1.09671	0.261992	1.55829	2.0457
Q13642-4;Q13642-5	FHL1	Isoform of Q13642. Isoform 4 of Four and a half LIM domains protein 1;Isoform of Q13642. Isoform 5 of Four and a half LIM domains protein 1	23.0266	23.3443	23.4939	23.2219	23.7037	23.3642	23.2147	23.2214	23.051	23.3673	22.8145	23.2955	23.5766	22.8528	23.2247	23.535		0.424089	0.62567	-0.109163	-0.94395
Q13643	FHL3	Four and a half LIM domains protein 3	20.4045	20.3254	20.6117	20.5977	20.6816	20.5022	20.5112	20.5634	20.3757	20.0576	20.0698	20.457	20.4664	20.3262	20.3484	20.6581		1.54256	0.149639	-0.1798	-2.74596
Q9Y613	FHOD1	FH1/FH2 domain-containing protein 1	15.9213	15.5564	15.6051	15.8448	16.026	15.9493	15.8124	15.5307	15.7263	15.8975	15.493	15.8587	15.8009	15.3577	15.5149	15.9998		0.252056	0.764688	-0.0746276	-0.612315
A0A075B6G6;Q7Z7B0;Q7Z7B0-2;Q7Z7B0-3	FILIP1	Isoform of Q7Z7B0. Filamin A interacting protein 1. isoform CRA_c;Filamin-A-interacting protein 1;Isoform of Q7Z7B0. Isoform 2 of Filamin-A-interacting protein 1;Isoform of Q7Z7B0. Isoform 3 of Filamin-A-interacting protein 1	12.4016	9.64836	17.8765	11.4524	14.0038	11.694	18.9462	18.4103	19.7304	17.1768	9.6288	18.5603	15.9517	20.7087	10.1084	19.2621		0.360117	0.67176	2.08677	0.82534
Q9Y3D6	FIS1	Mitochondrial fission 1 protein	16.7518	16.7247	16.6847	16.356	16.8657	17.0995	16.3962	16.5089	17.1095	16.9696	16.4812	17.3108	17.0828	16.4192	16.894	16.795		0.585944	0.527951	0.209352	1.2271
A5D6W6;H0YL77	FITM1;	Fat storage-inducing transmembrane protein 1;Uncharacterized protein (Fragment)	14.4984	11.5216	13.4254	14.3993	14.2863	14.0735	14.6003	14.8085	14.7251	14.7009	14.8278	14.3603	15.0361	14.2702	14.5728	14.9752		0.991782	0.300668	0.731887	1.8817
P62942	FKBP1A	Peptidyl-prolyl cis-trans isomerase FKBP1A	19.606	19.5093	19.7651	19.7634	20.2999	20.0279	19.9144	19.5495	19.7805	19.7713	19.7049	19.9941	19.95	20.2796	19.8534	19.8409		0.54038	0.555952	0.092416	1.14938
P26885	FKBP2	Peptidyl-prolyl cis-trans isomerase FKBP2	16.8547	16.4267	15.4345	13.4535	16.0702	16.6723	13.1814	15.8579	15.5616	15.2919	15.6436	15.9791	15.4814	16.8085	16.0505	12.5682		0.0343054	0.964626	-0.0708227	-0.0988244
Q00688	FKBP3	Peptidyl-prolyl cis-trans isomerase FKBP3	19.5532	19.7003	19.5988	19.6331	19.7098	20.1535	19.5563	19.7007	20.0176	19.8024	19.3511	19.7216	19.9154	20.3373	19.5388	19.8027		0.77856	0.404824	0.110155	1.54396
Q02790	FKBP4	Peptidyl-prolyl cis-trans isomerase FKBP4	13.8346	15.7911	12.1371	12.9453	11.9972	10.1128	13.4057	10.9651	13.0495	13.2175	13.0919	13.8408	12.6665	12.7461	12.8004	14.8621		0.393986	0.646134	0.635724	0.888718
Q13451	FKBP5	Peptidyl-prolyl cis-trans isomerase FKBP5	13.8635	13.8393	13.9543	14.1743	13.7299	14.4591	14.1115	14.248	14.2412	14.2247	14.2749	14.3616	14.363	13.8609	14.1082	14.2285		0.576524	0.532242	0.160409	1.21114
O95302;O95302-3	FKBP9	Peptidyl-prolyl cis-trans isomerase FKBP9;Isoform of O95302. Isoform 3 of Peptidyl-prolyl cis-trans isomerase FKBP9	10.5269	10.5684	12.2555	11.3693	11.2411	12.7741	11.7906	10.4929	13.4488	12.296	11.9235	12.3092	13.6396	13.6216	13.5583	13.187	+	2.39145	0.0486838	1.62066	4.1951
Q13045;Q13045-2;Q13045-3	FLII	Protein flightless-1 homolog;Isoform of Q13045. Isoform 2 of Protein flightless-1 homolog;Isoform of Q13045. Isoform 3 of Protein flightless-1 homolog	12.185	10.5369	12.0423	11.564	12.0094	11.9519	11.8422	12.5029	12.8372	12.2649	11.9476	12.2602	12.5235	12.4102	12.3758	12.4706		1.58892	0.141983	0.5569	2.82014
P21333;P21333-2	FLNA	Filamin-A;Isoform of P21333. Isoform 2 of Filamin-A	18.5786	18.8422	18.4732	18.6768	18.6607	18.7209	19.1499	18.9676	18.851	18.9376	18.9429	18.6228	18.7985	18.7152	19.0148	19.0883		0.852828	0.366089	0.112668	1.66264
O75369;O75369-2;O75369-8;O75369-9	FLNB	Filamin-B;Isoform of O75369. Isoform 2 of Filamin-B;Isoform of O75369. Isoform 8 of Filamin-B;Isoform of O75369. Isoform 9 of Filamin-B	19.5735	19.5466	19.2851	19.6603	19.6347	19.5404	19.7594	19.8018	19.3537	19.4813	19.5952	19.3118	19.2324	19.3604	19.4013	19.4705		1.32798	0.199426	-0.1994	-2.40684
Q14315	FLNC	Filamin-C	21.1475	21.2345	21.2162	21.5691	21.5084	21.5498	21.7528	21.4053	21.3335	21.5527	21.3531	21.3065	21.5617	21.1997	21.2349	21.7013		0.0554476	0.945016	-0.0175128	-0.156389
A0A140T9R1;O75955;O75955-2	FLOT1	Isoform of O75955. Flotillin-1 (Fragment);Flotillin-1;Isoform of O75955. Isoform 2 of Flotillin-1	13.6392	13.5401	13.149	13.1548	13.2395	13.0674	12.8452	13.5435	13.2706	12.7444	12.6971	13.4988	13.0485	12.702	13.7861	12.7138		0.467936	0.596091	-0.21465	-1.02276
E7EMK3;J3QLD9;Q14254	FLOT2	Isoform of Q14254. Flotillin-2;Isoform of Q14254. Flotillin-2;Flotillin-2	15.6618	15.1501	15.9817	15.3785	15.2777	15.4537	14.7645	14.9679	15.0466	14.8393	14.8203	15.0918	14.8841	15.2517	15.2202	14.3313		1.34109	0.197175	-0.393842	-2.42739
P02751;P02751-14;P02751-3;P02751-8	FN1	Fibronectin;Isoform of P02751. Isoform 14 of Fibronectin;Isoform of P02751. Isoform 3 of Fibronectin;Isoform of P02751. Isoform 8 of Fibronectin	15.1804	15.8723	15.1941	16.1694	15.6625	14.9573	15.0454	14.7429	15.0663	15.1248	15.2542	15.3106	15.925	16.1364	15.7928	15.7941		0.309492	0.715286	0.197502	0.727811
Q9H479	FN3K	Fructosamine-3-kinase	13.7405	14.0443	14.5142	13.74	14.2047	14.6341	13.1418	13.9342	14.2823	14.6702	14.1422	13.9809	14.3867	13.5935	13.4514	14.1774		0.186819	0.827125	0.0913453	0.473304
Q9HA64	FN3KRP	Ketosamine-3-kinase	13.4592	13.9782	14.4371	12.4602	13.3148	11.6176	13.0086	10.5146	12.6424	13.8522	13.0098	13.4091	13.1638	11.1466	12.7219	12.0554		0.110012	0.900165	-0.0986508	-0.295444
J3KNQ2;Q4ZHG4;Q4ZHG4-2	FNDC1	Isoform of Q4ZHG4. Fibronectin type III domain-containing protein 1 (Fragment);Fibronectin type III domain-containing protein 1;Isoform of Q4ZHG4. Isoform 2 of Fibronectin type III domain-containing protein 1	20.4142	20.1173	20.5214	19.0779	20.7901	20.2946	19.917	19.7574	19.6479	19.8316	19.7818	20.2493	18.1253	19.8527	19.3347	19.7163		0.721408	0.439026	-0.54378	-1.45153
P49354;P49354-2	FNTA	Protein farnesyltransferase/geranylgeranyltransferase type-1 subunit alpha;Isoform of P49354. Isoform 2 of Protein farnesyltransferase/geranylgeranyltransferase type-1 subunit alpha	12.7821	12.3727	13.0445	13.1739	13.1302	13.72	13.1571	13.1069	13.3746	12.9102	13.8828	13.2106	13.5296	13.3673	13.6546	13.3233		1.4707	0.168163	0.345689	2.63168
P49356	FNTB	Protein farnesyltransferase subunit beta	12.8827	11.3643	10.6342	11.5613	13.7019	9.81985	9.85924	9.7174	14.3025	13.7461	10.9191	13.4694	13.9751	14.0809	10.0345	14.4905		1.73167	0.117145	1.93464	3.0513
Q16658	FSCN1	Fascin	13.4252	13.033	12.2628	12.0878	12.2191	12.3403	12.4995	10.3418	14.4686	14.8671	14.2253	12.859	14.4911	14.1994	14.4525	14.0724	+	3.33041	0.0208	1.92824	6.15053
A1L4K1	FSD2	Fibronectin type III and SPRY domain-containing protein 2	13.6418	13.4174	13.7619	14.0613	13.4645	13.1717	13.0362	13.3329	13.5694	13.6634	13.2273	13.5831	13.7154	13.2296	12.8494	13.7483		0.115084	0.895658	-0.0377531	-0.307769
P02794	FTH1	Ferritin heavy chain	19.2429	19.5748	20.3473	19.6887	19.2821	19.5206	19.144	19.1219	19.2555	20.0551	19.7575	19.983	19.7491	20.3846	18.8649	19.2712		0.496625	0.578582	0.174818	1.0734
P02792	FTL	Ferritin light chain	17.6491	17.1291	17.0402	16.8434	16.106	15.9793	15.8363	16.4658	17.283	16.9076	17.0946	16.9767	16.9203	17.9337	16.8585	15.3776		0.379309	0.658603	0.287843	0.861423
A0A1B0GTC3;A0A1B0GVH5;Q9C0B1	FTO	Isoform of Q9C0B1. Alpha-ketoglutarate-dependent dioxygenase FTO;Isoform of Q9C0B1. Alpha-ketoglutarate-dependent dioxygenase FTO;Alpha-ketoglutarate-dependent dioxygenase FTO	11.7081	11.3483	13.0155	12.2868	12.8988	12.0551	12.6497	12.5508	12.315	15.4749	11.7704	12.131	11.845	16.7873	16.379	11.3817		0.638827	0.491923	1.19639	1.31576
Q96AE4-2	FUBP1	Isoform of Q96AE4. Isoform 2 of Far upstream element-binding protein 1	14.3862	15.2875	15.4874	14.7742	15.366	14.4592	14.0529	14.4862	14.7317	15.3447	14.8951	15.3145	15.6994	16.2596	15.5982	15.4285		1.22257	0.224839	0.621506	2.242
P04066	FUCA1	Tissue alpha-L-fucosidase	12.1938	13.0325	12.0612	11.4786	11.2811	11.1759	11.5619	11.0208	11.2146	12.0478	10.5054	10.2609	10.9979	12.2852	10.7022	12.232		0.567028	0.538274	-0.444977	-1.19499
Q9BWH2	FUNDC2	FUN14 domain-containing protein 2	18.7982	18.7481	19.0065	18.2994	18.6176	19.019	18.2044	18.7252	19.3558	18.868	18.7711	19.1997	18.9746	18.8435	18.9829	19.1515		1.27484	0.21482	0.341072	2.32365
H3BPE7;P35637;P35637-2	FUS	Isoform of P35637. RNA-binding protein FUS;RNA-binding protein FUS;Isoform of P35637. Isoform Short of RNA-binding protein FUS	14.7853	14.8469	15.2696	14.9193	15.2348	15.0722	14.3029	14.3751	15.2472	14.9373	14.6795	15.0721	15.3122	15.5083	15.0792	14.9969		0.86722	0.358809	0.253341	1.68548
C9JAX1;Q16595	FXN	Isoform of Q16595. Frataxin. mitochondrial;Frataxin. mitochondrial	15.3796	15.4057	15.8693	15.5533	15.1161	15.9144	14.3777	15.4083	15.955	15.8491	15.1879	15.9507	15.5779	16.3018	15.1364	15.8318		1.23363	0.223715	0.345786	2.25927
B4DXZ6;P51114	FXR1	Isoform of P51114. Fragile X mental retardation syndrome-related protein 1;Fragile X mental retardation syndrome-related protein 1	15.0771	14.8525	15.436	15.2157	15.6447	15.1063	14.7846	15.1131	15.2903	15.3532	15.0943	15.2278	15.5161	15.6343	15.265	15.5011		0.930808	0.329318	0.206479	1.78594
P51116	FXR2	Fragile X mental retardation syndrome-related protein 2	11.9629	10.0187	11.0389	10.6665	12.3139	10.0984	11.2344	11.4164	11.0611	10.5009	14.6618	15.0282	12.3178	10.6533	15.3457	10.5605		0.939991	0.325494	1.42237	1.8004
K7EQG4;O00168	FXYD1	Isoform of O00168. FXYD domain-containing ion transport regulator (Fragment);Phospholemman	19.2556	19.5309	19.6052	18.9877	19.3489	19.871	19.1187	19.1953	19.4704	19.1804	18.8035	19.0568	19.5584	20.3298	19.189	19.2933		0.00960336	0.986532	-0.00395513	-0.0284074
Q9BQS8;Q9BQS8-4	FYCO1	FYVE and coiled-coil domain-containing protein 1;Isoform of Q9BQS8. Isoform 4 of FYVE and coiled-coil domain-containing protein 1	13.9231	13.7944	14.3868	13.9311	14.3385	14.1977	13.4776	14.0017	13.7465	13.7746	13.657	13.923	13.9756	13.7103	13.1756	14.2207		1.18914	0.231534	-0.233489	-2.18985
P27469	G0S2	G0/G1 switch protein 2	14.6408	13.352	13.9257	10.8342	13.4964	13.6325	12.9055	12.6375	14.7331	14.287	14.7232	14.48	14.1052	13.5153	13.7755	13.9614		1.38082	0.18772	1.01951	2.48981
Q13283	G3BP1	Ras GTPase-activating protein-binding protein 1	15.0403	14.894	15.2682	14.9763	15.1492	15.0378	14.4934	14.8507	15.1447	13.9838	14.6558	14.8982	15.3874	15.5657	14.8831	14.774		0.111936	0.898559	-0.0521693	-0.300131
Q9UN86	G3BP2	Ras GTPase-activating protein-binding protein 2	13.3785	12.5206	13.8754	13.9141	14.0515	13.93	13.3907	13.507	13.1182	13.9505	12.8735	14.0854	13.9072	13.0622	13.6285	13.8714		0.0111013	0.98547	-0.00887978	-0.0327839
E7EM57;E7EUI8;P11413;P11413-2;P11413-3	G6PD	Isoform of P11413. Glucose-6-phosphate 1-dehydrogenase (Fragment);Isoform of P11413. Glucose-6-phosphate 1-dehydrogenase (Fragment);Glucose-6-phosphate 1-dehydrogenase;Isoform of P11413. Isoform Long of Glucose-6-phosphate 1-dehydrogenase;Isoform of P11413. Isoform 3 of Glucose-6-phosphate 1-dehydrogenase	13.799	12.9986	12.146	11.8954	12.2295	13.722	13.3472	12.759	13.4844	10.8669	12.8467	10.3326	11.3917	10.0607	12.4804	11.1413		1.57716	0.144391	-1.28651	-2.80128
P10253	GAA	Lysosomal alpha-glucosidase	12.6781	13.0501	14.7779	12.4927	14.5887	13.3796	13.2631	13.6049	13.1914	14.2491	13.1071	14.2712	14.1846	13.7873	12.72	12.7489		0.0465388	0.952815	0.0530552	0.132415
P60520	GABARAPL2	Gamma-aminobutyric acid receptor-associated protein-like 2	14.2143	14.6374	14.6745	14.4698	14.4636	14.6934	14.3527	13.8165	14.1422	14.456	14.4757	14.1867	14.3365	14.3333	14.174	14.0207		1.39755	0.182983	-0.149623	-2.51614
Q8TAE8	GADD45GIP1	Growth arrest and DNA damage-inducible proteins-interacting protein 1	13.9126	13.0903	13.4492	13.3547	13.4683	13.1873	12.9794	13.3696	14.546	13.8366	13.9238	11.9321	14.4458	14.3932	11.4005	14.0014		0.220466	0.797409	0.2085	0.546171
P51570;P51570-2	GALK1	Galactokinase;Isoform of P51570. Isoform 2 of Galactokinase	14.1785	14.7941	13.6895	15.2047	14.4881	13.991	17.2686	15.1506	15.1205	15.1337	10.0282	15.6146	14.9438	13.9016	13.9482	16.8464		0.235064	0.780232	-0.403525	-0.576992
Q96C23	GALM	Aldose 1-epimerase	15.3982	15.3106	16.354	15.5109	15.8097	15.7436	16.0809	15.3773	15.4538	14.8536	15.0796	15.6701	15.5167	14.8776	15.6099	15.3926		1.2282	0.223256	-0.391421	-2.25079
F2Z2X9;G3V223;G3V3U5;G3V4G9;P07902	GALT;GALT;GALT;;GALT	Isoform of P07902. Galactose-1-phosphate uridylyltransferase;Isoform of P07902. Galactose-1-phosphate uridylyltransferase;Isoform of P07902. Galactose-1-phosphate uridylyltransferase;Uncharacterized protein (Fragment);Galactose-1-phosphate uridylyltransferase	11.1685	11.7509	12.4582	11.7577	11.0157	11.7071	9.94989	11.1341	10.7159	11.932	10.6452	12.38	12.7436	11.0922	11.9726	12.0893		0.309465	0.714998	0.328584	0.727756
Q14353	GAMT	Guanidinoacetate N-methyltransferase	19.0012	18.9608	18.364	18.251	18.5714	18.6467	18.4737	18.5045	18.4878	18.6467	18.5273	17.671	18.354	17.914	18.168	18.1734		2.11954	0.0690909	-0.353904	-3.70609
Q14697;Q14697-2	GANAB	Neutral alpha-glucosidase AB;Isoform of Q14697. Isoform 2 of Neutral alpha-glucosidase AB	15.4752	15.3029	15.3755	15.2442	15.6163	15.4889	15.0596	15.0477	15.587	15.2337	15.2051	15.2389	15.3378	15.4347	15.2426	15.2753		0.0390367	0.958697	-0.00688255	-0.11191
P04406	GAPDH	Glyceraldehyde-3-phosphate dehydrogenase	25.8529	25.4633	26.05	26.0635	26.1973	25.7754	25.7821	25.5905	26.1005	25.8752	25.3685	26.0934	26.2598	25.5022	25.5499	26.0954		0.02147	0.978792	0.00871873	0.0626903
P41250	GARS	Glycine--tRNA ligase	14.9228	15.1972	15.2628	14.9712	15.3052	15.3308	15.1026	14.9485	15.2602	15.162	14.9988	15.1449	15.3195	15.2159	15.1013	15.2116		0.275237	0.74185	0.0466622	0.659617
P22102	GART	Trifunctional purine biosynthetic protein adenosine-3	14.3693	13.0425	15.0895	13.8717	13.4478	13.5824	13.3787	14.4877	14.655	14.6971	13.6221	13.5995	13.5711	15.0391	15.1475	13.5953		0.334909	0.697485	0.332132	0.777227
A0A0U1RR30;A0A0U1RRM1;Q86YP4;Q86YP4-2;Q86YP4-3;Q8WXI9	GATAD2B;GATAD2B;GATAD2A;GATAD2A;GATAD2A;GATAD2B	Isoform of Q8WXI9. Transcriptional repressor p66-beta (Fragment);Isoform of Q8WXI9. Transcriptional repressor p66-beta;Transcriptional repressor p66-alpha;Isoform of Q86YP4. Isoform 2 of Transcriptional repressor p66-alpha;Isoform of Q86YP4. Isoform 3 of Transcriptional repressor p66-alpha;Transcriptional repressor p66-beta	11.1476	16.6341	16.3411	15.0842	15.4065	16.5869	14.8594	14.6399	15.1486	15.0824	13.628	15.6147	15.841	16.7645	15.3539	15.1591		0.130589	0.879024	0.236557	0.344892
H0YE25;H0YER3;H0YF25;Q8NB37;Q8NB37-2;Q8NB37-3	GATD1	Isoform of Q8NB37. Glutamine amidotransferase-like class 1 domain-containing protein 1 (Fragment);Isoform of Q8NB37. Glutamine amidotransferase-like class 1 domain-containing protein 1 (Fragment);Isoform of Q8NB37. Glutamine amidotransferase-like class 1 domain-containing protein 1 (Fragment);Glutamine amidotransferase-like class 1 domain-containing protein 1;Isoform of Q8NB37. Isoform 2 of Gluta…	10.9706	10.3628	10.6183	10.1886	11.2775	10.4055	10.0937	11.2206	11.0791	9.92259	11.6277	12.215	12.5521	12.6274	12.5105	12.5771		1.99562	0.0774393	1.24677	3.49199
Q04446	GBE1	1.4-alpha-glucan-branching enzyme	16.5419	16.3369	16.6476	16.3779	16.5663	17.1686	16.5555	16.3637	16.7872	16.6005	16.3651	16.5053	17.1345	17.126	16.7967	16.9937		1.1159	0.256092	0.218825	2.07563
P32455	GBP1	Guanylate-binding protein 1	14.0622	13.966	17.4871	14.3917	18.1803	16.513	17.5395	13.6746	13.8014	17.5553	13.7469	13.941	17.1976	16.3664	14.494	16.6766		0.104112	0.90474	-0.254392	-0.280988
D6RF35;P02774;P02774-3	GC	Isoform of P02774. Vitamin D-binding protein;Vitamin D-binding protein;Isoform of P02774. Isoform 3 of Vitamin D-binding protein	16.7737	16.9663	16.8915	16.7537	17.1566	16.8982	16.2866	16.2835	16.5713	16.6601	15.6784	16.8133	16.6747	17.0934	16.8429	16.9184		0.174658	0.836917	-0.0946927	-0.446285
Q92947	GCDH	Glutaryl-CoA dehydrogenase. mitochondrial	11.1031	14.2463	14.6861	13.6683	13.6314	13.8579	13.9232	13.9307	13.7357	13.6278	14.0624	14.1502	13.9331	14.5878	13.741	13.4229		0.306351	0.717206	0.27675	0.721635
P16383;P16383-2;P16383-3;P16383-4	GCFC2	GC-rich sequence DNA-binding factor 2;Isoform of P16383. Isoform 2 of GC-rich sequence DNA-binding factor 2;Isoform of P16383. Isoform 3 of GC-rich sequence DNA-binding factor 2;Isoform of P16383. Isoform 4 of GC-rich sequence DNA-binding factor 2	11.2682	12.2684	13.5354	10.375	10.1174	11.2751	10.729	10.1496	11.3758	13.8444	11.1552	14.072	13.4094	11.2144	11.9189	11.0928		0.768547	0.408452	1.04562	1.52784
P48506	GCLC	Glutamate--cysteine ligase catalytic subunit	15.0219	14.1824	15.4924	13.7812	15.3565	13.8986	13.5306	14.0957	13.8057	15.6438	13.4871	15.3994	14.8887	12.9723	14.1993	17.7068		0.21067	0.806691	0.342965	0.525227
P48507;P48507-2	GCLM	Glutamate--cysteine ligase regulatory subunit;Isoform of P48507. Isoform 2 of Glutamate--cysteine ligase regulatory subunit	14.1585	14.1381	13.9584	14.1038	14.8621	10.3099	14.0054	14.0577	9.95894	14.8433	9.3349	13.9777	12.933	14.3802	14.4246	15.0322		0.235333	0.780941	-0.588631	-0.577556
Q92616	GCN1	eIF-2-alpha kinase activator GCN1	11.0908	11.4002	11.3283	11.2044	11.0615	13.4684	10.4392	10.8798	11.2068	12.2657	10.9068	9.72211	11.1114	11.6281	12.6128	10.936		0.0474138	0.952886	-0.060347	-0.134787
P23434	GCSH	Glycine cleavage system H protein. mitochondrial	16.533	17.2383	16.9812	16.8296	16.2177	16.7462	17.1521	16.5609	17.3293	16.5886	15.9414	16.6971	16.3457	17.0152	16.5947	16.1532		0.433923	0.618187	-0.199225	-0.961788
Q9NZC3	GDE1	Glycerophosphodiester phosphodiesterase 1	13.9644	13.7172	10.5465	14.5846	14.2101	13.4379	13.3113	10.0589	13.7586	13.408	13.076	9.02055	13.4831	12.9508	12.6227	13.192		0.117467	0.893683	-0.289903	-0.313528
P31150	GDI1	Rab GDP dissociation inhibitor alpha	16.8514	16.9907	16.8148	16.4862	16.782	17.125	16.8565	16.6799	16.6263	16.4922	16.283	15.9216	16.2786	16.2669	16.1951	16.2377	+	4.17269	0.024	-0.535638	-8.38974
P50395	GDI2	Rab GDP dissociation inhibitor beta	16.9336	17.2062	17.1508	17.0459	17.3866	17.2561	16.9282	16.9262	16.7515	16.792	16.6588	16.9843	17.1412	16.865	16.9969	16.9453		1.61523	0.136057	-0.212332	-2.86243
P55789	GFER	FAD-linked sulfhydryl oxidase ALR	14.7904	13.5383	15.0166	15.2021	15.5744	15.0001	12.8611	12.5179	14.7589	12.8912	12.5266	13.7705	12.7668	13.97	12.8303	12.884		1.35786	0.195117	-1.01281	-2.45373
Q96RP9	GFM1	Elongation factor G. mitochondrial	15.0564	15.0282	15.3714	14.7488	15.0922	15.1337	14.5317	15.1525	15.4214	15.2369	15.0605	15.7763	15.5207	14.2242	14.5969	15.6112		0.355426	0.676823	0.166635	0.816451
Q969S9;Q969S9-2;Q969S9-3;Q969S9-4;Q969S9-5	GFM2	Ribosome-releasing factor 2. mitochondrial;Isoform of Q969S9. Isoform 2 of Ribosome-releasing factor 2. mitochondrial;Isoform of Q969S9. Isoform 3 of Ribosome-releasing factor 2. mitochondrial;Isoform of Q969S9. Isoform 4 of Ribosome-releasing factor 2. mitochondrial;Isoform of Q969S9. Isoform 5 of Ribosome-releasing factor 2. mitochondrial	10.5346	10.4061	11.8835	10.596	11.0215	10.3993	9.98086	10.8487	9.97905	9.77424	8.82187	9.63185	10.5321	10.9904	9.67156	9.48478		1.24187	0.221831	-0.848085	-2.27213
B0QYR6;Q9UJY5;Q9UJY5-2;Q9UJY5-3;Q9UJY5-4;Q9UJY5-6	GGA1	Isoform of Q9UJY5. ADP-ribosylation factor-binding protein GGA1 (Fragment);ADP-ribosylation factor-binding protein GGA1;Isoform of Q9UJY5. Isoform 2 of ADP-ribosylation factor-binding protein GGA1;Isoform of Q9UJY5. Isoform 3 of ADP-ribosylation factor-binding protein GGA1;Isoform of Q9UJY5. Isoform 4 of ADP-ribosylation factor-binding protein GGA1;Isoform of Q9UJY5. Isoform 6 of ADP-ribosylation…	12.9409	10.6941	15.7631	15.5957	16.5136	16.7245	10.3367	14.3991	10.5391	10.2639	12.394	12.8134	17.0956	17.4127	12.7776	16.0391		0.242609	0.775567	-0.454039	-0.592749
Q9BVM4	GGACT	Gamma-glutamylaminecyclotransferase	14.353	14.3188	14.2722	13.9422	14.5324	14.1156	14.2489	14.129	13.8891	13.1676	14.0771	14.1689	14.6346	14.3081	14.9099	14.5861		0.0365074	0.961178	-0.0213555	-0.10493
O75223	GGCT	Gamma-glutamylcyclotransferase	16.5122	16.1783	16.1651	16.3219	16.3014	15.5801	15.5567	15.6732	15.9502	15.892	15.3489	16.182	15.6977	15.6387	15.3454	15.7243		1.56593	0.147249	-0.313715	-2.7833
C9J6G3;C9J7M1;O95749;O95749-2	GGPS1	Isoform of O95749. Geranylgeranyl pyrophosphate synthase (Fragment);Isoform of O95749. Geranylgeranyl pyrophosphate synthase (Fragment);Geranylgeranyl pyrophosphate synthase;Isoform of O95749. Isoform 2 of Geranylgeranyl pyrophosphate synthase	11.975	10.9853	11.4891	11.6922	11.7853	12.6178	12.5367	12.8169	11.1593	11.9831	12.3843	9.45569	11.6295	10.9496	12.4664	12.2419		0.531323	0.557517	-0.45355	-1.13377
P36269;P36269-2;P36269-3	GGT5	Glutathione hydrolase 5 proenzyme;Isoform of P36269. Isoform 2 of Glutathione hydrolase 5 proenzyme;Isoform of P36269. Isoform 3 of Glutathione hydrolase 5 proenzyme	11.7712	10.9711	13.1564	10.4755	10.9239	13.1349	12.1829	10.754	13.1735	9.5613	11.572	12.9021	13.2601	13.2798	10.4096	13.1814		0.317894	0.707069	0.496257	0.74425
Q9H3K2	GHITM	Growth hormone-inducible transmembrane protein	14.6628	14.3807	13.5738	14.3233	13.7034	14.1699	13.6533	13.8102	14.8943	14.7501	14.1109	14.6821	14.3956	14.3619	14.3386	14.2624	+	3.50968	0.0215	0.439822	6.58265
I1E4Y6;Q6Y7W6;Q6Y7W6-3;Q6Y7W6-4;Q6Y7W6-5	GIGYF2	Isoform of Q6Y7W6. GRB10-interacting GYF protein 2;GRB10-interacting GYF protein 2;Isoform of Q6Y7W6. Isoform 2 of GRB10-interacting GYF protein 2;Isoform of Q6Y7W6. Isoform 3 of GRB10-interacting GYF protein 2;Isoform of Q6Y7W6. Isoform 4 of GRB10-interacting GYF protein 2	15.7244	10.9041	11.8697	10.1342	11.9895	11.1616	11.4151	9.75459	10.652	11.7886	10.9084	10.9504	10.7237	11.6031	10.7202	11.6123		0.27651	0.742419	-0.499301	-0.662187
G5E9W9;Q9NUV9	GIMAP4	Isoform of Q9NUV9. GTPase IMAP family member 4;GTPase IMAP family member 4	10.2896	12.6955	11.4492	10.4431	10.179	9.77052	10.6255	10.6348	11.5731	10.5787	10.9335	10.8423	11.0469	11.7764	11.5055	11.6156		0.485742	0.586195	0.473092	1.05427
O14908	GIPC1	PDZ domain-containing protein GIPC1	12.2657	14.4988	14.0864	13.0116	14.2842	11.8687	9.82749	10.4384	12.2088	13.8255	11.6102	14.2628	13.7779	12.0785	13.2831	13.7223		0.33851	0.694447	0.560993	0.784152
Q9H4G4	GLIPR2	Golgi-associated plant pathogenesis-related protein 1	14.0595	14.1094	13.7532	13.84	14.0238	14.0115	13.9186	13.7182	14.0657	13.3428	13.5423	13.7016	14.0354	14.6057	14.1232	13.5983		0.147475	0.862184	-0.0523591	-0.384426
Q04760	GLO1	Lactoylglutathione lyase	19.6454	19.8322	19.7369	19.4931	19.5673	19.9911	19.8493	19.3592	19.5877	19.2345	19.4083	19.2062	19.3522	19.982	19.5434	19.1422		2.2548	0.0552653	-0.252256	-3.94584
F6TLX2;Q9HC38-2	GLOD4	Isoform of Q9HC38. Glyoxalase domain-containing protein 4;Isoform of Q9HC38. Isoform 2 of Glyoxalase domain-containing protein 4	17.1587	17.215	17.3473	17.0291	17.0982	17.5093	16.8168	16.7782	17.3237	16.7525	16.827	17.0932	16.8902	17.3106	17.0286	16.8517		0.512236	0.568059	-0.109396	-1.10067
P35754	GLRX	Glutaredoxin-1	17.9275	17.9559	17.2651	17.8916	17.5282	17.7536	17.3181	17.1581	17.6474	17.5256	17.2843	17.661	17.3767	18.3123	18.0281	17.0578		0.0283606	0.974281	0.0118577	0.0822063
O76003	GLRX3	Glutaredoxin-3	15.477	15.7574	15.2547	15.2729	15.4038	15.7314	15.4846	15.3665	15.9405	15.3005	15.2914	15.6611	15.5975	15.2905	15.579	15.4442		0.141773	0.867493	0.0445495	0.371178
Q86SX6	GLRX5	Glutaredoxin-related protein 5. mitochondrial	18.3687	18.2705	18.4512	17.8405	17.978	18.2329	18.1603	18.1557	18.8024	18.4222	18.2311	18.5506	18.3175	18.4159	17.9565	17.4194		0.204672	0.810949	0.0822175	0.512298
F5GZ49;F5H0U5;Q9NZD2	GLTP	Isoform of Q9NZD2. Glycolipid transfer protein;Isoform of Q9NZD2. Glycolipid transfer protein;Glycolipid transfer protein	11.7071	10.7698	12.4408	11.9581	12.3924	12.5916	12.186	12.1395	12.1469	12.723	12.1873	12.8333	12.3748	12.3904	12.4671	12.7359		0.94235	0.324761	0.45916	1.80411
P00367	GLUD1	Glutamate dehydrogenase 1. mitochondrial	16.9719	16.6284	16.8203	16.4089	16.5127	17.0356	16.5982	16.7956	17.3505	16.814	16.7374	17.1144	16.7884	16.7839	16.7113	17.0058		0.988601	0.30148	0.191756	1.87672
P15104	GLUL	Glutamine synthetase	10.5599	11.7357	11.1283	11.8207	9.62242	14.4348	12.2423	14.1861	11.5432	14.3398	10.1341	13.9051	11.1307	13.7492	14.0205	14.6868		1.15059	0.244468	0.972405	2.12973
G3V4P8;P60983	GMFB	Isoform of P60983. Glia maturation factor beta (Fragment);Glia maturation factor beta	14.5399	13.1679	12.484	15.022	12.4494	14.4901	14.279	14.3428	14.3831	12.9459	13.9832	15.0007	14.498	14.8422	13.6082	14.2732		0.478321	0.591239	0.344911	1.04117
Q96IJ6;Q96IJ6-2	GMPPA	Mannose-1-phosphate guanyltransferase alpha;Isoform of Q96IJ6. Isoform 2 of Mannose-1-phosphate guanyltransferase alpha	11.7613	10.868	12.1646	12.5258	13.014	12.0714	12.657	12.14	12.6388	12.3867	9.7493	13.1181	12.5919	12.3643	12.7299	11.9486		0.0342064	0.96454	0.0407046	0.0985494
Q9Y5P6;Q9Y5P6-2	GMPPB	Mannose-1-phosphate guanyltransferase beta;Isoform of Q9Y5P6. Isoform 2 of Mannose-1-phosphate guanyltransferase beta	13.7749	13.8207	13.9461	14.3077	14.2604	13.9969	13.7332	13.979	14.0066	13.9293	13.6636	13.9549	13.9628	13.5231	13.763	13.8618		0.841124	0.36872	-0.144226	-1.64403
P36959	GMPR	GMP reductase 1	14.9404	13.2472	14.5237	14.6028	14.8661	14.8771	15.1452	14.1774	14.7469	14.2856	14.2216	13.9401	14.7597	13.8747	13.7432	14.4722		0.50496	0.573586	-0.291973	-1.08799
A0A087WWM4;F8WAN9;H0YLV5;H0YMB3;H0YNJ6;Q9P2T1;Q9P2T1-2;Q9P2T1-3	GMPR2	Isoform of Q9P2T1. GMP reductase;Isoform of Q9P2T1. GMP reductase;Isoform of Q9P2T1. GMP reductase;Isoform of Q9P2T1. GMP reductase;Isoform of Q9P2T1. GMP reductase;GMP reductase 2;Isoform of Q9P2T1. Isoform 2 of GMP reductase 2;Isoform of Q9P2T1. Isoform 3 of GMP reductase 2	14.7801	10.9321	14.0842	13.912	12.8325	11.4317	15.6823	13.2929	15.764	14.0529	12.8252	14.0455	12.5904	12.8878	13.8967	14.5603		0.357053	0.674876	0.459389	0.819538
P49915;P49915-2	GMPS	GMP synthase [glutamine-hydrolyzing];Isoform of P49915. Isoform 2 of GMP synthase [glutamine-hydrolyzing]	11.7017	11.2103	11.9474	13.4989	13.8258	14.7178	11.9058	10.8352	14.2604	13.3493	11.7964	12.6968	13.2893	11.2492	11.5209	13.7209		0.141568	0.867315	0.280026	0.370699
P29992	GNA11	Guanine nucleotide-binding protein subunit alpha-11	12.2688	10.7318	13.089	14.1416	15.686	13.0445	13.2366	12.7498	13.5586	13.6506	12.7881	12.9459	10.7225	11.5771	13.3415	12.793		0.222154	0.794915	-0.446344	-0.549758
Q14344;Q14344-2	GNA13	Guanine nucleotide-binding protein subunit alpha-13;Isoform of Q14344. Isoform 2 of Guanine nucleotide-binding protein subunit alpha-13	13.3816	12.2854	11.0141	9.8807	9.95152	11.6484	10.0958	10.6559	11.1	9.73531	11.7818	10.4684	12.4386	11.8148	11.2395	11.4486		0.0834442	0.918147	0.139199	0.229297
P04899;P04899-4	GNAI2	Guanine nucleotide-binding protein G(i) subunit alpha-2;Isoform of P04899. Isoform sGi2 of Guanine nucleotide-binding protein G(i) subunit alpha-2	15.2473	15.1018	15.1	13.9215	15.1444	15.3466	14.7387	14.9476	15.5396	14.8069	14.4732	14.5216	14.9967	15.2829	14.5293	14.7651		0.245231	0.771754	-0.0790725	-0.598196
P63092;P63092-2;P63092-3;P63092-4;Q5JWF2;Q5JWF2-2	GNAS	Isoform of Q5JWF2. Guanine nucleotide-binding protein G(s) subunit alpha isoforms short;Isoform of Q5JWF2. Isoform Gnas-2 of Guanine nucleotide-binding protein G(s) subunit alpha isoforms short;Isoform of Q5JWF2. Isoform 3 of Guanine nucleotide-binding protein G(s) subunit alpha isoforms short;Isoform of Q5JWF2. Isoform 4 of Guanine nucleotide-binding protein G(s) subunit alpha isoforms short;Gua…	15.0259	14.8674	15.1293	14.7472	15.006	15.0135	14.8125	14.8264	14.9636	14.7306	14.5896	14.5705	14.4741	14.5085	14.9223	14.6122		1.69862	0.120308	-0.257126	-2.99738
P62873;P62873-2	GNB1	Guanine nucleotide-binding protein G(I)/G(S)/G(T) subunit beta-1;Isoform of P62873. Isoform 2 of Guanine nucleotide-binding protein G(I)/G(S)/G(T) subunit beta-1	16.1668	15.1404	15.699	15.49	15.7395	16.2477	15.2404	14.9332	15.7426	15.0962	15.4727	15.4257	15.4359	14.8959	15.6423	15.5435		0.367236	0.667963	-0.175272	-0.838779
P62879	GNB2	Guanine nucleotide-binding protein G(I)/G(S)/G(T) subunit beta-2	16.1044	17.4951	15.1126	16.0293	15.9759	15.4902	15.0935	15.1015	16.007	15.416	14.918	14.2709	15.1559	15.3286	15.7301	15.0963		0.87806	0.35464	-0.559995	-1.70266
P61952	GNG11	Guanine nucleotide-binding protein G(I)/G(S)/G(O) subunit gamma-11	14.2754	14.0793	14.2922	9.74116	13.9357	14.4733	13.6545	14.0055	14.0813	13.6531	13.5299	14.1953	13.5493	15.2468	14.0726	13.9097		0.344215	0.687905	0.472594	0.795088
Q9UBI6	GNG12	Guanine nucleotide-binding protein G(I)/G(S)/G(O) subunit gamma-12	17.7514	17.0422	17.3461	17.0033	17.2897	17.6967	17.6061	17.1936	16.8547	17.5946	16.6459	16.0303	17.2612	17.5654	16.3614	16.463		1.36236	0.194151	-0.519089	-2.46079
G3V2N0;G3V3J9;P59768	GNG2	Isoform of P59768. Guanine nucleotide-binding protein subunit gamma;Isoform of P59768. Guanine nucleotide-binding protein subunit gamma;Guanine nucleotide-binding protein G(I)/G(S)/G(O) subunit gamma-2	10.8982	10.9551	10.6313	14.8912	15.2162	10.9344	11.3178	10.6629	15.2986	14.6548	9.51396	15.0469	14.933	15.5216	14.8789	14.8125		1.60808	0.136978	2.39412	2.85092
O15228;O15228-2;Q5TBH6;Q5TBH8	GNPAT	Dihydroxyacetone phosphate acyltransferase;Isoform of O15228. Isoform 2 of Dihydroxyacetone phosphate acyltransferase;Isoform of O15228. Dihydroxyacetone phosphate acyltransferase (Fragment);Isoform of O15228. Dihydroxyacetone phosphate acyltransferase (Fragment)	16.1455	17.1291	16.7754	17.1399	17.1544	16.7599	16.4021	16.6675	16.6172	17.1851	16.8245	17.4743	17.8992	17.1264	16.9642	17.9612		1.94155	0.0840174	0.484794	3.40012
P46926	GNPDA1	Glucosamine-6-phosphate isomerase 1	15.6566	14.4287	15.4358	15.4281	15.6942	14.1049	14.3352	15.6252	15.8315	15.2802	15.2963	15.266	15.5167	13.7522	15.2589	14.9714		0.108707	0.901541	0.0580729	0.292259
P15586	GNS	N-acetylglucosamine-6-sulfatase	12.8082	12.7662	13.0107	13.2884	13.1506	12.1016	11.7182	10.7748	12.684	13.309	10.9017	13.6209	13.557	13.9478	13.2658	10.982		0.338252	0.694451	0.331198	0.783656
Q08379;Q08379-2	GOLGA2	Golgin subfamily A member 2;Isoform of Q08379. Isoform 2 of Golgin subfamily A member 2	11.9411	10.8608	11.3405	11.2938	11.8	9.86451	10.2715	10.3894	11.6615	11.1443	10.51	11.0195	11.3377	11.6239	11.3363	11.1236		0.348137	0.685904	0.249406	0.802581
Q08378	GOLGA3	Golgin subfamily A member 3	11.6014	12.3284	10.608	11.1039	11.3754	12.2601	9.32978	9.8585	11.2408	10.7375	10.2782	9.89404	11.5272	12.0349	11.6874	10.0092		0.118642	0.892513	-0.131998	-0.316361
H0Y6I0;Q13439;Q13439-3;Q13439-4;Q13439-5	GOLGA4	Isoform of Q13439. Golgin subfamily A member 4 (Fragment);Golgin subfamily A member 4;Isoform of Q13439. Isoform 3 of Golgin subfamily A member 4;Isoform of Q13439. Isoform 4 of Golgin subfamily A member 4;Isoform of Q13439. Isoform 5 of Golgin subfamily A member 4	20.0628	21.2439	16.5638	20.2381	19.1195	21.2918	20.7659	20.4459	19.4289	19.142	20.1847	18.5692	19.2682	20.4006	20.0097	20.9261		0.137021	0.871477	-0.225308	-0.360057
F8W785;O00461	GOLIM4	Isoform of O00461. Golgi integral membrane protein 4;Golgi integral membrane protein 4	11.165	11.2958	11.0252	10.441	10.4135	11.9251	9.53769	9.4467	11.5231	11.051	10.4755	11.2898	11.8103	12.349	11.5259	11.2359		1.25916	0.21771	0.751312	2.29914
F5H6U7;G3V1U5;Q9Y3E0	GOLT1B	Isoform of Q9Y3E0. Vesicle transport protein GOT1B;Isoform of Q9Y3E0. Golgi transport 1 homolog B (S. cerevisiae). isoform CRA_c;Vesicle transport protein GOT1B	13.275	12.7374	13.3736	13.5085	13.3696	12.9274	13.059	13.1765	13.0623	13.0518	13.0957	10.9715	12.6254	13.3042	13.2652	13.1172		0.506923	0.572063	-0.366753	-1.09141
Q9BXV9	GON7	EKC/KEOPS complex subunit GON7	15.2076	15.3656	14.8466	14.2618	14.3526	14.3898	15.0047	13.3416	15.4326	15.1919	14.6613	14.9637	15.4043	15.8836	14.9305	14.9484		1.20811	0.226692	0.580768	2.21944
Q9H8Y8;Q9H8Y8-2;Q9H8Y8-3	GORASP2	Golgi reassembly-stacking protein 2;Isoform of Q9H8Y8. Isoform 2 of Golgi reassembly-stacking protein 2;Isoform of Q9H8Y8. Isoform 3 of Golgi reassembly-stacking protein 2	16.0315	12.0551	15.0393	11.7641	15.3285	16.0019	15.7577	11.3668	16.1757	15.5909	15.6332	10.4122	16.1163	16.1064	15.9151	16.0771		0.770736	0.407623	1.08525	1.53137
P17174	GOT1	Aspartate aminotransferase. cytoplasmic	21.5209	21.7426	21.3909	20.9687	21.2877	21.6278	21.116	21.3726	21.7516	21.5924	20.7542	21.3183	21.3017	21.1591	20.8431	21.2545		0.522963	0.562438	-0.131524	-1.11931
P00505	GOT2	Aspartate aminotransferase. mitochondrial	21.5733	21.5297	21.6606	21.2539	20.7838	21.8512	20.7699	21.6016	22.1782	21.5758	21.551	21.9378	21.4384	21.2916	21.2387	22.098		0.943076	0.324164	0.285697	1.80525
H7C410;P35052	GPC1	Isoform of P35052. Glypican-1;Glypican-1	13.9529	14.1895	13.3832	13.7229	13.7213	14.0474	13.2484	13.4423	13.7721	13.3532	13.204	12.3291	14.2115	15.2257	13.7669	14.5468		0.101006	0.907267	0.0876812	0.273328
P21695;P21695-2	GPD1	Glycerol-3-phosphate dehydrogenase [NAD(+)]. cytoplasmic;Isoform of P21695. Isoform 2 of Glycerol-3-phosphate dehydrogenase [NAD(+)]. cytoplasmic	20.13	19.7445	19.9786	20.2956	20.5701	19.9318	20.3693	20.4832	20.2971	19.995	19.9198	20.3646	20.6946	19.5734	20.3714	20.8214		0.389656	0.649573	0.0667419	0.880693
Q8N335	GPD1L	Glycerol-3-phosphate dehydrogenase 1-like protein	18.0925	17.9104	18.0447	17.2404	17.9245	18.0501	17.9974	18.6457	18.0636	17.898	17.7975	17.8445	17.9538	17.7127	18.037	18.5107		0.0382282	0.959309	-0.0109727	-0.109683
P43304	GPD2	Glycerol-3-phosphate dehydrogenase. mitochondrial	15.7904	15.574	15.7118	15.8677	15.6011	15.669	15.4394	15.8988	15.8329	15.6713	15.6753	16.0306	15.7964	15.0787	15.6631	15.9724		0.0830311	0.91806	0.0210783	0.228247
F5H039;Q9NQX3;Q9NQX3-2	GPHN	Isoform of Q9NQX3. Gephyrin;Gephyrin;Isoform of Q9NQX3. Isoform 2 of Gephyrin	14.1368	14.44	14.272	14.1461	14.3197	14.3588	14.1473	14.0222	13.9436	14.0849	13.8674	13.985	14.243	14.2971	14.5069	14.2137		0.432806	0.6185	-0.0876606	-0.959767
A0A0A0MTS2;P06744	GPI	Isoform of P06744. Glucose-6-phosphate isomerase (Fragment);Glucose-6-phosphate isomerase	20.9216	21.0366	20.664	20.5752	20.8765	20.3662	20.3843	20.6491	21.1756	20.9671	20.3688	20.6982	20.781	19.8807	20.4065	20.5003		0.487084	0.586103	-0.0868957	-1.05664
Q92917	GPKOW	G-patch domain and KOW motifs-containing protein	10.1816	11.5695	9.82474	10.804	9.987	11.5538	11.0794	11.9953	11.9818	11.4387	14.8582	9.9436	11.1693	11.4135	10.6732	11.692		0.527749	0.558368	0.771891	1.12759
Q9HCN4;Q9HCN4-5	GPN1	GPN-loop GTPase 1;Isoform of Q9HCN4. Isoform 5 of GPN-loop GTPase 1	11.9618	14.7175	12.2713	11.4488	12.3022	12.2245	11.6107	12.0061	12.3463	11.9122	11.5756	12.2678	11.8729	14.8008	11.9416	12.0973		0.0216966	0.978899	0.0339633	0.0633366
C9JFE4;Q13098;Q13098-5;Q13098-7	GPS1	Isoform of Q13098. COP9 signalosome complex subunit 1;COP9 signalosome complex subunit 1;Isoform of Q13098. Isoform 4 of COP9 signalosome complex subunit 1;Isoform of Q13098. Isoform 2 of COP9 signalosome complex subunit 1	14.9491	15.0183	15.4961	14.5683	15.8479	15.5858	15.2092	15.8357	15.7628	15.6134	15.5101	15.2845	14.8653	15.2971	15.0118	15.8584		0.156531	0.854337	0.0866113	0.40527
P24298	GPT	Alanine aminotransferase 1	16.1629	16.942	16.1492	15.8316	16.1685	16.8141	16.6104	16.6451	16.5369	16.2304	16.1292	16.2779	16.3328	15.8531	16.2958	16.5763		0.331852	0.699139	-0.136404	-0.771332
Q8TD30	GPT2	Alanine aminotransferase 2	15.7465	16.2644	14.9347	14.0736	15.0927	15.9439	15.3825	15.4998	15.1826	16.1883	15.4247	16.313	15.6203	15.0325	15.2022	15.7612		0.276053	0.742492	0.223367	0.661263
A0A087WUQ6;P07203	GPX1	Isoform of P07203. Glutathione peroxidase;Glutathione peroxidase 1	16.8783	17.3466	17.062	17.0255	16.9206	16.7909	16.9153	16.907	17.1687	17.0521	16.8917	16.9563	17.0201	16.6559	17.159	17.2511		0.179478	0.831234	0.0385754	0.45704
A0A087X1J7;P22352	GPX3	Isoform of P22352. Glutathione peroxidase;Glutathione peroxidase 3	15.732	15.9084	16.1904	15.5755	16.0769	16.2782	15.7768	15.8692	15.6729	15.5856	15.6722	15.504	15.3996	15.8369	15.6453	15.2779		2.33786	0.051625	-0.351618	-4.09647
A0A087WT12;A0A087X2I2;P36969;P36969-2	GPX4	Isoform of P36969. Glutathione peroxidase;Isoform of P36969. Glutathione peroxidase;Phospholipid hydroperoxide glutathione peroxidase. mitochondrial;Isoform of P36969. Isoform Cytoplasmic of Phospholipid hydroperoxide glutathione peroxidase. mitochondrial	14.696	14.7655	16.4769	14.9772	16.6525	14.8511	14.5944	14.995	14.7219	16.1661	15.1232	16.184	16.4691	15.2294	15.8214	14.8638		0.43929	0.615269	0.321296	0.971482
P62993	GRB2	Growth factor receptor-bound protein 2	15.9477	15.8392	15.6414	15.9825	15.6928	15.8707	16.0385	15.7528	15.8328	15.4682	15.7845	15.4853	16.1021	15.9961	15.8888	15.4648		0.384001	0.65528	-0.0928811	-0.870176
Q9UBQ7	GRHPR	Glyoxylate reductase/hydroxypyruvate reductase	17.1576	17.1683	17.1376	17.2157	17.1312	17.3237	17.2627	17.3394	17.7276	17.5152	17.5095	17.6467	17.6589	17.5937	17.4146	17.6184	+	3.86565	0.0189091	0.368543	7.50913
Q13255;Q13255-2;Q13255-3	GRM1	Metabotropic glutamate receptor 1;Isoform of Q13255. Isoform Beta of Metabotropic glutamate receptor 1;Isoform of Q13255. Isoform 3 of Metabotropic glutamate receptor 1	11.0645	10.6635	16.5208	16.7598	16.4739	16.935	16.6549	16.6618	16.5885	16.7175	16.333	16.0574	16.7049	15.9711	16.2453	16.4026		0.534518	0.558305	1.16076	1.13928
Q9HAV7	GRPEL1	GrpE protein homolog 1. mitochondrial	14.5696	14.437	14.0996	13.3527	13.7476	13.9199	13.2715	14.4474	15.04	14.5675	14.6541	14.7117	14.5078	15.1648	14.5086	14.909	+	2.73792	0.0349041	0.777293	4.8632
F5H5I6;H0Y8R1;H0YAK1;Q12849	GRSF1	Isoform of Q12849. G-rich sequence factor 1;Isoform of Q12849. G-rich sequence factor 1 (Fragment);Isoform of Q12849. G-rich sequence factor 1 (Fragment);G-rich sequence factor 1	14.7624	14.6957	14.7774	14.9783	14.7749	14.9048	14.6744	15.0511	15.3474	15.573	15.068	15.5084	15.4254	15.0476	14.9779	15.4478	+	3.1223	0.0206809	0.472074	5.67507
P49840	GSK3A	Glycogen synthase kinase-3 alpha	16.1771	17.0864	15.2276	11.7625	15.3634	12.975	15.133	12.5546	12.5945	15.3801	12.9301	15.7467	13.2181	10.4759	18.0382	13.7044		0.211575	0.806751	-0.523932	-0.527172
P49841;P49841-2	GSK3B	Glycogen synthase kinase-3 beta;Isoform of P49841. Isoform 2 of Glycogen synthase kinase-3 beta	13.1939	12.5416	13.9587	13.5878	13.246	10.966	13.1564	13.4679	13.9711	12.7572	12.5234	12.8738	12.9406	13.5958	13.9899	12.9009		0.156338	0.854248	0.179327	0.404827
A0A0A0MS51	GSN	Isoform of P06396. Gelsolin	18.6004	18.7	18.7231	18.4114	18.6556	18.5061	18.4078	18.4224	18.5539	18.6549	18.4717	18.3881	18.6092	18.9005	19.4049	18.8607		0.587768	0.527295	0.177136	1.23018
P06396	GSN	Gelsolin	16.2818	15.946	14.0455	16.3167	16.6431	16.2724	15.9342	16.1312	15.9822	15.6892	16.0473	15.8686	15.7592	15.6649	16.9828	16.6188		0.143917	0.866503	0.130268	0.376171
P15170-2;P15170-3	GSPT1	Isoform of P15170. Isoform 2 of Eukaryotic peptide chain release factor GTP-binding subunit ERF3A;Isoform of P15170. Isoform 3 of Eukaryotic peptide chain release factor GTP-binding subunit ERF3A	13.591	14.3919	14.4184	13.4565	14.0523	13.1295	13.3488	13.4601	13.7448	14.0985	13.5051	14.0667	14.277	12.6451	13.73	14.5277		0.161266	0.849995	0.0933123	0.416072
P00390;P00390-2;P00390-3	GSR	Glutathione reductase. mitochondrial;Isoform of P00390. Isoform Cytoplasmic of Glutathione reductase. mitochondrial;Isoform of P00390. Isoform 2 of Glutathione reductase. mitochondrial	15.4752	15.4864	15.9385	15.9304	15.93	15.3768	14.9021	14.8898	15.3989	15.5211	15.2041	15.6787	15.8526	15.602	15.3026	15.4099		0.0122763	0.985668	0.00506771	0.0362065
P48637	GSS	Glutathione synthetase	15.2973	15.394	15.4797	14.7846	15.4227	15.7163	15.3706	14.8762	15.2237	14.3611	14.8444	15.0786	14.2522	15.3275	15.2566	15.1091		0.978371	0.307265	-0.36102	-1.86068
Q9Y2Q3;Q9Y2Q3-2	GSTK1	Glutathione S-transferase kappa 1;Isoform of Q9Y2Q3. Isoform 2 of Glutathione S-transferase kappa 1	15.4502	15.036	15.5594	14.9593	14.8751	15.1168	14.6868	14.675	15.2907	15.7273	14.841	15.0015	15.5985	14.949	15.0118	15.5783		0.479904	0.589638	0.204958	1.04397
P28161	GSTM2	Glutathione S-transferase Mu 2	19.0317	19.8074	19.9335	19.9636	19.8913	19.5233	19.8593	19.2855	19.0582	20.0367	19.1783	19.9364	19.7112	18.9501	19.4904	19.5475		0.648054	0.487775	-0.173341	-1.33108
P21266	GSTM3	Glutathione S-transferase Mu 3	16.2323	17.7577	17.6407	17.701	17.051	18.1443	17.2426	16.4764	16.2809	17.8566	17.153	17.3077	16.5076	17.1125	17.0177	16.3829		1.3914	0.184145	-0.328377	-2.50645
A0A0A0MR85	GSTM4	Isoform of Q03013. Glutathione S-transferase Mu 4	12.8491	14.4538	13.5131	12.9978	13.0545	13.0991	15.7944	14.0604	13.1062	14.9265	13.5598	12.4726	13.3683	13.6133	15.6125	13.1285		0.00801972	0.988674	-0.00429821	-0.023765
P78417	GSTO1	Glutathione S-transferase omega-1	19.0523	19.2214	18.9394	18.773	19.0104	19.5148	18.0299	18.7577	19.1431	18.7556	18.9925	19.139	19.0983	19.384	18.2038	18.8353		0.13994	0.869221	0.0315876	0.366897
P09211	GSTP1	Glutathione S-transferase P	19.669	19.8377	19.8894	19.6296	19.7813	19.8043	19.9848	19.4827	19.5018	19.6008	19.4652	19.671	19.5838	19.4298	19.44	19.1804	+	2.47469	0.045098	-0.275739	-4.35069
P30711	GSTT1	Glutathione S-transferase theta-1	15.5623	11.31	17.1016	13.5584	15.9756	10.5236	15.6022	15.9463	15.5073	11.2493	15.9947	10.8307	15.7948	12.0994	14.9941	16.3222		0.344774	0.687594	-0.348462	-0.796157
A0A087WY67;P0CG29;P0CG30;Q6ICJ4	GSTT2;GSTT2;GSTT2B;Em:AP000351.3	Isoform of P0CG29. Glutathione S-transferase theta-2;Glutathione S-transferase theta-2;Glutathione S-transferase theta-2B;Isoform of P0CG30. Em:AP000351.3 protein	13.7455	16.3581	12.6363	11.8312	10.196	10.5867	9.74845	13.0416	14.8745	15.8693	13.2498	10.5687	13.3357	9.9753	10.9425	14.104		0.581497	0.53063	0.596987	1.21957
A0A0C4DFM0;G3V4T6;G3V5T0	GSTZ1	Isoform of O43708. Glutathione transferase zeta 1 (Maleylacetoacetate isomerase). isoform CRA_c;Isoform of O43708. Maleylacetoacetate isomerase;Isoform of O43708. Maleylacetoacetate isomerase	15.6021	15.8774	16.6029	15.9431	16.0918	16.1875	16.1805	15.7922	15.8515	16.1643	15.8444	15.5812	15.7264	15.6347	16.1147	15.9756		0.594482	0.522798	-0.173058	-1.24152
B1ANH0;B1ANH2;B1ANH5;B1ANH6;Q16774;Q16774-2	GUK1	Isoform of Q16774. Guanylate kinase (Fragment);Isoform of Q16774. Guanylate kinase (Fragment);Isoform of Q16774. Guanylate kinase;Isoform of Q16774. Guanylate kinase;Guanylate kinase;Isoform of Q16774. Isoform 2 of Guanylate kinase	11.9798	10.1656	12.2748	12.3211	12.3025	10.3331	11.713	10.4061	12.2838	11.3933	11.8258	12.4639	12.7	12.5637	11.9969	11.8997		1.2515	0.219113	0.703848	2.28718
B8ZZL1;Q9UBP9;Q9UBP9-2;Q9UBP9-3;Q9UBP9-4	GULP1	Isoform of Q9UBP9. PTB domain-containing engulfment adapter protein 1 (Fragment);PTB domain-containing engulfment adapter protein 1;Isoform of Q9UBP9. Isoform 2 of PTB domain-containing engulfment adapter protein 1;Isoform of Q9UBP9. Isoform 3 of PTB domain-containing engulfment adapter protein 1;Isoform of Q9UBP9. Isoform 4 of PTB domain-containing engulfment adapter protein 1	15.6022	16.4597	16.2081	15.921	15.6325	16.4835	15.1402	16.0623	16.3859	15.9903	15.5293	16.1233	16.0416	17.9221	16.6545	15.5705		0.51857	0.564296	0.33848	1.11169
P46976-2	GYG1	Isoform of P46976. Isoform GN-1 of Glycogenin-1	17.2001	16.9494	17.0762	17.401	17.0547	17.1693	17.0255	17.3465	17.7363	17.4664	17.5819	17.3947	17.7315	17.8496	17.6967	17.9886	+	3.49162	0.0224	0.527882	6.53812
A0A087WU29;A0A0C4DFT7;E7EQF3;E9PD10;E9PH25;P02724;P02724-2;P02724-3;Q13030	GYPA;GYPA;GYPA;GYPA;GYPA;GYPA;GYPA;GYPA;GPErik	Isoform of P02724. Glycophorin;Isoform of P02724. Glycophorin;Isoform of P02724. Glycophorin;Isoform of P02724. Glycophorin;Isoform of P02724. Glycophorin-A;Glycophorin-A;Isoform of P02724. Isoform 2 of Glycophorin-A;Isoform of P02724. Isoform 3 of Glycophorin-A;Isoform of P02724. Glycophorin Erik I-IV	17.1973	16.7671	10.8442	17.5261	11.0048	15.0132	9.91031	15.2111	15.8463	10.0683	10.5529	17.2632	14.9148	16.4073	16.3446	9.83087		0.0649792	0.933818	-0.280722	-0.181611
P04921;P04921-2;P04921-3	GYPC	Glycophorin-C;Isoform of P04921. Isoform Glycophorin-D of Glycophorin-C;Isoform of P04921. Isoform 3 of Glycophorin-C	16.1112	16.3471	9.30844	15.2567	14.9263	15.5788	14.6032	14.7989	14.9729	14.5596	14.9614	10.6391	16.5496	17.2705	15.1046	14.7159		0.0786419	0.921549	0.230384	0.217038
P13807;P13807-2	GYS1	Glycogen [starch] synthase. muscle;Isoform of P13807. Isoform 2 of Glycogen [starch] synthase. muscle	17.4952	17.2517	17.1334	17.4503	17.1315	17.2011	17.5495	17.8128	18.1137	18.1206	17.7082	17.7061	17.6649	17.3799	17.4016	17.8672		1.74787	0.115255	0.367106	3.07781
P07305	H1F0	Histone H1.0	16.7726	17.0004	16.4026	16.2928	16.1438	16.8266	16.4687	16.7763	16.5932	16.8259	16.7114	16.7713	17.1106	17.6523	17.508	16.9638		1.40677	0.180728	0.43156	2.53066
Q92522	H1FX	Histone H1x	13.9605	16.68	14.6834	14.3583	14.8286	14.4693	14.1478	14.258	14.5063	14.3545	14.286	14.434	14.5987	14.7733	15.1749	14.2407		0.13753	0.871351	-0.12718	-0.361253
O75367;O75367-2;O75367-3	H2AFY	Core histone macro-H2A.1;Isoform of O75367. Isoform 1 of Core histone macro-H2A.1;Isoform of O75367. Isoform 3 of Core histone macro-H2A.1	15.8389	15.9989	15.7896	15.4082	15.687	15.89	15.4976	15.5518	15.8664	15.4327	15.7186	15.7416	15.8667	16.4323	16.0968	15.667		0.513477	0.568355	0.145007	1.10283
Q9P0M6	H2AFY2	Core histone macro-H2A.2	10.0789	13.8769	9.72684	10.1237	8.86139	14.3856	10.8632	13.5182	13.5838	11.8898	11.6062	12.8545	14.0653	13.9965	10.9364	13.9789		0.899636	0.346483	1.43458	1.73678
P0C0S5;Q71UI9	H2AFZ;H2AFV	Histone H2A.Z;Histone H2A.V	15.9742	15.9135	14.8654	14.2363	14.7235	10.9844	14.8814	15.534	15.3559	14.3588	15.8594	14.8603	14.734	15.3446	16.193	15.1891		0.427488	0.622261	0.597802	0.950127
B4DEB1;K7EK07;K7EMV3;K7ES00;P68431;P84243;Q16695;Q71DI3	H3F3A;H3F3B;H3F3B;H3F3B;HIST1H3A;H3F3A;HIST3H3;HIST2H3A	Isoform of P84243. Histone H3;Isoform of P84243. Histone H3 (Fragment);Isoform of P84243. Histone H3;Isoform of P84243. Histone H3.3 (Fragment);Histone H3.1;Histone H3.3;Histone H3.1t;Histone H3.2	19.3315	19.2508	19.0912	18.7511	19.2436	19.2495	18.964	19.138	19.4426	19.0963	19.3177	18.7276	19.3501	19.6143	19.7298	19.4453		1.16269	0.240408	0.21301	2.1486
O95479;R4GMU1	H6PD	GDH/6PGL endoplasmic bifunctional protein;Isoform of O95479. GDH/6PGL endoplasmic bifunctional protein	13.7335	13.1138	13.7133	13.8648	13.106	13.2155	13.5625	13.9255	13.4071	13.067	13.2235	13.5017	13.1791	13.1305	13.7435	14.0438		0.653266	0.485445	-0.117342	-1.33972
A0A0A0MSE2;A0A0D9SFP2;E9PF18;Q16836;Q16836-2;Q16836-3	HADH	Isoform of Q16836. Hydroxyacyl-coenzyme A dehydrogenase. mitochondrial;Isoform of Q16836. Hydroxyacyl-coenzyme A dehydrogenase. mitochondrial;Isoform of Q16836. Hydroxyacyl-coenzyme A dehydrogenase. mitochondrial;Hydroxyacyl-coenzyme A dehydrogenase. mitochondrial;Isoform of Q16836. Isoform 2 of Hydroxyacyl-coenzyme A dehydrogenase. mitochondrial;Isoform of Q16836. Isoform 3 of Hydroxyacyl-coenzy…	20.3719	20.4279	20.6155	19.6714	19.7271	20.6862	19.5447	20.0522	20.5221	20.2933	20.0094	20.2909	20.1935	20.1767	20.4596	20.2566		0.311554	0.712252	0.138138	0.731855
P40939	HADHA	Trifunctional enzyme subunit alpha. mitochondrial	20.2085	20.1485	19.9649	19.3787	19.7152	20.2585	19.8667	20.1376	20.3064	20.3034	19.7371	20.3065	19.9041	19.8456	20.2864	20.3272		0.553507	0.545787	0.16727	1.17191
P55084	HADHB	Trifunctional enzyme subunit beta. mitochondrial	21.2583	21.2097	21.3182	20.7554	20.9627	21.4106	21.1735	21.4008	21.475	21.4719	20.8826	21.6054	21.1056	20.8854	21.4637	21.4085		0.273821	0.743684	0.101089	0.656755
Q16775;Q16775-2	HAGH	Hydroxyacylglutathione hydrolase. mitochondrial;Isoform of Q16775. Isoform 2 of Hydroxyacylglutathione hydrolase. mitochondrial	18.6661	18.7649	18.7386	18.8359	18.9781	19.0256	18.8	18.5505	18.4294	18.1583	18.3401	18.6597	18.9498	18.697	18.857	18.1877		1.97765	0.078991	-0.260117	-3.46137
P12081;P12081-4	HARS	Histidine--tRNA ligase. cytoplasmic;Isoform of P12081. Isoform 4 of Histidine--tRNA ligase. cytoplasmic	12.3662	14.612	13.5137	14.1122	13.6542	13.7153	13.2999	13.5172	13.8728	13.6369	13.469	14.3329	14.1136	13.4791	13.7993	13.9385		0.411419	0.635819	0.231419	0.920822
P49590;P49590-2	HARS2	Probable histidine--tRNA ligase. mitochondrial;Isoform of P49590. Isoform 2 of Probable histidine--tRNA ligase. mitochondrial	11.7984	12.2087	12.0649	14.4303	11.0277	13.8792	14.4453	11.7	14.0415	13.9453	12.001	12.3115	13.8599	11.6114	12.3078	14.1027		0.16045	0.850078	0.328323	0.414214
O00165;O00165-2;O00165-5	HAX1	HCLS1-associated protein X-1;Isoform of O00165. Isoform 2 of HCLS1-associated protein X-1;Isoform of O00165. Isoform 5 of HCLS1-associated protein X-1	12.4882	10.5536	8.10704	10.657	13.9138	13.3896	8.75475	11.5011	13.2252	13.1099	12.6712	13.3186	11.8249	13.5566	13.1335	12.1846		1.15614	0.243298	1.70742	2.13838
P69905	HBA1	Hemoglobin subunit alpha	26.3954	26.1447	26.1167	26.9146	26.1954	25.8847	25.9284	25.3825	25.6036	25.2992	26.1478	26.1965	26.27	26.22	26.6078	26.1081		0.102998	0.905261	-0.0636671	-0.278246
P68871	HBB	Hemoglobin subunit beta	27.2841	27.2447	26.9897	27.5956	26.9812	26.7211	26.6157	26.1412	26.354	26.0039	26.5683	26.9039	26.9083	27.0893	27.2936	26.8433		0.330534	0.699351	-0.20107	-0.768788
P02042	HBD	Hemoglobin subunit delta	26.3823	26.1639	26.1715	26.9199	26.1338	25.8439	25.4548	25.3176	25.5366	25.245	25.8634	26.1835	26.2734	26.4349	26.6719	26.1981		0.00271943	0.997043	0.00237894	0.00810699
P69891	HBG1	Hemoglobin subunit gamma-1	20.2373	18.9279	24.1351	24.8036	20.8427	16.9447	18.0945	22.8995	18.8077	19.3616	18.115	18.2217	21.0848	18.4348	19.507	21.1588		0.664529	0.476614	-1.52423	-1.35834
P69892	HBG2	Hemoglobin subunit gamma-2	18.0514	17.7003	18.1416	16.6458	19.8848	16.3306	17.863	9.64294	17.818	15.9624	17.778	15.47	19.9842	16.5103	17.6363	16.0429		0.159559	0.850646	0.367685	0.412185
Q6B0K9	HBM	Hemoglobin subunit mu	11.7297	11.3645	9.99015	10.0532	11.4634	9.51277	10.4017	10.043	8.78468	11.2044	10.9954	9.91317	11.2202	9.81903	9.0054	10.7368		0.347884	0.685313	-0.359928	-0.802097
P09105	HBQ1	Hemoglobin subunit theta-1	14.8351	11.1853	13.9914	14.2259	14.1905	10.9536	11.7783	10.4352	11.1464	9.81803	13.3152	13.6714	14.4524	9.69176	13.7251	11.288		0.42235	0.626636	-0.560851	-0.940786
Q9Y450	HBS1L	HBS1-like protein	14.3922	14.0407	14.628	10.7443	14.8762	14.6095	15.3072	14.1245	14.5584	15.0017	13.1349	10.3905	14.4205	14.5917	10.0481	14.2218		0.548242	0.549026	-0.794397	-1.16289
P53701	HCCS	Cytochrome c-type heme lyase	14.0172	13.5803	13.8577	14.291	14.0067	14.0828	13.825	13.7889	14.6915	14.5679	14.282	14.2523	14.4907	14.3621	14.2145	14.5275	+	2.5336	0.0421935	0.492368	4.46261
A0A024R1R8;Q9Y2S6	hCG_2014768;TMA7	HCG2014768. isoform CRA_a;Translation machinery-associated protein 7	17.301	16.3087	15.5356	10.0837	10.0385	11.4731	10.695	16.3992	17.5031	11.3152	10.5047	15.3805	10.0153	18.1984	17.9142	16.9216		0.308159	0.716232	1.23976	0.725192
Q7Z4H3;Q7Z4H3-2	HDDC2	HD domain-containing protein 2;Isoform of Q7Z4H3. Isoform 2 of HD domain-containing protein 2	15.32	15.9267	16.0365	15.4698	15.6737	16.0979	15.7439	15.6831	15.6647	15.4627	15.4917	15.2034	15.8091	16.3403	15.8905	15.9186		0.0616715	0.938385	-0.0213304	-0.172907
H0YNP9;Q8N4P3;Q8N4P3-2	HDDC3	Isoform of Q8N4P3. Guanosine-3'.5'-bis(diphosphate) 3'-pyrophosphohydrolase MESH1;Guanosine-3'.5'-bis(diphosphate) 3'-pyrophosphohydrolase MESH1;Isoform of Q8N4P3. Isoform 2 of Guanosine-3'.5'-bis(diphosphate) 3'-pyrophosphohydrolase MESH1	15.4538	15.4182	15.4	14.8856	15.2353	16.3719	16.2495	15.3024	15.7023	15.3257	16.0595	15.0216	15.2858	15.2526	16.0572	15.1663		0.11597	0.895208	-0.0557127	-0.309913
P51858	HDGF	Hepatoma-derived growth factor	16.4833	16.5244	16.5419	16.4148	16.9158	16.6515	16.2253	16.5513	16.6953	16.6763	16.1189	16.4896	17.3951	17.528	16.8064	16.9726		1.16708	0.238882	0.296718	2.15544
Q7Z4V5;Q7Z4V5-2;Q7Z4V5-3;Q7Z4V5-4	HDGFL2	Hepatoma-derived growth factor-related protein 2;Isoform of Q7Z4V5. Isoform 2 of Hepatoma-derived growth factor-related protein 2;Isoform of Q7Z4V5. Isoform 3 of Hepatoma-derived growth factor-related protein 2;Isoform of Q7Z4V5. Isoform 4 of Hepatoma-derived growth factor-related protein 2	13.7486	15.2	15.6897	10.1638	14.7223	11.4872	10.6881	15.226	15.3307	14.6004	11.6245	14.6487	12.4293	15.458	14.1119	12.3871		0.148417	0.862187	0.458109	0.386606
Q9H0R4	HDHD2	Haloacid dehalogenase-like hydrolase domain-containing protein 2	14.5714	14.3127	14.0294	14.0147	14.1821	14.1588	14.283	14.3697	14.4115	14.1284	14.0586	14.2903	14.2927	14.3351	14.6288	14.2679		0.383758	0.655041	0.0614283	0.869724
Q9BSH5	HDHD3	Haloacid dehalogenase-like hydrolase domain-containing protein 3	13.8516	12.3124	14.3571	10.5166	10.1544	13.2228	11.1536	13.5154	11.4015	13.16	12.6248	13.5846	14.529	13.9144	14.6708	12.7399		0.48678	0.585391	0.942641	1.0561
Q9BXW7;Q9BXW7-2	HDHD5	Haloacid dehalogenase-like hydrolase domain-containing 5;Isoform of Q9BXW7. Isoform 1 of Haloacid dehalogenase-like hydrolase domain-containing 5	14.5008	14.686	15.0978	14.3192	14.1819	14.6606	14.2242	14.5429	15.1572	15.0346	15.223	14.8417	14.9499	14.6033	14.6389	14.7322		2.15752	0.0668916	0.370928	3.77274
A0A024R4E5;Q00341;Q00341-2	HDLBP	Isoform of Q00341. High density lipoprotein binding protein (Vigilin). isoform CRA_a;Vigilin;Isoform of Q00341. Isoform 2 of Vigilin	14.1454	13.5716	15.4084	15.1023	14.7482	14.7754	15.0102	12.3065	14.2405	14.8159	14.0335	15.7497	14.6799	13.5904	14.307	13.8215		0.0191705	0.979918	0.0212908	0.0561148
Q9NRV9	HEBP1	Heme-binding protein 1	19.0827	19.4886	18.9221	17.9425	18.8716	18.7665	19.0109	15.192	15.2216	18.9497	18.7339	18.9069	18.9828	15.5518	19.8243	19.1931		0.101169	0.907575	-0.239092	-0.27373
Q9Y5Z4	HEBP2	Heme-binding protein 2	19.0093	19.4589	19.707	19.0372	19.4257	19.3584	18.8929	18.7578	19.1059	19.1219	18.3914	19.2061	19.1948	19.7706	18.687	18.6202		0.489418	0.584565	-0.193672	-1.06074
A0A087X2H1;Q9ULT8	HECTD1	Isoform of Q9ULT8. E3 ubiquitin-protein ligase HECTD1;E3 ubiquitin-protein ligase HECTD1	14.5864	10.5542	11.4092	11.6893	11.985	11.948	12.0933	9.6746	12.3881	12.578	12.1512	11.4354	11.8987	12.319	12.2736	12.4237		0.363772	0.66965	0.440989	0.832247
Q5T447;Q5T447-2	HECTD3	E3 ubiquitin-protein ligase HECTD3;Isoform of Q5T447. Isoform 2 of E3 ubiquitin-protein ligase HECTD3	11.6617	10.2325	11.8385	12.001	12.4955	12.2527	12.464	11.401	11.7645	12.2428	12.2308	12.101	12.6918	12.1128	10.6563	12.6361		0.280105	0.739343	0.261134	0.669428
A0A087WSW0;A6NFD8;A6NFD8-4	HELT	Isoform of A6NFD8. Hairy and enhancer of split-related protein HELT;Hairy and enhancer of split-related protein HELT;Isoform of A6NFD8. Isoform 2 of Hairy and enhancer of split-related protein HELT	15.8563	15.7887	11.9423	10.1176	10.173	15.5554	15.3949	15.4333	14.8466	10.9566	15.3629	11.7702	11.3971	15.3546	15.8089	15.1027		0.0169057	0.980794	0.0422419	0.0496073
H0Y9B6;H0YA83;P07686;Q5URX0	HEXB;HEXB;HEXB;HEL-248	Isoform of P07686. Beta-hexosaminidase subunit beta (Fragment);Isoform of P07686. Beta-hexosaminidase subunit beta (Fragment);Beta-hexosaminidase subunit beta;Isoform of P07686. Beta-hexosaminidase subunit beta	11.1929	9.47066	10.3482	10.708	9.84557	12.4192	11.2662	12.2374	10.7657	10.8496	11.2256	12.1247	10.2858	13.6636	12.6378	12.589		2.02928	0.0752941	0.831701	3.54965
J3QKL0;Q8WVB3;Q8WVB3-2	HEXDC	Isoform of Q8WVB3. Hexosaminidase D;Hexosaminidase D;Isoform of Q8WVB3. Isoform 2 of Hexosaminidase D	11.2076	11.5709	11.6315	9.86293	12.2384	11.1421	10.3845	12.0096	10.5071	10.0412	10.4808	11.0772	10.0986	11.456	11.4322	11.5579		0.453196	0.606968	-0.424564	-0.996471
Q9BTY7	HGH1	Protein HGH1 homolog	12.9716	10.8859	14.1394	9.49376	13.0382	10.7919	14.3479	14.1409	10.7231	13.6784	13.2822	14.0114	13.5476	13.8976	12.8487	14.4775		0.441682	0.614509	0.832124	0.975795
O14964;O14964-2	HGS	Hepatocyte growth factor-regulated tyrosine kinase substrate;Isoform of O14964. Isoform 2 of Hepatocyte growth factor-regulated tyrosine kinase substrate	14.0759	16.2089	10.6723	13.8674	13.4744	13.1665	13.59	13.2386	14.1262	13.8413	12.8834	14.3875	13.8464	13.7125	14.0186	13.9183		0.287841	0.734137	0.305015	0.684934
Q9HCP6	HHATL	Protein-cysteine N-palmitoyltransferase HHAT-like protein	14.2372	14.6782	14.6265	14.641	14.7717	14.2031	14.1215	15.0295	14.6911	15.2715	15.1343	15.2083	14.4341	14.2712	14.0635	15.0502		0.967697	0.312792	0.22692	1.84393
P31937	HIBADH	3-hydroxyisobutyrate dehydrogenase. mitochondrial	19.0395	18.8501	18.9836	18.5691	18.3343	18.6318	18.1546	18.6675	19.2466	18.9734	18.7033	18.8391	18.6627	18.4135	18.5862	18.7395		0.63266	0.492875	0.116715	1.3055
Q6NVY1	HIBCH	3-hydroxyisobutyryl-CoA hydrolase. mitochondrial	17.2651	17.3329	17.0073	17.1019	17.263	17.0863	17.0135	17.1744	17.6006	17.6677	16.6774	17.2455	17.3483	16.8264	17.52	17.5567		0.682401	0.466134	0.149755	1.38776
Q9NWT6	HIF1AN	Hypoxia-inducible factor 1-alpha inhibitor	15.3949	9.42923	16.9569	16.9256	16.8905	15.3248	15.3787	14.8515	14.2536	15.6807	12.6393	18.0007	16.3524	16.5752	15.471	15.1514		0.135242	0.873008	0.371511	0.355877
Q9BW72	HIGD2A	HIG1 domain family member 2A. mitochondrial	17.5339	17.4193	16.5943	15.7645	16.2798	16.9797	16.7487	16.8548	17.5605	17.0252	17.0895	16.5196	16.002	16.8279	16.0842	16.2187		0.239419	0.777704	-0.105895	-0.586101
Q53FT3	HIKESHI	Protein Hikeshi	16.3873	15.1377	15.2818	15.2875	15.3929	15.7875	15.295	16.4097	15.8304	15.2992	15.6107	15.3096	15.3784	15.6312	15.3691	15.0607		0.44477	0.614107	-0.186263	-0.981351
P49773	HINT1	Histidine triad nucleotide-binding protein 1	18.9953	18.9921	19.3278	19.1928	19.5929	19.4513	19.2519	18.8992	19.3904	19.2398	19.0811	19.498	19.7366	19.7638	19.2335	19.3265		1.33747	0.197509	0.195808	2.42172
Q9BX68	HINT2	Histidine triad nucleotide-binding protein 2. mitochondrial	17.4684	17.1769	16.9265	18.093	16.2861	16.9301	16.8006	17.0545	17.1567	18.4122	17.0739	18.1989	17.5379	17.0953	17.0322	17.0535		0.90141	0.345993	0.353062	1.73959
Q9NQE9	HINT3	Histidine triad nucleotide-binding protein 3	15.3087	15.7929	15.6532	14.8699	15.3693	15.0918	14.8333	14.8678	15.2489	15.2248	15.0505	15.7571	14.7494	14.9302	14.3711	15.0165		0.447116	0.611775	-0.179827	-0.985568
P16401	HIST1H1B	Histone H1.5	21.3021	21.1896	21.7946	22.0829	21.675	21.2746	20.833	20.7448	17.2459	21.1044	20.8371	21.5728	20.834	18.2357	16.1941	21.0819		1.42391	0.175884	-1.72386	-2.55769
P16403	HIST1H1C	Histone H1.2	20.0254	20.1984	19.7449	19.4835	20.0667	20.2843	19.623	18.7669	19.9242	19.4088	18.3038	19.9553	18.9016	20.0809	19.1092	18.4876		1.26625	0.215238	-0.502731	-2.31022
P10412	HIST1H1E	Histone H1.4	20.9942	20.9042	21.436	20.7599	21.3352	20.9751	20.511	20.4263	21.0561	20.7949	20.499	21.2446	21.1349	22.0899	21.2108	20.8069		0.368353	0.667729	0.186906	0.840881
P06899;P23527;P33778;Q16778;Q8N257	HIST1H2BJ;HIST1H2BO;HIST1H2BB;HIST2H2BE;HIST3H2BB	Histone H2B type 1-J;Histone H2B type 1-O;Histone H2B type 1-B;Histone H2B type 2-E;Histone H2B type 3-B	17.6099	18.0329	17.4246	16.8041	18.0372	16.651	16.4783	17.332	16.6226	17.006	17.7119	16.8397	17.0701	17.4603	17.7629	16.448		0.226531	0.790292	-0.181035	-0.55903
O60814;P57053;P58876;P62807;Q5QNW6;Q5QNW6-2;Q93079;Q99877;Q99879;Q99880;U3KQK0	HIST1H2BK;H2BFS;HIST1H2BD;HIST1H2BC;HIST2H2BF;HIST2H2BF;HIST1H2BH;HIST1H2BN;HIST1H2BM;HIST1H2BL;HIST1H2BN	Histone H2B type 1-K;Histone H2B type F-S;Histone H2B type 1-D;Histone H2B type 1-C/E/F/G/I;Histone H2B type 2-F;Isoform of Q5QNW6. Isoform 2 of Histone H2B type 2-F;Histone H2B type 1-H;Histone H2B type 1-N;Histone H2B type 1-M;Histone H2B type 1-L;Isoform of Q99877. Histone H2B	20.0172	19.7625	20.1955	19.8005	20.2616	20.1301	19.7354	19.8648	20.0641	19.946	20.3542	20.0067	20.2174	20.3254	20.5922	20.3525		1.44596	0.171023	0.261364	2.59252
A0A0U1RR32;A0A0U1RRH7;P04908;P0C0S8;P16104;P20671;Q7L7L0;Q93077;Q96KK5;Q99878;Q9BTM1	HIST1H3D;HIST1H3D;HIST1H2AB;HIST1H2AG;H2AFX;HIST1H2AD;HIST3H2A;HIST1H2AC;HIST1H2AH;HIST1H2AJ;H2AFJ	Isoform of P68431. Histone H2A;Isoform of P68431. Histone H2A;Histone H2A type 1-B/E;Histone H2A type 1;Histone H2AX;Histone H2A type 1-D;Histone H2A type 3;Histone H2A type 1-C;Histone H2A type 1-H;Histone H2A type 1-J;Histone H2A.J	20.9755	20.7197	21.0431	20.5916	21.0488	20.8434	20.5385	20.6253	20.8278	20.9018	20.777	20.9446	21.0711	21.2063	21.3071	20.939		0.882047	0.3523	0.198584	1.70897
P62805	HIST1H4A	Histone H4	19.876	19.7313	20.1494	19.6593	20.1344	19.8543	19.609	19.6892	19.9664	19.8772	19.7249	19.8107	20.1442	20.1213	20.2854	19.9815		0.681925	0.46625	0.15107	1.38698
P19367;P19367-2;P19367-3;P19367-4	HK1	Hexokinase-1;Isoform of P19367. Isoform 2 of Hexokinase-1;Isoform of P19367. Isoform 3 of Hexokinase-1;Isoform of P19367. Isoform 4 of Hexokinase-1	16.7105	16.6765	16.6242	16.6778	16.7302	16.488	16.041	16.7863	17.0262	17.0399	17.038	17.2404	17.1125	16.5584	16.5946	17.2966	+	3.67439	0.0167059	0.396485	6.99951
E9PB90;P52789	HK2	Isoform of P52789. Hexokinase-2;Hexokinase-2	11.746	11.8499	10.3561	11.12	10.3977	13.2939	10.9507	10.1628	10.2238	11.2705	12.9204	9.63554	10.8596	11.9425	13.5112	12.8012		0.249639	0.768753	0.410933	0.607326
A0A140T975;A0A1W2PS39;P10314;P30459;Q9GJ45	HLA-A	Isoform of P01891. HLA class I histocompatibility antigen. A-3 alpha chain;Isoform of P01891. HLA class I histocompatibility antigen. A-3 alpha chain;Isoform of P01891. HLA class I histocompatibility antigen. A-32 alpha chain;Isoform of P01891. HLA class I histocompatibility antigen. A-74 alpha chain;Isoform of P01891. HLA class I histocompatibility antigen. A-3 alpha chain	11.2555	11.7977	10.0208	9.78529	16.0115	15.1957	15.1245	13.6033	10.7102	12.7917	13.4352	13.0103	15.8052	15.6328	14.5327	13.8999		0.785522	0.400085	0.877986	1.55515
P05534;P30447	HLA-A	Isoform of P01891. HLA class I histocompatibility antigen. A-24 alpha chain;Isoform of P01891. HLA class I histocompatibility antigen. A-23 alpha chain	16.5855	16.2954	16.782	16.2903	16.5135	15.6434	15.1371	16.2491	16.9737	16.1236	16.122	16.7989	16.4653	16.4326	15.8154	16.251		0.495442	0.579499	0.18576	1.07133
P30486	HLA-B	Isoform of Q31612. HLA class I histocompatibility antigen. B-48 alpha chain	15.0152	15.0079	14.6069	13.898	14.6407	14.3929	14.2371	14.6031	15.0141	14.4306	14.4921	14.0669	15.454	15.1185	14.8364	15.2637		0.82991	0.375742	0.284312	1.62616
A0A140T921;A0A140T9H5;A0A140T9U8;A2AEA2;O19617;P10321	HLA-C	Isoform of Q95604. HLA class I histocompatibility antigen. Cw-6 alpha chain;Isoform of Q95604. HLA class I histocompatibility antigen. Cw-6 alpha chain;Isoform of Q95604. HLA class I histocompatibility antigen. Cw-6 alpha chain;Isoform of Q95604. HLA class I histocompatibility antigen. Cw-6 alpha chain;Isoform of Q95604. HLA class I antigen;Isoform of Q95604. HLA class I histocompatibility antige…	10.4681	10.4123	11.835	12.82	11.0958	11.1211	10.8557	10.6407	12.8688	10.7503	13.0352	12.1915	14.0465	10.8491	13.777	10.5468		1.13603	0.249885	1.10206	2.10703
Q95604	HLA-C	HLA class I histocompatibility antigen. Cw-17 alpha chain	11.2871	14.7896	9.91217	11.0586	11.6872	10.5891	15.0065	14.8127	11.3687	15.438	11.9016	12.4346	10.5234	11.4574	15.3617	14.48		0.672515	0.472676	0.477826	1.3715
A0A0G2JMH6;P01903	HLA-DRA	Isoform of P01903. HLA class II histocompatibility antigen. DR alpha chain;HLA class II histocompatibility antigen. DR alpha chain	14.24	13.9728	13.9298	13.6161	13.6741	14.9493	14.3127	13.9908	13.7122	13.7803	14.3386	13.661	13.9889	14.7787	14.0518	13.93		0.204132	0.810989	-0.0554913	-0.51113
P01911	HLA-DRB1	HLA class II histocompatibility antigen. DRB1-15 beta chain	14.32	13.6039	14.7311	10.8029	14.7608	14.7562	13.0533	13.6889	13.5837	14.1887	14.9232	9.69421	14.3955	17.9476	10.7985	13.9288		0.0195722	0.980585	-0.032106	-0.0572659
P13760	HLA-DRB1	Isoform of P01911. HLA class II histocompatibility antigen. DRB1-4 beta chain	15.0795	10.6304	12.0215	13.0511	14.413	14.2294	13.4291	13.0798	15.1643	10.1512	9.29097	14.431	14.7701	15.0021	13.8484	12.6627		0.0628087	0.937103	-0.0766184	-0.175905
A0A0D9SFW8;P30511;P30511-3	HLA-F	Isoform of P30511. HLA class I histocompatibility antigen. alpha chain F (Fragment);HLA class I histocompatibility antigen. alpha chain F;Isoform of P30511. Isoform 3 of HLA class I histocompatibility antigen. alpha chain F	16.514	16.1489	16.3421	16.1623	16.9781	16.9411	16.5893	16.2104	16.7186	16.0246	16.0335	16.2238	16.9367	17.1717	16.591	16.3639		0.130969	0.878827	0.0222044	0.345792
P50747	HLCS	Biotin--protein ligase	12.439	10.5225	10.2292	10.4193	10.5527	12.4129	9.85067	9.90026	10.5064	10.8909	10.5688	10.6342	10.7345	10.1859	12.9638	10.5343		0.052427	0.948568	0.0865177	0.148305
F5H345;P08397;P08397-2	HMBS	Isoform of P08397. Porphobilinogen deaminase;Porphobilinogen deaminase;Isoform of P08397. Isoform 2 of Porphobilinogen deaminase	18.457	17.8406	18.7189	18.3611	18.698	19.004	20.0009	19.2239	18.8971	18.9465	19.4151	18.4214	18.8647	19.1231	19.5275	19.2795		0.821341	0.380263	0.271304	1.61249
Q8NDA2	HMCN2	Hemicentin-2	11.8187	12.0687	11.4425	9.44666	12.365	11.7587	10.9132	11.0413	10.0858	10.6027	9.36	9.58303	11.7944	12.091	13.2937	12.9924		0.0813762	0.918754	-0.131447	-0.22403
P17096;P17096-3	HMGA1	High mobility group protein HMG-I/HMG-Y;Isoform of P17096. Isoform HMG-R of High mobility group protein HMG-I/HMG-Y	15.9166	15.7604	15.902	15.7871	16.86	16.5835	15.8374	15.6043	16.166	16.2111	15.7563	16.2554	16.5115	16.8852	16.2488	16.3827		1.14871	0.244831	0.270718	2.1268
P09429;Q5T7C4	HMGB1	High mobility group protein B1;Isoform of P09429. High mobility group protein B1	18.2024	18.3356	18.7826	18.0649	18.8866	18.5342	18.1941	17.3485	18.4564	18.6197	17.8672	18.5667	18.0077	18.3748	18.0861	17.9436		0.0951921	0.910384	-0.0533257	-0.258886
P26583	HMGB2	High mobility group protein B2	17.8105	17.9012	19.0483	18.437	18.9965	18.143	18.0319	17.6651	17.6674	18.3411	17.4278	18.3277	18.1907	17.6646	17.3539	17.8005		0.937763	0.326534	-0.407491	-1.79689
P35914	HMGCL	Hydroxymethylglutaryl-CoA lyase. mitochondrial	14.8152	14.4984	15.349	11.5513	14.7207	15.0205	14.4426	15.3498	15.5149	14.1566	14.9782	14.6819	14.0802	14.9077	13.5496	14.4041		0.0487555	0.952652	0.0657216	0.138417
P54868	HMGCS2	Hydroxymethylglutaryl-CoA synthase. mitochondrial	11.1441	14.7187	11.991	11.2994	11.4234	10.8655	13.4515	11.5457	10.8151	15.0026	11.208	15.2862	13.1546	10.0459	13.982	15.5284		0.774071	0.407394	1.07293	1.53674
A6NEL0;A6NL93;P05114	HMGN1	Isoform of P05114. Non-histone chromosomal protein HMG-14;Isoform of P05114. Non-histone chromosomal protein HMG-14;Non-histone chromosomal protein HMG-14	13.6393	13.3341	13.7281	13.5572	13.6416	14.0025	13.5126	13.092	14.2291	13.8252	13.5474	14.1754	14.0273	15.5416	14.1618	13.9103		2.07792	0.0711323	0.613828	3.63362
P05204	HMGN2	Non-histone chromosomal protein HMG-17	15.4395	15.1663	14.8026	15.1007	11.6016	15.8958	15.0921	15.2128	15.4352	15.4747	14.8557	15.966	15.9523	17.0064	16.2461	15.1541		0.998805	0.300371	0.972349	1.89271
A0A087WZE9	HMGN3	Isoform of Q15651. High mobility group nucleosome-binding domain-containing protein 3	15.4542	15.32	15.9147	15.2803	15.4997	15.7502	15.1628	15.5398	15.6746	15.8805	15.5319	15.788	15.9886	16.711	15.9235	16.2364		1.87552	0.0920803	0.476607	3.28908
O00479	HMGN4	High mobility group nucleosome-binding domain-containing protein 4	14.1504	13.8608	14.3629	13.1714	14.145	13.857	13.8143	13.6382	14.4601	14.0063	12.1056	14.1313	14.7175	15.515	14.6431	14.4215		0.408852	0.636357	0.375053	0.916115
P82970	HMGN5	High mobility group nucleosome-binding domain-containing protein 5	12.325	10.7827	9.81923	11.2132	9.66424	14.2165	12.9952	10.7131	12.9588	14.4685	9.52344	10.0098	10.2623	13.6285	12.2293	10.494		0.165551	0.848092	0.230665	0.425793
P09601	HMOX1	Heme oxygenase 1	12.7565	11.4596	12.9526	12.3828	12.8617	11.4607	14.2375	10.0096	13.0421	12.8192	11.5057	12.8124	10.5525	12.2509	12.609	9.50056		0.357414	0.674721	-0.378573	-0.820222
A0A087WT44;P30519	HMOX2	Isoform of P30519. Heme oxygenase 2;Heme oxygenase 2	13.9559	13.8563	11.6549	15.2174	12.6586	12.0573	12.8339	14.0451	14.4641	14.3831	14.2106	12.9719	13.7253	14.0075	13.7842	14.0715		0.639213	0.491932	0.667348	1.3164
Q13151	HNRNPA0	Heterogeneous nuclear ribonucleoprotein A0	12.4199	11.3213	12.7346	12.507	12.3867	12.2055	11.9489	12.4203	12.3099	12.3616	11.8308	12.0255	12.6436	12.5609	12.4316	12.525		0.171756	0.840408	0.0931054	0.439779
F8W6I7;P09651;P09651-2;P09651-3	HNRNPA1	Isoform of P09651. Heterogeneous nuclear ribonucleoprotein A1;Heterogeneous nuclear ribonucleoprotein A1;Isoform of P09651. Isoform A1-A of Heterogeneous nuclear ribonucleoprotein A1;Isoform of P09651. Isoform 2 of Heterogeneous nuclear ribonucleoprotein A1	15.9839	16.1063	16.3146	16.1724	16.2377	16.2997	15.9134	16.1033	15.9492	16.1431	16.1315	16.0715	16.0914	16.2525	16.0038	16.0936		0.766029	0.409494	-0.0493293	-1.52378
P22626	HNRNPA2B1	Heterogeneous nuclear ribonucleoproteins A2/B1	16.5499	16.4427	16.2708	16.29	16.3846	16.2607	16.3144	16.4553	16.7691	16.7406	16.9475	16.1335	16.7914	17.2501	16.9085	16.4278		1.58741	0.141956	0.375049	2.81772
P51991	HNRNPA3	Heterogeneous nuclear ribonucleoprotein A3	16.3187	16.0148	16.273	16.1268	16.0519	15.9047	16.2137	16.171	16.2111	16.0557	16.3892	15.8189	15.7965	16.2438	16.4226	16.1131		0.0126819	0.985001	-0.00294983	-0.0373861
Q99729-3	HNRNPAB	Isoform of Q99729. Isoform 3 of Heterogeneous nuclear ribonucleoprotein A/B	13.1807	15.0573	12.8024	12.5457	13.1123	13.8358	12.5797	12.6436	12.9426	12.5778	12.8982	12.854	12.9203	13.6931	13.3366	12.7829		0.265124	0.751	-0.218983	-0.639103
B2R5W2;B4DY08;G3V4C1;G3V4W0;P07910-2	HNRNPC	Isoform of P07910. Heterogeneous nuclear ribonucleoproteins C1/C2;Isoform of P07910. Heterogeneous nuclear ribonucleoproteins C1/C2;Isoform of P07910. Heterogeneous nuclear ribonucleoproteins C1/C2;Isoform of P07910. Heterogeneous nuclear ribonucleoproteins C1/C2 (Fragment);Isoform of P07910. Isoform C1 of Heterogeneous nuclear ribonucleoproteins C1/C2	15.5062	16.0589	16.0022	16.5756	17.0424	16.659	15.6197	15.5815	15.4191	16.87	16.1623	15.6926	16.2397	16.7216	16.4514	16.3581		0.174682	0.837578	0.108666	0.446339
Q14103;Q14103-3	HNRNPD	Heterogeneous nuclear ribonucleoprotein D0;Isoform of Q14103. Isoform 3 of Heterogeneous nuclear ribonucleoprotein D0	16.2256	16.2818	16.6779	16.2688	16.6513	16.4608	16.0244	16.1077	16.3861	16.3845	16.4013	16.5047	16.3731	16.8809	16.6099	16.0525		0.468483	0.59646	0.111828	1.02374
A0A087WUK2;O14979;O14979-2;O14979-3	HNRNPDL	Isoform of O14979. Heterogeneous nuclear ribonucleoprotein D-like;Heterogeneous nuclear ribonucleoprotein D-like;Isoform of O14979. Isoform 2 of Heterogeneous nuclear ribonucleoprotein D-like;Isoform of O14979. Isoform 3 of Heterogeneous nuclear ribonucleoprotein D-like	16.1073	15.8964	16.7865	16.6611	16.6351	16.1875	16.6569	16.3041	16.5013	16.5637	16.4197	16.5543	16.8394	17.0071	16.2758	16.3083		0.438981	0.615062	0.154322	0.970924
P52597	HNRNPF	Heterogeneous nuclear ribonucleoprotein F	14.3803	14.4371	13.8765	13.7928	13.7618	13.1665	12.6381	13.9183	14.2396	13.091	13.5346	13.0297	13.874	14.3872	13.8694	13.4363		0.0715611	0.927622	-0.0636933	-0.198781
G8JLB6;P31943	HNRNPH1	Isoform of P31943. Heterogeneous nuclear ribonucleoprotein H;Heterogeneous nuclear ribonucleoprotein H	15.9198	15.864	16.125	15.8172	15.9491	15.8934	15.7836	15.8013	16.0201	15.9803	15.9547	15.7349	15.7735	15.8166	16.094	15.5463		0.16972	0.842922	-0.0291202	-0.435202
P55795	HNRNPH2	Heterogeneous nuclear ribonucleoprotein H2	13.3446	14.6407	12.2076	12.3336	13.1491	12.9314	13.1415	13.1183	13.0216	13.291	13.3114	14.1432	14.1785	13.2168	14.4657	13.1164		0.647614	0.487491	0.48472	1.33035
P31942;P31942-2	HNRNPH3	Heterogeneous nuclear ribonucleoprotein H3;Isoform of P31942. Isoform 2 of Heterogeneous nuclear ribonucleoprotein H3	14.9644	14.9718	14.9201	14.9052	15.4047	14.9093	14.8594	14.8925	14.8503	14.7464	15.0132	14.7881	15.0971	15.5192	15.2959	14.7641		0.0981922	0.908336	0.0308683	0.266354
P61978;P61978-2	HNRNPK	Heterogeneous nuclear ribonucleoprotein K;Isoform of P61978. Isoform 2 of Heterogeneous nuclear ribonucleoprotein K	18.0451	17.8327	18.1456	17.738	17.9462	18.0675	17.872	18.073	18.224	17.994	18.0646	17.8844	18.2212	18.7689	18.3718	18.0515		1.40929	0.180246	0.23252	2.53463
P14866	HNRNPL	Heterogeneous nuclear ribonucleoprotein L	14.8117	14.9578	15.1493	14.7772	15.0393	14.9914	14.6339	13.8619	14.8339	14.9035	14.8008	15.0793	15.0222	14.9817	15.1662	14.895		0.568533	0.537164	0.182519	1.19755
A0A087X0X3;P52272;P52272-2	HNRNPM	Isoform of P52272. Heterogeneous nuclear ribonucleoprotein M;Heterogeneous nuclear ribonucleoprotein M;Isoform of P52272. Isoform 2 of Heterogeneous nuclear ribonucleoprotein M	16.0779	14.9919	16.4381	15.9486	16.2364	16.1619	15.7156	14.9297	16.2725	16.2224	16.105	16.267	16.3956	16.371	16.317	16.1705		1.28505	0.211586	0.452615	2.33962
O43390	HNRNPR	Heterogeneous nuclear ribonucleoprotein R	15.5139	15.5384	15.9866	15.6893	15.8847	15.8122	15.3699	15.6087	15.6279	15.2565	15.3521	15.3579	15.552	15.6663	15.6405	15.5576		0.892573	0.348815	-0.174113	-1.72562
Q00839	HNRNPU	Heterogeneous nuclear ribonucleoprotein U	17.2568	17.4188	17.7113	16.8472	17.3676	17.3831	16.955	16.9189	17.1854	16.9053	16.8247	16.9731	16.9341	17.03	17.1363	16.8389		1.064	0.270825	-0.253851	-1.99465
A0A0A0MRA5;B7Z4B8;Q9BUJ2;Q9BUJ2-2;Q9BUJ2-4	HNRNPUL1	Isoform of Q9BUJ2. Heterogeneous nuclear ribonucleoprotein U-like protein 1;Isoform of Q9BUJ2. Heterogeneous nuclear ribonucleoprotein U-like protein 1;Heterogeneous nuclear ribonucleoprotein U-like protein 1;Isoform of Q9BUJ2. Isoform 2 of Heterogeneous nuclear ribonucleoprotein U-like protein 1;Isoform of Q9BUJ2. Isoform 4 of Heterogeneous nuclear ribonucleoprotein U-like protein 1	11.7772	13.1995	13.5496	14.3173	12.8643	13.534	12.5782	12.0339	12.174	12.303	11.3872	12.9239	13.4459	12.5296	12.6599	13.2139		0.455861	0.607154	-0.402086	-1.00124
Q1KMD3	HNRNPUL2	Heterogeneous nuclear ribonucleoprotein U-like protein 2	15.0298	15.0803	15.5868	14.7174	15.5105	15.7257	14.8171	14.7966	14.9182	15.3106	14.5992	14.8223	15.4798	15.1905	15.2402	15.0853		0.182517	0.828447	-0.0772547	-0.463789
Q86YM7	HOMER1	Homer protein homolog 1	13.8864	12.7694	13.4596	13.6737	13.3755	13.1655	13.9376	13.6174	13.8471	13.5855	13.0767	13.2482	13.4706	13.6792	13.6788	13.143		0.0408035	0.957989	-0.0194709	-0.116766
Q9NSC5;Q9NSC5-2;Q9NSC5-5	HOMER3	Homer protein homolog 3;Isoform of Q9NSC5. Isoform 2 of Homer protein homolog 3;Isoform of Q9NSC5. Isoform 5 of Homer protein homolog 3	14.1135	14.2409	11.2799	14.8072	14.4883	12.2337	12.3991	13.5114	13.9493	14.2556	9.59118	14.2601	14.2812	14.1957	13.3239	12.3348		0.100422	0.906773	-0.110278	-0.271883
Q86VS8	HOOK3	Protein Hook homolog 3	13.8878	13.8153	13.6354	14.2208	14.0799	14.1338	13.7611	13.8526	14.0317	13.9265	13.4924	14.0922	14.1958	14.2531	13.8756	13.7435		0.253158	0.763115	0.0280308	0.614587
P00738	HP	Haptoglobin	17.7266	18.7263	18.4269	19.8432	18.4826	18.6413	19.2533	18.8399	17.0881	18.6257	18.6718	18.6697	17.7926	19.3186	19.909	18.8197		0.225372	0.791625	-0.130606	-0.55658
Q5SSJ5	HP1BP3	Heterochromatin protein 1-binding protein 3	15.2078	14.9604	15.2959	14.9407	15.2868	15.3425	15.1376	15.025	15.228	15.2537	15.0157	15.0814	15.6357	15.4795	15.029	15.0692		0.469743	0.596842	0.0744402	1.02597
P37235	HPCAL1	Hippocalcin-like protein 1	11.0266	11.3621	11.2358	9.84598	13.5911	9.71551	11.185	10.9886	12.6434	13.2246	12.4295	10.9006	13.0402	13.0721	12.5325	13.773		2.17425	0.0648199	1.58313	3.80227
P00492	HPRT1	Hypoxanthine-guanine phosphoribosyltransferase	13.6625	14.3116	13.5617	13.776	12.9452	13.9915	13.9333	13.9972	14.4218	12.3492	14.6435	14.0226	14.4242	15.1278	14.8175	14.4585		0.657984	0.482469	0.51075	1.34752
P02790	HPX	Hemopexin	18.4218	18.3314	18.5202	18.6834	18.7812	18.2499	17.3411	17.7166	17.7605	17.9375	17.6558	18.5804	18.2873	18.6376	18.3529	17.9822		0.190034	0.824104	-0.106421	-0.480384
M0QZ43;P23327	HRC	Isoform of P23327. Sarcoplasmic reticulum histidine-rich calcium-binding protein;Sarcoplasmic reticulum histidine-rich calcium-binding protein	19.6733	19.7903	19.8298	19.4687	20.0046	20.1167	18.955	19.7201	20.0444	19.4024	19.2898	19.9701	20.0109	21.027	19.7601	19.7625		0.538516	0.556186	0.213606	1.14617
P04196	HRG	Histidine-rich glycoprotein	15.5786	15.6767	15.2749	16.2275	15.7415	14.5327	15.0116	14.3734	15.193	14.302	14.9821	15.2287	15.2696	15.1175	15.0433	14.1865		0.953311	0.317606	-0.386779	-1.82134
O75506	HSBP1	Heat shock factor-binding protein 1	15.6743	15.9977	14.5368	14.9304	15.9041	14.1955	14.2576	9.6637	13.7904	14.2459	12.5507	14.768	14.3202	15.6338	15.6323	14.2553		0.00184551	0.997802	0.00454485	0.00550721
Q8IWL3	HSCB	Iron-sulfur cluster co-chaperone protein HscB. mitochondrial	12.4279	15.2868	12.1028	16.1435	12.3487	10.6176	14.1731	12.7762	13.1921	13.0829	13.2785	12.3929	13.1497	12.7081	12.8311	13.226		0.137064	0.872052	-0.251918	-0.360158
Q99714	HSD17B10	3-hydroxyacyl-CoA dehydrogenase type-2	17.5772	17.6933	17.9987	17.6607	17.4635	17.872	17.4573	17.6063	17.9159	18.2291	17.6366	17.8359	17.8738	17.4292	17.6676	17.8894		0.535097	0.558565	0.143551	1.14028
P51659	HSD17B4	Peroxisomal multifunctional enzyme type 2	12.6857	12.2633	12.3706	11.7322	12.5164	12.8491	11.904	12.7444	12.8029	12.4387	14.5555	12.5798	12.0798	11.9819	12.1837	12.7067		0.38401	0.655628	0.282902	0.870194
Q92506	HSD17B8	Estradiol 17-beta-dehydrogenase 8	16.1449	15.8462	16.0784	15.8849	15.8362	16.2563	15.6924	15.8824	16.1172	16.3895	15.2365	16.4927	16.2735	15.9527	16.2782	16.3768		0.453836	0.606752	0.186914	0.997618
Q6YN16	HSDL2	Hydroxysteroid dehydrogenase-like protein 2	18.0843	17.9594	18.2075	17.3831	17.4055	18.4924	17.7447	18.1588	18.577	18.3336	17.9191	18.363	17.8939	17.8993	18.0547	18.0861		0.565341	0.539745	0.211367	1.19212
P07900;P07900-2	HSP90AA1	Heat shock protein HSP 90-alpha;Isoform of P07900. Isoform 2 of Heat shock protein HSP 90-alpha	17.2613	17.4184	17.881	17.5154	17.9548	17.7884	17.405	17.2067	17.5971	18.1709	17.4676	17.9584	18.1211	17.7417	17.572	18.1655		1.01661	0.289098	0.295426	1.92057
P08238	HSP90AB1	Heat shock protein HSP 90-beta	20.2853	20.4252	20.4132	20.2184	20.6411	20.5463	20.2998	20.296	20.5969	20.5285	20.3869	20.4368	20.7652	20.5412	20.5449	20.8023		1.68749	0.121603	0.184676	2.97929
Q58FF8	HSP90AB2P	Putative heat shock protein HSP 90-beta 2	15.8085	15.9465	16.3851	15.9157	16.2281	16.0461	16.0629	15.7289	16.057	15.8668	16.0593	16.5178	16.0892	15.8778	15.9742	15.8143		0.057921	0.942511	0.0168297	0.162975
P14625	HSP90B1	Endoplasmin	15.9556	15.643	15.4984	16.0785	15.6572	15.526	15.6424	15.6401	16.1386	15.9445	15.8533	15.9336	15.8233	16.4629	16.159	16.1777		1.79341	0.107926	0.356512	3.1527
A0A1B0GTF3;O43301	HSPA12A	Isoform of O43301. Heat shock 70 kDa protein 12A;Heat shock 70 kDa protein 12A	12.1179	13.5898	12.9821	12.588	12.2876	14.6191	12.1585	10.7115	13.4719	12.5747	14.0517	13.3115	12.2009	13.2348	13.385	13.5623		0.57955	0.531986	0.592293	1.21627
Q5JX83;Q96MM6	HSPA12B	Isoform of Q96MM6. Heat shock 70 kDa protein 12B;Heat shock 70 kDa protein 12B	10.041	14.6227	12.2747	11.1362	10.3679	13.205	13.8602	10.3681	13.9985	11.9064	10.4761	13.4723	12.3624	11.4558	10.6731	11.2072		0.0146321	0.982091	-0.0405161	-0.0430426
A0A0G2JIW1;P0DMV8;P0DMV9	HSPA1B;HSPA1A;HSPA1B	Isoform of P0DMV9. Heat shock 70 kDa protein 1B;Heat shock 70 kDa protein 1A;Heat shock 70 kDa protein 1B	20.1899	20.5527	20.2206	20.2016	20.2924	20.6533	20.2714	20.362	20.2812	20.3934	20.0249	20.2586	20.4059	20.0165	20.2036	20.2553		0.644665	0.488668	-0.113049	-1.32546
P34931;Q53FA3	HSPA1L	Heat shock 70 kDa protein 1-like;Isoform of P34931. HSPA1L (Fragment)	17.4822	16.1	18.1734	18.2967	17.7465	17.6786	17.4381	18.1694	17.1476	17.6101	16.3404	17.8776	17.9223	18.0193	17.5912	17.3859		0.169907	0.842935	-0.148813	-0.435622
P54652	HSPA2	Heat shock-related 70 kDa protein 2	17.6706	18.6971	17.7757	19.6622	19.4838	18.5935	18.5994	17.7674	17.5166	18.636	17.3234	19.5444	18.9629	18.1866	18.4421	17.4789	+	2.51383	0.0421667	-0.269841	-4.42488
P34932	HSPA4	Heat shock 70 kDa protein 4	17.4681	17.3488	17.4627	17.2482	17.5988	17.4843	17.2069	16.7926	17.0528	17.1377	16.4555	17.2929	17.2483	16.968	16.8699	16.6436		1.90857	0.0863306	-0.367722	-3.34451
O95757	HSPA4L	Heat shock 70 kDa protein 4L	15.053	10.5042	16.0412	14.7444	14.7607	13.8338	13.2128	13.3716	13.4573	14.3429	14.0539	15.9619	15.4565	13.349	13.8872	16.5269		0.422474	0.627105	0.689238	0.941012
P11021	HSPA5	78 kDa glucose-regulated protein	17.1562	17.1569	17.0161	16.8559	17.3084	17.2012	16.4193	16.8241	17.3211	16.9952	16.8041	16.919	17.3792	17.871	17.0767	16.9461		0.731646	0.432457	0.171801	1.46817
P17066	HSPA6	Heat shock 70 kDa protein 6	21.3467	21.5843	21.2959	21.8152	21.6825	21.1602	21.555	21.2151	21.3432	21.5775	21.5411	21.422	21.6612	21.3195	21.6524	21.5725		0.286743	0.733844	0.0542958	0.682738
P11142	HSPA8	Heat shock cognate 71 kDa protein	20.9486	21.0157	21.1389	21.1425	21.2697	21.1616	20.9312	20.597	20.8321	20.8203	20.7072	20.7298	20.9764	20.6753	20.6898	20.6697		2.29132	0.0526957	-0.263092	-4.01174
P38646	HSPA9	Stress-70 protein. mitochondrial	19.7895	19.6754	19.8091	19.4518	19.2316	19.6754	19.1534	19.748	20.1989	19.9866	19.9068	20.0627	19.808	20.2411	19.9536	20.05	+	3.20369	0.0217	0.459199	5.85783
P04792	HSPB1	Heat shock protein beta-1	22.2441	22.7456	22.4516	22.7898	23.0433	22.535	22.4436	22.18	21.9076	22.3364	21.7614	22.3569	22.7984	22.7041	22.3718	22.0021		1.70049	0.120735	-0.274277	-3.00042
A8KAH6;Q16082	HSPB2-C11orf52;HSPB2	Heat shock 27kDa protein 2. isoform CRA_a;Heat shock protein beta-2	19.6487	19.3633	19.4586	19.1555	19.5413	19.7424	19.0318	19.0716	19.2794	18.7638	18.5491	19.2037	19.6677	20.2393	19.7469	19.0524		0.125306	0.885595	-0.063853	-0.332336
Q12988	HSPB3	Heat shock protein beta-3	15.9781	15.3608	15.6585	15.9163	16.1195	15.8445	15.7871	15.7358	15.5817	15.5691	15.744	15.7102	16.1503	16.2758	16.5425	15.8613		0.469567	0.596683	0.12929	1.02566
O14558	HSPB6	Heat shock protein beta-6	21.5416	22.1086	22.1141	21.7101	22.1302	22.7154	21.8669	21.8266	21.5971	22.0185	21.7216	22.1719	22.4973	23.0261	22.0377	21.5916		0.324531	0.703432	0.0810533	0.757163
Q9UBY9	HSPB7	Heat shock protein beta-7	16.7869	16.7027	16.4565	16.6894	16.6235	16.4946	16.8006	16.4303	16.4606	16.6558	16.1741	16.8208	16.7326	17.1827	17.0957	16.7396		0.416834	0.631529	0.109675	0.930728
Q9UBY9-2	HSPB7	Isoform of Q9UBY9. Isoform 2 of Heat shock protein beta-7	20.1852	20.9442	20.5227	20.5628	20.6855	20.7465	20.658	20.5134	20.4751	20.4232	20.2716	20.6908	20.8017	21.3759	20.5153	20.8491		0.229521	0.786795	0.0730541	0.565342
Q9UJY1	HSPB8	Heat shock protein beta-8	17.7662	18.2687	18.3119	18.2712	18.4765	18.412	18.2678	17.9267	17.9671	18.3565	17.8512	18.6148	18.6981	19.3368	18.3094	18.4156		0.845738	0.367988	0.231069	1.65137
Q9NZL4;Q9NZL4-2;Q9NZL4-3	HSPBP1	Hsp70-binding protein 1;Isoform of Q9NZL4. Isoform 2 of Hsp70-binding protein 1;Isoform of Q9NZL4. Isoform 3 of Hsp70-binding protein 1	13.518	12.911	13.8882	13.3227	13.3154	13.7794	12.7984	13.3531	14.1425	13.8342	13.6371	14.0854	13.6459	13.7858	13.5107	13.791		1.77958	0.110884	0.443301	3.1299
P10809	HSPD1	60 kDa heat shock protein. mitochondrial	18.835	19.1073	18.9742	18.3123	18.2627	18.7136	18.3435	18.9172	19.3967	19.2519	18.8582	19.3006	19.0577	18.4204	18.6827	19.0156		1.07224	0.268733	0.314773	2.00751
P61604	HSPE1	10 kDa heat shock protein. mitochondrial	20.3809	20.3873	20.1449	19.8293	19.7157	20.3546	19.8483	20.4633	21.2742	20.8531	20.4198	20.8754	20.6332	21.4687	20.5626	21.1295	+	3.85026	0.0193846	0.761557	7.46707
P98160	HSPG2	Basement membrane-specific heparan sulfate proteoglycan core protein	16.6272	16.8321	16.6777	16.7203	16.5766	16.8491	17.0256	16.5633	16.622	16.6643	16.8373	16.7011	16.6079	16.7117	17.439	16.9506		0.489986	0.584844	0.0827253	1.06174
A0A0A0MSM0;Q92598;Q92598-2;Q92598-3;Q92598-4	HSPH1	Isoform of Q92598. Heat shock protein 105 kDa;Heat shock protein 105 kDa;Isoform of Q92598. Isoform Beta of Heat shock protein 105 kDa;Isoform of Q92598. Isoform 3 of Heat shock protein 105 kDa;Isoform of Q92598. Isoform 4 of Heat shock protein 105 kDa	13.0168	9.69745	10.6989	11.1401	12.4389	12.6619	12.7084	12.4817	12.6904	12.0188	11.5229	13.3126	11.2821	13.4383	12.7816	10.693		0.295185	0.72979	0.361959	0.699561
O43719	HTATSF1	HIV Tat-specific factor 1	13.4748	13.766	12.4513	13.4649	13.0077	13.7186	13.259	13.7386	13.8503	13.6104	13.4431	12.8912	13.4944	14.0782	13.8413	13.7391		0.754909	0.414833	0.258408	1.50584
A0A087WTC8;L0R6P0;P86397	HTD2;RPP14;HTD2	Isoform of P86397. Hydroxyacyl-thioester dehydratase type 2. mitochondrial (Fragment);Isoform of P86397. Alternative protein RPP14;Hydroxyacyl-thioester dehydratase type 2. mitochondrial	10.0081	12.4598	15.2289	15.6477	11.1492	15.2648	15.2375	11.6156	15.4319	15.6809	11.2759	16.2419	15.2884	10.1795	10.0459	15.2921		0.0816506	0.918854	0.353085	0.22473
A0A0C4DG44;O43464;O43464-3	HTRA2	Isoform of O43464. Serine protease HTRA2. mitochondrial (Fragment);Serine protease HTRA2. mitochondrial;Isoform of O43464. Isoform 3 of Serine protease HTRA2. mitochondrial	14.8141	15.0827	14.5489	14.6804	14.8127	14.345	13.8515	14.264	14.1459	14.9126	14.7653	15.2476	14.4681	13.8436	14.4015	14.907		0.0709892	0.927742	0.0365282	0.197297
Q7Z6Z7;Q7Z6Z7-2;Q7Z6Z7-3	HUWE1	E3 ubiquitin-protein ligase HUWE1;Isoform of Q7Z6Z7. Isoform 2 of E3 ubiquitin-protein ligase HUWE1;Isoform of Q7Z6Z7. Isoform 3 of E3 ubiquitin-protein ligase HUWE1	16.2557	15.8205	16.3498	15.9902	16.0095	17.2479	16.7162	11.8204	12.409	16.0721	12.1464	12.3271	16.5166	12.5284	16.9057	15.8937		0.62134	0.501112	-1.42639	-1.28661
Q9Y4L1	HYOU1	Hypoxia up-regulated protein 1	13.935	17.1107	13.1903	13.2989	14.5231	14.9537	17.0653	13.9067	14.1347	14.8779	13.3042	14.0731	14.1666	14.0798	13.6155	15.5945		0.391816	0.647452	-0.517193	-0.884698
Q9NX55	HYPK	Huntingtin-interacting protein K	13.7931	14.7615	14.1846	13.6038	13.5542	12.9713	12.946	12.7737	12.5252	13.2719	13.0924	13.8853	13.3735	14.0802	12.7691	13.1293		0.432516	0.618232	-0.307674	-0.959241
Q2TAA2	IAH1	Isoamyl acetate-hydrolyzing esterase 1 homolog	16.6904	16.8139	16.8337	16.0917	16.3865	16.7529	16.6312	16.3962	16.8982	16.3152	16.6443	16.6252	16.6377	16.6569	16.5702	16.5179		0.112844	0.898631	0.0336602	0.302337
A0A0A0MSX9;J3KR24;P41252	IARS	Isoform of P41252. Isoleucine--tRNA ligase. cytoplasmic;Isoform of P41252. Isoleucine--tRNA ligase. cytoplasmic;Isoleucine--tRNA ligase. cytoplasmic	12.1596	12.5605	11.2114	11.5375	13.5513	9.69491	10.2998	9.65931	11.7235	11.0461	12.1085	9.40621	9.82328	10.5306	10.6466	12.118		0.239447	0.777943	-0.408924	-0.586159
Q9NSE4	IARS2	Isoleucine--tRNA ligase. mitochondrial	15.3399	15.3127	15.7303	15.0256	15.1829	15.3921	14.86	15.2987	15.6938	15.5095	15.1603	15.6108	15.429	15.4248	15.3818	15.5669		0.819119	0.381686	0.204331	1.60895
Q5T440	IBA57	Putative transferase CAF17. mitochondrial	16.6695	15.7286	16.806	15.721	12.6758	16.2348	15.3885	15.4721	16.7668	15.5749	16.4811	13.4719	15.2677	14.2261	15.2458	15.5491		0.200542	0.813986	-0.264112	-0.503346
E7ESS4;P05362	ICAM1	Isoform of P05362. Intercellular adhesion molecule 1;Intercellular adhesion molecule 1	12.8627	12.7292	14.1314	13.2945	13.5779	13.8643	13.2138	12.8546	13.7796	14.1706	13.2963	13.6157	14.0238	14.4821	12.838	14.0419		0.885269	0.350421	0.464985	1.71407
P14735	IDE	Insulin-degrading enzyme	16.1731	15.9406	16.3832	15.9987	16.2093	16.0131	15.637	15.6459	16.0887	15.9812	15.5525	15.9534	15.9231	15.4655	15.4936	15.7105		1.11053	0.25798	-0.22907	-2.06726
O75874	IDH1	Isocitrate dehydrogenase [NADP] cytoplasmic	16.9809	17.2169	17.0553	17.18	17.2577	17.333	17.0913	16.8929	17.3036	17.1776	16.7055	17.3143	17.1357	16.8304	16.9202	17.0152		0.342407	0.689395	-0.0756915	-0.791627
P48735	IDH2	Isocitrate dehydrogenase [NADP]. mitochondrial	22.0144	21.9631	22.1125	21.686	21.4207	22.309	21.6693	22.0186	22.6327	22.4743	22.1619	22.4113	21.9258	21.8481	22.1696	22.4464		1.47599	0.166743	0.359548	2.64007
P50213	IDH3A	Isocitrate dehydrogenase [NAD] subunit alpha. mitochondrial	17.9548	17.5439	16.9289	17.4255	16.4904	17.2268	16.9482	17.7258	18.558	17.8911	17.7051	17.9799	17.5367	17.5296	17.867	18.0493	+	3.30025	0.0208889	0.609052	6.07994
O43837-2	IDH3B	Isoform of O43837. Isoform A of Isocitrate dehydrogenase [NAD] subunit beta. mitochondrial	14.8454	14.8082	13.6658	14.0413	13.939	14.6014	13.9894	14.4075	15.2899	14.9517	14.5244	15.3114	14.8437	14.6595	14.3584	14.9471		2.25176	0.0548919	0.573531	3.94038
P51553	IDH3G	Isocitrate dehydrogenase [NAD] subunit gamma. mitochondrial	14.2346	13.9937	13.5373	13.5219	12.8569	13.3174	13.2242	13.8117	14.716	14.5051	13.7302	14.7402	14.1654	13.4751	14.1039	14.3256	+	2.4346	0.0466667	0.657975	4.27538
Q13907;Q13907-2	IDI1	Isopentenyl-diphosphate Delta-isomerase 1;Isoform of Q13907. Isoform 2 of Isopentenyl-diphosphate Delta-isomerase 1	15.5019	14.9092	15.9809	15.8197	16.4145	16.5061	15.7569	15.5839	15.5715	15.1647	15.986	16.5684	16.2859	15.6987	15.7497	15.9408		0.14987	0.86111	0.0615791	0.389962
Q9BXS1	IDI2	Isopentenyl-diphosphate delta-isomerase 2	16.067	15.9598	16.7886	15.3392	16.1867	16.5074	16.1437	15.7775	15.9966	14.5007	15.5746	15.7475	15.6652	15.5867	15.4732	14.7834		1.7851	0.110212	-0.680259	-3.139
Q16666;Q16666-2;Q16666-3;Q16666-6	IFI16	Gamma-interferon-inducible protein 16;Isoform of Q16666. Isoform 2 of Gamma-interferon-inducible protein 16;Isoform of Q16666. Isoform 3 of Gamma-interferon-inducible protein 16;Isoform of Q16666. Isoform 4 of Gamma-interferon-inducible protein 16	13.2756	12.8709	10.1328	10.4094	11.9773	10.7122	12.555	13.0673	13.1612	13.7645	13.0676	11.8601	13.526	12.6273	13.0986	13.2535		1.89026	0.0890526	1.16979	3.31376
Q01628	IFITM3	Interferon-induced transmembrane protein 3	18.8602	19.1917	18.9432	18.5977	19.6474	19.5375	18.6334	17.8242	19.2517	18.993	16.6811	18.7452	19.1272	19.053	18.3903	18.4863		0.452813	0.607198	-0.313445	-0.995785
P78318	IGBP1	Immunoglobulin-binding protein 1	11.857	12.4813	11.5231	11.3978	11.4452	11.4687	12.2969	11.8736	12.3897	12.3816	12.4594	11.0148	11.6174	12.9289	12.5385	12.5594		1.14788	0.244722	0.443268	2.1255
P11717	IGF2R	Cation-independent mannose-6-phosphate receptor	11.2896	11.0591	12.8726	14.3063	10.4476	12.049	11.5799	12.2866	12.229	11.1741	10.8883	11.2049	12.9056	12.6859	11.0079	11.3862		0.193538	0.820793	-0.301089	-0.48807
P35858;P35858-2	IGFALS	Insulin-like growth factor-binding protein complex acid labile subunit;Isoform of P35858. Isoform 2 of Insulin-like growth factor-binding protein complex acid labile subunit	12.201	11.0694	11.6331	9.434	11.751	12.1265	11.6418	9.57257	11.2127	11.6397	11.6317	11.9009	9.89959	11.5928	10.476	11.5772		0.0403734	0.957907	0.06264	0.115585
P24593	IGFBP5	Insulin-like growth factor-binding protein 5	13.4117	13.6774	14.3977	12.7605	13.5948	10.3676	10.8143	13.6452	14.0267	9.11833	9.2575	13.693	10.4597	13.7657	9.20242	11.0652		0.719684	0.439755	-1.51007	-1.44872
Q16270;Q16270-2	IGFBP7	Insulin-like growth factor-binding protein 7;Isoform of Q16270. Isoform 2 of Insulin-like growth factor-binding protein 7	12.9923	11.7822	14.8389	9.64731	14.5413	10.0225	12.2627	15.6936	15.1314	15.6417	11.7411	14.3631	14.8498	15.3122	12.2139	13.2466		0.564033	0.540014	1.3399	1.18989
Q86VF2-5	IGFN1	Isoform of Q86VF2. Isoform 5 of Immunoglobulin-like and fibronectin type III domain-containing protein 1	14.2921	13.6021	10.0985	10.2693	11.0808	9.63897	11.054	9.82763	14.3746	13.0388	14.127	12.858	12.4484	13.1035	12.6694	10.946		1.73838	0.11686	1.71278	3.06227
A0A286YEY1;P01876	IGHA1	Isoform of P01876. Immunoglobulin heavy constant alpha 1 (Fragment);Immunoglobulin heavy constant alpha 1	20.6006	20.5065	19.6802	21.0389	20.1982	18.9851	20.1706	18.4173	20.3776	19.919	19.119	20.6003	20.1491	19.1015	20.6567	19.355		0.0759063	0.924117	-0.0398946	-0.210011
A0A0G2JMB2	IGHA2	Isoform of P01877. Immunoglobulin heavy constant alpha 2 (Fragment)	19.4774	19.324	18.2061	19.758	18.4586	17.8813	18.9687	17.3221	19.3126	18.6769	18.3076	19.2821	18.7921	18.2536	19.763	18.4495		0.367945	0.668125	0.180141	0.840113
A0A0A0MS08;P01857	IGHG1	Isoform of P01857. Immunoglobulin heavy constant gamma 1 (Fragment);Immunoglobulin heavy constant gamma 1	22.0492	22.6282	21.8553	22.4447	22.3079	21.2949	21.4679	20.7586	21.8384	21.7082	21.5577	22.1263	22.4557	21.357	22.3787	21.6167		0.0467453	0.953402	0.029012	0.132975
A0A286YEY4;P01859	IGHG2	Isoform of P01859. Immunoglobulin heavy constant gamma 2 (Fragment);Immunoglobulin heavy constant gamma 2	20.1994	20.4331	19.7563	20.0401	19.4825	19.1697	20.0092	18.7339	19.8635	20.1135	18.9753	19.8084	19.1845	18.9968	20.6643	19.6971		0.12007	0.891345	-0.0650949	-0.319797
A0A286YES1;P01860	IGHG3	Isoform of P01860. Immunoglobulin heavy constant gamma 3 (Fragment);Immunoglobulin heavy constant gamma 3	16.9651	18.4349	16.801	17.2676	17.4085	16.5345	15.5951	15.656	16.9285	17.9211	15.7616	16.8283	17.395	16.0494	16.2124	16.7005		0.179092	0.831638	-0.108236	-0.456181
A0A286YFJ8;P01861	IGHG4	Isoform of P01861. Immunoglobulin heavy constant gamma 4 (Fragment);Immunoglobulin heavy constant gamma 4	17.4573	17.8479	15.7777	18.4389	16.9082	14.9641	18.8901	16.0676	17.2373	16.4896	14.9916	18.0822	16.8602	15.737	19.0709	16.5055		0.304172	0.718868	-0.17216	-0.717343
A0A1B0GUU9;P01871;P01871-2	IGHM	Isoform of P01871. Immunoglobulin heavy constant mu (Fragment);Immunoglobulin heavy constant mu;Isoform of P01871. Isoform 2 of Immunoglobulin heavy constant mu	18.6896	17.9305	16.5605	16.9705	18.2316	16.3937	16.6115	15.225	18.2241	17.0537	16.4302	16.9346	18.316	17.1142	17.6034	16.9781		0.372358	0.666873	0.255183	0.848408
A0A0C4DH31;P23083	IGHV1-18;IGHV1-2	Immunoglobulin heavy variable 1-18;Immunoglobulin heavy variable 1-2	14.0622	14.9676	10.5722	14.4947	14.0421	14.279	13.7305	12.4335	13.7612	12.4053	13.1909	14.6097	14.6746	13.3307	14.0576	14.661		0.175712	0.836155	0.263644	0.448641
A0A0B4J2H0;A0A0C4DH29;P01742;P01743;P0DP01	IGHV1-69D;IGHV1-3;IGHV1-69;IGHV1-46;IGHV1-8	Immunoglobulin heavy variable 1-69D;Immunoglobulin heavy variable 1-3;Immunoglobulin heavy variable 1-69;Immunoglobulin heavy variable 1-46;Immunoglobulin heavy variable 1-8	11.6642	11.769	13.2764	13.7967	13.0587	13.2719	9.53448	9.29718	11.1036	11.8309	9.72306	13.4851	13.9045	12.4728	13.551	12.3198		0.158216	0.851644	0.340273	0.409122
P01780	IGHV3-7	Immunoglobulin heavy variable 3-7	16.7659	16.4423	15.9408	16.1169	16.33	15.6748	15.8343	15.1676	16.276	15.2076	15.7612	15.155	15.53	15.4073	15.9734	16.0686		0.756742	0.413909	-0.361701	-1.5088
A0A0C4DH38	IGHV5-51	Immunoglobulin heavy variable 5-51	15.8466	15.4237	15.6512	15.9506	15.3665	14.4678	14.7659	14.0634	15.1688	14.5913	14.5538	15.3202	14.7252	14.4832	15.091	14.6885		0.870142	0.357008	-0.364233	-1.69011
P01834	IGKC	Immunoglobulin kappa constant	22.1386	22.5667	21.3053	22.1437	21.7019	20.9795	21.6804	20.6458	21.7134	21.5286	21.2549	21.4762	21.5418	21.2882	22.2717	21.19		0.219842	0.79791	-0.112147	-0.544842
P01593;P01594	IGKV1D-33;IGKV1-33	Immunoglobulin kappa variable 1D-33;Immunoglobulin kappa variable 1-33	17.047	17.9099	17.2	17.8083	17.2646	16.5498	17.0115	15.7189	16.9553	17.251	16.4058	17.0296	16.6771	16.9623	17.149	16.2061		0.590949	0.524908	-0.234217	-1.23555
A0A075B7D4;A0A0C4DH72;A0A0C4DH73;P01597;P01611;P04432	IGKV1OR2-108;IGKV1-6;IGKV1-12;IGKV1-39;IGKV1D-12;IGKV1D-39	Immunoglobulin kappa variable 1/OR2-108 (non-functional) (Fragment);Immunoglobulin kappa variable 1-6;Immunoglobulin kappa variable 1-12;Immunoglobulin kappa variable 1-39;Immunoglobulin kappa variable 1D-12;Immunoglobulin kappa variable 1D-39	10.9205	14.8101	14.7141	9.86404	14.5993	11.4219	10.9414	10.9351	10.4456	13.0155	11.2683	13.0364	11.0872	14.5068	14.8186	9.92737		0.00397484	0.994984	-0.0125784	-0.0118326
A0A075B6P5;P01615	IGKV2-28;IGKV2D-28	Immunoglobulin kappa variable 2-28;Immunoglobulin kappa variable 2D-28	15.5854	17.034	16.3629	16.8025	15.9397	14.8675	15.8146	15.4176	15.9117	16.151	16.3286	15.9131	15.8108	14.9609	16.5948	15.5195		0.151294	0.860238	-0.0792192	-0.393246
P01619	IGKV3-20	Immunoglobulin kappa variable 3-20	17.8176	18.1365	16.2896	17.1702	17.0311	17.0616	17.2381	16.629	17.3276	16.1554	16.8348	16.6152	16.9976	17.0781	17.7191	16.9167		0.318381	0.707799	-0.216158	-0.7452
P06312	IGKV4-1	Immunoglobulin kappa variable 4-1	14.4207	15.63	13.2384	15.0632	13.491	10.0835	16.2873	9.44786	10.9635	9.70322	10.5155	13.2548	16.1671	13.332	15.4333	10.2159		0.406537	0.638106	-1.00957	-0.911866
P0DOY2;P0DOY3	IGLC2;IGLC3	Immunoglobulin lambda constant 2;Immunoglobulin lambda constant 3	20.3956	20.1036	19.9683	20.5793	20.4263	19.0483	19.618	18.787	20.0646	19.479	19.3886	20.3821	20.1985	19.906	20.546	19.8138		0.166016	0.847812	0.10651	0.426844
A0A0B4J231;B9A064	IGLL5	Isoform of B9A064. Immunoglobulin lambda-like polypeptide 5;Immunoglobulin lambda-like polypeptide 5	18.3221	18.4647	17.6057	18.8757	18.4103	16.2277	18.2385	15.9258	18.4016	16.9658	18.0674	17.9409	18.2206	16.9891	18.5898	16.8198		0.0108205	0.984574	-0.0094341	-0.0319644
P01700	IGLV1-47	Immunoglobulin lambda variable 1-47	9.75479	15.5069	12.5657	12.983	13.0174	11.2202	10.371	11.2089	10.7055	9.12468	8.99493	12.461	15.0867	10.4226	16.2286	10.201		0.124017	0.887226	-0.425352	-0.329258
P80748	IGLV3-21	Immunoglobulin lambda variable 3-21	16.702	16.2939	15.7068	17.5791	16.2449	15.4383	15.5767	15.2037	16.1744	15.6967	15.6065	16.3995	16.1746	15.8119	16.4497	15.5405		0.192162	0.822401	-0.111465	-0.485056
P01717	IGLV3-25	Immunoglobulin lambda variable 3-25	13.0524	12.7149	12.4341	13.3233	11.7345	11.9274	9.85295	11.4727	10.5641	9.28041	10.9401	13.1424	11.6301	13.8456	11.9389	9.74023		0.436663	0.615429	-0.678805	-0.966741
Q14116;Q14116-2	IL18	Interleukin-18;Isoform of Q14116. Isoform 2 of Interleukin-18	11.4049	13.8925	11.1489	10.389	13.2473	13.7679	14.4505	9.67632	9.81579	10.3214	9.69779	13.4397	13.7356	13.9581	13.3421	12.5497		0.0618767	0.938539	-0.139636	-0.173449
B4DY09;Q12905	ILF2	Isoform of Q12905. Interleukin enhancer-binding factor 2;Interleukin enhancer-binding factor 2	14.3768	14.8914	15.522	11.9023	15.1441	14.3534	12.5023	13.7588	14.4819	12.9989	14.0084	14.15	13.4981	14.0639	14.7677	14.5754		0.00664269	0.989892	0.0116415	0.0197149
Q12906	ILF3	Interleukin enhancer-binding factor 3	16.1293	15.1257	16.2292	15.2618	16.0898	15.7481	15.3999	15.2447	15.9835	15.7414	15.3587	15.6443	15.7586	15.9204	16.1969	15.6156		0.265863	0.751177	0.123874	0.640609
Q12906-4;Q12906-6	ILF3	Isoform of Q12906. Isoform 4 of Interleukin enhancer-binding factor 3;Isoform of Q12906. Isoform 6 of Interleukin enhancer-binding factor 3	15.2338	14.8575	14.3441	11.1786	9.7571	14.9381	14.7707	15.0418	15.0526	14.1251	14.5945	14.1862	14.4368	15.1061	14.9735	14.6887		0.630906	0.493621	0.880221	1.30257
A0A0A0MTH3;Q13418	ILK	Isoform of Q13418. Integrin-linked protein kinase;Integrin-linked protein kinase	14.998	13.2838	15.2984	14.6935	15.519	13.3977	13.1678	13.1196	13.2932	13.2109	13.1341	15.0482	15.223	14.7338	15.1599	13.5217		0.013113	0.9844	-0.0191261	-0.0386385
A1L0T0;M0R026	ILVBL	Acetolactate synthase-like protein;Isoform of A1L0T0. Acetolactate synthase-like protein	11.9002	11.6235	12.6115	12.9411	12.7249	12.638	12.5214	12.4961	14.0869	13.4174	12.5415	13.0378	13.0535	12.5244	12.1755	13.1109		0.876044	0.354514	0.561397	1.69947
C9J406	IMMT	Isoform of Q16891. MICOS complex subunit MIC60	16.3332	15.946	14.8699	15.4512	14.9357	14.5246	15.7299	16.0309	16.3806	16.3233	15.71	15.538	15.6448	14.3833	15.8276	15.8575		0.894533	0.348112	0.230494	1.72872
H7C463	IMMT	Isoform of Q16891. MICOS complex subunit MIC60 (Fragment)	15.7454	15.3022	14.6572	14.4403	14.4775	14.8548	14.7874	15.2468	15.521	15.2136	15.1803	14.897	14.848	14.4716	15.3181	15.4139		0.646737	0.487673	0.168993	1.3289
Q16891	IMMT	MICOS complex subunit MIC60	18.6358	18.1081	17.0907	17.6696	17.2739	17.7993	17.9985	18.741	18.939	18.1881	18.853	18.1259	17.3833	17.5638	18.1277	18.3734		0.574133	0.533339	0.279656	1.20708
P29218;P29218-3	IMPA1	Inositol monophosphatase 1;Isoform of P29218. Isoform 3 of Inositol monophosphatase 1	17.424	17.8962	17.7671	17.5686	17.6239	17.8249	17.3881	17.4446	17.6981	17.3487	16.9312	17.4529	17.7626	17.8866	17.4891	17.8586		0.165162	0.848225	-0.0637162	-0.424912
O14732;O14732-2	IMPA2	Inositol monophosphatase 2;Isoform of O14732. Isoform 2 of Inositol monophosphatase 2	16.3289	16.2181	16.5496	15.8323	16.5125	16.8405	16.2946	15.5919	16.3499	16.1849	15.8298	16.5663	16.3935	16.2206	16.171	15.6458		0.265048	0.750778	-0.100801	-0.638947
H0Y4R1	IMPDH2	Isoform of P12268. Inosine-5'-monophosphate dehydrogenase 2 (Fragment)	14.524	14.4282	14.3868	14.5905	14.6279	14.4912	14.5218	14.1998	14.4555	14.6407	14.4223	14.4945	14.7922	14.3642	14.9371	14.7901		0.778517	0.404492	0.140809	1.54389
P49441	INPP1	Inositol polyphosphate 1-phosphatase	14.22	10.2422	14.3407	14.4434	14.3987	13.7963	10.3158	14.1264	14.7157	14.8704	13.7877	13.9764	14.4662	13.9689	14.0773	14.3625		0.740002	0.427273	1.0427	1.48172
D6RJC3;E7EQN9;E9PCZ3;E9PHC0;O15327	INPP4B	Isoform of O15327. Type II inositol 3.4-bisphosphate 4-phosphatase (Fragment);Isoform of O15327. Type II inositol 3.4-bisphosphate 4-phosphatase;Isoform of O15327. Type II inositol 3.4-bisphosphate 4-phosphatase (Fragment);Isoform of O15327. Type II inositol 3.4-bisphosphate 4-phosphatase (Fragment);Type II inositol 3.4-bisphosphate 4-phosphatase	12.4489	11.05	10.5268	10.3014	12.3799	13.4645	13.5981	11.7614	12.1914	12.4721	11.1468	11.2656	12.5903	10.0571	13.0918	12.1025		0.0516698	0.949742	-0.0766624	-0.146271
O00410;O00410-3	IPO5	Importin-5;Isoform of O00410. Isoform 3 of Importin-5	16.226	15.8258	16.4337	16.3769	16.2889	15.9078	16.1851	16.0539	16.1515	16.3787	15.9524	16.1741	16.0919	15.6863	15.767	15.8284		0.702554	0.452278	-0.158458	-1.42078
O95373	IPO7	Importin-7	14.5425	14.1993	14.1883	14.2672	14.4623	14.2302	14.0578	13.9896	14.4361	14.3076	14.117	13.9893	14.2174	14.5541	14.0961	14.0343		0.126022	0.885538	-0.0231733	-0.334044
P46940	IQGAP1	Ras GTPase-activating-like protein IQGAP1	13.8888	13.7958	14.6119	13.8023	13.9626	13.9082	13.4209	13.5674	14.1167	13.7181	13.7767	13.7652	13.9461	14.0085	14.1165	13.9179		0.123432	0.887514	0.0509666	0.327859
Q8WZA9	IRGQ	Immunity-related GTPase family Q protein	13.5614	13.6549	14.0251	13.8841	14.1057	13.7063	13.4221	13.3497	14.1714	13.8611	13.6122	13.4364	13.9224	13.6859	13.933	14.0412		0.317074	0.708083	0.119292	0.742652
Q86U28	ISCA2	Iron-sulfur cluster assembly 2 homolog. mitochondrial	15.8119	15.8842	16.3114	15.2954	15.4823	15.5939	14.9378	15.7548	15.6887	15.9078	15.9675	16.0336	15.9771	16.4359	15.7248	16.1876		1.21849	0.226301	0.356402	2.23563
B3KQ30;B4DNC9;F5H5N2;Q9H1K1;Q9H1K1-2	ISCU	Isoform of Q9H1K1. Iron-sulfur cluster assembly enzyme ISCU. mitochondrial;Isoform of Q9H1K1. Iron-sulfur cluster assembly enzyme ISCU. mitochondrial;Isoform of Q9H1K1. Iron-sulfur cluster assembly enzyme ISCU. mitochondrial;Iron-sulfur cluster assembly enzyme ISCU. mitochondrial;Isoform of Q9H1K1. Isoform 2 of Iron-sulfur cluster assembly enzyme ISCU. mitochondrial	15.1171	10.9652	12.8149	10.3834	12.007	12.5491	12.1156	12.6752	12.9218	12.7163	12.765	14.2107	12.8309	14.3464	12.0336	12.5606		0.53492	0.558349	0.719718	1.13997
H0YL90;H0YN67;O14498	ISLR	Isoform of O14498. Immunoglobulin superfamily-containing leucine-rich repeat protein (Fragment);Isoform of O14498. Immunoglobulin superfamily-containing leucine-rich repeat protein (Fragment);Immunoglobulin superfamily containing leucine-rich repeat protein	11.8073	11.3646	16.6148	15.8461	14.6897	15.1599	21.1961	22.7507	9.4865	14.3912	9.67578	14.3397	16.2758	11.5324	16.0756	11.0025		1.06437	0.270939	-3.33123	-1.99523
Q96CN7	ISOC1	Isochorismatase domain-containing protein 1	15.8953	16.3408	16.0814	15.8352	15.8055	16.2572	16.0171	15.4735	15.822	15.7352	15.5531	15.9637	16.1899	15.5116	15.798	15.6195		0.63953	0.492451	-0.189108	-1.31693
Q96AB3;Q96AB3-2	ISOC2	Isochorismatase domain-containing protein 2;Isoform of Q96AB3. Isoform 2 of Isochorismatase domain-containing protein 2	16.2324	16.0677	16.0206	16.3706	15.7323	16.3573	15.61	15.9674	16.5598	16.1426	15.7785	16.3413	15.8392	15.3777	15.9125	16.0561		0.11025	0.899979	-0.0438254	-0.296025
P53990;P53990-2;P53990-4;P53990-5	IST1	IST1 homolog;Isoform of P53990. Isoform 2 of IST1 homolog;Isoform of P53990. Isoform 4 of IST1 homolog;Isoform of P53990. Isoform 5 of IST1 homolog	13.4766	13.3834	13.2743	11.0664	8.18176	13.7267	13.1121	13.6073	13.7398	13.3096	13.3767	12.6934	13.2392	13.293	13.4496	14.1961		0.74511	0.423149	0.933596	1.49
Q9NPH2;Q9NPH2-2;Q9NPH2-3	ISYNA1	Inositol-3-phosphate synthase 1;Isoform of Q9NPH2. Isoform 2 of Inositol-3-phosphate synthase 1;Isoform of Q9NPH2. Isoform 3 of Inositol-3-phosphate synthase 1	16.3041	13.1415	14.5529	12.9106	13.9304	14.0986	13.613	12.6748	14.3617	14.2169	14.0115	13.9344	14.0436	14.5303	12.9973	13.6683		0.0644528	0.934275	0.0672622	0.180229
P56199	ITGA1	Integrin alpha-1	10.4032	15.4465	12.4394	14.9897	12.3423	11.5763	9.25901	11.3753	13.7688	12.2295	11.0663	11.2957	13.8611	10.7314	13.7136	12.1593		0.041797	0.957548	0.124262	0.119489
P23229-2;P23229-4;P23229-6;P23229-9	ITGA6	Isoform of P23229. Isoform Alpha-6X1A of Integrin alpha-6;Isoform of P23229. Isoform Alpha-6X2A of Integrin alpha-6;Isoform of P23229. Isoform Alpha-6X1X2A of Integrin alpha-6;Isoform of P23229. Isoform 9 of Integrin alpha-6	13.0699	13.1833	13.2809	10.1884	9.91114	13.5036	12.646	10.2569	13.8798	10.7641	12.3688	9.71328	11.8421	13.8094	13.352	12.5034		0.202484	0.813004	0.274101	0.507559
J3KNV4;Q13683;Q13683-3;Q13683-7;Q13683-9	ITGA7	Isoform of Q13683. Integrin alpha-7;Integrin alpha-7;Isoform of Q13683. Isoform Alpha-7X1B of Integrin alpha-7;Isoform of Q13683. Isoform Alpha-7X2B of Integrin alpha-7;Isoform of Q13683. Isoform Alpha-7X2DB of Integrin alpha-7	15.8486	16.1799	16.0141	16.2845	16.5748	16.0304	15.4582	14.9981	15.8277	16.0352	15.4074	16.6887	15.9906	15.8056	16.0211	15.6838		0.0173473	0.980437	0.0089457	0.0508787
P06756;P06756-2;P06756-3	ITGAV	Integrin alpha-V;Isoform of P06756. Isoform 2 of Integrin alpha-V;Isoform of P06756. Isoform 3 of Integrin alpha-V	10.8269	10.0088	11.5405	10.2254	12.2647	12.3622	11.0018	11.4057	12.7954	9.98675	11.1113	9.15068	13.2376	13.1177	10.2426	12.9644		0.424982	0.624648	0.371308	0.945573
P05556	ITGB1	Integrin beta-1	15.6645	15.8976	15.4906	15.4457	15.7248	15.7729	15.2302	15.325	15.9196	15.7353	15.3239	15.6718	15.8931	16.3991	15.8641	15.5665		1.15543	0.243251	0.227776	2.13728
Q9UKP3;Q9UKP3-2	ITGB1BP2	Integrin beta-1-binding protein 2;Isoform of Q9UKP3. Isoform 2 of Integrin beta-1-binding protein 2	14.4541	14.9787	15.3714	14.7989	15.3508	14.983	14.7995	14.2082	14.3859	15.3425	13.5722	14.9158	14.9277	13.9158	14.4454	15.4347		0.334482	0.697379	-0.250572	-0.776404
P05107	ITGB2	Integrin beta-2	10.7031	12.4225	11.4609	11.3889	9.73358	11.634	11.397	9.99158	12.0369	12.3224	11.8749	10.1447	11.9585	11.6141	9.87527	9.76408		0.0897973	0.915309	0.107427	0.245368
P05106	ITGB3	Integrin beta-3	10.9117	13.3466	13.5501	14.2596	12.9938	10.1206	12.8532	12.0188	13.2493	9.98937	13.4952	13.5891	13.6706	12.912	13.155	10.4533		0.0280333	0.974481	0.0574294	0.0812856
A0A087WXP3;E9PEE8;P18564;P18564-2	ITGB6	Isoform of P18564. Integrin beta;Isoform of P18564. Integrin beta;Integrin beta-6;Isoform of P18564. Isoform 2 of Integrin beta-6	13.9601	14.2534	14.1115	13.7075	13.81	14.2199	13.8231	14.1118	14.5936	13.9839	14.3434	14.4341	14.3872	15.3376	14.6179	13.8989		1.44155	0.172073	0.44993	2.58556
P19827	ITIH1	Inter-alpha-trypsin inhibitor heavy chain H1	14.2967	14.1312	13.0946	14.4835	13.913	14.1416	13.374	12.4189	13.8951	13.8206	13.7027	14.0495	14.121	14.2039	14.4608	14.5754		0.556738	0.544394	0.371941	1.17744
P19823;Q5T985	ITIH2	Inter-alpha-trypsin inhibitor heavy chain H2;Isoform of P19823. Inter-alpha-trypsin inhibitor heavy chain H2	15.9747	16.2931	15.6897	16.7188	16.0646	15.7414	15.361	14.8626	15.5972	15.5476	15.2275	15.5647	15.9757	15.3352	16.0252	15.9392		0.306867	0.717154	-0.1867	-0.722651
B7ZKJ8;Q14624;Q14624-2;Q14624-3	ITIH4	Isoform of Q14624. ITIH4 protein;Inter-alpha-trypsin inhibitor heavy chain H4;Isoform of Q14624. Isoform 2 of Inter-alpha-trypsin inhibitor heavy chain H4;Isoform of Q14624. Isoform 3 of Inter-alpha-trypsin inhibitor heavy chain H4	14.6039	14.7627	14.2996	15.351	14.7972	14.2038	14.0457	13.7313	13.8775	14.3584	14.4985	14.4339	14.8571	14.2219	14.7866	14.5196		0.048087	0.952097	-0.0302106	-0.13661
Q9BY32	ITPA	Inosine triphosphate pyrophosphatase	15.8874	10.9453	17.3813	17.481	17.284	10.1688	11.924	15.9068	15.3354	15.3068	11.2911	17.6275	15.3474	15.1867	15.4756	12.1593		0.0227703	0.978939	0.0938778	0.0663945
A0A0A0MT83;P26440	IVD	Isoform of P26440. Isovaleryl-CoA dehydrogenase. mitochondrial;Isovaleryl-CoA dehydrogenase. mitochondrial	13.8774	14.609	15.4615	15.1806	14.9235	15.6531	15.2334	15.2673	13.6967	12.8984	15.7316	15.018	15.2091	14.9067	16.0084	15.2123		0.30156	0.722277	-0.190581	-0.712189
C9JA05;D6RD17;D6RHJ6;P01591	JCHAIN	Isoform of P01591. Immunoglobulin J chain (Fragment);Isoform of P01591. Immunoglobulin J chain (Fragment);Isoform of P01591. Immunoglobulin J chain (Fragment);Immunoglobulin J chain	16.114	15.477	13.6695	16.1419	15.218	14.4983	15.2356	13.3739	15.5813	14.8252	14.4431	14.7565	15.5197	15.7107	15.4073	14.4938		0.148724	0.862612	0.126183	0.387317
Q9HDC5	JPH1	Junctophilin-1	17.303	17.2853	17.2907	17.462	17.3772	16.9869	17.1581	17.2167	17.2485	17.0978	16.8908	17.1482	17.3615	17.3822	17.2106	17.4671		0.136134	0.872144	-0.0341332	-0.357974
Q9BR39	JPH2	Junctophilin-2	15.9484	16.1949	16.1578	16.0878	16.2816	16.3637	16.2696	15.9655	16.3601	16.3084	15.6538	16.0007	16.471	16.5192	16.1686	16.282		0.248652	0.769455	0.0618032	0.605284
Q9UK76	JPT1	Jupiter microtubule associated homolog 1	16.1211	16.5636	16.352	16.4092	16.4488	16.5862	16.5505	15.6262	16.2228	16.1019	15.7878	16.3485	16.1593	17.6535	16.1373	15.6996		0.141446	0.867284	-0.068357	-0.370415
A6NGP5;H3BU16;Q9H910;Q9H910-2;Q9H910-3	JPT2	Isoform of Q9H910. Jupiter microtubule-associated homolog 2;Isoform of Q9H910. Jupiter microtubule-associated homolog 2 (Fragment);Jupiter microtubule associated homolog 2;Isoform of Q9H910. Isoform 2 of Jupiter microtubule associated homolog 2;Isoform of Q9H910. Isoform 3 of Jupiter microtubule associated homolog 2	14.1482	14.5025	14.137	14.4095	14.0217	14.9913	14.3525	14.5268	14.3839	14.4421	13.8526	14.1541	14.6101	15.328	13.4614	13.7329		0.324347	0.703326	-0.140544	-0.756807
Q96MG2	JSRP1	Junctional sarcoplasmic reticulum protein 1	18.3663	17.2493	17.89	17.9902	18.5232	19.1916	18.5632	18.6488	18.79	18.2001	18.2448	17.811	18.7296	19.5058	18.3214	18.5274		0.769046	0.408626	0.213436	1.52865
P14923	JUP	Junction plakoglobin	15.4851	13.8585	13.8411	15.2043	13.8165	15.0184	14.3777	14.3142	14.2798	14.1192	13.7544	13.6735	14.4965	9.73316	14.2231	11.3614		0.953964	0.318329	-1.28434	-1.82237
Q63ZY3;Q63ZY3-3	KANK2	KN motif and ankyrin repeat domain-containing protein 2;Isoform of Q63ZY3. Isoform 3 of KN motif and ankyrin repeat domain-containing protein 2	9.13471	11.2398	10.6768	12.4628	11.611	12.3653	10.7025	12.4767	12.6517	12.1827	11.1871	13.1529	12.5523	17.3332	12.0829	11.919		1.34868	0.195812	1.549	2.4393
Q6NY19;Q6NY19-2	KANK3	KN motif and ankyrin repeat domain-containing protein 3;Isoform of Q6NY19. Isoform 2 of KN motif and ankyrin repeat domain-containing protein 3	13.027	13.103	13.3493	12.4114	13.1137	13.24	12.641	12.8942	13.2295	13.1364	12.5471	12.7458	12.977	12.9973	12.8848	12.9521		0.112249	0.898674	-0.0386885	-0.300891
Q15046	KARS	Lysine--tRNA ligase	13.2665	15.3796	14.7211	14.314	14.1492	13.7606	13.9108	13.9171	13.8013	14.274	14.2064	14.5128	14.3748	14.1528	14.4745	14.011		0.0870162	0.915905	0.0485686	0.238353
K7EIJ8;K7EM02;Q8IYT4;Q8IYT4-2	KATNAL2	Isoform of Q8IYT4. Katanin p60 ATPase-containing subunit A-like 2 (Fragment);Isoform of Q8IYT4. Katanin p60 ATPase-containing subunit A-like 2 (Fragment);Katanin p60 ATPase-containing subunit A-like 2;Isoform of Q8IYT4. Isoform 2 of Katanin p60 ATPase-containing subunit A-like 2	16.0432	16.2078	15.7859	10.6846	16.0291	10.2211	10.7026	16.1011	10.744	15.8452	16.4162	16.1417	15.7378	16.6252	11.4816	16.1368		0.301442	0.722124	0.919149	0.711955
Q9P0J7	KCMF1	E3 ubiquitin-protein ligase KCMF1	9.97694	10.3462	10.7936	11.2169	12.3412	11.204	12.3192	9.60508	10.8701	10.8202	11.2979	9.85382	11.0924	10.9484	13.1867	9.95087		0.0295921	0.972499	0.0271523	0.0856652
Q96CX2	KCTD12	BTB/POZ domain-containing protein KCTD12	16.261	15.5136	16.0062	15.8093	15.9898	15.9023	15.3942	15.4869	16.3879	14.8041	15.542	15.9315	15.2644	15.8461	15.7799	15.9144		0.285102	0.734072	-0.111607	-0.679454
Q07666;Q07666-2	KHDRBS1	KH domain-containing. RNA-binding. signal transduction-associated protein 1;Isoform of Q07666. Isoform 2 of KH domain-containing. RNA-binding. signal transduction-associated protein 1	13.9825	13.094	12.8947	14.7066	14.934	13.332	13.4427	13.5164	13.7409	13.8105	13.109	12.2004	14.0308	14.4655	14.2282	13.7049		0.0662479	0.932069	-0.0765911	-0.184936
A0A087WTP3;Q92945	KHSRP	Isoform of Q92945. Far upstream element-binding protein 2;Far upstream element-binding protein 2	14.2032	13.8519	15.1221	14.1838	15.0232	14.6976	13.5824	13.8276	14.4896	14.5843	13.8208	14.7218	14.9669	15.1385	14.4869	14.2223		0.454157	0.60732	0.2424	0.998192
Q96AT1	KIAA1143	Uncharacterized protein KIAA1143	12.2965	12.7448	11.6694	10.8676	11.1415	13.1041	12.4878	11.7124	13.1631	12.5005	11.7714	10.3511	12.7026	13.5909	12.6477	10.9448		0.329725	0.700748	0.205994	0.767224
Q5T5P2;Q5T5P2-3	KIAA1217	Sickle tail protein homolog;Isoform of Q5T5P2. Isoform 3 of Sickle tail protein homolog	11.5162	12.1823	12.7439	12.5135	13.0662	8.43199	12.0405	11.8107	13.6921	12.1052	11.0739	11.2015	12.1295	12.5959	11.878	11.5102		0.127577	0.88289	0.235126	0.337746
A0A1B0GVJ7	KIAA1671	Isoform of Q9BY89. Uncharacterized protein KIAA1671	11.1163	11.3509	11.6726	12.374	13.1404	13.4877	12.2116	11.1734	12.1922	9.78447	10.1194	12.7608	12.3114	14.0313	11.9585	11.9787		0.185704	0.826755	-0.173764	-0.470842
C9JKA9;Q9NS87;Q9NS87-2;Q9NS87-3;Q9NS87-4	KIF15	Isoform of Q9NS87. Kinesin-like protein KIF15;Kinesin-like protein KIF15;Isoform of Q9NS87. Isoform 2 of Kinesin-like protein KIF15;Isoform of Q9NS87. Isoform 3 of Kinesin-like protein KIF15;Isoform of Q9NS87. Isoform 4 of Kinesin-like protein KIF15	16.4911	16.8226	16.558	16.7517	16.9161	17.004	16.5165	16.7887	17.21	16.9765	16.7711	17.4392	17.5818	17.72	17.0432	17.4604	+	3.54079	0.0224	0.544171	6.6599
P33176	KIF5B	Kinesin-1 heavy chain	15.2329	12.6258	14.3	14.6101	14.5042	14.4242	14.3622	14.489	14.8073	13.6119	14.3117	14.5477	14.7428	14.7957	14.5403	14.5518		0.560318	0.542446	0.170099	1.18355
Q9NSK0;Q9NSK0-3;Q9NSK0-5	KLC4	Kinesin light chain 4;Isoform of Q9NSK0. Isoform 3 of Kinesin light chain 4;Isoform of Q9NSK0. Isoform 5 of Kinesin light chain 4	9.44991	11.1254	13.8474	9.7253	10.189	11.3645	12.3062	12.8155	13.0218	13.7017	11.9349	10.4504	14.2983	10.9996	12.6408	12.3312		0.701649	0.451803	1.06945	1.41931
Q9H511	KLHL31	Kelch-like protein 31	12.8338	12.4471	12.8597	12.4852	13.2632	13.5091	12.1051	13.3092	13.3515	13.2399	13.6503	13.0775	13.2011	13.6823	14.0529	13.7733		1.74757	0.114997	0.652054	3.07733
Q2TBA0	KLHL40	Kelch-like protein 40	18.0317	18.5447	18.3458	18.3596	18.5945	18.861	18.6358	18.571	17.9462	18.4656	18.2201	18.0263	18.8937	18.2486	18.4247	18.3906		0.957993	0.317153	-0.166039	-1.8287
O60662	KLHL41	Kelch-like protein 41	20.1059	20.2298	20.4052	20.5516	20.9015	20.8484	20.8586	20.5093	20.5505	20.6784	20.3694	20.5549	21.146	20.3473	20.8061	20.9841		0.493762	0.581555	0.128297	1.06838
P01042;P01042-2	KNG1	Kininogen-1;Isoform of P01042. Isoform LMW of Kininogen-1	15.647	15.5379	14.8493	15.3339	15.1072	14.9336	14.8709	14.5675	15.2247	14.7427	15.1193	15.0308	15.0396	15.3678	15.4214	14.7489		0.0405654	0.957639	-0.0190133	-0.116113
P52294	KPNA1	Importin subunit alpha-5	13.7604	14.0494	13.9532	14.654	13.3863	14.1671	13.8063	13.7338	13.7044	13.3979	13.0126	14.136	13.4437	13.7888	13.2623	13.8728		1.51964	0.156152	-0.361505	-2.70942
O00505	KPNA3	Importin subunit alpha-4	16.7904	16.5693	17.0138	16.7491	17.2517	16.9602	17.1642	16.9326	16.8196	16.9211	16.6818	16.7509	17.1394	16.7399	16.8199	17.0092		0.363095	0.669125	-0.0686841	-0.830971
O00629	KPNA4	Importin subunit alpha-3	15.1022	14.5828	14.4802	14.5532	14.6867	14.2625	14.1862	13.4055	14.2937	14.1276	13.811	13.8275	14.2794	15.3068	14.2444	13.8866		0.343481	0.688095	-0.185289	-0.793684
O60684	KPNA6	Importin subunit alpha-7	14.5225	10.8633	15.5031	14.2278	14.7183	13.968	13.8071	13.0546	14.0377	13.8311	13.5209	14.6173	14.0493	13.0972	13.9505	13.9634		0.0335602	0.965302	0.0503331	0.0967521
Q14974	KPNB1	Importin subunit beta-1	16.788	16.56	16.9337	17.0264	16.9493	16.5509	16.4298	16.3968	16.7811	16.5351	16.3229	16.8003	16.9637	16.8861	16.7582	16.6554		0.0258606	0.976536	0.0084722	0.0751578
P01116;P01116-2	KRAS	GTPase KRas;Isoform of P01116. Isoform 2B of GTPase KRas	15.3539	15.0245	11.0204	14.5762	10.8592	10.037	10.0484	14.1598	14.6891	9.78997	14.4895	11.6597	10.8932	14.7654	14.7776	12.1844		0.0746081	0.925645	0.271181	0.206664
P04264	KRT1	Keratin. type II cytoskeletal 1	13.8657	13.5381	13.9464	15.6255	14.924	14.9756	15.3217	14.2214	14.1632	14.6147	15.0295	14.3028	13.298	14.4996	14.4193	14.5726		0.204684	0.81124	-0.189844	-0.512324
P13645	KRT10	Keratin. type I cytoskeletal 10	13.8537	11.0651	14.7813	12.1624	10.9486	10.1349	15.467	15.2941	13.0657	10.2982	13.3327	9.86082	12.3752	11.7225	13.4294	11.2611		0.794393	0.395558	-1.04519	-1.56938
P02533	KRT14	Keratin. type I cytoskeletal 14	15.537	13.035	13.0883	14.7707	15.0061	17.3603	16.4509	14.2567	17.1007	12.9834	12.9217	15.4697	15.1734	13.3334	13.5822	14.424		0.371267	0.66659	-0.564548	-0.846358
P35908	KRT2	Keratin. type II cytoskeletal 2 epidermal	14.2036	12.0649	14.111	14.8459	14.5963	15.0234	15.656	13.7342	14.8048	14.6438	14.7235	14.5463	14.8278	15.279	14.2244	14.2364		0.436008	0.615914	0.381337	0.965557
P05787;P05787-2	KRT8	Keratin. type II cytoskeletal 8;Isoform of P05787. Isoform 2 of Keratin. type II cytoskeletal 8	17.4448	17.1609	21.5344	17.8767	17.4192	17.3597	17.1526	14.0135	17.482	17.1263	17.0728	17.3844	17.2573	16.4012	17.0351	17.128		0.212132	0.80664	-0.384319	-0.528367
P35527	KRT9	Keratin. type I cytoskeletal 9	13.0764	13.2203	13.0564	13.3524	13.0907	14.3504	13.2629	13.259	13.0943	14.0033	14.4818	12.9901	13.1491	13.703	13.8692	14.1421		0.692381	0.458246	0.345544	1.40414
Q86UP2;Q86UP2-4	KTN1	Kinectin;Isoform of Q86UP2. Isoform 4 of Kinectin	14.1094	13.9787	13.9079	13.2088	13.8596	13.3844	13.2887	13.7835	14.1027	13.7062	13.645	13.8661	14.0946	14.7425	13.9824	14.1341		0.916532	0.335714	0.344105	1.76345
B7Z4W5;Q16773	KYAT1	Isoform of Q16773. Cysteine conjugate-beta lyase cytoplasmic (Glutamine transaminase K. kyneurenine aminotransferase). isoform CRA_b;Kynurenine--oxoglutarate transaminase 1	11.8148	15.4412	14.9795	15.3374	15.3222	14.0729	13.5995	13.5629	13.9711	16.1358	12.4485	14.9967	16.2993	14.952	13.5062	13.2103		0.135626	0.872719	0.173704	0.356781
A0A0A0MRN7;Q6YP21;Q6YP21-3	KYAT3	Isoform of Q6YP21. Kynurenine--oxoglutarate transaminase 3 (Fragment);Kynurenine--oxoglutarate transaminase 3;Isoform of Q6YP21. Isoform 3 of Kynurenine--oxoglutarate transaminase 3	11.6047	10.5118	13.2518	10.8376	13.3616	13.4584	12.9345	13.648	13.731	11.1014	10.5061	14.3204	13.4899	13.6866	13.7829	13.9417		0.44388	0.613106	0.618919	0.979751
Q9H9P8	L2HGDH	L-2-hydroxyglutarate dehydrogenase. mitochondrial	15.7201	14.5539	15.6346	15.5756	15.1615	16.0201	15.4232	15.8188	16.1689	15.5992	15.4727	15.6935	15.7219	15.2988	15.3941	15.9404		0.414538	0.633765	0.172706	0.926532
Q96EM0	L3HYPDH	Trans-3-hydroxy-L-proline dehydratase	12.4202	11.2582	11.9194	11.1543	12.2984	12.8496	13.1878	10.675	13.0795	10.8275	10.3839	11.4982	12.6073	13.6861	12.8412	12.5235		0.242415	0.775574	0.210526	0.592344
P83111	LACTB	Serine beta-lactamase-like protein LACTB. mitochondrial	17.023	16.6801	17.0511	16.9748	16.9687	16.8615	16.6798	17.1586	17.2489	16.8879	16.8648	17.159	17.1222	16.4072	16.7636	17.335		0.231569	0.784454	0.0488605	0.569653
Q53H82	LACTB2	Endoribonuclease LACTB2	13.8409	13.8899	13.0877	12.664	12.9231	12.9799	13.4894	12.6926	12.9184	13.4958	13.6372	13.5705	13.1536	13.3342	12.6131	12.8038		0.00732807	0.989513	-0.00510406	-0.0217322
Q14657	LAGE3	EKC/KEOPS complex subunit LAGE3	12.7775	14.5524	14.4978	12.3191	14.2046	14.0606	12.8924	13.4911	14.1357	14.0062	13.7252	14.3884	14.2864	13.8384	13.4723	13.9431		0.512574	0.568413	0.375011	1.10126
A0A087WX80;A0A087WYF1;P24043	LAMA2	Isoform of P24043. Laminin subunit alpha-2;Isoform of P24043. Laminin subunit alpha-2;Laminin subunit alpha-2	15.6319	15.8295	15.8868	15.7901	16.038	15.8521	16.047	15.6764	15.4117	15.6508	15.1608	15.839	15.6678	15.7519	16.0911	16.0417		0.595892	0.522144	-0.142098	-1.24389
A0A0A0MQS9;A0A0A0MTC7;Q16363;Q16363-2	LAMA4	Isoform of Q16363. Laminin subunit alpha-4;Isoform of Q16363. Laminin subunit alpha-4;Laminin subunit alpha-4;Isoform of Q16363. Isoform 2 of Laminin subunit alpha-4	13.7799	12.6588	13.9469	13.4374	13.4173	13.342	13.5535	13.2237	14.0538	13.7776	13.6532	13.9475	14.5265	13.9994	14.2096	14.116		2.12873	0.0702924	0.61553	3.72218
O15230	LAMA5	Laminin subunit alpha-5	12.6116	18.783	13.0621	12.6102	13.1646	13.0887	13.2691	12.6897	13.2218	12.7434	12.6409	12.9659	13.1493	12.7744	13.1374	12.9493		0.412973	0.63486	-0.712051	-0.923667
G3XAI2;P07942	LAMB1	Isoform of P07942. Laminin subunit beta-1;Laminin subunit beta-1	15.994	16.5214	16.5243	16.417	16.4139	16.4231	16.5373	16.7747	16.126	16.4158	15.7648	16.1223	16.4969	16.5081	16.4958	16.8314		0.456072	0.607168	-0.105567	-1.00162
P55268	LAMB2	Laminin subunit beta-2	16.099	15.5754	16.5588	16.3093	16.8974	15.6343	15.6875	15.2887	15.631	16.2631	15.6449	16.6122	16.6399	15.7412	16.1307	15.1367		0.0604751	0.939622	-0.0313362	-0.169746
P11047	LAMC1	Laminin subunit gamma-1	16.634	16.5487	16.5514	16.4259	16.5348	16.3677	16.4744	16.3964	16.305	16.1209	16.0985	16.114	16.2618	16.4612	16.72	16.3605		1.10314	0.260893	-0.186422	-2.05573
[truncated: 1,734 more rows]
