# Supplementary material for: High-intensity interval training remodels the proteome and acetylome of human skeletal muscle
Source: eLife. 2022 May 31;11:e69802. doi: 10.7554/eLife.69802 (PMC9154743; doi:10.7554/eLife.69802)
Supplement: Supplementary file 3. [file elife-69802-supp3.xlsx]

## Sheet: Supp_File3_Proteome_Fishers
Category column	Category value	Background Matrix Size	Selection size	Category size	Intersection size	Enrichment factor	P value	Benj. Hoch. FDR
GOBP name	respiratory electron transport chain	3168	126	92	16	4.3727	3.0901e-07	0.0010871		Category column	Annotation type
GOBP name	electron transport chain	3168	126	92	16	4.3727	3.0901e-07	0.0010871		Category value	Annotation term
GOBP name	generation of precursor metabolites and energy	3168	126	190	22	2.9113	2.4439e-06	0.0057317		Background Matrix Size	Total proteome size
GOBP name	oxidation-reduction process	3168	126	250	25	2.5143	6.7301e-06	0.011838		Selection size	Number of signifcantly regulated proteins
GOCC name	mitochondrial inner membrane	3168	126	249	34	3.4332	2.6469e-11	8.6112e-09		Category size	Number of proteins from the category in the total proteome
GOCC name	organelle inner membrane	3168	126	262	35	3.3588	2.3684e-11	8.6112e-09		Intersection size	Number of signifcantly regulated proteins in the category
GOCC name	mitochondrial membrane	3168	126	301	37	3.0907	6.7641e-11	1.6504e-08		Enrichment factor	Fisher's exact test enrichment factor
GOCC name	mitochondrial part	3168	126	466	52	2.8056	8.3711e-14	8.1702e-11		P value	Fisher's exact test p-value
GOCC name	mitochondrion	3168	126	576	44	1.9206	2.2442e-06	0.00043807		Benj. Hoch. FDR	Benjamini-Hochberg FDR (<0.02) corrected p-value
KEGG name	Citrate cycle (TCA cycle)	3168	126	26	6	5.8022	0.0003734	0.015932
KEGG name	Cardiac muscle contraction	3168	126	44	8	4.5714	0.00022501	0.01152
KEGG name	Oxidative phosphorylation	3168	126	89	15	4.2376	1.1158e-06	0.00028565
KEGG name	Parkinson's disease	3168	126	94	14	3.7447	1.1218e-05	0.001436
KEGG name	Huntington's disease	3168	126	99	14	3.5556	2.0316e-05	0.0016294
KEGG name	Alzheimer's disease	3168	126	101	14	3.4851	2.5459e-05	0.0016294
Keywords	Mitochondrioninnermembrane	3168	126	148	22	3.7375	3.0254e-08	5.849e-06
Keywords	Transitpeptide	3168	126	319	37	2.9163	3.7596e-10	1.0903e-07
Keywords	Mitochondrion	3168	126	540	56	2.6074	1.3865e-13	8.0417e-11
Reactome	REACT_22393	3168	126	74	14	4.7568	6.1506e-07	0.0005923
