# Supplementary material for: High-intensity interval training remodels the proteome and acetylome of human skeletal muscle
Source: eLife. 2022 May 31;11:e69802. doi: 10.7554/eLife.69802 (PMC9154743; doi:10.7554/eLife.69802)
Supplement: Supplementary file 4. [file elife-69802-supp4.xlsx]

## Sheet: Supp_File4_Acetylome_Identifie 
Proteins	Leading proteins	Protein names	Gene names	Sequence window	Position	Pre_1	Pre_3	Pre_4	Pre_5	Pre_6	Pre_7	Pre_8	Post_1	Post_3	Post_4	Post_5	Post_6	Post_7	Post_8	Amino acid	Charge	Multiplicity	Localization prob	PEP
A0A024QZX5;A0A087X1N8;P35237	A0A024QZX5	Serpin B6	SERPINB6	IIMLPDETTDLRTVEKELTYEKFVEWTRLDM	250	NaN	NaN	NaN	21.8981	21.1998	21.9698	NaN	21.6877	NaN	NaN	20.5094	NaN	21.3734	NaN	K	2	___1	1	0.00124244		Proteins	UniProtKB Accession Numbers
A0A024R6I7;A0A0G2JRN3;P01009;P01009-2;P01009-3	A0A024R6I7;P01009	Alpha-1-antitrypsin;Short peptide from AAT	SERPINA1	VPMMKRLGMFNIQHCKKLSSWVLLMKYLGNA	257	22.2532	NaN	NaN	NaN	NaN	NaN	NaN	21.3122	NaN	NaN	20.486	NaN	NaN	NaN	K	3	___1	1	0.00188911		Leading proteins	UniProtKB Accession Numbers of the Leading Proteins
A0A024R6I7;A0A0G2JRN3;P01009;P01009-2;P01009-3;G3V2B9	A0A024R6I7;P01009	Alpha-1-antitrypsin;Short peptide from AAT	SERPINA1	TGNGLFLSEGLKLVDKFLEDVKKLYHSEAFT	153	23.7358	22.209	24.0667	25.0068	24.3207	24.2797	23.5766	24.4714	NaN	NaN	NaN	25.6506	23.48	23.8348	K	2	___1	1	0.000846746		Protein names	Protein names
A0A024R6I7;A0A0G2JRN3;P01009;P01009-2	A0A024R6I7;P01009	Alpha-1-antitrypsin;Short peptide from AAT	SERPINA1	SNGADLSGVTEEAPLKLSKAVHKAVLTIDEK	352	NaN	22.245	21.9971	23.7539	22.2578	NaN	20.9847	NaN	NaN	NaN	22.8366	NaN	NaN	21.6097	K	2	___1	1	4.87094e-148		Gene names	Gene names
A0A024RA52;P25787	A0A024RA52	Proteasome subunit alpha type;Proteasome subunit alpha type-2	PSMA2	SVGIKAANGVVLATEKKQKSILYDERSVHKV	50	NaN	21.1708	NaN	21.5715	NaN	NaN	20.6185	NaN	NaN	NaN	21.2606	NaN	NaN	21.348	K	2	___1	1	0.000600497		Sequence window	Amino acid sequence window (+/- 15 from ac-K)
A0A087WT47;P19237;G3V4F8;G3V489;G3V3L5	A0A087WT47	Troponin I, slow skeletal muscle	TNNI1	LSLSALQDLCRELHAKVEVVDEERYDIEAKC	72	23.641	NaN	NaN	NaN	NaN	NaN	NaN	21.7478	NaN	NaN	NaN	NaN	NaN	NaN	K	3	___1	1	0.000100868		Position	ac-K amino acid position
A0A087WT47;P19237;G3V4F8;G3V3L5	A0A087WT47	Troponin I, slow skeletal muscle	TNNI1	VQRKPKITASRKLLLKSLMLAKAKECWEQEH	19	24.4799	27.2695	27.4045	27.9574	27.3927	27.6616	25.8543	24.9103	25.9398	27.0341	27.3564	28.0278	27.416	27.3974	K	2	___1	1	4.2792e-05		Values	Log2 Intensity
A0A087WT47;P19237;G3V4F8;G3V3L5	A0A087WT47	Troponin I, slow skeletal muscle	TNNI1	ITASRKLLLKSLMLAKAKECWEQEHEEREAE	25	27.8995	26.9845	27.8006	28.3202	28.2833	29.0849	28.6817	28.5198	26.1077	27.3966	28.2479	27.9282	28.661	28.3862	K	2	___1	1	0.00526939		Amino acid	Acetylated amino acid
A0A087WT48;O60884	A0A087WT48	DnaJ homolog subfamily A member 2	DNAJA2	PLKVSLEDLYNGKTTKLQLSKNVLCSACSGQ	51	NaN	NaN	NaN	21.9492	22.3465	22.3897	22.611	NaN	NaN	21.0759	22.1895	NaN	21.5806	22.1393	K	2	___1	1	0.00831878		Charge	Peptide charge
A0A087WTA8;P08123	A0A087WTA8	Collagen alpha-2(I) chain	COL1A2	PAGPRGPAGPSGPAGKDGRTGHPGTVGPAGI	1062	NaN	NaN	NaN	NaN	NaN	NaN	NaN	20.4982	NaN	NaN	NaN	NaN	NaN	NaN	K	2	___1	1	0.000285748		Multiplicity	Number of acetylated residues on peptide
A0A087WUB1;Q6ZRS4-3;Q6ZRS4;Q6ZRS4-4	A0A087WUB1	Coiled-coil domain-containing protein 129	CCDC129	SVKGRTQKENLFQTNKLKSLSHLAGKGPDSF	381	NaN	NaN	NaN	NaN	NaN	NaN	NaN	20.7482	NaN	NaN	NaN	NaN	NaN	NaN	K	2	___1	1	0.00528329		Localization prob	Localization probability
A0A087WUQ6;P07203	A0A087WUQ6	Glutathione peroxidase;Glutathione peroxidase 1	GPX1	GHQENAKNEEILNSLKYVRPGGGFEPNFMLF	96	19.1089	NaN	23.4944	23.3406	24.2909	24.606	22.1258	23.4439	NaN	26.3765	23.2111	NaN	24.3659	23.2968	K	2	___1	1	8.94064e-74		PEP	Posterior error probability - probability of a false hit
E5RGS7;H0YBP7;B3KPU0;A0A087WVI1;Q96JY6;Q96JY6-3;Q96JY6-5	E5RGS7	PDZ and LIM domain protein 2	PDLIM2	PQSSLPASRALATPPKLHTCEKCSTSIANQA	76	25.7114	NaN	NaN	24.4343	24.7439	22.3034	NaN	25.923	NaN	NaN	25.9715	27.4454	25.6616	25.6635	K	3	___1	1	0.00138045
A0A087WXC5;E7ESZ7;O95299;O95299-2;Q8N1B9;C9J6X0	A0A087WXC5	NADH dehydrogenase [ubiquinone] 1 alpha subcomplex subunit 10, mitochondrial	NDUFA10	NICTGKGKLAKEIAEKLGFKHFPEAGIHYPD	80	28.6499	21.1588	26.5489	26.5329	28.1672	28.1317	27.9738	28.9664	24.4032	29.2854	27.6531	24.8055	28.0771	28.6342	K	2	___1	1	0.00356379
A0A087WXC5;E7ESZ7;O95299	A0A087WXC5	NADH dehydrogenase [ubiquinone] 1 alpha subcomplex subunit 10, mitochondrial	NDUFA10	EVQRRIQKKGDPHEMKITSAYLQDIENAYKK	228	24.6556	NaN	NaN	NaN	NaN	NaN	NaN	24.666	NaN	NaN	NaN	NaN	NaN	NaN	K	3	___1	1	1.90831e-15
A0A087WXC5;E7ESZ7;O95299;O95299-2	A0A087WXC5	NADH dehydrogenase [ubiquinone] 1 alpha subcomplex subunit 10, mitochondrial	NDUFA10	MKITSAYLQDIENAYKKTFLPEMSEKCEVLQ	242	NaN	NaN	NaN	NaN	NaN	21.6577	NaN	21.0754	NaN	23.4211	21.6721	22.4146	22.9686	23.248	K	2	___1	1	1.89765e-24
A0A087WXC5;E7ESZ7;O95299;O95299-2;H7C2W5;H7C1Y7;H7C2X4	A0A087WXC5	NADH dehydrogenase [ubiquinone] 1 alpha subcomplex subunit 10, mitochondrial	NDUFA10	IENAYKKTFLPEMSEKCEVLQYSAREAQDSK	252	NaN	NaN	NaN	NaN	NaN	NaN	NaN	21.071	NaN	22.7326	NaN	NaN	NaN	NaN	K	3	___1	1	1.20008e-06
A0A087WXC5;E7ESZ7;O95299;O95299-2;H7C2W5;H7C1Y7;H7C2X4	A0A087WXC5	NADH dehydrogenase [ubiquinone] 1 alpha subcomplex subunit 10, mitochondrial	NDUFA10	EAQDSKKVVEDIEYLKFDKGPWLKQDNRTLY	277	21.5256	NaN	NaN	NaN	NaN	NaN	NaN	21.3474	NaN	NaN	NaN	NaN	NaN	NaN	K	2	___1	1	0.00317675
A0A087WXS0;P48788-2;P48788	A0A087WXS0	Troponin I, fast skeletal muscle	TNNI2	AATELEKEESRREAEKQNYLAEHCPPLHIPG	41	23.3656	NaN	NaN	NaN	NaN	NaN	NaN	24.1623	NaN	NaN	NaN	NaN	NaN	NaN	K	4	___1	1	2.1432e-28
A0A087WXS0;P48788-2;P48788	A0A087WXS0	Troponin I, fast skeletal muscle	TNNI2	VRVQKTSKELEDMNQKLFDLRGKFKRPPLRR	99	25.002	23.2218	22.8875	24.6865	24.4989	NaN	NaN	24.0445	NaN	21.8066	24.7649	24.4316	21.2782	24.2069	K	2	___1	1	9.50946e-19
A0A087WXS0;P48788-2;P48788	A0A087WXS0	Troponin I, fast skeletal muscle	TNNI2	LCKQLHAKIDAAEEEKYDMEVRVQKTSKELE	79	23.724	24.3141	23.4569	25.1638	23.7808	24.2892	22.6887	23.9665	NaN	NaN	24.0137	23.6468	22.9467	24.2259	K	2	___1	1	2.8834e-16
A0A087WXS0;P48788-2;P48788	A0A087WXS0	Troponin I, fast skeletal muscle	TNNI2	RPPLRRVRMSADAMLKALLGSKHKVCMDLRA	124	NaN	NaN	NaN	27.4381	25.1789	NaN	23.521	23.6531	NaN	NaN	NaN	25.1839	26.0232	NaN	K	2	___1	1	1.22167e-08
A0A087WXS0;P48788-2;P48788	A0A087WXS0	Troponin I, fast skeletal muscle	TNNI2	RDLRDVGDWRKNIEEKSGMEGRKKMFESES_	168	27.0913	24.8047	25.9668	26.5356	24.9845	25.307	25.1972	27.6678	23.672	25.0585	26.2122	25.4764	25.6054	25.9638	K	2	___1	1	0.000204647
A0A087WXS0;P48788-2;P48788	A0A087WXS0	Troponin I, fast skeletal muscle	TNNI2	HLKSVMLQIAATELEKEESRREAEKQNYLAE	32	22.0724	NaN	NaN	NaN	22.983	NaN	NaN	23.8559	NaN	22.9498	23.9008	NaN	22.2476	NaN	K	3	___1	1	1.00073e-72
A0A087WYP2;Q8IZQ5	A0A087WYP2	Selenoprotein H	C11orf31;SELH	GRKRKAEAAVVAVAEKREKLANGGEGMEEAT	20	22.3259	NaN	21.7955	23.1787	21.8753	22.7608	20.2171	22.2194	22.1058	22.2152	22.7716	23.3573	23.2506	22.7476	K	2	___1	1	0.000437607
A0A087WYS1;E7EUC7;Q16851;Q16851-2	A0A087WYS1;Q16851-2	UTP--glucose-1-phosphate uridylyltransferase	UGP2	LVEIAQVPKAHVDEFKSVSKFKIFNTNNLWI	319	NaN	NaN	NaN	NaN	NaN	NaN	NaN	NaN	19.6131	NaN	NaN	NaN	NaN	21.3573	K	2	___1	1	0.000503765
A0A087WYS1;E7EUC7;Q16851;Q16851-2	A0A087WYS1;Q16851-2	UTP--glucose-1-phosphate uridylyltransferase	UGP2	LTMSEKREFPTVPLVKLGSSFTKVQDYLRRF	431	21.2864	NaN	NaN	NaN	23.0301	21.4284	NaN	22.3884	NaN	NaN	NaN	NaN	NaN	NaN	K	2	___1	1	5.63481e-06
A0A087WYS1;E7EUC7;Q16851;Q16851-2	A0A087WYS1;Q16851-2	UTP--glucose-1-phosphate uridylyltransferase	UGP2	TRADVKGGTLTQYEGKLRLVEIAQVPKAHVD	301	NaN	NaN	NaN	NaN	NaN	21.3957	NaN	NaN	NaN	NaN	19.8556	NaN	21.1976	21.9901	K	2	___1	1	0.000742756
A0A087WYS1;E7EUC7;Q16851;C9JQU9;Q16851-2;C9JNZ1;C9JVG3;C9JWG0;C9JTZ5;C9JUW1;F2Z3H1	A0A087WYS1;Q16851-2	UTP--glucose-1-phosphate uridylyltransferase	UGP2	EKILTTASSHEFEHTKKDLDGFRKLFHRFLQ	52	20.9483	NaN	NaN	NaN	NaN	NaN	NaN	22.5634	NaN	NaN	NaN	NaN	NaN	NaN	K	4	___1	1	2.46984e-25
A0A087WYS1;E7EUC7;Q16851;C9JQU9;Q16851-2;C9JNZ1;C9JVG3;C9JWG0;C9JTZ5;C9JUW1	A0A087WYS1;Q16851-2	UTP--glucose-1-phosphate uridylyltransferase	UGP2	GKIQRPPEDSIQPYEKIKARGLPDNISSVLN	91	23.2028	NaN	NaN	NaN	NaN	NaN	NaN	24.002	NaN	NaN	21.3374	NaN	20.5594	21.5296	K	3	___1	1	3.14046e-06
A0A087WYS1;E7EUC7;Q16851;C9JQU9;C9J6Q0;Q16851-2;C9JNZ1;C9JVG3;C9JWG0;C9JTZ5;C9JUW1;F2Z3H1;C9J3M0;F2Z3P4;F8WC70	A0A087WYS1;Q16851-2	UTP--glucose-1-phosphate uridylyltransferase	UGP2	SQFQEVIRQELELSVKKELEKILTTASSHEF	33	24.1879	NaN	NaN	NaN	NaN	NaN	NaN	NaN	NaN	NaN	19.932	NaN	20.9156	20.8459	K	2	___1	1	0.00297624
A0A087WYT3;Q15185-3;Q15185-4;Q15185;B4DDC6;Q15185-2	A0A087WYT3	Prostaglandin E synthase 3	PTGES3	EFCVEDSKDVNVNFEKSKLTFSCLGGSDNFK	37	20.8011	24.2188	24.1437	23.5123	23.0915	23.5846	24.0939	24.5949	23.1803	23.4279	24.5012	24.9062	24.7683	25.7439	K	2	___1	1	0.000304276
Q5VXJ5;A0A087WZC3;Q15431	Q5VXJ5	Synaptonemal complex protein 1	SYCP1	EKNEDQLKILTMELQKKSSELEEMTKLTNNK	414	NaN	NaN	NaN	NaN	NaN	NaN	NaN	22.856	NaN	NaN	NaN	NaN	NaN	NaN	K	4	___1	0.998692	0.00778745
A0A087X2E5;A0A087WZN1;O43837-2;O43837	A0A087X2E5	Isocitrate dehydrogenase [NAD] subunit, mitochondrial;Isocitrate dehydrogenase [NAD] subunit beta, mitochondrial	IDH3B	NMASEEKLEQVLSSMKENKVAIIGKIHTPME	105	NaN	20.1094	22.356	20.0815	NaN	22.0112	NaN	22.4636	NaN	23.2807	20.9857	22.0322	22.082	21.0679	K	2	___1	1	6.91328e-07
A0A087X0Q9;Q9BVL4	A0A087X0Q9	Selenoprotein O	SELO	AWQAEHVRVMHANNPKYVLRNYIAQNAIEAA	593	22.2485	NaN	NaN	NaN	NaN	NaN	NaN	23.106	NaN	23.3979	NaN	NaN	21.257	NaN	K	3	___1	1	6.94273e-05
A0A087X0S5;P12109	A0A087X0S5	Collagen alpha-1(VI) chain	COL6A1	IKKGLEQLLVGGSHLKENKYLIVVTDGHPLE	148	NaN	NaN	NaN	NaN	NaN	NaN	NaN	21.3434	NaN	NaN	NaN	NaN	NaN	NaN	K	3	___1	1	0.00125585
A0A087X0W7;Q86TX2;G3V4F2;A0A087WT95;P49753	A0A087X0W7	Acyl-coenzyme A thioesterase 1;Acyl-coenzyme A thioesterase 2, mitochondrial	ACOT2;ACOT1	APEQPVTLRASLRDEKGALFQAHARYRADTL	42	26.1729	23.0063	24.2955	24.8639	25.5132	25.4037	23.7828	27.3324	25.0946	25.6802	25.3355	25.4159	25.6693	26.4276	K	3	___1	1	1.10253e-22
A0A087X0W7;Q86TX2;G3V4F2;A0A087WT95;P49753;P49753-2	A0A087X0W7	Acyl-coenzyme A thioesterase 1;Acyl-coenzyme A thioesterase 2, mitochondrial	ACOT2;ACOT1	DDHNWKSEFYANEACKRLQAHGRRKPQIICY	340	NaN	NaN	NaN	NaN	21.1546	NaN	NaN	NaN	NaN	NaN	20.6528	21.361	19.4346	NaN	K	2	___1	1	0.000182599
A0A087X1N7;P20929-3;P20929-2;P20929-4;P20929	A0A087X1N7	Nebulin	NEB	PQLRQLKAAGDALSDKLYKENYEKTKAKSIN	385	29.6191	NaN	20.1988	21.6109	21.6293	21.8575	20.3901	28.0597	20.7626	NaN	21.394	NaN	21.191	NaN	K	2	___1	1	4.16385e-05
A0A087X1N7;P20929-3;P20929-2;P20929-4;P20929	A0A087X1N7	Nebulin	NEB	PDIVLAKANLINTSDKLYRMGYEELKRKGYD	2513	NaN	NaN	NaN	NaN	19.3329	NaN	NaN	NaN	NaN	NaN	NaN	NaN	NaN	NaN	K	2	___1	1	0.00333229
A0A087X1N7;P20929-3;P20929-2;P20929-4;P20929	A0A087X1N7	Nebulin	NEB	LEMEKAKRASDILNEKKYRQHPDTLKFTSIE	982	NaN	NaN	21.1877	22.0747	21.3555	22.4113	NaN	23.1491	21.7485	NaN	22.241	21.1792	22.338	21.5084	K	2	___1	1	0.00207519
A0A087X1N7;P20929-3;P20929-2;P20929-4;P20929	A0A087X1N7	Nebulin	NEB	LEAEKNKRASEIISEKKYRQPPDRNKFTSIP	2445	NaN	NaN	21.8428	21.0661	NaN	21.8056	21.588	NaN	NaN	NaN	19.3674	NaN	20.9233	21.3471	K	2	___1	1	0.00835903
A0A087X1N7;P20929-3;P20929-2;P20929-4;P20929	A0A087X1N7	Nebulin	NEB	YEAIKKLDQCKDHTYKVHPDKTKFTQVTDSP	494	22.8565	NaN	NaN	NaN	NaN	NaN	NaN	22.2906	NaN	NaN	NaN	NaN	NaN	NaN	K	3	___1	1	2.06664e-05
A0A087X1N7;P20929-3;P20929-2;P20929-4;P20929	A0A087X1N7	Nebulin	NEB	AIKAARASRDIASDYKYKKAYEQAKGKHIGF	1819	NaN	20.8187	20.6225	20.9158	NaN	20.0063	20.0044	NaN	21.3434	NaN	21.391	21.706	NaN	21.5994	K	2	___1	1	0.00429846
A0A087X1N7;P20929-3;P20929-2;P20929-4;P20929	A0A087X1N7	Nebulin	NEB	TKFSSPVDMLGVVLAKKCQELVSDVDYKNYL	2370	NaN	NaN	23.6356	24.9663	NaN	23.1612	24.684	20.6336	NaN	NaN	22.9713	NaN	24.2459	22.9702	K	3	___1	1	2.68695e-06
A0A087X1N7;P20929-3;P20929-2;H0Y786	A0A087X1N7	Nebulin	NEB	GIHNTPLDMMSIVQAKKCQVLVSDIDYRNYL	4314	NaN	NaN	NaN	21.8131	NaN	22.1954	NaN	NaN	NaN	NaN	NaN	NaN	NaN	22.7677	K	3	___1	1	4.48231e-10
A0A087X1N7;P20929-3;P20929-2;P20929-4;P20929	A0A087X1N7	Nebulin	NEB	AQFTPLADPPDIEFAKKVTNQVSKQKYKEDY	266	NaN	NaN	NaN	NaN	NaN	NaN	NaN	21.2298	NaN	NaN	NaN	NaN	NaN	NaN	K	3	___1	1	2.20289e-13
A0A087X1N7;P20929-3;P20929-2;P20929-4;P20929	A0A087X1N7	Nebulin	NEB	SKKKGYDLRPDAIPIKAAKASRDIASDYKYK	2050	20.672	NaN	NaN	NaN	NaN	NaN	NaN	20.8006	NaN	NaN	NaN	NaN	NaN	NaN	K	3	___1	1	0.000720172
A0A087X1N7;P20929-3;P20929-2;H0Y786	A0A087X1N7	Nebulin	NEB	NLLNERLYRIKPEALKFTSIVDTPEVIQAKI	4399	23.4307	NaN	NaN	NaN	NaN	NaN	NaN	23.028	NaN	NaN	NaN	NaN	NaN	NaN	K	3	___1	0.830043	3.07223e-26
A0A087X1N7;P20929-3;P20929-2;H0Y786	A0A087X1N7	Nebulin	NEB	PLMLQSKINALQISNKRYQQAWEDVKMTGYD	4457	NaN	NaN	NaN	NaN	NaN	21.302	NaN	NaN	NaN	NaN	NaN	NaN	21.2768	20.1535	K	2	___1	1	0.00152096
A0A087X1N7;P20929-3;P20929-2;P20929-4;P20929	A0A087X1N7	Nebulin	NEB	PKFKLDTVLQNFSSDKKYKDSYLKDILGHYV	420	20.3455	21.7375	20.7432	21.3797	21.6433	21.5778	21.5483	21.168	NaN	NaN	NaN	NaN	NaN	NaN	K	2	___1	1	6.78837e-07
A0A087X1N7;P20929-3;P20929-2;P20929-4;P20929;H0Y786;H7BZD5;H7C2B3	A0A087X1N7	Nebulin	NEB	DFMRARNATDIASQIKYKQSAEMEKANFTSV	7784	NaN	NaN	NaN	NaN	NaN	NaN	NaN	NaN	NaN	NaN	20.5461	NaN	21.0689	21.3492	K	2	___1	1	2.4164e-05
A0A087X1N7;P20929-3;P20929-2;P20929-4;P20929	A0A087X1N7	Nebulin	NEB	YEKTKAKSINYCETPKFKLDTVLQNFSSDKK	406	NaN	NaN	NaN	21.5729	NaN	21.618	NaN	NaN	21.4891	NaN	22.4274	NaN	21.8725	22.4304	K	2	___1	1	1.34399e-06
A0A087X1N7;P20929-3;P20929-2;P20929-4;P20929;H0Y786	A0A087X1N7	Nebulin	NEB	EVVLAKSNAENISIPKYREVWDKDKTSIHIM	5638	NaN	NaN	20.2644	21.1624	NaN	22.4549	21.5227	NaN	NaN	NaN	NaN	NaN	21.1885	21.4468	K	2	___1	1	5.57552e-12
A0A087X1N7;P20929-3;P20929-2;P20929-4;P20929	A0A087X1N7	Nebulin	NEB	PDILLAKSNSANISQKLYTKGWDESKMKDYD	3971	NaN	NaN	NaN	NaN	NaN	21.3379	NaN	NaN	NaN	NaN	20.2295	NaN	NaN	NaN	K	2	___1	1	0.000148041
A0A087X1N7;P20929-3;P20929-2;P20929-4;P20929	A0A087X1N7	Nebulin	NEB	RMDGDVAKTICHVDEKAKDIEHAKKVSQQVS	153	20.9562	NaN	NaN	NaN	NaN	NaN	NaN	21.3536	NaN	NaN	NaN	NaN	NaN	NaN	K	2	___1	1	0.00480482
A0A087X1N7;P20929-3;P20929-2;P20929-4;P20929	A0A087X1N7	Nebulin	NEB	QSEREYKKDFEKWKTKFSSPVDMLGVVLAKK	2356	22.8732	23.953	25.5203	25.2132	NaN	25.3129	24.2172	23.1687	NaN	25.0962	24.1151	22.7269	24.8571	24.6185	K	2	___1	1	7.10468e-13
A0A087X1N7;P20929-3;P20929-2;P20929-4;P20929	A0A087X1N7	Nebulin	NEB	DQCKDHTYKVHPDKTKFTAVTDSPVLLQAQL	748	20.6433	NaN	NaN	NaN	NaN	NaN	NaN	21.1189	NaN	NaN	NaN	NaN	NaN	NaN	K	3	___1	1	3.67612e-21
A0A087X1N7;P20929-3;P20929-2;P20929-4;P20929	A0A087X1N7	Nebulin	NEB	DQCKDHTYKVHPDKTKFTQVTDSPVLLQAQV	501	20.8131	NaN	NaN	NaN	NaN	NaN	23.7287	21.3379	NaN	NaN	23.8685	NaN	24.4167	23.6855	K	3	___1	1	6.57455e-108
A0A087X1N7;P20929-3;P20929-2;P20929-4;P20929	A0A087X1N7	Nebulin	NEB	ELRRIKKVQDQLSEVKYRMDGDVAKTICHVD	136	NaN	NaN	NaN	20.7321	NaN	NaN	NaN	NaN	NaN	NaN	NaN	NaN	NaN	NaN	K	2	___1	1	0.000558489
A0A0B4J2D5;A0A096LPI6;P30042;A0A096LNH5;H7C2G3;H7C1F6;A0A0B4J2H4;P30042-2	A0A0B4J2D5	ES1 protein homolog, mitochondrial	C21orf33	AKHCVKEVVEAHVDQKNKVVTTPAFMCETAL	233	24.7083	NaN	22.2845	23.4506	23.8725	24.8216	23.5115	25.1171	24.4306	23.2516	22.2003	25.5729	23.6782	24.0288	K	2	___1	1	3.7433e-208
A0A0B4J2D5;A0A096LPI6;P30042;A0A096LNH5;H7C2G3;A0A096LP73;F2Z2Q0;A0A096LP12	A0A0B4J2D5	ES1 protein homolog, mitochondrial	C21orf33	GFGAAKNLSTFAVDGKDCKVNKEVERVLKEF	151	NaN	NaN	NaN	NaN	NaN	NaN	NaN	23.4179	20.8597	22.2021	21.1304	NaN	22.1282	22.0624	K	2	___1	1	2.81363e-12
A0A0U1RQX0;A0A096LPK7;A0A182DWF2;D3YTF8;A0A182DWF3;Q9NNW7-4;Q9NNW7-3;Q9NNW7-2;Q9NNW7	A0A0U1RQX0	Thioredoxin reductase 2, mitochondrial	TXNRD2	WAIGRVPDTRSLNLEKAGVDTSPDTQKILVD	72	NaN	NaN	NaN	NaN	22.3389	21.8803	22.0519	NaN	NaN	20.7925	20.2227	NaN	21.2921	22.3832	K	2	___1	1	5.29644e-42
A0A0A0MR02;P45880-2;P45880;P45880-1;Q5JSD2;Q5JSD1;A2A3S1	A0A0A0MR02	Voltage-dependent anion-selective channel protein 2	VDAC2	SSNTDTGKVTGTLETKYKWCEYGLTFTEKWN	72	NaN	NaN	NaN	NaN	NaN	NaN	NaN	21.5812	22.2419	19.9192	20.8628	NaN	21.4374	21.9662	K	2	___1	1	0.0016735
A0A0A0MRN9;Q9GZV1;Q5T457;Q9GZV1-2	A0A0A0MRN9	Ankyrin repeat domain-containing protein 2	ANKRD2	TALHDAVRLNRYKIIKLLLLHGADMMTKNLA	270	NaN	NaN	NaN	NaN	NaN	NaN	NaN	NaN	NaN	23.3596	22.7961	22.2746	NaN	NaN	K	3	___1	1	0.000189228
Q5VW31;A0A1B0GWB8;A0A1B0GW37;U3KQE8;A0A1B0GVN4;A0A1B0GWJ4;A0A0A0MRX8;A0A1B0GU97;A0A1B0GWI9;Q5VW27;Q5VW30;Q5VW26;O00712-6;O00712;O00712-4;O00712-5	Q5VW31	Nuclear factor 1;Nuclear factor 1 B-type	NFIB	WHERDQDMSSPTTMKKPEKPLFSSASPQDSS	66	NaN	NaN	NaN	NaN	NaN	NaN	NaN	22.7392	NaN	NaN	NaN	NaN	NaN	NaN	K	3	___1	0.816711	8.90326e-07
A0A0A0MS07;A0A0A0MS08;P01857;A0A286YES1;P01860	A0A0A0MS07;A0A286YES1	Ig gamma-1 chain C region;Ig gamma-3 chain C region	IGHG1;IGHG3	YKCKVSNKALPAPIEKTISKAKGQPREPQVY;YKCKVSNKALPAPIEKTISKTKGQPREPQVY	182	26.0639	25.793	22.6573	27.4877	26.528	22.0243	NaN	25.668	25.9223	25.4919	26.821	26.5901	26.8715	26.8751	K	2	___1	1	0.00157286
A0A0A0MSE2;A0A0D9SFP2;E9PF18;Q16836;Q16836-3;Q16836-2;A0A1W2PNM1;A0A1W2PQV5;A0A1W2PQC2;A0A1W2PRT2	A0A0A0MSE2	Hydroxyacyl-coenzyme A dehydrogenase, mitochondrial	HADH	DRFAGLHFFNPVPVMKLVEVIKTPMTSQKTF	179	NaN	25.0466	NaN	NaN	NaN	NaN	NaN	21.836	NaN	NaN	NaN	NaN	NaN	NaN	K	3	___1	1	5.57858e-06
A0A0A0MSE2;A0A0D9SFP2;E9PF18;Q16836;Q16836-3;Q16836-2;A0A1W2PNM1;A0A1W2PQV5;A0A1W2PQC2;A0A1W2PRT2	A0A0A0MSE2	Hydroxyacyl-coenzyme A dehydrogenase, mitochondrial	HADH	HFFNPVPVMKLVEVIKTPMTSQKTFESLVDF	185	29.2572	28.9266	29.0331	28.8717	30.2422	29.7116	28.8641	29.917	26.3264	30.4502	29.4031	28.7186	30.2617	30.0955	K	3	___1	1	4.04161e-27
A0A0A0MSE2;A0A0D9SFP2;E9PF18;Q16836;Q16836-3;Q16836-2;A0A1W2PNM1;A0A1W2PQV5;A0A1W2PQC2;A0A1W2PRT2	A0A0A0MSE2	Hydroxyacyl-coenzyme A dehydrogenase, mitochondrial	HADH	VENLKVKNELFKRLDKFAAEHTIFASNTSSL	136	NaN	NaN	NaN	NaN	NaN	NaN	NaN	20.9662	NaN	NaN	25.1562	23.469	22.9652	NaN	K	3	___1	1	1.46197e-169
A0A0A0MSE2;A0A0D9SFP2;E9PF18;Q16836;Q16836-3;Q16836-2;A0A1W2PNM1;A0A1W2PQ78	A0A0A0MSE2	Hydroxyacyl-coenzyme A dehydrogenase, mitochondrial	HADH	LHQPSPSLNKLVAENKFGKKTGEGFYKYK__	304	23.5215	NaN	24.2062	25.6268	25.8287	25.6207	24.9565	26.1828	24.2362	24.1279	25.5046	23.4686	25.4204	25.7598	K	2	___1	1	0.0016989
A0A0A0MSE2;A0A0D9SFP2;E9PF18;Q16836;Q16836-3;Q16836-2;A0A1W2PNM1;A0A1W2PQV5;A0A1W2PQC2;A0A1W2PRT2;A0A1W2PQ78	A0A0A0MSE2	Hydroxyacyl-coenzyme A dehydrogenase, mitochondrial	HADH	VMKLVEVIKTPMTSQKTFESLVDFSKALGKH	192	22.4262	NaN	25.3198	25.4297	26.9214	26.704	25.3074	24.1401	24.5113	27.1174	25.9313	22.9931	26.8376	26.7824	K	3	___1	1	0
A0A0A0MSE2;A0A0D9SFP2;E9PF18;Q16836;Q16836-3;Q16836-2;A0A1W2PNM1;A0A1W2PQV5;A0A1W2PQC2;A0A1W2PRT2;A0A1W2PQ78	A0A0A0MSE2	Hydroxyacyl-coenzyme A dehydrogenase, mitochondrial	HADH	PMTSQKTFESLVDFSKALGKHPVSCKDTPGF	202	24.4205	25.1506	24.96	24.7432	26.3383	25.234	24.3136	25.6243	25.3515	26.8975	26.5158	26.4712	26.4308	25.9631	K	3	___1	1	1.30891e-57
A0A0A0MSE2;A0A0D9SFP2;E9PF18;Q16836;Q16836-3;Q16836-2;A0A1W2PNM1;A0A1W2PQ78	A0A0A0MSE2	Hydroxyacyl-coenzyme A dehydrogenase, mitochondrial	HADH	VAENKFGKKTGEGFYKYK_____________	315	24.0245	NaN	22.7086	22.4986	23.9968	23.9964	22.6194	24.5609	22.4371	23.2984	24.0303	21.0238	23.2121	23.9323	K	2	___1	1	0.00234281
A0A0A0MSQ0;P13797-3;P13797-2;P13797	A0A0A0MSQ0	Plastin-3	PLS3	RTLSEAGKSTSIQSFKDKTISSSLAVVDLID	532	24.9422	NaN	NaN	22.4841	NaN	21.8634	22.3137	21.3669	20.33	NaN	NaN	NaN	22.2927	22.0945	K	2	___1	1	0.00103292
A0A0A0MT83;P26440;H0YN10;A0A087WVD3	A0A0A0MT83	Isovaleryl-CoA dehydrogenase, mitochondrial	IVD	NGLSEEQRQLRQTMAKFLQEHLAPKAQEIDR	58	NaN	NaN	NaN	21.703	22.2874	NaN	NaN	NaN	NaN	24.3309	22.6031	21.8894	22.7832	NaN	K	3	___1	1	5.99672e-05
A0A0A0MT83;P26440;H0YN10;A0A087WVD3	A0A0A0MT83	Isovaleryl-CoA dehydrogenase, mitochondrial	IVD	HLAPKAQEIDRSNEFKNLREFWKQLGNLGVL	78	22.2147	23.7934	22.2553	24.2785	24.6492	25.3413	24.0921	23.0294	24.0293	25.9092	24.7782	19.1978	26.2787	24.7817	K	2	___1	1	0.00424208
A0A0A0MTS7;Q8WZ42-12;Q8WZ42-13;Q8WZ42-11;Q8WZ42-4;Q8WZ42-7;Q8WZ42-2;Q8WZ42;Q8WZ42-8;Q8WZ42-5;A0A0A0MRA3;Q8WZ42-3;Q8WZ42-10;Q8WZ42-9	A0A0A0MTS7	Titin	TTN	FYKAADPIDPPGPPAKIRIADSTKSSITLGW	29740	NaN	NaN	NaN	NaN	NaN	NaN	NaN	NaN	20.5196	NaN	NaN	NaN	NaN	NaN	K	2	___1	1	0.00177258
A0A0A0MTS7;Q8WZ42-12;Q8WZ42-13;Q8WZ42-11;Q8WZ42-4;Q8WZ42-7;Q8WZ42-2;Q8WZ42;Q8WZ42-8;Q8WZ42-5;A0A0A0MRA3;Q8WZ42-3;Q8WZ42-10;Q8WZ42-9	A0A0A0MTS7	Titin	TTN	TRSPRVKIDTRADSSKFSLTKAKRSDGGKYV	20828	23.6421	NaN	NaN	NaN	NaN	NaN	NaN	22.8666	23.5775	20.6648	22.522	NaN	22.9623	23.4793	K	2	___1	1	0.00212103
A0A0A0MTS7;Q8WZ42-12;Q8WZ42-13;Q8WZ42-11;Q8WZ42-4;Q8WZ42-7;Q8WZ42-2;Q8WZ42;Q8WZ42-8;Q8WZ42-5;A0A0A0MRA3;Q8WZ42-3;Q8WZ42-10;Q8WZ42-9	A0A0A0MTS7	Titin	TTN	VERREKKSLRWVRAIKTPVSDLRCKVTGLQE	23191	22.3209	NaN	22.0931	22.1074	21.0879	24.039	23.008	22.088	23.1111	NaN	NaN	NaN	22.7764	22.6182	K	2	___1	1	0.0062006
A0A0A0MTS7;Q8WZ42-12;Q8WZ42-13;Q8WZ42-11;Q8WZ42-4;Q8WZ42-7;Q8WZ42-2;Q8WZ42;Q8WZ42-8;Q8WZ42-5	A0A0A0MTS7	Titin	TTN	SNEAGKASCTTHLYIKAPAKFVKRLNDYSIE	9109	NaN	NaN	NaN	NaN	NaN	NaN	NaN	NaN	NaN	20.6798	20.6358	NaN	NaN	NaN	K	3	___1	1	0.0024403
A0A0A0MTS7;Q8WZ42-12;Q8WZ42-13;Q8WZ42-11;Q8WZ42-4;Q8WZ42-7;Q8WZ42-2;Q8WZ42;Q8WZ42-8;Q8WZ42-5;A0A0A0MRA3;Q8WZ42-3;Q8WZ42-10;Q8WZ42-9	A0A0A0MTS7	Titin	TTN	DAVKASQTPGPVVDLKVRSVSKSSCSIGWKK	22459	NaN	20.7395	22.246	22.2757	NaN	23.5541	NaN	NaN	23.7344	NaN	21.7797	21.2468	22.4028	23.0316	K	2	___1	1	0.000487385
A0A0A0MTS7;Q8WZ42-12;Q8WZ42-13;Q8WZ42-11;Q8WZ42-4;Q8WZ42-7;Q8WZ42-2;Q8WZ42;Q8WZ42-8;Q8WZ42-5;A0A0A0MRA3;Q8WZ42-3;Q8WZ42-10;Q8WZ42-9;Q8WZ42-6	A0A0A0MTS7	Titin	TTN	AYSRDSGIITCRATNKYGTDHTSATLIVKDE	1782	24.4344	NaN	NaN	22.102	NaN	NaN	NaN	22.0997	23.6545	21.4498	23.5176	22.9307	23.5635	23.7716	K	3	___1	1	1.4138e-09
A0A0A0MTS7;Q8WZ42-12;Q8WZ42-13;Q8WZ42-11;Q8WZ42-4;Q8WZ42-7;Q8WZ42-2;Q8WZ42;Q8WZ42-8;Q8WZ42-5;A0A0A0MRA3;Q8WZ42-3;Q8WZ42-10;Q8WZ42-9	A0A0A0MTS7	Titin	TTN	KLHDKTAVEKDEITLKCEVSKDVPVKWFKDG	14251	23.8519	NaN	NaN	21.3719	NaN	22.3597	NaN	21.527	22.8006	21.8506	NaN	21.5827	22.8938	23.0529	K	2	___1	1	0.000245862
A0A0A0MTS7;Q8WZ42-12;Q8WZ42-13;Q8WZ42-11;Q8WZ42-4;Q8WZ42-7;Q8WZ42-2;Q8WZ42;Q8WZ42-8;Q8WZ42-5	A0A0A0MTS7	Titin	TTN	TWSKDGQKLPPGKDYKICFEDKIATLEIPLA	4935	NaN	NaN	NaN	NaN	NaN	NaN	NaN	NaN	21.2129	NaN	NaN	NaN	NaN	NaN	K	2	___1	1	0.0075349
A0A0A0MTS7;Q8WZ42-12;Q8WZ42-13;Q8WZ42-11;Q8WZ42-4;Q8WZ42-7;Q8WZ42-2;Q8WZ42;Q8WZ42-8;Q8WZ42-5;A0A0A0MRA3;Q8WZ42-3;Q8WZ42-10;Q8WZ42-9;H7C1P9	A0A0A0MTS7	Titin	TTN	LLPERKPEPKEEVVLKSVLRKRPEEEEPKVE	13518	NaN	NaN	NaN	NaN	NaN	22.0794	21.7516	20.4688	NaN	NaN	NaN	21.2191	21.3631	20.8364	K	2	___1	1	0.00593773
A0A0A0MTS7;Q8WZ42-12;Q8WZ42-13;Q8WZ42-11;Q8WZ42-4;Q8WZ42-7;Q8WZ42-2;Q8WZ42;Q8WZ42-8;Q8WZ42-5;A0A0A0MRA3;Q8WZ42-3;Q8WZ42-10;Q8WZ42-9	A0A0A0MTS7	Titin	TTN	IDVNVIARPSAPKELKFGDITKDSVHLTWEP	16063	27.7586	NaN	NaN	NaN	NaN	NaN	NaN	22.1228	NaN	NaN	NaN	NaN	NaN	NaN	K	2	___1	1	0.0075349
A0A0A0MTS7;Q8WZ42-12;Q8WZ42-13;Q8WZ42-11;Q8WZ42-4;Q8WZ42-7;Q8WZ42-2;Q8WZ42;Q8WZ42-8;Q8WZ42-5;A0A0A0MRA3;Q8WZ42-3;Q8WZ42-10;Q8WZ42-9;Q8WZ42-6;A0A0U1RRH3	A0A0A0MTS7	Titin	TTN	DVRIRSIKKEVQVIEKQRAVVEFEVNEDDVD	3161	NaN	NaN	NaN	20.305	NaN	21.8127	20.6226	NaN	20.7593	NaN	NaN	NaN	20.3534	19.53	K	2	___1	1	0.00220757
A0A0A0MTS7;Q8WZ42-12;Q8WZ42-13;Q8WZ42-11;Q8WZ42-4;Q8WZ42-7;Q8WZ42-2;Q8WZ42;Q8WZ42-8;Q8WZ42-5;A0A0A0MRA3;Q8WZ42-3;Q8WZ42-10;Q8WZ42-9	A0A0A0MTS7	Titin	TTN	PVKMVDRFGPPGPPEKPEVSNVTKNTATVSW	23145	NaN	NaN	NaN	NaN	NaN	21.1134	20.3631	NaN	NaN	NaN	NaN	NaN	NaN	NaN	K	2	___1	1	8.65328e-06
A0A0A0MTS7;Q8WZ42-12;Q8WZ42-13;Q8WZ42-11;Q8WZ42-4;Q8WZ42-7;Q8WZ42-2;Q8WZ42;Q8WZ42-8;Q8WZ42-5;A0A0A0MRA3;Q8WZ42-3;Q8WZ42-10;Q8WZ42-9	A0A0A0MTS7	Titin	TTN	VISPSERSDKGIYTLKLENRVKTISGEIDVN	16036	25.0429	NaN	23.9317	23.8592	23.4408	25.7872	25.0087	25.1135	23.7512	24.8931	NaN	NaN	NaN	21.3286	K	2	___1	1	4.40731e-05
A0A0A0MTS7;Q8WZ42-12;Q8WZ42-13;Q8WZ42-11;Q8WZ42-4;Q8WZ42-7;Q8WZ42-2;Q8WZ42;Q8WZ42-8;Q8WZ42-5;A0A0A0MRA3;Q8WZ42-3;Q8WZ42-10;Q8WZ42-9	A0A0A0MTS7	Titin	TTN	KEEWEKGKDKEVRGTKLVVTGLKEGAFYKFR	19047	NaN	NaN	20.7463	21.7808	NaN	22.5396	23.3951	NaN	NaN	NaN	NaN	NaN	22.2488	22.5554	K	2	___1	1	0.00617224
A0A0A0MTS7;Q8WZ42-12;Q8WZ42-13;Q8WZ42-11;Q8WZ42-4;Q8WZ42-7;Q8WZ42-2;Q8WZ42;Q8WZ42-8;Q8WZ42-5;A0A0A0MRA3;Q8WZ42-3;Q8WZ42-10;Q8WZ42-9	A0A0A0MTS7	Titin	TTN	GQVLSTSARHQVTTTKYKSTFEISSVQASDE	35181	NaN	NaN	NaN	NaN	NaN	NaN	NaN	21.6815	NaN	NaN	NaN	NaN	NaN	NaN	K	2	___1	1	0.000356464
A0A0A0MTS7;Q8WZ42-12;Q8WZ42-13;Q8WZ42-11;Q8WZ42-4;Q8WZ42-7;Q8WZ42-2;Q8WZ42;Q8WZ42-8;Q8WZ42-5	A0A0A0MTS7	Titin	TTN	ICFEDKIATLEIPLAKLKDSGTYVCTASNEA	4951	19.6327	NaN	NaN	NaN	NaN	NaN	NaN	21.8202	NaN	NaN	NaN	NaN	NaN	NaN	K	2	___1	1	0.000561335
A0A0A0MTS7;Q8WZ42-12;Q8WZ42-13;Q8WZ42-11;Q8WZ42-4;Q8WZ42-7;Q8WZ42-2;Q8WZ42;Q8WZ42-8;Q8WZ42-5;A0A0A0MRA3;Q8WZ42-3;Q8WZ42-10;Q8WZ42-9	A0A0A0MTS7	Titin	TTN	PLDDGGAKIDHYIVQKRETSRLAWTNVASEV	24162	22.4663	NaN	NaN	NaN	NaN	NaN	NaN	NaN	NaN	NaN	NaN	NaN	NaN	NaN	K	3	___1	1	0.0015594
A0A0A0MTS7;Q8WZ42-12;Q8WZ42-13;Q8WZ42-11;Q8WZ42-4;Q8WZ42-7;Q8WZ42-2;Q8WZ42;Q8WZ42-8;Q8WZ42-5	A0A0A0MTS7	Titin	TTN	TSAELRIEAEPIQFTKRIQNIVVSEHQSATF	10082	22.6916	NaN	21.398	22.8193	22.8368	23.5048	22.3864	21.307	23.3962	NaN	21.2971	NaN	22.5292	23.4801	K	2	___1	1	2.11029e-06
A0A0A0MTS7;Q8WZ42-12;Q8WZ42-13;Q8WZ42-11;Q8WZ42-4;Q8WZ42-7;Q8WZ42-2;Q8WZ42;Q8WZ42-8;A0A1B0GXE3;H0Y4J7	A0A0A0MTS7	Titin	TTN	PAPPKEDVKEKIFQLKAIPKKKVPEKPQVPE	13469	20.753	NaN	NaN	23.0107	NaN	22.9737	21.3773	20.6442	NaN	NaN	NaN	NaN	NaN	22.5537	K	2	___1	1	0.00545222
A0A0A0MTS7;Q8WZ42-12;Q8WZ42-13;Q8WZ42-11;Q8WZ42-4;Q8WZ42-7;Q8WZ42-2;Q8WZ42;Q8WZ42-8;Q8WZ42-5;A0A0A0MRA3;Q8WZ42-3;Q8WZ42-10;Q8WZ42-9	A0A0A0MTS7	Titin	TTN	KIGTGPPTESKPVIAKTKYDKPGRPDPPEVT	20958	NaN	NaN	21.4181	20.8588	21.1691	22.389	20.9393	NaN	21.1953	NaN	NaN	NaN	NaN	NaN	K	3	___1	0.997691	0.00258574
A0A0A0MTS7;Q8WZ42-12;Q8WZ42-13;Q8WZ42-11;Q8WZ42-4;Q8WZ42-7;Q8WZ42-2;Q8WZ42;Q8WZ42-8;Q8WZ42-5;A0A0A0MRA3;Q8WZ42-3;Q8WZ42-10;Q8WZ42-9	A0A0A0MTS7	Titin	TTN	KIGVGPPLDSTPTVAKHKFSPPSPPGKPVVT	20266	NaN	21.0035	22.3301	22.4086	21.697	23.462	22.7743	NaN	22.7919	21.9474	NaN	22.1934	20.9739	NaN	K	3	___1	1	5.20408e-08
A0A0A0MTS7;Q8WZ42-12;Q8WZ42-13;Q8WZ42-11;Q8WZ42-4;Q8WZ42-7;Q8WZ42-2;Q8WZ42;Q8WZ42-8;Q8WZ42-5;A0A0A0MRA3;Q8WZ42-3;Q8WZ42-10;Q8WZ42-9	A0A0A0MTS7	Titin	TTN	LPRITDQYRPKWRIPKLSQDDLEIVRPARRR	34623	NaN	NaN	NaN	NaN	NaN	NaN	NaN	22.4481	NaN	NaN	NaN	NaN	NaN	NaN	K	3	___1	1	5.03535e-05
A0A0A0MTS7;Q8WZ42-12;Q8WZ42-13;Q8WZ42-11;Q8WZ42-4;Q8WZ42-7;Q8WZ42-2;Q8WZ42;Q8WZ42-8;Q8WZ42-5;A0A0A0MRA3;Q8WZ42-3;Q8WZ42-10;Q8WZ42-9	A0A0A0MTS7	Titin	TTN	VGIPAETKEGVKITEKPSPPEKLGVTSISKD	28942	NaN	NaN	20.8539	20.1814	NaN	NaN	21.3318	NaN	NaN	NaN	NaN	NaN	20.9886	20.9851	K	2	___1	1	0.00242074
A0A0A0MTS7;Q8WZ42-12;Q8WZ42-13;Q8WZ42-11;Q8WZ42-4;Q8WZ42-7;Q8WZ42-2;Q8WZ42;Q8WZ42-8;Q8WZ42-5;A0A0A0MRA3;Q8WZ42-3;Q8WZ42-10;Q8WZ42-9	A0A0A0MTS7	Titin	TTN	PTYDGGSKITGYIVEKKELPEGRWMKASFTN	25045	23.1648	22.0176	21.9815	21.3746	NaN	23.4156	NaN	22.1635	22.3239	21.0616	22.1224	21.6029	23.5248	23.3785	K	2	___1	1	0.00345136
A0A0A0MTS7;Q8WZ42-12;Q8WZ42-13;Q8WZ42-11;Q8WZ42-4;Q8WZ42-7;Q8WZ42-2;Q8WZ42;Q8WZ42-8;Q8WZ42-5;A0A0A0MRA3;Q8WZ42-3;Q8WZ42-10;Q8WZ42-9	A0A0A0MTS7	Titin	TTN	FVRFSKTENKITLSIKNAKKEHGGKYTVILD	30192	21.6552	NaN	21.9608	22.8149	NaN	24.6209	23.9965	22.5253	NaN	22.1103	21.2707	NaN	23.3268	23.1859	K	2	___1	1	0.000362208
A0A0A0MTS7;Q8WZ42-12;Q8WZ42-13;Q8WZ42-11;Q8WZ42-4;Q8WZ42-7;Q8WZ42-2;Q8WZ42;Q8WZ42-8;Q8WZ42-5;A0A0A0MRA3;Q8WZ42-3;Q8WZ42-10;Q8WZ42-9	A0A0A0MTS7	Titin	TTN	PLDDGGSKITNYIIEKKEVGKDVWMPVTSAS	19519	NaN	NaN	21.3644	20.4401	20.4903	22.0574	NaN	NaN	NaN	NaN	20.5515	20.4466	21.714	21.756	K	2	___1	1	0.000373038
A0A0A0MTS7;Q8WZ42-12;Q8WZ42-13;Q8WZ42-11;Q8WZ42-4;Q8WZ42-7;Q8WZ42-2;Q8WZ42;Q8WZ42-8;Q8WZ42-5;A0A0A0MRA3;Q8WZ42-3;Q8WZ42-10;Q8WZ42-9	A0A0A0MTS7	Titin	TTN	PEKDGGSPITNYIVEKRDVRRKGWQTVDTTV	16690	21.0152	21.144	22.5981	21.6435	NaN	23.6313	22.0633	NaN	22.9515	20.1319	22.306	21.8263	23.6964	22.8306	K	2	___1	1	0.00195117
A0A0A0MTS7;Q8WZ42-12;Q8WZ42-13;Q8WZ42-11;Q8WZ42-4;Q8WZ42-7;Q8WZ42-2;Q8WZ42;Q8WZ42-8;Q8WZ42-5;A0A0A0MRA3;Q8WZ42-3;Q8WZ42-10;Q8WZ42-9	A0A0A0MTS7	Titin	TTN	PKDDGGSKITNYVIEKREANRKTWVHVSSEP	18824	NaN	20.4218	20.9833	NaN	NaN	NaN	NaN	NaN	21.7307	NaN	NaN	NaN	NaN	22.8306	K	2	___1	1	0.00233832
A0A0A0MTS7;Q8WZ42-12;Q8WZ42-13;Q8WZ42-11;Q8WZ42-4;Q8WZ42-7;Q8WZ42-2;Q8WZ42;Q8WZ42-8;Q8WZ42-5;A0A0A0MRA3;Q8WZ42-3;Q8WZ42-10;Q8WZ42-9	A0A0A0MTS7	Titin	TTN	QHLPVSAPPKITQFLKAEASKEIAKLTCVVE	35293	NaN	NaN	NaN	20.0807	NaN	20.7282	NaN	NaN	NaN	NaN	19.518	NaN	NaN	21.0017	K	2	___1	1	0.000648621
A0A0A0MTS7;Q8WZ42-12;Q8WZ42-13;Q8WZ42-11;Q8WZ42-4;Q8WZ42-7;Q8WZ42-2;Q8WZ42;Q8WZ42-8;Q8WZ42-5;A0A0A0MRA3;Q8WZ42-3;Q8WZ42-10;Q8WZ42-9	A0A0A0MTS7	Titin	TTN	PLRDGGSKIVGYSIEKRQGNERWVRCNFTDV	30461	NaN	20.4616	20.0347	NaN	NaN	21.4952	19.9959	NaN	NaN	NaN	21.0463	NaN	NaN	21.3289	K	2	___1	1	0.00532934
A0A0A0MTS7;Q8WZ42-12;Q8WZ42-13;Q8WZ42-11;Q8WZ42-4;Q8WZ42-7;Q8WZ42-2;Q8WZ42;Q8WZ42-8;Q8WZ42-5;A0A0A0MRA3;Q8WZ42-3;Q8WZ42-10;Q8WZ42-9;Q8WZ42-6	A0A0A0MTS7	Titin	TTN	KPSSKYKIEAHGKIYKLTVLNMMKDDEGKYT	2588	NaN	NaN	NaN	NaN	NaN	21.492	NaN	NaN	NaN	NaN	NaN	NaN	NaN	NaN	K	2	___1	1	0.00512619
A0A0A0MTS7;Q8WZ42-12	A0A0A0MTS7	Titin	TTN	APIVPVPEAQEVVPEKKVPKAPPTKPEAPPA	12357	NaN	NaN	NaN	NaN	NaN	NaN	NaN	21.1535	NaN	NaN	NaN	NaN	NaN	NaN	K	3	___1	0.999955	0.00729049
A0A0A0MTS7;Q8WZ42-12;Q8WZ42-13;Q8WZ42-11;Q8WZ42-4;Q8WZ42-7;Q8WZ42-2;Q8WZ42;Q8WZ42-8;Q8WZ42-5;H7C1P9	A0A0A0MTS7	Titin	TTN	PAKVPEVPKKPVPEEKVPVPVPKKVEAPPAK	11260	21.2301	NaN	NaN	NaN	NaN	NaN	NaN	21.1762	NaN	NaN	NaN	NaN	NaN	NaN	K	3	___1	0.985821	0.00737135
A0A0A0MTS7;Q8WZ42-12;Q8WZ42-13;Q8WZ42-11;Q8WZ42-4;Q8WZ42-7;Q8WZ42-2;Q8WZ42;Q8WZ42-8;Q8WZ42-5	A0A0A0MTS7	Titin	TTN	EPATFVEKLEPSQLLKKGDATQLACKVTGTP	5556	NaN	21.536	21.6006	22.2874	NaN	22.9232	NaN	21.5265	NaN	21.0004	21.6072	21.3434	22.6202	22.4048	K	2	___1	1	0.00652228
A0A0A0MTS7;Q8WZ42-12;Q8WZ42-13;Q8WZ42-11;Q8WZ42-4;Q8WZ42-7;Q8WZ42-2;Q8WZ42;Q8WZ42-8;Q8WZ42-5;A0A0A0MRA3;Q8WZ42-3;Q8WZ42-10;Q8WZ42-9	A0A0A0MTS7	Titin	TTN	KVLEADPYFTVKLHDKTAVEKDEITLKCEVS	14240	25.5467	NaN	23.5436	23.9735	21.5239	24.4526	23.7168	25.0794	24.5957	22.7389	22.7595	23.2584	24.4045	24.5684	K	2	___1	1	3.38838e-06
A0A0A0MTS7;Q8WZ42-12;Q8WZ42-13;Q8WZ42-11;Q8WZ42-4;Q8WZ42-7;Q8WZ42-2;Q8WZ42;Q8WZ42-8;Q8WZ42-5;A0A0A0MRA3;Q8WZ42-3;Q8WZ42-10;Q8WZ42-9	A0A0A0MTS7	Titin	TTN	DPYFTVKLHDKTAVEKDEITLKCEVSKDVPV	14245	23.5816	21.4849	22.0983	22.4427	NaN	23.7621	23.8588	23.0027	22.6091	NaN	NaN	20.7526	22.9741	23.2012	K	2	___1	1	0.001012
A0A0A0MTS7;Q8WZ42-12;Q8WZ42-13;Q8WZ42-11;Q8WZ42-4;Q8WZ42-7;Q8WZ42-2;Q8WZ42;Q8WZ42-8;Q8WZ42-5;A0A0A0MRA3;Q8WZ42-3;Q8WZ42-10;Q8WZ42-9	A0A0A0MTS7	Titin	TTN	EIINYVLESRLIGTEKFHKVTNDNLLSRKYT	19330	23.1647	NaN	21.9218	21.1847	21.1935	23.2455	22.5939	22.5421	NaN	21.4906	21.6877	NaN	22.2021	22.3451	K	2	___1	1	0.00197085
A0A0A0MTS7;Q8WZ42-12;Q8WZ42-13;Q8WZ42-11;Q8WZ42-4;Q8WZ42-7;Q8WZ42-2;Q8WZ42;Q8WZ42-8;Q8WZ42-5;H7C1P9	A0A0A0MTS7	Titin	TTN	PAKVPEVPKKLIPEEKKPTPVPKKVEAPPPK	11316	21.7237	NaN	21.6416	22.1325	NaN	22.4138	21.8777	22.8811	21.8706	NaN	21.3602	NaN	22.1269	22.6399	K	3	___1	0.828216	0.00442436
A0A0A0MTS7;Q8WZ42-12;Q8WZ42-13;Q8WZ42-11;Q8WZ42-4;Q8WZ42-7;Q8WZ42-2;Q8WZ42;Q8WZ42-8;Q8WZ42-5;A0A0A0MRA3;Q8WZ42-3;Q8WZ42-10;Q8WZ42-9	A0A0A0MTS7	Titin	TTN	DKHTSGKLIIEGIRLKFLTPLKDVTAKEKES	14498	22.9964	NaN	25.3235	24.9186	24.1444	26.6711	25.3301	22.4538	22.6262	NaN	24.2585	NaN	24.8512	24.7536	K	2	___1	1	0.00200726
A0A0A0MTS7;Q8WZ42-12;Q8WZ42-13;Q8WZ42-11;Q8WZ42-4;Q8WZ42-7;Q8WZ42-2;Q8WZ42;Q8WZ42-8;Q8WZ42-5;A0A0A0MRA3;Q8WZ42-3;Q8WZ42-10;Q8WZ42-9	A0A0A0MTS7	Titin	TTN	GKKTSARLFVTGIRLKFMSPLEDQTVKEGET	14143	NaN	NaN	NaN	20.7876	NaN	22.8395	22.2781	NaN	21.5911	NaN	20.3184	NaN	21.7575	22.3049	K	2	___1	1	0.000129161
A0A0A0MTS7;Q8WZ42-12;Q8WZ42-13;Q8WZ42-11;Q8WZ42-4;Q8WZ42-7;Q8WZ42-2;Q8WZ42;Q8WZ42-8;Q8WZ42-5;A0A0A0MRA3;Q8WZ42-3;Q8WZ42-10;Q8WZ42-9	A0A0A0MTS7	Titin	TTN	TGINKTNIEVEKLLEKHEYNFRICAINKAGV	25474	22.8071	NaN	NaN	NaN	NaN	NaN	NaN	20.6984	NaN	NaN	NaN	NaN	NaN	NaN	K	3	___1	1	0.00424274
A0A0A0MTS7;Q8WZ42-12;Q8WZ42-13;Q8WZ42-11;Q8WZ42-4;Q8WZ42-7;Q8WZ42-2;Q8WZ42;Q8WZ42-8;Q8WZ42-5;A0A0A0MRA3;Q8WZ42-3;Q8WZ42-10;Q8WZ42-9	A0A0A0MTS7	Titin	TTN	SILWVKLNKTPIPQTKFKTTGLEEGVEYEFR	24967	22.2385	NaN	23.1126	22.7413	21.7116	23.6261	NaN	20.748	23.0827	20.6945	22.457	21.4674	23.5788	23.2545	K	2	___1	1	0.00506008
A0A0A0MTS7;Q8WZ42-12;Q8WZ42-13;Q8WZ42-11;Q8WZ42-4;Q8WZ42-7;Q8WZ42-2;Q8WZ42;Q8WZ42-8;Q8WZ42-5;A0A0A0MRA3;Q8WZ42-3;Q8WZ42-10;Q8WZ42-9	A0A0A0MTS7	Titin	TTN	LEQKEKNSILWVKLNKTPIQDTKFKTTGLDE	27124	NaN	NaN	NaN	20.4306	NaN	20.6879	NaN	NaN	21.0209	NaN	NaN	NaN	NaN	NaN	K	2	___1	1	0.00523231
A0A0A0MTS7;Q8WZ42-12;Q8WZ42-13;Q8WZ42-11;Q8WZ42-4;Q8WZ42-7;Q8WZ42-2;Q8WZ42;Q8WZ42-8;Q8WZ42-5;A0A0A0MRA3;Q8WZ42-3;Q8WZ42-10;Q8WZ42-9	A0A0A0MTS7	Titin	TTN	SILWVKLNKTPIQDTKFKTTGLDEGLEYEFK	27131	NaN	NaN	20.9598	20.6231	NaN	22.5307	22.4521	20.6486	22.114	NaN	NaN	NaN	21.9953	21.61	K	2	___1	1	0.00437018
A0A0A0MTS7;Q8WZ42-12;Q8WZ42-13;Q8WZ42-11;Q8WZ42-4;Q8WZ42-7;Q8WZ42-2;Q8WZ42;Q8WZ42-8;Q8WZ42-5;A0A0A0MRA3;Q8WZ42-3;Q8WZ42-10;Q8WZ42-9	A0A0A0MTS7	Titin	TTN	VTRFEISKLTEHQEYKIRVCALNKVGLGEAT	26560	NaN	NaN	NaN	NaN	NaN	NaN	NaN	NaN	20.7967	NaN	NaN	NaN	NaN	NaN	K	3	___1	1	0.00166724
A0A0A0MTS7;Q8WZ42-12;Q8WZ42-13;Q8WZ42-11;Q8WZ42-4;Q8WZ42-7;Q8WZ42-2;Q8WZ42;Q8WZ42-8;Q8WZ42-5;A0A0A0MRA3;Q8WZ42-3;Q8WZ42-10;Q8WZ42-9	A0A0A0MTS7	Titin	TTN	PKYDGGHKLTGYIVEKRDLPSKSWMKANHVN	22880	22.4376	20.5771	21.0232	NaN	NaN	21.6398	20.663	20.939	NaN	NaN	20.9813	20.6363	21.6547	21.2034	K	2	___1	1	0.00345136
A0A0A0MTS7;Q8WZ42-12;Q8WZ42-13;Q8WZ42-11;Q8WZ42-4;Q8WZ42-7;Q8WZ42-2;Q8WZ42;Q8WZ42-8;Q8WZ42-5;A0A0A0MRA3;Q8WZ42-3;Q8WZ42-10;Q8WZ42-9	A0A0A0MTS7	Titin	TTN	GHTKQLTFTVERLVEKTEYEFRVKAKNDAGY	31179	NaN	NaN	NaN	NaN	NaN	20.7383	NaN	NaN	20.9179	NaN	NaN	NaN	NaN	NaN	K	2	___1	1	0.00570549
A0A0A0MTS7;Q8WZ42-12;Q8WZ42-13;Q8WZ42-11;Q8WZ42-4;Q8WZ42-7;Q8WZ42-2;Q8WZ42;Q8WZ42-8;Q8WZ42-5;A0A0A0MRA3;Q8WZ42-3;Q8WZ42-10;Q8WZ42-9	A0A0A0MTS7	Titin	TTN	PELDLRGIYQKLVIAKAGDNIKVEIPVLGRP	23646	22.3849	NaN	NaN	21.3833	20.3915	22.8078	NaN	NaN	22.3347	NaN	20.6966	21.5667	22.3114	22.4737	K	2	___1	1	0.00334843
A0A0A0MTS7;Q8WZ42-12;Q8WZ42-13;Q8WZ42-11;Q8WZ42-4;Q8WZ42-7;Q8WZ42-2;Q8WZ42;Q8WZ42-8;Q8WZ42-5;A0A0A0MRA3;Q8WZ42-3;Q8WZ42-10;Q8WZ42-9;Q8WZ42-6	A0A0A0MTS7	Titin	TTN	SFVIDGKKTTCKLKMKPRPIAILQGLSDQKV	2352	NaN	NaN	NaN	NaN	NaN	NaN	NaN	20.4212	NaN	NaN	NaN	NaN	NaN	NaN	K	3	___1	1	2.25821e-05
A0A0A0MTS7;Q8WZ42-12;Q8WZ42-13;Q8WZ42-11;Q8WZ42-4;Q8WZ42-7;Q8WZ42-2;Q8WZ42;Q8WZ42-8;Q8WZ42-5;A0A0A0MRA3;Q8WZ42-3;Q8WZ42-10;Q8WZ42-9	A0A0A0MTS7	Titin	TTN	ATVNVLDKPGPVRNLKIVDVSSDRCTVCWDP	20872	NaN	NaN	NaN	NaN	NaN	NaN	NaN	20.7296	23.7069	NaN	NaN	NaN	NaN	NaN	K	2	___1	1	0.00249206
A0A0A0MTS7;Q8WZ42-12;Q8WZ42-13;Q8WZ42-11;Q8WZ42-4;Q8WZ42-7;Q8WZ42-2;Q8WZ42;Q8WZ42-8;Q8WZ42-5;A0A0A0MRA3;Q8WZ42-3;Q8WZ42-10;Q8WZ42-9	A0A0A0MTS7	Titin	TTN	IKLKVLDKPGPPASVKINKMYSDRAMLSWEP	21964	NaN	NaN	NaN	NaN	NaN	NaN	NaN	NaN	21.4717	NaN	NaN	NaN	20.1198	20.9654	K	2	___1	1	0.00181772
A0A0A0MTS7;Q8WZ42-12;Q8WZ42-13;Q8WZ42-11;Q8WZ42-4;Q8WZ42-7;Q8WZ42-2;Q8WZ42;Q8WZ42-8;Q8WZ42-5;A0A0A0MRA3;Q8WZ42-3;Q8WZ42-10;Q8WZ42-9	A0A0A0MTS7	Titin	TTN	QILDKPGPPGGPIEFKTVTAEKITLLWRPPA	29544	NaN	NaN	NaN	NaN	NaN	NaN	NaN	NaN	23.3204	NaN	NaN	NaN	NaN	NaN	K	2	___1	1	3.66563e-82
A0A0A0MTS7;Q8WZ42-12;Q8WZ42-13;Q8WZ42-11;Q8WZ42-4;Q8WZ42-7;Q8WZ42-2;Q8WZ42;Q8WZ42-8;Q8WZ42-5;A0A0A0MRA3;Q8WZ42-3;Q8WZ42-10;Q8WZ42-9	A0A0A0MTS7	Titin	TTN	KACRPIKPPGPPINPKLKDKSRETADLVWTK	20379	NaN	NaN	19.2678	NaN	NaN	21.3201	20.5148	NaN	NaN	NaN	NaN	NaN	20.741	21.1056	K	3	___1	1	0.000890695
A0A0A0MTS7;Q8WZ42-12;Q8WZ42-13;Q8WZ42-11;Q8WZ42-4;Q8WZ42-7;Q8WZ42-2;Q8WZ42;Q8WZ42-8;Q8WZ42-5;A0A0A0MRA3;Q8WZ42-3;Q8WZ42-10;Q8WZ42-9	A0A0A0MTS7	Titin	TTN	YDCQKSDAGKYTITLKNVAGTKEGTISIKVV	22626	NaN	NaN	NaN	22.113	NaN	23.3667	22.9303	21.2014	NaN	21.7744	20.6141	NaN	22.1911	22.6412	K	2	___1	1	4.85976e-12
A0A0A0MTS7;Q8WZ42-12;Q8WZ42-13;Q8WZ42-11;Q8WZ42-4;Q8WZ42-7;Q8WZ42-2;Q8WZ42;Q8WZ42-8;Q8WZ42-5;A0A0A0MRA3;Q8WZ42-3;Q8WZ42-10;Q8WZ42-9	A0A0A0MTS7	Titin	TTN	PITPKSDVPIQAPHFKEELRNLNVRYQSNAT	33499	NaN	NaN	NaN	NaN	NaN	NaN	NaN	21.4521	NaN	NaN	NaN	NaN	NaN	NaN	K	3	___1	1	0.00378314
A0A0A0MTS7;Q8WZ42-12;Q8WZ42-13;Q8WZ42-11;Q8WZ42-4;Q8WZ42-7;Q8WZ42-2;Q8WZ42;Q8WZ42-8;Q8WZ42-5;A0A0A0MRA3;Q8WZ42-3;Q8WZ42-10;Q8WZ42-9	A0A0A0MTS7	Titin	TTN	TNLQFMGQAFKSIHEKVSKISETKKSDQKTT	35385	NaN	NaN	NaN	NaN	NaN	NaN	NaN	20.78	NaN	NaN	NaN	NaN	NaN	NaN	K	3	___1	1	0.00704618
A0A0A0MTS7;Q8WZ42-12;Q8WZ42-13;Q8WZ42-11;Q8WZ42-4;Q8WZ42-7;Q8WZ42-2;Q8WZ42;Q8WZ42-8;Q8WZ42-5;A0A0A0MRA3;Q8WZ42-3;Q8WZ42-10;Q8WZ42-9	A0A0A0MTS7	Titin	TTN	PLEVSSVVIIKSPFEKPGAPGKPTITAVTKD	33392	NaN	NaN	NaN	NaN	NaN	22.5273	NaN	NaN	NaN	NaN	NaN	NaN	NaN	NaN	K	3	___1	0.991757	0.00671569
A0A0A0MTS7;Q8WZ42-12;Q8WZ42-13;Q8WZ42-11;Q8WZ42-4;Q8WZ42-7;Q8WZ42-2;Q8WZ42;Q8WZ42-8;Q8WZ42-5;A0A0A0MRA3;Q8WZ42-3;Q8WZ42-10;Q8WZ42-9	A0A0A0MTS7	Titin	TTN	IENVPKKSTVTIVDSKRSDTGTYIIEAVNVC	16322	22.3013	22.7537	23.1124	NaN	21.2263	23.3537	23.0164	21.6607	22.8793	21.9792	21.8695	NaN	23.0422	22.8813	K	2	___1	1	0.000283214
A0A0A0MTS7;Q8WZ42-12;Q8WZ42-13;Q8WZ42-11;Q8WZ42-4;Q8WZ42-7;Q8WZ42-2;Q8WZ42;Q8WZ42-8;Q8WZ42-5;A0A0A0MRA3;Q8WZ42-3;Q8WZ42-10;Q8WZ42-9	A0A0A0MTS7	Titin	TTN	TGLSRPRRTAMSIKTKLTSGEAPGIRKEMKD	33094	NaN	21.8243	21.7051	21.2419	NaN	22.3494	21.6897	NaN	22.0971	NaN	20.5949	NaN	22.1856	22.2345	K	2	___1	1	0.000476561
A0A0A0MTS7;Q8WZ42-12;Q8WZ42-13;Q8WZ42-11;Q8WZ42-4;Q8WZ42-7;Q8WZ42-2;Q8WZ42;Q8WZ42-8;Q8WZ42-5;A0A0A0MRA3;Q8WZ42-3;Q8WZ42-10;Q8WZ42-9	A0A0A0MTS7	Titin	TTN	TGKWVRVNKTPIADLKFRVTGLYEGNTYEFR	20329	NaN	NaN	21.4739	21.1147	NaN	22.5503	22.4013	NaN	NaN	NaN	NaN	NaN	21.8163	22.4103	K	2	___1	1	0.00391688
A0A0A0MTS7;Q8WZ42-12;Q8WZ42-13;Q8WZ42-11;Q8WZ42-4;Q8WZ42-7;Q8WZ42-2;Q8WZ42;Q8WZ42-8;Q8WZ42-5;A0A0A0MRA3;Q8WZ42-3;Q8WZ42-10;Q8WZ42-9	A0A0A0MTS7	Titin	TTN	DRTHIKTTPATLALEKIKAKRSDSGKYCVVV	19446	21.7773	NaN	22.9007	23.3945	23.4509	24.864	23.786	20.9805	22.5626	22.0049	22.0416	NaN	24.2966	24.1717	K	2	___1	1	0.000713467
A0A0A0MTS7;Q8WZ42-12;Q8WZ42-13;Q8WZ42-11;Q8WZ42-4;Q8WZ42-7;Q8WZ42-2;Q8WZ42;Q8WZ42-8;Q8WZ42-5;A0A0A0MRA3;Q8WZ42-3;Q8WZ42-10;Q8WZ42-9	A0A0A0MTS7	Titin	TTN	SVKDAVRVDSGNYILKAKNVAGERSVTVNVK	25185	NaN	NaN	20.906	NaN	NaN	22.4963	22.0092	NaN	21.8544	NaN	20.4394	NaN	21.5106	21.8824	K	2	___1	1	0.00103396
A0A0A0MTS7;Q8WZ42-12;Q8WZ42-13;Q8WZ42-11;Q8WZ42-4;Q8WZ42-7;Q8WZ42-2;Q8WZ42;Q8WZ42-8;Q8WZ42-5;A0A0A0MRA3;Q8WZ42-3;Q8WZ42-10;Q8WZ42-9	A0A0A0MTS7	Titin	TTN	LFGKTSYQFRVIAENKFGLSKPSEPSEPTIT	33767	NaN	NaN	20.4102	21.0018	NaN	22.3351	22.156	NaN	NaN	NaN	NaN	NaN	21.0255	21.1915	K	2	___1	1	0.00137813
A0A0A0MTS7;Q8WZ42-12;Q8WZ42-13;Q8WZ42-11;Q8WZ42-4;Q8WZ42-7;Q8WZ42-2;Q8WZ42;Q8WZ42-8	A0A0A0MTS7	Titin	TTN	PKKPVPEKKVPPKVIKMEEPLPAKVTERHMQ	10871	NaN	NaN	21.9804	NaN	NaN	22.4827	22.0443	NaN	19.6436	NaN	NaN	21.0281	22.1252	20.0196	K	2	___1	1	0.000763156
A0A0A0MTS7;Q8WZ42-12;Q8WZ42-13;Q8WZ42-11;Q8WZ42-4;Q8WZ42-7;Q8WZ42-2;Q8WZ42;Q8WZ42-8;Q8WZ42-5;A0A0A0MRA3;Q8WZ42-3;Q8WZ42-10;Q8WZ42-9	A0A0A0MTS7	Titin	TTN	SSGSKSATIKLKVLDKPGPPASVKINKMYSD	21956	24.946	NaN	22.2631	22.0855	NaN	22.8356	22.785	27.5183	21.6323	26.5586	NaN	NaN	22.1873	21.7086	K	2	___1	1	0.00521164
A0A0A0MTS7;Q8WZ42-12;Q8WZ42-13;Q8WZ42-11;Q8WZ42-4;Q8WZ42-7;Q8WZ42-2;Q8WZ42;Q8WZ42-8;Q8WZ42-5;A0A0A0MRA3;Q8WZ42-3;Q8WZ42-10;Q8WZ42-9	A0A0A0MTS7	Titin	TTN	STVSVKVLDTPAACQKLQVKHVSRGTVTLLW	29939	NaN	NaN	NaN	NaN	NaN	NaN	NaN	NaN	19.7702	NaN	NaN	NaN	NaN	NaN	K	2	___1	1	0.000440785
A0A0A0MTS7;Q8WZ42-12;Q8WZ42-13;Q8WZ42-11;Q8WZ42-4;Q8WZ42-7;Q8WZ42-2;Q8WZ42;Q8WZ42-8;Q8WZ42-5;A0A0A0MRA3;Q8WZ42-3;Q8WZ42-10;Q8WZ42-9	A0A0A0MTS7	Titin	TTN	VNVRVLDTPGPPQDLKVKEVTKTSVTLTWDP	24527	NaN	NaN	NaN	20.824	NaN	22.2688	21.2739	NaN	21.7084	NaN	NaN	NaN	21.7891	21.5714	K	2	___1	1	0.000149718
A0A0A0MTS7;Q8WZ42-12;Q8WZ42-13;Q8WZ42-11;Q8WZ42-4;Q8WZ42-7;Q8WZ42-2;Q8WZ42;Q8WZ42-8;Q8WZ42-5;A0A0A0MRA3;Q8WZ42-3;Q8WZ42-10;Q8WZ42-9	A0A0A0MTS7	Titin	TTN	PAGSKTVSVKVLVLDKPGPPRDLEVSEIRKD	19877	21.2057	NaN	21.9278	NaN	NaN	23.3288	22.4781	22.4043	20.3639	NaN	20.7969	NaN	22.5316	22.5845	K	2	___1	1	0.000591457
A0A0A0MTS7;Q8WZ42-12;Q8WZ42-13;Q8WZ42-11;Q8WZ42-4;Q8WZ42-7;Q8WZ42-2;Q8WZ42;Q8WZ42-8;Q8WZ42-5;A0A0A0MRA3;Q8WZ42-3;Q8WZ42-10;Q8WZ42-9	A0A0A0MTS7	Titin	TTN	LERKERNSILWTKVNKTIIHDTQFKAQNLEE	26042	NaN	NaN	NaN	NaN	NaN	22.1178	NaN	NaN	22.8769	NaN	NaN	NaN	NaN	NaN	K	3	___1	1	0.00274752
A0A0A0MTS7;Q8WZ42-12	A0A0A0MTS7	Titin	TTN	PRAKVPEAAQEVVPEKKIPKAPIKKPEAPAV	12303	NaN	NaN	NaN	21.3846	NaN	NaN	NaN	NaN	NaN	NaN	20.7018	NaN	22.3573	22.0145	K	2	___1	1	3.07565e-10
A0A0A0MTS7;Q8WZ42-12	A0A0A0MTS7	Titin	TTN	PPVKVPEAPIEVVPEKKMPLAPPKKPEVPPV	12970	21.2599	NaN	NaN	21.2086	22.067	21.0481	NaN	21.3479	NaN	NaN	NaN	NaN	NaN	NaN	K	2	___1	1	3.70906e-05
A0A0A0MTS7;Q8WZ42-12;Q8WZ42-13;A0A1B0GXE3	A0A0A0MTS7	Titin	TTN	KKPEVLPEKVPKVPEKIIPEKEVSVPIPAEP	13359	21.126	20.8987	22.67	21.5454	22.3127	23.4078	22.7535	21.951	19.2342	21.4863	21.2145	22.4509	23.1894	23.3469	K	2	___1	1	2.05742e-05
A0A0A0MTS7;Q8WZ42-12;Q8WZ42-13;Q8WZ42-11;Q8WZ42-4;Q8WZ42-7;Q8WZ42-2;Q8WZ42;Q8WZ42-8;Q8WZ42-5;H7C1P9	A0A0A0MTS7	Titin	TTN	SKRVEPPPKVPELPEKPAPEEVAPVPIPKKV	10538	21.8085	NaN	NaN	NaN	NaN	NaN	NaN	22.5972	NaN	NaN	NaN	NaN	NaN	NaN	K	3	___1	1	2.17272e-10
A0A0A0MTS7;Q8WZ42-12;Q8WZ42-13;Q8WZ42-11;Q8WZ42-4;Q8WZ42-7;Q8WZ42-2;Q8WZ42;Q8WZ42-8;Q8WZ42-5;A0A0A0MRA3;Q8WZ42-3;Q8WZ42-10;Q8WZ42-9	A0A0A0MTS7	Titin	TTN	LQEGTEYEFRVTAINKAGPGKPSDASKAAYA	22135	NaN	20.5014	20.2066	20.5958	NaN	20.6493	NaN	NaN	21.4466	NaN	NaN	NaN	NaN	NaN	K	2	___1	1	0.000583007
A0A0A0MTS7;Q8WZ42-12;Q8WZ42-13;Q8WZ42-11;Q8WZ42-4;Q8WZ42-7;Q8WZ42-2;Q8WZ42;Q8WZ42-8	A0A0A0MTS7	Titin	TTN	AAKVPMKPKRVVAEEKVPVPRKEVAPPVRVP	11126	NaN	21.0157	20.8107	20.7177	NaN	21.3936	21.0245	NaN	NaN	NaN	20.3904	NaN	NaN	20.8833	K	2	___1	1	0.00106777
A0A0A0MTS7;Q8WZ42-12;Q8WZ42-13;Q8WZ42-11;Q8WZ42-4;Q8WZ42-7;Q8WZ42-2;Q8WZ42;Q8WZ42-8;Q8WZ42-5	A0A0A0MTS7	Titin	TTN	RLFFVSEPQSIRVVEKTTATFIAKVGGDPIP	9712	22.4094	21.5147	22.6408	22.4992	21.0381	23.2554	23.0999	21.6212	23.4224	NaN	21.7903	22.3521	23.3339	23.1345	K	2	___1	1	3.73207e-05
A0A0A0MTS7;Q8WZ42-12;Q8WZ42-13;Q8WZ42-11;Q8WZ42-4;Q8WZ42-7;Q8WZ42-2;Q8WZ42;Q8WZ42-8;Q8WZ42-5;A0A0A0MRA3;Q8WZ42-3;Q8WZ42-10;Q8WZ42-9	A0A0A0MTS7	Titin	TTN	SIDNCDRNDAGKYILKLENSSGSKSAFVTVK	26664	NaN	NaN	20.973	21.1578	NaN	22.2868	22.0283	NaN	NaN	20.2832	NaN	NaN	22.077	21.9496	K	2	___1	1	4.57622e-06
A0A0A0MTS7;Q8WZ42-12;Q8WZ42-13;Q8WZ42-11;Q8WZ42-4;Q8WZ42-7;Q8WZ42-2;Q8WZ42;Q8WZ42-8;Q8WZ42-5;A0A0A0MRA3;Q8WZ42-3;Q8WZ42-10;Q8WZ42-9	A0A0A0MTS7	Titin	TTN	IVVTSTLRHCKYSVTKLIEGKEYLFRVRAEN	17434	NaN	NaN	NaN	NaN	NaN	22.4239	NaN	NaN	NaN	NaN	NaN	NaN	21.1185	21.9177	K	2	___1	1	0.00350007
A0A0A0MTS7;Q8WZ42-12;Q8WZ42-13;Q8WZ42-11;Q8WZ42-4;Q8WZ42-7;Q8WZ42-2;Q8WZ42;Q8WZ42-8;Q8WZ42-5;A0A0A0MRA3;Q8WZ42-3;Q8WZ42-10;Q8WZ42-9	A0A0A0MTS7	Titin	TTN	KFCDRSDSGKYTLTVKNASGTKAVSVMVKVL	31691	NaN	NaN	NaN	NaN	NaN	NaN	NaN	NaN	22.6682	NaN	NaN	NaN	NaN	NaN	K	2	___1	1	1.00966e-06
Q5W0H4;A0A0B4J2C3;P13693	Q5W0H4	Translationally-controlled tumor protein	TPT1	YRDLISHDEMFSDIYKIREIADGLCLEVEGK	19	NaN	NaN	NaN	NaN	NaN	NaN	NaN	21.0015	NaN	NaN	NaN	NaN	NaN	NaN	K	3	___1	1	5.94954e-06
G3V267;G3V5T0;A0A0C4DFM0;G3V4T6;O43708-2;G3V5U6;O43708	G3V267;O43708	Maleylacetoacetate isomerase	GSTZ1	LEEMRPTPRLLPQDPKKRASVRMISDLIAGG	94	25.0684	26.6984	21.2553	24.3196	25.2702	27.8959	26.6296	26.0597	26.1168	25.7031	21.8813	NaN	27.4112	27.1683	K	2	___1	1	0.00397738
G3V267;G3V5T0;A0A0C4DFM0;G3V4T6;O43708-2;A0A0A0MR33;G3V3B9;O43708;O43708-3	G3V267;O43708	Maleylacetoacetate isomerase	GSTZ1	FKVDLTPYPTISSINKRLLVLEAFQVSHPCR	191	NaN	NaN	22.621	22.9228	24.3699	23.7039	27.4328	23.2853	NaN	25.6206	24.4498	NaN	26.1474	25.8407	K	2	___1	1	3.77103e-25
A0A0C4DFM5;Q9UBF9;B4DT68	A0A0C4DFM5	Myotilin	MYOT	DTLLHNGNQRLTYEEKMARRLLGPQNAAAVF	184	22.9929	22.0924	21.4893	23.1362	22.9625	23.1878	22.896	22.0682	21.4387	20.6974	23.5165	22.2317	22.7059	22.7749	K	2	___1	1	0.00217449
A0A0C4DFM5;Q9UBF9;B4DT68;Q9UBF9-2	A0A0C4DFM5	Myotilin	MYOT	SWYLNGRTVQSDDLHKMIVSEKGLHSLIFEV	297	NaN	NaN	NaN	20.4757	22.3565	23.3022	22.7041	21.9345	NaN	20.353	21.4565	22.29	22.1629	22.9327	K	3	___1	1	2.958e-05
A0A0C4DFU2;P04179-4;P04179;F5H3C5;F5H4R2;A0A0C4DFU1;F5GYZ5;P04179-2;G8JLJ2	A0A0C4DFU2	Superoxide dismutase;Superoxide dismutase [Mn], mitochondrial	SOD2	GELLEAIKRDFGSFDKFKEKLTAASVGVQGS	130	32.5452	29.1387	31.4859	30.75	33.4753	32.4589	31.624	33.0575	30.1848	34.3316	33.0408	33.8804	33.194	32.9337	K	2	___1	1	2.09179e-22
A0A0C4DFU2;P04179-4;P04179;F5H3C5;F5H4R2;A0A0C4DFU1;F5GYZ5;P04179-2;G8JLJ2	A0A0C4DFU2	Superoxide dismutase;Superoxide dismutase [Mn], mitochondrial	SOD2	PNGGGEPKGELLEAIKRDFGSFDKFKEKLTA	122	32.0039	30.0532	30.3169	30.124	28.6505	31.0894	30.1287	33.1583	30.4033	32.4676	30.9338	31.0639	31.4536	31.4921	K	2	___1	1	0.000401849
A0A0C4DFU2;P04179-4;P04179;F5H3C5;F5H4R2;A0A0C4DFU1;F5GYZ5;P04179-2;G8JLJ2;A0A0C4DG56;P04179-3;G5E9P6;F5GXZ9	A0A0C4DFU2	Superoxide dismutase;Superoxide dismutase [Mn], mitochondrial	SOD2	KHHAAYVNNLNVTEEKYQEALAKGDVTAQIA	68	29.8861	NaN	22.7599	23.6333	23.7824	22.2901	NaN	30.4903	NaN	26.2805	27.3149	26.4115	24.1001	24.9738	K	3	___1	1	9.44487e-135
A0A0C4DFU2;P04179-4;P04179;F5H3C5;F5H4R2;A0A0C4DFU1;F5GYZ5;P04179-2;G8JLJ2;A0A0C4DG56;P04179-3;G5E9P6;F5GXZ9	A0A0C4DFU2	Superoxide dismutase;Superoxide dismutase [Mn], mitochondrial	SOD2	NNLNVTEEKYQEALAKGDVTAQIALQPALKF	75	NaN	NaN	NaN	NaN	NaN	23.2987	NaN	23.0812	NaN	25.0869	24.32	23.6778	25.7011	25.4341	K	3	___1	1	2.65805e-33
A0A0C4DGA2;O75521-2;O75521	A0A0C4DGA2	Enoyl-CoA delta isomerase 2, mitochondrial	ECI2	STFQKEVWTRLKAFAKLPPNALRISKEVIRK	309	24.7693	24.771	24.46	24.2643	26.2763	25.9448	22.3497	26.1785	22.4799	25.3063	24.8801	25.9212	26.3517	24.5092	K	2	___1	1	0.000615575
A0A0C4DGA2;O75521-2;O75521	A0A0C4DGA2	Enoyl-CoA delta isomerase 2, mitochondrial	ECI2	KIMSPAKATEMLIFGKKLTAGEACAQGLVTE	274	22.1436	NaN	21.6803	22.8669	23.0333	23.5972	22.9645	21.6579	NaN	26.3082	20.2759	22.6622	23.2683	23.7648	K	2	___1	1	0.000353582
A0A0C4DGA2;O75521-2;O75521;F1LLU7;F8WAW4;C9JB63;F8W6J1	A0A0C4DGA2	Enoyl-CoA delta isomerase 2, mitochondrial	ECI2	MRASQKDFENSMNQVKLLKKDPGNEVKLKLY	21	20.1592	NaN	NaN	NaN	22.3114	23.2763	NaN	NaN	NaN	19.6655	20.0975	22.3211	21.8025	NaN	K	2	___1	1	7.33181e-16
A0A0C4DGA2;O75521-2;O75521	A0A0C4DGA2	Enoyl-CoA delta isomerase 2, mitochondrial	ECI2	ALRISKEVIRKREREKLHAVNAEECNVLQGR	329	24.6056	NaN	NaN	NaN	NaN	NaN	NaN	24.498	NaN	21.5133	20.9503	NaN	21.9612	21.4131	K	3	___1	1	8.22577e-95
A0A0C4DGA2;O75521-2;O75521;F1LLU7;F8WAW4;C9JB63;F8W6J1	A0A0C4DGA2	Enoyl-CoA delta isomerase 2, mitochondrial	ECI2	GPCNMPKPGVFDLINKAKWDAWNALGSLPKE	60	20.7603	NaN	NaN	NaN	NaN	NaN	NaN	23.6498	NaN	NaN	NaN	25.1996	23.7891	NaN	K	2	___1	1	0.000562141
E7ES10;E9PCH5;E7EVY3;B7Z574;A0A0C4DGB5;P20810-8;P20810-2;P20810;P20810-5;P20810-10;P20810-6;E9PDE4;F8W7E0;H0YA91;E7EQK6;H0Y944;D6RBZ8;E7EN75	E7ES10	Calpastatin	CAST	KQAVKTEPEKKSQSTKLSVVHEKKSQEGKPK	43	NaN	22.2801	NaN	22.5521	21.6474	NaN	NaN	NaN	NaN	19.5817	21.1406	NaN	NaN	19.5259	K	3	___1	1	0.00524127
A0A0D9SGD3;Q6P1N9-2;Q6P1N9;E5RGF2;E5RG17;E5RG62;E5RK70;H0YBX2;G5EA19;U3KQS5	A0A0D9SGD3	Putative deoxyribonuclease TATDN1	TATDN1	LDFDRLQFCPKDTQLKYFEKQFELSEQTKLP	76	21.467	NaN	21.2211	21.5328	22.3848	22.4868	21.9768	23.8714	21.6618	23.6711	21.8982	NaN	22.9318	22.5042	K	2	___1	1	0.000369824
A0A0G2JIW1;P0DMV9;P0DMV8;P0DMV8-2;V9GZ37;P17066	A0A0G2JIW1;P17066	Heat shock 70 kDa protein 1B;Heat shock 70 kDa protein 1A;Heat shock 70 kDa protein 6	HSPA1B;HSPA1A;HSPA6	ILNVTATDKSTGKANKITITNDKGRLSKEEI;ILSVTATDRSTGKANKITITNDKGRLSKEEV	501	NaN	22.5489	NaN	22.0221	NaN	NaN	NaN	NaN	NaN	NaN	NaN	21.0585	NaN	NaN	K	2	___1	1	0.00455945
A0A0G2JIW1;P0DMV9;P0DMV8;P0DMV8-2;V9GZ37;P17066	A0A0G2JIW1;P17066	Heat shock 70 kDa protein 1B;Heat shock 70 kDa protein 1A;Heat shock 70 kDa protein 6	HSPA1B;HSPA1A;HSPA6	DKSTGKANKITITNDKGRLSKEEIERMVQEA;DRSTGKANKITITNDKGRLSKEEVERMVHEA	508	23.1373	23.6467	22.6865	24.6342	21.9039	22.9481	NaN	23.8765	NaN	NaN	NaN	NaN	22.371	NaN	K	2	___1	1	0.000363379
A0A0G2JIW1;P0DMV9;P0DMV8;P0DMV8-2	A0A0G2JIW1	Heat shock 70 kDa protein 1B;Heat shock 70 kDa protein 1A	HSPA1B;HSPA1A	NPQNTVFDAKRLIGRKFGDPVVQSDMKHWPF	78	NaN	20.5982	NaN	19.7024	NaN	NaN	NaN	NaN	NaN	NaN	NaN	20.9323	NaN	NaN	K	2	___1	1	0.000664726
A0A0G2JIW1;P0DMV9;P0DMV8;P0DMV8-2;V9GZ37	A0A0G2JIW1	Heat shock 70 kDa protein 1B;Heat shock 70 kDa protein 1A	HSPA1B;HSPA1A	TLEPVEKALRDAKLDKAQIHDLVLVGGSTRI	329	NaN	NaN	NaN	NaN	NaN	NaN	NaN	21.7306	NaN	NaN	NaN	NaN	NaN	NaN	K	3	___1	1	0.000190705
A0A0G2JIW1;P0DMV9;P0DMV8;P0DMV8-2;V9GZ37	A0A0G2JIW1	Heat shock 70 kDa protein 1B;Heat shock 70 kDa protein 1A	HSPA1B;HSPA1A	EDFDNRLVNHFVEEFKRKHKKDISQNKRAVR	247	23.8781	21.9478	20.7598	21.8253	22.3174	NaN	NaN	25.4147	NaN	NaN	21.0213	NaN	21.1064	NaN	K	3	___1	1	2.17866e-09
A0A0G2JIW1;P0DMV9;P0DMV8;P0DMV8-2	A0A0G2JIW1	Heat shock 70 kDa protein 1B;Heat shock 70 kDa protein 1A	HSPA1B;HSPA1A	KNQVALNPQNTVFDAKRLIGRKFGDPVVQSD	72	21.8453	23.3639	23.0806	24.0286	24.5602	23.1023	23.1661	23.261	21.8133	23.5266	23.4446	22.8236	22.5247	23.4242	K	2	___1	1	2.13238e-61
A0A0G2JIW1;P0DMV9;P0DMV8;P0DMV8-2;V9GZ37;P17066;P48741	A0A0G2JIW1;P17066	Heat shock 70 kDa protein 1B;Heat shock 70 kDa protein 1A;Heat shock 70 kDa protein 6;Putative heat shock 70 kDa protein 7	HSPA1B;HSPA1A;HSPA6;HSPA7	ELCSDLFRSTLEPVEKALRDAKLDKAQIHDL;ELCSDLFRSTLEPVEKALRDAKLDKAQIHDV	320	NaN	NaN	22.4254	24.2797	24.5522	24.1348	24.239	24.6453	23.3009	23.3806	24.9531	22.1075	24.3793	25.1386	K	2	___1	1	1.92132e-06
A0A0G2JIW1;P0DMV9;P0DMV8;P0DMV8-2;V9GZ37	A0A0G2JIW1	Heat shock 70 kDa protein 1B;Heat shock 70 kDa protein 1A	HSPA1B;HSPA1A	DLVLVGGSTRIPKVQKLLQDFFNGRDLNKSI	349	23.1941	NaN	NaN	24.1954	23.6063	NaN	21.6015	24.0227	NaN	NaN	23.8507	NaN	NaN	NaN	K	2	___1	1	5.76878e-23
C9K0U8;A0A0G2JLD8;E7EUY5;Q04837	C9K0U8	Single-stranded DNA-binding protein, mitochondrial	SSBP1	SVFRPGLRDVAYQYVKKGSRIYLEGKIDYGE	103	NaN	NaN	22.7249	21.9735	NaN	23.7158	21.2358	23.4473	22.6796	24.0915	22.5509	NaN	23.4651	23.0582	K	2	___1	1	0.00596793
H0YHM6;A0A0J9YWF7;A0A1B0GTY9;A0A1B0GUA1;A0A1B0GTG2;A0A1B0GW82;A0A1B0GW77;P49419-4;P49419-2;P49419;F8WDY6	H0YHM6	Alpha-aminoadipic semialdehyde dehydrogenase	ALDH7A1	ARVRQASVADYEETVKKAREAWKIWADVSLE	91	NaN	NaN	20.9633	21.6417	22.2642	23.5185	21.9806	22.1246	21.7317	23.3521	21.8781	22.7051	23.4196	23.124	K	2	___1	1	6.55611e-20
C9JMH6;A0A0J9YY65;C9JPV4;A0A0J9YWQ3;P08697;A0A0G2JPA8;P08697-2	C9JMH6	Alpha-2-antiplasmin	SERPINF2	LLLLNAIHFQGFWRNKFDPSLTQRDSF____	244	NaN	NaN	NaN	NaN	NaN	NaN	NaN	NaN	NaN	20.5454	21.0424	NaN	21.5685	21.3845	K	2	___1	1	0.0069386
A0A0J9YXN7;Q96Q06-2;Q96Q06	A0A0J9YXN7;Q96Q06-2	Perilipin-4	PLIN4	RDTLAQLQDCFRLIEKAQQAPEGQPRLDQGS	1289	NaN	22.7393	22.0497	22.5809	20.5949	21.7484	20.211	NaN	NaN	NaN	21.6526	21.5594	21.5157	21.5511	K	2	___1	1	5.66244e-16
A0A0U1RQF0;P49327	A0A0U1RQF0	Fatty acid synthase;[Acyl-carrier-protein] S-acetyltransferase;[Acyl-carrier-protein] S-malonyltransferase;3-oxoacyl-[acyl-carrier-protein] synthase;3-oxoacyl-[acyl-carrier-protein] reductase;3-hydroxyacyl-[acyl-carrier-protein] dehydratase;Enoyl-[acyl-carrier-protein] reductase;Oleoyl-[acyl-carrier-protein] hydrolase	FASN	LSLGCRVFTTVGSAEKRAYLQARFPQLDSTS	1702	23.2308	NaN	24.1635	24.6616	23.1716	24.2453	21.674	22.5828	22.7568	23.1724	24.5858	NaN	23.9028	23.7331	K	2	___1	1	1.85377e-07
A0A0U1RRL8;Q8TB22-3;Q8TB22;Q8TB22-2	A0A0U1RRL8	Spermatogenesis-associated protein 20	SPATA20	VLGQDRLINYATNGAKFLKRHMFDVASGRLM	537	21.8623	NaN	21.2646	NaN	22.5957	23.156	20.9025	23.4495	NaN	25.453	23.0694	NaN	23.9788	22.1473	K	2	___1	1	8.63477e-19
A0A1B0GTB8;A0A1B0GWC0;A0A1B0GVF3;P23786;A0A1B0GV75;A0A1B0GTM0;A0A1B0GUD9	A0A1B0GTB8	Carnitine O-palmitoyltransferase 2, mitochondrial	CPT2	PTMHYQDSLPRLPIPKLEDTIRRYLSAQKPL	56	22.1534	NaN	25.385	23.3944	25.527	25.3357	24.6788	23.5664	NaN	26.3959	23.5635	NaN	25.7066	25.2265	K	2	___1	1	0.000696251
A0A1B0GWJ0;A0A1B0GTJ7;P30566;A0A0A6YY92;P30566-2;A0A1B0GTG9;A0A1B0GWF8;A0A096LNY6;A0A096LPA2	A0A1B0GWJ0	Adenylosuccinate lyase	ADSL	EPFEKQQIGSSAMPYKRNPMRSERCCSLARH	295	24.4514	21.6174	22.3592	22.8022	22.4065	22.9441	21.5507	24.3656	21.2363	22.4672	23.7215	21.4774	22.3074	22.8103	K	2	___1	1	0.00017821
A0A1B0GW44;A0A1B0GV23;A0A1B0GVD5;A0A1B0GWE8;A0A1B0GU92;A0A1B0GU03;P07339;H7C469;H7C1V0;A0A1B0GVP3;A0A1B0GVF1	A0A1B0GW44	Cathepsin D;Cathepsin D light chain;Cathepsin D heavy chain	CTSD	STLPAITLKLGGKGYKLSPEDYTLKVSQAGK	341	NaN	NaN	NaN	20.8128	21.9117	NaN	NaN	NaN	NaN	NaN	20.1272	21.2758	NaN	NaN	K	2	___1	1	0.000937118
A0A1B0GW44;A0A1B0GV23;A0A1B0GVD5;A0A1B0GWE8;A0A1B0GU92;A0A1B0GU03;P07339;H7C469;H7C1V0;A0A1B0GVP3	A0A1B0GW44	Cathepsin D;Cathepsin D light chain;Cathepsin D heavy chain	CTSD	MIPCEKVSTLPAITLKLGGKGYKLSPEDYTL	334	22.6581	NaN	NaN	25.1728	25.3706	23.647	24.0068	23.3699	NaN	24.6737	24.6348	NaN	24.6889	24.4909	K	2	___1	1	0.000307919
A0A1B0GWA1;A0A1B0GUX9;A0A1B0GWI4;A0A1B0GU58;P05165-3;P05165-2;P05165	A0A1B0GWA1	Propionyl-CoA carboxylase alpha chain, mitochondrial	PCCA	QEAASSFGDDRLLIEKFIDNPRHIEIQVLGD	222	21.4462	NaN	NaN	NaN	NaN	NaN	NaN	21.4105	NaN	22.4929	NaN	NaN	22.1258	NaN	K	2	___1	1	0.000305987
A0A1B0GWA1;A0A1B0GUX9;A0A1B0GWI4;A0A1B0GU58;P05165-3;P05165-2;P05165	A0A1B0GWA1	Propionyl-CoA carboxylase alpha chain, mitochondrial	PCCA	VKYSSAGTVEFLVDSKKNFYFLEMNTRLQVL	302	NaN	NaN	NaN	NaN	NaN	NaN	NaN	19.9934	NaN	NaN	NaN	NaN	NaN	NaN	K	2	___1	1	0.000660374
A0A1C7CYY2;Q96M83-2;Q96M83-4;Q96M83-3;Q96M83-5;Q96M83	A0A1C7CYY2	Coiled-coil domain-containing protein 7	CCDC7	NIAEIVRLVQRFEELKNRLKQRSKSSVKVML	207	30.7832	25.5447	28.2911	30.2295	30.7199	28.9812	27.409	29.531	27.3648	31.226	30.9716	25.9973	29.1557	29.7259	K	3	___1	1	0.00329056
I3L1K6;A0A1C7CYY4;P12829;I3L4B1	I3L1K6	Myosin light chain 4	MYL4	QGTYEDFVEGLRVFDKESNGTVMGAELRHVL	144	NaN	NaN	NaN	NaN	NaN	NaN	NaN	NaN	NaN	NaN	NaN	20.6404	NaN	NaN	K	2	___1	1	0.00186769
A0A1W2PQV2;H3BUH9;P23434	A0A1W2PQV2	Glycine cleavage system H protein, mitochondrial	GCSH	NPSELDELMSEEAYEKYIKSIEE________	93	NaN	NaN	NaN	NaN	NaN	NaN	NaN	21.7512	NaN	25.2423	NaN	23.4887	22.064	NaN	K	3	___1	1	8.02072e-58
A0A286YFB1;C9JZN9;P45378-4;H9KVA2;F8WA37;P45378-5;P45378-7;P45378-6;P45378-2;P45378-3;P45378;C9JCA5	A0A286YFB1;C9JZN9;H9KVA2	Troponin T, fast skeletal muscle	TNNT3	RREEEDAKRRAEDDLKKKKALSSMGANYSSY	123	28.0759	25.9707	24.6883	26.8218	25.7306	25.1911	23.7888	26.8647	NaN	NaN	24.9983	NaN	23.0508	24.0956	K	2	___1	1	0.00327978
A0A286YFB1;C9JZN9;P45378-4;H9KVA2;F8WA37;P45378-5;P45378-7;P45378-6;P45378-2;P45378-3;P45378;C9JCA5	A0A286YFB1;C9JZN9;H9KVA2	Troponin T, fast skeletal muscle	TNNT3	KALSSMGANYSSYLAKADQKRGKKQTAREMK	141	NaN	NaN	NaN	22.3294	NaN	NaN	NaN	21.2681	NaN	NaN	21.0085	22.4763	NaN	22.762	K	3	___1	1	3.39279e-10
A0A286YFB1;C9JZN9;P45378-4;H9KVA2;F8WA37;P45378-5;P45378-7;P45378-6;P45378-2;P45378-3;P45378;C9JCA5;P13805-2;P13805-3;P13805;K7EQL4;Q3B759;M0QZU8;M0QZY5;M0QX01	A0A286YFB1;C9JZN9;H9KVA2;P13805-2	Troponin T, fast skeletal muscle;Troponin T, slow skeletal muscle	TNNT3;TNNT1	HFEARKKEEEELVALKERIEKRRAERAEQQR;HFEQRKKEEEELVALKERIERRRSERAEQQR	74	23.5191	20.6566	20.2622	22.7198	22.2989	21.348	NaN	23.7086	21.7921	20.7921	22.9462	21.3915	20.9225	23.4855	K	2	___1	1	1.71208e-07
A0A286YFB1;C9JZN9;P45378-4;H9KVA2;F8WA37;P45378-5;P45378-7;P45378-6;P45378-2;P45378-3;P45378;C9JCA5	A0A286YFB1;C9JZN9;H9KVA2	Troponin T, fast skeletal muscle	TNNT3	AERRKPLNIDHLGEDKLRDKAKELWETLHQL	176	28.7414	23.4285	23.6254	24.1323	25.2406	21.2071	23.3229	29.1837	20.6684	22.3062	23.3637	22.8588	NaN	23.1288	K	3	___1	1	8.12304e-94
A0A286YFB1;H9KVA2;F8WA37;P45378-5;P45378-7;P45378-6;P45378-2;P45378-3;P45378	A0A286YFB1;H9KVA2	Troponin T, fast skeletal muscle	TNNT3	LEIDKFEFGEKLKRQKYDITTLRSRIDQAQK	206	27.3449	25.4853	25.4458	26.6447	26.5249	25.7566	NaN	24.2249	26.6413	25.1198	27.2619	27.0945	26.2739	27.3785	K	2	___1	1	0.000388369
A2A274;Q99798	A2A274	Aconitate hydratase, mitochondrial	ACO2	AALEPRHLGGRAIITKSFARIHETNLKKQGL	714	20.7889	24.2959	23.7167	23.25	24.8775	25.1462	NaN	21.3697	22.1496	24.6201	23.9615	NaN	24.7057	24.8401	K	2	___1	1	0.00447457
A2A274;Q99798	A2A274	Aconitate hydratase, mitochondrial	ACO2	LTIQGLKDFTPGKPLKCIIKHPNGTQETILL	764	28.353	NaN	25.3192	23.8603	NaN	24.1729	NaN	27.8734	24.1392	27.3537	27.7905	28.708	28.6855	28.3312	K	2	___1	1	0.00128691
A2A274;Q99798	A2A274	Aconitate hydratase, mitochondrial	ACO2	LKFNPETDYLTGTDGKKFRLEAPDADELPKG	545	28.5992	23.6738	26.6176	25.9857	28.1205	29.0314	26.9127	28.8457	27.5402	29.3515	26.3491	25.8579	27.2112	28.0216	K	2	___1	1	1.00592e-43
A2A274;Q99798	A2A274	Aconitate hydratase, mitochondrial	ACO2	PCIGQWDRKDIKKGEKNTIVTSYNRNFTGRN	490	22.2853	22.1807	21.7416	22.4049	21.4835	23.2428	20.2892	22.7298	23.1464	NaN	NaN	NaN	22.6195	22.5027	K	2	___1	1	3.79914e-14
A2A274;Q99798	A2A274	Aconitate hydratase, mitochondrial	ACO2	AIITKSFARIHETNLKKQGLLPLTFADPADY	725	NaN	NaN	21.6807	22.2781	22.1025	22.3944	21.1584	24.1927	NaN	23.0325	23.394	22.8306	22.7402	22.5146	K	3	___1	1	0.00341398
A2A274;Q99798	A2A274	Aconitate hydratase, mitochondrial	ACO2	TFADPADYNKIHPVDKLTIQGLKDFTPGKPL	748	27.1419	24.4416	24.5893	25.2053	26.718	26.1012	NaN	29.1212	26.3192	27.0653	26.7325	27.1093	26.6745	26.8024	K	3	___1	1	2.42619e-11
A2A274;Q99798	A2A274	Aconitate hydratase, mitochondrial	ACO2	YNKIHPVDKLTIQGLKDFTPGKPLKCIIKHP	755	22.5614	23.5996	23.3445	24.3791	23.9179	24.754	NaN	24.5066	24.0821	26.2369	25.0266	25.1197	26.3284	26.2659	K	3	___1	1	1.67272e-35
A2A274;Q99798	A2A274	Aconitate hydratase, mitochondrial	ACO2	ACGPCIGQWDRKDIKKGEKNTIVTSYNRNFT	487	23.6788	NaN	NaN	NaN	NaN	22.7825	NaN	24.6754	NaN	21.0889	21.9339	NaN	21.962	21.8972	K	3	___1	0.771393	0.000413014
A2A274;Q99798	A2A274	Aconitate hydratase, mitochondrial	ACO2	TNSSYEDMGRSAAVAKQALAHGLKCKSQFTI	426	24.1839	21.135	NaN	21.5425	23.8319	22.9734	21.0676	24.0641	NaN	21.2583	22.9804	24.8268	22.7306	23.6006	K	3	___1	1	1.90629e-23
A2A274;Q99798	A2A274	Aconitate hydratase, mitochondrial	ACO2	PDLAHPVAEVGKVAEKEGWPLDIRVGLIGSC	395	21.4291	NaN	NaN	NaN	NaN	NaN	NaN	21.5615	NaN	NaN	NaN	NaN	NaN	NaN	K	2	___1	1	0.000499976
A2A274;Q99798	A2A274	Aconitate hydratase, mitochondrial	ACO2	SHFEPNEYIHYDLLEKNINIVRKRLNRPLTL	50	23.4488	NaN	NaN	NaN	NaN	NaN	NaN	23.5141	NaN	NaN	NaN	NaN	NaN	NaN	K	4	___1	1	1.09739e-43
A2A274;Q99798	A2A274	Aconitate hydratase, mitochondrial	ACO2	TIHCDHLIEAQVGGEKDLRRAKDINQEVYNF	138	24.3903	NaN	NaN	NaN	NaN	NaN	NaN	25.3203	NaN	NaN	NaN	NaN	NaN	NaN	K	3	___1	1	8.10585e-28
A2RUC4-2	A2RUC4-2			_____MDNLLIQVTGKKRVVLFSPRDAQYLY	11	26.0821	NaN	NaN	NaN	NaN	NaN	NaN	22.425	NaN	NaN	NaN	NaN	NaN	NaN	K	2	___1	1	0.00218363
A3KMH1-2;A3KMH1-3;A3KMH1	A3KMH1-2	von Willebrand factor A domain-containing protein 8	VWA8	ENHVSQASVTIRIADKEVTIKVPAGTRLLSQ	399	NaN	NaN	NaN	NaN	NaN	NaN	NaN	21.2087	NaN	NaN	NaN	NaN	NaN	NaN	K	2	___1	1	0.0034156
A6NHL2-2;C9J2C0;Q9NY65;Q9NY65-2;V9GZ17;P68363;P68363-2;P68366-2;P68366;A6NHL2;Q71U36;Q71U36-2;Q13748;Q9BQE3;F5H5D3	A6NHL2-2;C9J2C0;P68363;P68366-2;Q71U36;Q9BQE3	Tubulin alpha chain-like 3;Tubulin alpha-8 chain;Tubulin alpha-1B chain;Tubulin alpha-4A chain;Tubulin alpha-1A chain;Tubulin alpha-3C/D chain;Tubulin alpha-1C chain	TUBAL3;TUBA8;TUBA1B;TUBA4A;TUBA1A;TUBA3C;TUBA1C	EAWARLDHKFDLMYAKRAFLHWYLREGMEEA;EAWARLDHKFDLMYAKRAFVHWYVGEGMEEG	401	NaN	NaN	NaN	21.2646	20.7433	20.001	19.8069	NaN	NaN	20.6349	20.8623	19.9399	20.4099	20.6835	K	2	___1	1	0.00716651
A6NIT2;A6NMN0;P46020-3;P46020-2;P46020	A6NIT2	Phosphorylase b kinase regulatory subunit alpha, skeletal muscle isoform	PHKA1	EDSQLVELTKQEIITKLQGRYGCCRFLRDGY	286	NaN	NaN	NaN	NaN	NaN	NaN	NaN	NaN	NaN	NaN	20.2362	NaN	NaN	20.6309	K	2	___1	1	0.0019362
A6NKB8;Q9H4A4;C9JMZ3;H7C2T3	A6NKB8	Aminopeptidase B	RNPEP	QDQFDSFLKAYVHEFKFRSILADDFLDFYLE	407	22.3082	NaN	NaN	NaN	NaN	NaN	NaN	22.7976	NaN	NaN	NaN	NaN	NaN	NaN	K	3	___1	1	0.00655193
A6NMQ3;Q5T5H1;O43768-6;O43768-5;O43768-2;O43768;O43768-9;O43768-7;O43768-3;O43768-4;A0A1W2PRU0;O43768-8	A6NMQ3	Alpha-endosulfine	ENSA	YPSLGQKPGGSDFLMKRLQKGVWGIVSYPLS	56	NaN	20.2063	NaN	NaN	NaN	NaN	NaN	NaN	NaN	NaN	NaN	NaN	NaN	NaN	K	2	___1	1	0.00730503
B7ZAR9;A8MT40;Q8NCN5-2;Q8NCN5	B7ZAR9	Pyruvate dehydrogenase phosphatase regulatory subunit, mitochondrial	PDPR	EYEIDIAGYRFQAKAKLYPVASLFTQKRRKD	212	NaN	NaN	NaN	NaN	NaN	23.5645	NaN	21.1354	NaN	NaN	NaN	NaN	NaN	NaN	K	2	___1	1	0.0032097
E9PPJ3;A8MU46	E9PPJ3	Smoothelin-like protein 1	SMTNL1	RPRGPRAQNRKAIVDKFGGAASGPTALFRNT	355	NaN	23.6387	24.3197	25.4433	24.866	22.401	22.3293	21.7136	NaN	23.8485	25.3856	NaN	21.7561	22.1819	K	2	___1	1	4.86992e-42
B0QYF7	B0QYF7	Myoglobin	MB	________MKASEDLKKHGATVLTALGGILK	8	31.7041	29.4786	29.583	29.9317	27.8949	29.4597	28.4374	31.5142	28.1832	28.9636	28.5659	NaN	29.5654	30.0956	K	2	___1	1	0.00234499
B0QYF7	B0QYF7	Myoglobin	MB	_______MKASEDLKKHGATVLTALGGILKK	9	21.5317	NaN	NaN	NaN	NaN	NaN	NaN	NaN	NaN	NaN	NaN	NaN	NaN	NaN	K	2	___1	1	0.000149675
B0QYF7;P02144;B0QYF8;F2Z2F1;Q8WVH6	B0QYF7;P02144	Myoglobin	MB	LGGILKKKGHHEAEIKPLAQSHATKHKIPVK	88	28.9376	NaN	22.3891	20.6985	24.6217	NaN	NaN	28.2848	NaN	NaN	NaN	21.0406	21.5533	23.9657	K	4	___1	1	1.90278e-09
B0QYF7;P02144;B0QYF8;F2Z2F1;Q8WVH6	B0QYF7;P02144	Myoglobin	MB	HHEAEIKPLAQSHATKHKIPVKYLEFISECI	97	29.479	27.4798	27.126	28.1004	27.232	27.1566	26.0699	29.677	26.9542	26.5725	28.0659	26.7756	27.6176	28.7867	K	3	___1	1	8.04316e-157
B0QYF7;P02144;B0QYF8;F2Z2F1;Q8WVH6	B0QYF7;P02144	Myoglobin	MB	KKHGATVLTALGGILKKKGHHEAEIKPLAQS	78	27.9266	26.9041	26.9315	27.0439	29.7558	26.9928	26.2781	28.4359	25.316	27.7589	28.1958	26.5201	26.5799	26.0941	K	2	___1	1	5.45887e-221
B0QYF7;P02144;B0QYF8;F2Z2F1;Q8WVH6	B0QYF7;P02144	Myoglobin	MB	HGATVLTALGGILKKKGHHEAEIKPLAQSHA	80	NaN	NaN	NaN	NaN	NaN	NaN	NaN	21.3094	NaN	NaN	NaN	NaN	NaN	NaN	K	3	___1	1	0.00508421
B0QZ99;B0QZA0;B0QZ88;Q9H7B4-3;Q9H7B4	B0QZ99	Histone-lysine N-methyltransferase SMYD3	SMYD3	RYPPDSVRLLGRVVFKLMDGAPSESEKLYSF	52	25.3781	NaN	NaN	NaN	NaN	NaN	NaN	22.8601	NaN	NaN	NaN	NaN	NaN	NaN	K	2	___1	1	0.000649575
B4DJV2;O75390;A0A0C4DGI3	B4DJV2	Citrate synthase;Citrate synthase, mitochondrial	CS	LTQLQKEVGKDVSDEKLRDYIWNTLNSGRVV	314	22.3027	23.6914	27.0995	26.3967	26.7496	28.005	27.4325	29.7419	25.869	28.4484	26.8092	24.9921	27.9933	27.427	K	2	___1	1	1.50289e-05
B4DJV2;O75390;A0A0C4DGI3;H0YIC4	B4DJV2	Citrate synthase;Citrate synthase, mitochondrial	CS	RKTDPRYTCQREFALKHLPNDPMFKLVAQLY	353	21.7848	NaN	NaN	NaN	NaN	NaN	NaN	24.0053	NaN	23.6354	NaN	NaN	NaN	NaN	K	3	___1	1	0.00528221
B4DJV2;O75390;A0A0C4DGI3;H0YIC4	B4DJV2	Citrate synthase;Citrate synthase, mitochondrial	CS	QREFALKHLPNDPMFKLVAQLYKIVPNVLLE	362	NaN	NaN	NaN	NaN	NaN	NaN	NaN	21.9159	NaN	NaN	NaN	NaN	NaN	NaN	K	3	___1	1	2.02195e-06
B4DJV2;O75390;A0A0C4DGI3;F8VTT8;F8W4S1;H0YH82;F8W642;F8VZK9;F8VX07;F8VRP1;F8VX68;F8VWQ5;F8VPF9;F8VPA1;F8W1S4;F8VRI6	B4DJV2	Citrate synthase;Citrate synthase, mitochondrial	CS	DEGIRFRGFSIPECQKLLPKAKGGEEPLPEG	90	24.9723	NaN	NaN	28.1347	28.5889	30.1696	27.5041	28.4347	27.9749	31.4975	29.6259	NaN	30.92	30.1625	K	2	___1	1	0.00035551
B4DJV2;O75390;A0A0C4DGI3;H0YIC4	B4DJV2	Citrate synthase;Citrate synthase, mitochondrial	CS	HLPNDPMFKLVAQLYKIVPNVLLEQGKAKNP	369	21.8327	NaN	23.8931	22.4785	NaN	24.2399	NaN	21.6973	NaN	24.8967	26.5645	NaN	23.4853	NaN	K	3	___1	1	5.41512e-12
B4DJV2;O75390;A0A0C4DGI3	B4DJV2	Citrate synthase;Citrate synthase, mitochondrial	CS	FPLERPKSMSTEGLMKFVDSKSG________	446	23.7847	22.8165	24.7076	23.1935	25.6143	25.8166	23.4504	24.9987	20.2041	25.769	24.9009	24.1084	25.6472	25.3495	K	2	___1	1	5.09504e-25
E9PRS8;B4DKY1;P49589-2;P49589;P49589-3	E9PRS8	Cysteine--tRNA ligase, cytoplasmic	CARS	NSLTRNKEVFIPQDGKKVTWYCCGPTVYDAS	48	NaN	22.6464	21.9361	22.4657	21.2571	22.0297	21.0986	22.4802	21.0869	NaN	21.534	20.9222	22.0209	22.7895	K	2	___1	1	0.00435416
B4DLN1;P52815	B4DLN1;P52815	39S ribosomal protein L12, mitochondrial	MRPL12	KEIKNYIQGINLVQAKKLVESLPQEIKANVA	162	NaN	NaN	NaN	NaN	NaN	NaN	NaN	20.8475	NaN	NaN	NaN	NaN	NaN	NaN	K	2	___1	1	0.000261334
B4DP64;E5RGR0;O75608-2;O75608;A0A087X1K9;E5RJ48;E5RI35	B4DP64	Acyl-protein thioesterase 1	LYPLA1	KQAAENIKALIDQEVKNGIPSNRIILGGFSQ	105	NaN	NaN	NaN	20.4396	21.7269	21.9144	NaN	NaN	21.1234	NaN	20.5185	20.9361	21.3025	21.877	K	2	___1	1	5.71475e-25
J3QS39;J3QTR3;F5H6Q2;F5GYU3;F5H2Z3;F5H265;B4DV12;F5H388;F5H747;F5GXK7;J3QKN0;Q5PY61;Q96C32;P62987;P62979;P0CG47;P0CG48;M0R1V7;Q49A90;J3QSA3;F5GZ39;M0R1M6;M0R2S1	J3QS39	Ubiquitin-60S ribosomal protein L40;Ubiquitin;60S ribosomal protein L40;Ubiquitin-40S ribosomal protein S27a;Ubiquitin;40S ribosomal protein S27a;Polyubiquitin-B;Ubiquitin;Polyubiquitin-C;Ubiquitin	UBB;RPS27A;UBC;UBA52	EPSDTIENVKAKIQDKEGIPPDQQRLIFAGK	33	NaN	20.7437	22.7844	23.7008	23.2967	23.6375	23.5878	22.1426	20.1524	19.2197	22.1442	21.5197	22.5111	23.1458	K	2	___1	1	1.45797e-05
J3QS39;J3QTR3;F5H6Q2;F5GYU3;F5H2Z3;F5H265;B4DV12;F5H388;F5H747;F5GXK7;J3QKN0;Q5PY61;Q96C32;P62987;P62979;P0CG47;P0CG48;M0R1V7;Q49A90;J3QSA3;F5GZ39	J3QS39	Ubiquitin-60S ribosomal protein L40;Ubiquitin;60S ribosomal protein L40;Ubiquitin-40S ribosomal protein S27a;Ubiquitin;40S ribosomal protein S27a;Polyubiquitin-B;Ubiquitin;Polyubiquitin-C;Ubiquitin	UBB;RPS27A;UBC;UBA52	__________MQIFVKTLTGKTITLEVEPSD	6	25.1536	23.8046	25.6465	26.5242	26.8291	27.1141	25.9325	25.457	24.1686	25.5599	26.0194	26.2843	26.0501	26.1632	K	2	___1	1	4.3211e-08
J3QS39;J3QTR3;F5H6Q2;F5GYU3;F5H2Z3;F5H265;B4DV12;F5H388;F5H747;F5GXK7;J3QKN0;Q5PY61;Q96C32;P62987;P62979;P0CG47;P0CG48;M0R1V7;Q49A90;J3QSA3;F5GZ39	J3QS39	Ubiquitin-60S ribosomal protein L40;Ubiquitin;60S ribosomal protein L40;Ubiquitin-40S ribosomal protein S27a;Ubiquitin;40S ribosomal protein S27a;Polyubiquitin-B;Ubiquitin;Polyubiquitin-C;Ubiquitin	UBB;RPS27A;UBC;UBA52	TITLEVEPSDTIENVKAKIQDKEGIPPDQQR	27	23.3124	24.5219	23.1277	25.7207	25.0276	25.1576	NaN	23.0086	23.0381	25.2386	23.4383	24.7357	25.3748	23.6927	K	2	___1	1	2.39194e-94
H7C1Y0;B5MC44;Q9UDX4-3;Q9UDX4-2;Q9UDX4	H7C1Y0	SEC14-like protein 3	SEC14L3	LEENYPETLKFMLIVKATKLFPVGYNLMKPF	159	NaN	NaN	NaN	NaN	NaN	NaN	NaN	NaN	24.0366	NaN	21.0544	NaN	21.2001	21.5938	K	2	___1	1	0.00620007
B7Z863;B7Z964;Q14BN4-5;H7C3M8;H7BZK0;Q14BN4-4;Q14BN4-2;Q14BN4-3;Q14BN4	B7Z863	Sarcolemmal membrane-associated protein	SLMAP	VQKEYEKTQTVLSELKLKFEMTEQEKQSITD	258	NaN	NaN	NaN	22.2476	NaN	NaN	NaN	NaN	NaN	NaN	21.5761	NaN	21.9372	NaN	K	2	___1	1	0.00336156
B7Z9I1;Q5T4U5;P11310;P11310-2;H0YDT5	B7Z9I1	Medium-chain specific acyl-CoA dehydrogenase, mitochondrial	ACADM	AGAVGLAQRALDEATKYALERKTFGKLLVEH	265	NaN	NaN	NaN	NaN	22.1953	NaN	NaN	NaN	NaN	NaN	NaN	NaN	21.0528	20.7685	K	2	___1	1	0.000480472
B7Z9I1;Q5T4U5;P11310;P11310-2	B7Z9I1	Medium-chain specific acyl-CoA dehydrogenase, mitochondrial	ACADM	KVPKENVLIGDGAGFKVAMGAFDKTRPVVAA	235	24.9466	NaN	25.2894	25.4916	27.1753	27.3208	25.8606	26.3703	23.7427	29.4598	27.8194	26.6327	27.2439	26.1676	K	3	___1	1	5.88999e-50
B7Z9I1;Q5T4U5;P11310;P11310-2	B7Z9I1	Medium-chain specific acyl-CoA dehydrogenase, mitochondrial	ACADM	GQRCSDTRGIVFEDVKVPKENVLIGDGAGFK	220	25.5697	26.9696	28.1771	27.7117	29.3046	28.568	27.397	26.4222	27.2028	29.3118	28.1046	28.8535	28.7551	27.624	K	2	___1	1	8.69802e-07
B8ZZ19;P20472;H0Y3U0	B8ZZ19	Parvalbumin alpha	PVALB	KKAVGAFSATDSFDHKKFFQMVGLKKKSADD	28	NaN	NaN	NaN	22.7202	NaN	NaN	NaN	NaN	NaN	NaN	22.5514	21.6562	20.1793	21.3875	K	3	___1	1	0.000350903
B8ZZX2;B8ZZV9;Q9H8M1-2;Q9H8M1	B8ZZX2	Coenzyme Q-binding protein COQ10 homolog B, mitochondrial	COQ10B	EVVKQMVAAFERRACKLYGPETNIPRELMLH	168	25.3421	NaN	NaN	22.5538	22.9249	24.4246	21.6675	24.2994	23.4733	24.2014	22.2461	NaN	24.895	23.2551	K	2	___1	1	8.18984e-05
C0MHM2	C0MHM2		SGMS1	ILVGLWLIQWLLLKYKDVGNESRVVMIFLSI	208	27.8547	NaN	NaN	NaN	NaN	NaN	NaN	25.597	NaN	NaN	NaN	NaN	NaN	23.5805	K	2	___1	1	0.00728631
C9J0K6;P30626-3;P30626-2;P30626	C9J0K6	Sorcin	SRI	TMGFRLSPQAVNSIAKRYSTNGKITFDDYIA	103	NaN	21.1439	NaN	NaN	20.6835	NaN	NaN	NaN	NaN	NaN	NaN	NaN	NaN	NaN	K	2	___1	1	0.00556627
C9J2Q2;Q8N5M1	C9J2Q2	ATP synthase mitochondrial F1 complex assembly factor 2	ATPAF2	NPTQRNKDQLIRAAVKFLDTDTICYRVEEPE	133	NaN	NaN	NaN	NaN	NaN	NaN	NaN	21.5004	NaN	24.112	NaN	NaN	NaN	NaN	K	2	___1	1	2.61796e-08
C9J406;H7C463;Q16891-2;Q16891;B9A067	C9J406;H7C463;Q16891-2	MICOS complex subunit MIC60	IMMT	IDQLNRELAEQKATEKQHITLALEKQKLEEK	416	23.795	NaN	NaN	21.411	21.5072	21.9175	NaN	23.7033	NaN	18.9591	20.8008	NaN	20.9347	22.0512	K	3	___1	1	4.04786e-05
C9J406;H7C463;Q16891-2;Q16891;B9A067	C9J406;H7C463;Q16891-2	MICOS complex subunit MIC60	IMMT	KERRKAVDEAADALLKAKEELEKMKSVIENA	286	NaN	NaN	NaN	NaN	NaN	NaN	NaN	NaN	19.9915	20.8493	NaN	NaN	NaN	21.2382	K	2	___1	1	0.000714233
C9J406;H7C463;Q16891-2;Q16891;B9A067	C9J406;H7C463;Q16891-2	MICOS complex subunit MIC60	IMMT	VYSEETLRARFYAVQKLARRVAMIDETRNSL	629	20.9859	NaN	NaN	NaN	NaN	NaN	NaN	21.6949	NaN	NaN	NaN	NaN	NaN	NaN	K	2	___1	1	0.00222249
C9J5D1;E7EQ69;Q9GZZ1;C9JZU6;A0A087WWJ2;F8WCK0;C9J5J3;A0A0D9SF32	C9J5D1	N-alpha-acetyltransferase 50	NAA50	LNQVIFPVSYNDKFYKDVLEVGELAKLGTKM	37	21.8584	NaN	NaN	NaN	NaN	NaN	NaN	20.5402	NaN	NaN	NaN	NaN	NaN	NaN	K	2	___1	1	0.00230996
C9J5D1;E7EQ69;Q9GZZ1;C9JZU6;A0A087WWJ2;F8WCK0;C9J5J3;A0A0D9SF32;Q9GZZ1-2	C9J5D1;Q9GZZ1-2	N-alpha-acetyltransferase 50	NAA50	KGSRIELGDVTPHNIKQLKRLNQVIFPVSYN	17	20.6757	NaN	NaN	NaN	NaN	NaN	NaN	21.758	NaN	NaN	NaN	NaN	NaN	NaN	K	3	___1	1	7.03795e-05
C9J5D1;E7EQ69;Q9GZZ1;C9JZU6;A0A087WWJ2;F8WCK0;C9J5J3;A0A0D9SF32	C9J5D1	N-alpha-acetyltransferase 50	NAA50	LKRLNQVIFPVSYNDKFYKDVLEVGELAKLG	34	26.2487	26.696	27.4256	27.8504	27.5341	27.5657	26.236	26.5215	25.0578	28.347	29.3216	26.8042	27.8053	27.7405	K	3	___1	1	3.35658e-46
C9J712;P35080;C9J2N0;C9J0J7;C9JQ45;G5E9Q6;P35080-2	C9J712	Profilin-2;Profilin	PFN2	KDREGFFTNGLTLGAKKCSVIRDSLYVDGDC	20	NaN	NaN	NaN	NaN	NaN	NaN	NaN	NaN	NaN	NaN	NaN	21.5458	NaN	NaN	K	2	___1	1	0.000990668
H0YC52;H7C396;C9J7Q4;H7BZ58;Q8NFV4-3;Q8NFV4-2;Q8NFV4-5;Q8NFV4-6;Q8NFV4-4;Q8NFV4	H0YC52	Alpha/beta hydrolase domain-containing protein 11	ABHD11	LHGLFGSKTNFNSIAKILAQQTGRRG_____	77	NaN	NaN	NaN	NaN	NaN	NaN	NaN	21.0207	NaN	NaN	NaN	NaN	NaN	NaN	K	3	___1	1	1.49337e-05
C9J8Q5;P51649;P51649-2	C9J8Q5	Succinate-semialdehyde dehydrogenase, mitochondrial	ALDH5A1	RGIHDAFVKAFAEAMKKNLRVGNGFEEGTTQ	337	28.5268	21.9249	25.9207	25.7532	26.3125	26.6442	26.8539	29.1396	23.9757	27.8416	26.4811	26.5172	27.1802	27.1497	K	2	___1	1	0.00118999
C9J8Q5;P51649;P51649-2	C9J8Q5	Succinate-semialdehyde dehydrogenase, mitochondrial	ALDH5A1	TQGPLINEKAVEKVEKQVNDAVSKGATVVTG	366	NaN	22.8619	23.5846	23.3361	23.1759	24.029	22.8605	26.1798	21.8805	24.2297	24.0188	NaN	24.2731	24.1602	K	2	___1	1	1.86049e-07
C9J8Q5;P51649;P51649-2	C9J8Q5	Succinate-semialdehyde dehydrogenase, mitochondrial	ALDH5A1	NGFEEGTTQGPLINEKAVEKVEKQVNDAVSK	359	23.6178	NaN	24.5467	24.228	26.0882	26.1113	25.3568	26.8939	24.5634	26.9747	26.0157	24.414	26.301	26.6803	K	3	___1	1	1.13492e-90
C9J8T6;Q14061	C9J8T6	Cytochrome c oxidase copper chaperone	COX17	PGLVDSNPAPPESQEKKPLKPCCACPETKKA	17	NaN	21.2132	NaN	21.6044	22.4978	20.9302	NaN	NaN	NaN	NaN	21.7283	23.0697	21.012	22.216	K	2	___1	1	1.0756e-93
C9JEU5;C9JC84;P02679-2;P02679	C9JEU5	Fibrinogen gamma chain	FGG	GWTVFQKRLDGSVDFKKNWIQYKEGFGHLSP	239	24.9036	23.1733	24.1112	23.1355	22.4268	21.9221	22.2481	23.6412	21.801	23.2667	23.0282	21.2013	23.5286	24.1485	K	2	___1	1	0.00353294
C9JEU5;C9JC84;P02679-2;P02679	C9JEU5	Fibrinogen gamma chain	FGG	PDESSKPNMIDAATLKSRKMLEEIMKYEASI	111	NaN	NaN	21.9125	19.6849	NaN	NaN	NaN	NaN	NaN	NaN	20.8178	NaN	NaN	20.9459	K	2	___1	1	0.000234207
C9JEA7;Q9BRC7	C9JEA7	Phosphoinositide phospholipase C;1-phosphatidylinositol 4,5-bisphosphate phosphodiesterase delta-4	PLCD4	KPDFLRDIQSSFHPEKPISPFKAQTLLIQVI	651	NaN	NaN	NaN	NaN	NaN	NaN	NaN	21.7793	NaN	NaN	NaN	NaN	NaN	NaN	K	3	___1	1	0.00481238
C9JF17;P05090	C9JF17	Apolipoprotein D	APOD	VDSLKNILTSNNIDVKKMTVTDQVNCPK___	203	NaN	NaN	NaN	NaN	NaN	NaN	NaN	NaN	NaN	NaN	20.7816	21.782	20.9805	21.8404	K	2	___1	1	0.000225357
C9JFR7;P99999	C9JFR7	Cytochrome c	CYCS	PKKYIPGTKMIFVGIKKKEERADLIAYLKK_	87	20.6894	NaN	21.2482	22.5792	22.426	22.8773	22.9342	22.5176	NaN	21.7147	21.5237	NaN	21.8974	23.1188	K	2	___1	1	0.00430169
E7ETT4;E7ETT1;E9PDR0;C9JQS9;E7EX59;P05166;P05166-2;C9JVY9;E7ENC1;F8WBI9;C9JAW3;C9JVW9;H7C5C9	E7ETT4	Propionyl-CoA carboxylase beta chain, mitochondrial	PCCB	VEHRCADFGMAADKNKFPGDSVVTGRGRING	101	NaN	NaN	24.6158	24.8387	26.1912	26.3552	25.4717	26.5374	25.4413	25.3542	25.4136	23.3033	26.2354	26.171	K	2	___1	1	0.000495814
C9JRZ6;F8WAR4;Q9NX63	C9JRZ6	MICOS complex subunit MIC19	CHCHD3	VTTEQYQKAAEEVEAKFKRYESHPVCADLQA	178	23.21	23.7188	23.1145	22.8709	23.271	23.1601	24.2441	24.4572	22.3337	23.3244	23.6579	21.2564	23.5516	22.595	K	2	___1	1	0.000114701
C9JRZ6;F8WAR4;Q9NX63;A0A286YEX5	C9JRZ6	MICOS complex subunit MIC19	CHCHD3	ELKRRVAEELALEQAKKESEDQKRLKQAKEL	76	NaN	20.6548	NaN	NaN	NaN	NaN	NaN	NaN	NaN	NaN	19.2813	NaN	NaN	22.1562	K	2	___1	1	0.000682176
C9JVN9;Q9H9P8-2;Q9H9P8;G3V5S1;G3V272	C9JVN9	L-2-hydroxyglutarate dehydrogenase, mitochondrial	L2HGDH	QTGHNSGVIHSGIYYKPESLKAKLCVQGAAL	104	22.4344	NaN	NaN	NaN	NaN	NaN	NaN	22.271	NaN	NaN	NaN	NaN	NaN	NaN	K	4	___1	1	4.54442e-32
C9JVN9;Q9H9P8-2;Q9H9P8;G3V5S1;G3V272	C9JVN9	L-2-hydroxyglutarate dehydrogenase, mitochondrial	L2HGDH	QNGVPGLRLIQQEDIKKKEPYCRGLMAIDCP	173	NaN	NaN	22.884	NaN	21.6344	21.7167	NaN	NaN	NaN	NaN	NaN	22.06	21.638	21.4067	K	2	___1	1	0.00208443
C9JVN9;Q9H9P8-2;Q9H9P8;G3V5S1;G3V272	C9JVN9	L-2-hydroxyglutarate dehydrogenase, mitochondrial	L2HGDH	AVEQEEIPRLQALYEKGLQNGVPGLRLIQQE	155	21.8057	23.9013	24.6109	24.6924	25.1679	23.7649	22.4393	24.1832	NaN	25.2591	25.0881	23.7499	25.0879	23.4253	K	2	___1	1	7.29897e-121
C9JZN9;P45378-4;H9KVA2;F8WA37;P45378-5;P45378-7;P45378-6;P45378-2;P45378-3;P45378;C9JCA5	C9JZN9;H9KVA2	Troponin T, fast skeletal muscle	TNNT3	KPRPKLTAPKIPEGEKVDFDDIQKKRQNKDL	34	24.8476	NaN	NaN	NaN	21.0703	NaN	NaN	23.0191	NaN	NaN	20.0371	22.8058	NaN	NaN	K	2	___1	1	4.28595e-16
C9JZN9;P45378-4;H9KVA2;F8WA37;P45378-5;P45378-7;P45378-6;P45378-2;P45378-3;P45378;C9JCA5	C9JZN9;H9KVA2	Troponin T, fast skeletal muscle	TNNT3	PKIPEGEKVDFDDIQKKRQNKDLMELQALID	42	26.8477	23.0483	23.6907	24.6862	24.7843	23.2284	23.685	27.006	21.9889	23.0397	23.9032	23.4716	23.025	24.1241	K	2	___1	1	0.00278161
C9JZN9;P45378-4;H9KVA2;F8WA37;P45378-5;P45378-7;P45378-6;P45378-2;P45378-3;P45378;C9JCA5	C9JZN9;H9KVA2	Troponin T, fast skeletal muscle	TNNT3	QVEEEAQEEEEKPRPKLTAPKIPEGEKVDFD	23	24.6506	23.6867	23.0262	25.2143	23.7602	23.8427	22.6614	24.2653	21.7353	22.7505	24.4827	23.443	23.3176	23.7634	K	3	___1	1	0.00358012
C9JZN9;P45378-4	C9JZN9	Troponin T, fast skeletal muscle	TNNT3	KYDIMNVRARVQMLAKFSKKAGTPAKGKVGG	221	NaN	NaN	24.5858	24.2705	22.8823	23.5493	23.9537	NaN	NaN	22.9066	24.4342	23.0769	24.8324	23.2142	K	2	___1	1	0.00206789
D6RAL1;Q969S9-5;Q969S9-4;Q969S9-2;Q969S9-3;Q969S9	D6RAL1	Ribosome-releasing factor 2, mitochondrial	GFM2	KPLLLQLPIGEAKTFKGVVDVVMKEKLLWNC	191	NaN	NaN	NaN	NaN	NaN	20.9007	NaN	NaN	22.3018	NaN	21.2031	22.4993	22.9943	24.9959	K	2	___1	1	0.00197992
V9GZ45;V9GYU9;V9GYP4;D6RB81;Q9UHK6-4;Q9UHK6-2;Q9UHK6;Q9UHK6-5	V9GZ45	Alpha-methylacyl-CoA racemase	AMACR	VSRLGRGKRSLVLDLKQPRGAAVLRRLCKRS	58	21.2075	NaN	20.9495	NaN	21.0037	22.6003	NaN	22.0994	NaN	22.926	NaN	NaN	23.1638	22.4478	K	2	___1	1	0.00653392
D6RF35;P02774;P02774-3;P02774-2;D6RBJ7	D6RF35	Vitamin D-binding protein	GC	YAAYGEKKSRLSNLIKLAQKVPTADLEDVLP	238	21.2077	NaN	NaN	NaN	20.4197	NaN	NaN	21.3881	NaN	NaN	NaN	NaN	NaN	NaN	K	2	___1	1	0.00100543
D6RG39;D6RIT9;Q9NX40-3;Q9NX40-2;Q9NX40-4;Q9NX40;D6RBC5;D6RDI5;D6RI08;D6RA54;D6RC55;D6RDK1;D6RIV2;D6R9T5;D6RDK6;D6RBN5	D6RG39	OCIA domain-containing protein 1	OCIAD1	ITQGLISKGILSSHPKYGSIPKLILACIMGY	72	NaN	NaN	NaN	NaN	NaN	20.4077	NaN	NaN	NaN	21.8206	19.6438	NaN	20.792	20.0122	K	2	___1	1	1.59316e-06
D6RIE3;D6RGV5;H0UI06;P14406	D6RIE3	Cytochrome c oxidase subunit 7A2, mitochondrial	COX7A2	TASRRHFKNKVPEKQKLFQEDDEIPLYLKGG	33	19.9815	NaN	NaN	NaN	NaN	NaN	NaN	20.8683	NaN	NaN	NaN	NaN	NaN	NaN	K	2	___1	1	0.000147771
D6RH20;G5EA06;Q92552;Q92552-2	D6RH20	28S ribosomal protein S27, mitochondrial	MRPS27	SKLPQYLERFKALHSKLQALGKIESEGLLSL	284	NaN	NaN	NaN	NaN	NaN	NaN	NaN	22.3884	NaN	NaN	20.4788	20.7701	20.4371	NaN	K	2	___1	1	3.4512e-08
D6RHV3;P17540;D6R998	D6RHV3;P17540	Creatine kinase S-type, mitochondrial	CKMT2	PVIKLRHNGYDPRVMKHTTDLDASKDHFLFD;PVIKLRHNGYDPRVMKHTTDLDASKITQGQF	140	20.7557	NaN	NaN	20.9774	NaN	NaN	NaN	23.0044	19.8607	NaN	NaN	21.1656	NaN	NaN	K	3	___1	1	5.80271e-05
D6RIS5;Q495G5;Q8IVH4	D6RIS5	Methylmalonic aciduria type A protein, mitochondrial	MMAA	DHTEGLSDKEQRFVDKLYTGLIQGQRACLAE	88	20.4698	NaN	NaN	NaN	NaN	NaN	NaN	20.1939	NaN	NaN	NaN	NaN	NaN	NaN	K	3	___1	1	0.000381629
E5RJG4;E5RH23;E5RGU5;E5RGP2;E5RHF8;E5RG21;E5RJH1;Q6P2R3;Q5T6A0;E5RIV2;G3V140;E5RFY4;Q8IYX8-2;Q8IYX8	E5RJG4	Centrosomal protein CEP57L1	CEP57L1;C6orf182	TTQKTAEDKIKHLEEKLKEEEHQRKLFQDKA	64	NaN	NaN	NaN	NaN	NaN	NaN	NaN	22.2113	NaN	NaN	NaN	NaN	NaN	NaN	K	3	___1	0.999999	0.00385286
E5RHG8;Q15369;Q15369-2;R4GMY8	E5RHG8	Transcription elongation factor B polypeptide 1	TCEB1	MYVKLISSDGHEFIVKREHALTSGTIKAMLS	32	NaN	NaN	NaN	NaN	21.7691	NaN	NaN	22.6893	NaN	NaN	NaN	NaN	NaN	NaN	K	3	___1	1	0.000138561
E5RIL6;E5RHI7;Q96FB5-2;Q96FB5	E5RIL6	Protein RRNAD1	RRNAD1	_MPGISARGLSHEGRKQLAVNLTRVLALYRS	15	NaN	NaN	NaN	NaN	NaN	NaN	NaN	NaN	NaN	NaN	NaN	NaN	23.4535	NaN	K	2	___1	1	0.00220917
E5RIP7;H0YBL1;P29218;P29218-3;E5RG13;E5RG94;E5RIF4;E5RHE9;E5RI82;E5RGY4;P29218-2	E5RIP7	Inositol monophosphatase 1	IMPA1	SSPVDLVTATDQKVEKMLISSIKEKYPSHSF	44	22.7175	22.5715	20.9398	24.0212	23.0665	23.4868	22.4727	23.231	21.049	22.6609	23.2957	23.0775	23.0554	24.1322	K	2	___1	1	0.000846477
E7EPM6;P33121-3;P33121;P33121-2;B7Z3Z9;H0Y9U7	E7EPM6	Long-chain-fatty-acid--CoA ligase 1	ACSL1	PELFSIDNGLLTPTMKAKRPELRNYFRSQID	641	NaN	NaN	NaN	NaN	NaN	NaN	NaN	NaN	NaN	NaN	22.2159	NaN	NaN	NaN	K	3	___1	1	5.31981e-05
E7EPM6;P33121-3;P33121;B7Z3Z9	E7EPM6	Long-chain-fatty-acid--CoA ligase 1	ACSL1	GEVCVKGPNVFQGYLKDPAKTAEALDKDGWL	487	20.8657	NaN	NaN	NaN	NaN	NaN	NaN	21.2603	NaN	NaN	NaN	NaN	21.4929	21.8057	K	2	___1	1	0.000223458
E7EPM6;P33121-3;P33121;P33121-2;B7Z3Z9;H0Y9U7	E7EPM6	Long-chain-fatty-acid--CoA ligase 1	ACSL1	PNGTLKIIDRKKHIFKLAQGEYIAPEKIENI	527	NaN	NaN	NaN	NaN	NaN	NaN	NaN	22.6411	NaN	NaN	NaN	NaN	NaN	NaN	K	3	___1	1	2.48167e-05
E7EPM6;P33121-3;P33121;P33121-2;B7Z3Z9	E7EPM6	Long-chain-fatty-acid--CoA ligase 1	ACSL1	NRMFDRIFGQANTTLKRWLLDFASKRKEAEL	352	NaN	NaN	NaN	NaN	21.9467	NaN	20.7826	21.6838	NaN	NaN	NaN	20.8185	21.7786	20.6257	K	2	___1	1	1.80538e-07
E7EPT4;P19404	E7EPT4	NADH dehydrogenase [ubiquinone] flavoprotein 2, mitochondrial	NDUFV2	EDLTAKDIEEIIDELKAGKIPKPGPRSGRFS	212	22.1602	NaN	NaN	NaN	NaN	NaN	NaN	22.557	NaN	25.6652	25.4121	23.4946	21.1004	21.1104	K	2	___1	1	1.90445e-20
E7EPT4;P19404	E7EPT4	NADH dehydrogenase [ubiquinone] flavoprotein 2, mitochondrial	NDUFV2	ENNPDTPFDFTPENYKRIEAIVKNYPEGHKA	64	26.0255	NaN	NaN	23.0617	23.1541	24.0763	NaN	25.7439	NaN	26.2976	24.5421	24.5205	23.2388	23.0294	K	2	___1	1	5.53372e-207
E7EPT4;P19404	E7EPT4	NADH dehydrogenase [ubiquinone] flavoprotein 2, mitochondrial	NDUFV2	PCMLRNSDSILEAIQKKLGIKVGETTPDKLF	157	22.239	21.8439	22.9869	23.1723	24.8051	24.5162	23.449	25.8091	23.0241	25.6169	24.2582	25.1383	24.9959	23.6222	K	2	___1	1	8.41219e-39
H7C1W2;H0Y5Q7;E9PF84;G5E9Q7;E7EQB8;P51553-2;P51553	H7C1W2	Isocitrate dehydrogenase [NAD] subunit, mitochondrial;Isocitrate dehydrogenase [NAD] subunit gamma, mitochondrial	IDH3G	IITKAKSLRIAEYAFKLAQESGRKKVTAVHK	146	NaN	NaN	NaN	NaN	NaN	NaN	NaN	22.6185	NaN	24.8078	21.2225	NaN	NaN	NaN	K	2	___1	1	5.48119e-21
E7EQR4;P15311;P35241;P35241-5;E9PQ82;E9PNV3;P35241-3	E7EQR4;P35241	Ezrin;Radixin	EZR;RDX	KVSAQEVRKENPLQFKFRAKFYPEDVAEELI;KVTQQDVKKENPLQFKFRAKFFPEDVSEELI	79	22.474	NaN	NaN	NaN	22.461	23.2325	22.2968	23.2351	NaN	23.3691	24.2294	NaN	23.181	23.0182	K	2	___1	1	0.00142409
E7EU05;P16671-3;P16671;E9PLT1;P16671-4	E7EU05	Platelet glycoprotein 4	CD36	FAKRLQVNLLVKPSEKIQVLKNLKRNYIVPI	398	20.815	NaN	NaN	NaN	NaN	NaN	NaN	21.7585	NaN	NaN	NaN	NaN	NaN	NaN	K	2	___1	1	0.000962446
E7EVA0;P27816-6;P27816;P27816-2;P27816-4;P27816-5;H7C4C5;H0Y2V1;F8W9U4	E7EVA0;H0Y2V1	Microtubule-associated protein;Microtubule-associated protein 4	MAP4	IKHKPGGGDVKIESQKLNFKEKAQAKVGSLD	2205	NaN	NaN	20.5371	22.0368	21.657	NaN	NaN	NaN	20.2581	NaN	22.045	20.845	21.3099	21.8882	K	2	___1	1	0.00169561
E7EVA0	E7EVA0	Microtubule-associated protein	MAP4	EYKPQPAPHLKTPVDKSQSVGPLNLKGPLAE	932	NaN	NaN	NaN	NaN	NaN	NaN	NaN	NaN	NaN	NaN	NaN	20.3791	NaN	NaN	K	2	___1	1	2.94614e-09
E7EWM1;Q15596	E7EWM1	Nuclear receptor coactivator 2	NCOA2	KLERLDSKTDPASNTKLIAMKTEKEEMSFEP	780	NaN	NaN	NaN	NaN	NaN	NaN	NaN	NaN	NaN	NaN	21.448	21.1871	20.4165	21.8972	K	2	___1	1	0.00141393
E9PF16;Q96CM8-3;Q96CM8;Q96CM8-2;Q96CM8-4	E9PF16	Acyl-CoA synthetase family member 2, mitochondrial	ACSF2	LKKVGCKALVFPKQFKTQQYYNVLKQICPEV	139	NaN	NaN	NaN	NaN	NaN	NaN	NaN	21.9729	NaN	NaN	NaN	NaN	NaN	NaN	K	2	___1	1	0.00152573
E9PF16;Q96CM8-3;Q96CM8;Q96CM8-2;Q96CM8-4	E9PF16	Acyl-CoA synthetase family member 2, mitochondrial	ACSF2	VNNSNILGERLKLHEKTPEQLRMILPNPLYH	253	25.0305	24.8361	25.5587	24.8841	25.289	26.3857	25.3233	27.7233	22.5052	27.1641	25.7482	21.1971	25.7983	25.6372	K	3	___1	1	0.00014835
G5E9X5;F5GYT8;E9PG35;E9PHF7;Q96RQ3	G5E9X5	Methylcrotonoyl-CoA carboxylase subunit alpha, mitochondrial	MCCC1	RRHQKIIEEAPAPGIKSEVRKKLGEAAVRAA	257	NaN	21.9884	NaN	21.1733	22.7047	21.907	21.5536	NaN	23.0094	21.8379	21.1565	20.2125	22.3702	22.5669	K	2	___1	1	0.000123514
E9PH64;Q9Y6M9;E7EWZ0;E9PF49	E9PH64	NADH dehydrogenase [ubiquinone] 1 beta subcomplex subunit 9	NDUFB9	DWHPSEKAMYPDYFAKREQWKKLRRESWERE	110	25.4949	23.4699	24.3721	23.5322	25.3291	25.3588	24.6381	26.1705	24.3689	26.9984	25.0026	24.8892	25.8857	25.6635	K	2	___1	1	0.000218161
E9PHG3;Q8NB12	E9PHG3	Histone-lysine N-methyltransferase SMYD1	SMYD1	KIDKARSEGLYHEVVKLCRECLEKQEPVFAD	317	21.7195	NaN	NaN	NaN	NaN	NaN	NaN	21.876	NaN	NaN	NaN	NaN	NaN	NaN	K	3	___1	1	0.000141705
E9PL10;Q96K17;E9PPC3;Q96K17-3;P20290-2;P20290;D6RDG3	E9PL10;P20290-2	Transcription factor BTF3;Transcription factor BTF3 homolog 4	BTF3L4;BTF3	________MNQEKLAKLQAQVRIGGKGTARR;___MKETIMNQEKLAKLQAQVRIGGKGTARR	8	NaN	NaN	NaN	NaN	NaN	NaN	NaN	NaN	NaN	NaN	NaN	21.7363	21.2346	20.9771	K	2	___1	1	0.00220721
E9PLK3;P55786;A6NEC2;P55786-2;A6NEC2-2	E9PLK3;P55786-2	Puromycin-sensitive aminopeptidase;Puromycin-sensitive aminopeptidase-like protein	NPEPPS;NPEPPSL1	VCVRVYTPVGKAEQGKFALEVAAKTLPFYKD	275	22.322	NaN	20.395	22.5027	23.4316	23.5001	21.7772	21.9899	21.3346	20.589	22.8848	21.3696	21.9484	23.3586	K	2	___1	1	0.000425517
E9PLK3;P55786;P55786-2	E9PLK3;P55786-2	Puromycin-sensitive aminopeptidase	NPEPPS	TSEDPNQAKLKILMDKPEMNVVLKNVKPDQW	559	21.3757	NaN	22.1016	23.6089	23.3016	23.8341	22.7222	23.1659	21.835	22.0328	23.3133	21.8465	22.757	23.927	K	2	___1	1	4.05609e-05
E9PLK3;P55786;A6NEC2;E9PP11;P55786-2	E9PLK3;P55786-2	Puromycin-sensitive aminopeptidase;Puromycin-sensitive aminopeptidase-like protein	NPEPPS;NPEPPSL1	FVGELNDKMKGFYRSKYTTPSGEVRYAAVTQ	159	NaN	NaN	21.9998	23.4433	22.8844	23.3283	22.5503	23.869	22.0816	22.1932	23.4386	22.2553	22.4595	21.8292	K	2	___1	1	0.000184184
E9PMG2	E9PMG2		PPT1	VIWHGMGERQLLQSLKHGCY___________	51	NaN	21.0996	NaN	NaN	21.541	NaN	NaN	NaN	21.8758	NaN	20.9352	22.0619	22.0908	NaN	K	2	___1	1	0.00836549
E9PN17;O75964;Q7Z4Y8	E9PN17	ATP synthase subunit g, mitochondrial;ATP synthase subunit g 2, mitochondrial	ATP5L;ATP5L2	VPPTPAEIPRAIQSLKKIVNSAQTGSFKQLT	54	30.1906	NaN	NaN	NaN	NaN	29.8908	NaN	31.4234	28.3694	25.9923	25.9694	NaN	29.6169	29.995	K	3	___1	1	6.61906e-133
E9PN17;O75964	E9PN17	ATP synthase subunit g, mitochondrial	ATP5L	QSLKKIVNSAQTGSFKQLTVKKKSST_____	66	24.6632	24.5427	24.1942	24.5823	25.555	25.7058	21.7248	25.6257	24.1664	26.2347	25.0541	23.0897	25.6448	26.7148	K	2	___1	1	2.00418e-96
E9PN17;O75964	E9PN17	ATP synthase subunit g, mitochondrial	ATP5L	_____MAQFVRNLVEKTPALVNAAVTYSKPR	11	20.5319	NaN	NaN	NaN	NaN	NaN	NaN	21.695	NaN	NaN	NaN	NaN	NaN	NaN	K	3	___1	1	1.43012e-11
E9PN17;O75964	E9PN17	ATP synthase subunit g, mitochondrial	ATP5L	VEKTPALVNAAVTYSKPRLATFWYYAKVELV	24	25.2231	24.5147	24.6475	24.1627	26.9802	26.103	25.9035	26.453	23.8375	25.9346	24.7117	25.0573	25.8272	25.1333	K	2	___1	1	4.49955e-75
E9PNP3;Q9H7C9;E9PR47;E9PJP1;E9PLK9;K4DI89;Q9H7C9-3;Q9H7C9-2	E9PNP3	Mth938 domain-containing protein	AAMDC	HSPGVQPADVKEVVEKGVQTLVIGRGMSEAL	79	20.6503	22.2217	21.9748	23.0662	NaN	21.9514	21.7193	21.7873	NaN	NaN	22.433	24.4049	23.0099	23.4424	K	2	___1	1	2.6312e-67
E9PNP3;Q9H7C9;E9PR47;E9PIQ4	E9PNP3	Mth938 domain-containing protein	AAMDC	MSEALKVPSSTVEYLKKHGIDVRVLQTEQAV	105	23.2977	NaN	22.4268	24.1575	24.265	24.0918	23.7369	24.3331	21.7166	22.2887	23.9143	21.2726	23.8108	23.9384	K	2	___1	1	1.24955e-07
E9PPW7;O00217;E9PKH6;E9PN51;F8W9K7;H0YDT4	E9PPW7	NADH dehydrogenase [ubiquinone] iron-sulfur protein 8, mitochondrial	NDUFS8	SYLFREPATINYPFEKGPLSPRFRGEHALRR	88	22.1023	NaN	NaN	NaN	NaN	NaN	NaN	22.6318	NaN	NaN	NaN	NaN	NaN	NaN	K	2	___1	1	3.81174e-06
E9PR30;P62861	E9PR30	40S ribosomal protein S30	FAU	MQYNRRFVNVVPTFGKKKGPNANS_______	90	22.1246	NaN	24.328	26.0135	24.9109	24.2331	24.7742	23.3163	NaN	24.5408	25.426	22.2495	25.1818	25.1675	K	2	___1	1	0.000313479
E9PRK2;Q96I59-2;Q96I59	E9PRK2	Probable asparagine--tRNA ligase, mitochondrial	NARS2	LFQLEWGADLRTEHEKYLVKHCGNIPVFVIN	209	NaN	NaN	NaN	NaN	NaN	NaN	NaN	NaN	21.5749	19.8085	19.6499	NaN	21.0182	20.9496	K	2	___1	1	0.00647193
F2Z337;P02144;B0QYF8;F2Z2F1;Q8WVH6	F2Z337;P02144	Myoglobin	MB	KHLKSEDEMKASEDLKKHGATVLTALGGIL_;KHLKSEDEMKASEDLKKHGATVLTALGGILK	63	31.7041	29.4786	29.583	29.9317	27.8949	29.4597	28.4374	31.5142	28.1832	28.9636	28.5659	NaN	29.5654	30.0956	K	2	___1	1	0.000604707
F2Z337;P02144;B0QYF8;F2Z2F1	F2Z337;P02144	Myoglobin	MB	GHPETLEKFDKFKHLKSEDEMKASEDLKKHG	51	28.0862	26.0132	25.8437	26.7742	25.6379	25.8715	25.1782	28.5562	24.943	25.5335	26.4148	26.7729	26.8818	27.5256	K	2	___1	1	2.88837e-08
F2Z337;P02144;B0QYF8;F2Z2F1	F2Z337;P02144	Myoglobin	MB	EVLIRLFKGHPETLEKFDKFKHLKSEDEMKA	43	33.6491	29.579	30.2702	30.8687	31.3541	31.0064	30.2393	34.0391	29.0478	31.7056	31.6645	30.8984	30.5013	31.2882	K	3	___1	1	1.31335e-07
F2Z337;P02144;B0QYF8;F2Z2F1	F2Z337;P02144	Myoglobin	MB	EKFDKFKHLKSEDEMKASEDLKKHGATVLTA	57	30.3364	29.7954	29.4429	30.5605	29.3253	30.0783	29.4354	30.6311	27.3719	28.89	29.7897	30.3127	29.0016	29.3179	K	2	___1	1	2.07069e-19
F2Z337;P02144;B0QYF8;F2Z2F1	F2Z337;P02144	Myoglobin	MB	ADIPGHGQEVLIRLFKGHPETLEKFDKFKHL	35	25.0257	NaN	19.849	22.3461	22.433	21.5221	NaN	24.7451	22.8504	22.9817	23.7287	23.5009	21.66	23.5491	K	3	___1	1	4.14566e-13
F2Z3L7;Q9BS92	F2Z3L7	Protein NipSnap homolog 3B	NIPSNAP3B	YYLKPSNMNAFMENLKKNIHLRTSYSELVGF	57	22.1616	24.9087	24.3943	24.2132	23.0523	26.3798	23.6821	24.7195	22.5816	25.4905	25.5892	24.2723	26.0227	25.1195	K	2	___1	1	8.99251e-45
F5H5A1;Q4G176;F5H362;F5H755	F5H5A1	Acyl-CoA synthetase family member 3, mitochondrial	ACSF3	EGDERGTKVTPGFEEKEGELLVRGPSVFREY	156	NaN	NaN	NaN	NaN	NaN	NaN	NaN	NaN	NaN	23.8083	NaN	NaN	22.5236	NaN	K	2	___1	1	0.000393403
F6WQW2;P43487-2;P43487;C9JXG8;C9JGV6	F6WQW2	Ran-specific GTPase-activating protein	RANBP1	PELLAIRFLNAENAQKFKTKFEECRKEIEER	227	21.6674	NaN	19.9887	20.9601	21.7292	19.509	NaN	21.3021	NaN	NaN	20.8667	NaN	20.4419	20.8407	K	2	___1	1	0.000621867
F8VU11;Q6NWY9-2;Q6NWY9-3;Q6NWY9	F8VU11	Pre-mRNA-processing factor 40 homolog B	PRPF40B	RWTRPKDLDDLEVLVKQEAAGKQQQQLPQTL	197	27.3554	NaN	NaN	NaN	NaN	NaN	NaN	25.8501	NaN	NaN	NaN	NaN	NaN	NaN	K	2	___1	1	0.00149723
F8VZQ9;P82979;F8VS12	F8VZQ9	SAP domain-containing ribonucleoprotein	SARNP	______MATETVELHKLKLAELKQECLARGL	10	NaN	NaN	NaN	NaN	20.2444	NaN	NaN	NaN	NaN	NaN	NaN	NaN	NaN	NaN	K	2	___1	1	0.00181924
F8W1A4;P54819-2;P54819;P54819-6;P54819-5;F8VY04	F8W1A4	Adenylate kinase 2, mitochondrial;Adenylate kinase 2, mitochondrial;Adenylate kinase 2, mitochondrial, N-terminally processed	AK2	DITGEPLIRRSDDNEKALKIRLQAYHTQTTP	181	23.3776	NaN	NaN	NaN	NaN	NaN	NaN	22.6207	NaN	NaN	NaN	NaN	NaN	NaN	K	2	___1	1	0.000369824
F8W1R7;G3V1V0;P60660-2;P60660;J3KND3;G8JLA2;B7Z6Z4;F8VPF3;P14649;F8W1I5	F8W1R7;P14649	Myosin light polypeptide 6;Myosin light chain 6B	MYL6;MYL6B	VMRALGQNPTNAEVLKVLGNPKSDELKSRRV;VMRALGQNPTNAEVLKVLGNPKSDEMNVKVL	107	21.2231	NaN	NaN	25.9118	26.0322	24.9219	22.657	21.6718	NaN	23.4588	24.2483	NaN	NaN	NaN	K	3	___1	1	1.59577e-148
F8W7Q4;Q96A26	F8W7Q4	Protein FAM162A	FAM162A	KAAQRHETLTSLNLEKKARLKEEAAMKAKTE	129	22.9548	NaN	NaN	NaN	NaN	NaN	NaN	23.6924	21.1939	22.1776	20.6732	NaN	NaN	21.9892	K	3	___1	1	7.2418e-07
F8W914;Q9NQC3-2;Q9NQC3-5;Q9NQC3;Q9NQC3-3;Q9NQC3-4;Q9NQC3-6;A0A0U1RQR6	F8W914	Reticulon;Reticulon-4	RTN4	HYLGLANKNVKDAMAKIQAKIPGLKRKAE__	332	22.3207	21.4974	20.9533	22.4454	NaN	20.4561	NaN	22.4949	18.7311	20.4038	21.9831	NaN	21.4734	21.9456	K	2	___1	1	0.000982214
F8W914;Q9NQC3-2;Q9NQC3-5;Q9NQC3;Q9NQC3-3;Q9NQC3-4;Q9NQC3-6;A0A0U1RQR6;H7C106	F8W914	Reticulon;Reticulon-4	RTN4	QKYSNSALGHVNCTIKELRRLFLVDDLVDSL	257	NaN	NaN	NaN	NaN	NaN	NaN	NaN	24.1734	NaN	NaN	NaN	NaN	NaN	NaN	K	3	___1	1	2.10336e-07
G3V0I5;P49821-2;P49821;B4DE93	G3V0I5	NADH dehydrogenase [ubiquinone] flavoprotein 1, mitochondrial	NDUFV1	GTAAVIVMDRSTDIVKAIARLIEFYKHESCG	358	24.1388	NaN	23.7852	24.6776	25.3574	21.5709	22.0173	22.2821	22.7657	24.3564	24.4779	25.5206	24.9539	25.3885	K	2	___1	1	0.000271993
G3V0I5;P49821-2;P49821;E9PMX3;E9PPS5	G3V0I5	NADH dehydrogenase [ubiquinone] flavoprotein 1, mitochondrial	NDUFV1	ARVSTAPKKTSFGSLKDEDRIFTNLYGRHDW	29	26.7582	23.6024	25.9734	25.5628	27.213	27.0551	26.2532	27.5943	24.7026	27.3669	25.9968	25.0161	26.4162	26.5309	K	2	___1	1	7.29235e-08
G3V1N2;P69905	G3V1N2;P69905	Hemoglobin subunit alpha	HBA2;HBA1	SLDKFLASVSTVLTSKYR_____________	140	24.7021	25.5606	26.7148	26.469	24.8383	25.9713	23.8143	24.2835	24.018	26.574	27.191	26.631	27.5196	24.6964	K	2	___1	1	7.04479e-68
G3V1N2;P69905	G3V1N2;P69905	Hemoglobin subunit alpha	HBA2;HBA1	TYFPHFDLSHGSAQVKGHGKKVADALTNAVA	57	26.7003	NaN	NaN	NaN	NaN	NaN	NaN	26.0375	NaN	NaN	NaN	NaN	NaN	NaN	K	4	___1	1	4.95486e-43
G3V1N2;P69905	G3V1N2;P69905	Hemoglobin subunit alpha	HBA2;HBA1	DMPNALSALSDLHAHKLRVDPVNFKLLSHCL	91	27.9111	NaN	NaN	NaN	NaN	NaN	NaN	25.3057	NaN	NaN	NaN	NaN	NaN	NaN	K	4	___1	1	2.22372e-113
H7C5L9;G5E9W7;G5E9V5;P82650	H7C5L9	28S ribosomal protein S22, mitochondrial	MRPS22	YFPKEGRKILTPIIFKEENLRFEPDSTEYIK	58	NaN	NaN	NaN	NaN	NaN	NaN	NaN	22.1534	NaN	23.4467	NaN	NaN	21.5373	NaN	K	2	___1	1	4.33053e-07
H7C3D3;H0Y2Y8;Q15942-2;Q15942	H7C3D3	Zyxin	ZYX	ASSPAPAPKFSPVTPKFTPVASKFSPGAPGG	89	NaN	22.3986	NaN	NaN	22.8295	NaN	21.5787	NaN	NaN	NaN	22.921	22.9116	23.0183	23.4178	K	2	___1	1	0.000487385
H0Y5L2;Q9NTX5-6;Q9NTX5-2;Q9NTX5;H0YCS9;Q9NTX5-3	H0Y5L2	Ethylmalonyl-CoA decarboxylase	ECHDC1	IIGSRQALKVLSGALKLDSKNALNIGMVEEV	225	25.8633	NaN	23.7236	24.3224	25.0826	25.6343	25.2446	25.9464	22.1114	26.8369	25.0971	23.9415	25.847	25.714	K	2	___1	1	0.000508313
H0Y7P0	H0Y7P0		TRPM8	DTSEEMRHRFRQLDTKIILRNADEQFCYRLL	349	NaN	NaN	NaN	NaN	NaN	NaN	NaN	NaN	NaN	23.5933	NaN	NaN	NaN	NaN	K	2	___1	1	0.00696805
H0Y8Z9;Q9H845	H0Y8Z9	Acyl-CoA dehydrogenase family member 9, mitochondrial	ACAD9	NLDEQIKKVSQQILEKRAYICAHPLDRTC__	371	NaN	NaN	21.5488	NaN	21.7899	21.8639	19.6984	NaN	NaN	21.9234	NaN	NaN	NaN	20.5009	K	2	___1	1	0.000948827
H0YDD4;P10515;E9PEJ4	H0YDD4	Acetyltransferase component of pyruvate dehydrogenase complex;Dihydrolipoyllysine-residue acetyltransferase component of pyruvate dehydrogenase complex, mitochondrial	DLAT	DVNMGEVLLVRKELNKILEGRSKISVNDFII	298	NaN	NaN	NaN	19.4334	NaN	20.404	NaN	NaN	22.3282	NaN	NaN	NaN	NaN	21.7128	K	2	___1	1	5.4125e-09
H0YDD4;P10515;E9PEJ4	H0YDD4	Acetyltransferase component of pyruvate dehydrogenase complex;Dihydrolipoyllysine-residue acetyltransferase component of pyruvate dehydrogenase complex, mitochondrial	DLAT	GRVFVSPLAKKLAVEKGIDLTQVKGTGPDGR	200	25.6426	23.8522	26.0453	26.3281	28.6445	26.6476	26.5245	24.5603	27.0795	26.2325	26.91	26.955	26.181	27.1994	K	2	___1	1	5.28259e-44
H0YDD4;P10515;E9PEJ4	H0YDD4	Acetyltransferase component of pyruvate dehydrogenase complex;Dihydrolipoyllysine-residue acetyltransferase component of pyruvate dehydrogenase complex, mitochondrial	DLAT	LLVRKELNKILEGRSKISVNDFIIKASALAC	305	NaN	NaN	NaN	23.8464	21.3914	23.3518	NaN	NaN	23.6999	NaN	NaN	NaN	23.5831	24.6801	K	2	___1	1	1.79683e-06
H0YDD4;P10515;E9PEJ4	H0YDD4	Acetyltransferase component of pyruvate dehydrogenase complex;Dihydrolipoyllysine-residue acetyltransferase component of pyruvate dehydrogenase complex, mitochondrial	DLAT	TPAGPKGRVFVSPLAKKLAVEKGIDLTQVKG	194	26.564	NaN	24.7788	25.7404	26.4351	NaN	25.8004	26.0154	24.3782	24.3535	25.2668	26.0731	24.8105	26.4261	K	2	___1	1	0.00401396
H0YDD4;P10515;E9PEJ4	H0YDD4	Acetyltransferase component of pyruvate dehydrogenase complex;Dihydrolipoyllysine-residue acetyltransferase component of pyruvate dehydrogenase complex, mitochondrial	DLAT	AVGAQWLAEFRKYLEKPITMLL_________	473	21.6616	NaN	NaN	NaN	NaN	NaN	NaN	23.0819	NaN	NaN	NaN	NaN	NaN	NaN	K	2	___1	1	0.00733059
H0YEC9;Q8IWG1-2;Q8IWG1	H0YEC9	WD repeat-containing protein 63	WDR63	KIREQEKKEMELEMAKKKVVS__________	123	29.2228	NaN	NaN	NaN	NaN	NaN	NaN	26.6449	NaN	22.9485	NaN	NaN	NaN	22.145	K	2	___1	1	0.00149677
H0YHF1;Q96MF6-3;Q96MF6-2;Q96MF6;H0YHW3	H0YHF1	Coenzyme Q-binding protein COQ10 homolog A, mitochondrial	COQ10A	VVKQNVAAFERRAATKFGPETAIPRELMFHE	134	NaN	NaN	NaN	NaN	NaN	NaN	NaN	25.2114	23.6043	NaN	NaN	NaN	NaN	NaN	K	2	___1	1	0.000225278
H0YK48;P09493-5;P09493;H0YL52;H0YL80;P09493-4;P09493-10;H0YKX5;H0YL42;H0YK20;P09493-6;H0YNC7;P09493-9;Q6ZN40	H0YK48;P09493;P09493-4;P09493-6;P09493-9;Q6ZN40	Tropomyosin alpha-1 chain	TPM1	RGMKVIESRAQKDEEKMEIQEIQLKEAKHIA	140	22.1865	NaN	NaN	21.9794	21.3867	NaN	NaN	24.3635	NaN	NaN	NaN	22.4396	NaN	NaN	K	3	___1	0.92987	8.08918e-07
H0YK48;P09493-5;P09493;H0YL52;P09493-6;H0YNC7;P09493-9;Q6ZN40	H0YK48;P09493;P09493-6;P09493-9;Q6ZN40	Tropomyosin alpha-1 chain	TPM1	AELSEGKCAELEEELKTVTNNLKSLEAQAEK	198	NaN	NaN	NaN	NaN	NaN	NaN	NaN	22.5016	NaN	NaN	23.5141	23.3253	22.9403	NaN	K	2	___1	1	9.6652e-53
H0YK48;P09493-5;P09493;H0YL52;P09493-6;H0YNC7;P09493-9;Q6ZN40	H0YK48;P09493;P09493-6;P09493-9;Q6ZN40	Tropomyosin alpha-1 chain	TPM1	CAELEEELKTVTNNLKSLEAQAEKYSQKEDR	205	23.7274	NaN	21.396	24.0158	24.0875	23.0275	22.3573	24.255	22.929	22.3041	22.7231	23.5917	21.2785	24.2439	K	2	___1	1	2.58052e-153
H0YK48;P09493-5;P09493;H0YL52;P09493-4;P09493-10;H0YL42;P09493-6;H0YNC7;P09493-9;Q6ZN40	H0YK48;P09493;P09493-4;P09493-6;P09493-9;Q6ZN40	Tropomyosin alpha-1 chain	TPM1	AEKYSQKEDRYEEEIKVLSDKLKEAETRAEF;EDKYSQKEDRYEEEIKVLSDKLKEAETRAEF	226	NaN	NaN	NaN	21.9189	22.3822	NaN	NaN	22.35	NaN	NaN	NaN	21.7867	20.3169	NaN	K	2	___1	1	5.48947e-07
H0YK48;P09493-5;P09493;H0YL52;P09493-4;P09493-10;H0YKX5;H0YL42;H0YK20;P09493-6;H0YNC7;P09493-9;Q6ZN40	H0YK48;P09493;P09493-4;P09493-6;P09493-9;Q6ZN40	Tropomyosin alpha-1 chain	TPM1	IQLKEAKHIAEDADRKYEEVARKLVIIESDL	161	25.2212	NaN	NaN	NaN	NaN	NaN	NaN	23.5262	NaN	NaN	NaN	NaN	NaN	NaN	K	3	___1	1	7.4575e-05
H0YK48;P09493-5;P09493;H0YL52;P09493-4;P09493-10;P09493-6;H0YNC7	H0YK48;P09493;P09493-4;P09493-6	Tropomyosin alpha-1 chain	TPM1	ETRAEFAERSVTKLEKSIDDLEDELYAQKLK	251	27.8003	25.0868	24.478	25.1721	25.6726	24.7176	21.6373	26.0878	NaN	26.4315	25.9649	25.5586	24.1397	25.0182	K	2	___1	1	5.41978e-255
H0YK48;P09493;H0YL52;P09493-4;P09493-10;P09493-6;H0YNC7	H0YK48;P09493;P09493-4;P09493-6	Tropomyosin alpha-1 chain	TPM1	LEKSIDDLEDELYAQKLKYKAISEELDHALN	264	25.5797	24.7488	23.7833	25.6706	25.416	24.3775	22.2041	25.9821	NaN	26.1426	26.2101	25.9882	24.299	25.2986	K	2	___1	1	0
H0YK48;P09493-5;P09493;H0YL52;P09493-6;H0YNC7;P09493-9;Q6ZN40	H0YK48;P09493;P09493-6;P09493-9;Q6ZN40	Tropomyosin alpha-1 chain	TPM1	KTVTNNLKSLEAQAEKYSQKEDRYEEEIKVL	213	30.1827	31.1421	30.2502	31.437	30.5486	31.0185	28.813	31.2527	29.2373	30.6906	31.3644	30.844	29.8427	31.1388	K	2	___1	1	9.24518e-49
H0YNP9;H0YKT9;Q8N4P3-2;Q8N4P3	H0YNP9	Guanosine-3',5'-bis(diphosphate) 3'-pyrophosphohydrolase MESH1	HDDC3	APHSSPGAKLVKLADKLYNLRDLNRCTPEGT	123	NaN	NaN	NaN	NaN	NaN	NaN	NaN	21.1389	NaN	20.8948	NaN	NaN	20.4503	20.4719	K	2	___1	1	0.00281543
H0YL11;P48735;P48735-2	H0YL11;P48735	Isocitrate dehydrogenase [NADP], mitochondrial	IDH2	KYKATDFVADRAGTFKMVFTPKDGSGVKEWE;QYKATDFVADRAGTFKMVFTPKDGSGVKEWE	193	31.7408	28.0933	31.2632	31.115	32.0625	32.2052	31.3767	32.2078	29.2127	33.4195	30.7449	31.5038	32.7545	32.3975	K	2	___1	1	2.63545e-71
H0YL11;P48735;P48735-2	H0YL11;P48735	Isocitrate dehydrogenase [NADP], mitochondrial	IDH2	FVADRAGTFKMVFTPKDGSGVKEWEVYNFPA	199	28.3378	27.0665	28.1249	26.7537	27.5709	28.3054	27.4394	28.8283	27.95	29.1485	27.8401	28.6438	29.0177	28.4596	K	2	___1	1	2.63545e-71
H0YL11;P48735;P48735-2	H0YL11;P48735	Isocitrate dehydrogenase [NADP], mitochondrial	IDH2	AYDGRFKDIFQEIFDKHYKTDFDKNKIWYEH	272	29.5009	NaN	NaN	NaN	22.4657	NaN	NaN	28.6168	NaN	25.2395	25.9426	24.1238	23.7783	24.1507	K	3	___1	1	2.17759e-12
H0YL11;P48735;P48735-2	H0YL11;P48735	Isocitrate dehydrogenase [NADP], mitochondrial	IDH2	GRFKDIFQEIFDKHYKTDFDKNKIWYEHRLI	275	27.157	22.4252	23.4946	21.6874	27.1587	26.7074	25.9217	30.0982	25.1073	27.6703	25.3023	24.6735	25.9875	25.9412	K	2	___1	1	3.23725e-113
H0YL11;P48735;P48735-2	H0YL11;P48735	Isocitrate dehydrogenase [NADP], mitochondrial	IDH2	MSTKNTILKAYDGRFKDIFQEIFDKHYKTDF	263	21.6913	NaN	NaN	NaN	NaN	NaN	NaN	22.3274	NaN	23.0269	21.8235	NaN	NaN	NaN	K	2	___1	1	0.00109252
H0YL11;P48735;P48735-2	H0YL11;P48735	Isocitrate dehydrogenase [NADP], mitochondrial	IDH2	IFQEIFDKHYKTDFDKNKIWYEHRLIDDMVA	280	22.2836	NaN	NaN	NaN	NaN	NaN	NaN	26.2239	24.0009	NaN	NaN	23.4237	NaN	NaN	K	2	___1	1	3.23725e-113
H0YL11;P48735;P48735-2	H0YL11;P48735	Isocitrate dehydrogenase [NADP], mitochondrial	IDH2	LNEHFLNTTDFLDTIKSNLDRALGRQ_____	442	NaN	NaN	NaN	NaN	NaN	NaN	NaN	21.4098	NaN	NaN	25.5149	22.6615	NaN	NaN	K	3	___1	1	6.08322e-80
H0YL11;P48735;P48735-2	H0YL11;P48735	Isocitrate dehydrogenase [NADP], mitochondrial	IDH2	QKKWPLYMSTKNTILKAYDGRFKDIFQEIFD	256	26.9998	25.1435	25.4606	25.186	26.6425	26.7234	23.2048	27.6952	26.4587	25.191	26.0067	26.5815	27.2187	26.4909	K	2	___1	1	0.000622082
H3BLU7;O43488;Q8NHP1;H7C5H7	H3BLU7	Aflatoxin B1 aldehyde reductase member 2;Aflatoxin B1 aldehyde reductase member 4	AKR7A2;AKR7L	SLKPDSVRSQLETSLKRLQCPQVDLFYLHAP	118	25.0567	26.6765	25.7527	25.3246	24.9936	25.8246	25.3792	25.9275	24.2217	26.6812	25.3996	23.7735	26.467	25.9415	K	2	___1	1	0.000163067
H3BP28;Q99807;Q99807-2	H3BP28	5-demethoxyubiquinone hydroxylase, mitochondrial	COQ7	MEEDPEKYEELLQLIKKFRDEELEHHDIGLD	149	21.2327	NaN	NaN	NaN	NaN	NaN	NaN	22.2096	NaN	24.5452	23.3189	NaN	22.1842	21.2984	K	2	___1	1	0.000117482
H3BTL2;H3BS02;O14874-2;O14874-3;O14874	H3BTL2	[3-methyl-2-oxobutanoate dehydrogenase [lipoamide]] kinase, mitochondrial	BCKDK	LAEGLRESRKHIEDEKLVRYFLDKTLTSRLG	175	NaN	NaN	NaN	NaN	NaN	NaN	NaN	21.6355	NaN	NaN	NaN	NaN	NaN	NaN	K	2	___1	1	0.00366015
H3BTL2;H3BS02;O14874-2;O14874-3;O14874;H3BNP3	H3BTL2	[3-methyl-2-oxobutanoate dehydrogenase [lipoamide]] kinase, mitochondrial	BCKDK	VTSFYNQSAIDAAAEKPSVRLTPTMMLYAGR	65	NaN	NaN	NaN	NaN	NaN	NaN	NaN	21.1817	NaN	NaN	NaN	NaN	NaN	NaN	K	3	___1	1	3.04529e-17
H7BY37;Q8NEZ4-2;Q8NEZ4;Q8NEZ4-3;H0Y765	H7BY37	Histone-lysine N-methyltransferase 2C	KMT2C	GSGVRKSFKDLTLLNKDSRESTKRVEKDIVF	1783	NaN	NaN	NaN	NaN	NaN	NaN	NaN	NaN	NaN	NaN	NaN	20.3562	NaN	NaN	K	2	___1	1	0.00339529
H7BY37;Q8NEZ4-2;Q8NEZ4;Q8NEZ4-3	H7BY37	Histone-lysine N-methyltransferase 2C	KMT2C	PKKKEQENKTLVLSDKHSPQKKSTVTNEVKT	315	NaN	NaN	NaN	20.8541	NaN	NaN	NaN	NaN	NaN	NaN	NaN	20.2053	NaN	NaN	K	3	___1	1	7.66119e-05
H7BZ29;Q9HD23-3;Q9HD23-2;Q9HD23;Q9HD23-4	H7BZ29	Magnesium transporter MRS2 homolog, mitochondrial	MRS2	SQATLASVAPVFTVTKFDKQGNVTSFERKKT	42	21.7874	NaN	23.0335	NaN	NaN	24.8302	NaN	23.1184	NaN	23.7977	NaN	22.7887	23.5347	22.5784	K	3	___1	1	8.42555e-41
H7BZS7;Q96PE7	H7BZS7	Methylmalonyl-CoA epimerase, mitochondrial	MCEE	LGRLNHVAIAVPDLEKAAAFYKNILGAQVDN	16	23.5465	NaN	NaN	NaN	NaN	NaN	NaN	23.1255	NaN	NaN	NaN	NaN	NaN	NaN	K	3	___1	1	4.27406e-12
H7BZS7;Q96PE7	H7BZS7	Methylmalonyl-CoA epimerase, mitochondrial	MCEE	MDLKKKKIRSLSEEVKIGAHGKPVIFLHPKD	52	NaN	NaN	23.1234	NaN	NaN	23.7228	NaN	23.8473	NaN	21.861	21.8979	21.0819	20.1976	22.8898	K	3	___1	1	0.000416087
H7C579;Q9NQR4;F8WF70	H7C579	Omega-amidase NIT2	NIT2	YFPEYAEKIPGESTQKLSEVAKECSIYLIGG	162	27.1129	26.8781	27.1831	25.3633	27.5314	27.5473	27.898	28.0359	25.1341	28.6803	27.0022	26.2562	26.249	28.0182	K	2	___1	1	9.35724e-56
H7C5V1;Q9BTF0-2;Q9BTF0	H7C5V1	THUMP domain-containing protein 2	THUMPD2	ENEIIAKKLKIEQMQKIEENRDCQLEKQIKE	125	NaN	22.7466	22.0911	21.7665	22.9554	22.3182	22.3551	NaN	NaN	22.0544	21.6983	22.4747	22.3463	22.8649	K	2	___1	1	0.00408345
I3L141;O43149-2;O43149	I3L141	Zinc finger ZZ-type and EF-hand domain-containing protein 1	ZZEF1	PVTVPTGASEEQLEKKAVQGAELSEAGNGKR	381	NaN	22.3637	NaN	23.1654	22.6047	23.6859	NaN	NaN	23.304	23.038	NaN	23.7612	NaN	NaN	K	2	___1	1	0.00663205
I3L1F7;Q96M29	I3L1F7	Tektin-5	TEKT5	TNLAFNARISEVTDVKNKLQTQLAKTLQEIF	126	NaN	25.6118	22.5049	19.9912	23.5885	25.2201	24.4341	23.7725	23.6718	NaN	24.6886	25.4383	25.5085	23.4723	K	2	___1	1	0.00342036
I3L4A2;Q9UIC8;Q9UIC8-2	I3L4A2	Leucine carboxyl methyltransferase 1	LCMT1	AVIGADLRDLSELEEKLKKCNMNTQLPTLLI	71	NaN	NaN	NaN	NaN	NaN	NaN	NaN	20.1797	NaN	NaN	NaN	NaN	NaN	NaN	K	2	___1	1	0.00593773
I3L4N8;P60709;P63261;I3L3I0;I3L1U9;P68032;P62736;P63267;P63267-2;P68133;Q562R1	I3L4N8;P60709;P63261;P68032;P68133;Q562R1	Actin, cytoplasmic 1;Actin, cytoplasmic 1, N-terminally processed;Actin, cytoplasmic 2;Actin, cytoplasmic 2, N-terminally processed;Actin, alpha cardiac muscle 1;Actin, aortic smooth muscle;Actin, gamma-enteric smooth muscle;Actin, alpha skeletal muscle;Beta-actin-like protein 2	ACTG1;ACTB;ACTC1;ACTA2;ACTG2;ACTA1;ACTBL2	LRLDLAGRDLTDYLMKILTERGYNFTTTAER;LRLDLAGRDLTDYLMKILTERGYSFTTTAER;MRLDLAGRDLTDYLMKILTERGYSFVTTAER	193	NaN	NaN	NaN	NaN	NaN	NaN	NaN	NaN	NaN	23.597	24.6849	21.2706	NaN	NaN	K	2	___1	1	2.23696e-05
J3KN67;D6RGJ6;P06753	J3KN67;P06753	Tropomyosin alpha-3 chain	TPM3	KENALDRAEQAEAEQKQAEERSKQLEDELAA	31	23.0474	22.4473	NaN	22.5949	20.4712	20.5877	NaN	23.4718	NaN	NaN	21.4235	23.121	20.7073	20.4105	K	2	___1	1	6.1108e-147
J3KN67;P06753;P06753-5;P06753-4;P06753-7	J3KN67;P06753;P06753-5	Tropomyosin alpha-3 chain	TPM3	RGMKVIENRALKDEEKMELQEIQLKEAKHIA	141	23.386	NaN	NaN	NaN	NaN	NaN	NaN	24.4841	NaN	NaN	NaN	23.1017	NaN	NaN	K	3	___1	0.941298	3.53255e-09
J3KN67;D6RGJ6;P06753;P09493;H0YL52;H0YKP3;A0A087WTJ7;P09493-4;P09493-10;P09493-9;Q6ZN40	J3KN67;P06753;P09493;P09493-4;P09493-9;Q6ZN40	Tropomyosin alpha-3 chain;Tropomyosin alpha-1 chain	TPM3;TPM1	DELDKYSEALKDAQEKLELAEKKAADAEAEV;DELDKYSEALKDAQEKLELAEKKATDAEADV	71	29.6643	28.1398	27.604	28.9505	29.0911	28.3269	27.3972	29.4903	26.4969	28.2463	28.312	28.4829	27.2434	28.621	K	2	___1	1	7.5236e-13
J3KN67;D6RGJ6;P06753;P09493;H0YL52;H0YKP3;A0A087WTJ7;P09493-4;P09493-10;P09493-9;Q6ZN40	J3KN67;P06753;P09493;P09493-4;P09493-9;Q6ZN40	Tropomyosin alpha-3 chain;Tropomyosin alpha-1 chain	TPM3;TPM1	AAMQKKLKGTEDELDKYSEALKDAQEKLELA;VSLQKKLKGTEDELDKYSEALKDAQEKLELA	60	26.1904	24.5011	24.5375	26.5639	24.3736	25.1487	24.4302	26.5233	25.1733	24.8865	25.8066	25.8999	23.8329	26.205	K	2	___1	1	8.19828e-147
J3KN67;D6RGJ6;P06753;P09493;H0YL52;H0YKP3;A0A087WTJ7;P09493-4;P09493-10;P09493-9;Q6ZN40	J3KN67;P06753;P09493;P09493-4;P09493-9;Q6ZN40	Tropomyosin alpha-3 chain;Tropomyosin alpha-1 chain	TPM3;TPM1	LKGTEDELDKYSEALKDAQEKLELAEKKAAD;LKGTEDELDKYSEALKDAQEKLELAEKKATD	66	24.6268	24.0332	23.6204	25.2757	24.8433	24.2369	23.0194	25.549	23.5123	23.8364	24.546	24.6753	24.0074	24.0483	K	2	___1	1	1.2852e-18
J3KN67;P06753;P06753-5;P06753-4;P06753-7;K7EP68;P67936;K7EMU5;K7EPV9;P67936-2;K7ENT6;K7ERG3	J3KN67;P06753;P06753-5;P67936;P67936-2	Tropomyosin alpha-3 chain;Tropomyosin alpha-4 chain	TPM3;TPM4	IQLKEAKHIAEEADRKYEEVARKLVIIEGDL;MQLKEAKHIAEEADRKYEEVARKLVILEGEL	162	23.6798	NaN	NaN	NaN	NaN	NaN	NaN	NaN	NaN	NaN	NaN	NaN	NaN	NaN	K	3	___1	1	2.32086e-29
J3KN67;D6RGJ6;P06753	J3KN67;P06753	Tropomyosin alpha-3 chain	TPM3	EERSKQLEDELAAMQKKLKGTEDELDKYSEA	49	22.319	22.8749	22.4312	22.988	23.5211	23.7521	21.9891	22.9282	21.895	21.7527	24.0241	24.798	23.6213	23.9268	K	2	___1	1	2.50563e-31
J3KRC4;Q8TCD5;J3KSY6	J3KRC4	5'(3')-deoxyribonucleotidase, cytosolic type	NT5C	TRDKTVVLGDLLIDDKDTVRGGDPKLGAHLV	146	22.4398	NaN	NaN	NaN	NaN	NaN	NaN	23.3731	NaN	NaN	NaN	NaN	NaN	21.0835	K	3	___1	1	2.72378e-16
J3KS22;Q7Z4W1;J3KSZ5;J3QL34;J3QS36	J3KS22	L-xylulose reductase	DCXR	LDMLTKVMALELGPHKIRVNAVNPTVVMTSM	169	24.6606	23.3624	22.1984	21.686	25.4753	24.9114	23.1807	25.7972	NaN	26.1335	23.8506	20.5268	25.5965	25.7974	K	3	___1	1	2.46088e-05
J3QLR8;Q9Y3D9	J3QLR8	28S ribosomal protein S23, mitochondrial	MRPS23	APIQDIWYHEDRIRAKFYSVYGSGQRAFDLF	73	NaN	NaN	NaN	NaN	NaN	NaN	NaN	NaN	NaN	23.0467	20.7142	NaN	21.3882	NaN	K	2	___1	1	0.00521164
J3QLR8;Q9Y3D9	J3QLR8	28S ribosomal protein S23, mitochondrial	MRPS23	LFNPNFKSTCQRFVEKYTELQKLGETDEEKL	102	21.1679	NaN	NaN	NaN	20.8545	NaN	21.1379	22.076	20.2966	19.9569	21.0464	21.4579	22.0003	20.8456	K	2	___1	1	0.00242074
J3QQS1;J3QLS3;Q9Y2R9;J3KSI8	J3QQS1	28S ribosomal protein S7, mitochondrial	MRPS7	SHKLLEAFHNQGPVIKRKHDLHKMAEANRAL	151	NaN	NaN	NaN	NaN	NaN	NaN	NaN	20.5364	NaN	NaN	NaN	NaN	NaN	NaN	K	3	___1	1	2.13938e-06
J3QQS1;J3QLS3;Q9Y2R9;J3KSI8	J3QQS1	28S ribosomal protein S7, mitochondrial	MRPS7	DKKHQRTLMPEKLSHKLLEAFHNQGPVIKRK	138	21.566	NaN	NaN	NaN	NaN	NaN	NaN	22.1252	NaN	NaN	NaN	NaN	NaN	NaN	K	3	___1	1	9.23063e-35
J3QQZ9;Q9NVS9-3;Q9NVS9;A0A286YFL3;J3QQV6;Q9NVS9-4	J3QQZ9	Pyridoxine-5'-phosphate oxidase	PNPO	TCTRDGKPSARMLLLKGFGKDGFRFFTNFES	90	NaN	NaN	21.6832	NaN	NaN	21.5817	NaN	NaN	NaN	22.2371	21.5843	24.3171	22.7736	NaN	K	2	___1	1	0.00544101
J3QS51;Q9NPH2-2;Q9NPH2-3;Q9NPH2	J3QS51	Inositol-3-phosphate synthase 1	ISYNA1	DHCVVIKYVPYVGDSKRALDEYTSELMLGGT	62	NaN	25.4571	23.2654	24.9348	26.0682	24.379	NaN	24.7607	23.4955	21.8307	25.5444	24.9537	24.4619	25.0704	K	2	___1	1	0.00165373
K7EKP1;K7ERI9;K7EJI9;K7ELM9;K7EPF9;P02654	K7EKP1	Apolipoprotein C-I;Truncated apolipoprotein C-I	APOC1	SALDKLKEFGNTLEDKARELIS_________	47	22.9871	21.3289	NaN	21.4937	22.1416	20.2532	NaN	21.7997	NaN	NaN	21.7355	NaN	21.1074	20.8166	K	2	___1	1	0.000352995
K7EK07;P84243;K7EMV3;B4DEB1;K7ES00;P68431;Q16695;Q71DI3	K7EK07;P68431;Q16695;Q71DI3	Histone H3;Histone H3.3;Histone H3.1;Histone H3.1t;Histone H3.2	H3F3B;H3F3A;HIST1H3A;HIST3H3;HIST2H3A	KLPFQRLMREIAQDFKTDLRFQSSAVMALQE;KLPFQRLVREIAQDFKTDLRFQSAAIGALQE;KLPFQRLVREIAQDFKTDLRFQSSAVMALQE	80	24.547	NaN	23.1178	25.1691	25.2961	24.7359	24.4261	25.3369	23.6263	25.0079	25.0669	22.9462	24.2467	25.2262	K	2	___1	1	2.23122e-10
K7EK07;P84243;K7EMV3;B4DEB1;K7ES00;K7EP01;Q6NXT2;P68431;Q5TEC6;Q71DI3	K7EK07;P68431;Q5TEC6;Q71DI3	Histone H3;Histone H3.3;Histone H3.3C;Histone H3.1;Histone H3.2	H3F3B;H3F3A;H3F3C;HIST1H3A;HIST2H3PS2;HIST2H3A	RKSTGGKAPRKQLATKAARKSAPATGGVKKP;RKSTGGKAPRKQLATKAARKSAPSTGGVKKP	24	29.1544	NaN	25.2407	26.3166	25.6455	25.9548	25.1957	28.7222	27.6087	26.2917	26.6592	27.3233	26.9118	26.5471	K	2	___1	1	5.11642e-13
K7EK07;P84243;K7EMV3;B4DEB1;K7ES00;K7EP01;Q6NXT2;P68431;Q16695;Q5TEC6;Q71DI3	K7EK07;P68431;Q16695;Q5TEC6;Q71DI3	Histone H3;Histone H3.3;Histone H3.3C;Histone H3.1;Histone H3.1t;Histone H3.2	H3F3B;H3F3A;H3F3C;HIST1H3A;HIST3H3;HIST2H3PS2;HIST2H3A	_MARTKQTARKSTGGKAPRKQLATKAARKSA;_MARTKQTARKSTGGKAPRKQLATKVARKSA	15	23.9125	NaN	NaN	NaN	NaN	NaN	NaN	23.6153	NaN	NaN	NaN	NaN	NaN	NaN	K	2	___1	1	0.0128959
K7ENV7;K7EKW4;Q96AB3-3;Q96AB3;Q96AB3-2	K7ENV7	Isochorismatase domain-containing protein 2, mitochondrial	ISOC2	VLPGSSVLFLCDMQEKFRHNIAYFPQIVSVA	26	NaN	NaN	NaN	NaN	NaN	NaN	NaN	22.1031	NaN	25.3324	23.3488	NaN	NaN	NaN	K	3	___1	1	4.75527e-10
K7EQW8	K7EQW8		TPM4	ETRAEFAERTVAKLEKTIDDLEDELYAQKLK	26	26.0557	23.5167	22.5662	22.8499	24.415	21.4197	21.3575	24.4807	NaN	25.3693	24.1174	24.8198	21.9084	23.0066	K	2	___1	1	1.25494e-96
K7EQW8;P06753	K7EQW8;P06753	Tropomyosin alpha-3 chain	TPM4;TPM3	LEKTIDDLEDELYAQKLKYKAISEELDHALN	265	24.2545	25.4245	21.7849	24.6658	26.2046	25.6727	23.4185	24.6075	NaN	26.3604	26.0482	26.6465	24.7915	25.2461	K	2	___1	1	1.18258e-196
K7ER15;Q9H0R4;K7EMY7;K7EJQ8;A0A1B0GXB1;K7EQD2	K7ER15	Haloacid dehalogenase-like hydrolase domain-containing protein 2	HDHD2	LRGASVIIRFVTNTTKESKQDLLERLRKLEF	50	NaN	NaN	20.2144	20.2195	NaN	NaN	19.5039	21.1005	NaN	19.875	20.3403	20.0497	20.5689	20.74	K	2	___1	1	0.000147182
K7ER15;Q9H0R4;K7EMY7;Q9H0R4-2	K7ER15	Haloacid dehalogenase-like hydrolase domain-containing protein 2	HDHD2	AFRLLLDGAPLIAIHKARYYKRKDGLALGPG	145	22.4621	NaN	NaN	NaN	NaN	NaN	NaN	20.3579	NaN	NaN	NaN	NaN	NaN	NaN	K	3	___1	1	0.00290204
K7ES70	K7ES70		MFAP4	_________MVGANAKRTGDLWSWEGAVLTL	7	NaN	NaN	NaN	NaN	NaN	NaN	NaN	NaN	NaN	NaN	24.7722	24.7638	24.5609	NaN	K	1	___1	1	0.00431626
M0QWZ7;M0R2C6;Q9NP81;Q9NP81-2;M0R2H5;B4DJM9	M0QWZ7	Serine--tRNA ligase, mitochondrial	SARS2	ELRQLQEQIRSLEEEKAAVTEAVRALLANQD	110	22.1352	NaN	22.908	22.7845	24.7635	24.7236	23.5348	24.5662	20.9844	25.5817	23.9882	NaN	23.0972	24.0212	K	3	___1	1	2.38273e-29
M0QWZ7;M0R2C6;Q9NP81;Q9NP81-2	M0QWZ7	Serine--tRNA ligase, mitochondrial	SARS2	VGDESQARVLHMVGDKPVFSFQPRGHLEIGE	195	23.523	NaN	NaN	NaN	NaN	NaN	NaN	24.6994	NaN	NaN	NaN	NaN	NaN	NaN	K	3	___1	1	2.17785e-06
M0QZ10;M0QXF9;O15382	M0QZ10	Branched-chain-amino-acid aminotransferase;Branched-chain-amino-acid aminotransferase, mitochondrial	BCAT2	SSSFKAADLQLEMTQKPHKKPGPGEPLVFGK	44	23.3936	23.0895	22.7359	23.9908	23.611	23.7723	23.6506	23.6502	25.5041	24.5432	24.231	25.3435	25.5883	25.8491	K	3	___1	1	3.36927e-07
M0QZ10;M0QXF9;O15382;B3KSI3;M0QZP4;O15382-2	M0QZ10	Branched-chain-amino-acid aminotransferase;Branched-chain-amino-acid aminotransferase, mitochondrial	BCAT2	GGNYGPTVLVQQEALKRGCEQVLWLYGPDHQ	246	24.3679	NaN	NaN	NaN	26.0534	24.7776	NaN	24.9612	25.1766	26.9866	25.1047	NaN	25.7411	23.6595	K	3	___1	1	1.9143e-57
M0QZ10;M0QXF9;O15382;B3KSI3;M0QZP4;O15382-2	M0QZ10	Branched-chain-amino-acid aminotransferase;Branched-chain-amino-acid aminotransferase, mitochondrial	BCAT2	QTWGEFRVVERTITMKQLLRALEEGRVREVF	321	25.0065	24.8701	25.8386	24.3852	26.8151	26.7544	25.7234	26.3225	23.5058	26.3409	26.118	26.3461	27.1232	25.9099	K	2	___1	1	0.000174158
M0QYT0;M0QXS7;M0R1A2;Q13011;M0R248;M0QZW4	M0QYT0;Q13011	Delta(3,5)-Delta(2,4)-dienoyl-CoA isomerase, mitochondrial	ECH1	AMNKVFWREMVECFNKISRDADCRAVVISGA	95	20.3997	NaN	NaN	NaN	NaN	20.5736	NaN	20.6393	NaN	20.9221	NaN	21.2113	22.8261	20.8996	K	2	___1	1	7.92831e-07
M0R0N0	M0R0N0		NDUFA7	RYQEISKRSAVAATEKKAVTPAPPIKRWELS	42	NaN	NaN	NaN	NaN	NaN	NaN	NaN	19.2913	NaN	NaN	NaN	NaN	NaN	NaN	K	2	___1	1	0.00479351
O00330-3;O00330	O00330-3	Pyruvate dehydrogenase protein X component, mitochondrial	PDHX	GAVLKVRQDLVKDDIKVSVNDFIIKAAAVTL	310	25.4369	NaN	24.5412	25.5261	24.9911	26.1531	26.0405	25.1434	25.2827	NaN	26.8167	25.7037	26.7307	26.1781	K	2	___1	1	1.19807e-15
O00330-3;O00330	O00330-3	Pyruvate dehydrogenase protein X component, mitochondrial	PDHX	TATGPRGIFTKEDALKLVQLKQTGKITESRP	203	23.0135	NaN	24.8091	24.4791	25.6687	24.1351	24.2958	23.6856	NaN	NaN	24.7495	26.2083	24.1544	25.433	K	2	___1	1	9.30517e-05
O00330-3;O00330	O00330-3	Pyruvate dehydrogenase protein X component, mitochondrial	PDHX	RGIFTKEDALKLVQLKQTGKITESRPTPAPT	208	24.6158	NaN	NaN	NaN	23.341	23.2718	22.6844	24.2359	NaN	20.3259	22.5814	23.1093	22.2549	23.5479	K	2	___1	1	0.00219778
O00330-3;O00330;H0YD97;O00330-2	O00330-3	Pyruvate dehydrogenase protein X component, mitochondrial	PDHX	RVVDDELATRFLKSFKANLENPIRLA_____	476	26.1063	23.9868	25.0498	24.206	25.9094	25.4124	25.4658	26.6139	25.7595	25.9703	25.0367	26.2768	26.2114	26.8196	K	2	___1	1	1.97431e-79
O00330-3;O00330;H0YD97;O00330-2	O00330-3	Pyruvate dehydrogenase protein X component, mitochondrial	PDHX	PQACILAVGRFRPVLKLTEDEEGNAKLQQRQ	435	26.0256	NaN	NaN	NaN	NaN	NaN	NaN	26.1409	NaN	NaN	NaN	NaN	NaN	NaN	K	2	___1	1	4.59124e-13
O00330-3;O00330;H0YD97;O00330-2	O00330-3	Pyruvate dehydrogenase protein X component, mitochondrial	PDHX	FRPVLKLTEDEEGNAKLQQRQLITVTMSSDS	445	25.8003	24.7538	26.3469	25.9714	25.7345	26.5585	25.6157	26.8578	25.0492	26.2868	25.9642	25.662	26.5961	26.4002	K	3	___1	1	0
O00330-3;O00330;H0YD97;O00330-2	O00330-3	Pyruvate dehydrogenase protein X component, mitochondrial	PDHX	KDAAAKGIQEIADSVKALSKKARDGKLLPEE	379	NaN	NaN	NaN	NaN	NaN	NaN	NaN	22.1347	NaN	NaN	22.7401	22.2054	21.326	21.8114	K	2	___1	1	4.02857e-14
O00330-3;O00330;E9PLU0;E9PRI6	O00330-3	Pyruvate dehydrogenase protein X component, mitochondrial	PDHX	SDDGILAKIVVEEGSKNIRLGSLIGLIVEEG	105	NaN	NaN	NaN	NaN	NaN	NaN	NaN	NaN	22.5845	NaN	NaN	23.3898	NaN	21.4838	K	2	___1	1	0.000193645
O00330-3;O00330;E9PLU0;E9PRI6	O00330-3	Pyruvate dehydrogenase protein X component, mitochondrial	PDHX	TLRFRLSPAARNILEKHSLDASQGTATGPRG	179	25.3764	21.5424	21.857	22.5201	24.2436	22.066	NaN	25.224	22.5779	NaN	22.3796	23.6086	21.6709	23.4091	K	3	___1	1	5.40025e-107
O00330-3;O00330;E9PLU0;E9PRI6	O00330-3	Pyruvate dehydrogenase protein X component, mitochondrial	PDHX	SEPRPSPEPQISIPVKKEHIPGTLRFRLSPA	157	22.9759	NaN	21.9585	21.8366	22.3919	21.3422	NaN	22.9564	22.595	NaN	NaN	22.4657	NaN	21.5002	K	2	___1	1	1.33097e-27
O00330-3;O00330	O00330-3	Pyruvate dehydrogenase protein X component, mitochondrial	PDHX	PHAYATADCDLGAVLKVRQDLVKDDIKVSVN	299	24.7068	NaN	NaN	NaN	NaN	NaN	NaN	25.8366	NaN	25.68	23.1347	NaN	22.8416	22.2541	K	3	___1	1	1.11975e-22
O00483	O00483	Cytochrome c oxidase subunit NDUFA4	NDUFA4	PNDQYKFYSVNVDYSKLKKERPDF_______	73	NaN	NaN	21.0594	20.9018	23.0362	22.9996	21.8114	23.0628	NaN	24.0697	23.869	NaN	23.4158	23.696	K	2	___1	1	0.000538791
O00483	O00483	Cytochrome c oxidase subunit NDUFA4	NDUFA4	NNPEPWNKLGPNDQYKFYSVNVDYSKLKKER	63	20.9774	NaN	NaN	NaN	NaN	NaN	NaN	21.7756	NaN	NaN	NaN	NaN	NaN	NaN	K	3	___1	1	5.68057e-24
O00499-6;O00499-11;O00499-2;O00499-9;O00499-10;O00499-7;O00499-8;O00499-4;O00499;O00499-3;O00499-5	O00499-6	Myc box-dependent-interacting protein 1	BIN1	KKDEAKIAKAEEELIKAQKVFEEMNVDLQEE	180	NaN	22.3266	24.3747	25.3077	23.7503	22.5227	24.2782	NaN	22.5563	23.8739	24.9898	24.6595	23.4221	24.4561	K	2	___1	1	1.46894e-06
O00499-6;O00499-11;O00499-2;O00499-9;O00499-10;O00499-7;O00499-8;O00499-4;O00499;O00499-3;O00499-5;A0A0A0MT10;A0A087X188;Q9UBW5-2;Q9UBW5;P49418-2;P49418;S4R3J0	O00499-6	Myc box-dependent-interacting protein 1;Bridging integrator 2;Amphiphysin	BIN1;BIN2;AMPH	KIASNVQKKLTRAQEKVLQKLGKADETKDEQ	28	23.83	23.6857	NaN	NaN	22.1603	21.0917	NaN	NaN	NaN	NaN	NaN	NaN	NaN	23.9459	K	2	___1	1	0.00496433
O00499-6;O00499-11;O00499-2;O00499-9;O00499-10;O00499-7;O00499-8;O00499-4;O00499;O00499-3;O00499-5	O00499-6	Myc box-dependent-interacting protein 1	BIN1	QSIAGLEENFHKEMSKLNQNLNDVLVGLEKQ	227	20.8368	NaN	NaN	NaN	NaN	NaN	NaN	21.0537	NaN	NaN	NaN	NaN	NaN	NaN	K	3	___1	1	0.000204765
O00499-6;O00499-11;O00499-2;O00499-9;O00499-10;O00499-7;O00499-8;O00499-4;O00499;O00499-3;O00499-5	O00499-6	Myc box-dependent-interacting protein 1	BIN1	SKLNQNLNDVLVGLEKQHGSNTFTVKAQPSD	241	22.3759	NaN	NaN	22.6962	NaN	NaN	NaN	22.2646	NaN	NaN	NaN	NaN	NaN	NaN	K	3	___1	1	1.164e-40
O00499-6;O00499-11;O00499-2;O00499-9;O00499-10;O00499-7;O00499-8;O00499-4;O00499;O00499-3;O00499-5	O00499-6	Myc box-dependent-interacting protein 1	BIN1	DYDSARHHYESLQTAKKKDEAKIAKAEEELI	164	NaN	NaN	NaN	NaN	NaN	NaN	NaN	21.7842	NaN	NaN	NaN	NaN	NaN	NaN	K	3	___1	1	0.00584192
O00757	O00757	Fructose-1,6-bisphosphatase isozyme 2	FBP2	LYGIAGSVNVTGDEVKKLDVLSNSLVINMVQ	72	20.5336	NaN	NaN	NaN	NaN	NaN	NaN	21.0672	NaN	NaN	NaN	NaN	NaN	NaN	K	3	___1	1	1.21717e-15
O00757	O00757	Fructose-1,6-bisphosphatase isozyme 2	FBP2	GYAKYFDAATTEYVQKKKFPEDGSAPYGARY	230	NaN	NaN	NaN	21.5403	21.9898	20.8564	NaN	22.8486	NaN	21.8852	22.2906	NaN	NaN	NaN	K	2	___1	1	1.18049e-06
O14548	O14548	Cytochrome c oxidase subunit 7A-related protein, mitochondrial	COX7A2L	TVYDYAGKNKVPELQKFFQKADGVPVYLKRG	65	20.0682	NaN	21.9532	22.8766	22.0747	NaN	NaN	21.1555	NaN	23.8557	22.9807	NaN	23.787	22.9745	K	2	___1	1	1.37511e-07
O14561;I3L505	O14561	Acyl carrier protein, mitochondrial;Acyl carrier protein	NDUFAB1	RVLYVLKLYDKIDPEKLSVNSHFMKDLGLDS	97	28.9138	26.0478	26.5409	26.9276	28.9949	28.1593	27.1193	30.2822	26.759	29.4709	28.4438	29.1756	28.5899	29.104	K	3	___1	1	4.74257e-06
O14561;H3BNK3	O14561	Acyl carrier protein, mitochondrial;Acyl carrier protein	NDUFAB1	EKLMCPQEIVDYIADKKDVYE__________	151	21.8665	NaN	NaN	NaN	NaN	NaN	NaN	24.0423	NaN	25.8133	23.4357	22.4675	NaN	NaN	K	3	___1	1	4.57044e-06
O14561;I3L505	O14561	Acyl carrier protein, mitochondrial;Acyl carrier protein	NDUFAB1	EGIQDRVLYVLKLYDKIDPEKLSVNSHFMKD	92	23.1635	NaN	NaN	NaN	23.1292	22.2355	NaN	22.8907	22.0484	NaN	22.3326	25.1136	22.5347	24.0034	K	2	___1	1	0.00038742
O14561;I3L505	O14561	Acyl carrier protein, mitochondrial;Acyl carrier protein	NDUFAB1	PLTLEGIQDRVLYVLKLYDKIDPEKLSVNSH	88	27.9783	25.2304	27.9777	28.1361	28.8239	28.6544	27.726	28.3187	26.0602	30.454	28.7248	26.8875	28.974	27.8274	K	2	___1	1	5.61369e-05
O14686;O14686-3	O14686	Histone-lysine N-methyltransferase 2D	KMT2D	DIFNEHLRLVESANEKAEREALLRGVEPGPL	3079	21.5231	NaN	NaN	NaN	NaN	NaN	NaN	21.4659	NaN	NaN	NaN	NaN	NaN	NaN	K	2	___1	1	0.000114235
O14737;O14737-2;K7EQA1	O14737	Programmed cell death protein 5	PDCD5	SARARLSNLALVKPEKTKAVENYLIQMARYG	66	20.1604	NaN	NaN	NaN	NaN	NaN	NaN	21.7766	NaN	20.2672	22.0055	NaN	21.1421	21.7077	K	3	___1	0.978406	0.00576975
O14958;O14958-2	O14958	Calsequestrin-2	CASQ2	QVLEHKAIGFVMVDAKKEAKLAKKLGFDEEG	97	NaN	NaN	NaN	NaN	22.8785	23.343	22.5958	21.0718	NaN	23.8342	22.5401	23.7701	24.3039	23.8761	K	2	___1	1	0.00356081
O14958;O14958-2	O14958	Calsequestrin-2	CASQ2	FPTYDGKDRVVSLSEKNFKQVLKKYDLLCLY	40	23.355	23.0407	23.0553	23.3701	23.5787	23.837	22.9965	23.8468	22.2567	20.7755	22.8089	24.0034	23.3798	23.8555	K	2	___1	1	6.62495e-05
O14983-2;O14983;O14983-3	O14983-2	Sarcoplasmic/endoplasmic reticulum calcium ATPase 1	ATP2A1	VYCSPAKSSRAAVGNKMFVKGAPEGVIDRCN	511	NaN	23.4109	23.7679	24.8242	22.9942	23.6261	23.3713	22.779	23.9738	21.4177	24.1769	22.0726	23.6121	24.6703	K	2	___1	1	0.00015865
O14983-2;O14983;O14983-3	O14983-2	Sarcoplasmic/endoplasmic reticulum calcium ATPase 1	ATP2A1	RVGTTRVPLTGPVKEKIMAVIKEWGTGRDTL	544	23.9383	24.6259	23.7032	25.7904	22.9948	25.3457	NaN	23.977	24.5388	NaN	24.9855	23.0799	23.9561	26.201	K	2	___1	1	0.00526939
O14983-2;O14983;O14983-3	O14983-2	Sarcoplasmic/endoplasmic reticulum calcium ATPase 1	ATP2A1	AVGDKVPADIRILAIKSTTLRVDQSILTGES	169	22.0249	NaN	NaN	22.2836	22.1591	22.7444	21.7578	22.7737	NaN	NaN	NaN	NaN	NaN	NaN	K	2	___1	1	0.00411235
O14983-2;O14983	O14983-2	Sarcoplasmic/endoplasmic reticulum calcium ATPase 1	ATP2A1	ETTGLTPDQVKRNLEKYGLNELPAEEGKTLW	35	23.8964	NaN	NaN	23.377	23.5116	23.0579	22.1014	23.6777	22.1652	NaN	22.8786	NaN	21.5467	23.289	K	2	___1	1	2.36218e-182
O15273;J3KT40	O15273	Telethonin	TCAP	LPYQRVLPLPIFTPAKMGATKEEREDTPIQL	98	NaN	NaN	NaN	NaN	NaN	NaN	NaN	21.5011	NaN	NaN	NaN	NaN	NaN	NaN	K	2	___1	1	3.46259e-10
O43252	O43252	Bifunctional 3'-phosphoadenosine 5'-phosphosulfate synthase 1;Sulfate adenylyltransferase;Adenylyl-sulfate kinase	PAPSS1	WNDGLDQYRLTPTELKQKFKDMNADAVFAFQ	404	19.5322	20.8155	22.4647	22.2353	23.2344	24.3067	23.2836	22.9517	19.9336	24.614	22.7639	21.6878	23.5197	23.7442	K	2	___1	1	0.00144716
O43676;C9JKQ2	O43676	NADH dehydrogenase [ubiquinone] 1 beta subcomplex subunit 3	NDUFB3	YRQWKIEGTPLETIQKKLAAKGLRDPWGRNE	34	30.6262	30.2479	30.7205	30.0812	31.0456	31.8079	29.6626	31.492	30.34	31.7505	30.8981	30.3587	32.2978	32.2178	K	2	___1	1	3.95611e-38
O43678;O43678-2	O43678	NADH dehydrogenase [ubiquinone] 1 alpha subcomplex subunit 2	NDUFA2	___MAAAAASRGVGAKLGLREIRIHLCQRSP	13	NaN	NaN	25.3484	25.1316	26.5178	27.6191	25.9447	27.6715	21.889	23.7171	26.3729	22.502	28.1373	26.9658	K	2	___1	1	0.00415748
O43707;O43707-2;P12814-2;P12814;P12814-3;P12814-4;H9KV75	O43707;P12814-2	Alpha-actinin-4;Alpha-actinin-1	ACTN4;ACTN1	LNEIRRLERLDHLAEKFRQKASIHEAWTDGK	417	21.7971	NaN	NaN	NaN	NaN	NaN	NaN	21.6292	NaN	NaN	NaN	NaN	21.8448	19.903	K	3	___1	1	0.00154657
O43708;O43708-3	O43708	Maleylacetoacetate isomerase	GSTZ1	SWRVRIALALKGIDYKTVPINLIKDRGQQFS	32	NaN	25.5489	NaN	NaN	NaN	24.9579	NaN	NaN	NaN	NaN	NaN	NaN	25.6904	26.8478	K	2	___1	1	1.33132e-10
O43809	O43809	Cleavage and polyadenylation specificity factor subunit 5	NUDT21	RSQTGWPRGVTQFGNKYIQQTKPLTLERTIN	23	NaN	21.4659	NaN	21.2192	NaN	20.5604	NaN	NaN	NaN	NaN	21.5244	NaN	21.2332	22.3115	K	2	___1	1	2.30302e-94
O43920	O43920	NADH dehydrogenase [ubiquinone] iron-sulfur protein 5	NDUFS5	________MPFLDIQKRFGLNIDRWLTIQSG	8	22.646	NaN	21.4473	21.0089	22.2734	20.9543	21.9084	23.0608	NaN	20.1245	22.0897	22.1288	22.0627	23.295	K	2	___1	1	0.00799215
O60662;O60662-2	O60662	Kelch-like protein 41	KLHL41	TEKYFKDHVEKDDIIKSNPDLQKKIKVLKDA	243	NaN	21.6478	21.067	22.8192	22.2337	22.5534	NaN	NaN	22.0869	NaN	21.5129	22.0201	21.5937	22.2656	K	2	___1	1	2.01968e-12
O60662;O60662-2	O60662	Kelch-like protein 41	KLHL41	RFRLMTEKYFKDHVEKDDIIKSNPDLQKKIK	238	22.1075	21.4642	NaN	NaN	21.8791	20.4035	NaN	24.7297	NaN	NaN	19.4038	NaN	NaN	21.4395	K	2	___1	1	6.0316e-31
O60662;O60662-2	O60662	Kelch-like protein 41	KLHL41	LKDLLDEKKFIDCTLKAGDKSLPCHRLILSA	38	22.7138	23.3472	22.9427	24.3439	21.8304	23.7789	NaN	24.3165	22.7115	23.8719	25.3463	23.7976	25.0436	25.1201	K	2	___1	1	0.000532843
O60662;O60662-2	O60662	Kelch-like protein 41	KLHL41	LSEVFDCIRFRLMTEKYFKDHVEKDDIIKSN	230	22.9449	23.0645	24.3569	25.0754	25.1112	24.9467	23.67	24.9703	22.8743	23.9032	25.1185	22.1119	24.9061	24.9814	K	2	___1	1	0.00380489
O60662;O60662-2;E9PBE3	O60662	Kelch-like protein 41	KLHL41	TDDKKCTNRVFIFNPKKGDWKDLAPMKIPRS	471	NaN	NaN	26.3418	27.5932	27.4188	27.5453	26.5257	22.2731	24.5208	NaN	NaN	25.7445	24.8238	25.6937	K	2	___1	1	0.00502164
O60814;P57053;P62807;U3KQK0;Q99880;Q99877;Q93079;P58876;Q16778;Q8N257;P23527;Q6DRA6;Q6DN03	O60814;P62807;Q16778	Histone H2B type 1-K;Histone H2B type F-S;Histone H2B type 1-C/E/F/G/I;Histone H2B;Histone H2B type 1-L;Histone H2B type 1-N;Histone H2B type 1-H;Histone H2B type 1-D;Histone H2B type 2-E;Histone H2B type 3-B;Histone H2B type 1-O;Putative histone H2B type 2-D;Putative histone H2B type 2-C	HIST1H2BK;H2BFS;HIST1H2BC;HIST1H2BN;HIST1H2BL;HIST1H2BH;HIST1H2BD;HIST2H2BE;HIST3H2BB;HIST1H2BO;HIST2H2BD;HIST2H2BC	KSAPAPKKGSKKAVTKAQKKDGKKRKRSRKE	21	23.3877	NaN	NaN	22.3714	NaN	NaN	NaN	22.5273	NaN	NaN	NaN	NaN	NaN	NaN	K	2	___1	1	6.54355e-32
O60814;P57053;P62807;U3KQK0;Q99880;Q99877;Q93079;P58876;Q99879;Q96A08;Q16778;Q8N257;P23527;P33778;Q5QNW6;Q5QNW6-2	O60814;P62807;Q16778;Q5QNW6	Histone H2B type 1-K;Histone H2B type F-S;Histone H2B type 1-C/E/F/G/I;Histone H2B;Histone H2B type 1-L;Histone H2B type 1-N;Histone H2B type 1-H;Histone H2B type 1-D;Histone H2B type 1-M;Histone H2B type 1-A;Histone H2B type 2-E;Histone H2B type 3-B;Histone H2B type 1-O;Histone H2B type 1-B;Histone H2B type 2-F	HIST1H2BK;H2BFS;HIST1H2BC;HIST1H2BN;HIST1H2BL;HIST1H2BH;HIST1H2BD;HIST1H2BM;HIST1H2BA;HIST2H2BE;HIST3H2BB;HIST1H2BO;HIST1H2BB;HIST2H2BF	EIQTAVRLLLPGELAKHAVSEGTKAVTKYTS	109	NaN	NaN	NaN	NaN	NaN	NaN	NaN	20.9065	NaN	NaN	NaN	NaN	NaN	NaN	K	3	___1	1	4.48088e-05
O60814;P57053;P62807;Q16778	O60814;P62807;Q16778	Histone H2B type 1-K;Histone H2B type F-S;Histone H2B type 1-C/E/F/G/I;Histone H2B type 2-E	HIST1H2BK;H2BFS;HIST1H2BC;HIST2H2BE	__________MPEPAKSAPAPKKGSKKAVTK	6	24.4653	23.3483	21.5226	24.3224	NaN	22.3541	21.2594	23.8166	23.0166	21.2035	23.2006	NaN	22.9514	22.998	K	2	___1	1	2.6236e-05
O75083;D6RD66	O75083	WD repeat-containing protein 1	WDR1	GEITGHNKVINSVDIKQSRPYRLATGSDDNC	155	NaN	NaN	NaN	21.667	NaN	NaN	20.6019	NaN	NaN	19.7749	21.9869	NaN	21.4551	22.1411	K	2	___1	1	0.000994107
O75112-2;O75112-7;O75112;O75112-3;A0A0C4DGG7;O75112-6;O75112-4;O75112-5	O75112-2;O75112-6	LIM domain-binding protein 3	LDB3	NKIKSASYNLSLTLQKSKRPIPISTTAPPVQ	82	NaN	NaN	NaN	NaN	NaN	22.8308	NaN	NaN	NaN	NaN	NaN	NaN	NaN	NaN	K	2	___1	1	1.36354e-05
O75208;H3BNT2;H3BPY0	O75208	Ubiquinone biosynthesis protein COQ9, mitochondrial	COQ9	VLEEEQKLVQLGQAEKRKTDQFLRDAVETRL	175	24.6935	25.0297	25.2554	25.3228	25.7042	26.5282	22.2471	25.8731	23.5881	25.0179	25.7614	25.8272	25.9967	23.9688	K	2	___1	1	0.000268931
O75208;H3BNT2;H3BSJ5;H3BRC0;H3BPC6;H3BPW3;H3BVA5;O75208-2	O75208	Ubiquinone biosynthesis protein COQ9, mitochondrial	COQ9	PNSFSQQHSETQGAEKPDPESSHSPPRYTDQ	70	23.2582	NaN	NaN	NaN	NaN	NaN	NaN	25.0438	NaN	22.7219	NaN	NaN	NaN	NaN	K	4	___1	1	4.64131e-40
O75208;H3BNT2;H3BPY0	O75208	Ubiquinone biosynthesis protein COQ9, mitochondrial	COQ9	TQCNTRLTRVLEEEQKLVQLGQAEKRKTDQF	166	22.6475	NaN	24.7971	NaN	25.5387	26.2422	23.7344	24.2988	24.3348	24.0503	23.9408	24.1133	26.0837	24.9084	K	3	___1	1	2.51649e-162
O75306-2;O75306	O75306-2	NADH dehydrogenase [ubiquinone] iron-sulfur protein 2, mitochondrial	NDUFS2	CKIKAPGFAHLAGLDKMSKGHMLADVVAIIG	437	23.1586	NaN	NaN	NaN	21.784	NaN	NaN	24.2834	NaN	NaN	21.6499	NaN	NaN	22.0736	K	3	___1	1	3.13532e-05
O75323;O75323-2;F8WBI5	O75323	Protein NipSnap homolog 2	GBAS	RKVDPRKDAHSNLLAKKETSNLYKLQFHNVK	67	21.2123	21.5479	20.9082	21.1138	23.1089	22.7072	NaN	23.1868	21.7931	20.7632	22.7462	NaN	22.1781	22.6868	K	2	___1	1	1.01977e-06
O75323;F8WBI5	O75323	Protein NipSnap homolog 2	GBAS	AHSNLLAKKETSNLYKLQFHNVKPECLEAYN	75	25.1261	NaN	NaN	NaN	NaN	NaN	NaN	24.8403	NaN	NaN	NaN	NaN	NaN	NaN	K	4	___1	1	1.2962e-30
O75323;O75323-2	O75323	Protein NipSnap homolog 2	GBAS	VPLIQEMESRIMIPLKTSPLQ__________	281	21.4779	NaN	NaN	21.9088	NaN	22.6937	NaN	22.2903	NaN	22.6479	NaN	23.3768	23.3438	23.5839	K	2	___1	1	0.000881343
O75323;H7C333	O75323	Protein NipSnap homolog 2	GBAS	WRYEGGYPALTEVMNKLRENKEFLEFRKARS	143	21.0451	NaN	23.3927	22.5321	23.3225	23.8533	NaN	23.5989	NaN	26.6153	25.1353	22.4969	24.6796	23.9682	K	2	___1	1	8.2606e-10
O75367-3;O75367;O75367-2;D6RCF2	O75367-3	Core histone macro-H2A.1;Histone H2A	H2AFY	NIHPELLAKKRGSKGKLEAIITPPPAKKAKS	123	NaN	NaN	NaN	22.0767	NaN	NaN	NaN	NaN	NaN	NaN	22.0932	NaN	22.0245	21.858	K	2	___1	1	0.000233331
O75367-3;O75367;O75367-2;D6RCF2	O75367-3	Core histone macro-H2A.1;Histone H2A	H2AFY	ASGGVLPNIHPELLAKKRGSKGKLEAIITPP	116	NaN	NaN	NaN	NaN	NaN	NaN	NaN	20.7393	NaN	NaN	NaN	NaN	NaN	NaN	K	3	___1	1	0.00238712
O75380;D6RBT3	O75380	NADH dehydrogenase [ubiquinone] iron-sulfur protein 6, mitochondrial	NDUFS6	LGARCFGVRVSPTGEKVTHTGQVYDDKDYRR	38	24.9063	21.8615	NaN	22.2249	24.5883	22.3918	NaN	25.5746	22.0121	20.2621	23.1268	23.4851	21.6569	22.9414	K	3	___1	1	5.88806e-17
O75380;D6RBT3	O75380	NADH dehydrogenase [ubiquinone] iron-sulfur protein 6, mitochondrial	NDUFS6	PTGEKVTHTGQVYDDKDYRRIRFVGRQKEVN	49	23.5051	NaN	NaN	NaN	NaN	NaN	NaN	23.2435	NaN	NaN	NaN	NaN	NaN	NaN	K	4	___1	1	6.19684e-05
O75380	O75380	NADH dehydrogenase [ubiquinone] iron-sulfur protein 6, mitochondrial	NDUFS6	GGGALGHPKVYINLDKETKTGTCGYCGLQFR	105	NaN	NaN	NaN	NaN	22.1015	NaN	NaN	NaN	NaN	NaN	21.9865	23.1413	20.7448	23.0055	K	2	___1	1	0.000164752
O75489;E9PS48;O75489-2	O75489	NADH dehydrogenase [ubiquinone] iron-sulfur protein 3, mitochondrial	NDUFS3	IPVLTFLRDHTNAQFKSLVDLTAVDVPTRQN	109	NaN	NaN	NaN	NaN	NaN	NaN	NaN	23.3506	NaN	NaN	NaN	NaN	NaN	NaN	K	3	___1	1	2.89946e-49
O75531	O75531	Barrier-to-autointegration factor;Barrier-to-autointegration factor, N-terminally processed	BANF1	EKPVGSLAGIGEVLGKKLEERGFDKAYVVLG	32	21.9945	NaN	24.0028	23.7797	24.2122	23.2415	22.2381	22.143	NaN	NaN	23.7451	NaN	NaN	23.3609	K	2	___1	1	3.81914e-52
O75569-3;O75569-2;O75569	O75569-3	Interferon-inducible double-stranded RNA-dependent protein kinase activator A	PRKRA	GKGASKKQAKRNAAEKFLAKFSNISPENHIS	162	NaN	NaN	NaN	20.8433	NaN	20.8444	NaN	NaN	NaN	NaN	21.0405	22.6952	20.6087	20.7596	K	2	___1	1	0.00493541
O75746;O75746-2;Q9UJS0;Q9UJS0-2	O75746;Q9UJS0	Calcium-binding mitochondrial carrier protein Aralar1;Calcium-binding mitochondrial carrier protein Aralar2	SLC25A12;SLC25A13	GLIPQLIGVAPEKAIKLTVNDFVRDKFTRRD;GLLPQLLGVAPEKAIKLTVNDFVRDKFMHKD	406	22.0077	NaN	23.101	23.9208	24.1622	24.2024	NaN	22.7093	NaN	NaN	24.1334	23.2982	24.2554	23.896	K	2	___1	1	4.28141e-08
O75746;O75746-2	O75746	Calcium-binding mitochondrial carrier protein Aralar1	SLC25A12	SALNVLRDLGIFGLYKGAKACFLRDIPFSAI	482	NaN	NaN	NaN	NaN	NaN	NaN	NaN	20.7542	NaN	NaN	NaN	NaN	NaN	NaN	K	2	___1	1	0.00834468
O75874	O75874	Isocitrate dehydrogenase [NADP] cytoplasmic	IDH1	YLNTFEFMDKLGENLKIKLAQAKL_______	406	NaN	NaN	NaN	22.9906	NaN	21.9256	NaN	21.3105	NaN	NaN	21.8979	22.6749	21.3315	21.8163	K	2	___1	1	0.000721895
O75891;O75891-3;O75891-2	O75891	Cytosolic 10-formyltetrahydrofolate dehydrogenase	ALDH1L1	QVTPLTALKFAELTLKAGIPKGVVNVLPGSG	615	NaN	NaN	NaN	23.2247	22.7536	22.9153	NaN	NaN	NaN	NaN	NaN	NaN	22.9364	22.445	K	2	___1	1	2.03836e-05
O75923;O75923-14;O75923-4;O75923-10;O75923-2;O75923-8;O75923-15;O75923-3;O75923-9;O75923-6;O75923-12;O75923-5;O75923-11;O75923-7;O75923-13	O75923	Dysferlin	DYSF	TPSLSASFNAPLLDTKKQPTGASLVLQVSYT	109	19.2713	NaN	NaN	NaN	NaN	NaN	NaN	20.6706	NaN	NaN	NaN	NaN	NaN	NaN	K	3	___1	1	1.17465e-12
O75923;O75923-14;O75923-4;O75923-10;O75923-2;O75923-8;O75923-15;O75923-3;O75923-9;O75923-6;O75923-12;O75923-5;O75923-11;O75923-7;O75923-13	O75923	Dysferlin	DYSF	KIGETVVDLENRLLSKFGARCGLPQTYCVSG	1673	NaN	NaN	NaN	NaN	NaN	NaN	NaN	21.7692	NaN	NaN	NaN	NaN	NaN	NaN	K	2	___1	1	0.00173849
O75947;O75947-2;F5H608	O75947	ATP synthase subunit d, mitochondrial	ATP5H	YKANVAKAGLVDDFEKKFNALKVPVPEDKYT	72	33.2646	30.1469	31.8677	32.4472	29.1217	33.8178	33.6914	33.8355	32.2322	34.4718	33.1243	32.2889	33.8745	34.1352	K	3	___1	1	4.58369e-87
O75947;O75947-2;F5H608	O75947	ATP synthase subunit d, mitochondrial	ATP5H	KANVAKAGLVDDFEKKFNALKVPVPEDKYTA	73	NaN	NaN	NaN	NaN	NaN	NaN	NaN	NaN	NaN	NaN	23.5919	NaN	26.1505	26.2822	K	2	___1	1	4.58369e-87
O75947	O75947	ATP synthase subunit d, mitochondrial	ATP5H	KAGLVDDFEKKFNALKVPVPEDKYTAQVDAE	78	30.2826	29.9982	30.5234	30.0419	31.9792	31.1069	30.6425	30.9925	31.0094	32.7768	31.5706	32.3501	32.0082	31.7424	K	2	___1	1	3.92457e-35
O75947;O75947-2;F5H608	O75947	ATP synthase subunit d, mitochondrial	ATP5H	NPPAIDWAYYKANVAKAGLVDDFEKKFNALK	63	29.6862	27.798	29.7833	30.1985	31.8391	31.0005	30.515	29.9523	31.0911	30.2072	29.4934	31.4203	30.6225	31.1234	K	3	___1	1	3.53741e-74
O75947	O75947	ATP synthase subunit d, mitochondrial	ATP5H	DKYTAQVDAEEKEDVKSCAEWVSLSKARIVE	99	21.0136	NaN	NaN	NaN	NaN	NaN	NaN	22.6641	NaN	NaN	NaN	NaN	NaN	NaN	K	2	___1	1	8.3714e-06
O75947;O75947-2	O75947	ATP synthase subunit d, mitochondrial	ATP5H	EKEDVKSCAEWVSLSKARIVEYEKEMEKMKN	109	25.4762	NaN	NaN	NaN	NaN	NaN	NaN	25.3323	NaN	24.6692	23.4666	23.7471	24.1442	23.595	K	2	___1	1	8.72307e-23
O75947	O75947	ATP synthase subunit d, mitochondrial	ATP5H	FEKKFNALKVPVPEDKYTAQVDAEEKEDVKS	85	28.9946	25.7417	25.8062	26.9666	27.4521	27.7486	26.5441	28.9978	27.8536	27.1452	27.2585	28.3517	27.9669	28.6438	K	3	___1	1	5.71343e-154
O75947	O75947	ATP synthase subunit d, mitochondrial	ATP5H	PVPEDKYTAQVDAEEKEDVKSCAEWVSLSKA	95	29.1229	29.055	28.8241	28.6053	29.8658	30.47	29.4273	30.3122	28.1334	29.6536	28.9696	29.2268	29.7678	29.5308	K	2	___1	1	2.45177e-30
O75947;O75947-2	O75947	ATP synthase subunit d, mitochondrial	ATP5H	AEWVSLSKARIVEYEKEMEKMKNLIPFDQMT	117	31.1859	29.4844	29.2263	29.4221	30.2383	30.7138	29.5481	31.2424	28.5661	30.758	29.9901	29.9578	30.3363	30.0473	K	2	___1	1	6.41979e-05
O75947;O75947-2;F5H608	O75947	ATP synthase subunit d, mitochondrial	ATP5H	AALPENPPAIDWAYYKANVAKAGLVDDFEKK	58	23.8154	NaN	NaN	NaN	NaN	NaN	NaN	23.4866	NaN	NaN	NaN	NaN	NaN	NaN	K	3	___1	1	1.41225e-15
O75947;O75947-2	O75947	ATP synthase subunit d, mitochondrial	ATP5H	DQMTIEDLNEAFPETKLDKKKYPYWPHQPIE	144	21.5817	NaN	NaN	NaN	NaN	NaN	NaN	22.5441	NaN	27.6757	27.7928	25.9236	23.8153	24.2684	K	3	___1	1	1.20571e-40
O95139;A0A087WZX2;O95139-2	O95139	NADH dehydrogenase [ubiquinone] 1 beta subcomplex subunit 6	NDUFB6	KDQELSPREPVLPPQKMGPMEKFWNKFLENK	39	NaN	NaN	NaN	NaN	NaN	20.7727	22.2075	NaN	NaN	NaN	20.7788	NaN	22.9946	23.5281	K	2	___1	1	0.000805639
O95139;O95139-2	O95139	NADH dehydrogenase [ubiquinone] 1 beta subcomplex subunit 6	NDUFB6	LENKSPWRKMVHGVYKKSIFVFTHVLVPVWI	66	24.9284	20.8114	22.9063	22.49	23.3624	23.9167	22.9274	25.9875	24.2293	25.209	23.9182	23.9067	24.57	24.6142	K	2	___1	1	0.00074374
O95139;A0A087WZX2;O95139-2	O95139	NADH dehydrogenase [ubiquinone] 1 beta subcomplex subunit 6	NDUFB6	_______MTGYTPDEKLRLQQLRELRRRWLK	9	25.5546	22.447	23.7085	22.7581	24.2567	25.2234	23.2153	25.8696	23.5224	25.4719	24.1465	19.3917	25.267	20.8725	K	2	___1	1	0.000147182
O95182	O95182	NADH dehydrogenase [ubiquinone] 1 alpha subcomplex subunit 7	NDUFA7	VSGKPAESSAVAATEKKAVTPAPPIKRWELS	92	22.4602	22.3219	22.5777	22.1743	22.5241	22.6275	21.9247	24.3709	20.9442	22.4726	23.153	21.6112	22.8149	22.7625	K	2	___1	1	3.54217e-38
O95182	O95182	NADH dehydrogenase [ubiquinone] 1 alpha subcomplex subunit 7	NDUFA7	KRTQPPPKLPVGPSHKLSNNYYCTRDGRRES	48	21.6581	NaN	NaN	NaN	NaN	NaN	NaN	22.8571	NaN	NaN	NaN	NaN	NaN	NaN	K	3	___1	1	1.33806e-16
O95183	O95183	Vesicle-associated membrane protein 5	VAMP5	EIMRNNFGKVLERGVKLAELQQRSDQLLDMS	33	NaN	NaN	NaN	21.6072	22.0798	NaN	NaN	NaN	NaN	NaN	21.3015	20.8196	20.2591	NaN	K	2	___1	1	0.00570549
O95197-3;O95197-4;O95197-7;O95197-2;O95197	O95197-3	Reticulon-3	RTN3	HYVGIARDQTKSIVEKIQAKLPGIAKKKAE_	222	NaN	20.9969	NaN	19.9826	NaN	20.2961	NaN	NaN	NaN	NaN	21.3392	21.5383	21.2199	21.0763	K	2	___1	1	0.00219901
O95292;E5RK64;O95292-2	O95292	Vesicle-associated membrane protein-associated protein B/C	VAPB	LKFRGPFTDVVTTNLKLGNPTDRNVCFKVKT	31	NaN	NaN	NaN	NaN	NaN	NaN	NaN	20.9738	NaN	NaN	NaN	NaN	NaN	NaN	K	3	___1	1	0.000158472
O95292	O95292	Vesicle-associated membrane protein-associated protein B/C	VAPB	IVSKSLSSSLDDTEVKKVMEECKRLQGEVQR	167	NaN	NaN	NaN	NaN	21.5445	NaN	NaN	NaN	NaN	NaN	NaN	NaN	NaN	NaN	K	2	___1	1	0.00334052
O95292;E5RK64;O95292-2	O95292	Vesicle-associated membrane protein-associated protein B/C	VAPB	AKVEQVLSLEPQHELKFRGPFTDVVTTNLKL	17	21.8354	NaN	NaN	NaN	NaN	NaN	NaN	22.5365	NaN	NaN	NaN	NaN	NaN	NaN	K	3	___1	1	4.70675e-06
O95298-2;O95298;E9PRJ5	O95298-2	NADH dehydrogenase [ubiquinone] 1 subunit C2	NDUFC2	DFPEEDKKTYGEIFEKFHPIR__________	91	23.2808	NaN	NaN	NaN	NaN	NaN	NaN	21.7559	NaN	NaN	NaN	NaN	NaN	NaN	K	3	___1	1	0.00101189
Q5R3B4;O95563	Q5R3B4	Mitochondrial pyruvate carrier 2	MPC2	AGARGLRATYHRLLDKVELMLPEKLRPLYNH	19	22.6607	NaN	NaN	24.3297	24.9053	25.3568	24.3155	24.1486	NaN	24.2351	24.3826	24.7953	25.1112	25.1338	K	2	___1	1	0.000235373
O95810	O95810	Serum deprivation-response protein	SDPR	ISLEGSVKGIQNDLTKLSKYQASTSNTVSKL	99	NaN	NaN	NaN	21.2706	21.677	NaN	NaN	21.3512	NaN	NaN	20.8612	21.3646	19.0282	20.5366	K	2	___1	1	0.00158275
O95810	O95810	Serum deprivation-response protein	SDPR	EGSVKGIQNDLTKLSKYQASTSNTVSKLLEK	102	NaN	22.5032	21.3798	22.9639	20.9254	NaN	NaN	NaN	20.6674	20.6235	21.9154	NaN	21.5003	20.632	K	2	___1	1	2.79546e-05
O95831-3;O95831;O95831-2	O95831-3	Apoptosis-inducing factor 1, mitochondrial	AIFM1	KARALGTEVIQLFPEKGNMGKILPEYLSNWT	333	20.3323	NaN	NaN	NaN	NaN	NaN	NaN	22.8122	NaN	NaN	NaN	NaN	NaN	NaN	K	3	___1	1	2.69469e-07
P00338;P00338-3;P00338-4	P00338	L-lactate dehydrogenase A chain	LDHA	DLGTDKDKEQWKEVHKQVVESAYEVIKLKGY	232	NaN	NaN	NaN	NaN	NaN	NaN	NaN	21.955	NaN	NaN	NaN	NaN	NaN	NaN	K	3	___1	1	3.31325e-05
P00338;P00338-3;P00338-4	P00338	L-lactate dehydrogenase A chain	LDHA	KEVHKQVVESAYEVIKLKGYTSWAIGLSVAD	243	NaN	NaN	NaN	22.4043	NaN	23.4974	NaN	NaN	NaN	22.346	23.774	NaN	22.3511	22.9085	K	2	___1	1	0.000660102
P00338;P00338-3;P00338-5;P00338-2;F5GXY2;F5GYU2	P00338	L-lactate dehydrogenase A chain	LDHA	QRNVNIFKFIIPNVVKYSPNCKLLIVSNPVD	126	24.9718	NaN	23.9055	26.163	23.3797	26.0563	24.6211	25.3992	22.1443	25.5831	26.1724	NaN	26.6996	24.9327	K	2	___1	1	6.4576e-22
P00338;P00338-3;P00338-5;P00338-2;F5GXY2;F5GYU2	P00338	L-lactate dehydrogenase A chain	LDHA	GESRLNLVQRNVNIFKFIIPNVVKYSPNCKL	118	NaN	25.1583	24.4091	NaN	NaN	NaN	NaN	NaN	NaN	23.1278	27.0372	NaN	25.729	23.7781	K	2	___1	1	2.56427e-29
P00338;P00338-3;P00338-4;P00338-5;P00338-2	P00338	L-lactate dehydrogenase A chain	LDHA	AGVSLKTLHPDLGTDKDKEQWKEVHKQVVES	222	24.7619	20.5999	NaN	22.4044	NaN	22.336	NaN	25.2124	NaN	NaN	21.7271	NaN	20.0605	NaN	K	3	___1	1	3.50426e-05
P00352	P00352	Retinal dehydrogenase 1	ALDH1A1	RIAKEEIFGPVQQIMKFKSLDDVIKRANNTF	410	NaN	NaN	NaN	NaN	NaN	NaN	NaN	NaN	NaN	NaN	23.3122	NaN	20.4172	21.8985	K	2	___1	1	1.82031e-05
P00352	P00352	Retinal dehydrogenase 1	ALDH1A1	DKEQYDKILDLIESGKKEGAKLECGGGPWGN	362	22.3924	NaN	NaN	NaN	NaN	NaN	NaN	21.7099	NaN	NaN	NaN	NaN	NaN	23.5638	K	2	___1	1	0.00388944
P00352	P00352	Retinal dehydrogenase 1	ALDH1A1	MDIDKVAFTGSTEVGKLIKEAAGKSNLKRVT	252	NaN	NaN	NaN	23.8233	23.3101	NaN	21.4855	NaN	NaN	NaN	NaN	NaN	NaN	23.5785	K	2	___1	1	3.48927e-12
P00367;P00367-2;P00367-3;P49448	P00367	Glutamate dehydrogenase 1, mitochondrial;Glutamate dehydrogenase 2, mitochondrial	GLUD1;GLUD2	IWNPDGIDPKELEDFKLQHGSILGFPKAKPY	352	NaN	NaN	NaN	NaN	NaN	NaN	NaN	21.1839	NaN	NaN	NaN	NaN	NaN	NaN	K	3	___1	1	0.000182802
P00367	P00367	Glutamate dehydrogenase 1, mitochondrial	GLUD1	MVEGFFDRGASIVEDKLVEDLRTRESEEQKR	84	23.7955	NaN	24.66	24.0807	24.4179	25.0412	23.1605	24.2876	22.9701	25.5612	23.9577	24.9739	25.0837	24.5482	K	2	___1	1	8.12445e-25
P00367;P00367-2;P00367-3;P49448	P00367	Glutamate dehydrogenase 1, mitochondrial;Glutamate dehydrogenase 2, mitochondrial	GLUD1;GLUD2	IIAEGANGPTTPEADKIFLERNIMVIPDLYL	415	NaN	NaN	NaN	NaN	NaN	23.3174	NaN	NaN	NaN	NaN	NaN	NaN	21.7294	21.796	K	3	___1	1	9.18469e-15
P00367;P00367-2;P00367-3	P00367	Glutamate dehydrogenase 1, mitochondrial	GLUD1	VPTAEFQDRISGASEKDIVHSGLAYTMERSA	503	22.6939	NaN	NaN	NaN	21.875	NaN	NaN	22.6928	NaN	21.9515	NaN	21.4537	20.3685	22.0581	K	3	___1	1	5.5245e-06
P00367;P00367-2;P00367-3;P49448	P00367	Glutamate dehydrogenase 1, mitochondrial;Glutamate dehydrogenase 2, mitochondrial	GLUD1;GLUD2	YTMERSARQIMRTAMKYNLGLDLRTAAYVNA	527	22.7495	NaN	NaN	NaN	22.185	NaN	21.6794	24.2116	NaN	26.5456	22.3519	NaN	22.7111	23.3181	K	2	___1	1	1.32114e-05
P00387-2;P00387;P00387-3;B1AHF3	P00387-2	NADH-cytochrome b5 reductase 3;NADH-cytochrome b5 reductase 3 membrane-bound form;NADH-cytochrome b5 reductase 3 soluble form	CYB5R3	FQRSTPAITLESPDIKYPLRLIDREIISHDT	19	NaN	NaN	NaN	NaN	NaN	22.7975	NaN	NaN	NaN	24.4668	24.1521	NaN	23.2539	22.7266	K	2	___1	1	4.85641e-63
P00390-2;P00390-3;P00390	P00390-2	Glutathione reductase, mitochondrial	GSR	WAIGRVPNTKDLSLNKLGIQTDDKGHIIVDE	303	NaN	NaN	NaN	NaN	NaN	NaN	NaN	21.4679	NaN	NaN	NaN	21.9383	21.0317	NaN	K	2	___1	1	3.35916e-16
P00390-2;P00390-3;P00390;P00390-5;P00390-4	P00390-2	Glutathione reductase, mitochondrial	GSR	KTYSTSFTPMYHAVTKRKTKCVMKMVCANKE	413	NaN	NaN	NaN	NaN	21.4598	NaN	NaN	22.1879	NaN	23.1279	NaN	NaN	NaN	NaN	K	3	___1	1	1.63283e-05
P00441;H7BYH4	P00441	Superoxide dismutase [Cu-Zn]	SOD1	SGDHCIIGRTLVVHEKADDLGKGGNEESTKT	123	25.0717	23.9088	24.2315	25.1127	25.745	25.0011	24.3644	27.8758	21.257	25.1359	24.969	25.2521	24.3932	24.8975	K	2	___1	1	9.95149e-29
P00505	P00505	Aspartate aminotransferase, mitochondrial	GOT2	YVLPSVRKAEAQIAAKNLDKEYLPIGGLAEF	90	24.6152	NaN	NaN	NaN	NaN	21.3499	19.8791	NaN	20.8011	NaN	NaN	22.0014	21.2115	21.8814	K	2	___1	1	4.87251e-12
P00505	P00505	Aspartate aminotransferase, mitochondrial	GOT2	SVRKAEAQIAAKNLDKEYLPIGGLAEFCKAS	94	21.3117	NaN	NaN	NaN	NaN	NaN	NaN	22.9596	NaN	NaN	NaN	NaN	NaN	NaN	K	2	___1	1	2.27295e-41
P00505	P00505	Aspartate aminotransferase, mitochondrial	GOT2	KASAELALGENSEVLKSGRFVTVQTISGTGA	122	25.9387	23.9791	25.5635	26.1409	28.0857	28.3848	27.9229	26.8235	26.8516	28.5865	26.8341	25.2978	27.4445	28.4731	K	2	___1	1	8.57282e-240
P00505;P00505-2	P00505	Aspartate aminotransferase, mitochondrial	GOT2	RVGAFTMVCKDADEAKRVESQLKILIRPMYS	302	23.6745	23.1672	24.7679	24.5425	25.1717	26.1194	25.8829	25.6969	22.0563	25.2514	24.0411	24.5108	25.2178	25.0147	K	2	___1	1	3.59727e-41
P00505;P00505-2	P00505	Aspartate aminotransferase, mitochondrial	GOT2	EQVERLIKEFSIYMTKDGRISVAGVTSSNVG	404	28.1892	27.2741	26.7822	26.658	28.5568	27.9415	25.8378	29.6063	28.1081	29.0424	27.6054	28.0486	28.1098	28.959	K	2	___1	1	4.91428e-19
P00505;P00505-2	P00505	Aspartate aminotransferase, mitochondrial	GOT2	VDPRPEQWKEIATVVKKRNLFAFFDMAYQGF	234	28.9301	24.9831	30.0128	29.3837	29.8937	30.2147	26.9103	30.4726	28.4205	30.6568	29.7128	30.0458	30.1244	30.3273	K	2	___1	1	0.00269026
P00505	P00505	Aspartate aminotransferase, mitochondrial	GOT2	YRDDNGKPYVLPSVRKAEAQIAAKNLDKEYL	82	22.8497	NaN	NaN	NaN	NaN	NaN	NaN	20.8715	NaN	NaN	20.0764	NaN	NaN	NaN	K	2	___1	1	0.00104377
P00505;P00505-2	P00505	Aspartate aminotransferase, mitochondrial	GOT2	CAHNPTGVDPRPEQWKEIATVVKKRNLFAFF	227	20.2255	NaN	NaN	NaN	NaN	NaN	NaN	22.3136	NaN	NaN	NaN	21.2289	21.4145	22.8771	K	2	___1	1	3.7439e-14
P00505;P00505-2	P00505	Aspartate aminotransferase, mitochondrial	GOT2	ADRIIGMRTQLVSNLKKEGSTHNWQHITDQI	363	32.6261	31.3547	30.5124	32.3378	31.7435	33.3065	29.2804	33.1618	31.5155	33.5243	32.8389	33.1988	33.1762	33.341	K	2	___1	1	2.31198e-22
P00505;P00505-2	P00505	Aspartate aminotransferase, mitochondrial	GOT2	VCKDADEAKRVESQLKILIRPMYSNPPLNGA	309	28.9858	28.5264	30.9495	31.1276	32.5863	33.0904	31.4779	30.7777	30.2482	31.2169	32.1665	28.0592	32.3739	30.8333	K	3	___1	1	1.58425e-68
P00505;P00505-2	P00505	Aspartate aminotransferase, mitochondrial	GOT2	MGLYGERVGAFTMVCKDADEAKRVESQLKIL	296	25.5372	23.2996	23.4532	22.8501	23.8436	24.5157	22.3312	25.9512	25.5574	25.8785	24.9431	26.207	25.7291	26.6803	K	2	___1	1	3.59727e-41
P00558;P00558-2	P00558	Phosphoglycerate kinase 1	PGK1	QITNNQRIKAAVPSIKFCLDNGAKSVVLMSH	48	23.8212	NaN	25.9366	27.829	25.2224	27.7717	25.5693	25.7667	22.9626	28.7664	29.0736	NaN	NaN	25.2316	K	3	___1	1	1.23288e-12
P00558;P00558-2	P00558	Phosphoglycerate kinase 1	PGK1	KGKDASGNKVKAEPAKIEAFRASLSKLGDVY	146	26.3474	22.8454	26.4756	27.5057	26.5173	27.1261	26.0388	26.7278	26.2099	25.8799	26.0036	23.8631	26.1602	27.3969	K	2	___1	1	0.00386037
P00558;P00558-2	P00558	Phosphoglycerate kinase 1	PGK1	MVGVNLPQKAGGFLMKKELNYFAKALESPER	191	26.9185	26.5719	26.1244	26.0722	26.4287	26.9733	26.9604	27.5735	24.0161	26.6125	27.4012	25.629	26.3791	27.4263	K	2	___1	1	0.00212824
P00558;P00558-2	P00558	Phosphoglycerate kinase 1	PGK1	EAFARGTKALMDEVVKATSRGCITIIGGGDT	361	24.815	21.7423	25.9865	26.5454	25.4374	26.9617	25.8857	25.827	23.4568	26.5535	26.6175	24.458	26.0091	26.8952	K	2	___1	1	4.63048e-30
P00558;P00558-2;P07205	P00558;P07205	Phosphoglycerate kinase 1;Phosphoglycerate kinase 2	PGK1;PGK2	KAEPAKIEAFRASLSKLGDVYVNDAFGTAHR;KAEPDKIEAFRASLSKLGDVYVNDAFGTAHR	156	26.366	24.4277	NaN	25.047	24.0996	24.5156	NaN	26.4136	21.8196	25.6299	25.4322	21.4158	22.9687	23.9294	K	3	___1	1	1.28695e-41
P00558;P00558-2	P00558	Phosphoglycerate kinase 1	PGK1	KDVLFLKDCVGPEVEKACANPAAGSVILLEN	106	23.033	NaN	NaN	NaN	NaN	NaN	NaN	20.4108	NaN	NaN	NaN	NaN	NaN	NaN	K	3	___1	1	4.01415e-34
P00558;P00558-2	P00558	Phosphoglycerate kinase 1	PGK1	LFDEEGAKIVKDLMSKAEKNGVKITLPVDFV	272	21.2406	19.6119	20.5348	21.9112	NaN	NaN	NaN	22.6344	NaN	NaN	NaN	NaN	NaN	NaN	K	2	___1	1	0.00362674
P00558;P00558-2	P00558	Phosphoglycerate kinase 1	PGK1	NGVKITLPVDFVTADKFDENAKTGQATVASG	291	25.2564	23.802	25.9031	26.6736	26.0714	26.0839	25.1847	27.6986	24.3439	26.9963	27.8368	24.3467	24.9621	26.1149	K	2	___1	1	4.569e-73
P00558	P00558	Phosphoglycerate kinase 1	PGK1	_____MSLSNKLTLDKLDVKGKRVVMRVDFN	11	24.9869	23.7756	24.09	25.8419	NaN	NaN	23.9786	25.3783	24.9376	24.0802	24.3754	24.4591	24.211	23.6204	K	2	___1	1	0.0041467
P00558;P00558-2	P00558	Phosphoglycerate kinase 1	PGK1	LMSHLGRPDGVPMPDKYSLEPVAVELKSLLG	75	26.3664	24.8552	NaN	NaN	NaN	NaN	NaN	26.3465	NaN	NaN	25.3462	24.3129	NaN	NaN	K	4	___1	1	5.61583e-90
P00558;P00558-2	P00558	Phosphoglycerate kinase 1	PGK1	PMPDKYSLEPVAVELKSLLGKDVLFLKDCVG	86	NaN	NaN	NaN	NaN	NaN	NaN	NaN	NaN	NaN	NaN	25.9969	NaN	NaN	NaN	K	3	___1	1	3.42514e-05
P00558;P00558-2	P00558	Phosphoglycerate kinase 1	PGK1	ERPFLAILGGAKVADKIQLINNMLDKVNEMI	220	24.4605	23.6166	26.3099	28.0854	26.7212	26.6213	27.61	25.5974	25.1565	22.4437	27.7475	26.0902	26.1238	26.9779	K	2	___1	1	2.49803e-19
P00558	P00558	Phosphoglycerate kinase 1	PGK1	KGKRVVMRVDFNVPMKNNQITNNQRIKAAVP	30	23.7851	24.7621	24.2336	25.2676	24.9425	24.8192	22.9767	25.3176	24.9536	23.8193	25.258	25.0725	24.2871	25.2001	K	3	___1	1	8.19487e-14
P00568;Q5T9B7;H0Y4J6	P00568	Adenylate kinase isoenzyme 1	AK1	ETYYKATEPVIAFYEKRGIVRKVNAEGSVDS	166	26.0695	26.8504	28.1317	28.1256	27.921	27.5743	27.8607	27.1516	26.7369	28.4911	29.019	28.0752	27.7345	28.4973	K	3	___1	1	4.07201e-74
P00568;Q5T9B7	P00568	Adenylate kinase isoenzyme 1	AK1	FVVGGPGSGKGTQCEKIVQKYGYTHLSTGDL	27	23.9484	NaN	24.2807	24.4876	NaN	20.5775	20.9962	25.1558	22.485	22.5407	23.7594	NaN	23.0376	24.158	K	2	___1	1	3.73235e-05
P00568;Q5T9B7	P00568	Adenylate kinase isoenzyme 1	AK1	GPGSGKGTQCEKIVQKYGYTHLSTGDLLRSE	31	26.2061	23.9471	23.5975	24.7392	25.2129	NaN	NaN	26.9394	NaN	23.9929	24.3583	24.1077	24.2043	23.666	K	3	___1	1	6.38836e-12
P00568;Q5T9B7;H0Y4J6	P00568	Adenylate kinase isoenzyme 1	AK1	DDNEETIKKRLETYYKATEPVIAFYEKRGIV	155	NaN	NaN	NaN	22.1067	NaN	NaN	NaN	NaN	NaN	NaN	NaN	NaN	NaN	NaN	K	2	___1	1	6.33234e-34
P00568;Q5T9B7;H0Y4J6	P00568	Adenylate kinase isoenzyme 1	AK1	RGETSGRVDDNEETIKKRLETYYKATEPVIA	147	NaN	22.8224	23.3137	24.0039	19.9676	22.0983	22.7118	25.0114	18.9543	21.755	23.1204	21.9972	22.4094	22.3928	K	2	___1	1	0.00013623
P00738;A0A0C4DGL8;J3QLC9;J3QR68;H0Y300;P00738-2;A0A087WU08	P00738	Haptoglobin;Haptoglobin alpha chain;Haptoglobin beta chain	HP	QDQCIRHYEGSTVPEKKTPKSPVGVQPILNE	321	NaN	NaN	20.1284	19.6706	20.0641	NaN	NaN	NaN	NaN	NaN	NaN	NaN	20.1145	NaN	K	2	___1	1	0.000770732
P00738;A0A0C4DGL8;J3QLC9;J3QR68;H0Y300;P00738-2;A0A087WU08;H3BS21	P00738	Haptoglobin;Haptoglobin alpha chain;Haptoglobin beta chain	HP	GRVGYVSGWGRNANFKFTDHLKYVMLPVADQ	291	NaN	NaN	21.543	20.6341	21.7818	20.694	NaN	NaN	NaN	NaN	NaN	NaN	23.2226	23.1297	K	2	___1	1	2.54077e-05
P00738;A0A0C4DGL8;J3QLC9;J3QR68;H0Y300;P00739;P00739-2;J3KRH2;J3KTC3	P00738	Haptoglobin;Haptoglobin alpha chain;Haptoglobin beta chain;Haptoglobin-related protein	HP;HPR	YKLRTEGDGVYTLNDKKQWINKAVGDKLPEC	71	NaN	NaN	NaN	NaN	21.1692	NaN	NaN	NaN	NaN	NaN	NaN	21.8464	21.5966	NaN	K	2	___1	1	0.000773163
P00915;E5RHP7;E5RH81;E5RIF9;E5RG43;E5RGU8;E5RFL2;E5RII2	P00915	Carbonic anhydrase 1	CA1	PVDIKTSETKHDTSLKPISVSYNPATAKEII	46	27.5146	NaN	NaN	NaN	NaN	NaN	NaN	26.8288	NaN	NaN	NaN	NaN	NaN	NaN	K	3	___1	1	6.48595e-07
P00915;E5RHP7;E5RH81;H0YBE2;E5RIF9;E5RG43;E5RGU8;E5RFL2	P00915	Carbonic anhydrase 1	CA1	SFHVNFEDNDNRSVLKGGPFSDSYRLFQFHF	81	NaN	NaN	NaN	NaN	NaN	NaN	NaN	NaN	NaN	NaN	21.0164	NaN	21.0281	21.085	K	2	___1	1	0.00354259
P00915;E5RHP7;E5RH81;E5RFE7;H0YBE2;E5RJI8;E5RJF6	P00915	Carbonic anhydrase 1	CA1	LAVIGVLMKVGEANPKLQKVLDALQAIKTKG	157	25.8187	NaN	23.5247	25.2717	22.8713	23.7452	NaN	24.8141	22.978	22.3817	24.2426	23.4701	23.7035	22.8278	K	2	___1	1	0.00014998
P00915;E5RHP7;E5RH81;E5RFE7;H0YBE2;E5RJI8;E5RJF6	P00915	Carbonic anhydrase 1	CA1	ANPKLQKVLDALQAIKTKGKRAPFTNFDPST	169	26.2078	23.1627	27.296	27.7005	26.5846	27.1646	25.9737	25.3338	24.5774	26.4827	27.91	28.0794	27.3117	27.1409	K	2	___1	1	7.0049e-07
P00918	P00918	Carbonic anhydrase 2	CA2	AFNVEFDDSQDKAVLKGGPLDGTYRLIQFHF	80	NaN	NaN	NaN	NaN	NaN	NaN	NaN	NaN	NaN	NaN	NaN	20.5855	NaN	20.0294	K	2	___1	1	0.00758106
P00918	P00918	Carbonic anhydrase 2	CA2	IVLKEPISVSSEQVLKFRKLNFNGEGEPEEL	224	NaN	NaN	22.2562	NaN	NaN	22.5889	NaN	20.2858	NaN	NaN	NaN	NaN	NaN	NaN	K	2	___1	1	2.72806e-05
P00918	P00918	Carbonic anhydrase 2	CA2	AKPGLQKVVDVLDSIKTKGKSADFTNFDPRG	167	NaN	NaN	22.5637	23.7568	23.3917	23.5167	22.0919	22.1548	NaN	21.5277	23.5217	23.4072	23.2103	24.3826	K	2	___1	1	0.000558489
P01008;CON__P41361	P01008	Antithrombin-III	SERPINC1	LVLVNTIYFKGLWKSKFSPENTRKELFYKAD	260	21.6263	22.1272	22.3386	22.4869	NaN	NaN	NaN	22.6944	NaN	20.1069	21.7183	20.9083	21.8059	21.4607	K	2	___1	1	0.00221738
P01024;M0R0Q9	P01024	Complement C3;Complement C3 beta chain;C3-beta-c;Complement C3 alpha chain;C3a anaphylatoxin;Acylation stimulating protein;Complement C3b alpha' chain;Complement C3c alpha' chain fragment 1;Complement C3dg fragment;Complement C3g fragment;Complement C3d fragment;Complement C3f fragment;Complement C3c alpha' chain fragment 2	C3	YALAQMGRLKGPLLNKFLTTAKDKNRWEDPG	1209	NaN	NaN	24.0276	23.9414	23.3041	22.7067	NaN	NaN	NaN	NaN	23.2453	NaN	NaN	22.2953	K	2	___1	1	0.000636823
P01570;P01567	P01570	Interferon alpha-14;Interferon alpha-7	IFNA14;IFNA7	AVKKYFQRITLYLMEKKYSPCAWEVVRAEIM	157	22.5682	NaN	NaN	NaN	NaN	NaN	NaN	NaN	NaN	NaN	NaN	NaN	NaN	NaN	K	2	___1	1	0.006886
P02042;E9PFT6	P02042	Hemoglobin subunit delta	HBD	NLKGTFSQLSELHCDKLHVDPENFRLLGNVL	96	24.9817	NaN	NaN	NaN	NaN	NaN	NaN	22.5205	NaN	NaN	NaN	NaN	NaN	NaN	K	4	___1	1	8.95333e-18
P02042;P68871	P02042;P68871	Hemoglobin subunit delta;Hemoglobin subunit beta;LVV-hemorphin-7;Spinorphin	HBD;HBB	AYQKVVAGVANALAHKYH_____________	145	34.327	29.2025	30.645	30.8759	32.0859	30.4945	29.6668	33.3492	29.335	30.3841	32.3339	32.3594	31.4171	31.4679	K	2	___1	1	2.79144e-83
P02144;B0QYF8;F2Z2F1;Q8WVH6	P02144	Myoglobin	MB	HLKSEDEMKASEDLKKHGATVLTALGGILKK	64	21.5317	NaN	NaN	NaN	NaN	NaN	NaN	NaN	NaN	NaN	NaN	NaN	NaN	NaN	K	2	___1	1	0.000149675
P02144;Q8WVH6	P02144	Myoglobin	MB	NKALELFRKDMASNYKELGFQG_________	148	23.3399	23.7854	23.5359	26.364	25.9649	25.8341	24.5614	24.0701	24.6073	25.3068	25.9971	23.226	24.1148	NaN	K	2	___1	1	8.20882e-11
P02511;E9PR44;A0A024R3B9;H0YCW8	P02511	Alpha-crystallin B chain	CRYAB	QVSGPERTIPITREEKPAVTAAPKK______	166	27.1268	22.3751	20.5067	21.4913	25.7655	26.6498	26.161	27.6	24.9255	26.2284	27.2194	23.5436	27.0362	26.8572	K	3	___1	1	0.00181772
P02511;E9PR44;A0A024R3B9;E9PNH7;E9PJL7;E9PRA8	P02511	Alpha-crystallin B chain	CRYAB	FSVNLDVKHFSPEELKVKVLGDVIEVHGKHE	90	26.5375	23.4017	23.7069	24.3848	25.7034	24.2537	23.8873	26.6769	21.2106	24.7962	24.7061	24.0411	25.157	25.1496	K	2	___1	1	1.05896e-16
P02545;P02545-6;P02545-3;P02545-2;Q3BDU5;P02545-5;P02545-4;Q5TCI8;H0YAB0	P02545	Prelamin-A/C;Lamin-A/C	LMNA	LQELRAQHEDQVEQYKKELEKTYSAKLDNAR	260	21.8197	NaN	NaN	NaN	NaN	NaN	NaN	22.1124	NaN	NaN	NaN	NaN	NaN	NaN	K	3	___1	1	0.00265525
P02545;P02545-6;P02545-3;P02545-2;Q3BDU5;P02545-5;P02545-4;Q5TCI8;H0YAB0	P02545	Prelamin-A/C;Lamin-A/C	LMNA	LLNSKEAALSTALSEKRTLEGELHDLRGQVA	155	NaN	NaN	23.7284	25.0292	24.4819	25.1611	25.108	24.5902	23.0791	22.9653	24.5792	23.0423	NaN	NaN	K	2	___1	1	3.13972e-06
P02545;P02545-6;P02545-3;P02545-2;Q3BDU5;P02545-5;P02545-4;Q5TCI8	P02545	Prelamin-A/C;Lamin-A/C	LMNA	AQHEDQVEQYKKELEKTYSAKLDNARQSAER	265	NaN	NaN	20.5964	21.9825	21.3455	21.722	22.1614	21.4407	20.2583	NaN	21.5137	20.0826	21.6069	21.1315	K	2	___1	1	0.00468621
P02545;P02545-6;P02545-3;P02545-2;Q3BDU5;P02545-5;P02545-4;Q5TCI8	P02545	Prelamin-A/C;Lamin-A/C	LMNA	QVEQYKKELEKTYSAKLDNARQSAERNSNLV	270	22.9026	25.082	23.7667	25.1233	24.0184	24.5056	23.5462	24.4672	23.4244	23.6612	24.8773	23.9872	24.9395	24.073	K	2	___1	1	5.61369e-05
P02545;P02545-6;P02545-3;P02545-2;Q3BDU5;P02545-5;P02545-4;Q5TCI8;H0YAB0	P02545	Prelamin-A/C;Lamin-A/C	LMNA	RTLEGELHDLRGQVAKLEAALGEAKKQLQDE	171	21.7089	21.5567	NaN	22.1898	22.0407	22.0307	NaN	20.9308	21.464	21.2865	NaN	21.3148	21.5217	22.0467	K	2	___1	1	0.000241295
P02545;P02545-6;P02545-3;P02545-2;Q3BDU5;P02545-5;P02545-4;Q5TCI8	P02545	Prelamin-A/C;Lamin-A/C	LMNA	RIRIDSLSAQLSQLQKQLAAKEAKLRDLEDS	311	23.7816	NaN	23.2498	23.6722	23.2006	NaN	NaN	22.35	NaN	NaN	22.8327	NaN	23.5082	NaN	K	3	___1	1	1.00405e-42
P02545;P02545-6;P02545-3;P02545-2;Q3BDU5	P02545	Prelamin-A/C;Lamin-A/C	LMNA	DSVAKERARLQLELSKVREEFKELKARNTKK	108	21.9348	NaN	22.7974	24.3222	23.5517	22.936	23.4893	22.3213	NaN	NaN	NaN	NaN	NaN	NaN	K	2	___1	1	0.000637031
P02549-2;P02549	P02549-2	Spectrin alpha chain, erythrocytic 1	SPTA1	AVMSDKVKELCAKAEKLTLSHPSDAPQIQEM	329	NaN	NaN	22.5127	22.8998	NaN	22.1722	NaN	22.265	NaN	NaN	NaN	NaN	NaN	NaN	K	3	___1	1	3.76835e-10
P02549-2;P02549	P02549-2	Spectrin alpha chain, erythrocytic 1	SPTA1	SQDYGRDLQGVQNLLKKHKRLEGELVAHEPA	1753	NaN	NaN	NaN	NaN	NaN	NaN	NaN	20.3045	NaN	NaN	NaN	NaN	NaN	NaN	K	2	___1	1	0.00558903
P02549-2;P02549	P02549-2	Spectrin alpha chain, erythrocytic 1	SPTA1	QLLEASAVHRQKLLEKQLPLQKAEDLFVEFA	2031	NaN	NaN	NaN	20.0816	20.733	NaN	NaN	NaN	NaN	NaN	NaN	NaN	NaN	21.2124	K	2	___1	1	4.24227e-05
P02647;F8W696	P02647	Apolipoprotein A-I;Proapolipoprotein A-I;Truncated apolipoprotein A-I	APOA1	EYHAKATEHLSTLSEKAKPALEDLRQGLLPV	230	25.2457	NaN	25.4207	25.5615	25.535	24.4646	24.034	24.5548	23.9324	24.0365	25.1914	23.7044	24.36	25.8125	K	2	___1	1	1.7332e-54
P02647;F8W696	P02647	Apolipoprotein A-I;Proapolipoprotein A-I;Truncated apolipoprotein A-I	APOA1	ELQEGARQKLHELQEKLSPLGEEMRDRARAH	164	22.2733	NaN	NaN	NaN	NaN	NaN	NaN	21.2913	NaN	NaN	NaN	NaN	NaN	NaN	K	3	___1	1	4.58158e-06
P02647;F8W696	P02647	Apolipoprotein A-I;Proapolipoprotein A-I;Truncated apolipoprotein A-I	APOA1	KVEPLRAELQEGARQKLHELQEKLSPLGEEM	157	22.736	NaN	NaN	NaN	NaN	NaN	NaN	20.2477	NaN	NaN	NaN	NaN	NaN	NaN	K	2	___1	1	0.000103143
P02647;F8W696	P02647	Apolipoprotein A-I;Proapolipoprotein A-I;Truncated apolipoprotein A-I	APOA1	EEVKAKVQPYLDDFQKKWQEEMELYRQKVEP	130	22.3795	NaN	21.2844	22.6556	22.9837	21.7839	NaN	21.6585	NaN	20.664	22.438	22.6558	22.6585	23.036	K	2	___1	1	0.00243298
P02647;F8W696	P02647	Apolipoprotein A-I;Proapolipoprotein A-I;Truncated apolipoprotein A-I	APOA1	ESFKVSFLSALEEYTKKLNTQ__________	262	NaN	NaN	NaN	NaN	NaN	NaN	NaN	NaN	NaN	NaN	NaN	22.3284	NaN	NaN	K	2	___1	1	0.000230143
V9GYG9;V9GYM3;P02652;V9GYE3	V9GYG9	Apolipoprotein A-II;Proapolipoprotein A-II;Truncated apolipoprotein A-II	APOA2	KSYFEKSKEQLTPLIKKAGTELVNFLSYFVE	77	24.8641	24.1934	24.6199	26.3152	24.9809	24.4373	NaN	23.8262	24.6741	21.9817	24.5882	26.172	25.7783	26.0941	K	2	___1	1	0.0044189
P02671-2;P02671	P02671-2	Fibrinogen alpha chain;Fibrinopeptide A;Fibrinogen alpha chain	FGA	SGNVSPGTRREYHTEKLVTSKGDKELRTGKE	432	NaN	NaN	NaN	NaN	NaN	NaN	NaN	22.794	NaN	NaN	NaN	NaN	NaN	NaN	K	3	___1	1	0.00103569
P02671-2;P02671;A0A087WUA0	P02671-2	Fibrinogen alpha chain;Fibrinopeptide A;Fibrinogen alpha chain	FGA	DLRSRIEVLKRKVIEKVQHIQLLQKNVRAQL	148	NaN	NaN	19.7972	20.7131	20.513	NaN	NaN	22.6152	NaN	NaN	NaN	NaN	NaN	NaN	K	3	___1	1	2.33304e-05
P02675;D6REL8	P02675	Fibrinogen beta chain;Fibrinopeptide B;Fibrinogen beta chain	FGB	FTVQNEANKYQISVNKYRGTAGNALMDGASQ	374	NaN	NaN	NaN	NaN	NaN	NaN	NaN	NaN	NaN	NaN	21.7908	NaN	20.9523	21.5514	K	2	___1	1	0.00468621
P02765;C9JV77	P02765	Alpha-2-HS-glycoprotein;Alpha-2-HS-glycoprotein chain A;Alpha-2-HS-glycoprotein chain B	AHSG	AVEGDCDFQLLKLDGKFSVVYAKCDSSPDSA	124	NaN	NaN	NaN	22.1828	22.079	NaN	NaN	NaN	NaN	NaN	22.8138	NaN	NaN	NaN	K	2	___1	1	0.00382067
P02787	P02787	Serotransferrin	TF	ETKDLLFRDDTVCLAKLHDRNTYEKYLGEEY	659	22.4955	NaN	NaN	NaN	NaN	NaN	NaN	22.7633	NaN	NaN	NaN	NaN	NaN	NaN	K	3	___1	1	7.64e-05
P02787;C9JVG0	P02787	Serotransferrin	TF	AFKCLKDGAGDVAFVKHSTIFENLANKADRD	225	24.5176	NaN	NaN	NaN	NaN	NaN	NaN	21.9429	NaN	NaN	NaN	NaN	NaN	NaN	K	3	___1	1	1.84336e-32
P02787	P02787	Serotransferrin	TF	EFQLFSSPHGKDLLFKDSAHGFLKVPPRMDA	315	25.1338	NaN	NaN	NaN	NaN	NaN	NaN	25.2391	NaN	NaN	NaN	NaN	NaN	NaN	K	2	___1	1	2.65879e-05
P02787	P02787	Serotransferrin	TF	HGKDLLFKDSAHGFLKVPPRMDAKMYLGYEY	323	22.8322	NaN	21.5461	21.735	22.7058	21.6236	NaN	23.2284	NaN	21.2129	22.2999	NaN	22.8343	23.532	K	3	___1	1	0.00268386
P02787	P02787	Serotransferrin	TF	NHAVVTRKDKEACVHKILRQQQHLFGSNVTD	618	24.2271	NaN	NaN	NaN	NaN	NaN	NaN	23.4148	NaN	NaN	NaN	NaN	NaN	NaN	K	2	___1	1	0.00357617
P02787	P02787	Serotransferrin	TF	SKEDPQTFYYAVAVVKKDSGFQMNQLRGKKS	121	NaN	NaN	NaN	NaN	NaN	NaN	NaN	21.6347	NaN	NaN	NaN	NaN	NaN	NaN	K	3	___1	1	0.000503324
P02787	P02787	Serotransferrin	TF	GAFRCLVEKGDVAFVKHQTVPQNTGGKNPDP	553	24.2007	NaN	NaN	NaN	NaN	NaN	NaN	23.518	NaN	NaN	21.0378	22.6945	20.5839	23.0257	K	3	___1	1	7.73038e-17
P02787	P02787	Serotransferrin	TF	ELLCLDNTRKPVDEYKDCHLAQVPSHTVVAR	258	23.3239	NaN	NaN	NaN	NaN	NaN	NaN	22.2944	NaN	NaN	NaN	NaN	NaN	NaN	K	4	___1	0.999453	2.84479e-20
P02787	P02787	Serotransferrin	TF	DTVCLAKLHDRNTYEKYLGEEYVKAVGNLRK	668	22.3166	NaN	NaN	NaN	NaN	NaN	NaN	21.5462	NaN	NaN	NaN	NaN	NaN	NaN	K	2	___1	1	8.3834e-09
P02787;C9JB55;F8WCI6;F8WEK9	P02787	Serotransferrin	TF	MKSVIPSDGPSVACVKKASYLDCIRAIAANE	60	22.9818	NaN	NaN	21.5498	20.6439	NaN	NaN	22.2844	NaN	NaN	NaN	NaN	NaN	23.2588	K	2	___1	1	0.000112431
P02794;G3V192;E9PRK8;E9PKY7	P02794	Ferritin heavy chain;Ferritin heavy chain, N-terminally processed;Ferritin	FTH1	KYFLHQSHEEREHAEKLMKLQNQRGGRIFLQ	69	23.5026	22.8797	20.8455	21.1959	21.2579	NaN	20.7697	23.7937	NaN	NaN	NaN	NaN	NaN	NaN	K	2	___1	1	0.0017146
P02794;G3V192;E9PRK8;E9PKY7	P02794	Ferritin heavy chain;Ferritin heavy chain, N-terminally processed;Ferritin	FTH1	LHQSHEEREHAEKLMKLQNQRGGRIFLQDIK	72	21.9425	23.0922	21.9864	22.1384	22.5247	21.4186	20.4064	23.6246	NaN	21.1714	21.7789	26.0354	22.5112	21.2895	K	2	___1	1	0.00147772
P02794;G3V192;G3V1D1;E9PPQ4	P02794	Ferritin heavy chain;Ferritin heavy chain, N-terminally processed;Ferritin	FTH1	LHLEKNVNQSLLELHKLATDKNDPHLCDFIE	120	23.8868	NaN	NaN	NaN	NaN	NaN	NaN	21.156	NaN	NaN	NaN	NaN	NaN	NaN	K	3	___1	1	0.00153286
P03928	P03928	ATP synthase protein 8	MT-ATP8	QLKMLNTNYHLPPSPKPMKMKNYNKPWEPKW	40	25.793	24.2446	25.8291	25.1231	26.1542	27.2082	25.6919	26.7873	25.4061	27.8586	25.2318	26.1441	27.3311	27.391	K	3	___1	1	1.56977e-06
P04040	P04040	Catalase	CAT	ENIAGHLKDAQIFIQKKAVKNFTEVHPDYGS	476	23.9579	24.3458	25.4633	24.3384	24.8738	23.926	25.5763	23.8521	NaN	25.5132	24.7792	25.183	26.0806	22.79	K	2	___1	1	0.00327891
P04040	P04040	Catalase	CAT	FIRDPILFPSFIHSQKRNPQTHLKDPDMVWD	169	24.1479	NaN	NaN	NaN	NaN	NaN	NaN	23.7013	NaN	NaN	NaN	NaN	NaN	NaN	K	3	___1	1	3.6889e-05
P04075;J3KPS3;P04075-2;H3BQN4;H3BR68	P04075	Fructose-bisphosphate aldolase A;Fructose-bisphosphate aldolase	ALDOA	GGKKENLKAAQEEYVKRALANSLACQGKYTP	330	26.1758	26.7138	26.6424	27.3323	25.421	26.0844	25.9688	27.3103	24.4664	26.6218	27.2536	27.7362	26.4593	26.9164	K	2	___1	1	0.000323596
P04075;J3KPS3;P04075-2;H3BQN4;H3BPS8;H3BUH7;H3BR04;H3BMQ8;H3BU78	P04075	Fructose-bisphosphate aldolase A;Fructose-bisphosphate aldolase	ALDOA	LYQKADDGRPFPQVIKSKGGVVGIKVDKGVV	99	29.4803	27.6129	27.5768	27.8078	28.9758	27.2626	25.6321	27.6668	27.9114	27.7075	28.2551	27.6655	27.5345	28.4272	K	2	___1	1	9.24805e-17
P04075;J3KPS3;P04075-2;H3BQN4;H3BR68	P04075	Fructose-bisphosphate aldolase A;Fructose-bisphosphate aldolase	ALDOA	ALTFSYGRALQASALKAWGGKKENLKAAQEE	312	20.7308	NaN	NaN	NaN	NaN	NaN	NaN	20.7062	NaN	NaN	NaN	NaN	NaN	NaN	K	2	___1	1	0.00450932
P04075;J3KPS3;P04075-2;H3BQN4;H3BU78	P04075	Fructose-bisphosphate aldolase A;Fructose-bisphosphate aldolase	ALDOA	KALSDHHIYLEGTLLKPNMVTPGHACTQKFS	230	22.5059	NaN	NaN	NaN	NaN	NaN	NaN	23.111	NaN	NaN	NaN	NaN	NaN	NaN	K	5	___1	1	2.19643e-35
P04075;J3KPS3;P04075-2;H3BQN4;H3BU78	P04075	Fructose-bisphosphate aldolase A;Fructose-bisphosphate aldolase	ALDOA	LLKPNMVTPGHACTQKFSHEEIAMATVTALR	243	21.5839	NaN	NaN	NaN	NaN	NaN	NaN	25.0208	NaN	NaN	NaN	NaN	NaN	NaN	K	4	___1	1	2.9586e-36
P04075;J3KPS3;P04075-2;H3BQN4;H3BPS8;P09972	P04075;P09972	Fructose-bisphosphate aldolase A;Fructose-bisphosphate aldolase;Fructose-bisphosphate aldolase C	ALDOA;ALDOC	PDGDHDLKRCQYVTEKVLAAVYKALSDHHIY;PDGDHDLKRCQYVTEKVLAAVYKALSDHHVY	208	21.6821	NaN	NaN	NaN	NaN	NaN	NaN	21.6655	NaN	NaN	22.6569	NaN	NaN	NaN	K	3	___1	1	0.000979286
P04075;J3KPS3;P04075-2;H3BQN4;H3BPS8;H3BR04;H3BU78	P04075	Fructose-bisphosphate aldolase A;Fructose-bisphosphate aldolase	ALDOA	YKKDGADFAKWRCVLKIGEHTPSALAIMENA	153	21.5436	NaN	NaN	NaN	NaN	NaN	NaN	22.5395	NaN	24.5451	25.4119	23.3149	23.6117	NaN	K	3	___1	1	2.41844e-104
P04075;J3KPS3;P04075-2;H3BQN4;H3BPS8;H3BUH7;H3BR04;H3BMQ8;H3BU78;P09972;K7EKH5;C9J8F3;J3KSV6;J3QKP5;A8MVZ9	P04075;P09972	Fructose-bisphosphate aldolase A;Fructose-bisphosphate aldolase;Fructose-bisphosphate aldolase C	ALDOA;ALDOC	SERCAQYKKDGADFAKWRCVLKIGEHTPSAL;SERCAQYKKDGADFAKWRCVLKISERTPSAL	147	23.3393	NaN	NaN	NaN	NaN	NaN	NaN	24.3917	NaN	NaN	NaN	NaN	NaN	NaN	K	2	___1	1	0.00228025
P04075;J3KPS3;P04075-2;H3BQN4;H3BPS8;H3BUH7;H3BR04;H3BMQ8;H3BU78	P04075	Fructose-bisphosphate aldolase A;Fructose-bisphosphate aldolase	ALDOA	QVIKSKGGVVGIKVDKGVVPLAGTNGETTTQ	111	NaN	NaN	NaN	25.2131	NaN	24.4822	NaN	23.0451	25.9081	NaN	NaN	23.7693	24.2336	25.142	K	3	___1	1	9.9971e-58
P04075;J3KPS3;P04075-2;H3BQN4;H3BPS8;H3BUH7	P04075	Fructose-bisphosphate aldolase A;Fructose-bisphosphate aldolase	ALDOA	GKGILAADESTGSIAKRLQSIGTENTEENRR	42	29.8541	25.029	29.7596	30.7876	30.0499	30.6686	29.8075	30.0222	28.9083	29.7285	30.8592	25.829	30.3772	30.981	K	3	___1	1	4.23319e-45
P04075;J3KPS3;P04075-2;H3BQN4;H3BPS8;H3BUH7;H3BR04;H3BMQ8	P04075	Fructose-bisphosphate aldolase A;Fructose-bisphosphate aldolase	ALDOA	___MPYQYPALTPEQKKELSDIAHRIVAPGK	13	29.1483	27.8641	27.3533	28.6013	27.9081	28.1008	24.2534	28.7256	27.3211	26.559	27.8856	27.3615	27.6736	28.3503	K	2	___1	1	1.25092e-79
P04075;P04075-2;H3BQN4;H3BPS8;P09972	P04075;P09972	Fructose-bisphosphate aldolase A;Fructose-bisphosphate aldolase;Fructose-bisphosphate aldolase C	ALDOA;ALDOC	PIVEPEILPDGDHDLKRCQYVTEKVLAAVYK	200	25.3896	NaN	NaN	NaN	NaN	NaN	NaN	19.2191	NaN	NaN	NaN	NaN	NaN	NaN	K	4	___1	1	4.82337e-100
P04080;A0A1W2PS52	P04080	Cystatin-B	CSTB	RSQLEEKENKKFPVFKAVSFKSQVVAGTNYF	39	21.2698	NaN	23.8504	24.1166	24.2276	23.6994	23.1776	23.4656	NaN	23.0623	NaN	NaN	NaN	23.5499	K	2	___1	1	0.00010383
P04080;A0A1W2PS52	P04080	Cystatin-B	CSTB	ETQHIADQVRSQLEEKENKKFPVFKAVSFKS	30	21.9953	NaN	NaN	NaN	NaN	NaN	NaN	21.828	NaN	NaN	NaN	NaN	NaN	NaN	K	2	___1	1	0.00475937
P04114	P04114	Apolipoprotein B-100;Apolipoprotein B-48	APOB	QNVDTKYQIRIQIQEKLQQLKRHIQNIDIQH	2265	NaN	NaN	NaN	23.2434	NaN	NaN	NaN	NaN	NaN	NaN	NaN	NaN	22.5943	21.8964	K	2	___1	1	1.97734e-07
P04114	P04114	Apolipoprotein B-100;Apolipoprotein B-48	APOB	PNGYSFSIPVKVLADKFIIPGLKLNDLNSVL	3729	20.9011	NaN	NaN	22.023	NaN	NaN	NaN	21.3921	NaN	NaN	NaN	NaN	NaN	NaN	K	2	___1	1	0.00336635
P04150-7;P04150-5;P04150-13;P04150-12;P04150-11;P04150-9;P04150-2;P04150-6;P04150-8;P04150-10;P04150;P04150-3	P04150-7	Glucocorticoid receptor	NR3C1	PKSSASTAVSAAPTEKEFPKTHSDVSSEQQH	154	NaN	20.8979	NaN	20.4892	21.8777	NaN	21.0695	NaN	NaN	NaN	NaN	20.1882	20.2321	20.8538	K	2	___1	1	9.75365e-06
P04406;P04406-2;E7EUT5	P04406	Glyceraldehyde-3-phosphate dehydrogenase	GAPDH	FTTMEKAGAHLQGGAKRVIISAPSADAPMFV	117	24.4863	NaN	25.2849	25.2576	25.7291	25.2771	23.6392	26.936	23.6944	25.165	25.5921	24.5628	25.6721	25.9093	K	3	___1	1	3.27225e-08
P04406;P04406-2;E7EUT5	P04406	Glyceraldehyde-3-phosphate dehydrogenase	GAPDH	QNIIPASTGAAKAVGKVIPELNGKLTGMAFR	219	NaN	NaN	NaN	21.1078	20.0878	NaN	NaN	NaN	21.429	NaN	NaN	22.5476	20.7654	22.6174	K	2	___1	1	0.000821026
P04406;P04406-2;E7EUT5	P04406	Glyceraldehyde-3-phosphate dehydrogenase	GAPDH	GAAKAVGKVIPELNGKLTGMAFRVPTANVSV	227	25.6179	NaN	27.7422	29.4038	28.5082	24.5984	27.4324	26.8108	25.3634	27.4261	28.4888	28.4105	28.072	27.7957	K	2	___1	1	7.5762e-08
P04406;P04406-2;E7EUT5	P04406	Glyceraldehyde-3-phosphate dehydrogenase	GAPDH	RGALQNIIPASTGAAKAVGKVIPELNGKLTG	215	24.6058	25.9027	25.0094	27.5409	NaN	25.7478	NaN	23.1226	24.6778	24.6238	NaN	25.8852	24.543	26.4469	K	2	___1	1	8.66488e-26
P04406;P04406-2;E7EUT5	P04406	Glyceraldehyde-3-phosphate dehydrogenase	GAPDH	RLEKPAKYDDIKKVVKQASEGPLKGILGYTE	263	NaN	21.7174	19.7866	19.7049	21.2497	NaN	NaN	NaN	NaN	NaN	NaN	NaN	NaN	NaN	K	2	___1	0.999967	0.00185916
P04406;P04406-2;E7EUT5	P04406	Glyceraldehyde-3-phosphate dehydrogenase	GAPDH	PTANVSVVDLTCRLEKPAKYDDIKKVVKQAS	251	NaN	23.7827	22.2548	22.7654	23.4764	22.3843	21.2241	26.1401	NaN	23.5665	24.0052	23.4811	21.673	23.2499	K	2	___1	0.999998	8.83511e-07
P04406;P04406-2;E7EUT5	P04406	Glyceraldehyde-3-phosphate dehydrogenase	GAPDH	NVSVVDLTCRLEKPAKYDDIKKVVKQASEGP	254	31.8602	27.5095	30.2247	30.7738	30.1169	30.9979	30.7766	31.2822	28.5996	30.627	30.87	29.024	29.1726	30.1933	K	2	___1	1	0.00146841
P04406;P04406-2	P04406	Glyceraldehyde-3-phosphate dehydrogenase	GAPDH	INGNPITIFQERDPSKIKWGDAGAEYVVEST	84	24.6672	NaN	23.0172	23.499	NaN	NaN	NaN	24.6488	NaN	22.9411	24.3528	24.1731	22.9961	21.7886	K	3	___1	1	1.4015e-26
P04406;P04406-2;E7EUT5	P04406	Glyceraldehyde-3-phosphate dehydrogenase	GAPDH	HAITATQKTVDGPSGKLWRDGRGALQNIIPA	194	22.5297	NaN	NaN	NaN	NaN	NaN	NaN	25.1929	NaN	NaN	22.3475	NaN	NaN	23.8209	K	2	___1	1	0.000352995
P04406;P04406-2;E7EUT5	P04406	Glyceraldehyde-3-phosphate dehydrogenase	GAPDH	VEGLMTTVHAITATQKTVDGPSGKLWRDGRG	186	22.7849	NaN	NaN	NaN	NaN	NaN	NaN	22.8525	NaN	NaN	NaN	NaN	NaN	NaN	K	4	___1	1	6.0033e-203
P04406;P04406-2;E7EUT5	P04406	Glyceraldehyde-3-phosphate dehydrogenase	GAPDH	PSADAPMFVMGVNHEKYDNSLKIISNASCTT	139	27.4768	25.8696	26.7922	27.714	28.4694	27.1179	26.5965	28.095	25.3224	28.7177	28.7102	26.1156	27.085	27.6822	K	3	___1	1	4.7975e-77
P04406;P04406-2;E7EUT5	P04406	Glyceraldehyde-3-phosphate dehydrogenase	GAPDH	MFVMGVNHEKYDNSLKIISNASCTTNCLAPL	145	NaN	NaN	NaN	NaN	NaN	NaN	NaN	23.5039	NaN	23.6737	22.9978	NaN	NaN	23.2012	K	3	___1	1	6.43375e-35
P04406;P04406-2;E7EUT5	P04406	Glyceraldehyde-3-phosphate dehydrogenase	GAPDH	GYSNRVVDLMAHMASKE______________	334	29.5508	27.0685	29.5366	30.8195	29.6231	30.3075	30.0054	30.0034	26.8323	29.3481	30.037	27.7828	29.1709	29.8631	K	2	___1	1	4.94193e-11
P04792;F8WE04	P04792	Heat shock protein beta-1	HSPB1	LDVNHFAPDELTVKTKDGVVEITGKHEERQD	114	NaN	21.877	21.1666	22.7708	22.218	22.4526	NaN	NaN	NaN	20.2193	21.4959	23.0396	21.2918	NaN	K	2	___1	1	0.00161989
P04792;F8WE04	P04792	Heat shock protein beta-1	HSPB1	VSLDVNHFAPDELTVKTKDGVVEITGKHEER	112	25.383	NaN	24.3911	24.3998	26.8346	26.15	24.6478	25.7512	NaN	27.3247	26.813	26.3541	24.4047	24.7157	K	3	___1	1	1.60749e-34
P05091;P05091-2;S4R3S4	P05091	Aldehyde dehydrogenase, mitochondrial	ALDH2	DSKTEQGPQVDETQFKKILGYINTGKQEGAK	368	NaN	23.4241	23.7479	23.3111	23.3905	24.5602	22.0381	22.7039	22.6317	23.4389	23.0475	22.7445	23.6556	23.125	K	2	___1	1	5.42562e-45
P05091;P05091-2	P05091	Aldehyde dehydrogenase, mitochondrial	ALDH2	EIGRVIQVAAGSSNLKRVTLELGGKSPNIIM	280	NaN	NaN	NaN	NaN	NaN	NaN	NaN	NaN	NaN	NaN	NaN	NaN	21.7293	NaN	K	2	___1	1	0.000121768
P05141	P05141	ADP/ATP translocase 2;ADP/ATP translocase 2, N-terminally processed	SLC25A5	FAKDFLAGGVAAAISKTAVAPIERVKLLLQV	23	20.8069	NaN	NaN	NaN	NaN	NaN	NaN	20.9567	NaN	23.5941	21.383	NaN	NaN	NaN	K	3	___1	1	1.83075e-06
P05141;V9GYG0;P12235;P12236;Q9H0C2	P05141;V9GYG0;P12236	ADP/ATP translocase 2;ADP/ATP translocase 2, N-terminally processed;ADP/ATP translocase 1;ADP/ATP translocase 3;ADP/ATP translocase 3, N-terminally processed;ADP/ATP translocase 4;ADP/ATP translocase 4, N-terminally processed	SLC25A5;SLC25A4;SLC25A6;SLC25A31	NVIRYFPTQALNFAFKDKYKQIFLGGVDKHT;NVIRYFPTQALNFAFKDKYKQIFLGGVDKRT;NVIRYFPTQALNFAFKDKYKQLFLGGVDRHK	92	29.3667	24.431	27.1303	27.2822	28.2353	27.4478	26.4177	30.0465	27.196	30.1755	28.3947	26.6514	28.151	28.4431	K	2	___1	1	6.23057e-25
S4R371;P05413;S4R3A2	S4R371	Fatty acid-binding protein, heart	FABP3	KPTTIIEKNGDILTLKTHSTFKNTEISFKLG	53	24.6509	NaN	NaN	NaN	25.073	24.6984	24.5822	25.363	21.0142	25.1445	24.7004	NaN	23.5554	24.8403	K	2	___1	1	2.23395e-29
S4R371;P05413;S4R3A2	S4R371	Fatty acid-binding protein, heart	FABP3	EKNGDILTLKTHSTFKNTEISFKLGVEFDET	59	24.4698	21.5827	22.2845	23.847	24.4459	24.1311	23.1524	25.7579	NaN	24.9976	24.2248	21.7569	23.7112	24.9978	K	3	___1	1	8.52677e-08
S4R371;P05413;S4R3A2	S4R371	Fatty acid-binding protein, heart	FABP3	TRQVASMTKPTTIIEKNGDILTLKTHSTFKN	45	24.8105	NaN	NaN	25.549	25.5056	25.2192	25.9317	25.0574	22.9011	26.7307	25.9138	22.1026	25.703	25.6555	K	3	___1	1	1.41709e-62
P05976	P05976	Myosin light chain 1/3, skeletal muscle isoform	MYL1	________MAPKKDVKKPVAAAAAAPAPAPA	8	24.8683	NaN	23.3427	21.1424	25.4367	24.5614	22.5612	24.8513	23.2391	23.4985	25.1137	25.7332	23.5107	25.2033	K	3	___1	0.774369	2.07158e-26
P05976	P05976	Myosin light chain 1/3, skeletal muscle isoform	MYL1	_______MAPKKDVKKPVAAAAAAPAPAPAP	9	NaN	NaN	NaN	NaN	21.446	NaN	NaN	NaN	NaN	NaN	NaN	NaN	NaN	NaN	K	3	___1	1	2.94493e-06
P05976	P05976	Myosin light chain 1/3, skeletal muscle isoform	MYL1	APAPAPAPAPAPAPAKPKEEKIDLSAIKIEF	32	28.216	25.2975	27.3514	28.6129	27.0747	27.3117	25.854	27.9518	25.3351	26.5896	27.393	26.8156	26.6873	27.2668	K	3	___1	1	1.58723e-27
P05976	P05976	Myosin light chain 1/3, skeletal muscle isoform	MYL1	PAPAPAPAPAKPKEEKIDLSAIKIEFSKEQQ	37	27.6147	22.7942	26.4057	28.2279	28.1761	27.4201	27.0009	27.5633	26.3605	26.9489	28.0558	26.0168	26.7849	28.2541	K	2	___1	1	0.00286225
P05976	P05976	Myosin light chain 1/3, skeletal muscle isoform	MYL1	APAKPKEEKIDLSAIKIEFSKEQQDEFKEAF	44	21.5643	22.1084	22.2016	24.7201	24.2937	22.3645	21.6968	22.9261	NaN	23.1567	24.8362	24.3371	23.9165	23.7257	K	2	___1	1	1.72464e-12
P05976	P05976	Myosin light chain 1/3, skeletal muscle isoform	MYL1	SAIKIEFSKEQQDEFKEAFLLFDRTGDSKIT	56	NaN	NaN	NaN	NaN	NaN	NaN	NaN	20.9924	NaN	NaN	NaN	NaN	NaN	NaN	K	2	___1	1	0.00022759
P05976;P05976-2	P05976;P05976-2	Myosin light chain 1/3, skeletal muscle isoform	MYL1	VMGAELRHVLATLGEKMKEEEVEALMAGQED	162	27.9172	25.6726	26.9534	27.3008	27.0991	26.9643	23.7559	27.1129	22.1904	26.3558	27.6436	24.8094	26.2772	26.7401	K	3	___1	1	3.27636e-07
P05976;P05976-2	P05976;P05976-2	Myosin light chain 1/3, skeletal muscle isoform	MYL1	EFKEAFLLFDRTGDSKITLSQVGDVLRALGT	69	25.55	25.7183	29.5359	28.8199	29.1335	27.6782	27.3079	25.7631	25.3379	28.0275	28.7195	29.6884	27.4734	28.9355	K	2	___1	1	9.61382e-143
P05976;P05976-2	P05976;P05976-2	Myosin light chain 1/3, skeletal muscle isoform	MYL1	VRKVLGNPSNEELNAKKIEFEQFLPMMQAIS	106	28.0172	29.0334	29.0584	30.1923	28.865	28.9532	27.6879	28.2067	27.9896	27.9043	29.2906	29.9513	28.3962	29.1845	K	2	___1	1	6.21659e-45
P06576	P06576	ATP synthase subunit beta, mitochondrial	ATP5B	FYMVGPIEEAVAKADKLAEEHSS________	522	30.3019	26.9809	27.4734	26.9998	27.0916	28.0776	27.0331	30.8837	26.4018	29.1421	27.8674	27.7255	28.5915	27.8589	K	2	___1	1	6.62495e-05
P06576;H0YH81;F8W079;F8W0P7;H0YI37	P06576	ATP synthase subunit beta, mitochondrial;ATP synthase subunit beta	ATP5B	NDLYHEMIESGVINLKDATSKVALVYGQMNE	259	24.9316	NaN	NaN	NaN	NaN	NaN	NaN	25.2754	NaN	22.3712	NaN	NaN	NaN	NaN	K	4	___1	1	1.12364e-90
P06576	P06576	ATP synthase subunit beta, mitochondrial	ATP5B	SQPFQVAEVFTGHMGKLVPLKETIKGFQQIL	480	NaN	NaN	NaN	NaN	NaN	NaN	NaN	NaN	NaN	NaN	23.575	21.6527	21.5817	NaN	K	3	___1	1	6.04683e-24
P06576;H0YH81;F8W079	P06576	ATP synthase subunit beta, mitochondrial;ATP synthase subunit beta	ATP5B	RTIAMDGTEGLVRGQKVLDSGAPIKIPVGPE	124	19.8737	21.4568	NaN	NaN	NaN	21.3614	22.0781	NaN	24.2685	21.687	NaN	21.8518	20.2518	23.3934	K	3	___1	1	3.50614e-98
P06576;H0YH81;F8W079	P06576	ATP synthase subunit beta, mitochondrial;ATP synthase subunit beta	ATP5B	GLVRGQKVLDSGAPIKIPVGPETLGRIMNVI	133	30.4423	26.1531	31.4479	30.3127	30.5676	31.0078	31.2538	28.0482	29.7418	32.7126	30.8699	27.8212	30.902	30.703	K	3	___1	1	3.50614e-98
P06576	P06576	ATP synthase subunit beta, mitochondrial	ATP5B	NIVGSEHYDVARGVQKILQDYKSLQDIIAIL	426	NaN	NaN	NaN	NaN	21.4892	NaN	NaN	NaN	23.0063	NaN	NaN	23.3568	NaN	23.0267	K	2	___1	1	0.000107805
P06576;H0YH81;F8W079	P06576	ATP synthase subunit beta, mitochondrial;ATP synthase subunit beta	ATP5B	IMNVIGEPIDERGPIKTKQFAPIHAEAPEFM	159	22.071	21.1615	20.7466	NaN	23.9118	22.1936	NaN	24.1671	NaN	24.5776	23.1847	25.1725	20.857	23.6098	K	3	___1	1	7.31386e-10
P06703;R4GN98	P06703	Protein S100-A6;Protein S100	S100A6	DKHTLSKKELKELIQKELTIGSKLQDAEIAR	40	NaN	NaN	NaN	NaN	NaN	NaN	NaN	NaN	NaN	NaN	NaN	21.4983	NaN	NaN	K	2	___1	1	0.000461393
P06732	P06732	Creatine kinase M-type;Creatine kinase M-type, N-terminally processed	CKM	TLPPHCSRGERRAVEKLSVEALNSLTGEFKG	156	27.6968	26.8624	27.9725	29.2554	28.0566	28.074	26.1268	28.0357	26.7048	26.8747	29.404	26.3493	27.4063	26.5932	K	3	___1	1	3.26162e-193
P06732	P06732	Creatine kinase M-type;Creatine kinase M-type, N-terminally processed	CKM	EKLSVEALNSLTGEFKGKYYPLKSMTEKEQQ	170	25.7079	28.1613	28.1047	28.4505	28.1862	27.824	25.5266	26.506	25.9211	27.9523	27.8852	28.1568	28.0431	28.7715	K	2	___1	1	2.16849e-163
P06732	P06732	Creatine kinase M-type;Creatine kinase M-type, N-terminally processed	CKM	EKEQQQLIDDHFLFDKPVSPLLLASGMARDW	196	22.5772	NaN	NaN	NaN	NaN	NaN	NaN	23.4218	NaN	24.2147	26.4046	23.6752	NaN	NaN	K	3	___1	1	1.3217e-67
P06732	P06732	Creatine kinase M-type;Creatine kinase M-type, N-terminally processed	CKM	_____MPFGNTHNKFKLNYKPEEEYPDLSKH	11	28.4191	23.8606	21.0356	24.6217	25.717	21.8326	NaN	29.0653	23.7238	24.065	23.3469	24.2049	22.5658	24.7294	K	2	___1	1	1.22676e-35
P06732	P06732	Creatine kinase M-type;Creatine kinase M-type, N-terminally processed	CKM	_MPFGNTHNKFKLNYKPEEEYPDLSKHNNHM	15	23.7561	22.2164	22.158	24.2145	24.093	23.5763	22.034	23.57	24.0423	23.7764	24.057	23.5106	23.1936	25.1687	K	2	___1	1	0.000308119
P06732	P06732	Creatine kinase M-type;Creatine kinase M-type, N-terminally processed	CKM	EDHLRVISMEKGGNMKEVFRRFCVGLQKIEE	247	23.7289	24.5871	24.3014	24.9538	24.4332	24.743	21.8603	25.4141	24.5215	23.2256	25.4225	24.8067	25.0124	25.607	K	2	___1	1	0.00122877
P06732	P06732	Creatine kinase M-type;Creatine kinase M-type, N-terminally processed	CKM	CPSNLGTGLRGGVHVKLAHLSKHPKFEEILT	298	32.0849	27.2374	27.1085	27.9188	28.5904	27.6703	26.7279	31.3911	24.8314	27.5954	29.1353	28.5954	26.3226	28.353	K	3	___1	1	1.849e-13
P06732	P06732	Creatine kinase M-type;Creatine kinase M-type, N-terminally processed	CKM	TGLRGGVHVKLAHLSKHPKFEEILTRLRLQK	304	30.4188	26.9008	27.1117	28.002	27.6966	21.6211	26.2878	30.453	25.0998	27.0042	27.8867	24.3361	27.0453	29.1341	K	3	___1	1	0.000112513
P06732	P06732	Creatine kinase M-type;Creatine kinase M-type, N-terminally processed	CKM	LNSLTGEFKGKYYPLKSMTEKEQQQLIDDHF	177	27.5748	27.9339	27.6606	28.5716	27.753	27.2062	26.1382	27.4103	26.6628	25.7954	28.4368	28.1105	27.2381	27.4278	K	2	___1	1	0.000335268
P06732	P06732	Creatine kinase M-type;Creatine kinase M-type, N-terminally processed	CKM	KELFDPIISDRHGGYKPTDKHKTDLNHENLK	101	27.5596	24.6459	23.5426	24.8199	24.1999	24.0944	22.5598	27.7233	22.6601	24.4934	24.6768	23.1926	24.6641	25.606	K	2	___1	1	0.00038742
P06732	P06732	Creatine kinase M-type;Creatine kinase M-type, N-terminally processed	CKM	DPIISDRHGGYKPTDKHKTDLNHENLKGGDD	105	30.0038	25.5462	25.382	25.7584	26.2344	25.4531	24.1895	29.7758	20.1674	21.9769	24.2659	23.4586	23.6936	25.27	K	3	___1	1	1.32539e-33
P06732	P06732	Creatine kinase M-type;Creatine kinase M-type, N-terminally processed	CKM	EEEYPDLSKHNNHMAKVLTLELYKKLRDKET	32	22.2317	NaN	NaN	NaN	NaN	NaN	NaN	21.3568	NaN	NaN	NaN	NaN	NaN	NaN	K	3	___1	1	0.00140848
P06732	P06732	Creatine kinase M-type;Creatine kinase M-type, N-terminally processed	CKM	KHNNHMAKVLTLELYKKLRDKETPSGFTVDD	40	28.907	29.9044	30.3299	31.5767	32.618	31.1788	27.506	29.6156	29.8555	32.6564	31.0488	28.9412	30.4515	30.2123	K	2	___1	1	0.000369174
P06732	P06732	Creatine kinase M-type;Creatine kinase M-type, N-terminally processed	CKM	RGGVHVKLAHLSKHPKFEEILTRLRLQKRGT	307	33.6272	27.2758	28.8171	29.3646	30.0598	29.8003	29.2351	33.7995	26.7666	30.942	30.4181	27.402	28.9213	28.9918	K	3	___1	1	2.76771e-08
P06732	P06732	Creatine kinase M-type;Creatine kinase M-type, N-terminally processed	CKM	QLVVDGVKLMVEMEKKLEKGQSIDDMIPAQK	366	NaN	26.4559	28.6589	26.3488	25.1731	26.9157	24.6786	25.9696	25.073	26.3016	29.1557	20.9713	21.4121	28.9588	K	3	___1	0.983138	1.18723e-28
P06732	P06732	Creatine kinase M-type;Creatine kinase M-type, N-terminally processed	CKM	VDGVKLMVEMEKKLEKGQSIDDMIPAQK___	369	29.276	29.6061	27.9449	30.2173	30.4648	29.7097	28.4492	28.4515	27.6598	29.6189	28.0128	29.708	29.3589	29.2736	K	3	___1	1	6.0649e-222
P06732	P06732	Creatine kinase M-type;Creatine kinase M-type, N-terminally processed	CKM	VQLVVDGVKLMVEMEKKLEKGQSIDDMIPAQ	365	28.6793	27.2415	27.7214	28.8497	28.5192	28.5758	28.0479	29.1474	25.9695	27.883	28.8574	27.6551	27.862	28.2511	K	2	___1	1	0.00055825
P06732	P06732	Creatine kinase M-type;Creatine kinase M-type, N-terminally processed	CKM	_______MPFGNTHNKFKLNYKPEEEYPDLS	9	32.1224	29.9365	30.0488	30.8864	31.5551	30.6205	29.3182	32.6481	28.0911	30.9907	31.4629	28.6364	30.2447	30.7693	K	2	___1	1	1.75065e-41
P06732	P06732	Creatine kinase M-type;Creatine kinase M-type, N-terminally processed	CKM	GEFKGKYYPLKSMTEKEQQQLIDDHFLFDKP	182	29.3154	26.2685	26.6043	27.0961	27.7467	26.3057	25.8625	29.8992	24.6992	27.7425	27.2748	27.0008	26.3001	26.9852	K	3	___1	1	1.2188e-185
P06732	P06732	Creatine kinase M-type;Creatine kinase M-type, N-terminally processed	CKM	KPTDKHKTDLNHENLKGGDDLDPNYVLSSRV	116	29.9668	23.5869	24.4322	25.0623	25.5404	25.278	21.5135	28.3188	NaN	25.4301	25.5688	24.7649	23.3243	25.323	K	3	___1	1	3.54383e-68
P06732	P06732	Creatine kinase M-type;Creatine kinase M-type, N-terminally processed	CKM	VWVNEEDHLRVISMEKGGNMKEVFRRFCVGL	242	32.5491	28.1386	29.6496	30.2579	28.5876	30.0325	29.7767	31.7997	29.5556	28.9794	30.3625	29.4271	30.4666	30.9925	K	2	___1	1	2.30619e-10
P06733;P06733-2;K7EM90	P06733	Alpha-enolase;Enolase	ENO1	ILGVSLAVCKAGAVEKGVPLYRHIADLAGNS	126	25.2932	21.9325	23.4395	25.4064	24.1921	24.7068	22.0831	24.6996	24.355	22.0169	24.8715	25.1586	24.5029	25.1284	K	2	___1	1	1.31516e-09
P06733;P06733-2	P06733	Alpha-enolase	ENO1	LTVTNPKRIAKAVNEKSCNCLLLKVNQIGSV	335	NaN	NaN	NaN	NaN	NaN	NaN	NaN	NaN	NaN	NaN	NaN	21.8999	22.178	22.555	K	2	___1	1	1.0566e-06
P06733;P06733-2	P06733	Alpha-enolase	ENO1	FAPNILENKEGLELLKTAIGKAGYTDKVVIG	228	24.4344	25.7198	25.993	26.8377	26.432	25.5983	NaN	25.5274	NaN	25.9778	25.8095	NaN	25.2979	25.602	K	2	___1	1	1.70979e-12
P06733;K7EM90	P06733	Alpha-enolase;Enolase	ENO1	LVSKKLNVTEQEKIDKLMIEMDGTENKSKFG	92	NaN	21.1596	21.8556	23.4759	23.3484	23.6537	22.3593	NaN	19.6169	21.7344	21.9384	21.8493	22.8722	23.8758	K	2	___1	1	7.51598e-07
P06733;P06733-2	P06733	Alpha-enolase	ENO1	FREAMRIGAEVYHNLKNVIKEKYGKDATNVG	193	NaN	NaN	NaN	NaN	NaN	NaN	NaN	23.8522	NaN	NaN	20.8084	21.9706	NaN	NaN	K	3	___1	1	2.39437e-05
P06733;P06733-2	P06733	Alpha-enolase	ENO1	GQIKTGAPCRSERLAKYNQLLRIEEELGSKA	406	23.5853	NaN	22.4198	24.1428	24.7746	23.8473	22.7828	24.4709	NaN	23.7546	23.6986	NaN	23.0505	23.9981	K	2	___1	1	0.000436869
P06733;K7EM90	P06733	Alpha-enolase;Enolase	ENO1	APALVSKKLNVTEQEKIDKLMIEMDGTENKS	89	24.1602	24.4609	24.3193	25.4621	24.3295	25.7612	24.405	22.8198	23.5759	21.1892	25.1081	24.1111	24.5077	25.1245	K	2	___1	1	6.36122e-34
P06733;K7EM90;K7ERS8	P06733	Alpha-enolase;Enolase	ENO1	___________MSILKIHAREIFDSRGNPTV	5	26.9223	21.1373	27.1094	27.585	28.0101	27.2364	23.396	26.4336	23.8184	24.2673	27.3421	27.0539	27.3913	26.966	K	2	___1	1	1.18297e-10
P06744;A0A0A0MTS2;P06744-2;K7EQ48;A0A0J9YXP8;A0A0J9YYH3;A0A0J9YX90	P06744	Glucose-6-phosphate isomerase	GPI	KEWFLQAAKDPSAVAKHFVALSTNTTKVKEF	241	20.6599	NaN	NaN	NaN	NaN	NaN	NaN	21.1099	NaN	NaN	NaN	NaN	NaN	NaN	K	3	___1	1	0.000506991
P06744;A0A0A0MTS2;P06744-2;K7EQ48;A0A0J9YXP8;A0A0J9YYH3;A0A0J9YX90	P06744	Glucose-6-phosphate isomerase	GPI	SAVAKHFVALSTNTTKVKEFGIDPQNMFEFW	252	24.4908	NaN	22.9254	NaN	22.4476	22.5551	22.3001	24.4977	20.7602	22.1275	23.3273	23.2624	22.7382	23.2499	K	3	___1	1	3.26994e-11
P06744;A0A0A0MTS2;P06744-2;K7EQ48;A0A0J9YXP8;A0A0J9YYH3;A0A0J9YX90;K7EP41;K7EPY4;K7ELR7	P06744	Glucose-6-phosphate isomerase	GPI	SRGVEAARERMFNGEKINYTEGRAVLHVALR	89	22.367	20.6059	19.5054	NaN	20.185	20.977	NaN	21.9253	NaN	NaN	22.1194	NaN	20.061	22.3658	K	2	___1	1	1.39857e-11
P06748-2;P06748;P06748-3	P06748-2	Nucleophosmin	NPM1	KTPKTPKGPSSVEDIKAKMQASIEKGGSLPK	219	NaN	NaN	NaN	21.8676	21.5859	NaN	NaN	NaN	NaN	23.2152	21.7488	22.6125	21.2884	20.8039	K	2	___1	1	1.30034e-06
P06748-2;P06748	P06748-2	Nucleophosmin	NPM1	SSVEDIKAKMQASIEKGGSLPKVEAKFINYV	228	NaN	NaN	NaN	NaN	NaN	NaN	NaN	NaN	NaN	NaN	NaN	21.9134	20.4254	21.2153	K	2	___1	1	2.67314e-05
P06748-2;P06748	P06748-2	Nucleophosmin	NPM1	QASIEKGGSLPKVEAKFINYVKNCFRMTDQE	238	28.0017	23.9632	26.5607	28.588	28.6363	27.7606	27.6895	28.5122	25.7342	28.029	28.5476	26.1168	28.0264	28.7169	K	2	___1	1	4.12557e-05
P06753;P06753-5;P06753-4;P06753-7	P06753;P06753-5	Tropomyosin alpha-3 chain	TPM3	CSELEEELKNVTNNLKSLEAQAEKYSQKEDK	206	NaN	NaN	21.7402	23.2404	24.0411	23.3239	NaN	NaN	21.378	NaN	NaN	23.4156	NaN	23.7265	K	2	___1	1	8.95953e-63
P06753;P06753-5;P06753-4;P06753-7	P06753;P06753-5	Tropomyosin alpha-3 chain	TPM3	KNVTNNLKSLEAQAEKYSQKEDKYEEEIKIL	214	30.1827	31.1421	30.2502	31.437	30.5486	31.0185	28.813	31.2527	29.2373	30.6906	31.3644	30.844	29.8427	31.1388	K	2	___1	1	9.24518e-49
P07108;B8ZWD1;A0A0A0MTI5;P07108-3;P07108-2;P07108-4;P07108-5	P07108	Acyl-CoA-binding protein	DBI	INTERPGMLDFTGKAKWDAWNELKGTSKEDA	55	25.6319	NaN	NaN	NaN	NaN	NaN	NaN	23.4034	NaN	NaN	NaN	NaN	NaN	NaN	K	2	___1	1	0.000998188
P07108;B8ZWD1;A0A0A0MTI5;P07108-3;P07108-2;P07108-4;P07108-5	P07108	Acyl-CoA-binding protein	DBI	GDINTERPGMLDFTGKAKWDAWNELKGTSKE	53	NaN	NaN	NaN	NaN	NaN	NaN	NaN	NaN	NaN	NaN	NaN	22.0782	NaN	NaN	K	3	___1	1	2.64965e-06
P07108;B8ZWD1;A0A0A0MTI5;P07108-3;P07108-2;P07108-4;P07108-5;P07108-6	P07108	Acyl-CoA-binding protein	DBI	AEFEKAAEEVRHLKTKPSDEEMLFIYGHYKQ	19	24.7414	NaN	NaN	NaN	NaN	NaN	NaN	23.7854	NaN	NaN	NaN	NaN	NaN	NaN	K	3	___1	1	5.18408e-06
P07195	P07195	L-lactate dehydrogenase B chain	LDHB	SVINQKLKDDEVAQLKKSADTLWDIQKDLKD	318	21.957	22.3609	19.9202	21.3346	NaN	21.8377	NaN	24.4347	NaN	NaN	NaN	NaN	NaN	NaN	K	2	___1	1	3.19088e-09
P07195	P07195	L-lactate dehydrogenase B chain	LDHB	PCILNARGLTSVINQKLKDDEVAQLKKSADT	308	23.4529	23.545	22.697	24.5287	25.7754	25.0147	23.4636	25.458	NaN	NaN	24.4399	24.3256	NaN	NaN	K	2	___1	1	2.92034e-09
P07195;A8MW50;C9J7H8;F5H793	P07195	L-lactate dehydrogenase B chain;L-lactate dehydrogenase	LDHB	QHGSLFLQTPKIVADKDYSVTANSKIVVVTA	82	NaN	24.7036	22.725	23.8577	NaN	22.8798	23.1481	NaN	22.302	23.2613	23.8844	23.3135	24.1678	21.5413	K	2	___1	1	2.79546e-05
P07237;H7BZ94;H0Y3Z3;I3L398;I3L4M2	P07237	Protein disulfide-isomerase	P4HB	SDHTDNQRILEFFGLKKEECPAVRLITLEEE	308	NaN	NaN	NaN	NaN	NaN	NaN	NaN	NaN	NaN	NaN	NaN	22.6715	NaN	21.2654	K	2	___1	1	0.00773838
P07237;H7BZ94;H0Y3Z3	P07237	Protein disulfide-isomerase	P4HB	KVLVGKNFEDVAFDEKKNVFVEFYAPWCGHC	385	NaN	NaN	NaN	NaN	NaN	NaN	NaN	22.1216	NaN	NaN	NaN	NaN	NaN	NaN	K	2	___1	1	0.00132174
P07237;H7BZ94;H0Y3Z3;I3L0S0	P07237	Protein disulfide-isomerase	P4HB	ANEVEAVKVHSFPTLKFFPASADRTVIDYNG	444	21.7423	NaN	NaN	NaN	NaN	NaN	NaN	22.4302	NaN	NaN	NaN	NaN	NaN	NaN	K	3	___1	1	5.60124e-14
P07305-2;P07305	P07305-2	Histone H1.0;Histone H1.0, N-terminally processed	H1F0	QIKLSIKRLVTTGVLKQTKGVGASGSFRLAK	65	NaN	NaN	22.5703	24.0171	22.5873	23.0998	23.2633	23.119	20.5325	21.5836	23.1903	NaN	23.9487	23.5984	K	2	___1	1	2.05452e-07
P07305-2;P07305	P07305-2	Histone H1.0;Histone H1.0, N-terminally processed	H1F0	QAEKNRAGSSRQSIQKYIKSHYKVGENADSQ	35	NaN	NaN	19.9369	20.6626	20.2012	20.5322	NaN	NaN	NaN	20.2208	21.7613	NaN	21.5702	21.2144	K	2	___1	1	0.0036932
P07355;P07355-2;H0YN42;H0YMD0;H0YMU9;A6NMY6;H0YKS4;H0YMM1;H0YKZ7;H0YLV6;H0YMT9;H0YKX9;H0YKL9;H0YMW4;H0YMD9;H0YKV8;H0YKN4	P07355	Annexin A2;Annexin;Putative annexin A2-like protein	ANXA2;ANXA2P2	NFDAERDALNIETAIKTKGVDEVTIVNILTN	47	22.1928	21.4508	21.7915	23.1181	21.9522	23.4372	NaN	22.0869	24.0623	23.4068	22.0886	22.1439	21.7819	22.7355	K	2	___1	1	6.21842e-07
P07355;P07355-2;A6NMY6	P07355	Annexin A2;Putative annexin A2-like protein	ANXA2;ANXA2P2	VLIRIMVSRSEVDMLKIRSEFKRKYGKSLYY	302	NaN	NaN	19.8154	20.6365	20.0789	NaN	NaN	NaN	NaN	NaN	NaN	NaN	NaN	21.1277	K	2	___1	1	0.00189665
P07355;P07355-2;H0YN42;A6NMY6;H0YM50;H0YNP5;H0YN28;H0YL33	P07355	Annexin A2;Annexin;Putative annexin A2-like protein	ANXA2;ANXA2P2	KWISIMTERSVPHLQKVFDRYKSYSPYDMLE	227	24.3653	NaN	NaN	21.4132	NaN	NaN	NaN	NaN	NaN	NaN	22.601	NaN	22.0262	22.1205	K	3	___1	1	0.00140474
P07451	P07451	Carbonic anhydrase 3	CA3	ALDKIKTKGKEAPFTKFDPSCLFPACRDYWT	177	25.6496	NaN	NaN	NaN	NaN	NaN	NaN	27.1008	NaN	26.5631	25.7023	23.7827	24.4644	23.2163	K	3	___1	1	1.34637e-57
P07451	P07451	Carbonic anhydrase 3	CA3	LLLKEPMTVSSDQMAKLRSLLSSAENEPPVP	224	26.2621	27.0409	26.4893	26.5472	25.2504	26.8125	25.3403	27.7326	25.7876	25.1433	27.7406	26.6387	27.3378	27.5349	K	3	___1	1	5.54704e-12
P07451	P07451	Carbonic anhydrase 3	CA3	PNAKGENQSPVELHTKDIRHDPSLQPWSVSY	36	23.3834	NaN	NaN	NaN	NaN	NaN	NaN	24.0666	NaN	NaN	NaN	NaN	NaN	NaN	K	3	___1	1	3.7744e-05
P07451	P07451	Carbonic anhydrase 3	CA3	VSYDGGSAKTILNNGKTCRVVFDDTYDRSML	64	NaN	NaN	NaN	NaN	NaN	NaN	NaN	NaN	21.838	NaN	21.1591	21.094	22.335	20.8974	K	2	___1	1	0.00747953
P07451	P07451	Carbonic anhydrase 3	CA3	GVKYAAELHLVHWNPKYNTFKEALKQRDGIA	126	22.3297	NaN	NaN	NaN	NaN	NaN	NaN	NaN	NaN	NaN	NaN	NaN	NaN	NaN	K	4	___1	1	0.000712573
P07451	P07451	Carbonic anhydrase 3	CA3	AELHLVHWNPKYNTFKEALKQRDGIAVIGIF	131	31.0627	30.6025	30.4158	30.7643	31.2678	31.5811	31.1185	30.9519	31.565	30.9888	31.2321	31.8945	31.7784	32.0561	K	3	___1	1	5.11409e-33
P07585;F8VXZ8;F8VUF6;F8VWU0;F8VX58;P07585-4	P07585	Decorin	DCN	NNKITEIKDGDFKNLKNLHALILVNNKISKV	105	22.0924	NaN	NaN	NaN	NaN	NaN	NaN	20.3117	NaN	NaN	NaN	NaN	NaN	NaN	K	3	___1	1	0.000116968
P07585;P07585-2	P07585	Decorin	DCN	PLKSSGIENGAFQGMKKLSYIRIADTNITSI	200	21.357	22.9171	22.8928	24.26	22.9352	23.0549	23.0438	22.8551	22.4099	22.1596	23.2595	23.0756	23.2977	23.0877	K	2	___1	1	8.42924e-17
P07585;F8VXZ8;F8VUF6;F8VWU0	P07585	Decorin	DCN	NKISKVSPGAFTPLVKLERLYLSKNQLKELP	130	22.9402	24.3184	23.5354	24.7559	24.7153	23.0259	22.4046	23.3936	NaN	23.327	24.2926	24.5705	24.5897	23.9197	K	2	___1	1	2.49699e-19
P07585;F8VXZ8;F8VUF6;F8VWU0;F8VX58;P07585-4	P07585	Decorin	DCN	QCHLRVVQCSDLGLDKVPKDLPPDTTLLDLQ	74	NaN	NaN	NaN	NaN	NaN	NaN	NaN	NaN	NaN	NaN	NaN	NaN	20.4104	21.3775	K	2	___1	1	0.000405534
P07900;P07900-2;P08238;Q58FF7	P07900;P08238	Heat shock protein HSP 90-alpha;Heat shock protein HSP 90-beta;Putative heat shock protein HSP 90-beta-3	HSP90AA1;HSP90AB1;HSP90AB3P	APFDLFENKKKKNNIKLYVRRVFIMDSCDEL;APFDLFENRKKKNNIKLYVRRVFIMDNCEEL	354	NaN	22.4074	21.5077	21.0123	NaN	21.435	21.9008	23.0597	NaN	19.7641	NaN	NaN	NaN	NaN	K	2	___1	1	0.00563541
P07919;A0A096LP55	P07919	Cytochrome b-c1 complex subunit 6, mitochondrial;Cytochrome b-c1 complex subunit 6	UQCRH;UQCRHL	ELFDFLHARDHCVAHKLFNNLK_________	85	25.7909	NaN	NaN	NaN	NaN	NaN	NaN	25.0054	NaN	NaN	NaN	NaN	NaN	NaN	K	3	___1	1	6.95176e-45
P07919;A0A096LP55	P07919	Cytochrome b-c1 complex subunit 6, mitochondrial;Cytochrome b-c1 complex subunit 6	UQCRH;UQCRHL	VDPLTTVREQCEQLEKCVKARERLELCDERV	42	NaN	NaN	NaN	NaN	NaN	NaN	NaN	NaN	NaN	19.9435	21.2453	22.6289	19.5634	20.1796	K	2	___1	1	0.000264023
P07951;Q5TCU3;Q5TCU8;U3KQK2	P07951;Q5TCU3	Tropomyosin beta chain	TPM2	GELERSEERAEVAESKCGDLEEELKIVTNNL	189	23.7295	22.0764	21.6499	24.3182	23.8624	23.3185	NaN	24.5522	23.1179	22.1651	24.3102	25.4823	23.7754	25.5556	K	2	___1	1	2.21352e-96
P07951;Q5TCU3;Q5TCU8;U3KQK2	P07951;Q5TCU3	Tropomyosin beta chain	TPM2	AEVAESKCGDLEEELKIVTNNLKSLEAQADK	198	20.6333	NaN	NaN	NaN	NaN	NaN	NaN	21.1382	NaN	NaN	NaN	NaN	NaN	NaN	K	2	___1	1	4.6803e-07
P07951;Q5TCU3;Q5TCU8;U3KQK2	P07951;Q5TCU3	Tropomyosin beta chain	TPM2	CGDLEEELKIVTNNLKSLEAQADKYSTKEDK	205	26.6303	24.1674	25.5102	28.3066	27.2083	28.2663	27.4845	27.1459	27.4864	26.669	27.0918	28.5078	27.1303	28.5556	K	2	___1	1	1.42972e-101
P07951;Q5TCU3;Q5TCU8	P07951;Q5TCU3	Tropomyosin beta chain	TPM2	DEVEKYSESVKEAQEKLEQAEKKATDAEADV	70	30.6545	30.3393	29.4967	30.5836	29.9772	30.1052	28.8697	30.9131	27.5144	28.9166	29.616	29.4409	28.6229	29.0873	K	2	___1	1	1.2381e-83
P07951;Q5TCU3;Q5TCU8;U3KQK2	P07951;Q5TCU3	Tropomyosin beta chain	TPM2	KIVTNNLKSLEAQADKYSTKEDKYEEEIKLL	213	27.862	26.9787	25.6479	26.9046	28.8974	28.7878	23.7852	28.9027	26.6105	27.3502	28.2526	29.2195	27.4493	28.9097	K	2	___1	1	5.49838e-12
P07954-2;P07954	P07954-2	Fumarate hydratase, mitochondrial	FH	TERMPTPVIKAFGILKRAAAEVNQDYGLDPK	57	23.467	NaN	22.2219	22.7067	23.7928	23.1271	23.1181	24.6967	NaN	23.5642	23.6709	23.6116	23.3187	23.8093	K	2	___1	1	0.00761381
P07954-2;P07954	P07954-2	Fumarate hydratase, mitochondrial	FH	ISNRAIEMLGGELGSKIPVHPNDHVNKSQSS	129	25.6132	NaN	NaN	NaN	23.1527	NaN	NaN	27.4829	NaN	26.151	24.2985	23.4936	23.5092	22.6015	K	4	___1	1	3.23392e-22
P07954-2;P07954	P07954-2	Fumarate hydratase, mitochondrial	FH	HDALDAKSKEFAQIIKIGRTHTQDAVPLTLG	187	19.4326	NaN	NaN	24.3221	24.4815	NaN	NaN	22.6567	NaN	NaN	NaN	NaN	NaN	NaN	K	2	___1	1	0.00426564
P07954-2;P07954	P07954-2	Fumarate hydratase, mitochondrial	FH	NQDYGLDPKIANAIMKAADEVAEGKLNDHFP	79	25.0366	22.8439	23.32	22.5872	25.9364	25.5701	23.9319	26.9692	26.041	27.065	25.3276	25.6423	26.2075	26.2814	K	2	___1	1	2.70367e-47
P07954-2;P07954	P07954-2	Fumarate hydratase, mitochondrial	FH	SQNSFRIEYDTFGELKVPNDKYYGAQTVRST	18	20.2545	22.6391	24.1829	23.9763	24.849	25.775	NaN	24.5927	22.3471	26.4565	24.3266	24.8444	24.8728	24.7415	K	2	___1	1	1.32493e-43
P07954-2;P07954	P07954-2	Fumarate hydratase, mitochondrial	FH	RIEYDTFGELKVPNDKYYGAQTVRSTMNFKI	23	26.1062	24.6054	NaN	24.2159	NaN	NaN	23.5169	26.667	25.9179	NaN	NaN	NaN	26.0312	26.5456	K	2	___1	1	4.25949e-05
P07954-2;P07954	P07954-2	Fumarate hydratase, mitochondrial	FH	TAVGTGLNTRIGFAEKVAAKVAALTGLPFVT	249	30.6102	32.0115	32.3862	31.4934	32.9183	32.8825	33.0036	32.5261	31.5976	32.7856	32.3377	32.5671	33.4884	33.0904	K	2	___1	1	0.00308715
P07954-2;P07954	P07954-2	Fumarate hydratase, mitochondrial	FH	TGLNTRIGFAEKVAAKVAALTGLPFVTAPNK	253	NaN	NaN	NaN	NaN	NaN	NaN	NaN	20.982	NaN	NaN	NaN	NaN	NaN	NaN	K	3	___1	1	2.79573e-05
P07954-2;P07954	P07954-2	Fumarate hydratase, mitochondrial	FH	FKIGGVTERMPTPVIKAFGILKRAAAEVNQD	51	NaN	NaN	NaN	NaN	NaN	NaN	NaN	24.5616	NaN	25.6256	NaN	25.1141	NaN	24.3431	K	3	___1	1	9.14459e-10
P07954-2;P07954	P07954-2	Fumarate hydratase, mitochondrial	FH	DKYYGAQTVRSTMNFKIGGVTERMPTPVIKA	37	29.8687	28.4906	29.5609	29.0853	30.443	30.8445	29.6713	30.6204	28.575	31.0481	29.7742	30.0924	31.2801	30.6736	K	2	___1	1	1.41706e-80
P08133;P08133-2;E5RK69;E7EMC6	P08133	Annexin A6;Annexin	ANXA6	ATRTNAEIRAINEAYKEDYHKSLEDALSSDT	478	21.5592	NaN	NaN	NaN	21.5562	NaN	NaN	NaN	NaN	NaN	NaN	NaN	NaN	NaN	K	3	___1	1	0.00486753
P08133;P08133-2;E5RK69;E7EMC6;E5RFF0;H0YC77	P08133	Annexin A6;Annexin	ANXA6	ADKLYKSMKGAGTDEKTLTRIMVSRSEIDLL	620	NaN	20.1707	20.9564	22.5175	NaN	21.5388	20.5655	NaN	NaN	19.6762	21.3339	NaN	20.6204	NaN	K	2	___1	1	0.000140424
P08133;P08133-2;E5RK69;E7EMC6	P08133	Annexin A6;Annexin	ANXA6	RLILGLMMPPAHYDAKQLKKAMEGAGTDEKA	442	23.6924	NaN	22.9812	24.2876	24.3523	24.0508	NaN	22.8133	21.2882	23.1853	23.5953	23.2171	23.15	22.599	K	3	___1	1	1.24859e-07
P08237;P08237-2;P08237-3;F8VNX2;F8VZQ1;F8VSL1;F8VX13;F8VW30;F8VZI0	P08237	ATP-dependent 6-phosphofructokinase, muscle type	PFKM	FREREGRLRAAYNLVKRGITNLCVIGGDGSL	107	24.5529	20.4343	25.2731	24.8135	24.4076	25.5788	NaN	25.7449	23.355	25.1425	25.7496	24.5179	25.3337	25.3028	K	2	___1	1	0.00147027
P08237;P08237-2;P08237-3	P08237	ATP-dependent 6-phosphofructokinase, muscle type	PFKM	GMRKRALVFQPVAELKDQTDFEHRIPKEQWW	727	23.432	NaN	NaN	NaN	NaN	NaN	NaN	24.2326	NaN	NaN	NaN	NaN	NaN	NaN	K	3	___1	1	1.3182e-20
P08237;P08237-2;P08237-3	P08237	ATP-dependent 6-phosphofructokinase, muscle type	PFKM	FTIRDLQANVEHLVQKMKTTVKRGLVLRNEK	615	23.1939	NaN	NaN	NaN	NaN	NaN	NaN	24.8217	NaN	22.749	22.2234	NaN	NaN	21.684	K	3	___1	1	6.66524e-05
P08237;P08237-2;P08237-3;H0YHB8	P08237	ATP-dependent 6-phosphofructokinase, muscle type	PFKM	DVTKAMDEKKFDEALKLRGRSFMNNWEVYKL	372	24.2094	NaN	23.5127	24.0691	23.4998	24.2045	23.7884	24.9903	22.574	23.9788	24.2193	NaN	23.4665	24.8556	K	2	___1	1	1.5386e-31
P08237;P08237-2;P08237-3	P08237	ATP-dependent 6-phosphofructokinase, muscle type	PFKM	QQGGSPTPFDRNFATKMGAKAMNWMSGKIKE	678	27.3652	25.7519	25.63	26.4724	23.6634	25.8551	25.4469	27.8212	24.3288	25.5829	26.0874	25.5587	26.0743	26.6722	K	2	___1	1	0.00165314
P08238	P08238	Heat shock protein HSP 90-beta	HSP90AB1	KENYKKFYEAFSKNLKLGIHEDSTNRRRLSE	438	NaN	NaN	NaN	22.1152	21.1594	21.3781	NaN	23.4531	NaN	NaN	22.0794	20.2861	20.7199	20.6455	K	3	___1	1	0.00162982
P08559;P08559-2;P08559-4;P08559-3	P08559	Pyruvate dehydrogenase E1 component subunit alpha, somatic form, mitochondrial	PDHA1	MGTSVERAAASTDYYKRGDFIPGLRVDGMDI	244	25.7503	NaN	24.5624	24.1851	24.9308	25.1033	24.0926	27.1072	24.017	25.998	25.1129	24.3241	24.6315	24.0359	K	2	___1	1	3.29159e-05
P08559;P08559-2;P08559-4;P08559-3;Q5JPT9;Q5JPU0;Q5JPU1;Q5JPU2	P08559	Pyruvate dehydrogenase E1 component subunit alpha, somatic form, mitochondrial	PDHA1	EGPPVTTVLTREDGLKYYRMMQTVRRMELKA	63	24.1302	22.7935	21.7026	21.5358	21.6104	21.8514	20.7032	24.5243	22.8588	23.6031	20.9195	22.4658	22.0087	23.1971	K	2	___1	1	0.00209228
P08559;P08559-2;P08559-4;P08559-3;Q5JPT9;Q5JPU0;Q5JPU1;Q5JPU2;P29803	P08559	Pyruvate dehydrogenase E1 component subunit alpha, somatic form, mitochondrial;Pyruvate dehydrogenase E1 component subunit alpha, testis-specific form, mitochondrial	PDHA1;PDHA2	LKYYRMMQTVRRMELKADQLYKQKIIRGFCH	77	NaN	NaN	20.1555	22.0233	20.9283	NaN	19.8092	21.2475	23.6588	NaN	22.4606	22.6514	21.8757	23.5252	K	2	___1	1	6.61647e-05
P08559;P08559-2;P08559-4;P08559-3;Q5JPU3	P08559	Pyruvate dehydrogenase E1 component subunit alpha, somatic form, mitochondrial	PDHA1	KDRMVNSNLASVEELKEIDVEVRKEIEDAAQ	336	24.5637	NaN	NaN	NaN	NaN	NaN	NaN	26.4133	NaN	26.6404	26.2879	25.7549	25.3864	24.3073	K	3	___1	1	2.18314e-253
P08559;P08559-2;P08559-4;P08559-3;Q5JPT9;Q5JPU0;Q5JPU1;Q5JPU2	P08559	Pyruvate dehydrogenase E1 component subunit alpha, somatic form, mitochondrial	PDHA1	LVASRNFANDATFEIKKCDLHRLEEGPPVTT	39	22.3651	22.3462	22.0422	22.6326	23.7676	24.185	21.7751	23.3972	22.5387	21.4291	22.6591	22.5296	23.3865	23.7071	K	2	___1	1	4.18929e-12
P08559;P08559-2;P08559-4;P08559-3;Q5JPU3	P08559	Pyruvate dehydrogenase E1 component subunit alpha, somatic form, mitochondrial	PDHA1	EIQEVRSKSDPIMLLKDRMVNSNLASVEELK	321	28.9694	30.4236	30.289	30.6282	31.1941	29.5821	29.7024	29.8826	30.7564	30.9065	31.3592	31.3716	31.499	30.6581	K	2	___1	1	3.77655e-14
P08574	P08574	Cytochrome c1, heme protein, mitochondrial	CYC1	QDGPNEDGEMFMRPGKLFDYFPKPYPNSEAA	170	NaN	NaN	NaN	NaN	22.5996	NaN	NaN	22.6893	NaN	22.6713	22.4219	22.3592	21.3426	22.6754	K	2	___1	1	0.00150658
P08590	P08590	Myosin light chain 3	MYL3	KEAFMLFDRTPKCEMKITYGQCGDVLRALGQ	70	23.7543	NaN	NaN	21.1703	NaN	21.5337	NaN	22.5377	21.6698	24.4881	23.2407	21.7568	24.0268	23.787	K	2	___1	1	7.21569e-33
P08590;E9PGV7	P08590	Myosin light chain 3	MYL3	PPEPERPKEVEFDASKIKIEFTPEQIEEFKE	41	24.9437	26.2158	24.6731	26.4795	27.2572	25.9858	25.212	25.3892	24.7012	24.6366	25.8918	26.3876	26.0272	26.6891	K	2	___1	1	6.62495e-05
P08590	P08590	Myosin light chain 3	MYL3	GQEDSNGCINYEAFVKHIMSS__________	190	NaN	NaN	NaN	NaN	NaN	NaN	NaN	21.8064	NaN	NaN	NaN	NaN	NaN	NaN	K	3	___1	1	4.6239e-12
P08590	P08590	Myosin light chain 3	MYL3	MMDFETFLPMLQHISKNKDTGTYEDFVEGLR	123	25.1798	NaN	NaN	NaN	NaN	NaN	NaN	25.448	NaN	NaN	NaN	23.9127	NaN	21.2778	K	3	___1	1	1.95282e-27
P08670;B0YJC4;A0A1B0GTT5	P08670	Vimentin	VIM	VELQELNDRFANYIDKVRFLEQQNKILLAEL	120	NaN	NaN	NaN	20.7004	21.5212	20.1864	NaN	22.5145	NaN	NaN	21.081	NaN	21.1815	21.7771	K	2	___1	1	0.0034156
P08670;B0YJC4;B0YJC5	P08670	Vimentin	VIM	LERKVESLQEEIAFLKKLHEEEIQELQAQIQ	235	NaN	NaN	NaN	NaN	NaN	NaN	NaN	22.1825	NaN	NaN	27.0911	NaN	NaN	NaN	K	3	___1	1	9.79698e-05
P08670;B0YJC4;B0YJC5	P08670	Vimentin	VIM	VAAKNLQEAEEWYKSKFADLSEAANRNNDAL	294	21.4172	NaN	23.6594	25.0933	23.8285	24.1441	22.2093	24.1877	22.5199	23.2294	24.5652	23.6291	24.1507	24.4427	K	2	___1	1	4.7932e-12
P08670	P08670	Vimentin	VIM	SLPLVDTHSKRTLLIKTVETRDGQVINETSQ	445	NaN	NaN	NaN	22.3358	21.5269	NaN	NaN	NaN	NaN	NaN	22.3501	NaN	22.7272	NaN	K	2	___1	1	0.000346088
P08670;B0YJC4;A0A1B0GTT5;P17661	P08670;P17661	Vimentin;Desmin	VIM;DES	ADAINTEFKNTRTNEKVELQELNDRFANYID;ADAVNQEFLTTRTNEKVELQELNDRFANYIE	104	22.726	22.1991	NaN	23.6534	23.8087	22.4219	20.1851	23.356	NaN	NaN	23.6839	23.0462	22.1855	23.0995	K	2	___1	1	4.51161e-80
P08758;D6RBL5;E9PHT9	P08758	Annexin A5;Annexin	ANXA5	DLLDDLKSELTGKFEKLIVALMKPSRLYDAY	79	19.8047	NaN	22.2156	23.7743	22.5474	24.2776	22.8504	21.4905	20.7858	23.9271	23.9317	23.8132	23.6163	22.0529	K	2	___1	1	0.00127329
P08758;D6RBL5;E9PHT9	P08758	Annexin A5;Annexin	ANXA5	AYELKHALKGAGTNEKVLTEIIASRTPEELR	108	19.663	21.7867	NaN	NaN	NaN	NaN	NaN	20.67	NaN	NaN	NaN	NaN	NaN	NaN	K	2	___1	1	0.00016387
P08758;D6RBL5;E9PHT9	P08758	Annexin A5;Annexin	ANXA5	FGRDLLDDLKSELTGKFEKLIVALMKPSRLY	76	22.4692	23.9801	NaN	24.0676	NaN	24.1624	23.5425	24.1866	NaN	NaN	23.5513	22.7519	23.2928	23.8634	K	2	___1	1	0.00565173
P09104-2;P09104;F5H0C8;P13929;P13929-2;P13929-3	P09104-2;P13929	Gamma-enolase;Enolase;Beta-enolase	ENO2;ENO3	GQIKTGAPCRSERLAKYNQLMRIEEALGDKA;GQIKTGAPCRSERLAKYNQLMRIEEELGDEA	406	29.3984	24.8124	28.0892	28.6756	29.0104	28.5031	26.9315	30.0932	26.1389	28.3947	29.4822	27.9317	28.7151	28.7763	K	2	___1	1	0.000171761
P09211;A0A087X243	P09211	Glutathione S-transferase P	GSTP1	SLIYTNYEAGKDDYVKALPGQLKPFETLLSQ	121	21.7845	NaN	NaN	NaN	NaN	NaN	NaN	21.8767	NaN	NaN	21.5087	20.6912	20.3805	20.7976	K	2	___1	1	0.00230136
P09382	P09382	Galectin-1	LGALS1	LNLEAINYMAADGDFKIKCVAFD________	128	NaN	NaN	NaN	NaN	NaN	NaN	NaN	NaN	NaN	NaN	24.0433	NaN	22.8303	NaN	K	2	___1	1	8.31166e-28
P09382	P09382	Galectin-1	LGALS1	DQANLTVKLPDGYEFKFPNRLNLEAINYMAA	108	24.1656	23.4464	23.9166	NaN	25.6978	24.1535	NaN	25.2168	NaN	26.0305	NaN	25.3344	NaN	NaN	K	2	___1	1	4.80152e-12
P09493;H0YL52;H0YKP3;A0A087WTJ7;H0YKZ6;P09493-4;P09493-10;P09493-9	P09493;P09493-4;P09493-9	Tropomyosin alpha-1 chain	TPM1	EDRSKQLEDELVSLQKKLKGTEDELDKYSEA	48	26.0924	23.0866	25.2626	26.3685	26.5335	26.4244	24.2887	26.156	25.1607	25.3886	26.4251	25.5364	24.7494	26.1811	K	2	___1	1	3.60439e-208
P09622;P09622-3;F8WDM5;A0A1W2PR83;F2Z2E3	P09622	Dihydrolipoyl dehydrogenase, mitochondrial	DLD	PGGYVAAIKAAQLGFKTVCIEKNETLGGTCL	66	23.8474	NaN	25.1574	21.7662	23.2633	23.6196	23.1348	24.8135	22.0553	25.6328	24.5355	22.0609	24.4645	24.4619	K	2	___1	1	7.16059e-20
P09622;E9PEX6;P09622-3;F8WDM5;A0A1W2PR83;F2Z2E3	P09622	Dihydrolipoyl dehydrogenase, mitochondrial;Dihydrolipoyl dehydrogenase	DLD	KALLNNSHYYHMAHGKDFASRGIEMSEVRLN	104	NaN	NaN	NaN	NaN	NaN	NaN	NaN	23.0287	NaN	NaN	NaN	NaN	NaN	NaN	K	4	___1	1	0.00203341
P09622;E9PEX6;P09622-3;P09622-2	P09622	Dihydrolipoyl dehydrogenase, mitochondrial;Dihydrolipoyl dehydrogenase	DLD	STAVKALTGGIAHLFKQNKVVHVNGYGKITG	143	30.0913	24.5034	27.0284	26.8461	27.8265	28.6103	27.3551	31.584	27.0315	30.617	29.0732	26.024	28.6501	27.9681	K	3	___1	1	1.48665e-190
P09622;E9PEX6;P09622-3;P09622-2	P09622	Dihydrolipoyl dehydrogenase, mitochondrial;Dihydrolipoyl dehydrogenase	DLD	VGKSEEQLKEEGIEYKVGKFPFAANSRAKTN	417	26.7874	NaN	20.6693	22.12	23.141	23.2194	21.0439	25.1579	22.3368	22.5485	24.0767	23.9506	23.2371	23.9777	K	2	___1	1	0.00252811
P09622;E9PEX6;P09622-3;P09622-2	P09622	Dihydrolipoyl dehydrogenase, mitochondrial;Dihydrolipoyl dehydrogenase	DLD	SEEQLKEEGIEYKVGKFPFAANSRAKTNADT	420	29.6611	30.1002	29.3772	28.9585	30.8184	30.1886	29.3352	30.9482	26.4144	30.9296	30.7258	30.7338	30.8371	30.4829	K	2	___1	1	0.000472486
P09622;E9PEX6;P09622-3;P09622-2	P09622	Dihydrolipoyl dehydrogenase, mitochondrial;Dihydrolipoyl dehydrogenase	DLD	QRILQKQGFKFKLNTKVTGATKKSDGKIDVS	277	26.9358	26.3496	25.7311	26.6427	26.348	26.5257	25.0498	27.9345	25.0701	26.6218	26.2423	27.1609	26.3501	26.6625	K	2	___1	1	4.07011e-11
P09622;E9PEX6;P09622-3;P09622-2	P09622	Dihydrolipoyl dehydrogenase, mitochondrial;Dihydrolipoyl dehydrogenase	DLD	GIDMEISKNFQRILQKQGFKFKLNTKVTGAT	267	27.37	24.4707	27.0207	28.378	28.0323	28.4922	28.0073	24.737	27.287	24.5436	28.0097	27.7545	28.2296	28.6153	K	2	___1	1	0.000455463
P09622;E9PEX6;P09622-3;P09622-2	P09622	Dihydrolipoyl dehydrogenase, mitochondrial;Dihydrolipoyl dehydrogenase	DLD	ASRGIEMSEVRLNLDKMMEQKSTAVKALTGG	122	27.1213	25.2524	24.8584	26.309	25.9202	26.1641	25.6669	27.31	25.5941	27.5179	27.704	26.5595	27.071	27.0995	K	2	___1	1	2.75013e-16
P09622;E9PEX6;P09622-3;P09622-2	P09622	Dihydrolipoyl dehydrogenase, mitochondrial;Dihydrolipoyl dehydrogenase	DLD	THPEVAWVGKSEEQLKEEGIEYKVGKFPFAA	410	26.7651	25.4701	24.9814	24.9573	26.6744	26.4928	25.2295	28.1286	24.8752	27.1253	26.5075	25.9358	26.3485	26.657	K	2	___1	1	3.81978e-109
P09622;E9PEX6;P09622-3;P09622-2	P09622	Dihydrolipoyl dehydrogenase, mitochondrial;Dihydrolipoyl dehydrogenase	DLD	RLNLDKMMEQKSTAVKALTGGIAHLFKQNKV	132	23.2094	NaN	NaN	NaN	NaN	NaN	NaN	23.9839	NaN	NaN	NaN	NaN	NaN	NaN	K	3	___1	1	2.03038e-58
P09960-4;P09960;P09960-3;P09960-2	P09960-4	Leukotriene A-4 hydrolase	LTA4H	GGPEIFLGFLKAYVEKFSYKSITTDDWKDFL	390	NaN	NaN	NaN	NaN	NaN	NaN	NaN	NaN	NaN	NaN	21.8114	NaN	21.0192	NaN	K	2	___1	1	0.0054523
P09960-4;P09960	P09960-4	Leukotriene A-4 hydrolase	LTA4H	MATEQGRMKFTRPLFKDLAAFDKSHDQAVRT	549	NaN	NaN	NaN	NaN	NaN	NaN	NaN	21.9249	NaN	NaN	NaN	NaN	NaN	NaN	K	3	___1	1	0.00481475
P09972;K7EKH5;C9J8F3;J3KSV6;J3QKP5;A8MVZ9	P09972	Fructose-bisphosphate aldolase C;Fructose-bisphosphate aldolase	ALDOC	RTIQDKGIVVGIKVDKGVVPLAGTDGETTTQ	111	NaN	NaN	NaN	NaN	NaN	NaN	NaN	22.2567	24.1369	NaN	21.616	NaN	NaN	NaN	K	3	___1	1	1.37985e-18
Q71UI9;P0C0S5;Q71UI9-3;Q71UI9-4	Q71UI9	Histone H2A.V;Histone H2A.Z	H2AFV;H2AFZ	IKATIAGGGVIPHIHKSLIGKKGQQKTA___	116	22.4127	NaN	NaN	NaN	NaN	NaN	NaN	21.6717	NaN	NaN	NaN	NaN	NaN	NaN	K	4	___1	1	3.42281e-05
P0C7P0	P0C7P0	CDGSH iron-sulfur domain-containing protein 3, mitochondrial	CISD3	CDGSHFFQRTGLSPLKFKAQETRMVALCTCK	86	NaN	NaN	NaN	NaN	NaN	NaN	NaN	22.0102	NaN	23.5651	NaN	NaN	NaN	21.2747	K	2	___1	1	0.00506008
P0DOY3;P0DOY2	P0DOY3			PGAVTVAWKADSSPVKAGVETTTPSKQSNNK	50	NaN	NaN	NaN	21.7723	NaN	NaN	NaN	NaN	20.6476	NaN	20.6034	21.5648	20.9827	20.6957	K	2	___1	1	2.29489e-22
P10412;P16402;P16403;P22492;Q02539	P10412;P16402;P16403;Q02539	Histone H1.4;Histone H1.3;Histone H1.2;Histone H1t;Histone H1.1	HIST1H1E;HIST1H1D;HIST1H1C;HIST1H1T;HIST1H1A	AALKKALAAAGYDVEKNNSRIKLGIKSLVSK;AALKKALAAAGYDVEKNNSRIKLGLKSLVSK	75	NaN	21.2437	NaN	NaN	NaN	NaN	NaN	NaN	NaN	NaN	NaN	NaN	NaN	NaN	K	2	___1	1	3.98702e-05
P10412;P16402;P16403	P10412;P16402;P16403	Histone H1.4;Histone H1.3;Histone H1.2	HIST1H1E;HIST1H1D;HIST1H1C	AKRKASGPPVSELITKAVAASKERSGVSLAA;GKRKASGPPVSELITKAVAASKERSGVSLAA;TPRKASGPPVSELITKAVAASKERSGVSLAA	46	24.395	26.02	24.1824	27.8573	27.1234	26.4137	26.5238	24.9133	22.974	26.3093	27.1179	27.2502	26.9986	27.1381	K	2	___1	1	4.26598e-94
P10412;P16401;P16402;P16403;Q02539	P10412;P16401;P16402;P16403;Q02539	Histone H1.4;Histone H1.5;Histone H1.3;Histone H1.2;Histone H1.1	HIST1H1E;HIST1H1B;HIST1H1D;HIST1H1C;HIST1H1A	GTLVQTKGTGASGSFKLNKKAASGEAKPKAK;GTLVQTKGTGASGSFKLNKKAASGEAKPKVK;GTLVQTKGTGASGSFKLNKKAASGEGKPKAK;GTLVQTKGTGASGSFKLNKKASSVETKPGAS	106	23.5012	20.3877	24.4062	25.6992	25.2584	25.035	25.0915	26.5238	23.8309	24.87	26.0726	22.2941	25.2961	25.0673	K	2	___1	1	2.66272e-17
P10412	P10412	Histone H1.4	HIST1H1E	SETAPAAPAAPAPAEKTPVKKKARKSAGAAK	17	26.7705	25.2086	24.0233	25.3174	25.3871	25.0653	23.6281	24.8621	24.3438	24.1826	25.8511	26.1276	22.0439	25.187	K	3	___1	1	6.02629e-42
P10412	P10412	Histone H1.4	HIST1H1E	PAAPAAPAPAEKTPVKKKARKSAGAAKRKAS	21	NaN	NaN	NaN	NaN	NaN	NaN	22.0594	NaN	NaN	NaN	NaN	NaN	NaN	NaN	K	3	___1	0.628074	2.66576e-06
P10599;P10599-2	P10599	Thioredoxin	TXN	EVKCMPTFQFFKKGQKVGEFSGANKEKLEAT	85	NaN	NaN	NaN	NaN	NaN	NaN	NaN	NaN	NaN	NaN	NaN	20.2063	NaN	NaN	K	2	___1	1	0.00133857
P10606	P10606	Cytochrome c oxidase subunit 5B, mitochondrial	COX5B	HKGEAQRCPRCGAHYKLVPQQLAH_______	121	27.4778	NaN	NaN	21.0633	22.7581	22.3107	NaN	27.5388	NaN	27.9467	25.8832	21.0649	25.7483	25.5078	K	3	___1	1	1.67313e-36
P10606	P10606	Cytochrome c oxidase subunit 5B, mitochondrial	COX5B	SGTREDPNLVPSISNKRIVGCICEEDNTSVV	86	28.7744	23.1785	27.9596	25.2394	28.6755	29.3864	27.9934	28.9806	29.6378	29.3769	28.6452	26.9546	23.7743	29.9364	K	3	___1	1	7.07693e-09
P10606	P10606	Cytochrome c oxidase subunit 5B, mitochondrial	COX5B	EEQATGLEREIMLAAKKGLDPYNVLAPKGAS	56	29.9854	28.5298	29.4145	29.1387	27.343	29.9431	29.2068	30.3711	29.2722	30.3687	29.7994	28.0912	30.0607	29.939	K	2	___1	1	0.0022481
P10606	P10606	Cytochrome c oxidase subunit 5B, mitochondrial	COX5B	EQATGLEREIMLAAKKGLDPYNVLAPKGASG	57	24.0015	NaN	NaN	NaN	NaN	NaN	NaN	20.5049	NaN	NaN	NaN	NaN	NaN	NaN	K	2	___1	1	0.00055251
P10768;X6RA14;H7BZT7;U3KQT1	P10768	S-formylglutathione hydrolase	ESD	TDQSKWKAYDATHLVKSYPGSQLDILIDQGK	209	23.2096	NaN	NaN	NaN	NaN	NaN	NaN	22.0882	NaN	NaN	NaN	NaN	NaN	NaN	K	3	___1	1	1.59602e-24
P10768;X6RA14	P10768	S-formylglutathione hydrolase	ESD	QKVFEHDSVELNCKMKFAVYLPPKAETGKCP	31	NaN	NaN	22.9501	23.6633	23.3529	23.8159	22.9818	20.8527	NaN	23.7587	23.36	NaN	23.1633	22.5548	K	2	___1	1	0.0011155
P10809	P10809	60 kDa heat shock protein, mitochondrial	HSPD1	KVGEVIVTKDDAMLLKGKGDKAQIEKRIQEI	359	23.2181	21.6666	NaN	21.6361	22.7746	23.3048	21.7348	23.8001	NaN	22.6136	22.8635	22.3827	22.4017	21.9671	K	2	___1	1	0.000995266
P10809;E7EXB4;E7ESH4;P10809-2;C9JL25;C9JCQ4	P10809	60 kDa heat shock protein, mitochondrial	HSPD1	SWGSPKVTKDGVTVAKSIDLKDKYKNIGAKL	82	NaN	NaN	NaN	22.2312	NaN	23.651	22.2438	23.0706	NaN	20.7124	NaN	NaN	22.9334	23.2461	K	2	___1	1	0.00207347
P10809;E7EXB4;E7ESH4;P10809-2;C9JL25;C9JCQ4;C9J0S9;C9JL19;F8WBB1	P10809	60 kDa heat shock protein, mitochondrial	HSPD1	RVLAPHLTRAYAKDVKFGADARALMLQGVDL	31	25.7498	NaN	NaN	NaN	NaN	24.6426	NaN	25.5157	NaN	NaN	NaN	NaN	23.8394	NaN	K	2	___1	1	0.00220414
P10809;E7EXB4;E7ESH4	P10809	60 kDa heat shock protein, mitochondrial	HSPD1	ANGDKEIGNIISDAMKKVGRKGVITVKDGKT	191	26.2365	22.7063	25.7958	26.2114	26.8809	27.3034	26.9953	27.5673	26.0152	29.001	27.1887	26.3693	27.3953	27.7912	K	2	___1	1	2.73231e-13
P10809	P10809	60 kDa heat shock protein, mitochondrial	HSPD1	IVTKDDAMLLKGKGDKAQIEKRIQEIIEQLD	364	NaN	NaN	NaN	NaN	NaN	NaN	NaN	NaN	22.0289	NaN	NaN	21.6973	21.897	22.0124	K	2	___1	1	0.000387978
P10809;E7EXB4	P10809	60 kDa heat shock protein, mitochondrial	HSPD1	SDAMKKVGRKGVITVKDGKTLNDELEIIEGM	202	25.5523	26.0719	25.9289	26.0901	25.4503	26.5721	25.8983	27.0903	20.0854	24.9826	26.9308	26.5508	27.2231	26.8057	K	2	___1	1	0.000426158
P10809;E7EXB4;E7ESH4	P10809	60 kDa heat shock protein, mitochondrial	HSPD1	RRGVMLAVDAVIAELKKQSKPVTTPEEIAQV	156	NaN	NaN	NaN	NaN	NaN	NaN	NaN	NaN	NaN	21.9087	24.8328	NaN	NaN	NaN	K	3	___1	1	1.91975e-05
P10809	P10809	60 kDa heat shock protein, mitochondrial	HSPD1	LTPANEDQKIGIEIIKRTLKIPAMTIAKNAG	469	25.5406	NaN	24.9565	24.6508	26.2095	26.7538	26.2125	26.768	23.6932	28.0074	26.0852	20.1777	25.5255	25.5427	K	2	___1	1	3.47968e-06
P10809	P10809	60 kDa heat shock protein, mitochondrial	HSPD1	TTSEYEKEKLNERLAKLSDGVAVLKVGGTSD	396	26.052	NaN	24.4234	24.8246	25.8078	26.5743	26.3032	25.6964	23.3951	27.0003	26.1802	23.8597	26.2583	26.3135	K	2	___1	1	9.65246e-10
P10809	P10809	60 kDa heat shock protein, mitochondrial	HSPD1	NEDQKIGIEIIKRTLKIPAMTIAKNAGVEGS	473	27.2938	28.3409	28.4108	28.2021	29.4897	29.3719	29.3686	28.931	26.4111	30.0971	28.9145	29.0695	29.8369	30.179	K	2	___1	1	5.5324e-07
P10809	P10809	60 kDa heat shock protein, mitochondrial	HSPD1	AVLKVGGTSDVEVNEKKDRVTDALNATRAAV	417	23.0811	20.3608	21.6126	21.9909	21.805	23.1935	22.2353	24.8539	NaN	22.3993	23.1617	22.0695	22.0629	22.4122	K	2	___1	1	4.64102e-80
P10809	P10809	60 kDa heat shock protein, mitochondrial	HSPD1	LVLNRLKVGLQVVAVKAPGFGDNRKNQLKDM	301	19.0283	NaN	NaN	NaN	NaN	NaN	NaN	20.6979	NaN	23.2209	21.824	22.6381	22.7734	22.5345	K	3	___1	1	1.5173e-41
P10916;G3V1V8	P10916	Myosin regulatory light chain 2, ventricular/cardiac muscle isoform	MYL2	KLKGADPEETILNAFKVFDPEGKGVLKADYV	104	NaN	24.9064	22.5965	NaN	22.9771	22.7533	NaN	NaN	NaN	24.6731	25.4116	23.6281	21.7784	NaN	K	3	___1	1	1.5558e-59
P10916;G3V1V8	P10916	Myosin regulatory light chain 2, ventricular/cardiac muscle isoform	MYL2	LNAFKVFDPEGKGVLKADYVREMLTTQAERF	115	24.4196	20.6933	NaN	26.6081	26.7512	26.0689	25.1943	20.3622	25.839	20.3494	25.8407	22.4085	25.9075	26.8859	K	2	___1	1	0.0082065
P10916;G3V1V8	P10916	Myosin regulatory light chain 2, ventricular/cardiac muscle isoform	MYL2	LDYKNLVHIITHGEEKD______________	165	29.5342	23.4319	24.0268	24.8224	25.9882	25.4739	24.8688	30.0317	20.9253	25.2326	24.2768	23.4149	24.1881	23.7343	K	2	___1	1	9.33542e-55
P10916;G3V1V8	P10916	Myosin regulatory light chain 2, ventricular/cardiac muscle isoform	MYL2	NDLRDTFAALGRVNVKNEEIDEMIKEAPGPI	62	25.1671	25.2918	24.5183	26.4484	26.6424	26.3363	24.9379	25.8482	24.3659	24.7189	25.534	27.2273	25.8279	25.9826	K	2	___1	1	1.26144e-36
P11021	P11021	78 kDa glucose-regulated protein	HSPA5	KNQLTSNPENTVFDAKRLIGRTWNDPSVQQD	96	NaN	NaN	NaN	19.496	20.5949	NaN	NaN	NaN	NaN	NaN	NaN	NaN	NaN	NaN	K	2	___1	1	2.90448e-05
P11055;P12882;Q9UKX2;Q9UKX2-2;Q9UKX3;Q9Y623	P11055;P12882;Q9UKX2;Q9UKX3;Q9Y623	Myosin-3;Myosin-1;Myosin-2;Myosin-13;Myosin-4	MYH3;MYH1;MYH2;MYH13;MYH4	EEAAERADIAESQVNKLRAKSRDVGSQKMEE;EEAEERADIAESQVNKLRAKTRDFTSSRMVV;EEAEERADIAESQVNKLRVKSREVHTKIISE;EEAEERADIAESQVNKLRVKSREVHTKVISE;EEAKERADIAESQVNKLRVKSREVHTKVISE	NaN	27.644	28.9735	28.8642	28.3314	28.6569	28.744	28.6327	27.7622	27.5751	28.5012	27.8586	27.7263	28.61	29.0541	K	2	___1	1	8.94064e-74
P11055;P12882;Q9UKX2;Q9Y623	P11055;P12882;Q9UKX2;Q9Y623	Myosin-3;Myosin-1;Myosin-2;Myosin-4	MYH3;MYH1;MYH2;MYH4	ERAEDEEEINAELTAKKRKLEDECSELKKDI	945	23.5087	23.6862	23.9627	24.8421	23.7499	25.2885	24.7534	24.5999	23.435	22.9832	23.9434	23.2212	24.3071	25.2536	K	2	___1	1	9.85504e-75
P11055;P12882;P12883;P13533;Q9UKX2;Q9UKX3;Q9Y623	P11055;P12882;P12883;P13533;Q9UKX2;Q9UKX3;Q9Y623	Myosin-3;Myosin-1;Myosin-7;Myosin-6;Myosin-2;Myosin-13;Myosin-4	MYH3;MYH1;MYH7;MYH6;MYH2;MYH13;MYH4	AKKAITDAAMMAEELKKEQDTSAHLERMKKN	1770	25.3841	25.7687	25.6911	26.9409	26.9621	26.6248	25.5235	25.8685	25.7694	25.6636	26.1696	25.5563	26.413	26.9602	K	3	___1	1	3.7299e-37
P11055;P12882;P12883;P13533;Q9UKX2;Q9Y623	P11055;P12882;P12883;P13533;Q9UKX2;Q9Y623	Myosin-3;Myosin-1;Myosin-7;Myosin-6;Myosin-2;Myosin-4	MYH3;MYH1;MYH7;MYH6;MYH2;MYH4	SELKKDIDDLELTLAKVEKEKHATENKVKNL;SELKRDIDDLELTLAKVEKEKHATENKVKNL	963	23.6165	NaN	NaN	NaN	NaN	NaN	NaN	22.1384	NaN	NaN	NaN	NaN	NaN	NaN	K	3	___1	1	4.07741e-24
P11055;P12882;P12883;P13533;Q9UKX2;Q9UKX3;Q9Y623	P11055;P12882;P12883;P13533;Q9UKX2;Q9UKX3;Q9Y623	Myosin-3;Myosin-1;Myosin-7;Myosin-6;Myosin-2;Myosin-13;Myosin-4	MYH3;MYH1;MYH7;MYH6;MYH2;MYH13;MYH4	DIDDLELTLAKVEKEKHATENKVKNLTEELS;DIDDLELTLAKVEKEKHATENKVKNLTEEMA;DIDDLELTLTKVEKEKHATENKVKNLSEEMT	968	25.2241	22.8439	NaN	NaN	21.2245	20.1164	NaN	24.8496	22.1198	NaN	NaN	NaN	NaN	22.7989	K	2	___1	1	1.19765e-52
P11055;Q9UKX2	P11055;Q9UKX2	Myosin-3;Myosin-2	MYH3;MYH2	PLLKSAETEKEMATMKEEFQKIKDELAKSEA;PLLKSAETEKEMATMKEEFQKTKDELAKSEA	859	NaN	19.4993	NaN	20.9468	NaN	21.4781	NaN	NaN	20.2406	NaN	NaN	NaN	17.8672	NaN	K	2	___1	1	0.000590604
P11055	P11055	Myosin-3	MYH3	ELTQVKSEIDRKIAEKDEEIEQLKRNYQRTV	1580	NaN	NaN	NaN	NaN	NaN	NaN	NaN	NaN	NaN	21.7871	NaN	NaN	NaN	NaN	K	2	___1	1	0.00722046
P11055;P12882;P13533;Q9UKX2;Q9Y623	P11055;P12882;P13533;Q9UKX2;Q9Y623	Myosin-3;Myosin-1;Myosin-6;Myosin-2;Myosin-4	MYH3;MYH1;MYH6;MYH2;MYH4	EDEEEINAELTAKKRKLEDECSELKKDIDDL;EDEEEMNAELTAKKRKLEDECSELKKDIDDL	948	23.895	NaN	NaN	NaN	NaN	NaN	NaN	21.4047	NaN	NaN	NaN	NaN	NaN	NaN	K	3	___1	1	0.00600916
P11055;P12882;P13533;Q9UKX2;Q9Y623	P11055;P12882;P13533;Q9UKX2;Q9Y623	Myosin-3;Myosin-1;Myosin-6;Myosin-2;Myosin-4	MYH3;MYH1;MYH6;MYH2;MYH4	LTAKKRKLEDECSELKKDIDDLELTLAKVEK	957	27.5552	NaN	23.2149	23.6926	21.2084	23.0184	19.7716	25.7801	24.0807	24.1571	24.3295	22.9618	23.8165	24.4499	K	2	___1	1	2.20801e-44
P11055;P12882;P12883;P13533;Q9UKX2;Q9UKX2-2;Q9UKX3;Q9Y623	P11055;P12882;P12883;P13533;Q9UKX2;Q9UKX3;Q9Y623	Myosin-3;Myosin-1;Myosin-7;Myosin-6;Myosin-2;Myosin-13;Myosin-4	MYH3;MYH1;MYH7;MYH6;MYH2;MYH13;MYH4	TGKLASADIETYLLEKSRVIFQLKAERDYHI;TGKLASADIETYLLEKSRVIFQLKAERNYHI;TGKLASADIETYLLEKSRVTFQLKAERSYHI;TGKLASADIETYLLEKSRVTFQLSSERSYHI;TGKLASADIETYLLEKSRVVFQLKAERSYHI	270	23.5179	NaN	NaN	NaN	NaN	23.9654	24.2832	23.0796	NaN	24.3189	24.5915	NaN	24.6688	23.272	K	3	___1	1	1.9227e-196
P11055;P13533;Q9UKX2	P11055;P13533;Q9UKX2	Myosin-3;Myosin-6;Myosin-2	MYH3;MYH6;MYH2	LFFKIKPLLKSAETEKEMATMKEEFQKIKDE;LFFKIKPLLKSAETEKEMATMKEEFQKTKDE;LYFKIKPLLKSAETEKEMATMKEEFGRIKET	853	NaN	20.6271	19.379	22.5971	NaN	20.5975	NaN	20.7224	NaN	NaN	18.7774	18.9514	NaN	NaN	K	2	___1	1	3.823e-06
P11055;P12882;P12883;P13533;Q9UKX2;Q9UKX3;Q9Y623	P11055;P12882;P12883;P13533;Q9UKX2;Q9UKX3;Q9Y623	Myosin-3;Myosin-1;Myosin-7;Myosin-6;Myosin-2;Myosin-13;Myosin-4	MYH3;MYH1;MYH7;MYH6;MYH2;MYH13;MYH4	YETDAIQRTEELEEAKKKLAQRLQAAEEHVE;YETDAIQRTEELEEAKKKLAQRLQDAEEAVE;YETDAIQRTEELEEAKKKLAQRLQDAEEHVE;YETDAIQRTEELEEAKKKLAQRLQDSEEQVE;YETDAIQRTEELEEAKKKLAQRLQEAEEAVE;YETDAIQRTEELEEAKKKLAQRLQEAEENTE	1390	28.6014	26.689	26.9604	27.6865	26.1632	27.3777	26.8559	28.2429	26.1002	26.2434	26.3683	26.8937	26.7407	26.6845	K	2	___1	1	0.000311575
P11055;P12882;P12883;P13533;Q9UKX2;Q9UKX3;Q9Y623	P11055;P12882;P12883;P13533;Q9UKX2;Q9UKX3;Q9Y623	Myosin-3;Myosin-1;Myosin-7;Myosin-6;Myosin-2;Myosin-13;Myosin-4	MYH3;MYH1;MYH7;MYH6;MYH2;MYH13;MYH4	ETDAIQRTEELEEAKKKLAQRLQAAEEHVEA;ETDAIQRTEELEEAKKKLAQRLQDAEEAVEA;ETDAIQRTEELEEAKKKLAQRLQDAEEHVEA;ETDAIQRTEELEEAKKKLAQRLQDSEEQVEA;ETDAIQRTEELEEAKKKLAQRLQEAEEAVEA;ETDAIQRTEELEEAKKKLAQRLQEAEENTET	1391	NaN	21.0738	22.4967	22.8147	22.2746	22.7759	21.0527	21.3206	20.3746	19.7729	21.6514	22.9988	21.6966	21.5734	K	3	___1	0.610028	0.00155248
P11055;P12882;P12883;Q9H6N6;P13533;Q9UKX2;Q9UKX3;Q9Y623	P11055;P12882;P12883;P13533;Q9UKX2;Q9UKX3;Q9Y623	Myosin-3;Myosin-1;Myosin-7;Putative uncharacterized protein MYH16;Myosin-6;Myosin-2;Myosin-13;Myosin-4	MYH3;MYH1;MYH7;MYH16;MYH6;MYH2;MYH13;MYH4	RALSKANSEVAQWRTKYETDAIQRTEELEEA;RALSKANTEVAQWRTKYETDAIQRTEELEEA;RAMSKANSEVAQWRTKYETDAIQRTEELEEA;RGMSKANSEVAQWRTKYETDAIQRTEELEEA;RVLSKANSEVAQWRTKYETDAIQRTEELEEA	1374	26.4305	23.8095	25.7547	27.115	26.1992	26.6284	25.8985	26.8982	27.233	25.5597	26.8643	26.3171	26.3978	26.6006	K	2	___1	1	0.000119478
P11055;P12882;Q9UKX2;Q9Y623	P11055;P12882;Q9UKX2;Q9Y623	Myosin-3;Myosin-1;Myosin-2;Myosin-4	MYH3;MYH1;MYH2;MYH4	VLNASAIPEGQFIDSKKACEKLLASIDIDHT;VLNASAIPEGQFIDSKKASEKLLASIDIDHT;VLNASAIPEGQFIDSKKASEKLLGSIDIDHT;VLNASAIPEGQFIDSKKASEKLLGSIEIDHT	745	26.7941	24.9318	27.8611	26.3067	27.5738	27.448	27.9223	23.6162	27.6602	26.9014	27.2662	26.539	27.2708	27.9293	K	3	___1	1	2.9741e-42
P11142;E9PKE3;E9PNE6;A8K7Q2;E9PS65	P11142	Heat shock cognate 71 kDa protein	HSPA8	TAEKEEFEHQQKELEKVCNPIITKLYQSAGG	601	23.9044	NaN	NaN	23.2919	NaN	23.5815	20.3975	23.9791	NaN	21.4913	23.9505	22.5744	23.8688	24.6687	K	2	___1	1	5.53188e-12
P11142;E9PKE3;E9PNE6;P11142-2;A8K7Q2;E9PN89	P11142	Heat shock cognate 71 kDa protein	HSPA8	ELNADLFRGTLDPVEKALRDAKLDKSQIHDI	319	23.7569	23.4334	24.6234	25.3429	25.0485	25.7001	24.3273	25.1911	24.3734	NaN	25.0768	24.0052	24.4704	25.2885	K	2	___1	1	9.5277e-06
P11142;E9PKE3;P11142-2;E9PN89;E9PI65;P54652	P11142;P54652	Heat shock cognate 71 kDa protein;Heat shock-related 70 kDa protein 2	HSPA8;HSPA2	IINEPTAAAIAYGLDKKGCAGGEKNVLIFDL;IINEPTAAAIAYGLDKKVGAERNVLIFDLGG	187	24.1061	NaN	25.1131	26.9668	26.0518	26.1784	23.8129	24.6765	22.7712	26.0812	25.9514	21.6624	25.4762	24.9053	K	3	___1	1	3.31985e-27
P11142;E9PKE3;E9PNE6;P11142-2;A8K7Q2;E9PN89;P54652	P11142;P54652	Heat shock cognate 71 kDa protein;Heat shock-related 70 kDa protein 2	HSPA8;HSPA2	DIVLVGGSTRIPKIQKLLQDFFNGKELNKSI;EIVLVGGSTRIPKIQKLLQDFFNGKELNKSI	348	25.1289	NaN	25.2157	26.0394	25.2492	25.2479	24.2567	25.7169	NaN	26.34	22.077	NaN	23.478	22.2261	K	2	___1	1	5.83026e-140
P11142;E9PKE3;E9PNE6;A8K7Q2;E9PS65;E9PM13;P54652	P11142;P54652	Heat shock cognate 71 kDa protein;Heat shock-related 70 kDa protein 2	HSPA8;HSPA2	DKSTGKENKITITNDKGRLSKDDIDRMVQEA;DKSTGKENKITITNDKGRLSKEDIERMVQEA	507	23.1373	23.6467	22.6865	24.6342	21.9039	22.9481	NaN	23.8765	NaN	NaN	NaN	NaN	22.371	NaN	K	2	___1	1	0.000363379
P11142;E9PKE3;E9PNE6;P11142-2;A8K7Q2;E9PN89	P11142	Heat shock cognate 71 kDa protein	HSPA8	TLDPVEKALRDAKLDKSQIHDIVLVGGSTRI	328	NaN	NaN	NaN	NaN	NaN	NaN	NaN	21.2589	NaN	NaN	23.7181	NaN	23.0975	23.7373	K	3	___1	1	4.82258e-07
P11142;E9PKE3;P11142-2;A8K7Q2;E9PN89	P11142	Heat shock cognate 71 kDa protein	HSPA8	EDFDNRMVNHFIAEFKRKHKKDISENKRAVR	246	24.7776	NaN	NaN	NaN	NaN	NaN	NaN	25.4435	NaN	22.0371	NaN	NaN	NaN	NaN	K	3	___1	1	0.0001685
P11142;E9PKE3;E9PNE6;A8K7Q2;E9PS65;E9PM13	P11142	Heat shock cognate 71 kDa protein	HSPA8	CNEIINWLDKNQTAEKEEFEHQQKELEKVCN	589	24.1108	21.7953	NaN	23.3266	22.8054	23.3465	NaN	25.0881	NaN	NaN	20.3822	20.4836	21.4143	NaN	K	3	___1	1	1.32524e-06
P11142;E9PKE3;E9PNE6;P11142-2;E9PLF4;E9PQQ4;E9PQK7;E9PK54;E9PPY6;E9PN25	P11142	Heat shock cognate 71 kDa protein	HSPA8	KNQVAMNPTNTVFDAKRLIGRRFDDAVVQSD	71	21.499	23.1896	23.0504	24.4006	24.8584	23.5666	22.4053	23.8965	21.8244	20.3509	24.3374	22.5015	24.0906	23.9598	K	2	___1	1	4.43343e-53
P11177-2;P11177;P11177-3;C9J634;F8WF02	P11177-2	Pyruvate dehydrogenase E1 component subunit beta, mitochondrial	PDHB	DAINQGMDEELERDEKVFLLGEEVAQYDGAY	34	NaN	NaN	NaN	NaN	NaN	NaN	NaN	20.2506	NaN	NaN	NaN	NaN	NaN	NaN	K	3	___1	1	6.24695e-07
P11182;Q5VVL7	P11182	Lipoamide acyltransferase component of branched-chain alpha-keto acid dehydrogenase complex, mitochondrial	DBT	PPPKPKDMTVPILVSKPPVFTGKDKTEPIKG	243	NaN	NaN	NaN	NaN	NaN	NaN	NaN	20.8619	NaN	NaN	NaN	NaN	NaN	NaN	K	3	___1	1	0.00109219
P11182;Q5VVL7	P11182	Lipoamide acyltransferase component of branched-chain alpha-keto acid dehydrogenase complex, mitochondrial	DBT	KLREELKPIAFARGIKLSFMPFFLKAASLGL	304	NaN	NaN	NaN	24.4354	23.0224	NaN	NaN	NaN	NaN	NaN	25.1611	NaN	NaN	NaN	K	2	___1	1	0.000314435
P11216;P11217;P11217-2;E9PK47;P06737-2;P06737	P11216;P11217	Glycogen phosphorylase, brain form;Glycogen phosphorylase, muscle form;Alpha-1,4 glucan phosphorylase;Glycogen phosphorylase, liver form	PYGB;PYGM;PYGL	ELKKNFNRHLHFTLVKDRNVATPRDYYFALA;EVRKSFNRHLHFTLVKDRNVATPRDYFFALA	42	NaN	NaN	NaN	NaN	NaN	NaN	NaN	23.5724	NaN	NaN	NaN	NaN	NaN	NaN	K	3	___1	1	0.000526251
P11216;P11217;P11217-2	P11216;P11217	Glycogen phosphorylase, brain form;Glycogen phosphorylase, muscle form	PYGB;PYGM	VAATLQDIIRRFKSSKFGCRDPVRTCFETFP;VAATLQDIIRRFKSSKFGCRDPVRTNFDAFP	316	23.9922	NaN	NaN	NaN	NaN	NaN	NaN	25.0052	NaN	21.7198	22.5062	NaN	22.2201	NaN	K	3	___1	1	0.00403437
P11216;P11217;P11217-2;E9PK47;P06737-2;P06737	P11216;P11217	Glycogen phosphorylase, brain form;Glycogen phosphorylase, muscle form;Alpha-1,4 glucan phosphorylase;Glycogen phosphorylase, liver form	PYGB;PYGM;PYGL	NISRVLYPNDNFFEGKELRLKQEYFVVAATL	290	20.7222	NaN	NaN	NaN	NaN	NaN	NaN	21.6914	NaN	NaN	NaN	NaN	NaN	NaN	K	3	___1	1	6.87832e-05
P11217;P11217-2	P11217	Glycogen phosphorylase, muscle form	PYGM	TVMIGGKAAPGYHMAKMIIRLVTAIGDVVNH	618	20.8669	NaN	21.2073	NaN	NaN	NaN	NaN	22.7561	NaN	23.1747	22.1557	NaN	21.4429	20.0821	K	3	___1	1	0.000905657
P11217;P11217-2	P11217	Glycogen phosphorylase, muscle form	PYGM	FKVFADYEDYIKCQEKVSALYKNPREWTRMV	787	24.5692	NaN	21.5519	21.1741	NaN	22.2167	21.2977	22.7824	21.2368	22.46	23.5	NaN	23.1629	23.7306	K	2	___1	1	7.32251e-06
P11217;P11217-2	P11217	Glycogen phosphorylase, muscle form	PYGM	YEDYIKCQEKVSALYKNPREWTRMVIRNIAT	793	28.3206	23.4769	27.498	27.3867	26.3049	27.7659	23.4057	28.6929	22.2808	27.2059	27.6169	26.6339	27.862	27.269	K	2	___1	1	0.000362208
P11217;P11217-2	P11217	Glycogen phosphorylase, muscle form	PYGM	LKKTIFKDFYELEPHKFQNKTNGITPRRWLV	479	22.7171	NaN	NaN	NaN	NaN	NaN	NaN	22.297	NaN	NaN	NaN	NaN	NaN	NaN	K	3	___1	1	1.85755e-05
P11217;P11217-2	P11217	Glycogen phosphorylase, muscle form	PYGM	LHVITLYNRIKREPNKFFVPRTVMIGGKAAP	597	28.7036	23.5378	27.765	28.4612	28.4553	28.5662	27.9697	29.3669	24.7919	28.6459	28.7521	24.5138	28.2182	29.2588	K	2	___1	1	0.00220676
P11217;P11217-2	P11217	Glycogen phosphorylase, muscle form	PYGM	ISVRGLAGVENVTELKKNFNRHLHFTLVKDR	29	26.8202	26.1461	26.8007	27.5947	27.4371	27.8442	25.4683	27.6735	25.5363	25.5732	27.5195	26.207	27.0833	25.5768	K	2	___1	1	2.93586e-15
P11217;P11217-2	P11217	Glycogen phosphorylase, muscle form	PYGM	SHAVNGVARIHSEILKKTIFKDFYELEPHKF	465	26.4451	25.5264	25.1489	25.938	25.495	26.2168	25.3782	27.3377	24.1565	25.6334	26.2122	24.0932	25.1179	25.9726	K	3	___1	1	0.000375033
P11217;P11217-2	P11217	Glycogen phosphorylase, muscle form	PYGM	AFIRDVAKVKQENKLKFAAYLEREYKVHINP	545	22.6213	24.1846	23.5593	24.6972	NaN	23.796	NaN	23.5123	NaN	NaN	NaN	NaN	24.8052	23.0575	K	2	___1	1	0.00733393
P11217;P11217-2	P11217	Glycogen phosphorylase, muscle form	PYGM	VDRLRRMSLVEEGAVKRINMAHLCIAGSHAV	438	23.4136	23.9589	24.6353	25.5949	25.2643	25.3896	24.7723	25.2043	22.9987	23.9965	25.218	23.2516	24.8059	25.627	K	2	___1	1	1.11197e-08
P11217;P11217-2	P11217	Glycogen phosphorylase, muscle form	PYGM	REWTRMVIRNIATSGKFSSDRTIAQYAREIW	811	26.4705	23.3091	28.1732	28.4142	27.4629	28.5866	28.3471	28.8285	26.7588	27.9201	28.9992	25.2454	28.2651	28.5344	K	2	___1	1	5.06811e-13
P11217;P11217-2	P11217	Glycogen phosphorylase, muscle form	PYGM	______MSRPLSDQEKRKQISVRGLAGVENV	10	25.008	NaN	23.1672	NaN	22.9408	23.0956	23.2673	26.5895	NaN	21.4025	24.5691	20.2491	20.3123	24.0926	K	2	___1	1	6.14467e-06
P11217;P11217-2	P11217	Glycogen phosphorylase, muscle form	PYGM	GVARIHSEILKKTIFKDFYELEPHKFQNKTN	470	23.821	23.3973	NaN	NaN	NaN	NaN	NaN	25.6154	NaN	22.9791	24.0726	NaN	NaN	NaN	K	3	___1	1	0.000175313
P11217;P11217-2	P11217	Glycogen phosphorylase, muscle form	PYGM	HLVGRWIRTQQHYYEKDPKRIYYLSLEFYMG	78	21.9052	NaN	NaN	NaN	NaN	NaN	NaN	22.8047	NaN	NaN	NaN	NaN	NaN	NaN	K	2	___1	1	1.05812e-05
P11217;P11217-2	P11217	Glycogen phosphorylase, muscle form	PYGM	HHDRFKVFADYEDYIKCQEKVSALYKNPREW	783	20.4801	NaN	NaN	NaN	NaN	NaN	NaN	21.3708	NaN	NaN	NaN	NaN	NaN	NaN	K	2	___1	1	0.000308119
P11217;P11217-2	P11217	Glycogen phosphorylase, muscle form	PYGM	YKVHINPNSLFDIQVKRIHEYKRQLLNCLHV	569	23.2774	NaN	NaN	NaN	NaN	NaN	NaN	24.0581	NaN	NaN	NaN	NaN	NaN	NaN	K	3	___1	1	1.36922e-13
P11217;P11217-2	P11217	Glycogen phosphorylase, muscle form	PYGM	LRVIFLENYRVSLAEKVIPAADLSEQISTAG	656	NaN	NaN	NaN	23.818	23.4707	22.9614	22.6615	23.4701	NaN	NaN	24.8427	NaN	23.3757	23.8352	K	3	___1	1	6.96317e-74
P11277-2;P11277;P11277-3	P11277-2	Spectrin beta chain, erythrocytic	SPTB	AIQGDKVKAITAATLKFTEGKGYQPCDPQVI	593	NaN	NaN	22.3348	23.2598	22.2871	21.6835	22.6348	NaN	NaN	21.5774	22.402	NaN	22.4464	22.7152	K	2	___1	1	4.5096e-24
P11277-2;P11277;H0YJE6	P11277-2	Spectrin beta chain, erythrocytic	SPTB	EKSTASWAERFAALEKPTTLELKERQIAERP	2070	NaN	NaN	NaN	NaN	NaN	NaN	NaN	NaN	NaN	NaN	NaN	NaN	23.4209	22.6701	K	2	___1	1	1.04988e-08
P11277-2;P11277;P11277-3;H0YJE6	P11277-2	Spectrin beta chain, erythrocytic	SPTB	DACAGRRTQLVDTADKFRFFSMARDLLSWME	1905	NaN	NaN	21.3461	22.3665	21.9642	22.7706	21.6657	21.9307	21.5959	NaN	21.5244	NaN	22.6949	22.237	K	2	___1	1	0.000245862
P11277-2;P11277;P11277-3	P11277-2	Spectrin beta chain, erythrocytic	SPTB	QLQAFSTYRTVEKPPKFQEKGNLEVLLFTIQ	355	NaN	21.4501	22.0621	21.2631	NaN	21.7353	NaN	NaN	NaN	NaN	NaN	NaN	NaN	NaN	K	3	___1	0.999993	0.00304532
P11532-4;P11532;E9PDN5;A0A075B6G3;A0A087WV90;A0A087WTU7	P11532-4	Dystrophin	DMD	QQVYARKEALKGGLEKTVSLQKDLSEMHEWM	1150	NaN	NaN	NaN	20.3757	NaN	NaN	NaN	NaN	NaN	NaN	NaN	NaN	NaN	NaN	K	2	___1	1	0.000552737
P11532-4;P11532;E9PDN5;A0A075B6G3;A0A087WV90;A0A087WTU7	P11532-4	Dystrophin	DMD	QMNKLRKIQNHIQTLKKWMAEVDVFLKEEWP	1053	NaN	NaN	21.1976	21.9667	20.9777	21.3403	NaN	NaN	NaN	NaN	NaN	NaN	21.3317	21.0632	K	3	___1	1	0.000862385
V9GYG0;P12235	V9GYG0	ADP/ATP translocase 1	SLC25A4	FLKDFLAGGVAAAVSKTAVAPIERVKLLLQV	23	28.379	27.4763	27.6627	28.1246	27.685	28.659	27.0622	28.4384	27.4731	29.0241	27.791	28.6783	29.1952	28.7348	K	3	___1	1	6.67421e-265
V9GYG0;P12235	V9GYG0	ADP/ATP translocase 1	SLC25A4	GAAQREFHGLGDCIIKIFKSDGLRGLYQGFN	163	24.0631	NaN	NaN	NaN	NaN	NaN	NaN	23.984	NaN	NaN	NaN	NaN	NaN	NaN	K	3	___1	1	4.18444e-07
V9GYG0;P12235	V9GYG0	ADP/ATP translocase 1	SLC25A4	QREFHGLGDCIIKIFKSDGLRGLYQGFNVSV	166	22.7847	24.151	23.8713	23.5048	24.0637	25.0805	23.9322	26.2673	NaN	24.6912	23.7994	25.0842	25.6958	23.2095	K	2	___1	1	0.00285397
P12270;P12270-2	P12270	Nucleoprotein TPR	TPR	RSQNTKISTQLDFASKRYEMLQDNVEGYRRE	723	NaN	NaN	NaN	20.3877	20.3083	NaN	NaN	NaN	NaN	NaN	20.3566	20.9742	20.0354	20.72	K	2	___1	1	0.00477496
P12270	P12270	Nucleoprotein TPR	TPR	EGYRREITSLHERNQKLTATTQKQEQIINTM	748	25.1337	NaN	22.2047	23.3343	22.7459	22.327	23.0284	25.7168	21.6457	22.5647	23.1761	22.5667	22.8002	22.1793	K	2	___1	1	0.000107805
P12277;H0YJG0;H0YJK0	P12277	Creatine kinase B-type	CKB	KLPNLGKHEKFSEVLKRLRLQKRGTGGVDTA	313	23.1061	25.8786	NaN	24.6598	25.3024	25.231	NaN	24.9538	24.8082	22.6284	24.3419	26.067	25.355	NaN	K	2	___1	1	0.00680284
P12277;H0YJG0;H0YJK0	P12277	Creatine kinase B-type	CKB	RAGVHIKLPNLGKHEKFSEVLKRLRLQKRGT	307	25.7793	22.2468	NaN	NaN	23.9558	NaN	NaN	25.7537	NaN	NaN	22.1647	NaN	22.4327	22.0012	K	2	___1	1	5.55205e-06
P12277;G3V4N7;G3V2I1	P12277	Creatine kinase B-type	CKB	_____MPFSNSHNALKLRFPAEDEFPDLSAH	11	NaN	NaN	NaN	NaN	NaN	NaN	NaN	NaN	NaN	NaN	20.6193	22.2322	21.7646	NaN	K	3	___1	1	0.00011151
P12882;Q9UKX2;Q9Y623	P12882;Q9UKX2;Q9Y623	Myosin-1;Myosin-2;Myosin-4	MYH1;MYH2;MYH4	ADALADAEERCDQLIKTKIQLEAKIKEVTER;ADSLADAEERCDQLIKTKIQLEAKIKEVTER;AEGLADAEERCDQLIKTKIQLEAKIKEVTER	916	24.7624	NaN	21.9439	21.5093	NaN	20.7882	NaN	23.7591	22.3912	22.6151	23.2251	21.3746	22.355	22.3442	K	2	___1	1	0.00417782
P12882;Q9UKX2;Q9UKX2-2;E7EX84	P12882;Q9UKX2	Myosin-1;Myosin-2	MYH1;MYH2	TLTVKDDQVFPMNPPKYDKIEDMAMMTHLHE;TVTVKDDQVFPMNPPKYDKIEDMAMMTHLHE	84	NaN	NaN	21.1408	NaN	NaN	20.5267	NaN	NaN	22.393	NaN	NaN	NaN	NaN	21.8791	K	2	___1	1	0.00020006
P12882	P12882	Myosin-1	MYH1	VDRKIAEKDEEIDQMKRNHIRIVESMQSTLD	1591	24.2006	NaN	NaN	22.3154	NaN	NaN	19.7871	24.0461	NaN	NaN	NaN	NaN	20.5133	20.1958	K	2	___1	1	0.000879194
P12882;P12883;P13533;Q9UKX2;Q9UKX3;Q9Y623	P12882;P12883;P13533;Q9UKX2;Q9UKX3;Q9Y623	Myosin-1;Myosin-7;Myosin-6;Myosin-2;Myosin-13;Myosin-4	MYH1;MYH7;MYH6;MYH2;MYH13;MYH4	SAQIEMNKKREAEFQKMRRDLEEATLQHEAT;SAQIEMNKKREAEFQKMRRDLEESTLQHEAT;SVQIEMNKKREAEFQKMRRDLEEATLQHEAT	1173	26.5805	24.3564	25.1497	25.7532	24.5063	25.6114	24.7631	26.0199	23.8181	24.5544	25.5799	23.9087	25.4734	25.3659	K	2	___1	1	0.00248656
P12882;Q9Y623	P12882;Q9Y623	Myosin-1;Myosin-4	MYH1;MYH4	ANMKEEFEKTKEELAKTEAKRKELEEKMVTL	869	23.969	NaN	19.6923	20.8446	NaN	NaN	NaN	23.6889	NaN	NaN	NaN	NaN	NaN	NaN	K	2	___1	1	1.87823e-05
P12882;Q9Y623	P12882;Q9Y623	Myosin-1;Myosin-4	MYH1;MYH4	EELAKTEAKRKELEEKMVTLMQEKNDLQLQV	880	NaN	NaN	21.8081	22.4681	21.4985	22.5528	23.4878	19.2908	NaN	NaN	21.4294	NaN	21.0985	23.7696	K	2	___1	1	9.21661e-08
P12882;Q9UKX2	P12882;Q9UKX2	Myosin-1;Myosin-2	MYH1;MYH2	EARVRELEGEVESEQKRNAEAVKGLRKHERR;EARVRELEGEVESEQKRNVEAVKGLRKHERK	1837	27.2282	28.3471	28.962	28.9738	27.9484	29.6401	28.3472	28.4876	27.0268	27.8701	27.8377	26.4036	27.3203	28.1603	K	3	___1	1	8.86257e-75
P12882;P12883;P13533;Q9UKX2;Q9UKX3;Q9Y623	P12882;P12883;P13533;Q9UKX2;Q9UKX3;Q9Y623	Myosin-1;Myosin-7;Myosin-6;Myosin-2;Myosin-13;Myosin-4	MYH1;MYH7;MYH6;MYH2;MYH13;MYH4	SSFQTVSALFRENLNKLMTNLRSTHPHFVRC;SSFQTVSALHRENLNKLMTNLRSTHPHFVRC;SSFQTVSALHRENLNKLMTNLRTTHPHFVRC;SSFQTVSAVFRENLNKLMTNLRSTHPHFVRC	657	25.3951	NaN	24.3008	25.682	25.853	26.1969	24.9151	24.9282	24.5179	23.9924	24.863	23.6946	25.5884	26.0263	K	2	___1	1	8.53109e-08
P12882;Q9UKX3;Q9Y623	P12882;Q9UKX3;Q9Y623	Myosin-1;Myosin-13;Myosin-4	MYH1;MYH13;MYH4	DCDLLREQYEEEQEAKAELQRALSKANSEVA;DCDLLREQYEEEQEAKAELQRAMSKANSEVA;DCDLLREQYEEEQEAKAELQRGMSKANSEVA	1358	22.4993	NaN	NaN	NaN	NaN	NaN	NaN	22.4423	NaN	NaN	NaN	NaN	NaN	NaN	K	3	___1	1	1.82952e-08
P12882	P12882	Myosin-1	MYH1	AKTSVFVVDPKESFVKATVQSREGGKVTAKT	49	NaN	NaN	22.2492	22.7858	NaN	22.5551	22.7003	21.6746	20.3916	NaN	23.0628	NaN	22.5503	23.3985	K	2	___1	1	2.67827e-05
P12882;Q9UKX2	P12882;Q9UKX2	Myosin-1;Myosin-2	MYH1;MYH2	ASNMETVSKAKGNLEKMCRALEDQLSEIKTK;ASNVETVSKAKGNLEKMCRTLEDQLSELKSK	1253	24.2855	21.1621	20.9311	22.0096	NaN	19.9195	NaN	25.2844	NaN	20.5618	22.2624	21.6689	22.341	22.721	K	2	___1	1	0.00396595
P12882	P12882	Myosin-1	MYH1	ELNQVKSEVDRKIAEKDEEIDQMKRNHIRIV	1583	24.251	NaN	23.0976	24.1089	21.7369	23.573	24.1413	23.4866	NaN	NaN	23.0763	NaN	23.2758	23.6093	K	2	___1	1	2.25295e-12
P12882	P12882	Myosin-1	MYH1	QSKIEDEQALGMQLQKKIKELQARIEELEEE	1110	23.4345	NaN	21.9508	23.5517	NaN	23.3024	23.7573	24.1933	NaN	NaN	23.5648	NaN	23.0857	24.1349	K	2	___1	1	3.83498e-30
P12882;Q9UKX2	P12882;Q9UKX2	Myosin-1;Myosin-2	MYH1;MYH2	TEQIAEGGKRIHELEKIKKQVEQEKCELQAA;TEQIAEGGKRIHELEKIKKQVEQEKSELQAA	1534	29.7606	25.8124	27.8192	27.8247	26.6363	27.6013	27.3732	29.6585	27.318	27.1653	28.0043	25.9705	26.7208	27.6007	K	2	___1	1	4.94093e-05
P12882;Q9UKX2	P12882;Q9UKX2	Myosin-1;Myosin-2	MYH1;MYH2	LEQQVDDLEGSLEQEKKIRMDLERAKRKLEG;LEQQVDDLEGSLEQEKKLRMDLERAKRKLEG	1048	26.5905	23.4961	23.4704	24.3102	24.9354	25.0256	24.4492	25.7416	23.0572	24.2171	24.1512	23.1101	24.0073	23.6281	K	3	___1	1	8.82954e-83
P12882;Q9UKX2;Q9UKX3;Q9Y623	P12882;Q9UKX2;Q9UKX3;Q9Y623	Myosin-1;Myosin-2;Myosin-13;Myosin-4	MYH1;MYH2;MYH13;MYH4	ICRKGFPSRILYADFKQRYKVLNASAIPEGQ;ICRKGFPSRILYADFKQRYRILNASAIPEGQ	725	26.741	NaN	25.0324	25.7519	25.0748	26.0083	25.0229	26.2724	24.8183	23.6306	25.514	20.3722	25.355	26.5051	K	2	___1	1	0.000362208
P12882;Q9UKX2;Q9Y623	P12882;Q9UKX2;Q9Y623	Myosin-1;Myosin-2;Myosin-4	MYH1;MYH2;MYH4	ERCDQLIKTKIQLEAKIKEVTERAEDEEEIN	924	24.9215	NaN	24.7206	26.4444	25.9273	25.4062	23.4931	27.0006	26.4103	24.336	26.4777	NaN	22.8227	24.3508	K	2	___1	1	0.00201146
P12882;Q9UKX2	P12882;Q9UKX2	Myosin-1;Myosin-2	MYH1;MYH2	EEGKILRIQLELNQVKSEVDRKIAEKDEEID	1575	NaN	22.5254	23.8353	23.2792	NaN	NaN	NaN	23.0701	24.199	23.6876	24.4509	NaN	NaN	23.638	K	3	___1	1	7.16932e-37
P12882;Q9UKX2;Q9Y623	P12882;Q9UKX2;Q9Y623	Myosin-1;Myosin-2;Myosin-4	MYH1;MYH2;MYH4	LEEAGGATSAQIEMNKKREAEFQKMRRDLEE	1171	NaN	21.9355	23.5485	24.1566	21.9914	23.9515	21.8975	NaN	22.7424	20.6313	21.995	21.6079	21.8815	23.9055	K	2	___1	1	6.98839e-57
P12882;Q9UKX2;Q9UKX3	P12882;Q9UKX2;Q9UKX3	Myosin-1;Myosin-2;Myosin-13	MYH1;MYH2;MYH13	EEDHKNILRLQDLVDKLQAKVKSYKRQAEEA;EEDRKNILRLQDLVDKLQAKVKSYKRQAEEA	1876	26.4652	19.9281	26.0701	NaN	NaN	NaN	NaN	26.7496	25.7412	NaN	NaN	NaN	25.4068	27.2702	K	2	___1	1	2.00699e-07
P12882	P12882	Myosin-1	MYH1	KMEIDDLASNMETVSKAKGNLEKMCRALEDQ	1244	22.1405	NaN	22.359	23.4099	22.7698	23.9273	23.4381	22.5134	NaN	21.4061	23.5348	21.5215	23.7318	24.3149	K	2	___1	1	3.2325e-28
P12882;Q9UKX2	P12882;Q9UKX2	Myosin-1;Myosin-2	MYH1;MYH2	IKNAYEESLDQLETLKRENKNLQQEISDLTE	1505	19.9519	NaN	NaN	NaN	NaN	NaN	NaN	24.4541	NaN	23.938	23.4576	NaN	NaN	NaN	K	2	___1	1	5.5699e-52
P12882;Q9UKX2	P12882;Q9UKX2	Myosin-1;Myosin-2	MYH1;MYH2	QQEISDLTEQIAEGGKRIHELEKIKKQVEQE	1527	21.9041	NaN	NaN	NaN	NaN	NaN	NaN	NaN	NaN	NaN	23.541	21.5762	NaN	NaN	K	3	___1	1	4.1269e-41
P12882;Q9UKX2;Q9Y623	P12882;Q9UKX2;Q9Y623	Myosin-1;Myosin-2;Myosin-4	MYH1;MYH2;MYH4	KNLTEEMAGLDETIAKLTKEKKALQEAHQQT	997	22.9852	NaN	23.462	24.2613	23.2058	21.8455	NaN	24.4419	NaN	24.5595	24.7042	23.0944	NaN	23.6023	K	3	___1	1	1.8479e-94
P12882;Q9UKX2;Q9Y623	P12882;Q9UKX2;Q9Y623	Myosin-1;Myosin-2;Myosin-4	MYH1;MYH2;MYH4	LSRGKQAFTQQIEELKRQLEEEIKAKNALAH;LSRGKQAFTQQIEELKRQLEEEIKAKSALAH;LSRGKQAFTQQIEELKRQLEEETKAKSTLAH	1322	24.2142	23.9884	24.4271	24.6454	23.6163	24.1056	21.8444	24.6476	24.9507	25.1166	25.0572	23.2514	23.8598	24.5367	K	2	___1	1	8.11855e-184
P12882	P12882	Myosin-1	MYH1	RLQTESGEYSRQLDEKDTLVSQLSRGKQAFT	1298	22.385	NaN	NaN	23.4509	NaN	NaN	NaN	21.4824	NaN	NaN	NaN	NaN	NaN	NaN	K	2	___1	1	5.52288e-05
P12882;Q9UKX2	P12882;Q9UKX2	Myosin-1;Myosin-2	MYH1;MYH2	TQQIEELKRQLEEEIKAKNALAHALQSSRHD;TQQIEELKRQLEEEIKAKSALAHALQSSRHD	1330	24.883	21.7858	22.0643	23.5557	NaN	23.5179	23.5927	24.4886	23.2819	22.7025	24.1355	21.8473	23.1056	23.9808	K	2	___1	1	0.000358572
P12882;Q9UKX2	P12882;Q9UKX2	Myosin-1;Myosin-2	MYH1;MYH2	MIDVERTNAACAALDKKQRNFDKILAEWKQK;MLDVERTNAACAALDKKQRNFDKILAEWKQK	1450	27.5943	24.6176	25.8105	26.6192	24.2302	26.3119	NaN	27.5382	27.058	26.2437	27.8801	26.5185	26.757	27.1837	K	2	___1	1	1.12787e-07
P12882;Q9UKX2;Q9Y623	P12882;Q9UKX2;Q9Y623	Myosin-1;Myosin-2;Myosin-4	MYH1;MYH2;MYH4	LDDLQAEEDKVNTLTKAKIKLEQQVDDLEGS;LDDLQMEEDKVNTLTKAKTKLEQQVDDLEGS	NaN	25.1561	22.9767	22.3959	24.2331	21.601	23.4586	NaN	23.5397	23.7392	22.7228	23.1742	24.4777	23.9109	24.3304	K	2	___1	1	0.00377289
P12882;Q9UKX2;Q9Y623	P12882;Q9UKX2;Q9Y623	Myosin-1;Myosin-2;Myosin-4	MYH1;MYH2;MYH4	RVQLLHTQNTSLINTKKKLETDISQIQGEME;RVQLLHTQNTSLINTKKKLETDISQMQGEME	1733	28.1692	25.8288	22.6224	27.4234	27.1985	27.3484	23.8559	28.2612	25.8751	27.7599	27.1426	26.1047	26.9133	28.0087	K	3	___1	1	1.3757e-182
P12883;P13533	P12883;P13533	Myosin-7;Myosin-6	MYH7;MYH6	DEAEERADIAESQVNKLRAKSRDIGAKQKMH;DEAEERADIAESQVNKLRAKSRDIGTKGLNE	1919	27.644	28.9735	28.8642	28.3314	28.6569	28.744	28.6327	27.7622	27.5751	28.5012	27.8586	27.7263	28.61	29.0541	K	4	___1	1	8.94064e-74
P12883	P12883	Myosin-7	MYH7	EETQRSVNDLTSQRAKLQTENGELSRQLDEK	1279	24.0254	23.2168	23.2597	25.2395	24.3966	23.54	24.4409	24.7302	23.4663	23.1137	22.6223	24.6117	25.0975	24.9215	K	2	___1	1	1.696e-17
P12883	P12883	Myosin-7	MYH7	EAHQQALDDLQAEEDKVNTLTKAKVKLEQQV	1016	NaN	NaN	NaN	NaN	NaN	NaN	NaN	20.8371	NaN	NaN	NaN	NaN	NaN	NaN	K	3	___1	1	1.62009e-29
P12883	P12883	Myosin-7	MYH7	LDDLQAEEDKVNTLTKAKVKLEQQVDDLEGS	1022	25.1561	22.9767	22.3959	24.2331	21.601	23.4586	NaN	23.5397	23.7392	22.7228	23.1742	24.4777	23.9109	24.3304	K	2	___1	1	0.00377289
P12883;P13533	P12883;P13533	Myosin-7;Myosin-6	MYH7;MYH6	TQIQLDDAVRANDDLKENIAIVERRNNLLQA	1668	NaN	NaN	NaN	NaN	21.7047	NaN	20.311	NaN	20.6991	NaN	NaN	NaN	NaN	20.4514	K	2	___1	1	1.67146e-11
P12883	P12883	Myosin-7	MYH7	TSNMEQIIKAKANLEKMCRTLEDQMNEHRSK	1247	25.607	22.7561	20.9381	22.7339	NaN	20.0846	NaN	24.6263	21.1484	21.5085	23.1089	23.0181	23.7638	23.8272	K	2	___1	1	0.00503657
P12883;P13533	P12883;P13533	Myosin-7;Myosin-6	MYH7;MYH6	EEGKILRAQLEFNQIKAEIERKLAEKDEEME	1569	23.7844	25.0509	24.6012	25.878	25.5493	24.3369	NaN	24.7938	25.186	24.9849	25.8876	25.8408	25.3529	24.3564	K	2	___1	1	8.03993e-45
P12883;P13533	P12883;P13533	Myosin-7;Myosin-6	MYH7;MYH6	QDNLADAEERCDQLIKNKIQLEAKVKEMNER;QDNLNDAEERCDQLIKNKIQLEAKVKEMNER	910	22.9558	NaN	NaN	NaN	NaN	NaN	NaN	21.5678	22.5606	NaN	NaN	NaN	21.7407	NaN	K	2	___1	1	0.00330126
P12883;P13533	P12883;P13533	Myosin-7;Myosin-6	MYH7;MYH6	IERKLAEKDEEMEQAKRNHLRVVDSLQTSLD;IERKLAEKDEEMEQAKRNHQRVVDSLQTSLD	1587	NaN	21.3722	21.8611	22.2841	22.2094	NaN	21.5481	22.1152	NaN	NaN	NaN	20.5381	NaN	21.576	K	3	___1	1	3.90049e-05
P12883	P12883	Myosin-7	MYH7	TRPFDLKKDVFVPDDKQEFVKAKIVSREGGK	43	26.9331	26.3257	26.3475	27.3498	26.9225	27.8227	26.8868	26.1688	26.8355	26.2473	27.1281	26.5468	27.3502	27.4842	K	2	___1	1	2.22239e-05
P12883	P12883	Myosin-7	MYH7	LKKDVFVPDDKQEFVKAKIVSREGGKVTAET	48	22.2895	NaN	NaN	NaN	NaN	NaN	NaN	21.8474	NaN	NaN	NaN	NaN	NaN	NaN	K	3	___1	0.999987	7.08819e-05
P12883	P12883	Myosin-7	MYH7	ASMKEEFTRLKEALEKSEARRKELEEKMVSL	865	27.8812	23.732	23.9549	24.6868	24.4664	25.539	25.0986	27.1363	23.9747	23.7061	24.3566	24.7008	24.6963	25.1486	K	2	___1	1	0.000736304
P12883	P12883	Myosin-7	MYH7	TVTVKEDQVMQQNPPKFDKIEDMAMLTFLHE	83	26.2399	24.4532	23.6644	23.4738	24.314	24.6924	23.7713	25.8629	24.7738	22.9966	23.7346	24.6956	24.4192	23.3744	K	2	___1	1	3.51367e-68
P12883;P13533;Q9UKX3	P12883;P13533;Q9UKX3	Myosin-7;Myosin-6;Myosin-13	MYH7;MYH6;MYH13	EALEKSEARRKELEEKMVSLLQEKNDLQLQV;EELARSEARRKELEEKMVSLLQEKNDLQLQV;ETLEKSEARRKELEEKMVSLLQEKNDLQLQV	876	25.4065	22.8943	24.8278	25.6789	26.316	26.6705	26.5675	26.0857	25.0463	26.0509	25.7328	25.0538	25.9829	26.8727	K	2	___1	1	1.36258e-166
P12883	P12883	Myosin-7	MYH7	EARVRELENELEAEQKRNAESVKGMRKSERR	1831	26.6429	24.5563	23.7642	24.643	24.9085	25.3018	24.3913	26.2584	23.4338	24.4102	24.1857	24.8738	24.855	23.943	K	3	___1	1	9.36155e-105
P12883	P12883	Myosin-7	MYH7	PLLKSAEREKEMASMKEEFTRLKEALEKSEA	853	NaN	22.1229	21.3478	22.8123	21.8243	23.6684	22.042	NaN	22.6116	20.0423	22.4083	22.5064	22.8449	22.9576	K	2	___1	1	0.000154563
P12883;P13533	P12883;P13533	Myosin-7;Myosin-6	MYH7;MYH6	DCDLLREQYEEETEAKAELQRVLSKANSEVA	1354	NaN	21.0717	NaN	21.0329	NaN	21.2589	NaN	23.8761	NaN	NaN	20.3515	20.9065	NaN	20.7668	K	2	___1	1	2.38036e-74
P12883	P12883	Myosin-7	MYH7	AIPEGQFIDSRKGAEKLLSSLDIDHNQYKFG	744	21.3131	23.8303	NaN	NaN	NaN	NaN	NaN	25.9414	NaN	NaN	NaN	NaN	NaN	NaN	K	3	___1	1	5.33546e-09
P12883	P12883	Myosin-7	MYH7	AEKLLSSLDIDHNQYKFGHTKVFFKAGLLGL	757	26.4004	NaN	NaN	NaN	NaN	NaN	NaN	25.8939	NaN	NaN	NaN	NaN	NaN	NaN	K	3	___1	1	2.43949e-52
P12883	P12883	Myosin-7	MYH7	QLDEKEALISQLTRGKLTYTQQLEDLKRQLE	1305	28.411	25.4533	26.3357	27.5704	27.8263	28.5938	25.3225	27.8397	27.812	27.2138	26.6301	27.3677	26.8873	27.3293	K	3	___1	1	1.8915e-66
P12883	P12883	Myosin-7	MYH7	LTRGKLTYTQQLEDLKRQLEEEVKAKNALAH	1316	26.5172	25.3946	22.0007	26.5989	28.5132	27.3772	26.4769	26.9875	27.2015	27.6869	27.0517	26.3778	26.6421	26.9731	K	2	___1	1	5.41973e-121
P12883	P12883	Myosin-7	MYH7	NARIEDEQALGSQLQKKLKELQARIEELEEE	1106	26.0957	25.8352	24.1077	25.1735	25.2339	25.6191	25.1823	25.9527	24.4171	24.4326	23.8074	25.5086	25.2844	25.4063	K	2	___1	1	4.49892e-268
P12883	P12883	Myosin-7	MYH7	NWPWMKLYFKIKPLLKSAEREKEMASMKEEF	841	NaN	NaN	21.6976	22.6284	NaN	21.7574	NaN	NaN	23.6865	NaN	20.9219	22.7589	22.7434	23.3598	K	2	___1	1	0.0040825
P12883;P13533	P12883;P13533	Myosin-7;Myosin-6	MYH7;MYH6	MFNWMVTRINATLETKQPRQYFIGVLDIAGF	450	22.57	23.9628	22.3723	23.6903	22.4215	23.8593	23.3224	21.8136	24.0385	21.6462	22.7036	23.0614	24.1531	23.9077	K	2	___1	1	1.08979e-13
P12883;P13533	P12883;P13533	Myosin-7;Myosin-6	MYH7;MYH6	ERCDQLIKNKIQLEAKVKEMNERLEDEEEMN	918	27.5794	NaN	NaN	26.7563	26.9707	26.5292	27.2897	26.4709	27.0268	25.1017	26.3208	24.8838	27.4345	27.1483	K	2	___1	1	0.00358811
P12883;P13533	P12883;P13533	Myosin-7;Myosin-6	MYH7;MYH6	EFNQIKAEIERKLAEKDEEMEQAKRNHLRVV;EFNQIKAEIERKLAEKDEEMEQAKRNHQRVV	1579	26.5677	24.3423	24.1264	24.5015	23.7928	24.7857	24.1398	26.7759	NaN	23.4377	24.1374	24.1081	25.0277	24.2478	K	2	___1	1	5.99754e-18
P12883	P12883	Myosin-7	MYH7	EDEEEMNAELTAKKRKLEDECSELKRDIDDL	942	23.895	NaN	NaN	NaN	NaN	NaN	NaN	21.4047	NaN	NaN	NaN	NaN	NaN	NaN	K	3	___1	1	0.00600916
P12883	P12883	Myosin-7	MYH7	LTAKKRKLEDECSELKRDIDDLELTLAKVEK	951	26.28	23.5648	22.5018	23.5154	22.4695	24.0984	22.4727	26.1312	24.4586	24.3215	24.6609	24.4133	24.4887	24.9728	K	2	___1	1	1.90284e-24
P12883	P12883	Myosin-7	MYH7	SEKERLEAQTRPFDLKKDVFVPDDKQEFVKA	34	29.8534	28.7602	28.5344	28.2231	29.9717	29.4613	27.4074	29.9618	29.0098	29.6943	28.5488	29.3789	29.4802	29.6333	K	3	___1	1	2.45751e-13
P12883;P13533	P12883;P13533	Myosin-7;Myosin-6	MYH7;MYH6	ERLEDEEEMNAELTAKKRKLEDECSELKKDI;ERLEDEEEMNAELTAKKRKLEDECSELKRDI	939	25.9488	24.3744	22.5801	24.1954	24.2196	25.0074	24.2491	24.0154	23.7884	21.8498	23.0585	24.0552	24.5639	24.5557	K	3	___1	1	1.67633e-88
P12883;P13533	P12883;P13533	Myosin-7;Myosin-6	MYH7;MYH6	LEEAGGATSVQIEMNKKREAEFQKMRRDLEE	1165	NaN	NaN	NaN	21.1368	21.1771	21.7504	20.6825	NaN	20.8234	NaN	NaN	21.3235	20.9326	21.7678	K	2	___1	1	1.78634e-27
P12883;P13533	P12883;P13533	Myosin-7;Myosin-6	MYH7;MYH6	KLELDDVTSNMEQIIKAKANLEKMCRTLEDQ;KLELDDVTSNMEQIIKAKANLEKVSRTLEDQ	1240	21.4736	21.8348	22.9665	24.4106	24.0713	25.4148	24.6589	23.0723	23.8403	25.4641	24.8802	22.7126	25.3266	25.2313	K	2	___1	1	3.71196e-72
P12883;P13533	P12883;P13533	Myosin-7;Myosin-6	MYH7;MYH6	LEQQVDDLEGSLEQEKKVRMDLERAKRKLEG	1042	26.5905	23.4961	23.4704	24.3102	24.9354	25.0256	24.4492	25.7416	23.0572	24.2171	24.1512	23.1101	24.0073	23.6281	K	3	___1	1	8.82954e-83
P12883	P12883	Myosin-7	MYH7	STLFANYAGADAPIEKGKGKAKKGSSFQTVS	633	23.3259	NaN	NaN	NaN	NaN	NaN	NaN	22.5551	NaN	NaN	NaN	NaN	NaN	NaN	K	3	___1	1	3.08849e-17
P12883;P13533	P12883;P13533	Myosin-7;Myosin-6	MYH7;MYH6	EEDKKNLLRLQDLVDKLQLKVKAYKRQAEEA;EEDRKNLLRLQDLVDKLQLKVKAYKRQAEEA	1870	25.7648	28.6412	27.9138	28.4375	27.7967	27.5078	25.1321	26.7061	26.5286	27.5337	27.5609	28.7411	28.5392	28.5868	K	2	___1	1	1.53515e-34
P12883;Q9Y2K3	P12883	Myosin-7;Myosin-15	MYH7;MYH15	SMYKLTGAIMHFGNMKFKLKQREEQAEPDGT	363	23.938	NaN	NaN	22.5929	22.0387	23.4857	21.6646	NaN	NaN	NaN	21.0985	21.5303	23.6923	22.9529	K	3	___1	1	0.000740256
P12883	P12883	Myosin-7	MYH7	DLKLTQESIMDLENDKQQLDERLKKKDFELN	1073	23.332	NaN	NaN	NaN	NaN	NaN	NaN	22.9235	NaN	NaN	22.5736	23.2414	NaN	22.6954	K	3	___1	1	2.65469e-34
P12883;P13533	P12883;P13533	Myosin-7;Myosin-6	MYH7;MYH6	EIQLSHANRMAAEAQKQVKSLQSLLKDTQIQ	1641	21.5864	NaN	NaN	20.5844	NaN	NaN	NaN	22.3249	NaN	NaN	NaN	21.9217	21.537	20.7002	K	2	___1	1	0.00200752
P12883;P13533	P12883;P13533	Myosin-7;Myosin-6	MYH7;MYH6	LKNAYEESLEHLETFKRENKNLQEEISDLTE	1499	27.1012	NaN	NaN	NaN	NaN	NaN	NaN	26.2223	NaN	NaN	22.1677	21.6151	NaN	21.3807	K	3	___1	1	5.86113e-44
P12883;P13533	P12883;P13533	Myosin-7;Myosin-6	MYH7;MYH6	SAHLERMKKNMEQTIKDLQHRLDEAEQIALK	1791	NaN	21.5824	19.9142	23.0299	22.2039	21.6372	NaN	NaN	23.7935	NaN	21.0957	22.8852	22.881	22.1866	K	3	___1	1	0.00014534
P12883;P13533	P12883;P13533	Myosin-7;Myosin-6	MYH7;MYH6	RQAEEAEEQANTNLSKFRKVQHELDEAEERA	1895	24.6244	NaN	NaN	22.8222	23.3842	22.7142	21.7097	25.1316	22.6	NaN	23.156	22.9798	23.5664	23.3526	K	3	___1	1	2.66622e-153
P12883;P13533	P12883;P13533	Myosin-7;Myosin-6	MYH7;MYH6	KKQRNFDKILAEWKQKYEESQSELESSQKEA	1459	NaN	NaN	NaN	NaN	NaN	NaN	NaN	NaN	NaN	NaN	NaN	19.9819	19.7199	19.2365	K	2	___1	1	0.000160004
P12883	P12883	Myosin-7	MYH7	KLQTENGELSRQLDEKEALISQLTRGKLTYT	1294	24.956	NaN	24.2696	24.014	NaN	24.5954	24.1455	25.4485	NaN	22.4384	25.7382	22.3708	25.2071	24.9933	K	2	___1	1	4.05841e-192
P12883	P12883	Myosin-7	MYH7	TQQLEDLKRQLEEEVKAKNALAHALQSARHD	1324	24.8287	23.3031	22.6691	24.0514	23.1206	24.1764	23.6757	24.9294	23.198	22.7306	24.3382	23.1734	24.1485	24.0544	K	2	___1	1	4.94373e-05
P12883	P12883	Myosin-7	MYH7	AKLFDNHLGKSANFQKPRNIKGKPEAHFSLI	565	26.3531	26.6846	24.8823	25.7517	24.9088	26.063	25.0737	25.6951	25.6901	24.6888	25.3828	25.3288	25.8418	25.2708	K	2	___1	1	0.00410704
P12883;P13533	P12883;P13533	Myosin-7;Myosin-6	MYH7;MYH6	MVDVERSNAAAAALDKKQRNFDKILAEWKQK	1444	28.2914	28.0409	27.3545	28.913	28.4	28.7094	24.8129	28.5794	27.9726	27.4758	26.8119	27.7391	28.4755	28.7361	K	2	___1	1	2.4437e-19
P12883	P12883	Myosin-7	MYH7	TEQLGSSGKTIHELEKVRKQLEAEKMELQSA	1528	29.6905	27.7352	27.7752	28.5355	28.5784	28.6962	28.5285	29.4834	27.8976	27.6554	28.3441	26.6818	28.6267	28.4219	K	3	___1	1	9.15096e-23
P12883;P13533	P12883;P13533	Myosin-7;Myosin-6	MYH7;MYH6	IETYLLEKSRVIFQLKAERDYHIFYQILSNK;IETYLLEKSRVIFQLKAERNYHIFYQILSNK	278	23.8977	22.0654	23.2795	22.5916	23.0785	25.0589	24.4957	24.154	23.9174	24.3529	24.1479	24.3496	24.9112	24.3367	K	2	___1	1	0.000363379
P12883;P13533	P12883;P13533	Myosin-7;Myosin-6	MYH7;MYH6	RVQLLHSQNTSLINQKKKMDADLSQLQTEVE;RVQLLHSQNTSLINQKKKMESDLTQLQSEVE	1727	27.6024	22.7316	25.6095	27.9804	28.4246	27.8525	25.9853	27.8698	24.5	27.0149	27.9012	24.9833	28.2049	27.8893	K	3	___1	1	8.04792e-255
P12883	P12883	Myosin-7	MYH7	VSREGGKVTAETEYGKTVTVKEDQVMQQNPP	67	NaN	NaN	NaN	NaN	NaN	21.7432	NaN	NaN	NaN	NaN	20.5901	22.7839	21.5684	22.6313	K	2	___1	1	1.04234e-20
P12956;B1AHC9;P12956-2	P12956	X-ray repair cross-complementing protein 6	XRCC6	MPFTEKIMATPEQVGKMKAIVEKLRFTYRSD	461	NaN	21.7785	NaN	22.8669	22.125	22.7344	21.1797	NaN	NaN	NaN	22.4778	21.6277	22.5203	22.0791	K	2	___1	1	0.00127771
P13051-2;P13051	P13051-2	Uracil-DNA glycosylase	UNG	FFGCRHFSKTNELLQKSGKKPIDWKEL____	293	NaN	19.8256	20.8614	NaN	NaN	20.7289	NaN	NaN	NaN	22.057	NaN	NaN	NaN	NaN	K	2	___1	1	0.00308467
P13073;H3BN72;H3BNV9;Q86WV2;H3BPG0	P13073	Cytochrome c oxidase subunit 4 isoform 1, mitochondrial	COX4I1	PLPEVAHVKHLSASQKALKEKEKASWSSLSM	60	29.1234	27.2385	27.794	27.8416	28.4957	28.0351	27.6593	30.05	27.943	29.5666	28.747	28.3409	29.3967	29.2681	K	3	___1	1	7.5782e-17
P13073	P13073	Cytochrome c oxidase subunit 4 isoform 1, mitochondrial	COX4I1	DKEWVAKQTKRMLDMKVNPIQGLASKWDYEK	149	NaN	NaN	NaN	NaN	NaN	NaN	NaN	NaN	NaN	NaN	NaN	NaN	NaN	21.5388	K	2	___1	1	4.35654e-06
P13533	P13533	Myosin-6	MYH6	TEKLLSSLDIDHNQYKFGHTKVFFKAGLLGL	759	26.4004	NaN	NaN	NaN	NaN	NaN	NaN	25.8939	NaN	NaN	NaN	NaN	NaN	NaN	K	3	___1	1	2.43949e-52
P13639	P13639	Elongation factor 2	EEF2	ILDPIFKVFDAIMNFKKEETAKLIEKLDIKL	308	20.0467	22.3529	21.9492	22.9899	24.343	23.7912	23.888	22.8716	NaN	NaN	21.9573	24.1179	21.2272	21.9496	K	2	___1	1	0.000353582
P13639	P13639	Elongation factor 2	EEF2	GTITTFEHAHNMRVMKFSVSPVVRVAVEAKN	498	NaN	NaN	20.0018	22.8857	23.3003	22.4791	22.0821	23.5558	NaN	21.7611	22.6426	NaN	22.2959	22.7503	K	2	___1	1	0.0013103
P13804;P13804-2;H0YLU7;H0YK49;H0YL12;H0YKF0;H0YNX6	P13804	Electron transfer flavoprotein subunit alpha, mitochondrial	ETFA	AAKLEVAPISDIIAIKSPDTFVRTIYAGNAL	139	24.2121	25.4982	NaN	24.5625	22.8492	25.0647	NaN	22.9011	NaN	27.544	27.2828	25.664	26.6209	26.0088	K	3	___1	1	5.22658e-58
P13804;H0YLU7;H0YKF0;J3KN60	P13804	Electron transfer flavoprotein subunit alpha, mitochondrial	ETFA	ATRLGGEVSCLVAGTKCDKVAQDLCKVAGIA	59	NaN	NaN	NaN	NaN	NaN	NaN	NaN	NaN	NaN	19.5463	NaN	21.6775	21.0692	20.9696	K	2	___1	1	7.00834e-06
P13804;P13804-2;H0YLU7;H0YK49;H0YL12;H0YKF0;H0YNX6	P13804	Electron transfer flavoprotein subunit alpha, mitochondrial	ETFA	GASAFGKNLLPRVAAKLEVAPISDIIAIKSP	126	23.3331	NaN	NaN	21.5577	NaN	22.0843	NaN	23.6816	22.878	26.8377	22.8061	23.8024	24.4432	21.9439	K	2	___1	1	1.17106e-11
P13804;P13804-2;H0YLU7;H0YL12;H0YKF0	P13804	Electron transfer flavoprotein subunit alpha, mitochondrial	ETFA	CDKVAQDLCKVAGIAKVLVAQHDVYKGLLPE	75	20.7832	NaN	NaN	NaN	NaN	NaN	NaN	22.8355	NaN	21.2739	21.2533	23.5608	20.8939	NaN	K	3	___1	1	4.51088e-29
P13805-2;P13805-3;P13805;K7EQL4;Q3B759;K7EKM3;K7ELB0;M0QY38	P13805-2	Troponin T, slow skeletal muscle	TNNT1	DWIHQLESEKFDLMAKLKQQKYEINVLYNRI	216	25.0271	NaN	24.335	26.3742	27.1638	27.2234	26.8198	25.9368	20.5844	24.9028	25.3041	22.9518	25.6141	26.1121	K	2	___1	1	0.00503657
P13805-2;P13805-3;P13805;K7EQL4;Q3B759;K7EKM3;K7ELB0	P13805-2	Troponin T, slow skeletal muscle	TNNT1	KYEINVLYNRISHAQKFRKGAGKGRVGGRWK	236	26.7285	NaN	24.938	24.5001	26.1107	26.0885	24.0037	27.5246	24.5849	26.1239	26.2552	25.9809	26.8461	25.5258	K	3	___1	1	0.00079456
P13805-2;P13805-3;P13805;K7EQL4;Q3B759;M0QZU8;M0QZY5;M0QX01;K7EKM3;K7ELB0	P13805-2	Troponin T, slow skeletal muscle	TNNT1	EQQRFRTEKERERQAKLAEEKMRKEEEEAKK	116	24.3137	21.8219	21.1336	22.4595	21.6635	21.2779	NaN	24.179	20.76	NaN	21.681	20.7781	22.4773	22.113	K	2	___1	1	0.00404506
P13805-2;P13805-3;P13805;K7EQL4;Q3B759;K7EKM3;K7ELB0;M0QY38	P13805-2	Troponin T, slow skeletal muscle	TNNT1	LESEKFDLMAKLKQQKYEINVLYNRISHAQK	221	23.6555	NaN	21.0251	22.2174	23.037	21.8807	NaN	23.0365	22.0247	22.8478	22.262	22.1634	22.7525	22.1167	K	2	___1	1	1.57616e-17
P13805-2;P13805-3;P13805;K7EQL4;Q3B759;M0QZU8;K7EKM3;K7ELB0	P13805-2	Troponin T, slow skeletal muscle	TNNT1	KVLSNMGAHFGGYLVKAEQKRGKRQTGREMK	156	21.7638	NaN	NaN	NaN	NaN	NaN	NaN	23.5812	NaN	NaN	21.1999	21.4831	NaN	NaN	K	3	___1	1	3.49325e-12
P13807-2;P13807	P13807-2	Glycogen [starch] synthase, muscle	GYS1	VRTQVELLEAPTPALKRTLDSMNSKGCKFLA	88	21.034	22.1164	NaN	23.5685	NaN	NaN	NaN	22.2761	NaN	22.9297	NaN	NaN	NaN	23.873	K	2	___1	1	1.84624e-07
P13929;P13929-2;E5RGZ4;P13929-3;K7EKN2;K7EPM1;E5RI09;E5RG95	P13929	Beta-enolase;Enolase	ENO3	ILGVSLAVCKAGAAEKGVPLYRHIADLAGNP	126	29.2225	23.2942	28.7256	29.9023	28.6885	29.2756	28.9148	29.4869	28.4591	28.5171	29.6268	25.5622	29.0493	30.1195	K	2	___1	1	9.46141e-13
P13929;P13929-2;E5RGZ4;P13929-3;K7EKN2;K7EPM1;E5RI09;E5RG95;K7EP84;E5RJH5	P13929	Beta-enolase;Enolase	ENO3	___________MAMQKIFAREILDSRGNPTV	5	27.3833	28.5808	28.2928	28.9819	27.9493	28.3955	27.1706	27.9699	26.6682	27.5822	28.4733	27.717	28.2482	28.4986	K	2	___1	1	0.00211626
P13929;P13929-2;E5RGZ4;K7EKN2;K7EPM1;E5RI09;E5RG95	P13929	Beta-enolase;Enolase	ENO3	AVENINNTLGPALLQKKLSVVDQEKVDKFMI	80	27.5039	25.392	30.7075	26.3035	NaN	31.099	30.2507	26.794	27.132	29.9427	25.8299	NaN	29.9194	30.4771	K	2	___1	1	7.67469e-240
P13929;P13929-2;E5RGZ4;P13929-3;K7EKN2;K7EPM1;E5RI09;E5RG95	P13929	Beta-enolase;Enolase	ENO3	KFGANAILGVSLAVCKAGAAEKGVPLYRHIA	120	NaN	NaN	NaN	NaN	NaN	NaN	NaN	20.778	NaN	NaN	NaN	NaN	NaN	NaN	K	3	___1	1	3.03226e-06
P13929;P13929-2;E5RGZ4;P13929-3;K7EKN2;K7EPM1;E5RI09;E5RG95	P13929	Beta-enolase;Enolase	ENO3	DSRGNPTVEVDLHTAKGRFRAAVPSGASTGI	28	25.4573	NaN	22.2321	24.8591	24.4864	24.3846	23.8384	24.6336	24.145	22.4829	24.5058	21.8863	24.1134	25.6584	K	3	___1	1	1.01372e-62
P13929;P13929-2;E5RGZ4;K7EKN2;K7EPM1;E5RI09;E5RG95	P13929	Beta-enolase;Enolase	ENO3	LRDGDKGRYLGKGVLKAVENINNTLGPALLQ	64	22.5121	NaN	NaN	NaN	NaN	NaN	NaN	23.2106	NaN	NaN	NaN	NaN	NaN	NaN	K	3	___1	1	4.6031e-35
P13929;P13929-2;E5RGZ4;P13929-3	P13929	Beta-enolase;Enolase	ENO3	DFKSPDDPARHITGEKLGELYKSFIKNYPVV	275	29.0613	22.8644	24.1755	25.1057	26.3485	24.8318	23.9961	29.6823	20.3323	26.8069	25.8129	24.3147	25.5943	25.9587	K	2	___1	1	2.02316e-38
P13929;P13929-2;E5RGZ4;P13929-3	P13929	Beta-enolase;Enolase	ENO3	DPARHITGEKLGELYKSFIKNYPVVSIEDPF	281	25.8796	27.8573	28.0591	29.053	28.2645	28.2784	27.4396	27.8878	25.2982	28.102	29.2193	28.3831	27.6659	28.934	K	2	___1	1	0.000115448
P13929;P13929-2;P13929-3	P13929	Beta-enolase	ENO3	DLTVTNPKRIAQAVEKKACNCLLLKVNQIGS	334	30.3222	23.5054	28.5918	29.0871	27.6882	28.6597	28.0507	30.6965	27.2181	28.3696	28.9596	25.481	28.3948	28.6404	K	2	___1	1	0.00645978
P13929;P13929-2;P13929-3	P13929	Beta-enolase	ENO3	AKYNQLMRIEEALGDKAIFAGRKFRNPKAK_	420	22.7452	28.021	27.5941	29.1627	28.5941	27.1122	25.8426	27.6215	28.4253	27.6395	28.9386	28.3872	27.6471	29.3705	K	2	___1	1	6.77416e-81
P13929;P13929-2;E5RGZ4;P13929-3;K7EKN2	P13929	Beta-enolase;Enolase	ENO3	FKEAMRIGAEVYHHLKGVIKAKYGKDATNVG	193	25.5547	NaN	NaN	NaN	NaN	NaN	NaN	24.9757	NaN	NaN	NaN	NaN	NaN	NaN	K	3	___1	1	1.13049e-14
P13929;P13929-2;E5RGZ4;K7EKN2;K7EPM1;E5RI09;E5RG95	P13929	Beta-enolase;Enolase	ENO3	GPALLQKKLSVVDQEKVDKFMIELDGTENKS	89	31.2465	29.2269	28.563	23.3843	23.5225	29.5017	29.4013	31.0354	26.1258	28.6091	24.5797	21.3082	29.6396	29.5089	K	2	___1	1	1.59907e-13
P13929;P13929-2;E5RGZ4;K7EKN2;K7EPM1;E5RI09;E5RG95	P13929	Beta-enolase;Enolase	ENO3	LLQKKLSVVDQEKVDKFMIELDGTENKSKFG	92	26.2365	25.7558	26.8517	27.8105	28.0673	27.9703	26.2524	26.8546	26.8688	28.3755	28.3277	27.2425	27.5362	28.0233	K	2	___1	1	1.1321e-67
P13929;E5RGZ4;P13929-3;K7EKN2;K7EPM1	P13929	Beta-enolase;Enolase	ENO3	AMQEFMILPVGASSFKEAMRIGAEVYHHLKG	179	23.5256	25.521	26.5904	26.6594	26.5955	25.2212	25.269	25.622	NaN	27.7148	27.6067	25.667	26.7081	26.8313	K	3	___1	1	3.97442e-17
P13929;P13929-2;E5RGZ4;P13929-3	P13929	Beta-enolase;Enolase	ENO3	VIGMDVAASEFYRNGKYDLDFKSPDDPARHI	256	28.2473	23.0914	24.354	25.8321	25.0659	25.4126	24.0605	28.3018	24.0427	26.3911	25.5258	24.0277	24.6458	25.6777	K	2	___1	1	0.000397872
P13929;P13929-2;E5RGZ4;P13929-3	P13929	Beta-enolase;Enolase	ENO3	AASEFYRNGKYDLDFKSPDDPARHITGEKLG	262	25.3626	NaN	NaN	NaN	21.2501	NaN	NaN	25.0135	NaN	NaN	20.7382	21.1691	NaN	NaN	K	2	___1	1	8.42305e-16
P13929;P13929-2;E5RGZ4;P13929-3	P13929	Beta-enolase;Enolase	ENO3	LELLKTAIQAAGYPDKVVIGMDVAASEFYRN	239	22.6492	NaN	NaN	NaN	NaN	NaN	NaN	23.1428	NaN	24.2838	24.8365	24.6495	23.5099	NaN	K	3	___1	1	4.08566e-28
P14618;P14618-3;B4DNK4;P14618-2;H3BTN5;H3BR70	P14618;P14618-2	Pyruvate kinase PKM;Pyruvate kinase	PKM	GKPVICATQMLESMIKKPRPTRAEGSDVANA	336	25.135	NaN	NaN	NaN	NaN	NaN	NaN	25.2585	NaN	23.1991	22.7854	20.6958	21.7905	22.7443	K	3	___1	1	9.85163e-10
P14618;P14618-3;B4DNK4;H3BQ34;P14618-2;H3BTN5	P14618;P14618-2	Pyruvate kinase PKM;Pyruvate kinase	PKM	DFLVTEVENGGSLGSKKGVNLPGAAVDLPAV	206	24.1988	24.6998	NaN	26.0818	23.5078	25.0485	NaN	24.527	25.3577	24.3807	23.8706	NaN	24.0628	NaN	K	3	___1	1	9.39626e-76
P14618;P14618-3;B4DNK4;H3BQ34;H3BT25;H3BUW1;H3BTJ2;P14618-2;H3BTN5	P14618;P14618-2	Pyruvate kinase PKM;Pyruvate kinase	PKM	GSGTAEVELKKGATLKITLDNAYMEKCDENI	141	NaN	NaN	NaN	22.2504	21.1751	21.5817	NaN	NaN	NaN	NaN	NaN	NaN	NaN	NaN	K	2	___1	1	4.55338e-10
P14618;P14618-3;B4DNK4;P30613-2;P30613;P14618-2;H3BTN5;H3BR70	P14618;P14618-2	Pyruvate kinase PKM;Pyruvate kinase;Pyruvate kinase PKLR	PKM;PKLR	IMVARGDLGIEIPAEKVFLAQKMMIGRCNRA	305	24.7612	NaN	23.3087	25.4835	24.0916	24.4975	23.8553	25.6363	23.7654	25.2071	26.0724	22.5568	23.949	25.5054	K	2	___1	1	5.15304e-21
P14618;P14618-3;B4DNK4;P30613-2;P30613;P14618-2;H3BTN5;H3BR70	P14618;P14618-2	Pyruvate kinase PKM;Pyruvate kinase;Pyruvate kinase PKLR	PKM;PKLR	DLGIEIPAEKVFLAQKMMIGRCNRAGKPVIC	311	22.7523	21.4607	23.6823	24.3313	24.6431	25.3109	24.312	22.9954	23.0874	24.3067	25.5272	23.5337	25.4227	25.4831	K	2	___1	1	5.47143e-05
P14618;P14618-3;H3BQ34;H3BT25;H3BUW1;H3BTJ2;P14618-2;H3BTN5	P14618;P14618-2	Pyruvate kinase PKM;Pyruvate kinase	PKM	RTGLIKGSGTAEVELKKGATLKITLDNAYME	135	27.2147	23.5629	26.5316	27.1125	25.9469	26.64	26.8423	28.2669	NaN	26.6031	27.1707	20.5486	25.3496	27.0873	K	2	___1	1	1.92059e-07
P14618;P14618-3;B4DNK4;H3BQ34;P14618-2;H3BTN5;H3BR70	P14618;P14618-2	Pyruvate kinase PKM;Pyruvate kinase	PKM	VNLPGAAVDLPAVSEKDIQDLKFGVEQDVDM	224	21.9877	24.1143	25.4872	25.3189	24.6566	23.8776	24.6904	26.0375	NaN	25.9235	26.6435	25.4171	25.538	26.2703	K	3	___1	1	1.17579e-129
P14618;P14618-3;B4DNK4;H3BQ34;P14618-2;H3BTN5	P14618;P14618-2	Pyruvate kinase PKM;Pyruvate kinase	PKM	GSKIYVDDGLISLQVKQKGADFLVTEVENGG	186	NaN	NaN	NaN	NaN	NaN	NaN	NaN	NaN	NaN	23.1388	21.5895	NaN	NaN	NaN	K	2	___1	1	1.33704e-05
P14618;H3BQ34;H3BT25;H3BUW1;H3BTJ2;P14618-2;H3BTN5	P14618;P14618-2	Pyruvate kinase PKM;Pyruvate kinase	PKM	LNFSHGTHEYHAETIKNVRTATESFASDPIL	89	26.1273	NaN	NaN	NaN	NaN	NaN	NaN	25.5406	NaN	NaN	NaN	NaN	NaN	NaN	K	4	___1	1	4.30137e-107
P14618;H3BQ34;H3BT25;H3BUW1;H3BTJ2;H3BU13;P14618-2;H3BTN5	P14618;P14618-2	Pyruvate kinase PKM;Pyruvate kinase	PKM	IICTIGPASRSVETLKEMIKSGMNVARLNFS	62	22.3805	NaN	22.5714	24.4251	23.9032	24.1504	23.5315	24.2561	21.6308	23.2967	23.8815	21.758	24.2217	25.5117	K	2	___1	1	0.000262023
P14618;P14618-3;B4DNK4;P14618-2;H3BR70	P14618;P14618-2	Pyruvate kinase PKM;Pyruvate kinase	PKM	AEDVDLRVNFAMNVGKARGFFKKGDVVIVLT	498	23.2571	25.0551	23.5568	23.5333	23.5116	23.9739	22.2977	24.0461	20.8214	22.816	24.1704	23.0425	23.0052	24.7444	K	2	___1	1	1.44409e-10
P14621;U3KQL2;U3KPX8	P14621	Acylphosphatase-2	ACYP2	TSKGTVTGQVQGPEDKVNSMKSWLSKVGSPS	58	NaN	NaN	19.1335	22.0897	21.3908	20.4875	NaN	NaN	20.051	NaN	22.177	20.9126	19.7489	21.8425	K	2	___1	1	3.87098e-23
P14621;U3KQL2;U3KPX8	P14621	Acylphosphatase-2	ACYP2	SRIDRTNFSNEKTISKLEYSNFSIRY_____	89	24.3487	NaN	25.8611	23.3348	NaN	NaN	NaN	24.6651	23.9287	27.9257	26.8991	NaN	25.9867	24.4246	K	2	___1	1	1.19807e-15
P14621;U3KQL2;U3KPX8	P14621	Acylphosphatase-2	ACYP2	GSPSSRIDRTNFSNEKTISKLEYSNFSIRY_	85	23.3461	24.7116	24.1919	24.2909	24.3725	24.1222	NaN	24.7243	22.4247	23.7363	24.6016	24.1535	23.879	24.2161	K	2	___1	1	9.79313e-08
P14649;F8W1I5;F8VSA2	P14649	Myosin light chain 6B	MYL6B	KKDVPVKKPAGPSISKPAAKPAAAGAPPAKT	19	NaN	NaN	NaN	20.1135	22.8136	NaN	NaN	NaN	NaN	NaN	NaN	22.9688	NaN	NaN	K	2	___1	0.999999	0.00517658
P14735;P14735-2	P14735	Insulin-degrading enzyme	IDE	RANGIQGLRFIIQSEKPPHYLESRVEAFLIT	854	NaN	NaN	NaN	NaN	NaN	NaN	NaN	21.4948	NaN	NaN	NaN	NaN	NaN	NaN	K	3	___1	1	3.0233e-05
P14854;K7EQD3	P14854	Cytochrome c oxidase subunit 6B1	COX6B1	___MAEDMETKIKNYKTAPFDSRFPNQNQTR	13	26.2712	NaN	25.0426	25.8967	26.0342	25.4855	25.4228	27.3823	24.6311	26.2947	26.7529	23.3911	25.8443	26.8787	K	2	___1	1	0.000118232
P14927;B7Z2R2;P14927-2;E5RHG9	P14927	Cytochrome b-c1 complex subunit 7	UQCRB	NDRMFRIKRALDLNLKHQILPKEQWTKYEEE	72	24.0042	22.78	NaN	22.9573	24.7091	22.149	NaN	24.9778	NaN	22.103	23.7645	25.2761	23.1699	24.2299	K	3	___1	1	5.3257e-20
P14927	P14927	Cytochrome b-c1 complex subunit 7	UQCRB	WTKYEEENFYLEPYLKEVIRERKEREEWAKK	96	22.0045	NaN	NaN	NaN	NaN	NaN	NaN	21.0102	NaN	24.3896	23.8804	22.4542	NaN	NaN	K	2	___1	1	7.13056e-107
P15259	P15259	Phosphoglycerate mutase 2	PGAM2	ARALPFWNEEIVPQIKAGKRVLIAAHGNSLR	176	NaN	NaN	NaN	NaN	NaN	NaN	NaN	21.4094	NaN	NaN	NaN	NaN	NaN	NaN	K	3	___1	1	0.000321501
P15259	P15259	Phosphoglycerate mutase 2	PGAM2	PPPMDEKHPYYNSISKERRYAGLKPGELPTC	138	NaN	NaN	NaN	NaN	NaN	NaN	NaN	22.9066	NaN	NaN	NaN	NaN	NaN	NaN	K	3	___1	1	0.0017967
P15259;P18669;Q8N0Y7	P15259;P18669	Phosphoglycerate mutase 2;Phosphoglycerate mutase 1;Probable phosphoglycerate mutase 4	PGAM2;PGAM1;PGAM4	WRLNERHYGGLTGLNKAETAAKHGEAQVKIW;WRLNERHYGGLTGLNKAETAAKHGEEQVKIW	100	22.8882	NaN	NaN	NaN	NaN	NaN	NaN	22.5447	NaN	NaN	NaN	NaN	NaN	NaN	K	3	___1	1	6.55263e-17
P15259	P15259	Phosphoglycerate mutase 2	PGAM2	IWRRSFDIPPPPMDEKHPYYNSISKERRYAG	129	28.169	25.1811	24.8077	24.9596	26.4557	25.0017	24.3758	28.6438	24.7403	27.0017	26.5953	25.85	25.243	25.6457	K	3	___1	1	5.64269e-17
P15259	P15259	Phosphoglycerate mutase 2	PGAM2	PYYNSISKERRYAGLKPGELPTCESLKDTIA	146	22.483	NaN	NaN	22.4344	21.2185	21.3458	NaN	23.2017	23.4433	22.7943	NaN	23.7107	22.7339	24.5885	K	2	___1	1	1.1757e-05
P15259	P15259	Phosphoglycerate mutase 2	PGAM2	YAGLKPGELPTCESLKDTIARALPFWNEEIV	157	24.0128	NaN	NaN	NaN	NaN	NaN	NaN	24.3879	NaN	25.0866	22.8132	NaN	NaN	NaN	K	3	___1	1	1.70226e-39
P15531;P15531-2;E7ERL0;J3KPD9;E5RHP0;C9K028;F6XY72;Q32Q12;P22392-2;P22392	P15531;Q32Q12	Nucleoside diphosphate kinase A;Nucleoside diphosphate kinase;Nucleoside diphosphate kinase B	NME1;NME2;NME1-NME2	IKPDGVQRGLVGEIIKRFEQKGFRLVGLKFM	26	20.5651	NaN	NaN	NaN	21.8052	NaN	NaN	22.8986	NaN	NaN	21.3182	21.7978	20.2588	21.3826	K	2	___1	1	0.00773838
Q5TD07;P16083;Q5TD05	Q5TD07	Ribosyldihydronicotinamide dehydrogenase [quinone]	NQO2	AYKQRSLASDITDEQKKVREADLVIFQGKLA	90	NaN	22.997	22.7413	19.1476	20.8052	NaN	NaN	NaN	18.935	NaN	NaN	20.8742	NaN	NaN	K	2	___1	1	4.27583e-39
P16157-7;P16157-13;P16157-15;P16157-16;P16157-3;P16157-12;P16157-14;H0YBS0;P16157-2;P16157-11;P16157-9;P16157-6;P16157-4;P16157-10;P16157-8;P16157-5;P16157;P16157-21	P16157-7	Ankyrin-1	ANK1	LVPLVQATFPENAVTKRVKLALQAQPVPDEL	1102	NaN	NaN	NaN	NaN	NaN	NaN	NaN	22.1228	22.5166	NaN	NaN	NaN	23.7191	NaN	K	3	___1	1	6.34785e-16
P16219;E9PE82	P16219	Short-chain specific acyl-CoA dehydrogenase, mitochondrial	ACADS	ETHQMLLQTCRDFAEKELFPIAAQVDKEHLF	51	23.9685	23.3458	24.479	22.6775	26.8599	25.3436	25.3266	25.4821	22.4778	26.8452	25.843	25.6123	26.2773	25.961	K	2	___1	1	2.20238e-36
P16219;E9PE82	P16219	Short-chain specific acyl-CoA dehydrogenase, mitochondrial	ACADS	RIPKDSILGEPGMGFKIAMQTLDMGRIGIAS	262	21.2397	23.1727	22.0861	NaN	24.3377	24.4656	NaN	21.6521	NaN	26.3504	25.8196	23.8189	23.0451	23.8899	K	3	___1	1	1.36812e-14
P16219;E9PE82	P16219	Short-chain specific acyl-CoA dehydrogenase, mitochondrial	ACADS	AAQVDKEHLFPAAQVKKMGGLGLLAMDVPEE	72	22.297	22.0418	21.9823	20.4334	24.4059	24.0319	22.7674	24.3246	22.9659	23.9964	21.6922	21.3578	24.6582	24.7656	K	2	___1	1	4.26273e-08
P16219;E9PE82	P16219	Short-chain specific acyl-CoA dehydrogenase, mitochondrial	ACADS	SAFLVPMPTPGLTLGKKEDKLGIRGSSTANL	226	NaN	NaN	23.9442	24.1253	25.7421	25.8306	25.0871	NaN	NaN	23.8515	NaN	23.8395	26.067	24.5736	K	3	___1	1	5.06902e-14
P16219;E9PE82	P16219	Short-chain specific acyl-CoA dehydrogenase, mitochondrial	ACADS	VNYAENRMAFGAPLTKLQVIQFKLADMALAL	306	NaN	NaN	24.7889	23.3826	25.6079	25.2794	22.7834	NaN	NaN	NaN	22.6597	24.2571	24.4246	23.2677	K	2	___1	1	1.52949e-17
P16233	P16233	Pancreatic triacylglycerol lipase	PNLIP	YNNVINPTLPRVGASKIIVETNVGKQFNFCS	435	NaN	21.3407	21.941	22.986	20.6661	23.6771	20.4286	NaN	NaN	24.1503	22.4892	NaN	20.0245	20.8645	K	2	___1	1	0.00656931
P16401	P16401	Histone H1.5	HIST1H1B	AKRKATGPPVSELITKAVAASKERNGLSLAA	49	NaN	NaN	NaN	NaN	NaN	NaN	NaN	20.774	NaN	NaN	NaN	23.4331	21.9201	21.431	K	2	___1	1	1.33873e-34
P16402	P16402	Histone H1.3	HIST1H1D	SETAPLAPTIPAPAEKTPVKKKAKKAGATAG	17	NaN	NaN	NaN	NaN	NaN	NaN	NaN	NaN	NaN	NaN	NaN	22.9782	NaN	NaN	K	3	___1	0.505789	0.00262098
P16403	P16403	Histone H1.2	HIST1H1C	SETAPAAPAAAPPAEKAPVKKKAAKKAGGTP	17	23.5447	24.0283	23.3995	25.346	25.6431	24.6157	23.2585	23.4271	22.5665	22.9452	25.1102	26.5052	24.7104	24.9319	K	3	___1	1	1.66714e-18
P16615-2;P16615-5;P16615-3;P16615	P16615-2	Sarcoplasmic/endoplasmic reticulum calcium ATPase 2	ATP2A2	AVGDKVPADIRLTSIKSTTLRVDQSILTGES	169	NaN	NaN	NaN	21.5117	22.0225	22.1109	21.537	NaN	NaN	NaN	NaN	18.4261	22.0352	21.3558	K	2	___1	1	0.00517203
P16615-2;P16615-5;P16615-3;P16615;P16615-4;H7C5W9	P16615-2	Sarcoplasmic/endoplasmic reticulum calcium ATPase 2	ATP2A2	LTCLVEKMNVFDTELKGLSKIERANACNSVI	460	NaN	NaN	NaN	NaN	NaN	NaN	NaN	20.8802	NaN	NaN	24.2959	NaN	22.1566	NaN	K	2	___1	1	0.000780035
P16615-2;P16615-5;P16615-3;P16615;P16615-4;H7C5W9	P16615-2	Sarcoplasmic/endoplasmic reticulum calcium ATPase 2	ATP2A2	SVYCTPNKPSRTSMSKMFVKGAPEGVIDRCT	510	22.5712	22.1564	22.7954	23.8874	23.5048	23.1453	24.3189	23.4166	21.6626	22.3373	22.5293	20.8137	23.3113	23.8516	K	2	___1	1	0.000432404
P16989;P16989-3;P16989-2;A0A0D9SEI8;P67809;H0Y449	P16989;P16989-2;P67809	Y-box-binding protein 3;Nuclease-sensitive element-binding protein 1	YBX3;YBX1	RNDTKEDVFVHQTAIKKNNPRKYLRSVGDGE	124	23.3527	NaN	NaN	NaN	20.4325	NaN	NaN	21.3417	NaN	NaN	NaN	NaN	NaN	NaN	K	3	___1	1	0.000567033
P17096;P17096-3;P17096-2	P17096	High mobility group protein HMG-I/HMG-Y	HMGA1	_MSESSSKSSQPLASKQEKDGTEKRGRGRPR	15	23.8343	NaN	21.081	21.6342	NaN	21.4381	20.1644	23.0697	NaN	21.6948	21.5438	NaN	21.8623	23.0253	K	2	___1	1	0.00150149
P17174;P17174-2	P17174	Aspartate aminotransferase, cytoplasmic	GOT1	GKEPESILQVLSQMEKIVRITWSNPPAQGAR	290	21.2843	NaN	NaN	NaN	NaN	NaN	NaN	21.6395	NaN	NaN	NaN	NaN	NaN	NaN	K	3	___1	1	2.88156e-07
P17174;P17174-2	P17174	Aspartate aminotransferase, cytoplasmic	GOT1	SCASRLALGDDSPALKEKRVGGVQSLGGTGA	97	23.8418	22.7529	22.6594	24.218	24.3187	23.8861	23.6043	23.8018	22.946	23.0584	24.1037	21.8053	23.6006	25.1554	K	2	___1	1	1.96541e-05
P17540	P17540	Creatine kinase S-type, mitochondrial	CKMT2	YLVDCEKKLERGQDIKVPPPLPQFGKK____	408	20.4292	NaN	22.8265	23.8821	23.6588	24.202	24.1663	21.9918	22.2699	NaN	23.2772	20.0258	23.2517	25.755	K	2	___1	1	0.000205843
P17540	P17540	Creatine kinase S-type, mitochondrial	CKMT2	RGQDIKVPPPLPQFGKK______________	418	22.7655	23.7998	23.3781	24.2913	25.577	24.5036	NaN	24.3612	NaN	22.0398	23.0595	25.1232	23.7976	25.2848	K	2	___1	1	0.000776119
P17540	P17540	Creatine kinase S-type, mitochondrial	CKMT2	EQDQQRLIDDHFLFDKPVSPLLTCAGMARDW	230	24.2542	NaN	NaN	NaN	NaN	NaN	NaN	23.743	NaN	NaN	NaN	NaN	NaN	NaN	K	3	___1	1	4.75136e-17
P17540;P12532;P12532-2;F8WCN3	P17540	Creatine kinase S-type, mitochondrial;Creatine kinase U-type, mitochondrial	CKMT2;CKMT1A;CKMT1B	IWINEEDHTRVISMEKGGNMKRVFERFCRGL	276	32.5491	28.1386	29.6496	30.2579	28.5876	30.0325	29.7767	31.7997	29.5556	28.9794	30.3625	29.4271	30.4666	30.9925	K	2	___1	1	2.30619e-10
P17540	P17540	Creatine kinase S-type, mitochondrial	CKMT2	TALEGLKGDLAGRYYKLSEMTEQDQQRLIDD	209	23.4052	22.4093	22.0856	21.2245	23.3151	23.5068	22.5526	25.2063	22.2895	24.3405	22.3101	22.146	23.1111	24.4201	K	2	___1	1	1.3739e-45
P17612-2;P17612;A0A087WVC4;A0A0A0MS54;P22694-10;P22694-4;P22694-3;P22694;P22694-5;P22694-7;P22694-6;P22694-9;P22694-2	P17612-2	cAMP-dependent protein kinase catalytic subunit alpha;cAMP-dependent protein kinase catalytic subunit beta	PRKACA;PRKACB	DLKDLLRNLLQVDLTKRFGNLKNGVNDIKNH	272	21.4258	NaN	21.2457	22.8553	22.9129	24.3039	22.0689	22.7373	21.6712	23.7531	23.2349	NaN	22.5436	22.3946	K	2	___1	1	9.18266e-05
P17661	P17661	Desmin	DES	VERDNLLDDLQRLKAKLQEEIQLKEEAENNL	193	21.9138	NaN	21.02	24.1496	22.3346	NaN	NaN	21.8502	22.888	NaN	23.2496	21.3105	22.7053	23.8736	K	2	___1	1	8.05471e-05
P17661	P17661	Desmin	DES	VELQELNDRFANYIEKVRFLEQQNAALAAEV	125	25.5855	NaN	23.4171	24.6249	24.0086	23.9703	23.5385	25.673	NaN	24.7972	25.3867	23.1177	25.0794	25.0366	K	2	___1	1	0.000388369
P17661	P17661	Desmin	DES	LERRIESLNEEIAFLKKVHEEEIRELQAQLQ	240	23.712	23.626	24.797	NaN	NaN	25.1328	25.26	24.1194	23.4517	26.3792	27.7441	25.0894	24.9227	24.1842	K	2	___1	1	3.35581e-44
P17661	P17661	Desmin	DES	EQRGSEVHTKKTVMIKTIETRDGEVVSEATQ	449	NaN	21.5201	20.4768	23.3195	21.0241	22.3983	NaN	NaN	20.9606	NaN	23.5493	23.2978	22.9069	23.3778	K	2	___1	1	0.00106812
P17858;P17858-2	P17858	ATP-dependent 6-phosphofructokinase, liver type	PFKL	GLKKKAVAFSPVTELKKDTDFEHRMPREQWW	726	NaN	NaN	NaN	23.0568	NaN	21.4601	20.1272	NaN	NaN	NaN	NaN	NaN	21.8936	NaN	K	2	___1	1	0.00314069
P17987;E7ERF2;E7EQR6;F5H282;F5GZ03	P17987	T-complex protein 1 subunit alpha	TCP1	CDEMERSLHDALCVVKRVLESKSVVPGGGAV	400	24.6385	NaN	NaN	NaN	NaN	NaN	NaN	23.7373	NaN	21.5826	21.2649	NaN	20.323	NaN	K	2	___1	1	1.81905e-07
P18206-2;P18206	P18206-2	Vinculin	VCL	SPQARALASQLQDSLKDLKARMQEAMTQEVS	581	21.0057	NaN	NaN	NaN	NaN	NaN	NaN	21.2244	NaN	NaN	NaN	NaN	NaN	NaN	K	2	___1	1	0.000562258
P18206-2;P18206	P18206-2	Vinculin	VCL	ANFENHSGKLGATAEKAAAVGTANKSTVEGI	646	NaN	22.4142	21.8024	22.5666	21.6107	22.0909	20.5596	NaN	20.9895	20.8117	22.1337	NaN	22.369	23.2129	K	2	___1	1	3.25854e-46
P18206-2;P18206	P18206-2	Vinculin	VCL	AIDTKSLLDASEEAIKKDLDKCKVAMANIQP	731	NaN	NaN	NaN	20.6463	NaN	21.4029	NaN	21.0366	NaN	NaN	NaN	NaN	NaN	NaN	K	2	___1	1	0.00136016
P18859;P18859-2;A8MUH2	P18859	ATP synthase-coupling factor 6, mitochondrial	ATP5J	GVTAVAFNKELDPIQKLFVDKIREYKSKRQT	41	27.281	29.3952	30.7248	30.4016	31.479	31.2786	30.3009	32.0468	30.2305	33.0063	31.3174	29.2358	31.2798	31.1668	K	2	___1	1	3.88087e-38
P18859;P18859-2	P18859	ATP synthase-coupling factor 6, mitochondrial	ATP5J	NADMNTFPTFKFEDPKFEVIEKPQA______	99	27.7223	26.2242	26.5019	27.1191	28.1116	27.4281	25.964	28.627	28.1833	28.4773	27.7514	29.7648	27.8412	28.482	K	2	___1	1	1.23579e-06
P18859;P18859-2	P18859	ATP synthase-coupling factor 6, mitochondrial	ATP5J	FPTFKFEDPKFEVIEKPQA____________	105	NaN	27.2519	27.3163	27.0721	28.3272	27.8059	26.334	26.9309	24.912	29.214	28.1194	21.8783	27.4457	27.5445	K	2	___1	1	0.000138521
P18859;P18859-2	P18859	ATP synthase-coupling factor 6, mitochondrial	ATP5J	KQMFGNADMNTFPTFKFEDPKFEVIEKPQA_	94	23.4922	NaN	NaN	NaN	NaN	NaN	NaN	27.1386	21.4781	27.7502	25.7549	23.83	23.9016	21.6531	K	3	___1	1	2.56485e-77
P19338;C9JYW2;C9JLB1;C9J1H7;C9JWL1	P19338	Nucleolin	NCL	AKAVTTPGKKGATPGKALVATPGKKGAAIPA	116	NaN	NaN	NaN	21.5647	NaN	19.8174	NaN	NaN	21.4865	NaN	NaN	23.4282	NaN	21.6868	K	2	___1	1	0.000405534
P19338;C9JYW2;C9JLB1;C9J1H7;C9JWL1	P19338	Nucleolin	NCL	KKAAATPAKKTVTPAKAVTTPGKKGATPGKA	102	NaN	NaN	NaN	NaN	NaN	NaN	NaN	NaN	NaN	NaN	NaN	20.5034	NaN	NaN	K	2	___1	1	0.00087945
P19367-4;P19367-2;P19367;P19367-3	P19367-4	Hexokinase-1	HK1	LLFEGRITPELLTRGKFNTSDVSAIEKNKEG	321	NaN	22.1585	23.5324	22.8699	22.4562	NaN	22.8951	22.4546	NaN	23.3351	23.2019	NaN	21.8559	23.0919	K	2	___1	1	7.16059e-20
P20674;H3BRM5;H3BV69	P20674	Cytochrome c oxidase subunit 5A, mitochondrial	COX5A	LNELGISTPEELGLDKV______________	149	18.2348	NaN	NaN	NaN	NaN	NaN	NaN	21.1006	NaN	NaN	NaN	NaN	NaN	NaN	K	2	___1	1	7.40737e-16
P20700;E9PBF6;A0A0D9SFE5;A0A0D9SFY5;Q03252	P20700;Q03252	Lamin-B1;Lamin-B2	LMNB1;LMNB2	PATPLSPTRLSRLQEKEELRELNDRLAHYID;PTTPLSPTRLSRLQEKEELRELNDRLAVYID	47	NaN	NaN	21.6463	22.488	NaN	22.6985	22.2337	22.4366	NaN	NaN	22.7932	20.8378	22.5571	20.5687	K	2	___1	1	0.00384029
P20774;Q5TBF5	P20774	Mimecan	OGN	LKLPVLPPKLTLFNAKYNKIKSRGIKANAFK	195	24.0484	NaN	20.9114	22.9676	22.4701	22.6122	22.1769	23.9075	NaN	22.1525	23.1011	22.743	22.6947	21.8722	K	2	___1	1	0.000124875
P20962;F5H7R9;F5GXR3	P20962	Parathymosin	PTMS	_MSEKSVEAAAELSAKDLKEKKEKVEEKASR	15	22.8317	21.5299	21.1042	23.7526	23.7641	22.6511	22.4214	23.583	22.298	23.6859	24.0081	24.416	23.789	24.4324	K	2	___1	1	5.01541e-37
Q60FE5;P21333-2;P21333;Q5HY54;A0A087WWY3;F8WE98;Q14315-2;Q14315	Q60FE5;Q14315-2	Filamin-A;Filamin-C	FLNA;FLNC	ADFKVFTKGAGSGELKVTVKGPKGTEEPVKV;ADFKVYTKGAGSGELKVTVKGPKGEERVKQK	510	NaN	22.726	22.1874	22.5589	NaN	22.0361	22.5437	NaN	21.6266	21.8524	22.1567	21.7244	22.4056	22.6657	K	2	___1	1	0.00207347
P21695-2;P21695	P21695-2	Glycerol-3-phosphate dehydrogenase [NAD(+)], cytoplasmic	GPD1	GKSIEQLEKELLNGQKLQGPETARELYSILQ	273	NaN	NaN	NaN	NaN	NaN	NaN	NaN	NaN	NaN	21.0813	NaN	NaN	NaN	21.7951	K	2	___1	1	8.97969e-08
P21695-2;P21695	P21695-2	Glycerol-3-phosphate dehydrogenase [NAD(+)], cytoplasmic	GPD1	GISLIKGVDEGPNGLKLISEVIGERLGIPMS	107	NaN	NaN	NaN	NaN	NaN	NaN	NaN	20.1715	NaN	NaN	NaN	NaN	NaN	NaN	K	3	___1	1	0.00266831
P21695-2;P21695	P21695-2	Glycerol-3-phosphate dehydrogenase [NAD(+)], cytoplasmic	GPD1	GKKLTEIINTQHENVKYLPGHKLPPNVFIGK	62	24.5784	NaN	NaN	NaN	NaN	NaN	NaN	24.7695	NaN	NaN	NaN	NaN	NaN	NaN	K	3	___1	1	1.62344e-26
P21796	P21796	Voltage-dependent anion-selective channel protein 1	VDAC1	AWTAGNSNTRFGIAAKYQIDPDACFSAKVNN	224	24.0604	24.68	NaN	NaN	22.9835	23.4357	22.6829	23.7243	NaN	25.9158	25.0035	22.1182	24.3073	24.2535	K	2	___1	1	1.20456e-63
P21796;C9JI87	P21796	Voltage-dependent anion-selective channel protein 1	VDAC1	LGTEITVEDQLARGLKLTFDSSFSPNTGKKN	96	NaN	22.6963	22.6789	NaN	NaN	22.2727	NaN	NaN	NaN	23.7861	22.7615	NaN	22.9121	21.6923	K	2	___1	1	2.00767e-36
P21796;C9JI87	P21796	Voltage-dependent anion-selective channel protein 1	VDAC1	GLKLTFDSSFSPNTGKKNAKIKTGYKREHIN	109	NaN	NaN	NaN	21.2425	20.8005	21.6037	21.3022	NaN	21.2968	NaN	21.9191	22.0095	21.7978	23.1903	K	2	___1	1	3.90555e-25
P21796	P21796	Voltage-dependent anion-selective channel protein 1	VDAC1	LSALLDGKNVNAGGHKLGLGLEFQA______	274	NaN	NaN	NaN	NaN	NaN	NaN	NaN	NaN	NaN	24.217	20.9385	NaN	23.3269	NaN	K	2	___1	1	1.41802e-71
P21796	P21796	Voltage-dependent anion-selective channel protein 1	VDAC1	VNNSSLIGLGYTQTLKPGIKLTLSALLDGKN	252	22.2161	23.9342	21.3991	24.6306	24.5407	23.61	23.2587	21.9933	NaN	24.0439	23.4307	NaN	23.4974	25.2764	K	3	___1	1	2.70327e-59
P21796;C9JI87	P21796	Voltage-dependent anion-selective channel protein 1	VDAC1	SANTETTKVTGSLETKYRWTEYGLTFTEKWN	61	NaN	21.397	NaN	20.718	20.3292	20.6473	20.3516	21.949	22.3484	20.4047	21.211	NaN	21.2838	22.7555	K	2	___1	1	5.05676e-05
P21817-3;P21817-2;P21817;M0R014	P21817-3	Ryanodine receptor 1	RYR1	PYDTLTAKEKARDREKAQELLKFLQMNGYAV	2922	NaN	20.5411	NaN	NaN	21.9683	22.649	20.9104	23.3839	22.8113	21.5244	22.0938	21.9948	NaN	22.9741	K	2	___1	1	0.000889016
P21817-3;P21817-2;P21817	P21817-3	Ryanodine receptor 1	RYR1	HEAVLPRERLHLEPIKEYRREGPRGPHLVGP	826	22.4099	NaN	NaN	NaN	NaN	NaN	NaN	24.9383	NaN	NaN	NaN	NaN	NaN	NaN	K	2	___1	1	0.00338978
P21912;A0A087WWT1	P21912	Succinate dehydrogenase [ubiquinone] iron-sulfur subunit, mitochondrial	SDHB	KKFAIYRWDPDKAGDKPHMQTYEVDLNKCGP	55	27.6697	22.4323	24.0615	23.1091	24.8655	25.1178	24.546	27.8583	24.6962	26.255	25.3344	22.7376	24.8555	25.2508	K	3	___1	1	5.07227e-22
P21912	P21912	Succinate dehydrogenase [ubiquinone] iron-sulfur subunit, mitochondrial	SDHB	WMIDSRDDFTEERLAKLQDPFSLYRCHTIMN	233	23.8938	NaN	24.3481	23.4087	25.0958	23.8422	NaN	25.4613	NaN	25.6857	NaN	24.8262	NaN	24.1897	K	2	___1	1	1.696e-17
P22033	P22033	Methylmalonyl-CoA mutase, mitochondrial	MUT	EEMGGMAKAVAEGIPKLRIEECAARRQARID	465	NaN	22.3295	21.7938	21.4218	22.5996	22.6059	NaN	22.0005	NaN	21.8772	22.7618	22.456	22.5517	22.8958	K	2	___1	1	0.00177068
P22033	P22033	Methylmalonyl-CoA mutase, mitochondrial	MUT	ANFIVTGEEQGVPKEKLTGTIQNDILKEFMV	212	NaN	NaN	NaN	NaN	NaN	NaN	NaN	NaN	22.7565	NaN	NaN	22.0074	NaN	22.0947	K	2	___1	1	9.91147e-07
P22695;H3BRG4	P22695	Cytochrome b-c1 complex subunit 2, mitochondrial	UQCRC2	ATAAGDVIKAAYNQVKTIAQGNLSNTDVQAA	359	23.2484	NaN	22.1618	21.7212	24.0107	22.4948	22.2736	23.6601	23.6161	23.5677	22.1064	23.7742	22.8878	22.2876	K	3	___1	1	4.85424e-79
P22695;H3BRG4	P22695	Cytochrome b-c1 complex subunit 2, mitochondrial	UQCRC2	TIAQGNLSNTDVQAAKNKLKAGYLMSVESSE	375	NaN	NaN	NaN	NaN	NaN	NaN	NaN	NaN	NaN	NaN	NaN	NaN	19.9539	21.2247	K	2	___1	1	5.70592e-07
P22695;H3BRG4;H3BSJ9;H3BP04;H3BUE4;H3BUI9;A0A087WVZ4	P22695	Cytochrome b-c1 complex subunit 2, mitochondrial	UQCRC2	LRLTSSLTTKGASSFKITRGIEAVGGKLSVT	98	22.4929	23.2554	22.5587	22.0543	22.8541	23.3988	NaN	24.388	22.1763	24.8097	22.5842	23.27	22.0352	NaN	K	2	___1	1	0.00506008
P22695;H3BRG4;H3BSJ9;H3BP04	P22695	Cytochrome b-c1 complex subunit 2, mitochondrial	UQCRC2	PEFRRWEVADLQPQLKIDKAVAFQNPQTHVI	159	22.6652	NaN	NaN	NaN	NaN	NaN	NaN	19.9111	NaN	NaN	NaN	NaN	NaN	NaN	K	2	___1	1	0.000223407
P22830;P22830-2;K7EPN2;K7ELX4	P22830	Ferrochelatase, mitochondrial	FECH	SPIKIWTSKQGEGMVKLLDELSPNTAPHKYY	145	22.2003	NaN	NaN	NaN	NaN	NaN	NaN	21.3046	NaN	NaN	NaN	NaN	NaN	NaN	K	3	___1	1	2.29275e-10
P23109-2;P23109	P23109-2	AMP deaminase 1	AMPD1	HAGRQTFQRFDKFNDKYNPVGASELRDLYLK	407	NaN	NaN	20.1402	20.8044	NaN	21.4591	NaN	21.5892	NaN	NaN	NaN	NaN	NaN	NaN	K	2	___1	1	1.46447e-07
P23109-2;P23109;A0A1B0GTL6	P23109-2	AMP deaminase 1	AMPD1	FKLPEIDDAMRNFAEKVFASEVKDEGGRQEI	52	21.2751	NaN	23.1651	23.5158	23.5442	23.7758	21.3795	21.7367	NaN	23.2731	23.3167	NaN	22.9848	NaN	K	2	___1	1	0.000673888
P23297;Q5T7Y6	P23297	Protein S100-A1;Protein S100	S100A1	LSGFLDAQKDVDAVDKVMKELDENGDGEVDF	57	23.0382	24.4906	23.5885	25.2003	23.5229	23.8717	22.5296	24.6611	23.1114	23.1091	25.0714	24.3842	22.8123	23.636	K	2	___1	1	0.0014058
P23526;P23526-2	P23526	Adenosylhomocysteinase	AHCY	GILKVPAINVNDSVTKSKFDNLYGCRESLID	186	NaN	NaN	NaN	21.282	NaN	NaN	NaN	NaN	NaN	NaN	NaN	NaN	NaN	NaN	K	2	___1	1	0.000855733
P23528;E9PK25;E9PP50;E9PS23;Q9Y281;F8WDN3	P23528;Q9Y281	Cofilin-1;Cofilin-2	CFL1;CFL2	GVAVSDGVIKVFNDMKVRKSSTPEEVKKRKK;GVTVNDEVIKVFNDMKVRKSSTQEEIKKRKK	19	22.1869	23.9736	23.3199	24.0664	23.6706	23.4934	21.9919	22.3758	22.1799	22.4903	23.45	23.7288	23.288	23.1674	K	2	___1	1	0.00110501
P24298	P24298	Alanine aminotransferase 1	GPT	EGTYHFRMTILPPLEKLRLLLEKLSRFHAKF	476	NaN	NaN	NaN	23.0936	23.1709	22.937	22.3343	NaN	NaN	22.9564	22.7093	NaN	23.3316	22.8298	K	2	___1	1	0.00029494
P24310	P24310	Cytochrome c oxidase subunit 7A1, mitochondrial	COX7A1	STARNRFQNRVREKQKLFQEDNDIPLYLKGG	31	23.6121	NaN	NaN	NaN	NaN	NaN	NaN	24.0238	NaN	25.3254	22.5859	NaN	NaN	NaN	K	2	___1	1	1.02705e-29
Q5QNZ2;P24539	Q5QNZ2	ATP synthase F(0) complex subunit B1, mitochondrial	ATP5F1	TQQEKETIAKCIADLKLLAKKAQAQPVM___	183	26.3425	23.8843	NaN	26.4931	26.4342	27.674	NaN	25.8344	24.1584	29.8365	27.4026	21.4726	28.2578	27.814	K	2	___1	1	0.00103292
Q5QNZ2;P24539	Q5QNZ2	ATP synthase F(0) complex subunit B1, mitochondrial	ATP5F1	VVQSISTQQEKETIAKCIADLKLLAKKAQAQ	177	23.9654	NaN	NaN	NaN	NaN	NaN	NaN	25.0096	24.7103	22.4782	21.4069	NaN	20.8361	25.4647	K	2	___1	1	0.000538873
Q5QNZ2;P24539	Q5QNZ2	ATP synthase F(0) complex subunit B1, mitochondrial	ATP5F1	WVEKHVVQSISTQQEKETIAKCIADLKLLAK	172	29.5862	25.6824	26.9727	27.4886	27.9286	28.859	26.6174	30.2652	26.9943	28.5694	27.7496	27.8648	28.5093	28.4084	K	3	___1	1	0
Q5QNZ2;P24539	Q5QNZ2	ATP synthase F(0) complex subunit B1, mitochondrial	ATP5F1	YGPFVADFADKLNEQKLAQLEEAKQASIQHI	70	20.0989	NaN	NaN	21.2563	22.7844	23.0389	22.6718	22.7914	21.9901	NaN	NaN	NaN	22.1293	23.6229	K	2	___1	1	5.09367e-44
Q5QNZ2;P24539	Q5QNZ2	ATP synthase F(0) complex subunit B1, mitochondrial	ATP5F1	KQASIQHIQNAIDTEKSQQALVQKRHYLFDV	93	27.8492	23.9878	23.0156	22.5173	25.4092	24.5071	23.4705	28.5567	23.9921	25.4473	24.18	23.6831	23.5708	24.213	K	3	___1	1	5.73276e-179
Q5QNZ2;P24539	Q5QNZ2	ATP synthase F(0) complex subunit B1, mitochondrial	ATP5F1	QNAIDTEKSQQALVQKRHYLFDVQRNNIAMA	101	29.6109	29.8809	28.9373	28.0892	28.4463	29.7192	27.0988	31.204	26.8514	29.7481	28.5874	28.3444	30.2908	28.5482	K	2	___1	1	6.30466e-15
Q5QNZ2;P24539	Q5QNZ2	ATP synthase F(0) complex subunit B1, mitochondrial	ATP5F1	YGIKKYGPFVADFADKLNEQKLAQLEEAKQA	65	NaN	NaN	21.5922	NaN	22.3688	NaN	NaN	24.1023	NaN	23.6681	23.4865	NaN	22.6476	22.6651	K	2	___1	1	1.33845e-45
P24752;H0YEL7	P24752	Acetyl-CoA acetyltransferase, mitochondrial	ACAT1	LEDLIVKDGLTDVYNKIHMGSCAENTAKKLN	190	24.4047	NaN	NaN	NaN	NaN	NaN	NaN	25.0259	NaN	25.8966	23.4056	NaN	23.2661	22.6884	K	3	___1	1	5.03175e-27
P24752	P24752	Acetyl-CoA acetyltransferase, mitochondrial	ACAT1	VYNKIHMGSCAENTAKKLNIARNEQDAYAIN	202	24.3888	22.4886	21.5287	20.8096	20.5229	NaN	18.4155	25.1515	NaN	22.7454	NaN	25.4919	23.527	22.6884	K	3	___1	1	8.59003e-11
P24752	P24752	Acetyl-CoA acetyltransferase, mitochondrial	ACAT1	VKGQPDVVVKEDEEYKRVDFSKVPKLKTVFQ	257	20.1592	19.7774	NaN	NaN	21.8567	NaN	NaN	21.907	NaN	NaN	NaN	22.1855	NaN	20.3891	K	2	___1	1	0.00205674
P24752	P24752	Acetyl-CoA acetyltransferase, mitochondrial	ACAT1	NDGAAALVLMTADAAKRLNVTPLARIVAFAD	302	25.6631	24.9376	27.192	27.0149	27.6812	27.5643	23.2863	26.2642	25.9082	29.4111	28.3399	25.41	28.0212	27.0858	K	3	___1	1	1.71571e-214
P24752	P24752	Acetyl-CoA acetyltransferase, mitochondrial	ACAT1	AGKFGNEVIPVTVTVKGQPDVVVKEDEEYKR	243	NaN	NaN	NaN	NaN	NaN	NaN	NaN	22.2898	NaN	NaN	NaN	NaN	NaN	NaN	K	3	___1	1	1.44927e-07
P24752	P24752	Acetyl-CoA acetyltransferase, mitochondrial	ACAT1	IPVTVTVKGQPDVVVKEDEEYKRVDFSKVPK	251	23.0923	NaN	NaN	21.1162	23.1893	23.7048	20.4708	23.3435	22.8445	22.4156	22.3079	22.9212	23.4646	24.1233	K	2	___1	1	8.3714e-06
P24752;H0YEL7	P24752	Acetyl-CoA acetyltransferase, mitochondrial	ACAT1	VPYVMNRGSTPYGGVKLEDLIVKDGLTDVYN	174	28.9597	29.288	32.2096	31.9111	30.0426	32.9204	31.9102	31.9979	31.9879	34.4982	32.6491	29.7294	33.0547	32.818	K	2	___1	1	3.3556e-06
P24752;H0YEL7	P24752	Acetyl-CoA acetyltransferase, mitochondrial	ACAT1	GSTPYGGVKLEDLIVKDGLTDVYNKIHMGSC	181	22.0351	NaN	NaN	NaN	23.9854	NaN	NaN	23.3204	22.8489	22.4173	23.1134	23.3965	21.8201	21.7903	K	2	___1	1	1.65597e-41
P24752;H0YEL7;P24752-2;E9PRQ6	P24752	Acetyl-CoA acetyltransferase, mitochondrial	ACAT1	PATKLGSIAIQGAIEKAGIPKEEVKEAYMGN	78	24.7244	27.2445	25.4331	27.6171	28.6232	27.7115	27.3599	26.4669	26.3707	25.0078	28.0298	23.4078	26.0341	27.9492	K	3	___1	1	7.94462e-43
P25705;P25705-2;P25705-3	P25705	ATP synthase subunit alpha, mitochondrial	ATP5A1	VSQHQALLGTIRADGKISEQSDAKLKEIVTN	531	23.7002	NaN	NaN	NaN	NaN	NaN	NaN	20.9238	NaN	NaN	NaN	NaN	NaN	NaN	K	2	___1	1	2.33689e-18
P25705;P25705-2;P25705-3	P25705	ATP synthase subunit alpha, mitochondrial	ATP5A1	GTIRADGKISEQSDAKLKEIVTNFLAGFEA_	539	30.1598	27.3154	28.8645	28.2637	28.9442	29.7404	29.167	30.8529	28.7278	30.5814	29.0554	27.6687	29.7645	29.8227	K	2	___1	1	1.74584e-22
P25705;P25705-2;P25705-3	P25705	ATP synthase subunit alpha, mitochondrial	ATP5A1	SAAQTRAMKQVAGTMKLELAQYREVAAFAQF	434	NaN	20.7343	20.6589	NaN	NaN	NaN	NaN	NaN	22.763	24.5466	NaN	NaN	NaN	23.718	K	2	___1	1	2.68912e-12
P25705;P25705-2;P25705-3;K7EK77;K7ERX7;K7EJP1;K7EQH4	P25705	ATP synthase subunit alpha, mitochondrial	ATP5A1	VVFGNDKLIKEGDIVKRTGAIVDVPVGEELL	132	26.3498	NaN	NaN	NaN	NaN	NaN	NaN	27.907	NaN	NaN	NaN	NaN	NaN	NaN	K	2	___1	1	0.00805325
P25705;P25705-2;P25705-3;K7EK77;K7ENJ4	P25705	ATP synthase subunit alpha, mitochondrial	ATP5A1	DTIINQKRFNDGSDEKKKLYCIYVAIGQKRS	239	27.5336	25.075	25.5634	24.1809	24.6895	25.6473	25.7705	27.8392	23.1355	26.2399	24.472	24.1037	25.5887	25.8814	K	3	___1	1	3.94484e-20
P25705;P25705-2;P25705-3;K7EK77;K7ENJ4	P25705	ATP synthase subunit alpha, mitochondrial	ATP5A1	TIINQKRFNDGSDEKKKLYCIYVAIGQKRST	240	NaN	20.67	NaN	NaN	NaN	NaN	NaN	21.2118	NaN	NaN	NaN	NaN	NaN	21.9165	K	2	___1	0.959329	0.00229094
P25705;P25705-2;P25705-3;K7EK77;K7ERX7;K7EJP1;K7EQH4	P25705	ATP synthase subunit alpha, mitochondrial	ATP5A1	NLEPDNVGVVVFGNDKLIKEGDIVKRTGAIV	123	NaN	NaN	21.3433	NaN	23.3094	NaN	NaN	24.2636	NaN	25.5183	25.6632	NaN	24.1227	24.0561	K	3	___1	1	9.25428e-50
P25705;P25705-2;P25705-3	P25705	ATP synthase subunit alpha, mitochondrial	ATP5A1	EQVAVIYAGVRGYLDKLEPSKITKFENAFLS	498	22.6345	NaN	NaN	NaN	NaN	NaN	NaN	23.394	24.7729	NaN	21.2651	NaN	NaN	23.6208	K	2	___1	1	0.00322375
P25705;P25705-2;P25705-3	P25705	ATP synthase subunit alpha, mitochondrial	ATP5A1	GVRGYLDKLEPSKITKFENAFLSHVVSQHQA	506	NaN	NaN	NaN	NaN	NaN	NaN	NaN	NaN	NaN	NaN	22.9324	NaN	NaN	NaN	K	4	___1	1	4.22775e-05
P25705;P25705-2;P25705-3;K7ENJ4	P25705	ATP synthase subunit alpha, mitochondrial	ATP5A1	YVAIGQKRSTVAQLVKRLTDADAMKYTIVVS	261	25.0119	27.7655	26.6777	NaN	26.4091	26.1348	26.8411	26.8506	24.7718	28.0051	26.2397	26.3467	26.6351	26.9318	K	2	___1	1	0.00207208
P25705;P25705-2;P25705-3;K7EK77;K7ENJ4	P25705	ATP synthase subunit alpha, mitochondrial	ATP5A1	QTGKTSIAIDTIINQKRFNDGSDEKKKLYCI	230	24.9571	22.3999	28.1538	28.3944	28.8963	29.1771	28.4754	27.0498	26.5884	30.4818	28.6993	21.8243	28.6302	29.0697	K	2	___1	1	6.48818e-146
P25705;P25705-2;K7EK77;K7ENJ4;K7ERX7;K7EJP1	P25705	ATP synthase subunit alpha, mitochondrial	ATP5A1	LLGRVVDALGNAIDGKGPIGSKTRRRVGLKA	161	NaN	NaN	NaN	NaN	NaN	20.5053	NaN	NaN	22.96	NaN	NaN	NaN	NaN	NaN	K	3	___1	1	5.05891e-16
P26038;V9GZ54	P26038	Moesin	MSN	KVTAQDVRKESPLLFKFRAKFYPEDVSEELI	79	20.5513	NaN	22.5513	22.866	22.8634	NaN	NaN	22.8196	NaN	NaN	23.5392	NaN	23.0397	22.4165	K	2	___1	1	0.00300759
P26447	P26447	Protein S100-A4	S100A4	ELKELLTRELPSFLGKRTDEAAFQKLMSNLD	48	22.8184	NaN	NaN	NaN	NaN	NaN	NaN	22.8048	NaN	22.1484	22.5708	NaN	23.0003	NaN	K	2	___1	1	0.00483931
P26641;P26641-2	P26641	Elongation factor 1-gamma	EEF1G	LGEVKLCEKMAQFDAKKFAETQPKKDTPRKE	219	NaN	NaN	NaN	NaN	NaN	NaN	NaN	20.2915	NaN	NaN	NaN	NaN	NaN	NaN	K	2	___1	1	0.00310166
P26641;P26641-2	P26641	Elongation factor 1-gamma	EEF1G	PFAHLPKSTFVLDEFKRKYSNEDTLSVALPY	294	22.0496	NaN	22.6233	23.7501	24.0977	23.2904	22.9529	22.3322	NaN	22.9314	23.7623	NaN	23.2087	23.6099	K	2	___1	1	6.53954e-07
P26678	P26678	Cardiac phospholamban	PLN	_____________MEKVQYLTRSAIRRASTI	3	NaN	NaN	NaN	NaN	21.5327	NaN	NaN	NaN	NaN	NaN	NaN	NaN	NaN	NaN	K	2	___1	1	0.0060181
P27797;K7EJB9	P27797	Calreticulin	CALR	SKHKSDFGKFVLSSGKFYGDEEKDKGLQTSQ	55	NaN	NaN	NaN	NaN	NaN	NaN	NaN	20.5891	NaN	NaN	NaN	NaN	NaN	NaN	K	2	___1	1	0.00556237
P27797;K7EJB9	P27797	Calreticulin	CALR	WTSRWIESKHKSDFGKFVLSSGKFYGDEEKD	48	NaN	NaN	NaN	NaN	NaN	NaN	NaN	23.2616	NaN	NaN	NaN	NaN	NaN	NaN	K	2	___1	1	0.00127548
P27824;P27824-2;P27824-3;D6RFL1;H0Y9H1;D6RGY2	P27824	Calnexin	CANX	FIFRHKNPKTGIYEEKHAKRPDADLKTYFTD	217	NaN	NaN	NaN	20.0654	NaN	NaN	NaN	21.8498	NaN	NaN	NaN	NaN	NaN	NaN	K	3	___1	1	0.000833853
P28331;P28331-2;P28331-4;B4DJ81;P28331-3;P28331-5	P28331	NADH-ubiquinone oxidoreductase 75 kDa subunit, mitochondrial	NDUFS1	NDRSRFLEGKRAVEDKNIGPLVKTIMTRCIQ	163	NaN	NaN	NaN	21.2624	NaN	21.9799	20.7461	21.0026	22.4683	NaN	21.4008	NaN	21.5513	23.0429	K	2	___1	1	3.89886e-05
P28331;P28331-2;P28331-4;B4DJ81;P28331-3;P28331-5	P28331	NADH-ubiquinone oxidoreductase 75 kDa subunit, mitochondrial	NDUFS1	LQDIASGSHPFSQVLKEAKKPMVVLGSSALQ	467	28.1738	NaN	25.5796	25.552	27.8909	27.708	24.8022	28.9319	25.1462	28.898	28.1748	26.972	27.7634	27.5289	K	3	___1	1	4.43588e-228
P28331;P28331-2;P28331-4;C9JPQ5;F8WDL5	P28331	NADH-ubiquinone oxidoreductase 75 kDa subunit, mitochondrial	NDUFS1	LSVAGNCRMCLVEIEKAPKVVAACAMPVMKG	84	23.3462	NaN	NaN	NaN	NaN	NaN	NaN	23.9393	22.581	23.423	NaN	NaN	23.3977	NaN	K	2	___1	1	4.79794e-05
P28838-2;P28838;H0Y983	P28838-2	Cytosol aminopeptidase	LAP3	AGKLRETLNISGPPLKAGKTRTFYGLHQDFP	48	20.4196	20.2043	20.8185	21.6132	21.2437	21.9247	NaN	21.6549	21.7294	22.4976	21.9642	21.963	22.4506	NaN	K	2	___1	1	3.50799e-11
P28838-2;P28838;H0Y9Q1	P28838-2	Cytosol aminopeptidase	LAP3	PANEMTPTRFAEIIEKNLKSASSKTEVHIRP	190	22.4382	NaN	NaN	NaN	NaN	NaN	NaN	23.8243	NaN	23.7158	NaN	NaN	NaN	NaN	K	2	___1	1	0.0022091
P30038;P30038-2;P30038-3;Q5TF55	P30038	Delta-1-pyrroline-5-carboxylate dehydrogenase, mitochondrial	ALDH4A1	AADMLSGPRRAEILAKTMVGQGKTVIQAEID	146	NaN	22.0905	NaN	NaN	NaN	NaN	21.4642	NaN	20.2622	NaN	20.7799	21.9907	22.2454	21.6606	K	2	___1	1	1.51362e-11
P30038;P30038-2;P30038-3;Q5TF55	P30038	Delta-1-pyrroline-5-carboxylate dehydrogenase, mitochondrial	ALDH4A1	EWDLKPIADRAQIFLKAADMLSGPRRAEILA	130	NaN	NaN	NaN	24.7687	25.7626	26.2163	24.748	20.9209	22.3861	24.7415	24.7813	23.9988	26.2308	24.5793	K	2	___1	1	6.55142e-06
P30038;P30038-2;P30038-3	P30038	Delta-1-pyrroline-5-carboxylate dehydrogenase, mitochondrial	ALDH4A1	GQQPFGGARASGTNDKPGGPHYILRWTSPQV	531	NaN	NaN	NaN	NaN	22.2863	NaN	NaN	NaN	NaN	NaN	21.035	21.8578	NaN	21.4318	K	3	___1	1	7.59511e-05
P30038;P30038-2;P30038-3	P30038	Delta-1-pyrroline-5-carboxylate dehydrogenase, mitochondrial	ALDH4A1	GAVFSQDKDVVQEATKVLRNAAGNFYINDKS	495	NaN	NaN	NaN	NaN	NaN	NaN	NaN	NaN	22.6374	NaN	NaN	23.2124	22.873	22.6477	K	2	___1	1	0.000147295
P30038;P30038-2;P30038-3	P30038	Delta-1-pyrroline-5-carboxylate dehydrogenase, mitochondrial	ALDH4A1	PFNHGHKVAKFCYADKSLLNKAIEAALAARK	99	23.5316	22.5805	NaN	22.1304	24.0313	23.6696	22.8873	24.4146	21.5087	24.2814	24.3949	25.6154	25.4459	26.1085	K	2	___1	1	1.34399e-06
P30038;P30038-2;P30038-3;Q5TF55	P30038	Delta-1-pyrroline-5-carboxylate dehydrogenase, mitochondrial	ALDH4A1	IDAAAELIDFFRFNAKYAVELEGQQPISVPP	175	NaN	NaN	NaN	NaN	24.2872	24.7008	22.5651	21.1469	NaN	24.619	24.6886	24.3361	26.529	25.8894	K	3	___1	1	6.73803e-68
P30038;P30038-2;P30038-3	P30038	Delta-1-pyrroline-5-carboxylate dehydrogenase, mitochondrial	ALDH4A1	VQYQVSPFNHGHKVAKFCYADKSLLNKAIEA	93	29.7981	23.8254	27.7875	28.8324	29.6843	30.0474	28.3621	30.1877	29.4457	30.5678	30.2959	27.9358	31.476	30.8389	K	2	___1	1	8.47881e-06
P30041	P30041	Peroxiredoxin-6	PRDX6	RDFTPVCTTELGRAAKLAPEFAKRNVKLIAL	56	27.8277	NaN	27.7262	28.2876	28.1757	28.5341	28.3459	28.2273	26.5988	27.2801	27.9262	24.4462	28.2173	28.3461	K	2	___1	1	0.00411235
P30041	P30041	Peroxiredoxin-6	PRDX6	LAILLGMLDPAEKDEKGMPVTARVVFVFGPD	125	23.8014	21.1761	21.9731	22.7201	20.8424	21.5707	22.0123	24.2768	21.1421	20.2769	22.4221	21.5267	22.4138	22.2154	K	2	___1	1	0.000937609
P30041	P30041	Peroxiredoxin-6	PRDX6	NRELAILLGMLDPAEKDEKGMPVTARVVFVF	122	20.0007	NaN	NaN	NaN	NaN	NaN	NaN	20.8316	NaN	NaN	NaN	NaN	NaN	NaN	K	3	___1	1	2.18363e-06
P30041	P30041	Peroxiredoxin-6	PRDX6	VTARVVFVFGPDKKLKLSILYPATTGRNFDE	144	23.948	NaN	24.9341	26.2824	24.8403	25.8133	24.849	24.9011	NaN	NaN	25.6479	25.4986	25.9596	25.523	K	2	___1	1	6.4363e-20
P30041	P30041	Peroxiredoxin-6	PRDX6	GMPVTARVVFVFGPDKKLKLSILYPATTGRN	141	25.1493	NaN	26.0475	27.1122	26.615	26.1244	25.4468	26.4178	NaN	25.924	27.5956	27.4062	27.0565	26.9564	K	2	___1	1	0.00208309
P30044-2;P30044;P30044-3	P30044-2	Peroxiredoxin-5, mitochondrial	PRDX5	FEGEPGNKVNLAELFKGKKGVLFGVPGAFTP	31	25.3107	NaN	25.6887	24.8622	26.6288	25.5582	25.0007	24.8642	NaN	28.1556	26.8882	25.9196	26.5558	26.4467	K	2	___1	1	0.00020877
P30046;B5MC82;P30046-2;A6NHG4;J3KQ18	P30046	D-dopachrome decarboxylase;D-dopachrome decarboxylase-like protein	DDT;DDTL	LDTNLPANRVPAGLEKRLCAAAASILGKPAD	21	25.0144	NaN	NaN	NaN	NaN	25.3001	NaN	24.7173	NaN	NaN	24.6295	24.8568	25.487	25.4002	K	2	___1	1	0.00834971
P30048-2;P30048	P30048-2	Thioredoxin-dependent peroxide reductase, mitochondrial	PRDX3	AVVNGEFKDLSLDDFKGKYLVLFFYPLDFTF	73	27.8437	26.158	26.4278	26.5628	27.6446	27.2149	26.2974	28.913	28.5268	29.2662	27.4394	27.7311	28.1129	28.1283	K	2	___1	1	0.00100988
P30048-2;P30048	P30048-2	Thioredoxin-dependent peroxide reductase, mitochondrial	PRDX3	QAPYFKGTAVVNGEFKDLSLDDFKGKYLVLF	65	24.1689	24.5079	24.1085	NaN	26.1308	24.8723	NaN	26.1943	24.3386	28.4917	26.2361	26.3128	25.9004	25.873	K	3	___1	1	2.58672e-94
P30049	P30049	ATP synthase subunit delta, mitochondrial	ATP5D	TLDMLDLGAAKANLEKAQAELVGTADEATRA	136	30.0532	26.7136	29.077	28.9175	32.6593	30.7807	30.351	28.2001	30.0307	31.3593	29.8217	29.6146	30.0813	30.8841	K	3	___1	1	0
P30049	P30049	ATP synthase subunit delta, mitochondrial	ATP5D	RAEIQIRIEANEALVKALE____________	165	26.3244	26.2306	27.4397	NaN	23.7497	26.7704	NaN	26.7779	28.2847	28.5703	27.2754	28.202	28.7148	28.2182	K	2	___1	1	5.33861e-12
P30084	P30084	Enoyl-CoA hydratase, mitochondrial	ECHS1	FATDDRKEGMTAFVEKRKANFKDQ_______	282	NaN	NaN	23.5956	23.6509	25.6927	24.9325	23.6799	25.0542	22.0821	NaN	22.7887	23.7712	23.131	23.7176	K	2	___1	1	0.000272728
P30084	P30084	Enoyl-CoA hydratase, mitochondrial	ECHS1	IKEMQNLSFQDCYSSKFLKHWDHLTQVKKPV	115	21.2992	NaN	NaN	NaN	NaN	NaN	NaN	23.8235	NaN	26.2983	24.1876	NaN	24.1114	23.2992	K	3	___1	1	1.50869e-136
P30153;B3KQV6;C9J9C1;P30154-4;P30154;P30154-2;P30154-3	P30153	Serine/threonine-protein phosphatase 2A 65 kDa regulatory subunit A alpha isoform;Serine/threonine-protein phosphatase 2A 65 kDa regulatory subunit A beta isoform	PPP2R1A;PPP2R1B	LCSDDTPMVRRAAASKLGEFAKVLELDNVKS	188	NaN	NaN	NaN	22.7027	NaN	NaN	NaN	NaN	NaN	NaN	21.1294	21.7832	20.73	NaN	K	2	___1	1	0.00371716
P30405;H0Y548;R4GN99;P30405-2	P30405	Peptidyl-prolyl cis-trans isomerase F, mitochondrial;Peptidyl-prolyl cis-trans isomerase	PPIF	VPKTAENFRALCTGEKGFGYKGSTFHRVIPS	86	26.5965	NaN	23.6531	23.5	24.5407	25.5454	22.5743	27.0255	24.6224	26.2275	25.3726	24.7348	26.1481	25.849	K	2	___1	1	1.5394e-06
P30405;H0Y548;R4GN99;P30405-2	P30405	Peptidyl-prolyl cis-trans isomerase F, mitochondrial;Peptidyl-prolyl cis-trans isomerase	PPIF	VDANGKPLGRVVLELKADVVPKTAENFRALC	67	24.5704	24.0059	26.451	27.0618	28.0132	28.4567	27.2539	25.7399	26.3223	29.5663	28.503	25.7063	28.2858	26.5096	K	2	___1	1	3.14316e-10
P30837	P30837	Aldehyde dehydrogenase X, mitochondrial	ALDH1B1	RIAKEEIFGPVQPLFKFKKIEEVVERANNTR	426	21.3785	NaN	NaN	NaN	NaN	NaN	NaN	22.4233	NaN	22.7389	NaN	NaN	NaN	21.3897	K	2	___1	1	1.60962e-06
P30837	P30837	Aldehyde dehydrogenase X, mitochondrial	ALDH1B1	GNPFELDTQQGPQVDKEQFERVLGYIQLGQK	364	NaN	NaN	NaN	NaN	NaN	NaN	NaN	20.8841	NaN	NaN	NaN	NaN	NaN	NaN	K	3	___1	1	1.64709e-13
P31040-2;P31040;D6RFM5	P31040-2	Succinate dehydrogenase [ubiquinone] flavoprotein subunit, mitochondrial	SDHA	EDGKIYQRAFGGQSLKFGKGGQAHRCCCVAD	131	26.0931	NaN	26.1758	26.7213	27.8676	27.9664	26.7136	27.4951	24.3005	27.944	27.1772	22.9223	27.2202	27.7607	K	2	___1	1	1.96617e-07
P31040-2;P31040;A0A087X1I3;P31040-3	P31040-2	Succinate dehydrogenase [ubiquinone] flavoprotein subunit, mitochondrial	SDHA	FRVGSVLQEGCGKISKLYGDLKHLKTFDRGM	493	28.4774	27.0977	24.7268	26.4739	28.1073	27.7335	27.3926	29.0734	27.5283	27.5505	27.7533	28.137	28.0397	28.6338	K	3	___1	1	0.000395605
P31040-2;P31040;A0A087X1I3;P31040-3	P31040-2	Succinate dehydrogenase [ubiquinone] flavoprotein subunit, mitochondrial	SDHA	LQEGCGKISKLYGDLKHLKTFDRGMVWNTDL	499	30.2277	25.2777	25.7491	25.2302	27.2022	27.1111	26.163	30.7177	23.3928	30.0414	27.3972	24.6582	27.7203	28.0262	K	3	___1	1	0.000595313
P31040-2;P31040;A0A087X1I3;P31040-3	P31040-2	Succinate dehydrogenase [ubiquinone] flavoprotein subunit, mitochondrial	SDHA	ADGSIRTSELRLSMQKSMQNHAAVFRVGSVL	469	NaN	19.7169	19.1836	NaN	22.1971	20.65	NaN	NaN	NaN	NaN	NaN	NaN	NaN	NaN	K	3	___1	1	0.00146738
P31040-2;P31040;A0A087X1I3;P31040-3;D6RFM5;H0Y8X1	P31040-2	Succinate dehydrogenase [ubiquinone] flavoprotein subunit, mitochondrial	SDHA	PIKPNAGEESVMNLDKLRFADGSIRTSELRL	450	24.3012	NaN	NaN	20.7685	24.7083	20.4708	NaN	25.7815	NaN	24.1491	22.5946	23.0484	23.0164	23.7097	K	3	___1	1	3.53908e-19
P31040-2;P31040;A0A087X1I3;P31040-3	P31040-2	Succinate dehydrogenase [ubiquinone] flavoprotein subunit, mitochondrial	SDHA	AAVFRVGSVLQEGCGKISKLYGDLKHLKTFD	490	NaN	NaN	NaN	NaN	20.9877	NaN	NaN	21.9775	23.2356	21.0111	21.6116	NaN	21.8488	23.9217	K	2	___1	1	3.5772e-21
P31040-2;P31040;A0A087X1I3;P31040-3;D6RFM5	P31040-2	Succinate dehydrogenase [ubiquinone] flavoprotein subunit, mitochondrial	SDHA	VGTGKVTLEYRPVIDKTLNEADCATVPPAIR	599	22.0299	NaN	NaN	NaN	NaN	NaN	NaN	21.8317	NaN	NaN	NaN	NaN	NaN	NaN	K	3	___1	1	3.52251e-31
P31415	P31415	Calsequestrin-1	CASQ1	VLEDKGVGFGLVDSEKDAAVAKKLGLTEVDS	113	26.2453	26.1654	22.7488	27.1491	26.5358	25.7577	25.0689	26.5107	26.4441	26.082	26.24	27.4799	26.1313	27.3332	K	2	___1	1	1.82033e-15
P31415	P31415	Calsequestrin-1	CASQ1	FPEYDGVDRVINVNAKNYKNVFKKYEVLALL	55	24.3345	23.8795	22.9294	24.34	22.0648	23.3235	20.4237	24.284	23.4564	22.4937	23.3448	25.2646	23.498	24.5416	K	2	___1	1	3.76165e-05
P31930	P31930	Cytochrome b-c1 complex subunit 1, mitochondrial	UQCRC1	KLSRADLTEYLSTHYKAPRMVLAAAGGVEHQ	225	25.7057	NaN	NaN	21.7678	22.6047	23.414	NaN	25.4755	NaN	24.5243	22.1158	NaN	22.5214	22.1114	K	3	___1	1	3.28694e-19
P31930	P31930	Cytochrome b-c1 complex subunit 1, mitochondrial	UQCRC1	GDIVQNCSLEDSQIEKERDVILREMQENDAS	163	24.9462	NaN	NaN	NaN	NaN	NaN	NaN	26.424	NaN	25.9503	23.4604	23.7009	24.1308	23.4202	K	3	___1	1	1.41474e-177
P31930	P31930	Cytochrome b-c1 complex subunit 1, mitochondrial	UQCRC1	HLNAYSTREHTAYYIKALSKDLPKAVELLGD	134	NaN	NaN	NaN	NaN	NaN	NaN	NaN	22.6478	NaN	NaN	NaN	NaN	NaN	NaN	K	3	___1	1	0.000949352
P31930	P31930	Cytochrome b-c1 complex subunit 1, mitochondrial	UQCRC1	EKNNGAGYFLEHLAFKGTKNRPGSALEKEVE	99	23.6773	NaN	NaN	NaN	NaN	NaN	NaN	24.6107	NaN	NaN	NaN	NaN	NaN	NaN	K	3	___1	1	3.40334e-07
P31930	P31930	Cytochrome b-c1 complex subunit 1, mitochondrial	UQCRC1	LAFKGTKNRPGSALEKEVESMGAHLNAYSTR	111	24.9686	NaN	NaN	NaN	NaN	NaN	NaN	26.2528	NaN	NaN	NaN	NaN	NaN	NaN	K	3	___1	1	3.4576e-57
P31937	P31937	3-hydroxyisobutyrate dehydrogenase, mitochondrial	HIBADH	DAGEQVVSSPADVAEKADRIITMLPTSINAI	95	24.1381	23.0168	22.4465	NaN	24.6815	24.0035	22.1028	26.7406	22.6674	25.8299	24.0058	23.1806	24.3691	24.2431	K	3	___1	1	1.08427e-142
P31937;H7BZL2	P31937	3-hydroxyisobutyrate dehydrogenase, mitochondrial	HIBADH	TIDPAVSKELAKEVEKMGAVFMDAPVSGGVG	149	25.8428	25.4989	26.3447	25.7811	26.9451	27.2202	26.1848	27.2508	26.2483	28.194	26.9139	26.118	27.5936	26.6514	K	2	___1	1	2.38787e-39
P31937;H7BZL2	P31937	3-hydroxyisobutyrate dehydrogenase, mitochondrial	HIBADH	SINAIEAYSGANGILKKVKKGSLLIDSSTID	121	24.2007	NaN	24.7425	25.0804	NaN	25.0889	22.107	23.6221	NaN	27.8675	27.8104	24.2526	23.8663	24.7412	K	3	___1	1	9.96816e-74
P31937	P31937	3-hydroxyisobutyrate dehydrogenase, mitochondrial	HIBADH	AAGSFAAVCSRSVASKTPVGFIGLGNMGNPM	39	22.9068	23.4279	25.8156	24.8339	25.2585	26.4502	24.5142	25.3283	NaN	27.9029	24.3878	25.2855	26.9179	25.7669	K	3	___1	1	9.48309e-41
P31939;P31939-2	P31939	Bifunctional purine biosynthesis protein PURH;Phosphoribosylaminoimidazolecarboxamide formyltransferase;IMP cyclohydrolase	ATIC	IIAPGYEEEALTILSKKKNGNYCVLQMDQSY	356	20.9956	NaN	NaN	NaN	NaN	NaN	NaN	20.8196	NaN	NaN	NaN	NaN	NaN	NaN	K	3	___1	1	1.08094e-08
P31948;P31948-3;P31948-2	P31948	Stress-induced-phosphoprotein 1	STIP1	RQIAKAYARIGNSYFKEEKYKDAIHFYNKSL	312	NaN	NaN	21.6046	21.9676	21.2778	21.7024	21.5685	21.6988	NaN	21.791	22.2089	NaN	21.7591	21.7435	K	2	___1	1	4.03646e-05
P31948;P31948-3;P31948-2	P31948	Stress-induced-phosphoprotein 1	STIP1	QERLAYINPDLALEEKNKGNECFQKGDYPQA	364	NaN	NaN	NaN	NaN	NaN	NaN	NaN	21.0838	NaN	NaN	NaN	NaN	NaN	NaN	K	3	___1	1	3.05324e-05
P31948;P31948-3;P31948-2	P31948	Stress-induced-phosphoprotein 1	STIP1	PQALSEHLKNPVIAQKIQKLMDVGLIAIR__	530	NaN	21.7871	NaN	20.7258	20.9777	NaN	NaN	NaN	NaN	NaN	21.5027	22.3056	21.3041	21.5385	K	2	___1	1	0.00448499
P32119;A6NIW5;P32119-2	P32119	Peroxiredoxin-2	PRDX2	PAPDFKATAVVDGAFKEVKLSDYKGKYVVLF	26	24.6365	22.2132	25.315	25.6337	25.6203	26.3176	25.7931	24.9465	25.5337	25.3015	25.4529	23.2795	25.9346	24.2935	K	2	___1	1	4.0337e-15
P32119;A6NIW5;P32119-2	P32119	Peroxiredoxin-2	PRDX2	DFKATAVVDGAFKEVKLSDYKGKYVVLFFYP	29	26.8578	24.1297	24.2072	24.0464	24.1086	24.5972	NaN	25.6555	23.911	23.6738	24.0707	24.1502	24.3923	24.0177	K	2	___1	1	0.00559183
P32119	P32119	Peroxiredoxin-2	PRDX2	LADVTRRLSEDYGVLKTDEGIAYRGLFIIDG	119	20.7765	NaN	NaN	NaN	NaN	NaN	NaN	20.3623	NaN	NaN	NaN	NaN	NaN	NaN	K	2	___1	1	1.14326e-06
P32298-3;P32298-4;P32298-2;P32298	P32298-3	G protein-coupled receptor kinase 4	GRK4	KRIKKRKGEAMALNEKRILEKVQSRFVVSLA	204	NaN	NaN	NaN	NaN	NaN	NaN	NaN	NaN	NaN	23.224	NaN	NaN	NaN	23.4478	K	2	___1	1	0.00610027
P34897-3;P34897-2;P34897;H0YIZ0;G3V2Y4	P34897-3	Serine hydroxymethyltransferase, mitochondrial;Serine hydroxymethyltransferase	SHMT2	QACTPMFREYSLQVLKNARAMADALLERGYS	335	NaN	NaN	NaN	NaN	NaN	NaN	NaN	20.8832	NaN	NaN	NaN	NaN	NaN	NaN	K	2	___1	1	0.00546055
P34897-3;P34897-2;P34897	P34897-3	Serine hydroxymethyltransferase, mitochondrial	SHMT2	IGLEVKSKTAKLQDFKSFLLKDSETSQRLAN	448	NaN	NaN	22.8256	21.5745	NaN	23.4769	NaN	NaN	NaN	25.6092	23.7337	NaN	22.6624	21.2008	K	2	___1	1	0.0016735
P34897-3;P34897-2;P34897	P34897-3	Serine hydroxymethyltransferase, mitochondrial	SHMT2	DEGVNIGLEVKSKTAKLQDFKSFLLKDSETS	443	NaN	NaN	23.1035	NaN	NaN	22.8907	20.8006	23.2035	20.6192	23.9365	23.4098	NaN	22.7048	22.3795	K	2	___1	1	0.00400932
P34897-3;P34897-2;P34897;G3V5L0;G3V241;G3V3Y8;G3V4T0;G3V4X0;G3V2W0;G3V2E4;G3V540;G3V4W5	P34897-3	Serine hydroxymethyltransferase, mitochondrial	SHMT2	LGSCLNNKYSEGYPGKRYYGGAEVVDEIELL	82	21.2691	NaN	NaN	NaN	NaN	20.9072	NaN	22.9077	NaN	NaN	NaN	NaN	NaN	NaN	K	2	___1	1	0.00367361
P35232;C9JW96;E9PCW0	P35232	Prohibitin	PHB	QVAQQEAERARFVVEKAEQQKKAAIISAEGD	202	24.0815	21.9456	22.74	22.8794	23.0918	23.6361	23.9506	24.6189	NaN	22.6088	23.0791	NaN	24.1226	24.377	K	2	___1	1	6.62495e-05
P35270	P35270	Sepiapterin reductase	SPR	VDCKVSAQKLLSLLEKDEFKSGAHVDFYDK_	247	25.2467	NaN	24.0667	25.1721	25.3796	25.4009	24.9908	26.15	NaN	26.8152	25.8526	21.0618	25.3237	24.8671	K	2	___1	1	1.79683e-06
P35270	P35270	Sepiapterin reductase	SPR	KGLQELKAKGKLVDCKVSAQKLLSLLEKDEF	235	NaN	NaN	NaN	NaN	NaN	NaN	NaN	22.6905	20.1977	21.0672	22.2259	21.0035	21.2862	21.0867	K	2	___1	1	0.00317769
P35270	P35270	Sepiapterin reductase	SPR	LKAKGKLVDCKVSAQKLLSLLEKDEFKSGAH	240	22.2871	NaN	NaN	NaN	NaN	NaN	NaN	23.2693	NaN	23.2077	22.5314	NaN	21.7114	NaN	K	2	___1	1	0.000188688
P35573;P35573-2;P35573-3	P35573	Glycogen debranching enzyme;4-alpha-glucanotransferase;Amylo-alpha-1,6-glucosidase	AGL	EDPSDLNEKHPNLVHKRGIYKDSYGASSPWC	1358	NaN	NaN	NaN	NaN	NaN	NaN	NaN	23.0167	NaN	NaN	NaN	NaN	NaN	NaN	K	3	___1	1	0.00745242
P35573;P35573-2;P35573-3	P35573	Glycogen debranching enzyme;4-alpha-glucanotransferase;Amylo-alpha-1,6-glucosidase	AGL	VSYDEWNRKIQDNFEKLFHVSEDPSDLNEKH	1337	NaN	NaN	NaN	NaN	NaN	NaN	NaN	21.2563	NaN	NaN	NaN	NaN	NaN	NaN	K	3	___1	1	2.41113e-06
P35573;P35573-2;P35573-3	P35573	Glycogen debranching enzyme;4-alpha-glucanotransferase;Amylo-alpha-1,6-glucosidase	AGL	EKLFHVSEDPSDLNEKHPNLVHKRGIYKDSY	1351	21.1866	NaN	NaN	NaN	NaN	NaN	NaN	23.0882	NaN	NaN	NaN	NaN	NaN	NaN	K	5	___1	1	2.04153e-15
P35573;P35573-2;P35573-3	P35573	Glycogen debranching enzyme;4-alpha-glucanotransferase;Amylo-alpha-1,6-glucosidase	AGL	CCNWFHKRMEELNSEKHRLINYHQEQAVNCL	385	NaN	NaN	NaN	NaN	NaN	NaN	NaN	21.7048	NaN	NaN	NaN	NaN	NaN	NaN	K	3	___1	1	6.83e-05
P35573;P35573-2;P35573-3	P35573	Glycogen debranching enzyme;4-alpha-glucanotransferase;Amylo-alpha-1,6-glucosidase	AGL	ELSKKNIFPYHEVTVKRHGKAIKVSYDEWNR	1314	23.7853	NaN	NaN	NaN	NaN	NaN	NaN	24.3717	NaN	NaN	NaN	NaN	NaN	NaN	K	3	___1	1	0.000329811
P35573;P35573-2;P35573-3	P35573	Glycogen debranching enzyme;4-alpha-glucanotransferase;Amylo-alpha-1,6-glucosidase	AGL	HQSVVAVSRTAFRNPKTSFYSKEVPQMCIPG	755	23.497	NaN	23.0274	23.8988	22.667	23.2277	22.2368	24.7049	21.1547	22.1459	23.1329	22.2998	22.8774	23.0884	K	2	___1	1	0.00197
P35573;P35573-2;P35573-3	P35573	Glycogen debranching enzyme;4-alpha-glucanotransferase;Amylo-alpha-1,6-glucosidase	AGL	FKSGSLAVDNADPILKIPFASLASRLTLAEL	889	NaN	NaN	NaN	NaN	NaN	NaN	NaN	20.8133	NaN	NaN	NaN	NaN	NaN	NaN	K	3	___1	1	2.86999e-12
P35579;P35579-2	P35579	Myosin-9	MYH9	NFVRCIIPNHEKKAGKLDPHLVLDQLRCNGV	682	21.9029	NaN	NaN	NaN	NaN	NaN	NaN	23.1106	NaN	NaN	NaN	NaN	NaN	NaN	K	3	___1	1	9.80996e-05
P35579;P35579-2	P35579	Myosin-9	MYH9	LVDLDHQRQSACNLEKKQKKFDQLLAEEKTI	1441	NaN	NaN	NaN	NaN	NaN	NaN	NaN	23.5055	NaN	NaN	20.1426	19.5399	20.7134	NaN	K	2	___1	1	0.00209791
P35579;P35579-2	P35579	Myosin-9	MYH9	MSSKDDVGKSVHELEKSKRALEQQVEEMKTQ	1525	21.7964	NaN	NaN	NaN	NaN	NaN	NaN	21.7169	NaN	NaN	NaN	NaN	NaN	NaN	K	2	___1	1	0.00249543
P35609;P35609-2	P35609	Alpha-actinin-2	ACTN2	DDPIGNINLAMEIAEKHLDIPKMLDAEDIVN	221	22.7484	NaN	NaN	NaN	NaN	NaN	NaN	22.0893	NaN	NaN	NaN	NaN	NaN	NaN	K	3	___1	1	8.12157e-14
P35609;P35609-2;F6THM6	P35609	Alpha-actinin-2	ACTN2	ELRRELPPDQAQYCIKRMPAYSGPGSVPGAL	864	22.0984	21.0995	21.7086	21.2488	NaN	21.0423	NaN	22.1284	22.7153	22.1426	23.1285	21.137	23.1085	23.6248	K	2	___1	1	3.11225e-05
P35609;P35609-2;Q08043;A0A087WSZ2	P35609;Q08043	Alpha-actinin-2;Alpha-actinin-3	ACTN2;ACTN3	GERLPKPDRGKMRFHKIANVNKALDYIASKG;GERLPRPDKGKMRFHKIANVNKALDFIASKG	96	NaN	NaN	NaN	19.8588	NaN	NaN	NaN	NaN	20.5108	NaN	NaN	19.7536	19.0653	21.1247	K	2	___1	1	0.00271641
P35609;P35609-2	P35609	Alpha-actinin-2	ACTN2	CALIHRHRPDLIDYSKLNKDDPIGNINLAME	202	24.8783	NaN	NaN	NaN	NaN	NaN	NaN	24.6889	NaN	NaN	NaN	NaN	NaN	NaN	K	3	___1	1	0.00153635
P35609;P35609-2;F6THM6	P35609	Alpha-actinin-2	ACTN2	TAEQVIASFRILASDKPYILAEELRRELPPD	842	24.9322	NaN	NaN	24.2022	24.6703	23.0847	23.4059	24.8787	NaN	24.2554	25.3027	22.9857	24.849	23.9802	K	2	___1	1	2.37485e-43
P35609;P35609-2;F6THM6	P35609	Alpha-actinin-2	ACTN2	LNEIRRLERLEHLAEKFRQKASTHETWAYGK	405	24.7322	23.8229	24.1179	24.3506	25.0427	25.1339	24.905	28.1343	21.221	25.2998	24.7677	23.8214	25.0766	25.0711	K	3	___1	1	5.55269e-05
P35609;P35609-2;F6THM6	P35609	Alpha-actinin-2	ACTN2	QKICDQWDRLGTLTQKRREALERMEKLLETI	499	27.6146	22.6611	27.4662	27.8415	27.9021	28.721	27.8241	28.2335	26.0456	27.2602	27.7499	26.5447	27.9529	27.1099	K	2	___1	1	3.56164e-06
P35609;P35609-2;F6THM6	P35609	Alpha-actinin-2	ACTN2	KQYEHNIINYKNNIDKLEGDHQLIQEALVFD	694	23.5213	NaN	NaN	NaN	NaN	NaN	NaN	22.2658	NaN	NaN	NaN	NaN	NaN	NaN	K	3	___1	1	1.97759e-52
P35609;P35609-2;F6THM6	P35609	Alpha-actinin-2	ACTN2	QMNQLKQYEHNIINYKNNIDKLEGDHQLIQE	689	23.2014	NaN	NaN	NaN	NaN	NaN	NaN	22.8017	NaN	NaN	NaN	NaN	NaN	NaN	K	3	___1	1	1.87153e-13
P35609;P35609-2;F6THM6	P35609	Alpha-actinin-2	ACTN2	WIRRTIPWLENRTPEKTMQAMQKKLEDFRDY	311	25.8381	23.7948	23.7116	25.0455	23.5272	24.5756	23.7001	26.2106	NaN	21.9734	23.843	24.0516	24.2696	24.4237	K	2	___1	1	1.29345e-26
P35754	P35754	Glutaredoxin-1	GLRX	_______MAQEFVNCKIQPGKVVVFIKPTCP	9	NaN	NaN	NaN	NaN	NaN	NaN	NaN	NaN	NaN	NaN	NaN	23.4457	21.1172	21.6544	K	2	___1	1	1.05771e-05
P35914-3;P35914-2;P35914	P35914-3	Hydroxymethylglutaryl-CoA lyase, mitochondrial	HMGCL	VKIVEVGPRDGLQNEKNIVSTPVKIKLIDML	48	22.8483	NaN	22.7799	23.0935	23.7593	24.6764	21.9055	23.9093	23.9221	24.5442	23.9463	NaN	23.853	25.4828	K	2	___1	1	1.89145e-134
P36542;P36542-2	P36542;P36542-2	ATP synthase subunit gamma, mitochondrial	ATP5C1	KPARIYGLGSLALYEKADIKGPEDKKKHLLI	79	NaN	NaN	NaN	NaN	NaN	NaN	NaN	20.2011	NaN	22.1621	NaN	NaN	20.7379	NaN	K	3	___1	1	4.25737e-06
P36542;P36542-2	P36542;P36542-2	ATP synthase subunit gamma, mitochondrial	ATP5C1	RLKSIKNIQKITKSMKMVAAAKYARAERELK	49	24.6317	NaN	22.9077	22.751	22.2908	23.1908	23.0105	26.2166	22.4231	23.8931	22.7868	22.5325	24.5479	24.4268	K	2	___1	1	0.00211501
P36542;P36542-2	P36542;P36542-2	ATP synthase subunit gamma, mitochondrial	ATP5C1	EGSIIFNKFRSVISYKTEEKPIFSLNTVASA	197	27.6376	27.0829	27.169	26.4158	26.2768	27.5921	27.3948	28.706	27.0097	27.8765	26.7441	25.8772	27.8182	28.0939	K	2	___1	1	7.2714e-05
P36542;P36542-2	P36542;P36542-2	ATP synthase subunit gamma, mitochondrial	ATP5C1	GILYRTHSDQFLVAFKEVGRKPPTFGDASVI	154	25.317	22.1316	NaN	NaN	NaN	NaN	NaN	26.5206	NaN	NaN	NaN	NaN	NaN	NaN	K	3	___1	1	6.02792e-10
P36871;P36871-3;P36871-2	P36871;P36871-2	Phosphoglucomutase-1	PGM1	KIRIDAMHGVVGPYVKKILCEELGAPANSAV	234	26.9084	24.1205	23.7612	25.075	24.3303	24.0038	23.7186	26.808	23.7425	24.4451	25.8171	24.0585	24.3426	26.2002	K	3	___1	1	1.46831e-13
P36871	P36871	Phosphoglucomutase-1	PGM1	________MVKIVTVKTQAYQDQKPGTSGLR	8	24.847	23.3305	22.2409	22.6594	24.3202	21.7026	21.2512	25.3383	NaN	23.2771	23.1556	23.5852	22.9442	22.4868	K	3	___1	1	2.90837e-49
P36871	P36871	Phosphoglucomutase-1	PGM1	MVKIVTVKTQAYQDQKPGTSGLRKRVKVFQS	16	NaN	22.2639	19.9155	21.5824	NaN	22.256	NaN	NaN	NaN	20.7711	22.1213	22.1869	NaN	NaN	K	2	___1	1	1.68968e-31
P36871;P36871-3;P36871-2	P36871;P36871-2	Phosphoglucomutase-1	PGM1	GSAGATIRLYIDSYEKDVAKINQDPQVMLAP	523	22.5415	NaN	NaN	21.1757	22.4211	21.2607	19.2407	23.0379	20.8587	20.6176	21.0989	NaN	20.6225	22.4866	K	2	___1	1	0.00061824
P36871;P36871-3;P36871-2	P36871;P36871-2	Phosphoglucomutase-1	PGM1	MFDRSFVGKQFSANDKVYTVEKADNFEYSDP	464	22.1052	NaN	NaN	NaN	20.5981	NaN	NaN	22.464	NaN	21.1915	21.2266	NaN	21.7038	22.0714	K	2	___1	1	1.99314e-16
P36871;P36871-3;P36871-2	P36871;P36871-2	Phosphoglucomutase-1	PGM1	VGKQFSANDKVYTVEKADNFEYSDPVDGSIS	470	21.6023	NaN	NaN	NaN	NaN	NaN	NaN	21.3966	NaN	NaN	NaN	NaN	NaN	NaN	K	3	___1	1	1.94396e-05
P36871;P36871-3;P36871-2	P36871;P36871-2	Phosphoglucomutase-1	PGM1	MKDLEALMFDRSFVGKQFSANDKVYTVEKAD	457	NaN	NaN	NaN	NaN	NaN	NaN	NaN	NaN	NaN	NaN	NaN	20.8987	NaN	21	K	2	___1	1	0.00287839
P36871;P36871-2	P36871;P36871-2	Phosphoglucomutase-1	PGM1	QISKTIEEYAVCPDLKVDLGVLGKQQFDLEN	164	NaN	NaN	NaN	NaN	NaN	NaN	NaN	20.3557	NaN	NaN	NaN	NaN	NaN	NaN	K	3	___1	1	5.48432e-05
P36871;P36871-3;P36871-2	P36871;P36871-2	Phosphoglucomutase-1	PGM1	FTRYDYEEVEAEGANKMMKDLEALMFDRSFV	440	23.4653	NaN	NaN	21.6959	22.852	22.1042	21.8236	23.0354	NaN	22.7906	21.9939	NaN	21.5333	23.1706	K	3	___1	1	8.0915e-07
P36957;Q86SW4;H0YJF9;G3V3F0;G3V5M3	P36957	Dihydrolipoyllysine-residue succinyltransferase component of 2-oxoglutarate dehydrogenase complex, mitochondrial	DLST	FFRTTAVCKDDLVTVKTPAFAESVTEGDVRW	74	22.4382	NaN	NaN	NaN	NaN	NaN	NaN	23.3299	NaN	NaN	NaN	NaN	NaN	NaN	K	3	___1	1	5.66669e-20
P36957;P36957-2;Q86SW4	P36957	Dihydrolipoyllysine-residue succinyltransferase component of 2-oxoglutarate dehydrogenase complex, mitochondrial	DLST	MRARHKEAFLKKHNLKLGFMSAFVKASAFAL	277	27.5268	24.9109	26.92	26.9893	27.5818	28.4827	27.1356	28.9159	26.2643	29.7242	28.6937	27.5439	28.349	28.0187	K	3	___1	1	3.09352e-36
P36957;P36957-2	P36957	Dihydrolipoyllysine-residue succinyltransferase component of 2-oxoglutarate dehydrogenase complex, mitochondrial	DLST	MNFADIERTITELGEKARKNELAIEDMDGGT	353	NaN	22.3474	22.594	21.0471	23.1414	23.278	22.3411	23.9091	20.1938	22.0641	22.8137	22.9791	23.5765	23.169	K	2	___1	1	0.000593836
P37837	P37837	Transaldolase	TALDO1	VPVLSAKAAQASDLEKIHLDEKSFRWLHNED	286	25.0458	NaN	20.634	22.8884	23.8104	21.5884	22.6709	25.3039	NaN	20.0839	23.4057	NaN	22.2107	23.0018	K	3	___1	1	6.09245e-06
P37837	P37837	Transaldolase	TALDO1	EKLSDGIRKFAADAVKLERMLTERMFNAENG	321	NaN	NaN	20.823	22.7736	NaN	22.301	21.7246	21.7179	21.5985	NaN	21.9379	NaN	21.8261	22.2703	K	2	___1	1	0.00275212
P38117;P38117-2;M0QY67	P38117	Electron transfer flavoprotein subunit beta	ETFB	LPNIMKAKKKKIEVIKPGDLGVDLTSKLSVI	210	20.1868	NaN	NaN	21.5275	22.5511	23.9276	NaN	20.8398	NaN	NaN	NaN	24.9206	NaN	23.8616	K	2	___1	1	4.55721e-05
P38117;P38117-2	P38117	Electron transfer flavoprotein subunit beta	ETFB	RTAGVKVETTEDLVAKLKEIGRI________	248	NaN	NaN	NaN	NaN	NaN	NaN	NaN	23.7551	NaN	NaN	NaN	26.3486	25.9854	NaN	K	2	___1	1	3.2895e-06
P38117;P38117-2	P38117	Electron transfer flavoprotein subunit beta	ETFB	EAERLGPLQVARVLAKLAEKEKVDLVLLGKQ	110	27.7146	NaN	NaN	27.4037	NaN	28.2096	NaN	NaN	NaN	NaN	NaN	NaN	NaN	NaN	K	2	___1	1	0.00404506
P38646	P38646	Stress-70 protein, mitochondrial	HSPA9	KMEEFKDQLPADECNKLKEEISKMRELLARK	610	23.0127	NaN	21.7225	20.9571	NaN	22.2244	NaN	23.194	NaN	23.3316	23.9713	23.8133	23.5339	23.8325	K	2	___1	1	0.00039739
P38646	P38646	Stress-70 protein, mitochondrial	HSPA9	HIVKEFKRETGVDLTKDNMALQRVREAAEKA	300	NaN	NaN	NaN	NaN	NaN	20.7966	NaN	NaN	NaN	22.7184	20.306	21.4005	21.759	21.4352	K	2	___1	1	7.5017e-37
P38646	P38646	Stress-70 protein, mitochondrial	HSPA9	SSLQQASLKLFEMAYKKMASEREGSGSSGTG	653	NaN	NaN	NaN	NaN	NaN	NaN	NaN	NaN	NaN	19.5446	20.3124	21.2982	19.8659	20.2145	K	2	___1	1	0.00446405
P38646	P38646	Stress-70 protein, mitochondrial	HSPA9	AEGIIHDTETKMEEFKDQLPADECNKLKEEI	600	22.6556	21.2119	21.8626	NaN	21.9632	23.2995	NaN	24.3024	21.4763	25.9753	24.9885	23.5693	24.5503	24.1713	K	2	___1	1	1.21151e-62
P38646;D6RJI2	P38646	Stress-70 protein, mitochondrial	HSPA9	TKRLIGRRYDDPEVQKDIKNVPFKIVRASNG	135	21.2383	24.4633	22.8194	23.0523	24.0286	25.135	23.7498	26.0483	24.1175	25.9308	24.5336	24.5755	24.7962	23.5337	K	2	___1	1	1.10146e-06
P38646	P38646	Stress-70 protein, mitochondrial	HSPA9	EAVNMAEGIIHDTETKMEEFKDQLPADECNK	595	NaN	NaN	NaN	NaN	NaN	NaN	NaN	20.9814	NaN	24.0293	NaN	NaN	NaN	NaN	K	3	___1	1	2.65746e-05
P38646	P38646	Stress-70 protein, mitochondrial	HSPA9	VINEPTAAALAYGLDKSEDKVIAVYDLGGGT	234	NaN	NaN	NaN	NaN	NaN	NaN	NaN	22.4359	NaN	23.6824	NaN	NaN	NaN	NaN	K	3	___1	1	2.25107e-10
P40227;P40227-2	P40227	T-complex protein 1 subunit zeta	CCT6A	FIEKCNNPRSVTLLIKGPNKHTLTQIKDAVR	377	23.1014	NaN	22.0782	23.8466	22.8914	23.075	22.7035	22.258	NaN	22.8739	NaN	23.3258	22.6867	22.9123	K	2	___1	1	0.000155146
P40925;P40925-3;P40925-2;C9JF79;C9JRL4;C9JLV6	P40925	Malate dehydrogenase, cytoplasmic;Malate dehydrogenase	MDH1	GMERKDLLKANVKIFKSQGAALDKYAKKSVK	110	NaN	22.7331	21.6511	22.836	21.9333	22.1754	21.6673	22.2133	22.0241	21.0409	22.4023	23.3187	22.016	23.2884	K	2	___1	1	8.0284e-05
P40925;P40925-3;C9JF79;C9JRL4;C9JLV6	P40925	Malate dehydrogenase, cytoplasmic;Malate dehydrogenase	MDH1	QDCALPLLKDVIATDKEDVAFKDLDVAILVG	73	24.6235	21.7648	20.4459	24.817	25.0256	23.4686	23.3098	25.097	23.8334	21.2613	23.033	22.7825	22.6719	22.3457	K	2	___1	1	5.2905e-10
P40925;P40925-3;P40925-2;B9A041;B8ZZ51	P40925	Malate dehydrogenase, cytoplasmic	MDH1	GEFVTTVQQRGAAVIKARKLSSAMSAAKAIC	236	25.1053	24.5399	23.4451	24.6135	23.7019	23.6428	20.1026	25.6195	NaN	23.0289	23.7032	24.2312	23.4364	23.4002	K	2	___1	1	0.00821817
P40925;P40925-3;P40925-2;C9JF79;C9JRL4	P40925	Malate dehydrogenase, cytoplasmic;Malate dehydrogenase	MDH1	KANVKIFKSQGAALDKYAKKSVKVIVVGNPA	118	26.0456	26.2162	24.7728	25.9591	25.3211	24.597	23.9684	26.2439	25.5827	24.8482	25.6588	25.7065	24.0976	25.7813	K	2	___1	1	0.000802571
P40926;G3XAL0	P40926	Malate dehydrogenase, mitochondrial;Malate dehydrogenase	MDH2	TTLDIVRANTFVAELKGLDPARVNVPVIGGH	185	23.4367	22.4243	27.5701	26.8894	28.2843	27.7826	26.2192	26.2519	25.2343	28.7692	28.1065	25.5303	28.2234	28.6663	K	2	___1	1	3.37187e-174
P40926;P40926-2;G3XAL0	P40926	Malate dehydrogenase, mitochondrial;Malate dehydrogenase	MDH2	KMISDAIPELKASIKKGEDFVKTLK______	329	25.659	NaN	NaN	NaN	NaN	19.633	NaN	NaN	NaN	NaN	NaN	NaN	NaN	NaN	K	2	___1	1	1.899e-06
P40926;P40926-2;G3XAL0	P40926	Malate dehydrogenase, mitochondrial;Malate dehydrogenase	MDH2	IPELKASIKKGEDFVKTLK____________	335	23.8112	NaN	22.6103	23.3531	24.201	23.4742	NaN	23.9958	21.5316	23.8717	23.4414	24.0284	23.1313	23.9247	K	2	___1	1	1.16329e-14
P40926;P40926-2;G3XAL0	P40926	Malate dehydrogenase, mitochondrial;Malate dehydrogenase	MDH2	TYFSTPLLLGKKGIEKNLGIGKVSSFEEKMI	301	30.9352	31.9373	30.8339	31.5814	32.3214	31.8175	30.1235	31.5592	31.5327	31.5432	31.599	32.5772	32.3848	33.0012	K	2	___1	1	2.03528e-264
P40926;P40926-2;G3XAL0	P40926	Malate dehydrogenase, mitochondrial;Malate dehydrogenase	MDH2	LLLGKKGIEKNLGIGKVSSFEEKMISDAIPE	307	24.9658	25.3152	20.7237	25.8126	26.6714	26.3337	23.9206	25.4364	27.4099	26.2745	25.8423	27.3996	26.5761	27.6237	K	3	___1	1	2.03528e-264
P40926;P40926-2;G3XAL0	P40926	Malate dehydrogenase, mitochondrial;Malate dehydrogenase	MDH2	IEKNLGIGKVSSFEEKMISDAIPELKASIKK	314	29.0727	29.4653	30.3124	30.1354	31.4084	30.0104	30.3275	29.3154	28.3777	32.1767	31.0396	30.5519	31.2668	31.1183	K	3	___1	1	1.73077e-72
P40926;P40926-2;G3XAL0	P40926	Malate dehydrogenase, mitochondrial;Malate dehydrogenase	MDH2	TALTGRIQEAGTEVVKAKAGAGSATLSMAYA	239	26.2658	23.4439	23.2306	26.1769	24.1178	26.7033	25.5251	26.6051	25.0512	26.5094	27.3068	25.4744	26.7758	27.4117	K	2	___1	1	4.85976e-12
P40926;P40926-2	P40926	Malate dehydrogenase, mitochondrial	MDH2	AHTPGVAADLSHIETKAAVKGYLGPEQLPDC	74	NaN	NaN	NaN	NaN	NaN	NaN	NaN	21.0277	NaN	NaN	22.8669	NaN	NaN	NaN	K	4	___1	1	4.48267e-32
P40926;P40926-2;G3XAL0	P40926	Malate dehydrogenase, mitochondrial;Malate dehydrogenase	MDH2	SSFEEKMISDAIPELKASIKKGEDFVKTLK_	324	28.6465	28.2928	32.5573	31.9696	33.4154	31.8829	32.6158	29.6714	30.2112	33.9463	32.5479	30.3569	32.8555	33.1	K	3	___1	1	3.40977e-32
P40926;P40926-2;G3XAL0	P40926	Malate dehydrogenase, mitochondrial;Malate dehydrogenase	MDH2	QETECTYFSTPLLLGKKGIEKNLGIGKVSSF	296	26.6802	25.064	25.2874	25.7237	26.5587	27.0272	23.525	26.5795	25.1497	28.5887	27.0679	23.5716	28.1558	28.0881	K	3	___1	1	1.97524e-265
P40926;P40926-2;G3XAL0	P40926	Malate dehydrogenase, mitochondrial;Malate dehydrogenase	MDH2	DPARVNVPVIGGHAGKTIIPLISQCTPKVDF	203	24.1807	NaN	NaN	NaN	NaN	NaN	NaN	22.4788	NaN	NaN	21.1215	22.4558	22.7104	NaN	K	3	___1	1	1.98856e-57
P40939	P40939	Trifunctional enzyme subunit alpha, mitochondrial;Long-chain enoyl-CoA hydratase;Long chain 3-hydroxyacyl-CoA dehydrogenase	HADHA	ESKALMGLYHGQVLCKKNKFGAPQKDVKHLA	350	21.9073	NaN	NaN	NaN	NaN	NaN	NaN	24.1868	NaN	24.0994	22.901	NaN	21.4452	20.9575	K	3	___1	1	8.53251e-06
P40939	P40939	Trifunctional enzyme subunit alpha, mitochondrial;Long-chain enoyl-CoA hydratase;Long chain 3-hydroxyacyl-CoA dehydrogenase	HADHA	DATLTALDRGQQQVFKGLNDKVKKKALTSFE	406	30.834	25.1935	30.6036	29.9255	30.3941	31.8587	29.8206	31.6855	29.8665	32.0481	31.2402	29.5287	31.4489	31.0567	K	2	___1	1	2.2485e-109
P40939	P40939	Trifunctional enzyme subunit alpha, mitochondrial;Long-chain enoyl-CoA hydratase;Long chain 3-hydroxyacyl-CoA dehydrogenase	HADHA	ALDRGQQQVFKGLNDKVKKKALTSFERDSIF	411	29.0666	NaN	26.069	27.0055	26.4099	27.5463	26.9536	29.059	27.999	27.2328	27.3599	27.3098	27.6861	27.6	K	2	___1	1	2.2485e-109
P40939	P40939	Trifunctional enzyme subunit alpha, mitochondrial;Long-chain enoyl-CoA hydratase;Long chain 3-hydroxyacyl-CoA dehydrogenase	HADHA	EVAISCQYRIATKDRKTVLGTPEVLLGALPG	166	24.3119	NaN	NaN	NaN	NaN	NaN	NaN	22.5331	NaN	NaN	NaN	NaN	NaN	NaN	K	3	___1	1	4.0083e-27
P40939;H0YFD6	P40939	Trifunctional enzyme subunit alpha, mitochondrial;Long-chain enoyl-CoA hydratase;Long chain 3-hydroxyacyl-CoA dehydrogenase	HADHA	KTSKDTSASAVAVGLKQGKVIIVVKDGPGFY	531	27.1161	23.811	27.0394	27.7214	28.6088	28.6745	27.026	24.4816	27.3629	27.8691	27.6022	26.9936	28.665	28.862	K	3	___1	1	3.25909e-93
P40939	P40939	Trifunctional enzyme subunit alpha, mitochondrial;Long-chain enoyl-CoA hydratase;Long chain 3-hydroxyacyl-CoA dehydrogenase	HADHA	HGQVLCKKNKFGAPQKDVKHLAILGAGLMGA	359	NaN	NaN	NaN	NaN	NaN	NaN	NaN	NaN	21.4817	NaN	19.9869	22.2276	NaN	NaN	K	2	___1	1	0.0054523
P40939	P40939	Trifunctional enzyme subunit alpha, mitochondrial;Long-chain enoyl-CoA hydratase;Long chain 3-hydroxyacyl-CoA dehydrogenase	HADHA	GYLCESQKFGELVMTKESKALMGLYHGQVLC	334	20.884	24.713	23.0929	NaN	22.3864	25.6797	NaN	22.0278	NaN	23.2634	23.8491	22.0254	22.8521	23.8233	K	2	___1	1	3.27636e-07
P40939;H0YFD6	P40939	Trifunctional enzyme subunit alpha, mitochondrial;Long-chain enoyl-CoA hydratase;Long chain 3-hydroxyacyl-CoA dehydrogenase	HADHA	CLGGPFRFVDLYGAQKIVDRLKKYEAAYGKQ	728	27.315	24.9346	27.1527	27.8335	28.9677	29.2354	27.2117	27.2739	25.565	28.8875	27.7674	23.5992	28.7638	28.0807	K	2	___1	1	1.42318e-23
P40939;H0YFD6	P40939	Trifunctional enzyme subunit alpha, mitochondrial;Long-chain enoyl-CoA hydratase;Long chain 3-hydroxyacyl-CoA dehydrogenase	HADHA	GRKSGKGFYIYQEGVKRKDLNSDMDSILASL	644	NaN	NaN	21.4771	20.8606	23.5878	22.5546	NaN	24.2889	NaN	24.7707	23.5743	21.855	22.2436	23.1619	K	2	___1	1	1.86411e-07
P40939	P40939	Trifunctional enzyme subunit alpha, mitochondrial;Long-chain enoyl-CoA hydratase;Long chain 3-hydroxyacyl-CoA dehydrogenase	HADHA	GIAQVSVDKGLKTILKDATLTALDRGQQQVF	390	22.1173	NaN	NaN	NaN	23.2505	NaN	NaN	21.914	NaN	NaN	NaN	24.3901	NaN	NaN	K	2	___1	1	2.3269e-18
P40939	P40939	Trifunctional enzyme subunit alpha, mitochondrial;Long-chain enoyl-CoA hydratase;Long chain 3-hydroxyacyl-CoA dehydrogenase	HADHA	EKVRKQTKGLYPAPLKIIDVVKTGIEQGSDA	303	26.3349	25.2182	25.8535	23.3489	25.5212	25.775	24.2288	26.2531	23.9901	28.0279	NaN	24.7066	22.8119	27.0291	K	2	___1	1	0.000281513
P40939;H0YFD6	P40939	Trifunctional enzyme subunit alpha, mitochondrial;Long-chain enoyl-CoA hydratase;Long chain 3-hydroxyacyl-CoA dehydrogenase	HADHA	MMSEVIRILQEGVDPKKLDSLTTSFGFPVGA	569	33.5205	33.4878	32.8633	32.9987	32.9157	34.1144	31.8954	33.4854	32.4235	34.0335	33.0816	33.028	34.0682	33.9471	K	2	___1	1	8.77504e-07
P40939	P40939	Trifunctional enzyme subunit alpha, mitochondrial;Long-chain enoyl-CoA hydratase;Long chain 3-hydroxyacyl-CoA dehydrogenase	HADHA	VKGDVAVVRINSPNSKVNTLSKELHSEFSEV	60	27.4402	22.7532	26.8601	26.9282	28.0929	28.3281	27.4952	28.0988	27.9317	26.9933	27.6118	26.1896	28.1288	28.7623	K	2	___1	1	2.06025e-44
P40939	P40939	Trifunctional enzyme subunit alpha, mitochondrial;Long-chain enoyl-CoA hydratase;Long chain 3-hydroxyacyl-CoA dehydrogenase	HADHA	DMMLTGRSIRADRAKKMGLVDQLVEPLGPGL	214	23.2251	NaN	NaN	NaN	NaN	NaN	NaN	NaN	NaN	NaN	NaN	NaN	NaN	NaN	K	3	___1	1	8.14845e-23
P40939	P40939	Trifunctional enzyme subunit alpha, mitochondrial;Long-chain enoyl-CoA hydratase;Long chain 3-hydroxyacyl-CoA dehydrogenase	HADHA	MGLVDQLVEPLGPGLKPPEERTIEYLEEVAI	230	23.9502	NaN	NaN	NaN	22.263	23.1511	NaN	24.7561	NaN	24.3516	23.3893	21.6022	23.5787	22.5768	K	3	___1	1	2.25591e-20
P40939	P40939	Trifunctional enzyme subunit alpha, mitochondrial;Long-chain enoyl-CoA hydratase;Long chain 3-hydroxyacyl-CoA dehydrogenase	HADHA	ALMGLYHGQVLCKKNKFGAPQKDVKHLAILG	353	28.6398	27.7858	27.4265	27.7675	27.1357	27.7712	27.4409	29.3431	25.4657	28.3836	27.5253	27.6991	27.9686	27.3477	K	2	___1	1	0.00171458
P40939	P40939	Trifunctional enzyme subunit alpha, mitochondrial;Long-chain enoyl-CoA hydratase;Long chain 3-hydroxyacyl-CoA dehydrogenase	HADHA	TIPFVRQQVYKKVEEKVRKQTKGLYPAPLKI	289	24.5901	NaN	NaN	NaN	NaN	NaN	NaN	22.7256	NaN	NaN	NaN	NaN	NaN	NaN	K	3	___1	1	8.34422e-34
P40939	P40939	Trifunctional enzyme subunit alpha, mitochondrial;Long-chain enoyl-CoA hydratase;Long chain 3-hydroxyacyl-CoA dehydrogenase	HADHA	SPVDKMQLLEIITTEKTSKDTSASAVAVGLK	516	26.6092	22.9621	27.7046	28.1087	28.231	28.439	25.5653	27.2439	25.2186	27.9123	28.5341	24.0141	29.2133	28.5901	K	3	___1	1	6.05386e-20
P40939;H0YFD6	P40939	Trifunctional enzyme subunit alpha, mitochondrial;Long-chain enoyl-CoA hydratase;Long chain 3-hydroxyacyl-CoA dehydrogenase	HADHA	DKMQLLEIITTEKTSKDTSASAVAVGLKQGK	519	NaN	NaN	19.8449	20.6132	NaN	21.5097	20.805	19.8303	20.7758	NaN	NaN	18.4439	21.9572	21.9767	K	3	___1	1	3.25909e-93
P40939	P40939	Trifunctional enzyme subunit alpha, mitochondrial;Long-chain enoyl-CoA hydratase;Long chain 3-hydroxyacyl-CoA dehydrogenase	HADHA	FTPCQLLADHANSPNKKFYQ___________	759	24.6178	NaN	NaN	NaN	22.049	NaN	NaN	21.8958	NaN	24.6896	22.7474	NaN	23.3262	23.6608	K	3	___1	1	4.62913e-22
P40939	P40939	Trifunctional enzyme subunit alpha, mitochondrial;Long-chain enoyl-CoA hydratase;Long chain 3-hydroxyacyl-CoA dehydrogenase	HADHA	ALPISEIAAVSKRPEKVIGMHYFSPVDKMQL	493	27.8965	NaN	21.6296	NaN	NaN	NaN	NaN	27.7422	NaN	23.5207	21.1494	NaN	22.7199	21.5224	K	3	___1	1	5.19593e-14
P40939	P40939	Trifunctional enzyme subunit alpha, mitochondrial;Long-chain enoyl-CoA hydratase;Long chain 3-hydroxyacyl-CoA dehydrogenase	HADHA	RPEKVIGMHYFSPVDKMQLLEIITTEKTSKD	505	NaN	NaN	NaN	NaN	NaN	NaN	NaN	22.6651	NaN	23.2664	26.8093	24.7826	NaN	NaN	K	3	___1	1	2.55897e-68
P40939	P40939	Trifunctional enzyme subunit alpha, mitochondrial;Long-chain enoyl-CoA hydratase;Long chain 3-hydroxyacyl-CoA dehydrogenase	HADHA	GIEQGSDAGYLCESQKFGELVMTKESKALMG	326	30.3289	28.1305	27.8703	27.9688	30.7218	29.5337	29.1868	30.9432	28.7702	32.7773	31.3372	30.0545	31.2581	30.9459	K	3	___1	1	0
P40939;H0YFD6	P40939	Trifunctional enzyme subunit alpha, mitochondrial;Long-chain enoyl-CoA hydratase;Long chain 3-hydroxyacyl-CoA dehydrogenase	HADHA	AVAVGLKQGKVIIVVKDGPGFYTTRCLAPMM	540	22.925	23.3724	24.0112	24.2243	25.4404	25.5626	24.8399	23.4154	NaN	25.5637	24.7088	24.2905	26.0138	25.0893	K	2	___1	1	5.22315e-30
P42126-2;P42126;Q96DC0	P42126-2	Enoyl-CoA delta isomerase 1, mitochondrial	ECI1;DCI	TQRDADVQNFVSFISKDSIQKSLQMYLERLK	266	23.7884	NaN	NaN	NaN	NaN	NaN	NaN	25.0167	NaN	NaN	NaN	NaN	NaN	NaN	K	3	___1	1	5.05658e-23
P42126-2;P42126;Q96DC0;H3BS70	P42126-2	Enoyl-CoA delta isomerase 1, mitochondrial	ECI1;DCI	FLTELVISLEKLENDKSFRGVILTSDRPGVF	89	29.1067	25.4786	28.3125	28.3885	29.2036	29.8082	29.6066	30.0514	28.6	29.4744	28.7031	28.2544	29.5868	28.9292	K	2	___1	1	8.21865e-11
P42126-2;P42126	P42126-2	Enoyl-CoA delta isomerase 1, mitochondrial	ECI1	RVLVEPDAGAGVAVMKFKNPPVNSLSLEFLT	61	25.1485	24.8632	26.3024	24.128	27.6767	26.9298	26.9772	26.2568	22.7208	28.5168	27.2038	26.0431	27.9622	27.0696	K	3	___1	1	1.94704e-16
P42704	P42704	Leucine-rich PPR motif-containing protein, mitochondrial	LRPPRC	KVLPRIHDVLCKLVEKGETDLIQKAMDFVSQ	868	21.6984	NaN	NaN	NaN	NaN	22.1321	NaN	23.6138	NaN	NaN	NaN	NaN	22.7663	NaN	K	2	___1	1	1.06528e-09
P42704	P42704	Leucine-rich PPR motif-containing protein, mitochondrial	LRPPRC	KEEAYNSLMKSYVSEKDVTSAKALYEHLTAK	1332	NaN	NaN	NaN	NaN	NaN	NaN	NaN	NaN	NaN	NaN	NaN	20.8324	NaN	20.5796	K	2	___1	1	3.89984e-05
P42765;A0A0B4J2A4;K7EME0	P42765	3-ketoacyl-CoA thiolase, mitochondrial	ACAA2	NDAGYFNDEMAPIEVKTKKGKQTMQVDEHAR	209	NaN	NaN	NaN	NaN	22.4212	NaN	NaN	NaN	NaN	NaN	NaN	NaN	NaN	NaN	K	3	___1	1	8.72534e-11
P42765;A0A0B4J2A4	P42765	3-ketoacyl-CoA thiolase, mitochondrial	ACAA2	LLKDFTATDLSEFAAKAALSAGKVSPETVDS	38	20.452	NaN	NaN	NaN	NaN	NaN	NaN	20.4621	NaN	NaN	NaN	NaN	NaN	NaN	K	3	___1	1	9.61027e-08
P42765;A0A0B4J2A4;K7EME0	P42765	3-ketoacyl-CoA thiolase, mitochondrial	ACAA2	ADGAGAVIIASEDAVKKHNFTPLARIVGYFV	269	26.5357	23.8005	27.3172	27.2634	29.5849	28.8175	27.8796	27.7995	27.6717	29.6237	28.1711	26.7121	29.5596	29.0756	K	3	___1	1	0
P42765;A0A0B4J2A4;K7EME0	P42765	3-ketoacyl-CoA thiolase, mitochondrial	ACAA2	ENLAVKHKISREECDKYALQSQQRWKAANDA	181	NaN	NaN	NaN	NaN	NaN	NaN	NaN	NaN	21.8527	NaN	NaN	21.077	21.7002	22.3019	K	2	___1	1	8.42305e-16
P42765;A0A0B4J2A4;K7EME0;K7EJ68	P42765	3-ketoacyl-CoA thiolase, mitochondrial	ACAA2	MSQAPYCVRNVRFGTKLGSDIKLEDSLWVSL	137	32.3101	32.3957	31.5859	31.7106	32.794	32.9479	29.2646	33.0485	31.3105	32.4935	32.4028	32.6588	33.3856	33.1711	K	2	___1	1	3.65786e-05
P42765;A0A0B4J2A4	P42765	3-ketoacyl-CoA thiolase, mitochondrial	ACAA2	___MALLRGVFVVAAKRTPFGAYGGLLKDFT	13	27.6236	28.4267	28.0809	26.8168	29.17	29.0672	25.6742	28.0848	25.7724	29.7097	27.8664	26.873	29.811	28.4102	K	2	___1	1	0.00149332
P42765;A0A0B4J2A4;K7EME0	P42765	3-ketoacyl-CoA thiolase, mitochondrial	ACAA2	SIMGIGPVPAISGALKKAGLSLKDMDLVEVN	305	22.4883	NaN	NaN	NaN	NaN	NaN	NaN	21.1688	NaN	NaN	NaN	NaN	23.7927	NaN	K	3	___1	1	6.04597e-44
P42765;A0A0B4J2A4;K7EME0	P42765	3-ketoacyl-CoA thiolase, mitochondrial	ACAA2	VDEHARPQTTLEQLQKLPPVFKKDGTVTAGN	234	24.3451	25.4098	27.0727	26.0342	27.0399	27.1011	26.7131	25.09	25.8213	28.6932	26.9589	25.4586	27.8924	26.5323	K	4	___1	1	4.29848e-229
P43155-2;P43155;P43155-3	P43155-2	Carnitine O-acetyltransferase	CRAT	SNHRNSWAKAYNTLIKDKVNRDSVRSIQKSI	247	NaN	NaN	21.7832	22.4224	23.1252	23.6978	23.106	23.0419	24.3302	23.4011	22.9839	21.3728	24.3619	22.132	K	3	___1	1	2.09157e-37
P43155-2;P43155;P43155-3	P43155-2	Carnitine O-acetyltransferase	CRAT	LPMPKKLRFNITPEIKSDIEKAKQNLSIMIQ	369	24.5157	23.4686	23.3248	26.6525	27.6196	27.0973	23.9299	22.5304	26.8067	24.1605	25.9998	26.8295	NaN	28.0517	K	3	___1	1	6.06049e-09
P43155-2;P43155;P43155-3	P43155-2	Carnitine O-acetyltransferase	CRAT	KLRFNITPEIKSDIEKAKQNLSIMIQDLDIT	374	NaN	NaN	NaN	NaN	NaN	NaN	NaN	26.6022	NaN	NaN	NaN	NaN	NaN	NaN	K	2	___1	1	6.06049e-09
P43155-2;P43155;P43155-3;H0Y4Z7	P43155-2	Carnitine O-acetyltransferase	CRAT	SCAETNAARLAHYLEKALLDMRALLQSHPRA	588	28.8982	24.4408	25.5088	24.9	26.7762	26.6538	25.2098	29.4595	23.6569	28.4015	26.7852	25.3563	27.1909	26.4707	K	3	___1	1	3.8547e-10
P43155-2;P43155;P43155-3	P43155-2	Carnitine O-acetyltransferase	CRAT	CRVPGPKQDTVSNFSKTKKPPTHITVVHNYQ	174	NaN	NaN	NaN	NaN	NaN	NaN	NaN	21.9258	NaN	NaN	22.0439	22.4588	21.5012	21.1933	K	2	___1	1	1.81744e-07
P43155-2;P43155;P43155-3;H0Y4Z7	P43155-2	Carnitine O-acetyltransferase	CRAT	TDTIRSASMDSLTFVKAMDDSSVTEHQKVEL	459	NaN	NaN	NaN	NaN	22.8945	21.9403	NaN	24.2037	NaN	NaN	NaN	NaN	NaN	NaN	K	3	___1	1	1.47213e-36
P46940;H0YLE8	P46940	Ras GTPase-activating-like protein IQGAP1	IQGAP1	GLKKLTELGTVDPKNKYQELINDIARDIRNQ	1477	NaN	NaN	NaN	NaN	NaN	NaN	NaN	NaN	22.4568	NaN	NaN	NaN	NaN	NaN	K	2	___1	1	0.0023248
P47211	P47211	Galanin receptor type 1	GALR1	VFKCHIRKDSHLSDTKESKSRIDTPPSTNCT	332	26.7515	NaN	NaN	NaN	NaN	NaN	NaN	24.9673	NaN	NaN	NaN	NaN	NaN	NaN	K	2	___1	1	0.000247779
P47755;C9JUG7;F8W9N7;P47755-2;A0A0D9SET8	P47755	F-actin-capping protein subunit alpha-2	CAPZA2	EDQVLITEHGDLGNGKFLDPKNRICFKFDHL	86	24.0005	NaN	NaN	NaN	NaN	NaN	NaN	NaN	NaN	NaN	NaN	NaN	NaN	NaN	K	3	___1	1	1.68816e-27
P47756	P47756	F-actin-capping protein subunit beta	CAPZB	IVNGLRSIDAIPDNQKFKQLQRELSQVLTQR	254	NaN	NaN	21.6131	22.026	22.3901	22.8499	22.4325	NaN	21.2857	21.6296	22.1301	NaN	22.7116	22.4976	K	2	___1	1	0.000527801
P47985;P0C7P4	P47985	Cytochrome b-c1 complex subunit Rieske, mitochondrial;Cytochrome b-c1 complex subunit 11;Putative cytochrome b-c1 complex subunit Rieske-like protein 1	UQCRFS1;UQCRFS1P1	MSASADVLALAKIEIKLSDIPEGKNMAFKWR	155	NaN	NaN	NaN	NaN	NaN	NaN	NaN	21.5425	NaN	NaN	NaN	NaN	NaN	NaN	K	2	___1	1	0.00130143
P48047	P48047	ATP synthase subunit O, mitochondrial	ATP5O	TDPSILGGMIVRIGEKYVDMSVKTKIQKLGR	192	27.8379	25.8223	26.3774	25.8969	26.3738	27.7029	27.6439	27.7054	26.2724	27.3693	26.2861	26.0732	27.6863	27.6824	K	2	___1	1	2.09465e-07
P48047	P48047	ATP synthase subunit O, mitochondrial	ATP5O	GMIVRIGEKYVDMSVKTKIQKLGRAMREIV_	199	26.4727	NaN	23.9099	23.6649	23.9364	25.2208	25.4322	26.8608	24.6145	25.3806	24.1041	25.6716	24.9364	24.8608	K	2	___1	1	0.000970291
P48047;H7C0C1;H7C086	P48047	ATP synthase subunit O, mitochondrial	ATP5O	LYSAASKQNKLEQVEKELLRVAQILKEPKVA	60	30.6572	25.4771	28.5477	28.8675	30.4579	30.5392	30.6768	31.1647	30.4278	31.253	29.7142	28.9238	30.8053	31.291	K	2	___1	1	6.43146e-20
P48047;H7C0C1;H7C086	P48047	ATP synthase subunit O, mitochondrial	ATP5O	GRYATALYSAASKQNKLEQVEKELLRVAQIL	54	29.1943	24.4912	26.0257	26.0729	25.8926	27.5683	26.817	28.915	28.1047	26.9631	26.8257	27.2896	27.6361	27.7484	K	2	___1	1	6.43146e-20
P48047;H7C068	P48047	ATP synthase subunit O, mitochondrial	ATP5O	LKTVLKSFLSQGQVLKLEAKTDPSILGGMIV	172	27.4414	26.4868	29.8106	29.1976	30.3194	31.2146	30.3308	29.136	25.7636	31.4784	25.2794	NaN	30.849	30.7262	K	3	___1	1	2.00255e-80
P48047;H7C068	P48047	ATP synthase subunit O, mitochondrial	ATP5O	SPLEEATLSELKTVLKSFLSQGQVLKLEAKT	162	29.5833	27.4423	30.9772	31.0352	30.7155	32.1693	31.2141	30.5152	30.2223	32.1814	30.7495	30.6319	31.6131	31.372	K	3	___1	1	1.16672e-80
P48047;H7C0C1	P48047	ATP synthase subunit O, mitochondrial	ATP5O	LKEPKVAASVLNPYVKRSIKVKSLNDITAKE	84	24.0799	22.7982	22.448	22.1013	24.2674	23.2425	NaN	24.7191	22.3805	23.8021	23.7281	22.596	23.059	23.9752	K	2	___1	1	1.38015e-17
P48047;H7C0C1	P48047	ATP synthase subunit O, mitochondrial	ATP5O	LEQVEKELLRVAQILKEPKVAASVLNPYVKR	70	NaN	NaN	25.6525	24.864	24.6276	26.3608	24.9483	25.7672	24.7512	25.8015	25.782	22.309	26.1437	26.0083	K	2	___1	1	0.00220072
P48147	P48147	Prolyl endopeptidase	PREP	YPSKDGTKIPMFIVHKKGIKLDGSHPAFLYG	457	20.7973	NaN	NaN	21.8274	NaN	NaN	NaN	22.9401	NaN	NaN	21.6012	21.1153	NaN	21.7685	K	3	___1	1	0.00707539
P48735;P48735-2	P48735	Isocitrate dehydrogenase [NADP], mitochondrial	IDH2	QTDDQVTIDSALATQKYSVAVKCATITPDEA	106	30.0919	30.3497	30.4795	30.3016	32.32	30.8238	29.5714	27.3885	31.6363	33.0306	31.6701	31.1085	32.2706	31.6012	K	3	___1	1	0
P48735;P48735-2	P48735	Isocitrate dehydrogenase [NADP], mitochondrial	IDH2	TIDSALATQKYSVAVKCATITPDEARVEEFK	112	NaN	NaN	NaN	NaN	NaN	NaN	NaN	NaN	20.8565	NaN	NaN	NaN	NaN	NaN	K	2	___1	1	4.82705e-16
P48735;P48735-2	P48735	Isocitrate dehydrogenase [NADP], mitochondrial	IDH2	DGDEMTRIIWQFIKEKLILPHVDIQLKYFDL	69	26.4796	23.4099	22.4901	24.2619	NaN	25.2187	NaN	26.9205	22.3959	23.7897	23.8916	22.8377	25.4283	25.2524	K	3	___1	1	2.72375e-10
P48735;P48735-2	P48735	Isocitrate dehydrogenase [NADP], mitochondrial	IDH2	FIKEKLILPHVDIQLKYFDLGLPNRDQTDDQ	80	NaN	NaN	NaN	NaN	NaN	NaN	NaN	23.4242	NaN	22.2062	25.6951	21.8236	NaN	NaN	K	3	___1	1	9.3238e-15
P48735;P48735-2	P48735	Isocitrate dehydrogenase [NADP], mitochondrial	IDH2	RNILGGTVFREPIICKNIPRLVPGWTKPITI	155	26.5799	24.1326	25.7592	27.2598	28.1972	29.1315	25.0831	29.6582	29.5528	29.0677	28.3645	24.0673	23.7727	23.205	K	3	___1	1	1.39132e-11
P48735;P48735-2	P48735	Isocitrate dehydrogenase [NADP], mitochondrial	IDH2	LDGNQDLIRFAQMLEKVCVETVESGAMTKDL	400	26.6792	21.0922	24.7794	24.3786	26.4241	27.3253	26.7257	28.2695	27.0898	29.9251	27.9068	26.4044	28.6371	27.4246	K	3	___1	1	2.0526e-50
P48735;P48735-2	P48735	Isocitrate dehydrogenase [NADP], mitochondrial	IDH2	IASIFAWTRGLEHRGKLDGNQDLIRFAQMLE	384	31.5014	28.1007	30.8542	29.9991	31.7344	31.8819	31.1389	32.0818	30.342	32.0212	30.5461	29.766	32.0234	31.9254	K	2	___1	1	1.21208e-15
P48735;P48735-2	P48735	Isocitrate dehydrogenase [NADP], mitochondrial	IDH2	TKPITIGRHAHGDQYKATDFVADRAGTFKMV	180	29.4759	22.4899	24.2078	24.9973	25.9824	24.7213	23.4986	27.0163	23.8474	26.2888	24.9946	23.815	24.0538	25.2827	K	3	___1	1	1.39414e-110
P49189;P49189-2	P49189	4-trimethylaminobutyraldehyde dehydrogenase	ALDH9A1	CCNGTRVFVQKEILDKFTEEVVKQTQRIKIG	303	20.7331	22.7862	23.6736	24.6399	21.8205	23.9657	23.4777	24.797	24.5028	25.2708	25.0581	24.9481	24.7862	24.6137	K	2	___1	1	4.73857e-12
P49189;P49189-2	P49189	4-trimethylaminobutyraldehyde dehydrogenase	ALDH9A1	FVQKEILDKFTEEVVKQTQRIKIGDPLLEDT	310	23.3427	25.5355	25.0642	25.0333	25.192	26.4193	25.0157	25.5287	23.9758	22.3124	25.6427	24.241	26.3004	25.505	K	3	___1	1	2.06151e-99
P49189	P49189	4-trimethylaminobutyraldehyde dehydrogenase	ALDH9A1	RGGARVEPADASGTEKAFEPATGRVIATFTC	30	20.8331	24.7071	23.7223	24.6242	25.8743	25.5595	24.0547	24.0652	23.3668	24.6865	24.2718	23.7684	25.2443	24.7902	K	3	___1	1	9.18e-95
S4R3W9;P49406;H7C2J0	S4R3W9	39S ribosomal protein L19, mitochondrial	MRPL19	PVVQEPNQKVPVNELKVKMKPKPWSKRWERP	123	NaN	NaN	21.3163	20.8516	NaN	21.034	21.4434	NaN	21.4425	22.7256	22.1169	NaN	22.7116	21.5602	K	2	___1	1	0.00307963
P49411;H3BNU3	P49411	Elongation factor Tu, mitochondrial	TUFM	CRGLAVEAKKTYVRDKPHVNVGTIGHVDHGK	55	24.4488	NaN	NaN	NaN	NaN	NaN	NaN	24.6071	NaN	NaN	NaN	NaN	NaN	NaN	K	3	___1	1	1.6982e-72
P49411	P49411	Elongation factor Tu, mitochondrial	TUFM	DAVDTYIPVPARDLEKPFLLPVEAVYSVPGR	256	26.3475	25.9228	25.6023	25.2419	24.6567	22.2026	NaN	24.7216	NaN	27.696	27.0394	24.9983	26.0885	25.2012	K	2	___1	1	9.74187e-26
P49411	P49411	Elongation factor Tu, mitochondrial	TUFM	SALCALEGRDPELGLKSVQKLLDAVDTYIPV	234	NaN	NaN	21.6601	NaN	22.0072	22.6355	NaN	21.3737	21.7118	22.0054	21.74	NaN	21.2655	21.9401	K	2	___1	1	1.9428e-07
P49411	P49411	Elongation factor Tu, mitochondrial	TUFM	ALEGRDPELGLKSVQKLLDAVDTYIPVPARD	238	NaN	NaN	NaN	NaN	NaN	NaN	NaN	NaN	NaN	23.3725	23.2748	22.6779	21.6716	NaN	K	3	___1	1	4.20827e-30
P49411	P49411	Elongation factor Tu, mitochondrial	TUFM	RGLKREDLRRGLVMVKPGSIKPHQKVEAQVY	342	23.2905	20.9927	22.4649	22.3313	23.0226	24.2491	22.5458	22.955	23.3465	23.9699	22.8548	24.4955	24.1925	23.9077	K	3	___1	1	5.36317e-08
P49411	P49411	Elongation factor Tu, mitochondrial	TUFM	LTAAITKILAEGGGAKFKKYEEIDNAPEERA	88	24.1961	NaN	24.5942	24.6828	25.9251	NaN	NaN	25.455	NaN	23.7361	25.2628	25.5929	NaN	NaN	K	2	___1	1	0.00194939
P49411	P49411	Elongation factor Tu, mitochondrial	TUFM	DLKFNLILRQPMILEKGQRFTLRDGNRTIGT	418	NaN	NaN	23.2398	21.6197	23.9592	24.8067	22.8463	24.7259	22.8361	25.0266	24.6557	23.3569	24.286	23.9639	K	2	___1	1	0.00288302
P49590;D6RB22;D6RJE6	P49590	Probable histidine--tRNA ligase, mitochondrial	HARS2	VAEAVLTSQLKAHQEKPNFIIKTPKGTRDLS	52	23.3041	NaN	NaN	NaN	NaN	20.8012	NaN	23.6161	NaN	24.3189	22.3937	NaN	NaN	21.8798	K	3	___1	1	0.000528966
P49590;B4DQ67;P49590-2	P49590	Probable histidine--tRNA ligase, mitochondrial	HARS2	LDKMAWKDVRHEMVVKKGLAPEVADRIGDYV	257	NaN	NaN	NaN	NaN	NaN	NaN	NaN	22.531	NaN	NaN	NaN	NaN	NaN	NaN	K	2	___1	1	0.00702582
P49748;P49748-3;P49748-2;G3V1M7;J3QRJ8;K7EMF8	P49748	Very long-chain specific acyl-CoA dehydrogenase, mitochondrial	ACADVL	LAVRALEQFATVVEAKLIKHKKGIVNEQFLL	550	21.7671	NaN	NaN	NaN	NaN	NaN	NaN	21.8518	NaN	NaN	NaN	NaN	NaN	NaN	K	2	___1	1	7.64614e-08
P49748;P49748-3;P49748-2	P49748	Very long-chain specific acyl-CoA dehydrogenase, mitochondrial	ACADVL	VVERGFGGITHGPPEKKMGIKASNTAEVFFD	298	25.4424	NaN	24.3536	24.3713	26.4606	25.7361	22.9485	25.7197	24.02	26.4881	25.399	24.759	25.166	25.1122	K	3	___1	1	2.596e-15
P49748;P49748-3;P49748-2;K7EQP4;J3QKU9	P49748	Very long-chain specific acyl-CoA dehydrogenase, mitochondrial	ACADVL	AHQSIGFKGILLFGTKAQKEKYLPKLASGET	195	NaN	NaN	NaN	NaN	24.2757	25.2204	NaN	21.7938	NaN	25.5592	NaN	NaN	23.5942	23.4527	K	2	___1	1	0.00354933
P49748;P49748-3;P49748-2;G3V1M7	P49748	Very long-chain specific acyl-CoA dehydrogenase, mitochondrial	ACADVL	NDILRLFVALQGCMDKGKELSGLGSALKNPF	480	NaN	NaN	NaN	NaN	NaN	NaN	NaN	NaN	NaN	NaN	NaN	20.8746	NaN	NaN	K	2	___1	1	0.00407204
P49748;P49748-3;P49748-2	P49748	Very long-chain specific acyl-CoA dehydrogenase, mitochondrial	ACADVL	VFAKTPVTDPATGAVKEKITAFVVERGFGGI	276	NaN	NaN	22.2807	21.8965	22.0547	24.1329	22.6647	NaN	23.1954	23.2677	23.3073	21.8007	23.6478	23.3224	K	2	___1	1	6.88059e-21
P49748;P49748-3;P49748-2;J3KSR4	P49748	Very long-chain specific acyl-CoA dehydrogenase, mitochondrial	ACADVL	AKAVDHATNRTQFGEKIHNFGLIQEKLARMV	372	23.2248	NaN	NaN	NaN	NaN	NaN	NaN	24.1655	NaN	23.4371	22.6932	NaN	22.1434	NaN	K	3	___1	1	5.95191e-06
P49748;P49748-3;P49748-2	P49748	Very long-chain specific acyl-CoA dehydrogenase, mitochondrial	ACADVL	DAASIRTSAVPSPCGKYYTLNGSKLWISNGG	239	22.505	20.7999	21.4487	21.6784	NaN	22.464	NaN	22.6408	23.6521	24.4937	23.844	24.2087	23.627	23.1442	K	3	___1	1	2.43985e-19
P49773;D6REP8;D6RE99;D6RD60;D6RC06	P49773	Histidine triad nucleotide-binding protein 1	HINT1	_________MADEIAKAQVARPGGDTIFGKI	7	NaN	22.5126	NaN	23.9927	NaN	NaN	NaN	21.7858	NaN	NaN	NaN	NaN	NaN	NaN	K	3	___1	1	2.57757e-11
P49773;D6REP8;D6RE99;D6RD60;D6RC06	P49773	Histidine triad nucleotide-binding protein 1	HINT1	AKAQVARPGGDTIFGKIIRKEIPAKIIFEDD	21	21.7458	NaN	22.7578	23.842	23.2562	NaN	NaN	22.3062	NaN	NaN	23.7475	23.9749	23.1537	23.5746	K	2	___1	1	4.32332e-12
P49961-3;P49961;P49961-2;P49961-6	P49961-3	Ectonucleoside triphosphate diphosphohydrolase 1	ENTPD1	VHQVEECRVKGPGISKFVQKVNEIGIYLTDC	100	21.707	NaN	NaN	20.8023	NaN	20.3177	NaN	21.9545	NaN	NaN	20.6102	NaN	NaN	NaN	K	2	___1	1	0.000114701
P50213-2;P50213;H0YMU3;H0YLI6;H0YKD0	P50213-2	Isocitrate dehydrogenase [NAD] subunit alpha, mitochondrial	IDH3A	KESMDKNKMGLKGPLKTPIAAGHPSMNLLLR	22	24.0098	NaN	26.6959	24.5746	26.4033	24.8042	25.0522	26.8658	24.707	29.1299	27.1528	27.2264	27.7687	26.3277	K	3	___1	1	3.49873e-14
P50213-2;P50213;H0YL72;H0YNF5;H0YM46	P50213-2	Isocitrate dehydrogenase [NAD] subunit alpha, mitochondrial	IDH3A	FDHAARIEAACFATIKDGKSLTKDLGGNAKC	258	23.4718	NaN	22.1178	NaN	NaN	22.2918	NaN	23.9499	23.49	24.5513	22.2706	22.8998	23.5265	23.6638	K	2	___1	1	9.89298e-16
P50213-2;P50213;H0YL72;H0YMU3;H0YLI6	P50213-2	Isocitrate dehydrogenase [NAD] subunit alpha, mitochondrial	IDH3A	DGVVQSIKLITEGASKRIAEFAFEYARNNHR	99	NaN	21.6969	22.4222	21.7375	20.6015	20.3059	NaN	23.6846	NaN	23.48	22.6708	22.9441	22.9984	22.6576	K	2	___1	1	0.00314401
P50213-2;P50213;H0YL72	P50213-2	Isocitrate dehydrogenase [NAD] subunit alpha, mitochondrial	IDH3A	HKANIMRMSDGLFLQKCREVAESCKDIKFNE	136	NaN	NaN	NaN	NaN	NaN	NaN	NaN	NaN	NaN	22.2747	NaN	NaN	20.5189	21.1681	K	2	___1	1	0.000145944
P50440-2;P50440	P50440-2	Glycine amidinotransferase, mitochondrial	GATM	VMVDANEVPIQKMFEKLGITTIKVNIRNANS	353	NaN	NaN	NaN	NaN	NaN	NaN	NaN	21.8801	NaN	22.9977	NaN	NaN	NaN	NaN	K	2	___1	1	0.000567298
P50461	P50461	Cysteine and glycine-rich protein 3	CSRP3	TSNPSKFTAKFGESEKCPRCGKSVYAAEKVM	119	20.4046	NaN	NaN	NaN	NaN	NaN	NaN	21.1174	NaN	19.8955	21.1076	NaN	20.3117	20.2218	K	2	___1	1	0.00309014
P50461	P50461	Cysteine and glycine-rich protein 3	CSRP3	PARSVTTSNPSKFTAKFGESEKCPRCGKSVY	113	26.5037	23.5373	26.5554	27.4016	26.8811	27.3468	26.8513	26.0929	25.2968	25.3736	26.3746	24.093	26.7209	26.7394	K	2	___1	1	0.000622082
P50461	P50461	Cysteine and glycine-rich protein 3	CSRP3	GPTGIGFGGLTQQVEKKE_____________	192	20.5675	NaN	NaN	NaN	NaN	NaN	NaN	21.4328	NaN	NaN	NaN	NaN	NaN	NaN	K	3	___1	1	2.22299e-16
P50461	P50461	Cysteine and glycine-rich protein 3	CSRP3	QSPKPARSVTTSNPSKFTAKFGESEKCPRCG	109	27.1414	23.3457	27.3227	27.727	27.1033	27.6757	27.3075	25.1043	26.0108	26.6214	27.776	24.7866	27.2502	27.5911	K	2	___1	1	7.1972e-20
P50461	P50461	Cysteine and glycine-rich protein 3	CSRP3	SEKCPRCGKSVYAAEKVMGGGKPWHKTCFRC	132	22.0976	24.3286	23.6446	24.5869	24.1331	24.4013	21.9875	22.8302	23.8638	21.1325	24.7921	23.8348	23.904	24.2326	K	2	___1	1	2.4362e-05
P50502;H7C3I1;Q3KNR6;Q8NFI4;F6VDH7;Q8IZP2	P50502	Hsc70-interacting protein;Putative protein FAM10A5;Putative protein FAM10A4	ST13;ST13P5;ST13P4	TDAIKLNPRLAILYAKRASVFVKLQKPNAAI	153	23.7076	NaN	20.5738	21.7863	21.9544	22.4602	21.9021	22.9723	NaN	23.6706	22.6295	NaN	23.1001	22.1968	K	2	___1	1	0.00276148
P50990;P50990-2;P50990-3	P50990	T-complex protein 1 subunit theta	CCT8	MDDIERAVDDGVNTFKVLTRDKRLVPGGGAT	400	23.8117	NaN	NaN	NaN	NaN	NaN	26.0201	24.0893	NaN	25.8696	26.226	25.3625	25.3546	25.6345	K	2	___1	1	7.26209e-21
P51452;P51452-2;K7ES89	P51452	Dual specificity protein phosphatase 3	DUSP3	YVGNASVAQDIPKLQKLGITHVLNAAEGRSF	53	22.536	NaN	NaN	NaN	NaN	NaN	NaN	24.1544	NaN	NaN	NaN	NaN	NaN	NaN	K	3	___1	1	8.77758e-06
P51608;P51608-2	P51608	Methyl-CpG-binding protein 2	MECP2	VKEVVKPLLVSTLGEKSGKGLKTCKSPGRKS	331	21.0292	20.8004	NaN	22.3438	22.1178	20.8831	21.5144	21.4467	NaN	19.9586	22.425	22.5632	22.407	22.0216	K	2	___1	1	0.000401631
P51608;P51608-2	P51608	Methyl-CpG-binding protein 2	MECP2	AKTQPAVATAATAAEKYKHRGEGERKDIVSS	449	21.8469	NaN	NaN	21.5592	21.5454	NaN	21.3833	NaN	NaN	NaN	20.5285	NaN	21.0608	NaN	K	3	___1	1	6.37804e-05
P51884	P51884	Lumican	LUM	LQHNRLKEDAVSAAFKGLKSLEYLDLSFNQI	181	20.6912	NaN	21.3925	23.7766	22.2332	21.8317	21.235	22.5532	21.9427	21.9009	22.6296	23.7779	22.4961	22.3976	K	2	___1	1	0.000546542
P51884;CON__Q05443	P51884	Lumican	LUM	DIKSFCKILGPLSYSKIKHLRLDGNRISETS	305	23.8704	NaN	23.8715	26.01	24.4277	24.5808	23.3952	24.1585	NaN	NaN	24.7508	NaN	25.0619	25.1305	K	2	___1	1	0.0018764
P51884;CON__Q05443	P51884	Lumican	LUM	YLDNNKISNIPDEYFKRFNALQYLRLSHNEL	226	NaN	21.6451	20.9368	22.7545	23.1665	NaN	NaN	21.0451	21.3738	NaN	22.0968	23.0695	21.6856	22.2257	K	2	___1	1	0.000219135
P51888	P51888	Prolargin	PRELP	FKSFPNLAFIRLNYNKLTDRGLPKNSFNISN	277	NaN	NaN	NaN	22.6318	NaN	21.5224	NaN	21.7894	NaN	NaN	NaN	NaN	NaN	NaN	K	2	___1	1	0.00168164
P51970	P51970	NADH dehydrogenase [ubiquinone] 1 alpha subcomplex subunit 8	NDUFA8	AVLKAAAHHYGAQCDKPNKEFMLCRWEEKDP	38	20.6886	NaN	NaN	NaN	NaN	NaN	NaN	23.3027	NaN	NaN	NaN	NaN	NaN	NaN	K	3	___1	1	1.04835e-29
P51970	P51970	NADH dehydrogenase [ubiquinone] 1 alpha subcomplex subunit 8	NDUFA8	YTGQQLFRHCRKQQAKFDECVLDKLGWVRPD	106	NaN	NaN	NaN	NaN	NaN	NaN	NaN	21.7502	NaN	NaN	NaN	NaN	NaN	NaN	K	2	___1	1	0.00793351
P51970	P51970	NADH dehydrogenase [ubiquinone] 1 alpha subcomplex subunit 8	NDUFA8	IVELPTLEELKVDEVKISSAVLKAAAHHYGA	19	19.9836	NaN	NaN	NaN	NaN	NaN	NaN	21.092	NaN	NaN	19.5288	NaN	NaN	NaN	K	2	___1	1	3.31022e-05
P52179;P52179-2;A8MX12;J3KRK2	P52179	Myomesin-1	MYOM1	KATNHSTVVLVGDVFKKLQKEAEFQRQEWIR	1339	NaN	NaN	NaN	NaN	NaN	NaN	NaN	22.3446	NaN	NaN	NaN	NaN	NaN	NaN	K	3	___1	1	1.225e-05
P52179;P52179-2;A8MX12	P52179	Myomesin-1	MYOM1	KWREANVKAVSEEAYKISNLKENMVYQFQVA	997	NaN	NaN	NaN	21.1045	21.601	22.5809	20.8494	22.3081	20.7611	NaN	20.1441	NaN	21.2277	22.0887	K	2	___1	1	7.1972e-20
P52179;P52179-2;A8MX12	P52179	Myomesin-1	MYOM1	DEEELKRLLALSHEHKFPTVPVKSELAVEIL	1240	NaN	NaN	NaN	NaN	NaN	NaN	NaN	21.1839	NaN	NaN	NaN	NaN	NaN	NaN	K	3	___1	1	0.000238293
P52179;P52179-2;A8MX12	P52179	Myomesin-1	MYOM1	FIPEEEARMAALESLKGGKKAK_________	1679	NaN	NaN	NaN	NaN	NaN	NaN	NaN	NaN	NaN	NaN	20.5172	NaN	NaN	NaN	K	2	___1	1	0.00401707
P52179;P52179-2;A8MX12	P52179	Myomesin-1	MYOM1	VHSGRTPVTGYFVDLKEAKAKEDQWRGLNEA	1078	NaN	NaN	22.8113	23.4158	NaN	23.5349	22.0749	21.286	NaN	NaN	NaN	NaN	NaN	NaN	K	2	___1	1	5.10569e-05
P52179;P52179-2;A8MX12	P52179	Myomesin-1	MYOM1	AGTENWQRVNTELPVKSPRFALFDLAEGKSY	693	NaN	NaN	20.295	21.9422	21.2204	NaN	22.0588	NaN	21.8505	NaN	NaN	NaN	NaN	22.6454	K	2	___1	1	0.00160204
P52179;P52179-2;A8MX12	P52179	Myomesin-1	MYOM1	PSRVSEPVAALDPAEKARLKSRPSAPWTGQI	610	NaN	21.3548	NaN	21.3251	21.7525	21.5588	21.944	21.7777	NaN	NaN	21.0936	20.4215	21.4979	22.7209	K	2	___1	1	0.000258239
P52209-2;P52209;K7ELN9	P52209-2	6-phosphogluconate dehydrogenase, decarboxylating	PGD	KDERIQASKKLKGPQKFQFDGDKKSFLEDIR	296	NaN	NaN	NaN	21.5868	21.2411	21.4202	NaN	22.2218	20.1368	NaN	NaN	NaN	NaN	NaN	K	2	___1	1	0.0026652
P52758;H0YBX3;H0YB34	P52758	Ribonuclease UK114	HRSP12	INDFNTVNEIYKQYFKSNFPARAAYQVAALP	101	NaN	NaN	NaN	NaN	NaN	NaN	NaN	22.6032	NaN	22.5445	20.1669	19.016	21.9354	21.3395	K	2	___1	1	0.00370245
P53004	P53004	Biliverdin reductase A	BLVRA	DQNIFVQKLLGQFSEKELAAEKKRILHCLGL	269	25.9647	22.2397	25.5191	26.8171	27.7581	26.2713	24.9389	26.66	25.6199	26.1523	26.3925	25.4016	25.5902	25.7138	K	2	___1	1	3.4157e-36
P53396-2;P53396;P53396-3	P53396-2	ATP-citrate synthase	ACLY	QKFYWGHKEILIPVFKNMADAMRKHPEVDVL	544	21.7472	NaN	NaN	NaN	NaN	NaN	NaN	22.5513	NaN	NaN	NaN	NaN	NaN	NaN	K	2	___1	1	0.000273093
P53597	P53597	Succinyl-CoA ligase [ADP/GDP-forming] subunit alpha, mitochondrial	SUCLG1	KGGQTHLGLPVFNTVKEAKEQTGATASVIYV	105	27.7348	27.3624	28.3282	27.949	28.9671	28.3704	26.1087	29.3036	27.1317	30.1859	28.6513	28.4829	29.4612	28.9297	K	3	___1	1	2.31369e-193
P53597	P53597	Succinyl-CoA ligase [ADP/GDP-forming] subunit alpha, mitochondrial	SUCLG1	NPGECKIGIMPGHIHKKGRIGIVSRSGTLTY	192	25.6052	22.9662	24.0754	22.9772	24.2023	NaN	21.5391	25.559	19.5969	24.8516	23.3685	23.4737	24.215	23.8868	K	3	___1	1	0.000126798
P53597;H7C233	P53597	Succinyl-CoA ligase [ADP/GDP-forming] subunit alpha, mitochondrial	SUCLG1	SYTASRQHLYVDKNTKIICQGFTGKQGTFHS	57	23.6841	23.1458	22.9445	22.8153	22.3771	23.0939	22.7132	25.2137	23.8882	25.2005	24.746	25.6629	24.929	24.4845	K	2	___1	1	5.65698e-30
P53778-2;P53778;B5MDL5	P53778-2	Mitogen-activated protein kinase 12	MAPK12	LDEWKRVTYKEVLSFKPPRQLGARVSKETPL	342	NaN	22.1779	21.5807	22.8152	23.0117	22.4284	22.6265	NaN	NaN	NaN	NaN	22.2701	NaN	22.2811	K	2	___1	1	0.00407905
P54296;E7EWH9;A0A0J9YVV7	P54296	Myomesin-2	MYOM2	AFAEFQQFKAAAFAEKNRGRLIGGLPDVVTI	1341	23.7152	NaN	NaN	24.4753	23.3794	24.1742	24.0789	NaN	23.0467	21.8782	23.4565	22.3991	20.4993	23.2516	K	2	___1	1	0.00177528
P54296;E7EWH9;A0A0J9YVV7	P54296	Myomesin-2	MYOM2	PKFSGGSPILGYYLDKREVHHKNWHEVNSSP	749	23.4336	NaN	22.849	22.3611	NaN	NaN	21.9138	24.4859	NaN	24.7149	24.9439	NaN	22.1396	23.0453	K	2	___1	1	9.28781e-13
P54296;E7EWH9;A0A0J9YVV7	P54296	Myomesin-2	MYOM2	MAWLQICEPTEKDKGKYTFEIFDGKDNHQRS	1300	23.8324	NaN	20.8541	NaN	NaN	NaN	NaN	23.4873	NaN	NaN	NaN	NaN	NaN	NaN	K	2	___1	1	0.000757759
P54296;E7EWH9;A0A0J9YVV7	P54296	Myomesin-2	MYOM2	GEKIPDMAPPQQAKPKLIPASASAAGQ____	1454	NaN	NaN	NaN	21.8285	NaN	NaN	NaN	NaN	NaN	NaN	NaN	NaN	NaN	NaN	K	2	___1	1	1.09766e-05
P54296	P54296	Myomesin-2	MYOM2	_____MSLVTVPFYQKRHRHFDQSYRNIQTR	11	21.2282	NaN	NaN	NaN	NaN	NaN	22.8243	21.4294	NaN	NaN	22.4933	NaN	NaN	NaN	K	2	___1	1	0.000771443
P54296;E7EWH9;A0A0J9YVV7	P54296	Myomesin-2	MYOM2	LNCDGHSMTLGWKVPKFSGGSPILGYYLDKR	735	NaN	23.4044	24.2387	24.5522	24.0876	23.2467	24.1144	23.4024	NaN	24.2087	24.5443	NaN	NaN	NaN	K	2	___1	1	1.15209e-57
P54296;E7EWH9;A0A0J9YVV7	P54296	Myomesin-2	MYOM2	EWITVNQTTTANRYLKVSDLQQGKTYVFRVR	873	NaN	NaN	NaN	NaN	NaN	NaN	NaN	NaN	NaN	NaN	NaN	NaN	NaN	21.0051	K	2	___1	1	0.00258016
P54296	P54296	Myomesin-2	MYOM2	YRNIQTRYLLDEYASKKRASTQASSQKSLSQ	35	22.5058	21.6041	21.5376	22.4145	21.8539	22.416	22.7279	23.2802	22.2765	21.8067	22.5441	22.1719	NaN	23.2804	K	2	___1	1	0.000138786
P54296	P54296	Myomesin-2	MYOM2	NRSRYQSLVAAYGEAKRQRFLSELAHLEEDV	100	23.342	NaN	NaN	NaN	NaN	NaN	NaN	22.3876	NaN	NaN	NaN	NaN	NaN	NaN	K	2	___1	1	0.000212953
P54652	P54652	Heat shock-related 70 kDa protein 2	HSPA2	ELNADLFRGTLEPVEKALRDAKLDKGQIQEI	322	21.432	NaN	21.4511	23.1068	22.6651	22.2615	20.6155	20.882	NaN	NaN	22.5561	NaN	21.8	20.8324	K	2	___1	1	0.00181772
P54652	P54652	Heat shock-related 70 kDa protein 2	HSPA2	EDFDNRMVSHLAEEFKRKHKKDIGPNKRAVR	249	NaN	NaN	19.6146	NaN	NaN	NaN	NaN	21.8317	NaN	NaN	NaN	NaN	NaN	NaN	K	3	___1	1	0.00166978
P54652	P54652	Heat shock-related 70 kDa protein 2	HSPA2	KNQVAMNPTNTIFDAKRLIGRKFEDATVQSD	72	NaN	NaN	21.3895	NaN	20.9258	21.32	NaN	NaN	NaN	21.4891	21.4862	20.4538	20.8926	NaN	K	2	___1	1	6.15002e-37
P54725-2;P54725-3;P54725;K7ENJ0;K7ELW1;P54727;Q5W0S5;Q5W0S4	P54725-2;P54727	UV excision repair protein RAD23 homolog A;UV excision repair protein RAD23 homolog B	RAD23A;RAD23B	IEAEKGRDAFPVAGQKLIYAGKILSDDVPIR;IESEKGKDAFPVAGQKLIYAGKILNDDTALK	45	NaN	NaN	NaN	23.7843	NaN	23.169	NaN	21.3996	NaN	NaN	22.8161	NaN	22.16	23.2707	K	2	___1	1	0.000525339
P54725-2;P54725-3;P54725;K7ENJ0;K7ELW1	P54725-2	UV excision repair protein RAD23 homolog A	RAD23A	MAVTITLKTLQQQTFKIRMEPDETVKVLKEK	16	NaN	20.9412	20.6888	21.9906	23.2477	22.0926	NaN	NaN	NaN	NaN	20.3262	NaN	NaN	NaN	K	2	___1	1	7.2714e-05
P54868-3;P54868-2;P54868	P54868-3	Hydroxymethylglutaryl-CoA synthase, mitochondrial	HMGCS2	LQYMIFHTPFCKMVQKSLARLMFNDFLSASS	255	NaN	NaN	20.5145	NaN	NaN	24.6862	20.6925	20.8961	NaN	24.1383	21.8633	20.814	24.1183	NaN	K	2	___1	1	0.0014511
P55072	P55072	Transitional endoplasmic reticulum ATPase	VCP	QELVQYPVEHPDKFLKFGMTPSKGVLFYGPP	505	NaN	NaN	21.2103	22.7311	22.8697	21.4247	22.2787	23.1752	NaN	21.8672	22.82	21.1801	22.5743	23.027	K	2	___1	1	0.0082005
P55081	P55081	Microfibrillar-associated protein 1	MFAP1	DRVTVQEREAEALKQKELEQEAKRMAEERRK	223	NaN	NaN	NaN	20.9827	NaN	NaN	NaN	NaN	NaN	NaN	NaN	NaN	NaN	NaN	K	2	___1	1	0.000392766
P55084;P55084-2;F5GZQ3	P55084	Trifunctional enzyme subunit beta, mitochondrial;3-ketoacyl-CoA thiolase	HADHB	KKAQDEGLLSDVVPFKVPGKDTVTKDNGIRP	268	19.9816	NaN	NaN	NaN	NaN	NaN	NaN	23.0697	NaN	NaN	NaN	NaN	NaN	NaN	K	2	___1	1	2.26703e-09
P55084;P55084-2;F5GZQ3;B5MD38	P55084	Trifunctional enzyme subunit beta, mitochondrial;3-ketoacyl-CoA thiolase	HADHB	TKDNGIRPSSLEQMAKLKPAFIKPYGTVTAA	291	25.578	22.6052	24.6422	23.0736	25.9192	26.4854	25.3107	26.9821	21.6351	26.8629	25.8022	23.7485	26.2384	26.9926	K	2	___1	1	1.71801e-16
P55084;P55084-2;F5GZQ3;B5MD38	P55084	Trifunctional enzyme subunit beta, mitochondrial;3-ketoacyl-CoA thiolase	HADHB	SDVVPFKVPGKDTVTKDNGIRPSSLEQMAKL	277	NaN	NaN	NaN	NaN	20.9934	22.9226	NaN	NaN	NaN	NaN	NaN	21.4159	21.0865	21.9879	K	3	___1	1	9.54031e-10
P55084;P55084-2;F5GZQ3	P55084	Trifunctional enzyme subunit beta, mitochondrial;3-ketoacyl-CoA thiolase	HADHB	IRHSRKMRKLMLDLNKAKSMGQRLSLISKFR	188	NaN	21.9045	23.1484	23.7191	24.6617	25.9636	25.3151	23.3893	23.107	24.3045	24.1068	25.1394	24.7723	26.1781	K	2	___1	1	0.000376446
P55084;P55084-2;F5GZQ3	P55084	Trifunctional enzyme subunit beta, mitochondrial;3-ketoacyl-CoA thiolase	HADHB	RLEQDEYALRSHSLAKKAQDEGLLSDVVPFK	253	NaN	NaN	23.3584	22.9557	NaN	24.8386	23.7318	23.9547	NaN	23.0157	NaN	25.1901	24.3079	25.219	K	2	___1	1	2.51201e-06
P55084;P55084-2;B5MD38;C9JEY0;C9JE81;C9K0M0	P55084	Trifunctional enzyme subunit beta, mitochondrial;3-ketoacyl-CoA thiolase	HADHB	VDGVRTPFLLSGTSYKDLMPHDLARAALTGL	72	27.1971	NaN	23.2311	24.2219	25.9413	25.6674	24.0816	28.202	23.6645	28.6717	27.4294	25.9047	26.5912	25.9942	K	3	___1	1	1.47531e-70
P55201-3;P55201;P55201-2	P55201-3	Peregrin	BRPF1	TPAHEVGRRTSVLFSKKNPKTAGPPKRPGRP	895	NaN	NaN	NaN	NaN	NaN	NaN	NaN	NaN	NaN	21.8287	21.9879	21.2905	22.0835	21.8274	K	2	___1	1	0.00645978
P55290;P55290-4;P55290-5	P55290	Cadherin-13	CDH13	LGASDKDLHPNTDPFKFEIHKQAVPDKVWKI	619	NaN	NaN	NaN	NaN	NaN	NaN	NaN	21.1378	NaN	NaN	NaN	NaN	NaN	NaN	K	3	___1	1	2.91555e-05
P55809	P55809	Succinyl-CoA:3-ketoacid coenzyme A transferase 1, mitochondrial	OXCT1	SPIKYNKDGSVAIASKPREVREFNGQHFILE	185	NaN	21.4585	21.9865	NaN	21.6985	NaN	22.7819	NaN	21.4945	NaN	NaN	23.6779	22.041	21.4917	K	2	___1	1	0.00181772
P55809;E9PDW2;P55809-2	P55809	Succinyl-CoA:3-ketoacid coenzyme A transferase 1, mitochondrial	OXCT1	LPLTGKQCVNRIITEKAVFDVDKKKGLTLIE	473	NaN	NaN	NaN	NaN	23.0379	NaN	NaN	20.3852	NaN	NaN	NaN	NaN	NaN	NaN	K	2	___1	1	4.82495e-05
P55809;E9PDW2;P55809-2	P55809	Succinyl-CoA:3-ketoacid coenzyme A transferase 1, mitochondrial	OXCT1	TMEHSAKGNAHKIMEKCTLPLTGKQCVNRII	455	NaN	NaN	NaN	19.6253	23.4857	22.2218	20.3051	NaN	22.0718	23.1322	23.0502	24.3124	24.2378	23.3795	K	2	___1	1	2.46013e-12
P56181-2	P56181-2	NADH dehydrogenase [ubiquinone] flavoprotein 3, mitochondrial	NDUFV3	QLQASPPGAAEGHLEKPVPEPQRKAAPPLPR	336	21.3573	NaN	NaN	NaN	NaN	NaN	NaN	23.3906	NaN	22.7121	20.4431	NaN	20.5216	NaN	K	4	___1	1	1.98089e-57
P56181-2	P56181-2	NADH dehydrogenase [ubiquinone] flavoprotein 3, mitochondrial	NDUFV3	KTLLQKPHVDITDPEKPHQPKKKGSPAKPSE	223	23.9774	NaN	NaN	NaN	NaN	NaN	NaN	NaN	NaN	23.4094	NaN	NaN	NaN	NaN	K	3	___1	1	1.10306e-18
P56381	P56381	ATP synthase subunit epsilon, mitochondrial	ATP5E	AVRDALKTEFKANAEKTSGSNVKIVKVKKE_	37	24.7951	NaN	20.8227	20.5564	NaN	22.3998	21.867	25.0652	21.483	22.0113	21.3913	21.1292	21.8148	22.5288	K	2	___1	1	7.3886e-05
P56381	P56381	ATP synthase subunit epsilon, mitochondrial	ATP5E	RQAGLSYIRYSQICAKAVRDALKTEFKANAE	21	24.7142	NaN	22.1494	22.7686	23.1463	23.2448	21.4316	25.2492	23.3226	25.2726	23.1407	NaN	24.6731	24.2336	K	2	___1	1	0.000130039
P56385	P56385	ATP synthase subunit e, mitochondrial	ATP5I	____MVPPVQVSPLIKLGRYSALFLGVAYGA	12	20.9082	NaN	NaN	NaN	NaN	NaN	NaN	21.6229	NaN	NaN	NaN	NaN	NaN	NaN	K	3	___1	1	0.000483319
P57078-2;P57078	P57078-2	Receptor-interacting serine/threonine-protein kinase 4	RIPK4	LHVDDRERMELLEEAKKMEMAKFRYILPVYG	71	28.4983	NaN	NaN	NaN	NaN	NaN	NaN	25.038	NaN	23.4493	NaN	NaN	NaN	NaN	K	2	___1	1	0.00136443
P60174-1;P60174;P60174-4;U3KPZ0;U3KQF3	P60174-1	Triosephosphate isomerase	TPI1	CIGEKLDEREAGITEKVVFEQTKVIADNVKD	142	25.3901	23.9039	26.2173	27.5579	27.0277	27.8076	27.3291	26.3075	26.6861	26.2195	27.3182	25.2541	26.6554	27.8686	K	2	___1	1	3.45684e-214
P60174-1;P60174	P60174-1	Triosephosphate isomerase	TPI1	QKLDPKIAVAAQNCYKVTNGAFTGEISPGMI	69	NaN	NaN	NaN	NaN	NaN	NaN	NaN	NaN	NaN	NaN	23.3264	NaN	23.9725	NaN	K	3	___1	1	5.84472e-40
P60174-1;P60174;P60174-4;U3KPZ0	P60174-1	Triosephosphate isomerase	TPI1	TGKTATPQQAQEVHEKLRGWLKSNVSDAVAQ	188	29.0306	27.98	27.7781	28.1634	28.3838	27.8076	27.235	29.6785	23.1749	28.584	28.9949	27.1419	27.6452	28.6321	K	2	___1	1	2.01017e-63
P60709;G5E9R0;E7EVS6;C9JZR7;C9JTX5;C9JUM1;P63261;I3L3I0;I3L1U9;K7EM38;I3L3R2;J3KT65;P68032;P62736;P63267;P68133;A6NL76;C9JFL5;F6UVQ4;F6QUT6;F8WB63;B8ZZJ2	P60709;P63261;P68032;P68133	Actin, cytoplasmic 1;Actin, cytoplasmic 1, N-terminally processed;Actin, cytoplasmic 2;Actin, cytoplasmic 2, N-terminally processed;Actin, alpha cardiac muscle 1;Actin, aortic smooth muscle;Actin, gamma-enteric smooth muscle;Actin, alpha skeletal muscle	ACTB;ACTG1;ACTC1;ACTA2;ACTG2;ACTA1	GMGQKDSYVGDEAQSKRGILTLKYPIEHGII;GMGQKDSYVGDEAQSKRGILTLKYPIEHGIV	63	29.9909	28.2615	28.6754	29.3581	28.606	29.3037	28.4749	30.3375	28.5091	28.5322	29.4403	28.0612	28.3539	28.8094	K	2	___1	1	8.22549e-23
P60709;P63261;P68032;P62736;P63267;P63267-2;P68133;A6NL76	P60709;P63261;P68032;P68133	Actin, cytoplasmic 1;Actin, cytoplasmic 1, N-terminally processed;Actin, cytoplasmic 2;Actin, cytoplasmic 2, N-terminally processed;Actin, alpha cardiac muscle 1;Actin, aortic smooth muscle;Actin, gamma-enteric smooth muscle;Actin, alpha skeletal muscle	ACTB;ACTG1;ACTC1;ACTA2;ACTG2;ACTA1	DRMQKEITALAPSTMKIKIIAPPERKYSVWI	328	31.3525	30.5171	31.4161	32.8743	32.1285	31.6908	31.7119	31.6678	31.1897	31.3552	32.0912	31.9142	32.0564	32.6027	K	2	___1	1	1.77134e-10
P60709;G5E9R0;E7EVS6;C9JZR7;C9JTX5;C9JUM1;P63261;I3L3I0;I3L1U9;K7EM38;I3L3R2;J3KT65;P68032;P62736;P63267;P68133;A6NL76;C9JFL5;F6UVQ4;F6QUT6;F8WB63;B8ZZJ2	P60709;P63261;P68032;P68133	Actin, cytoplasmic 1;Actin, cytoplasmic 1, N-terminally processed;Actin, cytoplasmic 2;Actin, cytoplasmic 2, N-terminally processed;Actin, alpha cardiac muscle 1;Actin, aortic smooth muscle;Actin, gamma-enteric smooth muscle;Actin, alpha skeletal muscle	ACTB;ACTG1;ACTC1;ACTA2;ACTG2;ACTA1	VGRPRHQGVMVGMGQKDSYVGDEAQSKRGIL	52	26.1558	NaN	NaN	21.6337	22.9496	21.8206	NaN	26.3626	22.2407	23.1336	22.7703	21.3415	19.3615	22.8001	K	3	___1	1	4.73427e-50
P60903	P60903	Protein S100-A10	S100A10	FPGFLENQKDPLAVDKIMKDLDQCRDGKVGF	54	19.7496	20.8682	NaN	22.5728	21.0699	20.8955	NaN	NaN	21.9002	NaN	21.9077	21.9152	22.4569	23.1792	K	2	___1	1	0.00422748
P60903	P60903	Protein S100-A10	S100A10	AMETMMFTFHKFAGDKGYLTKEDLRVLMEKE	23	22.9623	NaN	20.7628	22.1983	21.5875	20.3254	20.3695	21.8883	NaN	21.1661	21.5627	NaN	21.7714	22.1172	K	2	___1	1	0.00317769
P60903	P60903	Protein S100-A10	S100A10	DKGYLTKEDLRVLMEKEFPGFLENQKDPLAV	37	22.3223	22.5264	24.3996	24.8028	24.7446	24.3516	23.9432	23.3723	NaN	25.0433	25.3228	23.237	24.9094	24.9964	K	2	___1	1	8.14528e-75
P60953;Q5JYX0;P60953-1	P60953	Cell division control protein 42 homolog	CDC42	VGTQIDLRDDPSTIEKLAKNKQKPITPETAE	128	NaN	NaN	NaN	NaN	NaN	NaN	NaN	20.9726	NaN	NaN	NaN	NaN	NaN	NaN	K	2	___1	1	0.00450266
P61026	P61026	Ras-related protein Rab-10	RAB10	QIAREHGIRFFETSAKANINIEKAFLTLAED	154	NaN	NaN	NaN	NaN	21.2476	NaN	NaN	NaN	NaN	NaN	NaN	NaN	NaN	NaN	K	2	___1	1	4.65217e-05
P61081	P61081	NEDD8-conjugating enzyme Ubc12	UBE2M	________MIKLFSLKQQKKEEESAGGTKGS	8	NaN	NaN	21.1151	21.6005	22.2554	21.8868	20.8313	NaN	NaN	NaN	21.9131	21.7155	NaN	21.6233	K	2	___1	1	0.00165109
P61088;F8VSD4;F8VV71;F8VQQ8	P61088	Ubiquitin-conjugating enzyme E2 N	UBE2N	PKVRFMTKIYHPNVDKLGRICLDILKDKWSP	82	23.768	NaN	NaN	19.2206	21.0857	NaN	NaN	24.7149	NaN	NaN	21.2897	21.4177	20.8214	21.1216	K	3	___1	1	0.000209113
P61604;B8ZZL8;B8ZZ54	P61604	10 kDa heat shock protein, mitochondrial	HSPE1	SGSKGKGGEIQPVSVKVGDKVLLPEYGGTKV	66	25.479	26.0624	26.3131	25.8299	25.7282	26.8889	26.5524	26.6679	25.8343	27.8925	26.3008	26.2394	27.8304	27.2881	K	2	___1	1	2.57125e-05
P61604;B8ZZL8;B8ZZ54	P61604	10 kDa heat shock protein, mitochondrial	HSPE1	GKGGEIQPVSVKVGDKVLLPEYGGTKVVLDD	70	24.3233	23.5772	23.188	23.9857	24.8424	23.9805	NaN	25.1135	25.5434	24.7073	23.1828	26.1815	24.5404	25.0736	K	2	___1	1	0.000159551
P61604;B8ZZL8;S4R3N1	P61604	10 kDa heat shock protein, mitochondrial	HSPE1;HSPE1-MOB4	SAAETVTKGGIMLPEKSQGKVLQATVVAVGS	36	NaN	NaN	22.8738	21.9676	23.8823	NaN	22.2084	NaN	NaN	20.8531	22.9344	23.2578	23.2747	23.5598	K	2	___1	1	0.0028325
P61604;B8ZZL8;S4R3N1	P61604	10 kDa heat shock protein, mitochondrial	HSPE1;HSPE1-MOB4	________MAGQAFRKFLPLFDRVLVERSAA	8	NaN	NaN	22.6489	22.174	NaN	22.5632	NaN	22.3547	NaN	25.1327	24.4136	23.2881	24.3467	23.761	K	2	___1	1	0.00158703
P61604;B8ZZ54	P61604	10 kDa heat shock protein, mitochondrial	HSPE1	VLLPEYGGTKVVLDDKDYFLFRDGDILGKYV	86	24.3993	NaN	NaN	NaN	NaN	NaN	NaN	24.7515	NaN	26.0086	23.7338	21.189	20.7433	NaN	K	2	___1	1	1.73329e-10
P61956-2;P61956;A8MUA9;A8MU27;Q6EEV6;P55854;P55854-2	P61956-2	Small ubiquitin-related modifier 2;Small ubiquitin-related modifier 4;Small ubiquitin-related modifier 3	SUMO2;SUMO3;SUMO4	INLKVAGQDGSVVQFKIKRHTPLSKLMKAYC	33	NaN	20.1888	20.2905	21.9782	21.3978	NaN	21.3072	NaN	NaN	NaN	21.7547	22.372	22.0271	NaN	K	2	___1	1	4.06076e-11
P61970;H3BRV9	P61970	Nuclear transport factor 2	NUTF2	TWEGQQFQGKAAIVEKLSSLPFQKIQHSITA	55	22.5648	NaN	24.1917	24.5259	24.7865	23.0688	22.991	23.9206	NaN	24.9469	25.4702	NaN	24.4054	NaN	K	2	___1	1	4.99654e-21
P61981	P61981	14-3-3 protein gamma;14-3-3 protein gamma, N-terminally processed	YWHAG	VATGEKRATVVESSEKAYSEAHEISKEHMQP	152	NaN	NaN	21.4427	23.32	24.5725	22.0143	NaN	NaN	NaN	23.1699	23.0079	NaN	21.3693	22.849	K	3	___1	1	2.0387e-14
P61981	P61981	14-3-3 protein gamma;14-3-3 protein gamma, N-terminally processed	YWHAG	______MVDREQLVQKARLAEQAERYDDMAA	10	NaN	NaN	22.4146	22.9009	23.6854	23.1542	22.5862	23.1832	20.9471	23.0358	23.6492	NaN	23.447	22.9307	K	2	___1	1	2.55816e-17
P61981	P61981	14-3-3 protein gamma;14-3-3 protein gamma, N-terminally processed	YWHAG	KGDYYRYLAEVATGEKRATVVESSEKAYSEA	142	NaN	NaN	22.3063	22.8701	NaN	23.2874	22.7878	NaN	NaN	21.8534	22.9306	NaN	21.8061	21.209	K	2	___1	1	0.000862345
P62328	P62328	Thymosin beta-4;Hematopoietic system regulatory peptide	TMSB4X	EKFDKSKLKKTETQEKNPLPSKETIEQEKQA	26	22.3954	NaN	NaN	20.9733	21.409	NaN	NaN	21.689	NaN	NaN	21.3395	23.2798	19.6856	20.3115	K	2	___1	1	4.75858e-12
P62328	P62328	Thymosin beta-4;Hematopoietic system regulatory peptide	TMSB4X	____MSDKPDMAEIEKFDKSKLKKTETQEKN	12	NaN	NaN	NaN	21.2132	21.0941	NaN	NaN	NaN	NaN	NaN	20.982	22.8651	NaN	21.315	K	2	___1	1	2.4592e-05
P62805;Q99525	P62805	Histone H4;Histone H4-like protein type G	HIST1H4A;HIST1H4G	___MSGRGKGGKGLGKGGAKRHRKVLRDNIQ	13	NaN	NaN	NaN	21.8673	NaN	20.9688	NaN	NaN	NaN	NaN	NaN	21.3633	NaN	NaN	K	2	___1	1	0.00157391
P62805	P62805	Histone H4	HIST1H4A	AKRKTVTAMDVVYALKRQGRTLYGFGG____	92	22.3282	NaN	NaN	21.579	22.7642	21.9079	NaN	22.5071	NaN	23.1773	23.5505	NaN	22.0525	NaN	K	2	___1	1	3.03035e-08
P62807;U3KQK0;Q99880;Q99877;Q93079;P58876;Q99879;Q96A08;Q16778;Q8N257;P23527;P33778;Q5QNW6;Q5QNW6-2	P62807;Q16778;Q5QNW6	Histone H2B type 1-C/E/F/G/I;Histone H2B;Histone H2B type 1-L;Histone H2B type 1-N;Histone H2B type 1-H;Histone H2B type 1-D;Histone H2B type 1-M;Histone H2B type 1-A;Histone H2B type 2-E;Histone H2B type 3-B;Histone H2B type 1-O;Histone H2B type 1-B;Histone H2B type 2-F	HIST1H2BC;HIST1H2BN;HIST1H2BL;HIST1H2BH;HIST1H2BD;HIST1H2BM;HIST1H2BA;HIST2H2BE;HIST3H2BB;HIST1H2BO;HIST1H2BB;HIST2H2BF	ELAKHAVSEGTKAVTKYTSSK__________	121	26.6559	NaN	22.7261	24.0608	23.2526	22.9468	23.523	25.7625	22.4669	23.3262	24.0898	22.5479	21.9219	22.6375	K	2	___1	1	0.000363379
P62826;J3KQE5;F5H018;B5MDF5;H0YFC6	P62826	GTP-binding nuclear protein Ran	RAN	GKTTFVKRHLTGEFEKKYVATLGVEVHPLVF	37	NaN	NaN	NaN	NaN	NaN	NaN	NaN	21.7078	NaN	NaN	NaN	NaN	NaN	NaN	K	2	___1	1	0.00421761
P62906	P62906	60S ribosomal protein L10a	RPL10A	EAKAVDIPHMDIEALKKLNKNKKLVKKLAKK	91	NaN	20.2143	NaN	NaN	NaN	NaN	NaN	21.4611	NaN	NaN	NaN	NaN	NaN	NaN	K	3	___1	1	0.000170368
P62937;F8WE65;C9J5S7	P62937	Peptidyl-prolyl cis-trans isomerase A;Peptidyl-prolyl cis-trans isomerase A, N-terminally processed;Peptidyl-prolyl cis-trans isomerase	PPIA	VPKTAENFRALSTGEKGFGYKGSCFHRIIPG	44	NaN	NaN	24.6474	25.7109	25.2428	25.2738	24.3571	25.3247	24.2069	24.9204	25.6986	22.1687	25.573	25.4035	K	2	___1	1	5.22323e-12
P62937;F8WE65;C9J5S7;P62937-2	P62937	Peptidyl-prolyl cis-trans isomerase A;Peptidyl-prolyl cis-trans isomerase A, N-terminally processed;Peptidyl-prolyl cis-trans isomerase	PPIA	FTRHNGTGGKSIYGEKFEDENFILKHTGPGI	82	22.9691	NaN	NaN	NaN	NaN	NaN	NaN	NaN	NaN	NaN	NaN	NaN	NaN	NaN	K	3	___1	1	3.73269e-05
P62937;F8WE65;C9J5S7	P62937	Peptidyl-prolyl cis-trans isomerase A;Peptidyl-prolyl cis-trans isomerase A, N-terminally processed;Peptidyl-prolyl cis-trans isomerase	PPIA	DGEPLGRVSFELFADKVPKTAENFRALSTGE	28	25.4539	26.2894	25.9024	27.3408	22.985	25.5	22.9592	25.1788	23.9047	26.6999	26.2484	24.1512	24.8564	25.8216	K	2	___1	1	1.36454e-06
P62942;Q5W0X3;A0A087WZM5;Q1JUQ5;Q5VVH2	P62942	Peptidyl-prolyl cis-trans isomerase FKBP1A;Peptidyl-prolyl cis-trans isomerase	FKBP1A;FKBP12-Exip2;FKBP1C	DGKKFDSSRDRNKPFKFMLGKQEVIRGWEEG	48	22.891	NaN	NaN	22.233	23.2134	21.919	NaN	23.8918	NaN	23.6189	23.3762	22.4716	22.2117	22.8082	K	2	___1	1	0.00168121
P62993;J3KT38;J3QRL5;P62993-2	P62993	Growth factor receptor-bound protein 2	GRB2	AKYDFKATADDELSFKRGDILKVLNEECDQN	20	NaN	NaN	NaN	NaN	20.8575	NaN	NaN	NaN	NaN	NaN	NaN	NaN	NaN	NaN	K	2	___1	1	0.00193361
P62993;P62993-2	P62993	Growth factor receptor-bound protein 2	GRB2	DFSLSVKFGNDVQHFKVLRDGAGKYFLWVVK	109	20.7732	NaN	NaN	NaN	NaN	NaN	NaN	21.7494	NaN	NaN	NaN	NaN	NaN	NaN	K	3	___1	1	0.000150673
P63104;E7EX29;E7ESK7;E5RGE1;E5RIR4;E9PD24;E7EVZ2	P63104	14-3-3 protein zeta/delta	YWHAZ	_______MDKNELVQKAKLAEQAERYDDMAA	9	22.3511	NaN	21.8634	23.0466	22.3896	22.871	22.476	23.466	NaN	21.7972	22.9806	NaN	22.3595	21.6799	K	2	___1	1	0.00525447
P63241;I3L397;I3L504;P63241-2;F8WCJ1;C9J7B5;C9J4W5;Q9GZV4	P63241	Eukaryotic translation initiation factor 5A-1;Eukaryotic translation initiation factor 5A;Eukaryotic translation initiation factor 5A-2	EIF5A;EIF5A2	VLKGRPCKIVEMSTSKTGKHGHAKVHLVGID	47	NaN	NaN	NaN	NaN	NaN	NaN	NaN	NaN	NaN	NaN	NaN	19.6493	NaN	NaN	K	2	___1	1	0.00147746
P63241;I3L397;I3L504;P63241-2;F8WCJ1;C9J7B5;C9J4W5;Q9GZV4;Q6IS14	P63241	Eukaryotic translation initiation factor 5A-1;Eukaryotic translation initiation factor 5A;Eukaryotic translation initiation factor 5A-2;Eukaryotic translation initiation factor 5A-1-like	EIF5A;EIF5A2;EIF5AL1	GHAKVHLVGIDIFTGKKYEDICPSTHNMDVP	67	20.1645	NaN	NaN	NaN	NaN	NaN	NaN	22.189	NaN	NaN	NaN	NaN	NaN	NaN	K	3	___1	1	0.00696745
P67936;K7EMU5;K7EPV9;K7EPB9;P67936-2	P67936;P67936-2	Tropomyosin alpha-4 chain	TPM4	KNVTNNLKSLEAASEKYSEKEDKYEEEIKLL	213	NaN	21.4784	21.7704	24.4094	24.2052	23.6761	NaN	NaN	21.1338	21.8545	23.6214	24.4048	21.8538	23.6125	K	2	___1	1	0.00706908
P68032;P62736;P63267;P63267-2;P68133	P68032;P68133	Actin, alpha cardiac muscle 1;Actin, aortic smooth muscle;Actin, gamma-enteric smooth muscle;Actin, alpha skeletal muscle	ACTC1;ACTA2;ACTG2;ACTA1	FVTTAEREIVRDIKEKLCYVALDFENEMATA	217	19.8225	NaN	NaN	22.3657	NaN	NaN	NaN	23.9335	NaN	24.7911	25.7989	24.1964	NaN	21.8448	K	3	___1	1	2.33696e-164
P68104;A0A087WVQ9;P68104-2;Q5VTE0;A0A087WV01;Q5JR01;A6PW80;Q05639	P68104;Q05639	Elongation factor 1-alpha 1;Putative elongation factor 1-alpha-like 3;Elongation factor 1-alpha;Elongation factor 1-alpha 2	EEF1A1;EEF1A1P5;EEF1A2	YKCGGIDKRTIEKFEKEAAEMGKGSFKYAWV	44	23.5837	22.0145	21.5672	23.5244	21.8324	20.8796	20.7984	23.5746	NaN	NaN	22.6694	21.5651	21.3349	22.1749	K	2	___1	1	0.00272343
P68104;A0A087WVQ9;P68104-2;Q5VTE0;Q05639	P68104;Q05639	Elongation factor 1-alpha 1;Putative elongation factor 1-alpha-like 3;Elongation factor 1-alpha 2	EEF1A1;EEF1A1P5;EEF1A2	RPTDKPLRLPLQDVYKIGGIGTVPVGRVETG	255	25.255	NaN	24.2676	25.0314	25.6478	NaN	22.0045	24.5871	NaN	NaN	25.5984	25.0566	24.5342	24.5106	K	2	___1	1	1.65915e-106
P68363;P68363-2;Q71U36;Q71U36-2;Q13748;Q13748-2;Q6PEY2;Q9BQE3;F5H5D3;A0A1W2PQM2	P68363;Q71U36;Q9BQE3	Tubulin alpha-1B chain;Tubulin alpha-1A chain;Tubulin alpha-3C/D chain;Tubulin alpha-3E chain;Tubulin alpha-1C chain	TUBA1B;TUBA1A;TUBA3C;TUBA3E;TUBA1C	GDVVPKDVNAAIATIKTKRSIQFVDWCPTGF;GDVVPKDVNAAIATIKTKRTIQFVDWCPTGF	336	21.4089	19.9072	20.3198	20.4545	21.6432	20.9708	NaN	21.3379	NaN	21.9785	19.8926	NaN	20.7269	21.2813	K	2	___1	1	0.00145545
P68366-2;P68366	P68366-2	Tubulin alpha-4A chain	TUBA4A	GDVVPKDVNAAIAAIKTKRSIQFVDWCPTGF	321	19.4654	NaN	21.6934	23.4933	23.0459	23.2408	22.5625	22.2478	21.9241	NaN	22.5311	NaN	22.3464	22.5961	K	2	___1	1	0.00108722
P68402;J3KNE3	P68402	Platelet-activating factor acetylhydrolase IB subunit beta	PAFAH1B2	LPRGEKPNPLRQKNAKVNQLLKVSLPKLANV	155	21.3044	22.4409	20.8778	21.0221	NaN	21.2508	21.221	22.2301	NaN	NaN	22.0696	22.3098	22.2873	22.0248	K	2	___1	1	0.00454822
P68402;J3KNE3	P68402	Platelet-activating factor acetylhydrolase IB subunit beta	PAFAH1B2	PNPLRQKNAKVNQLLKVSLPKLANVQLLDTD	161	NaN	NaN	NaN	NaN	NaN	NaN	NaN	NaN	NaN	NaN	NaN	22.6541	NaN	NaN	K	2	___1	1	0.0044262
P68871	P68871	Hemoglobin subunit beta;LVV-hemorphin-7;Spinorphin	HBB	NLKGTFATLSELHCDKLHVDPENFRLLGNVL	96	25.5539	23.1185	NaN	NaN	NaN	NaN	NaN	28.0742	NaN	NaN	22.9954	23.4018	NaN	NaN	K	4	___1	1	1.81821e-69
P68871;F8W6P5;A0A0J9YWK4	P68871	Hemoglobin subunit beta;LVV-hemorphin-7;Spinorphin	HBB	_______MVHLTPEEKSAVTALWGKVNVDEV	9	26.3289	NaN	NaN	NaN	NaN	NaN	NaN	22.8405	NaN	NaN	NaN	NaN	NaN	NaN	K	3	___1	1	6.33336e-12
P69905	P69905	Hemoglobin subunit alpha	HBA1	________MVLSPADKTNVKAAWGKVGAHAG	8	32.3989	32.3312	31.9681	32.6272	27.5133	31.7709	30.8215	31.1997	32.1019	30.1946	32.521	31.4344	32.6224	32.6213	K	3	___1	1	5.3714e-05
P78417;Q5TA02;P78417-3	P78417	Glutathione S-transferase omega-1	GSTO1	EDYAGLKEEFRKEFTKLEEVLTNKKTTFFGG	152	NaN	NaN	NaN	NaN	24.7665	NaN	NaN	23.5506	NaN	24.2398	NaN	NaN	NaN	NaN	K	2	___1	1	2.33906e-38
P78417;Q5TA02;P78417-3	P78417	Glutathione S-transferase omega-1	GSTO1	EFRKEFTKLEEVLTNKKTTFFGGNSISMIDY	160	26.6816	26.7748	26.4079	27.2831	26.3559	25.6234	25.4261	26.2559	25.9348	25.6589	25.9908	27.3641	24.8344	26.8405	K	2	___1	1	0.000200141
P78417;Q5TA02;P78417-3;P78417-2;Q5TA01	P78417	Glutathione S-transferase omega-1	GSTO1	RLEAMKLNECVDHTPKLKLWMAAMKEDPTVS	198	NaN	NaN	NaN	20.4792	NaN	NaN	NaN	23.3608	20.4222	19.6215	22.1888	22.4287	20.4826	22.3376	K	3	___1	1	0.000130961
P81605;P81605-2	P81605	Dermcidin;Survival-promoting peptide;DCD-1	DCD	RQAPKPRKQRSSLLEKGLDGAKKAVGGLGKL	68	25.2695	23.1444	24.1273	24.5616	24.3011	23.7881	23.4103	24.8823	24.6038	22.7067	24.4129	23.26	24.3202	24.6263	K	2	___1	1	0.000266821
P82909	P82909	28S ribosomal protein S36, mitochondrial	MRPS36	MGSKMASASRVVQVVKPHTPLIRFPDRRDNP	17	NaN	NaN	NaN	NaN	NaN	NaN	NaN	NaN	NaN	NaN	NaN	21.6128	NaN	NaN	K	3	___1	1	0.00271204
P82933	P82933	28S ribosomal protein S9, mitochondrial	MRPS9	SEGKRKTAKAEAIVYKHGSGRIKVNGIDYQL	287	NaN	NaN	19.7891	NaN	21.2941	NaN	NaN	NaN	21.2084	NaN	19.6285	NaN	NaN	NaN	K	3	___1	1	4.04011e-05
P83111;P83111-2	P83111	Serine beta-lactamase-like protein LACTB, mitochondrial	LACTB	GYTLLAAIVERASGCKYLDYMQKIFHDLDML	342	NaN	NaN	NaN	NaN	NaN	NaN	NaN	NaN	NaN	NaN	21.0195	NaN	19.3688	20.9789	K	2	___1	1	0.00341837
Q00325-2;Q00325;F8VVM2	Q00325-2	Phosphate carrier protein, mitochondrial	SLC25A3	TLRDAAPKMYKEEGLKAFYKGVAPLWMRQIP	213	24.6335	NaN	NaN	20.344	21.8396	22.8953	NaN	24.723	24.0764	23.3644	22.2113	22.1502	23.4307	23.2704	K	2	___1	1	0.00347726
Q00325-2;Q00325	Q00325-2	Phosphate carrier protein, mitochondrial	SLC25A3	SVLNKEKGSSASLVLKRLGFKGVWKGLFARI	303	22.1086	NaN	23.1493	21.1872	22.4176	NaN	23.9295	24.4429	21.9049	23.6004	23.6343	23.1848	24.272	23.2196	K	2	___1	1	0.00194943
Q00325-2;Q00325;F8VVM2;F8VWQ0;F8VZL5;F8VWR4	Q00325-2	Phosphate carrier protein, mitochondrial	SLC25A3	VPLDLVKCRMQVDPQKYKGIFNGFSVTLKED	98	NaN	NaN	NaN	NaN	NaN	21.1345	20.488	23.3452	NaN	NaN	NaN	NaN	NaN	NaN	K	2	___1	1	0.00282743
Q00325-2;Q00325;F8VVM2	Q00325-2	Phosphate carrier protein, mitochondrial	SLC25A3	PGYANTLRDAAPKMYKEEGLKAFYKGVAPLW	208	21.8296	NaN	NaN	19.6222	NaN	20.8314	21.2097	23.3606	20.7768	22.3651	20.4941	20.3225	22.4587	22.5927	K	2	___1	1	0.00404166
Q00325-2;Q00325;F8VVM2	Q00325-2	Phosphate carrier protein, mitochondrial	SLC25A3	MMKFACFERTVEALYKFVVPKPRSECSKPEQ	246	20.6407	NaN	NaN	NaN	NaN	NaN	NaN	22.7727	NaN	NaN	NaN	NaN	NaN	NaN	K	2	___1	1	4.2596e-05
Q00688	Q00688	Peptidyl-prolyl cis-trans isomerase FKBP3	FKBP3	NKDHLVTAYNHLFETKRFKGTESISKVSEQV	70	22.2944	NaN	NaN	NaN	NaN	NaN	NaN	24.2961	NaN	NaN	NaN	NaN	NaN	NaN	K	3	___1	1	0.00010281
Q00688	Q00688	Peptidyl-prolyl cis-trans isomerase FKBP3	FKBP3	GTESISKVSEQVKNVKLNEDKPKETKSEETL	89	22.3096	NaN	NaN	NaN	NaN	NaN	NaN	23.0595	NaN	NaN	NaN	NaN	NaN	NaN	K	3	___1	1	0.0035415
Q00688	Q00688	Peptidyl-prolyl cis-trans isomerase FKBP3	FKBP3	QTSAKKKKNAKPLSFKVGVGKVIRGWDEALL	165	NaN	NaN	NaN	23.0241	22.8103	22.1116	22.3138	NaN	NaN	21.7558	22.1749	21.5001	22.5714	22.9784	K	2	___1	1	0.00233526
Q00765	Q00765	Receptor expression-enhancing protein 5	REEP5	TKEAKKATVNLLGEEKKST____________	186	NaN	NaN	21.2157	22.4847	22.5299	22.4413	21.942	21.7391	NaN	NaN	NaN	20.2327	21.5093	23.0118	K	2	___1	1	2.00309e-06
Q00872-10;Q00872-3;Q00872;Q00872-6;F8VZY0;Q00872-9;Q00872-8;F8VZE0;Q00872-5;Q00872-7;G3V1V7;Q00872-4;Q00872-2	Q00872-10;Q00872-4	Myosin-binding protein C, slow-type	MYBPC1	TEDWIVANKDLIDKTKFTITGLPTDAKIFVR	801	22.2865	22.7367	27.904	28.5899	28.0361	28.9014	28.3779	27.0864	25.3601	28.328	28.5476	24.0217	27.7787	28.5444	K	2	___1	1	1.66905e-29
Q00872-10;Q00872-3;Q00872;Q00872-6;F8VZY0;Q00872-9;Q00872-8;F8VZE0;Q00872-5;Q00872-7;G3V1V7;Q00872-4;Q00872-2	Q00872-10;Q00872-4	Myosin-binding protein C, slow-type	MYBPC1	PLTDQTVNLGKEICLKCEISENIPGKWTKNG	478	23.8435	NaN	NaN	NaN	NaN	NaN	NaN	22.722	NaN	24.8581	24.4665	NaN	22.96	24.9264	K	2	___1	1	1.57961e-62
Q00872-10;Q00872-3;Q00872;Q00872-6;F8VZY0;Q00872-9;Q00872-8;F8VZE0;Q00872-5;Q00872-7;G3V1V7;Q00872-4;Q00872-2	Q00872-10;Q00872-4	Myosin-binding protein C, slow-type	MYBPC1	IDKTKFTITGLPTDAKIFVRVKAVNAAGASE	812	21.8967	NaN	22.717	24.3255	24.0666	22.8093	21.9224	22.0587	NaN	NaN	24.6076	NaN	23.3301	23.4794	K	2	___1	1	2.28171e-05
Q00872-10;Q00872-3;Q00872;Q00872-6;F8VZY0;Q00872-9;Q00872-8;F8VZE0;Q00872-5;Q00872-7;G3V1V7;Q00872-4;Q00872-2	Q00872-10;Q00872-4	Myosin-binding protein C, slow-type	MYBPC1	SAAFAKILDPAYQVDKGGRVRFVVELADPKL	291	22.1441	NaN	NaN	NaN	22.2092	NaN	NaN	22.3249	23.7473	NaN	NaN	NaN	NaN	23.9319	K	2	___1	1	8.37078e-09
Q00872-10;Q00872-3;Q00872;Q00872-6;F8VZY0;Q00872-9;Q00872-8;F8VZE0;Q00872-5;Q00872-7;G3V1V7;Q00872-4;Q00872-2	Q00872-10;Q00872-4	Myosin-binding protein C, slow-type	MYBPC1	MTTGGQSSAKLSVDLKPLKILTPLTDQTVNL	456	24.8203	NaN	24.5882	26.413	26.501	26.814	27.0184	25.2479	24.8628	25.2556	25.8895	24.0002	25.266	26.6433	K	2	___1	1	0.00259726
Q00872-10;Q00872-3;Q00872;Q00872-6;F8VZY0;Q00872-9;Q00872-8;F8VZE0;Q00872-5;Q00872-7;G3V1V7;Q00872-4;Q00872-2	Q00872-10;Q00872-4	Myosin-binding protein C, slow-type	MYBPC1	GGQSSAKLSVDLKPLKILTPLTDQTVNLGKE	459	21.8405	NaN	NaN	NaN	NaN	NaN	NaN	22.4449	NaN	NaN	NaN	NaN	NaN	NaN	K	3	___1	1	1.94607e-09
Q00872-10;Q00872-3;Q00872;Q00872-6;F8VZY0;Q00872-9;Q00872-8;F8VZE0;Q00872-5;Q00872-7;G3V1V7;Q00872-4;Q00872-2	Q00872-10;Q00872-4	Myosin-binding protein C, slow-type	MYBPC1	HINLKNEAGEAHASIKVKVVDFPDPPVAPTV	638	NaN	NaN	NaN	21.3975	NaN	21.0585	NaN	NaN	NaN	NaN	NaN	NaN	NaN	NaN	K	3	___1	1	0.00605498
Q00872-10;Q00872-3;Q00872;Q00872-6;F8VZY0;Q00872-9;Q00872-8;F8VZE0;Q00872-5;Q00872-7;G3V1V7;Q00872-4;Q00872-2	Q00872-10;Q00872-4	Myosin-binding protein C, slow-type	MYBPC1	EVKWYKNGQEIRPSTKYIFEHKGCQRILFIN	322	23.5128	NaN	NaN	NaN	NaN	NaN	NaN	23.6704	NaN	23.2052	22.8868	NaN	21.9938	22.7178	K	3	___1	1	0.00399077
Q00872-10;Q00872-3;Q00872;Q00872-6;F8VZY0;Q00872-9;Q00872-8;F8VZE0;Q00872-5;Q00872-7;Q00872-4;Q00872-2	Q00872-10;Q00872-4	Myosin-binding protein C, slow-type	MYBPC1	AKQNANSQLSILFIEKPQGGTVKVGEDITFI	88	21.6116	NaN	NaN	NaN	NaN	NaN	NaN	21.3144	NaN	NaN	NaN	NaN	NaN	NaN	K	3	___1	1	4.74051e-15
Q00872-10;Q00872-3;Q00872;Q00872-6;F8VZY0;Q00872-8;F8VZE0;Q00872-5;Q00872-7;G3V1V7;F8W1Z9;Q00872-4;Q00872-2	Q00872-10;Q00872-4	Myosin-binding protein C, slow-type	MYBPC1	EGQEDAGELDFSGLLKRREVKQQEEEPQVDV	220	22.4374	NaN	NaN	NaN	NaN	NaN	NaN	23.253	NaN	NaN	NaN	NaN	NaN	NaN	K	3	___1	1	3.0939e-33
Q00872-10;Q00872-3;Q00872;Q00872-6;F8VZY0;Q00872-9;Q00872-8;F8VZE0;Q00872-5;Q00872-7;Q00872-4;Q00872-2	Q00872-10;Q00872-4	Myosin-binding protein C, slow-type	MYBPC1	QGGTVKVGEDITFIAKVKAEDLLRKPTIKWF	105	19.9731	NaN	NaN	NaN	24.7896	23.3303	23.6372	NaN	NaN	22.8041	23.2866	NaN	23.9088	23.9169	K	2	___1	1	3.26838e-12
Q02218;E9PCR7;A0A0D9SFS3;E9PDF2;Q02218-2;E9PFG7;Q02218-3	Q02218	2-oxoglutarate dehydrogenase, mitochondrial	OGDH	GKTKAEQFYCGDTEGKKVMSILLHGDAAFAG	401	23.925	NaN	NaN	NaN	NaN	NaN	NaN	23.8096	21.6809	22.2054	22.1785	21.8282	22.681	22.3405	K	2	___1	1	4.89547e-07
Q02218;E9PCR7;A0A0D9SFS3;E9PDF2;Q02218-2;E9PFG7	Q02218	2-oxoglutarate dehydrogenase, mitochondrial	OGDH	WCQEEHKNQGYYDYVKPRLRTTISRAKPVWY	970	NaN	22.058	21.5288	21.675	21.3698	NaN	NaN	24.3438	23.0613	22.3953	22.7146	22.7884	23.4736	20.7581	K	2	___1	1	0.000552737
Q02218;E9PCR7;A0A0D9SFS3;E9PDF2;Q02218-2;E9PFG7;Q02218-3	Q02218	2-oxoglutarate dehydrogenase, mitochondrial	OGDH	EGCEVLIPALKTIIDKSSENGVDYVIMGMPH	296	NaN	NaN	NaN	NaN	NaN	NaN	NaN	22.1877	NaN	NaN	NaN	NaN	NaN	NaN	K	3	___1	1	1.36834e-06
Q02218;E9PCR7;A0A0D9SFS3;E9PDF2;Q02218-2;E9PFG7	Q02218	2-oxoglutarate dehydrogenase, mitochondrial	OGDH	VIPEDGPAAQNPENVKRLLFCTGKVYYDLTR	899	22.6383	23.5371	23.7258	23.8875	24.502	25.2472	23.5972	23.725	23.7587	23.9494	23.1504	24.2816	25.0722	24.6204	K	2	___1	1	1.75403e-41
Q02218;E9PCR7;A0A0D9SFS3;E9PDF2;Q02218-2;E9PFG7	Q02218	2-oxoglutarate dehydrogenase, mitochondrial	OGDH	VVNQPEYEEEISKYDKICEEAFARSKDEKIL	564	NaN	NaN	NaN	NaN	NaN	NaN	NaN	21.3141	20.3193	NaN	NaN	NaN	NaN	NaN	K	2	___1	1	0.000538873
Q02252-2;Q02252	Q02252-2	Methylmalonate-semialdehyde dehydrogenase [acylating], mitochondrial	ALDH6A1	PQATKAEMDAAIASCKRAFPAWADTSVLSRQ	87	NaN	NaN	NaN	NaN	NaN	NaN	NaN	NaN	NaN	20.4243	21.9294	20.6224	21.9276	21.5886	K	2	___1	1	1.00812e-05
Q02252-2;Q02252	Q02252-2	Methylmalonate-semialdehyde dehydrogenase [acylating], mitochondrial	ALDH6A1	WADTSVLSRQQKEIAKLITLEQGKTLADAEG	108	21.9387	24.4999	23.7325	24.7646	25.8291	25.3819	24.6301	22.8999	23.8257	NaN	NaN	25.5328	NaN	25.731	K	2	___1	1	5.01137e-12
Q02252-2;Q02252	Q02252-2	Methylmalonate-semialdehyde dehydrogenase [acylating], mitochondrial	ALDH6A1	SFSSSVPTVKLFIGGKFVESKSDKWIDIHNP	47	NaN	25.9884	25.4245	26.1157	26.5502	26.9595	26.383	23.7322	25.9398	26.1757	27.0781	26.5197	27.2713	26.0773	K	2	___1	1	0.000532843
Q03252	Q03252	Lamin-B2	LMNB2	ALELENDRLLLKISEKEEVTTREVSGIKALY	81	21.6702	21.1429	19.8757	22.7112	21.6038	21.9147	21.4181	21.9272	20.2333	NaN	22.8105	20.283	21.3063	NaN	K	2	___1	1	0.00461756
Q03252	Q03252	Lamin-B2	LMNB2	DETARERARLQIEIGKLRAELDEVNKSAKKR	123	NaN	NaN	22.6657	24.305	22.4704	24.4696	24.3061	NaN	NaN	22.1703	24.1846	NaN	23.5706	22.3712	K	2	___1	1	0.000392766
Q03252	Q03252	Lamin-B2	LMNB2	AKAEDGHAVAKKQLEKETLMRVDLENRCQSL	200	NaN	NaN	NaN	22.2327	NaN	20.17	NaN	NaN	21.3572	NaN	21.9498	20.679	21.3641	21.2804	K	2	___1	1	0.0013016
Q04446;E9PGM4	Q04446	1,4-alpha-glucan-branching enzyme	GBE1	SQILKNIGENEGGIDKFSRGYESFGVHRCAD	68	21.2339	NaN	NaN	20.1371	22.2524	21.1323	NaN	23.2164	NaN	21.1582	NaN	NaN	NaN	21.7155	K	2	___1	1	3.12856e-20
Q04446;E9PGM4	Q04446	1,4-alpha-glucan-branching enzyme	GBE1	SKSYTDYRVGTALPGKFKIVLDSDAAEYGGH	645	23.7858	24.0508	22.157	21.5142	24.703	24.3889	23.8529	24.1064	NaN	23.3679	24.1585	22.5788	24.3706	24.8996	K	2	___1	1	0.00271827
Q04446;E9PGM4	Q04446	1,4-alpha-glucan-branching enzyme	GBE1	ARRQFHLTDDDLLRYKFLNNFDRDMNRLEER	578	20.6447	NaN	NaN	NaN	NaN	NaN	NaN	22.1729	NaN	NaN	NaN	NaN	NaN	NaN	K	2	___1	1	0.00822099
Q04760-2;Q04760	Q04760-2	Lactoylglutathione lyase	GLO1	PDVYSACKRFEELGVKFVKKPDDGKMKGLAF	133	20.9309	NaN	25.015	25.8582	24.8181	25.6516	24.8932	24.1377	NaN	25.6148	26.3261	25.5386	25.4188	25.6648	K	3	___1	1	0.000584729
Q04760-2;Q04760	Q04760-2	Lactoylglutathione lyase	GLO1	FGHIGIAVPDVYSACKRFEELGVKFVKKPDD	125	22.3924	NaN	NaN	NaN	NaN	NaN	NaN	22.5823	NaN	NaN	NaN	NaN	NaN	NaN	K	3	___1	1	5.78075e-09
Q05639	Q05639	Elongation factor 1-alpha 2	EEF1A2	EKIDRRSGKKLEDNPKSLKSGDAAIVEMVPG	392	NaN	NaN	21.1336	20.9456	NaN	20.7496	20.2072	NaN	20.544	22.4308	20.6031	NaN	20.7867	22.0442	K	2	___1	1	0.000635836
Q05639	Q05639	Elongation factor 1-alpha 2	EEF1A2	VGVNKMDSTEPAYSEKRYDEIVKEVSAYIKK	165	21.6404	NaN	NaN	NaN	NaN	NaN	NaN	23.0507	NaN	NaN	NaN	NaN	NaN	NaN	K	2	___1	1	2.98684e-10
Q06830;A0A0A0MSI0	Q06830	Peroxiredoxin-1	PRDX1	APNFKATAVMPDGQFKDISLSDYKGKYVVFF	27	NaN	21.7712	22.1143	22.9687	NaN	21.9	NaN	NaN	NaN	22.679	22.8689	NaN	22.2695	22.297	K	2	___1	1	9.02232e-17
Q06830;A0A0A0MSI0	Q06830	Peroxiredoxin-1	PRDX1	VMPDGQFKDISLSDYKGKYVVFFFYPLDFTF	35	22.6675	NaN	21.7762	23.6712	21.1527	23.3943	22.4489	22.4336	23.4483	21.5451	22.932	NaN	22.3224	NaN	K	2	___1	1	0.00502713
Q06830;A0A0A0MSI0;A0A0A0MRQ5;Q13162;H7C3T4	Q06830;Q13162	Peroxiredoxin-1;Peroxiredoxin-4	PRDX1;PRDX4	ADEGISFRGLFIIDDKGILRQITVNDLPVGR;EDSGHTLRGLFIIDDKGILRQITLNDLPVGR	136	20.9957	NaN	NaN	21.4979	NaN	NaN	NaN	21.1229	NaN	NaN	NaN	NaN	NaN	NaN	K	2	___1	1	0.00324145
Q06830;A0A0A0MRQ5	Q06830	Peroxiredoxin-1	PRDX1	AGWKPGSDTIKPDVQKSKEYFSKQK______	190	NaN	NaN	21.5673	22.225	21.4417	22.1254	21.9905	NaN	20.8373	NaN	21.3594	21.4095	21.2685	20.5349	K	3	___1	0.999984	3.81524e-05
Q06830;A0A0A0MSI0;A0A0A0MRQ5	Q06830	Peroxiredoxin-1	PRDX1	_________MSSGNAKIGHPAPNFKATAVMP	7	26.1109	NaN	27.031	28.2552	26.7112	22.8557	27.3895	26.3636	25.7415	26.2859	27.6336	26.5343	27.1319	24.0085	K	3	___1	1	2.84353e-101
Q08043;A0A087WSZ2	Q08043	Alpha-actinin-3	ACTN3	TTEQVVASFKILAGDKNYITPEELRRELPAK	849	19.5446	22.1821	23.1179	23.5393	22.5902	NaN	NaN	21.3323	NaN	NaN	NaN	NaN	NaN	NaN	K	2	___1	1	0.000222277
Q08043;A0A087WSZ2	Q08043	Alpha-actinin-3	ACTN3	LSEIRRLQRLQHLAEKFRQKASLHEAWTRGK	412	25.0111	NaN	22.1615	23.4107	23.4689	NaN	NaN	25.0769	NaN	23.6674	24.1514	NaN	NaN	23.1077	K	3	___1	1	0.000336286
Q08043;A0A087WSZ2	Q08043	Alpha-actinin-3	ACTN3	GTLTQKRRDALERMEKLLETIDRLQLEFARR	516	NaN	NaN	NaN	NaN	22.5437	NaN	NaN	NaN	NaN	NaN	NaN	21.1615	NaN	NaN	K	2	___1	1	0.00323595
Q08257-3;Q08257;A6NP24;Q08257-2	Q08257-3	Quinone oxidoreductase	CRYZ	GAHEVFNHREVNYIDKIKVVGSRGTIEINPR	208	22.4395	NaN	NaN	22.4762	NaN	24.0846	22.1098	24.353	NaN	22.6734	22.0254	NaN	22.2931	23.3669	K	2	___1	1	0.00219902
Q08257-3;Q08257;Q08257-2	Q08257-3	Quinone oxidoreductase	CRYZ	IGWLKPVIGSQYPLEKVAEAHENIIHGSGAT	273	22.5518	NaN	NaN	NaN	NaN	NaN	NaN	23.8772	NaN	NaN	NaN	NaN	NaN	NaN	K	4	___1	1	4.46425e-68
Q08257-3;Q08257;A6NP24;C9JH92	Q08257-3	Quinone oxidoreductase	CRYZ	MRAVRVFEFGGPEVLKLRSDIAVPIPKDHQV	23	24.4136	24.1629	25.5442	24.2657	NaN	25.2537	24.1119	25.6617	22.9816	28.4013	26.7661	24.3954	26.047	25.4108	K	2	___1	1	3.16964e-11
X6R941;Q09161	X6R941	Nuclear cap-binding protein subunit 1	NCBP1	HSTIRKMNKHVLKIQKELEEAKEKLARQHKR	24	NaN	22.8778	NaN	23.379	21.6824	22.0371	20.073	22.4377	22.055	NaN	22.6572	22.7077	21.4858	22.3054	K	2	___1	1	0.00213277
Q09666	Q09666	Neuroblast differentiation-associated protein AHNAK	AHNAK	VSLEGGKVKGKHGKLKFGTFGGLGSKSKGHY	5821	NaN	NaN	NaN	22.3086	NaN	21.3187	NaN	21.6312	NaN	NaN	22.9003	NaN	NaN	22.7677	K	2	___1	1	0.000890559
Q09666	Q09666	Neuroblast differentiation-associated protein AHNAK	AHNAK	QGPDWHLKMPKMKMPKFSMPGFKAEGPEVDV	884	23.4203	22.8502	23.0815	24.1326	24.2185	22.7323	21.2552	22.9211	NaN	23.1452	24.5171	24.2664	23.9542	23.9473	K	2	___1	1	0.000633464
Q09666	Q09666	Neuroblast differentiation-associated protein AHNAK	AHNAK	QGPGSKLNVPKMKVPKFSVSGAKGEETGIDV	438	NaN	22.587	21.4971	21.9226	21.6328	20.2115	NaN	22.1806	21.5381	NaN	22.283	22.0912	22.3206	22.8569	K	2	___1	1	0.00558944
Q0ZGT2-2;Q0ZGT2;H7BXY5;Q0ZGT2-4;E7EUA0;E7ETM8	Q0ZGT2-2	Nexilin	NEXN	DEIESEAKKESLSPGKLKLTFEELERQRQEN	232	NaN	NaN	NaN	NaN	NaN	NaN	NaN	NaN	NaN	NaN	20.9633	22.2789	NaN	NaN	K	2	___1	1	0.00630669
Q0ZGT2-2;Q0ZGT2;H7BXY5;Q0ZGT2-4;Q0ZGT2-3	Q0ZGT2-2	Nexilin	NEXN	KNLKSKFEKIGQLSEKEIQKKIEEERARRRA	447	NaN	NaN	NaN	NaN	NaN	NaN	NaN	NaN	NaN	NaN	NaN	22.4399	20.4085	21.4648	K	2	___1	1	0.000528966
Q10713-2;Q10713	Q10713-2	Mitochondrial-processing peptidase subunit alpha	PMPCA	NTVGLHRFCPTENVAKINREVLHSYLRNYYT	101	NaN	NaN	NaN	NaN	NaN	NaN	NaN	21.6946	NaN	NaN	NaN	NaN	NaN	NaN	K	2	___1	1	0.00264302
Q10713-2;Q10713	Q10713-2	Mitochondrial-processing peptidase subunit alpha	PMPCA	HELCTLIRNVKPEDVKRVASKMLRGKPAVAA	347	21.0873	NaN	NaN	NaN	NaN	NaN	NaN	22.3527	NaN	NaN	NaN	NaN	NaN	NaN	K	3	___1	0.999999	0.00752975
Q10713-2;Q10713	Q10713-2	Mitochondrial-processing peptidase subunit alpha	PMPCA	VDIDRSVAQYTGGIAKLERDMSNVSLGPTPI	168	21.6319	NaN	21.9181	NaN	NaN	21.897	NaN	23.7622	21.519	24.5937	22.8705	NaN	21.7665	22.5516	K	2	___1	1	1.30799e-05
Q12797-4;Q12797-3	Q12797-4	Aspartyl/asparaginyl beta-hydroxylase	ASPH	VDDAKVLLEGPSGVAKRKTKAKVKELTKEEL	86	24.1034	24.6271	24.4704	24.5571	24.0687	24.2259	22.1267	24.0867	22.3275	23.4843	24.4218	24.7191	23.8316	24.5904	K	2	___1	1	4.76732e-12
Q12931-2;Q12931;I3L0K7	Q12931-2	Heat shock protein 75 kDa, mitochondrial	TRAP1	DVLQQRLIKFFIDQSKKDAEKYAKFFEDYGL	378	24.8647	NaN	24.2449	24.2823	25.3485	25.4958	24.2369	26.6759	22.0489	26.9391	25.1965	21.7123	25.782	25.4998	K	2	___1	1	0.00288619
Q12931-2;Q12931;I3L0K7	Q12931-2	Heat shock protein 75 kDa, mitochondrial	TRAP1	ALIRKLRDVLQQRLIKFFIDQSKKDAEKYAK	371	NaN	NaN	25.3837	24.9966	25.895	26.0488	25.0874	25.6028	24.0968	27.5644	26.2262	25.2042	26.5019	24.8044	K	2	___1	1	7.2714e-05
Q12931-2;Q12931	Q12931-2	Heat shock protein 75 kDa, mitochondrial	TRAP1	TKKLLDIVARSLYSEKEVFIRELISNASDAL	56	NaN	NaN	NaN	NaN	NaN	NaN	NaN	NaN	NaN	23.6423	NaN	NaN	21.6329	NaN	K	2	___1	1	0.000502709
Q12931-2;Q12931;I3L0K7;I3L239	Q12931-2	Heat shock protein 75 kDa, mitochondrial	TRAP1	YVAQAHDKPRYTLHYKTDAPLNIRSIFYVPD	279	NaN	NaN	NaN	NaN	NaN	NaN	NaN	22.158	NaN	NaN	NaN	NaN	NaN	NaN	K	3	___1	1	7.10885e-06
Q13011	Q13011	Delta(3,5)-Delta(2,4)-dienoyl-CoA isomerase, mitochondrial	ECH1	DLVKSVQATTENKELKTVTFSKL________	321	NaN	NaN	NaN	NaN	20.738	NaN	NaN	NaN	NaN	NaN	NaN	22.7039	NaN	NaN	K	2	___1	1	0.00604947
Q13011	Q13011	Delta(3,5)-Delta(2,4)-dienoyl-CoA isomerase, mitochondrial	ECH1	QTQDLVKSVQATTENKELKTVTFSKL_____	318	NaN	NaN	NaN	NaN	NaN	20.4125	NaN	NaN	NaN	NaN	NaN	NaN	19.6304	NaN	K	2	___1	1	0.000921929
Q13061;H9ME53;Q13061-3;Q13061-2	Q13061	Triadin	TRDN	NFSASSIAKIGSDPLKLVRDAMEETTDWIYG	90	NaN	NaN	20.8492	21.511	21.5049	21.3238	21.0744	21.3954	NaN	21.5606	21.5709	NaN	21.0544	22.6185	K	2	___1	1	8.42609e-05
Q13061	Q13061	Triadin	TRDN	ETKKKEKEDIKKKSEKETAIDVEKKEPGKAS	341	20.8635	NaN	NaN	NaN	NaN	NaN	NaN	21.9109	NaN	NaN	NaN	NaN	NaN	NaN	K	2	___1	1	0.000112709
Q13228;Q13228-4;Q13228-2;Q13228-3	Q13228	Selenium-binding protein 1	SELENBP1	SVMLQVDVDTVKGGLKLNPNFLVDFGKEPLG	437	23.044	NaN	21.4453	22.8538	22.4367	NaN	NaN	22.8523	NaN	23.3773	22.236	NaN	19.9278	20.3166	K	2	___1	1	2.36187e-07
Q13228;Q13228-4;Q13228-2;Q13228-3	Q13228	Selenium-binding protein 1	SELENBP1	IVKGGPVQVLEDEELKSQPEPLVVKGKRVAG	370	22.2194	NaN	NaN	NaN	NaN	NaN	NaN	21.5613	NaN	NaN	NaN	NaN	NaN	NaN	K	3	___1	1	6.91727e-17
Q13423;E9PCX7	Q13423	NAD(P) transhydrogenase, mitochondrial	NNT	YSNNITKLLKAISPDKDNFYFDVKDDFDFGT	403	25.9747	22.4794	23.6515	24.0369	24.1356	NaN	NaN	25.6219	24.8916	26.7011	23.6624	23.798	24.5867	25.1462	K	2	___1	1	2.56377e-07
Q13423;D6RAI5;D6RHU2	Q13423	NAD(P) transhydrogenase, mitochondrial	NNT	QELWCKAPVKPGIPYKQLTVGVPKEIFQNEK	55	22.8729	NaN	NaN	NaN	23.3961	23.9135	22.1993	23.8926	NaN	24.2588	23.8046	24.4892	24.2654	23.4641	K	2	___1	1	2.24095e-08
Q13423;D6RAI5;D6RHU2	Q13423	NAD(P) transhydrogenase, mitochondrial	NNT	KQLTVGVPKEIFQNEKRVALSPAGVQNLVKQ	70	32.7228	31.3855	31.7597	30.506	31.8837	32.0459	30.5571	32.9774	30.7447	32.7175	31.4715	30.8147	32.1367	31.6464	K	2	___1	1	0.000335646
Q13423;E9PCX7	Q13423	NAD(P) transhydrogenase, mitochondrial	NNT	NHFGRFFTGQITAAGKVPPAKILIVGGGVAG	224	NaN	NaN	21.498	21.013	22.3561	22.8721	22.7508	21.5381	NaN	23.069	21.6331	21.313	22.2654	22.4425	K	3	___1	1	4.6803e-07
Q13423;E9PCX7	Q13423	NAD(P) transhydrogenase, mitochondrial	NNT	DFGTMGHVIRGTVVMKDGKVIFPAPTPKNIP	430	23.9503	NaN	22.1246	NaN	NaN	NaN	20.6073	24.1061	NaN	22.8398	NaN	20.457	21.9073	NaN	K	2	___1	1	0.00159341
Q13423;E9PCX7	Q13423	NAD(P) transhydrogenase, mitochondrial	NNT	TQASTLYSNNITKLLKAISPDKDNFYFDVKD	397	NaN	NaN	21.0121	NaN	21.906	21.9947	20.8895	21.4331	NaN	21.5874	20.9967	22.537	22.1748	22.8244	K	2	___1	1	0.00366015
Q13423;E9PCX7	Q13423	NAD(P) transhydrogenase, mitochondrial	NNT	RMATQASTLYSNNITKLLKAISPDKDNFYFD	394	27.2895	26.2533	28.0303	26.8595	28.2781	27.9248	25.9336	28.1195	25.7723	30.0607	26.6653	27.4636	28.8948	28.4932	K	2	___1	1	1.28607e-246
Q13423;E9PCX7	Q13423	NAD(P) transhydrogenase, mitochondrial	NNT	PIFYKPNTAMLLGDAKKTCDALQAKVRESYQ	1070	NaN	NaN	21.9468	NaN	NaN	20.9589	NaN	NaN	NaN	NaN	21.8169	21.4215	22.1386	NaN	K	2	___1	1	2.12378e-06
Q13423;D6RAI5;D6RHU2	Q13423	NAD(P) transhydrogenase, mitochondrial	NNT	QGFNVVVESGAGEASKFSDDHYRVAGAQIQG	100	22.5849	NaN	NaN	NaN	NaN	NaN	NaN	25.675	NaN	25.8977	24.9107	23.472	22.449	21.3248	K	3	___1	1	1.32774e-90
Q13423;E9PCX7	Q13423	NAD(P) transhydrogenase, mitochondrial	NNT	MLLGDAKKTCDALQAKVRESYQK________	1079	NaN	20.5107	21.1129	NaN	NaN	NaN	NaN	NaN	NaN	22.0659	21.282	21.8129	21.3086	20.1668	K	2	___1	1	6.23319e-05
Q13642-5;Q13642-4;Q13642-1;Q5JXI2;Q5JXI8;Q13642;A0A0D9SFZ9;Q5JXH8;Q5JXH7;Q5JXI3;Q13642-3;A0A0D9SFI6;A0A0D9SFB0;Q5JXH9;A0A0D9SGB2;Q5JXI0;A0A0D9SG53	Q13642-5	Four and a half LIM domains protein 1	FHL1	CAKCLHPLANETFVAKDNKILCNKCTTREDS	99	21.8952	NaN	NaN	NaN	NaN	NaN	NaN	21.5272	NaN	NaN	NaN	NaN	NaN	NaN	K	3	___1	1	1.14673e-05
Q13642-5;Q13642-4;Q13642-1;Q5JXI2;Q5JXI8;Q13642;A0A0D9SFZ9;Q5JXH8;Q5JXH7;Q5JXI3;Q13642-3;A0A0D9SFI6;A0A0D9SFB0;Q5JXH9;A0A0D9SGB2;Q5JXI0;A0A0D9SG53	Q13642-5	Four and a half LIM domains protein 1	FHL1	CLHPLANETFVAKDNKILCNKCTTREDSPKC	102	24.0982	NaN	NaN	NaN	NaN	NaN	NaN	23.6033	22.2635	21.0449	22.7778	23.7142	22.4057	23.2747	K	2	___1	1	0.00252034
Q13642-5;Q13642-4;Q13642-1	Q13642-5	Four and a half LIM domains protein 1	FHL1	DYCFHCKKCSVNLANKRFVFHQEQVYCPDCA	278	NaN	NaN	NaN	NaN	NaN	NaN	NaN	NaN	20.6699	NaN	20.9357	19.2447	20.7018	NaN	K	2	___1	1	0.0044189
Q13642-5;Q13642-4;Q13642-1;Q5JXI2;Q5JXI8;Q13642;A0A0D9SFZ9;Q5JXH8;Q5JXH7;Q5JXI3;Q13642-3;A0A0D9SFI6;A0A0D9SFB0;Q5JXH9;A0A0D9SGB2;Q5JXI0;A0A0D9SG53;A0A0D9SGD1;A0A0D9SEY7	Q13642-5	Four and a half LIM domains protein 1	FHL1	QGKKYVQKDGHHCCLKCFDKFCANTCVECRK	46	23.4057	NaN	NaN	NaN	NaN	NaN	NaN	21.6892	NaN	NaN	NaN	NaN	NaN	NaN	K	3	___1	1	8.89208e-05
Q13642-5;Q13642-4;Q13642-1;Q5JXI2;Q5JXI8;Q13642;A0A0D9SFZ9;Q5JXH8;Q5JXH7;Q5JXI3;Q13642-3;A0A0D9SFI6;A0A0D9SFB0;Q5JXH9;A0A0D9SGB2;Q5JXI0;A0A0D9SG53;A0A0D9SGD1;A0A0D9SEY7	Q13642-5	Four and a half LIM domains protein 1	FHL1	ECRKPIGADSKEVHYKNRFWHDTCFRCAKCL	73	24.5984	NaN	21.8778	NaN	20.7853	23.3531	NaN	24.9427	NaN	21.326	21.9767	NaN	22.9879	23.6323	K	3	___1	1	0.00689484
Q13642-5;Q13642-4;Q13642-1	Q13642-5	Four and a half LIM domains protein 1	FHL1	RFVFHQEQVYCPDCAKKL_____________	294	24.3275	NaN	NaN	NaN	NaN	NaN	NaN	25.2672	NaN	22.6223	20.3758	NaN	NaN	NaN	K	3	___1	1	1.25866e-05
Q13642-5;Q13642-4;Q13642-1;Q5JXI2;Q5JXI8;Q13642;A0A0D9SFZ9;Q5JXH8;Q5JXH7;Q5JXI3;Q13642-3	Q13642-5	Four and a half LIM domains protein 1	FHL1	FPKGEDFYCVTCHETKFAKHCVKCNKAITSG	173	23.3531	NaN	NaN	NaN	NaN	NaN	NaN	24.8188	NaN	NaN	21.0613	NaN	NaN	NaN	K	3	___1	1	8.89377e-10
Q13642-5;Q5JXI2	Q13642-5	Four and a half LIM domains protein 1	FHL1	___MASHRHSGPSSYKVGTMAEKFDCHYCRD	13	25.3615	24.9507	23.4947	25.9009	25.8243	25.3504	23.9297	25.9236	22.2054	24.4986	25.9368	25.2329	20.9275	25.7782	K	3	___1	1	6.67513e-75
Q13642-5;Q13642-4;Q5JXI2	Q13642-5	Four and a half LIM domains protein 1	FHL1	RHSGPSSYKVGTMAEKFDCHYCRDPLQGKKY	20	27.4094	NaN	NaN	NaN	21.0443	NaN	NaN	27.438	23.8416	26.1165	26.1597	23.9626	22.4149	23.8443	K	3	___1	1	1.41356e-08
Q13642-5;Q13642-4;Q13642-1;Q5JXI2;Q5JXI8;Q13642;A0A0D9SFZ9;Q5JXH8;Q5JXH7;Q5JXI3;Q13642-3;A0A0D9SFI6;A0A0D9SFB0;Q5JXH9;A0A0D9SGB2;Q5JXI0;A0A0D9SG53;A0A0D9SGD1;A0A0D9SEY7	Q13642-5	Four and a half LIM domains protein 1	FHL1	CHYCRDPLQGKKYVQKDGHHCCLKCFDKFCA	38	26.0968	NaN	NaN	NaN	NaN	NaN	NaN	24.9819	20.4511	21.7392	NaN	NaN	NaN	NaN	K	3	___1	1	0.000113498
Q13643	Q13643	Four and a half LIM domains protein 3	FHL3	VPDKGAHYCVPCYENKFAPRCARCSKTLTQG	157	23.1983	NaN	NaN	NaN	NaN	NaN	NaN	22.3852	NaN	NaN	NaN	NaN	NaN	NaN	K	3	___1	1	0.00180632
Q13643	Q13643	Four and a half LIM domains protein 3	FHL3	SGCEQPLGSRSFVPDKGAHYCVPCYENKFAP	145	22.9911	NaN	NaN	NaN	NaN	NaN	NaN	23.0294	NaN	NaN	NaN	NaN	NaN	NaN	K	3	___1	1	3.91755e-07
Q13825;Q13825-2	Q13825	Methylglutaconyl-CoA hydratase, mitochondrial	AUH	IRVAASSAKMGLVETKLAIIPGGGGTQRLPR	211	23.8683	24.8782	23.7399	24.7634	26.5787	25.7179	24.5195	25.2628	NaN	26.5632	25.3685	26.0385	26.2636	25.8673	K	3	___1	1	1.05394e-69
Q13825	Q13825	Methylglutaconyl-CoA hydratase, mitochondrial	AUH	ERAKMSSSEVGPFVSKIRAVINDIANLPVPT	160	23.1211	22.7446	23.7369	23.6629	26.1978	25.2513	24.6568	24.3863	23.1187	25.4833	24.1836	23.9179	24.9538	25.4618	K	3	___1	1	3.41588e-110
Q13825;Q13825-2	Q13825	Methylglutaconyl-CoA hydratase, mitochondrial	AUH	ELALACDIRVAASSAKMGLVETKLAIIPGGG	204	25.9064	25.6357	25.0395	25.1864	26.7917	26.9009	26.7218	26.9476	26.4346	26.0641	26.3957	26.5441	26.1689	27.6254	K	3	___1	1	5.45291e-81
Q14118	Q14118	Dystroglycan;Alpha-dystroglycan;Beta-dystroglycan	DAG1	HRRPQGDRAPARFKAKFVGDPALVLNDIHKK	611	NaN	NaN	NaN	23.208	23.0477	NaN	NaN	24.8388	NaN	24.096	23.6569	NaN	22.7684	22.6402	K	3	___1	1	5.41946e-06
Q14118	Q14118	Dystroglycan;Alpha-dystroglycan;Beta-dystroglycan	DAG1	AKFVGDPALVLNDIHKKIALVKKLAFAFGDR	625	21.3809	NaN	NaN	22.6584	NaN	NaN	NaN	22.1184	NaN	NaN	NaN	NaN	21.0111	NaN	K	3	___1	1	0.000138388
Q14118	Q14118	Dystroglycan;Alpha-dystroglycan;Beta-dystroglycan	DAG1	AGIIAMICYRKKRKGKLTLEDQATFIKKGVP	782	23.9415	25.5412	26.1748	27.0801	26.485	25.3897	26.425	25.077	25.8591	26.5479	27.43	27.4427	26.5194	27.2853	K	2	___1	1	2.31385e-35
Q15424-2;Q15424;Q15424-4;Q15424-3;Q14151	Q15424-2	Scaffold attachment factor B1;Scaffold attachment factor B2	SAFB;SAFB2	AHAQSSKADSLLAVVKREPAEQPGDGERTDC	225	20.5369	NaN	23.4214	24.8553	24.47	24.5707	23.3098	23.9682	NaN	25.0123	25.3943	20.759	25.2099	25.0455	K	2	___1	1	0.000128876
Q14315-2;Q14315	Q14315-2	Filamin-C	FLNC	KPTHFTVLTKGAGKAKLDVQFAGTAKGEVVR	901	NaN	NaN	NaN	21.5969	NaN	21.0737	NaN	19.4027	21.9082	NaN	19.6404	20.2648	20.3955	21.5325	K	2	___1	1	0.000636823
Q14315-2;Q14315	Q14315-2	Filamin-C	FLNC	ASIRAPSGNEEPCLLKRLPNRHIGISFTPKE	1961	23.3871	21.7515	21.556	NaN	NaN	NaN	NaN	22.9648	NaN	21.8992	22.1236	19.4583	23.0529	22.8252	K	2	___1	1	1.28517e-66
Q14315-2;Q14315	Q14315-2	Filamin-C	FLNC	GLQPKGVRVKEVADFKVFTKGAGSGELKVTV	498	NaN	21.2207	21.8307	23.1693	NaN	23.0335	20.6412	23.2353	NaN	NaN	NaN	21.0325	NaN	23.2493	K	2	___1	1	0.00317769
Q14315-2;Q14315	Q14315-2	Filamin-C	FLNC	PTEPGTYIINIKFADKHVPGSPFTVKVTGEG	2084	24.674	NaN	NaN	21.4284	NaN	22.1858	20.0856	24.7611	NaN	21.6194	22.9167	NaN	21.0939	23.0223	K	3	___1	1	5.69883e-05
Q14315-2;Q14315	Q14315-2	Filamin-C	FLNC	PTAPGDYSIIVRFDDKHIPGSPFTAKITGDD	1902	23.7036	NaN	NaN	NaN	21.0703	NaN	NaN	22.8915	NaN	NaN	NaN	22.6563	NaN	21.1115	K	3	___1	1	0.000953508
Q14315-2;Q14315	Q14315-2	Filamin-C	FLNC	IDVKFNGAHIPGSPFKIRVGEQSQAGDPGLV	2460	NaN	NaN	NaN	NaN	NaN	NaN	NaN	22.6137	NaN	NaN	NaN	NaN	NaN	NaN	K	3	___1	1	9.81422e-05
Q14315-2;Q14315	Q14315-2	Filamin-C	FLNC	VRFVPQEMGPHTVAVKYRGQHVPGSPFQFTV	2258	NaN	NaN	NaN	NaN	21.2982	21.1096	NaN	23.1567	NaN	21.8446	23.2331	21.7864	NaN	20.9203	K	3	___1	1	9.013e-07
Q14315-2;Q14315	Q14315-2	Filamin-C	FLNC	TKSSSSRGSSYSSIPKFSSDASKVVTRGPGL	2597	23.0303	23.1971	23.1129	23.9289	23.8145	23.6856	NaN	23.442	22.3615	22.9069	23.8873	23.2436	23.4836	23.9565	K	2	___1	1	9.14213e-05
Q14315-2;Q14315	Q14315-2	Filamin-C	FLNC	LKVTVKGPKGTEEPVKVREAGDGVFECEYYP	524	22.1685	22.4372	21.2097	22.478	NaN	NaN	NaN	23.2173	NaN	21.6214	22.9417	23.1559	22.5282	23.1585	K	2	___1	1	0.00211512
Q14315-2;Q14315	Q14315-2	Filamin-C	FLNC	VSVRKSGKHVTNSPFKILVGPSEIGDASKVR	1997	22.2288	NaN	NaN	NaN	NaN	NaN	NaN	22.0463	NaN	NaN	NaN	NaN	NaN	NaN	K	3	___1	1	9.2338e-15
Q14315-2;Q14315	Q14315-2	Filamin-C	FLNC	IDFDIIKNDNDTFTVKYTPPGAGRYTIMVLF	832	21.9863	NaN	21.2441	20.9596	NaN	22.3057	NaN	22.0827	20.1529	NaN	20.6759	NaN	21.0317	NaN	K	2	___1	1	5.96026e-33
Q14315-2;Q14315	Q14315-2	Filamin-C	FLNC	RSPFEVQVSPEAGVQKVRAWGPGLETGQVGK	573	21.2723	NaN	22.2114	23.1381	23.4135	22.4313	20.4789	22.9	22.6414	NaN	23.2567	23.7814	21.5434	23.8983	K	2	___1	1	1.29349e-71
Q14315-2;Q14315	Q14315-2	Filamin-C	FLNC	GSHPERVKVYGPGVEKTGLKANEPTYFTVDC	776	26.4891	NaN	25.2041	26.3258	25.9576	26.7203	26.2055	26.2661	25.6297	25.2863	26.1671	21.6227	26.1117	26.55	K	2	___1	1	0.000520471
Q14315-2;Q14315	Q14315-2	Filamin-C	FLNC	DNKDGTITVRYAPTEKGLHQMGIKYDGNHIP	1798	25.5126	23.0226	23.4248	25.1472	24.7755	25.4137	24.3317	25.7891	23.518	24.5397	25.3575	22.1663	24.7684	25.5008	K	3	___1	1	3.73281e-05
Q14315-2;Q14315	Q14315-2	Filamin-C	FLNC	GTYTITIKYGGHPVPKFPTRVHVQPAVDTSG	1237	23.1196	NaN	NaN	NaN	NaN	NaN	NaN	23.2443	NaN	NaN	NaN	NaN	NaN	NaN	K	3	___1	1	0.00735468
Q14315-2;Q14315	Q14315-2	Filamin-C	FLNC	AIKYGGPQHIVGSPFKAKVTGPRLSGGHSLH	2556	23.7192	NaN	NaN	21.9446	21.1456	22.0413	NaN	23.9733	NaN	NaN	22.829	NaN	21.5658	NaN	K	3	___1	1	2.1382e-05
Q14324	Q14324	Myosin-binding protein C, fast-type	MYBPC2	FKPFEYKEHDFRMAPKFLTPLIDRVVVAGYS	1049	22.9902	24.5049	25.3193	25.7022	24.1981	NaN	NaN	24.4464	NaN	23.4299	25.454	22.0326	24.4089	24.2617	K	2	___1	1	0.000221692
Q14324	Q14324	Myosin-binding protein C, fast-type	MYBPC2	TLKWFKNGQEIKPSSKYVFENVGKKRILTIN	301	NaN	NaN	NaN	NaN	NaN	NaN	NaN	NaN	NaN	NaN	21.0184	NaN	19.9076	21.2871	K	2	___1	1	4.13508e-06
Q14324	Q14324	Myosin-binding protein C, fast-type	MYBPC2	QEIKPSSKYVFENVGKKRILTINKCTLADDA	309	NaN	22.3339	22.4231	22.2261	21.8489	21.9147	22.6324	NaN	21.1961	21.2909	22.6165	22.0144	21.9466	23.4	K	2	___1	1	0.00288011
Q14324	Q14324	Myosin-binding protein C, fast-type	MYBPC2	EAPRQDASGQSLESFKRTSEKKSDTAGELDF	169	NaN	NaN	NaN	NaN	NaN	NaN	NaN	NaN	NaN	NaN	NaN	NaN	20.4546	20.982	K	2	___1	1	9.24539e-05
Q14324	Q14324	Myosin-binding protein C, fast-type	MYBPC2	KKSDTAGELDFSGLLKKREVVEEEKKKKKKD	189	20.4455	NaN	NaN	NaN	NaN	NaN	NaN	21.4406	NaN	NaN	NaN	NaN	NaN	23.4022	K	2	___1	1	2.42507e-05
Q14324	Q14324	Myosin-binding protein C, fast-type	MYBPC2	ENMKDTATIRIRVVEKAGPPINVMVKEVWGT	932	NaN	20.5629	22.2759	22.5892	20.7903	21.5864	21.621	NaN	NaN	NaN	22.1622	20.3985	21.0847	23.3251	K	2	___1	1	0.000261441
Q14814-6;Q14814-3;Q14814-5;Q14814-4;Q14814-2;Q14814	Q14814-6	Myocyte-specific enhancer factor 2D	MEF2D	LLRPAPEPEAEGSAVKRMRLDTWTLK_____	458	NaN	NaN	NaN	NaN	NaN	NaN	NaN	20.916	NaN	NaN	NaN	NaN	NaN	NaN	K	3	___1	1	3.19806e-17
Q15046;Q15046-2;H3BVA8;J3KRL2	Q15046	Lysine--tRNA ligase	KARS	SRNYKSEEEFIHINNKLRRGDIIGVQGNPGK	175	22.1576	NaN	NaN	NaN	NaN	NaN	NaN	22.6758	NaN	NaN	NaN	NaN	NaN	NaN	K	3	___1	1	4.41559e-05
Q15119	Q15119	[Pyruvate dehydrogenase (acetyl-transferring)] kinase isozyme 2, mitochondrial	PDK2	WVWALLKNASLAGAPKYIEHFSKFSPSPLSM	18	NaN	NaN	NaN	NaN	NaN	NaN	NaN	22.1505	NaN	NaN	NaN	NaN	NaN	NaN	K	3	___1	1	0.000152636
Q15119	Q15119	[Pyruvate dehydrogenase (acetyl-transferring)] kinase isozyme 2, mitochondrial	PDK2	NASLAGAPKYIEHFSKFSPSPLSMKQFLDFG	25	NaN	NaN	NaN	NaN	NaN	NaN	NaN	22.4158	NaN	NaN	NaN	NaN	NaN	NaN	K	3	___1	1	0.000843057
Q15149-7;Q15149-8;Q15149-9;Q15149-5;Q15149-4;Q15149-6;Q15149-3;Q15149-2;Q15149	Q15149-7	Plectin	PLEC	EEQAQARAQAQAAAEKLRKEAEQEAARRAQA	2105	NaN	NaN	NaN	21.4108	20.4676	22.0174	20.9657	NaN	NaN	NaN	NaN	NaN	NaN	NaN	K	2	___1	1	0.000332443
Q15149-7;Q15149-8;Q15149-9;Q15149-5;Q15149-4;Q15149-6;Q15149-3;Q15149-2;Q15149	Q15149-7	Plectin	PLEC	ARDVFEKATVSAPFGKFQGKTVTIWEIINSE	2884	NaN	NaN	NaN	NaN	NaN	NaN	NaN	NaN	NaN	NaN	20.76	NaN	21.3782	21.7269	K	2	___1	1	0.00107939
Q15233-2;Q15233	Q15233-2	Non-POU domain-containing octamer-binding protein	NONO	PAFNRAAPGAEFAPNKRRRY___________	378	NaN	22.188	21.0658	21.717	21.0298	NaN	NaN	NaN	NaN	NaN	NaN	NaN	20.8024	21.4187	K	2	___1	1	0.00601466
Q15233-2;Q15233;C9IZL7;H7C367	Q15233-2	Non-POU domain-containing octamer-binding protein	NONO	DRGRPSGKGIVEFSGKPAARKALDRCSEGSF	109	NaN	NaN	NaN	NaN	NaN	NaN	NaN	NaN	NaN	NaN	NaN	21.1086	NaN	20.8142	K	2	___1	1	0.00526247
Q15327	Q15327	Ankyrin repeat domain-containing protein 1	ANKRD1	EPVDVPTFLKAALENKLPVVEKFLSDKNNPD	132	21.7412	NaN	NaN	NaN	NaN	NaN	NaN	22.2004	NaN	NaN	NaN	20.9123	NaN	NaN	K	2	___1	1	0.00704765
Q15847	Q15847	Adipogenesis regulatory factor	ADIRF	DKTANQASDTFSGIGKKFGLLK_________	70	NaN	NaN	21.1626	22.1979	21.3226	21.3885	NaN	NaN	NaN	NaN	21.9024	NaN	21.5972	22.2378	K	2	___1	1	4.98369e-28
Q16134;Q16134-3	Q16134	Electron transfer flavoprotein-ubiquinone oxidoreductase, mitochondrial	ETFDH	LDPGAFKELFPDWKEKGAPLNTPVTEDRFGI	134	NaN	NaN	NaN	NaN	21.5518	NaN	NaN	NaN	NaN	NaN	NaN	21.5914	20.6509	21.6937	K	2	___1	1	0.000310417
Q16134;Q16134-3	Q16134	Electron transfer flavoprotein-ubiquinone oxidoreductase, mitochondrial	ETFDH	LNTPVTEDRFGILTEKYRIPVPILPGLPMNN	153	22.5191	21.8616	NaN	NaN	NaN	22.4362	NaN	23.3126	NaN	21.946	21.2153	NaN	22.935	NaN	K	2	___1	1	0.00038183
Q16134;Q16134-3;D6RAD5	Q16134	Electron transfer flavoprotein-ubiquinone oxidoreductase, mitochondrial	ETFDH	DGSVKGIATNDVGIQKDGAPKATFERGLELH	223	NaN	NaN	NaN	NaN	NaN	21.5113	NaN	NaN	NaN	NaN	20.1619	20.602	21.3825	20.7448	K	2	___1	1	1.68829e-07
Q16134;Q16134-3	Q16134	Electron transfer flavoprotein-ubiquinone oxidoreductase, mitochondrial	ETFDH	LSAAVRLKQLAVAHEKDIRVCLVEKAAQIGA	96	21.8395	NaN	NaN	NaN	NaN	NaN	NaN	22.4886	NaN	NaN	NaN	NaN	NaN	NaN	K	3	___1	1	0.00752382
Q16698-2;Q16698;E5RJG7;E5RFV2;E5RID6	Q16698-2	2,4-dienoyl-CoA reductase, mitochondrial	DECR1	QNTEALQSKFFSPLQKAMLPPNSFQGKVAFI	40	27.4137	24.6446	27.9168	27.9515	28.6759	28.4038	27.6699	28.2915	26.8851	28.8888	27.9811	28.2289	28.7681	28.3049	K	2	___1	1	7.97157e-83
Q16698-2;Q16698;H0YAW3	Q16698-2	2,4-dienoyl-CoA reductase, mitochondrial	DECR1	GKYGMRFNVIQPGPIKTKGAFSRLDPTGTFE	235	28.8877	27.4574	28.4731	28.9029	30.2845	29.9575	27.3032	29.6787	27.8583	30.627	25.8712	27.1144	30.2144	30.6872	K	2	___1	1	0.00023899
Q16698-2;Q16698;E5RJG7;E5RFV2;E5RJD2	Q16698-2	2,4-dienoyl-CoA reductase, mitochondrial	DECR1	LGAQCVIASRKMDVLKATAEQISSQTGNKVH	88	22.1096	NaN	NaN	NaN	23.3453	23.8018	22.2065	23.9627	NaN	23.8888	22.1171	22.0617	22.3139	23.4243	K	3	___1	1	9.50573e-43
Q16698-2;Q16698	Q16698-2	2,4-dienoyl-CoA reductase, mitochondrial	DECR1	TKGAFSRLDPTGTFEKEMIGRIPCGRLGTVE	251	NaN	22.0576	22.8293	22.3746	24.7847	24.2153	22.0337	24.4533	22.3937	23.9519	23.8475	24.1912	23.9809	24.4006	K	2	___1	1	1.59905e-19
Q16718;F8WAS3;C9IZN5;A0A087X1G1;H7BYD0;Q16718-2	Q16718	NADH dehydrogenase [ubiquinone] 1 alpha subcomplex subunit 5	NDUFA5	RKYTEQITNEKLAMVKAEPDVKKLEDQLQGG	60	NaN	NaN	NaN	NaN	NaN	21.7915	NaN	NaN	20.2227	NaN	NaN	21.1566	NaN	19.2961	K	2	___1	1	0.00108308
Q16718;F8WAS3;C9IZN5;A0A087X1G1;H7BYD0;Q16718-2	Q16718	NADH dehydrogenase [ubiquinone] 1 alpha subcomplex subunit 5	NDUFA5	KNAAYRKYTEQITNEKLAMVKAEPDVKKLED	55	NaN	NaN	NaN	NaN	23.216	22.1542	NaN	NaN	NaN	20.9288	22.1177	22.0616	21.8166	22.6729	K	3	___1	1	2.58693e-16
Q16762	Q16762	Thiosulfate sulfurtransferase	TST	HPVTSEPSRPEPAVFKATLDRSLLKTYEQVL	154	24.3009	NaN	NaN	NaN	NaN	NaN	NaN	25.1602	NaN	NaN	NaN	NaN	NaN	NaN	K	4	___1	1	8.56552e-78
Q16762;B1AH48	Q16762	Thiosulfate sulfurtransferase	TST	ALVSTKWLAESIRTGKLGPGLRVLDASWYSP	24	23.087	NaN	23.5629	22.7041	21.7764	24.2992	22.6417	24.9541	23.6899	24.9739	24.2094	24.1497	24.1219	23.7894	K	2	___1	1	0.00219901
Q16775-2;Q16775;H3BPK3;H3BPQ4;H3BQW8;Q16775-3	Q16775-2	Hydroxyacylglutathione hydrolase, mitochondrial	HAGH	THHHWDHAGGNEKLVKLESGLKVYGGDDRIG	68	25.0897	24.8831	NaN	25.5599	24.6686	25.1404	25.0125	23.8696	23.0375	24.2753	24.7863	25.803	25.2844	25.493	K	2	___1	1	0.00604947
Q16795	Q16795	NADH dehydrogenase [ubiquinone] 1 alpha subcomplex subunit 9, mitochondrial	NDUFA9	IKSSSRYLRNKAVGEKVVRDAFPEAIIVKPS	189	28.385	NaN	26.9741	27.1937	27.8234	28.875	28.588	29.071	27.2731	28.2626	27.5971	27.3183	28.1914	27.714	K	2	___1	1	0.00115264
Q16795	Q16795	NADH dehydrogenase [ubiquinone] 1 alpha subcomplex subunit 9, mitochondrial	NDUFA9	IPQAIAQLSKEAGVEKFIHVSHLNANIKSSS	163	NaN	NaN	NaN	NaN	NaN	NaN	NaN	21.8012	NaN	NaN	NaN	NaN	NaN	NaN	K	3	___1	1	0.000393861
Q4G0N4-2;Q4G0N4;A0A0C4DGV3;B7Z8V7;Q4G0N4-3	Q4G0N4-2	NAD kinase 2, mitochondrial	NADK2	NRVATQAVEDVLNIAKRQGNLSLPLNRELVE	307	NaN	NaN	NaN	NaN	NaN	NaN	NaN	23.621	NaN	NaN	NaN	NaN	22.7934	NaN	K	2	___1	1	1.32793e-25
Q53GG5;A0A0A0MQY0;Q53GG5-2;Q53GG5-3	Q53GG5	PDZ and LIM domain protein 3	PDLIM3	DAQDRIKAAAHQLCLKIDRGETHLWSPQVSE	79	25.8765	21.4857	21.3596	21.7062	NaN	20.9183	NaN	25.1096	21.6204	24.8361	24.6173	20.7572	23.9932	23.2436	K	3	___1	1	4.26852e-10
Q53GG5	Q53GG5	PDZ and LIM domain protein 3	PDLIM3	STVSTICPGDLKVAAKLAPNIPLEMELPGVK	169	25.3597	26.3586	25.5055	27.4106	NaN	25.2306	NaN	24.6947	NaN	NaN	NaN	25.0028	25.328	24.8192	K	2	___1	1	6.52796e-10
Q53GG5;A0A0A0MQY0;Q53GG5-2;A0A087WYF8	Q53GG5	PDZ and LIM domain protein 3	PDLIM3	RTKPPEGYDTVTLYPKA______________	363	NaN	22.1139	NaN	22.6082	23.7423	22.4184	NaN	NaN	22.1112	NaN	21.9901	22.5817	NaN	NaN	K	2	___1	1	0.00290121
Q562R1	Q562R1	Beta-actin-like protein 2	ACTBL2	DRMQKEIITLAPSTMKIKIIAPPERKYSVWI	327	23.723	NaN	25.5768	26.766	25.7975	26.4479	24.9051	24.7655	NaN	25.958	26.0374	25.0217	26.3068	26.7437	K	3	___1	1	0.000297196
Q5BKX8	Q5BKX8	Muscle-related coiled-coil protein	MURC	YYVEESRSARLRKSGKEHIDNIKKAFSKENM	192	27.8962	NaN	NaN	NaN	NaN	NaN	NaN	26.3206	NaN	NaN	NaN	NaN	NaN	22.2886	K	2	___1	1	0.000116941
Q5BKX8	Q5BKX8	Muscle-related coiled-coil protein	MURC	RKVSAHIKDVKARVEKQQIHVKKVEVKQEEI	109	21.5581	NaN	NaN	NaN	NaN	NaN	NaN	21.7873	NaN	NaN	19.6739	20.8909	NaN	20.7048	K	3	___1	1	0.00452356
Q5BKX8	Q5BKX8	Muscle-related coiled-coil protein	MURC	EIMKKNKFRVVIFQEKFRCPTSLSVVKDRNL	138	NaN	22.1707	22.7166	23.498	23.6728	22.8348	23.2479	22.6323	NaN	23.1405	24.3946	NaN	24.4594	23.9981	K	2	___1	1	0.000363296
Q969E4;Q5H9L2	Q969E4	Transcription elongation factor A protein-like 3;Transcription elongation factor A protein-like 5	TCEAL3;TCEAL5	PASQAKPESQPRAAEKRPAEDYVPRKAKRKT	99	NaN	NaN	NaN	NaN	NaN	NaN	NaN	NaN	NaN	NaN	NaN	21.8203	NaN	NaN	K	3	___1	1	0.00170201
Q5JRX3;Q5JRX3-2;A0A0A0MRX9;Q5JRX3-3;H0Y4F7	Q5JRX3	Presequence protease, mitochondrial	PITRM1	DGDPVELLKLGNQLAKFRQCLQENPKFLQEK	473	NaN	21.6441	NaN	20.2281	20.8535	21.6697	22.0076	22.6852	NaN	22.9745	22.3539	NaN	22.0925	22.9627	K	2	___1	1	0.00219901
Q5JRX3;Q5JRX3-2;A0A0A0MRX9;Q5JRX3-3;B1APQ0	Q5JRX3	Presequence protease, mitochondrial	PITRM1	TLQSFGKAVDWAKSGKFTQQDIDEAKLSVFS	946	24.3189	24.8912	23.2571	20.7146	23.6886	23.9959	24.5023	25.5822	24.0201	24.5485	23.296	21.824	23.6806	24.9466	K	2	___1	1	8.08455e-29
Q5JRX3;Q5JRX3-2;A0A0A0MRX9;Q5JRX3-3;B1APQ0	Q5JRX3	Presequence protease, mitochondrial	PITRM1	CIRTVPYTDPDHASLKILARLMTAKFLHTEI	884	NaN	NaN	NaN	NaN	NaN	NaN	NaN	22.7499	NaN	NaN	NaN	NaN	NaN	NaN	K	3	___1	1	4.3897e-09
X6RGJ2;Q5SSJ5;B0QZK9;B0QZK8;Q5SSJ5-5	X6RGJ2	Heterochromatin protein 1-binding protein 3	HP1BP3	KALPLIVGAQLIHADKLGEKVEDSTMPIRRT	29	22.5273	NaN	NaN	NaN	NaN	NaN	NaN	22.4121	NaN	NaN	NaN	NaN	NaN	NaN	K	3	___1	1	7.11885e-14
S4R347;Q5T0N5-3;Q5T0N5-4;Q5T0N5-2;Q5T0N5-5;Q5T0N5	S4R347	Formin-binding protein 1-like	FNBP1L	DNSKKKFERECREAEKAQQSYERLDNDTNAT	149	28.3329	NaN	NaN	NaN	NaN	NaN	NaN	25.6018	NaN	NaN	NaN	NaN	NaN	NaN	K	2	___1	1	0.00113035
Q5T440	Q5T440	Putative transferase CAF17, mitochondrial	IBA57	TPGATVLTASGQTVGKFRAGQGNVGLALLWS	309	21.2663	NaN	NaN	NaN	NaN	NaN	NaN	22.0758	NaN	23.8563	NaN	NaN	NaN	NaN	K	3	___1	1	4.14969e-100
Q5VTT5;Q5VTT5-2	Q5VTT5	Myomesin-3	MYOM3	ESPVRSPRFAVLDLEKKKSYVFRVRAMNQYG	567	NaN	NaN	NaN	22.4465	NaN	22.7068	21.734	21.8073	NaN	21.7293	21.917	NaN	22.7302	22.2909	K	2	___1	1	0.00268033
Q6GMV3	Q6GMV3	Putative peptidyl-tRNA hydrolase PTRHD1	PTRHD1	IALRPYPKEEVGQYLKKFRLFK_________	134	21.9158	NaN	22.4346	21.8246	21.8426	21.9314	NaN	22.3397	NaN	22.0664	22.2819	22.565	22.2756	22.2089	K	2	___1	1	0.000411949
Q6IC98	Q6IC98	GRAM domain-containing protein 4	GRAMD4	QELDRERQRRMELEQKVQEVLKARTEEQMAQ	127	NaN	24.556	24.786	25.7147	25.3882	25.592	25.0861	20.628	23.0757	26.3921	25.0212	25.5656	23.2691	23.2338	K	2	___1	1	0.000249646
Q6NUK1-2;Q6NUK1	Q6NUK1-2	Calcium-binding mitochondrial carrier protein SCaMC-1	SLC25A24	TGQYSGIYDCAKKILKHEGLGAFYKGYVPNL	317	25.9932	NaN	NaN	NaN	NaN	NaN	NaN	26.3935	NaN	21.3978	21.8927	22.0107	22.7193	21.6066	K	3	___1	1	5.08229e-12
Q6NVY1;B9A058	Q6NVY1	3-hydroxyisobutyryl-CoA hydrolase, mitochondrial	HIBCH	RGHDFHEGVRAVLIDKDQSPKWKPADLKEVT	353	24.9389	24.3056	25.7151	24.8112	25.3248	26.6167	23.502	26.2002	24.0523	26.4119	27.0332	24.829	26.2261	26.257	K	2	___1	1	5.43834e-08
Q6NVY1;Q6NVY1-2;F8W8A6;B9A058;H7C1A5	Q6NVY1	3-hydroxyisobutyryl-CoA hydrolase, mitochondrial	HIBCH	SVLENYHTESKIDRDKSFILEEHMDKINSCF	257	21.5592	NaN	NaN	NaN	NaN	NaN	NaN	21.7179	NaN	NaN	NaN	NaN	NaN	NaN	K	3	___1	1	0.00044614
Q6NVY1;Q6NVY1-2;F8W8A6;B9A058	Q6NVY1	3-hydroxyisobutyryl-CoA hydrolase, mitochondrial	HIBCH	KENIASVLENYHTESKIDRDKSFILEEHMDK	252	NaN	NaN	NaN	NaN	NaN	NaN	NaN	21.3675	NaN	NaN	NaN	NaN	NaN	NaN	K	3	___1	1	0.000133229
Q6NVY1;Q6NVY1-2;B8ZZZ0	Q6NVY1	3-hydroxyisobutyryl-CoA hydrolase, mitochondrial	HIBCH	RMSKHTDAAEEVLLEKKGCTGVITLNRPKFL	42	NaN	NaN	NaN	NaN	NaN	NaN	NaN	23.0665	NaN	NaN	NaN	NaN	NaN	NaN	K	3	___1	1	6.44228e-05
Q6NVY1;Q6NVY1-2;F8W8A6	Q6NVY1	3-hydroxyisobutyryl-CoA hydrolase, mitochondrial	HIBCH	DSEKLAMLEEDLLALKSPSKENIASVLENYH	233	24.7486	NaN	23.5979	23.5205	23.2539	NaN	23.2542	25.576	NaN	26.9393	26.2605	22.5887	24.7308	24.1563	K	3	___1	1	1.40121e-53
Q6NVY1;Q6NVY1-2;B8ZZZ0	Q6NVY1	3-hydroxyisobutyryl-CoA hydrolase, mitochondrial	HIBCH	LEKKGCTGVITLNRPKFLNALTLNMIRQIYP	55	20.3234	NaN	NaN	NaN	NaN	NaN	NaN	22.1041	NaN	NaN	NaN	NaN	NaN	NaN	K	2	___1	1	3.53167e-05
Q6NVY1;Q6NVY1-2;B8ZZZ0	Q6NVY1	3-hydroxyisobutyryl-CoA hydrolase, mitochondrial	HIBCH	NALTLNMIRQIYPQLKKWEQDPETFLIIIKG	73	26.7802	23.331	25.0155	25.3061	25.1608	26.4499	22.5167	27.357	23.7604	26.213	26.7565	26.0293	26.7028	27.1669	K	2	___1	1	0.00771672
Q6NVY1;Q6NVY1-2;F8W8A6;B9A058;H7C1A5	Q6NVY1	3-hydroxyisobutyryl-CoA hydrolase, mitochondrial	HIBCH	QDGSSFALEQLKVINKMSPTSLKITLRQLME	301	26.6645	NaN	25.4016	26.3577	25.7919	28.2509	25.7735	26.9388	24.1278	27.6769	27.7946	26.2245	27.2311	27.116	K	2	___1	1	1.20878e-05
Q6NZI2	Q6NZI2	Polymerase I and transcript release factor	PTRF	SKLGKAHATTSNTVSKLLEKVRKVSVNVKTV	109	NaN	NaN	NaN	NaN	NaN	NaN	NaN	NaN	NaN	NaN	NaN	21.3327	NaN	20.1183	K	3	___1	1	3.15569e-05
Q6NZI2	Q6NZI2	Polymerase I and transcript release factor	PTRF	NFKVMIYQDEVKLPAKLSISKSLKESEALPE	165	22.827	NaN	NaN	24.2751	22.9288	23.1357	22.6903	23.4239	NaN	21.4145	23.2929	NaN	22.9837	23.7079	K	2	___1	1	0.00308013
[truncated: 333 more rows]
