# Supplementary material for: High-intensity interval training remodels the proteome and acetylome of human skeletal muscle
Source: eLife. 2022 May 31;11:e69802. doi: 10.7554/eLife.69802 (PMC9154743; doi:10.7554/eLife.69802)
Supplement: Supplementary file 5. [file elife-69802-supp5.xlsx]

## Sheet: Supp_File5_Acetylome_Quantified
Proteins	Leading proteins	Protein names	Gene names	Sequence window	Position	Pre_1	Pre_3	Pre_4	Pre_5	Pre_6	Pre_7	Pre_8	Post_1	Post_3	Post_4	Post_5	Post_6	Post_7	Post_8	Amino acid	Charge	Multiplicity	Localization prob	PEP	Student's T-test Significant Post_Pre	Xiao_sig	Student's T-test -Log10 p-value Post_Pre	Student's T-test q-value Post_Pre	Log2 Fold Change Post_Pre	Student's T-test Test statistic Post_Pre	Xiao value
P18859;P18859-2	P18859	ATP synthase-coupling factor 6. mitochondrial	ATP5J	KQMFGNADMNTFPTFKFEDPKFEVIEKPQA_	94	23.4922	19.8807	19.637	20.2873	19.5516	19.3448	19.1102	27.1386	21.4781	27.7502	25.7549	23.83	23.9016	21.6531	K	3	___1	1	2.56e-77	+	+	2.77997	0.021	4.31467	4.80144	1.01e-12		Proteins	UniProtKB Accession Numbers
P31930	P31930	Cytochrome b-c1 complex subunit 1. mitochondrial	UQCRC1	GDIVQNCSLEDSQIEKERDVILREMQENDAS	163	24.9462	19.1615	19.8575	20.5168	19.9379	18.5427	19.7187	26.424	20.7368	25.9503	23.4604	23.7009	24.1308	23.4202	K	3	___1	1	1.41e-177	+	+	2.74055	0.014	3.59173	4.6239	1.43e-10		Leading proteins	UniProtKB Accession Numbers of the Leading Proteins
Q13642-5;Q13642-4;Q5JXI2	Q13642-5	Four and a half LIM domains protein 1	FHL1	RHSGPSSYKVGTMAEKFDCHYCRDPLQGKKY	20	27.4094	19.3372	20.4775	18.5539	21.0443	19.4929	18.6216	27.438	23.8416	26.1165	26.1597	23.9626	22.4149	23.8443	K	3	___1	1	1.41e-08	+	+	2.37995	0.0206154	4.12011	4.04488	1.56e-10		Protein names	Protein names
A0A0C4DFU2;P04179-4;P04179;F5H3C5;F5H4R2;A0A0C4DFU1;F5GYZ5;P04179-2;G8JLJ2;A0A0C4DG56;P04179-3;G5E9P6;F5GXZ9	A0A0C4DFU2	Superoxide dismutase;Superoxide dismutase [Mn]. mitochondrial	SOD2	NNLNVTEEKYQEALAKGDVTAQIALQPALKF	75	19.8252	19.154	19.1795	20.1396	19.6049	23.2987	19.6815	23.0812	19.499	25.0869	24.32	23.6778	25.7011	25.4341	K	3	___1	1	2.66e-33	+	+	2.63113	0.0135	3.70239	4.44236	1.81e-10		Gene names	Gene names
O75947;O75947-2	O75947	ATP synthase subunit d. mitochondrial	ATP5H	DQMTIEDLNEAFPETKLDKKKYPYWPHQPIE	144	21.5817	20.5041	19.1967	19.1883	18.2722	20.2261	19.179	22.5441	19.9497	27.6757	27.7928	25.9236	23.8153	24.2684	K	3	___1	1	1.21e-40		+	1.87999	0.0534359	4.83164	3.244	8.25e-10		Sequence window	Amino acid sequence window (+/- 15 from ac-K)
P08559;P08559-2;P08559-4;P08559-3;Q5JPU3	P08559	Pyruvate dehydrogenase E1 component subunit alpha. somatic form. mitochondrial	PDHA1	KDRMVNSNLASVEELKEIDVEVRKEIEDAAQ	336	24.5637	20.5675	19.8939	19.4678	18.335	20.7227	19.7593	26.4133	19.3953	26.6404	26.2879	25.7549	25.3864	24.3073	K	3	___1	1	2.18e-253	+	+	2.02148	0.0395714	4.4108	3.45558	1.21e-09		Position	ac-K amino acid position
P10809	P10809	60 kDa heat shock protein. mitochondrial	HSPD1	LVLNRLKVGLQVVAVKAPGFGDNRKNQLKDM	301	19.0283	19.8257	18.9415	18.934	18.387	20.2994	20.3388	20.6979	21.4319	23.2209	21.824	22.6381	22.7734	22.5345	K	3	___1	1	1.52e-41	+	+	3.22133	0.012	2.76657	5.30296	1.22e-09		Values	Log2 Intensity
A2A274;Q99798	A2A274	Aconitate hydratase. mitochondrial	ACO2	LTIQGLKDFTPGKPLKCIIKHPNGTQETILL	764	28.353	20.0023	25.3192	23.8603	20.7367	24.1729	19.3996	27.8734	24.1392	27.3537	27.7905	28.708	28.6855	28.3312	K	2	___1	1	0.00128691		+	1.95508	0.053625	4.43393	3.34725	2.14e-09		Amino acid	Acetylated amino acid
Q86WA6-2;Q86WA6	Q86WA6-2	Valacyclovir hydrolase	BPHL	LLPRVQCPALIVHGEKDPLVPRFHADFIHKH	226	23.7013	19.3886	19.0575	18.8444	21.2609	18.959	21.0912	24.7078	23.3047	25.3762	24.2703	23.493	23.5411	22.3748	K	3	___1	1	3.85e-07	+	+	2.39624	0.0245333	3.53786	4.00829	3.33e-09		Charge	Peptide charge
Q13642-5;Q13642-4;Q13642-1;Q5JXI2;Q5JXI8;Q13642;A0A0D9SFZ9;Q5JXH8;Q5JXH7;Q5JXI3;Q13642-3;A0A0D9SFI6;A0A0D9SFB0;Q5JXH9;A0A0D9SGB2;Q5JXI0;A0A0D9SG53	Q13642-5	Four and a half LIM domains protein 1	FHL1	CLHPLANETFVAKDNKILCNKCTTREDSPKC	102	24.0982	18.5204	18.2669	19.5178	19.1379	18.8792	18.5743	23.6033	22.2635	21.0449	22.7778	23.7142	22.4057	23.2747	K	2	___1	1	0.00252034	+	+	2.51026	0.0189091	3.15563	4.14507	1.2e-08		Multiplicity	Number of acetylated residues on peptide
P55809;E9PDW2;P55809-2	P55809	Succinyl-CoA:3-ketoacid coenzyme A transferase 1. mitochondrial	OXCT1	TMEHSAKGNAHKIMEKCTLPLTGKQCVNRII	455	19.3547	19.6331	18.4517	19.6253	23.4857	22.2218	20.3051	21.4124	22.0718	23.1322	23.0502	24.3124	24.2378	23.3795	K	2	___1	1	2.46e-12	+	+	2.90234	0.0168	2.64556	4.69438	2.1e-08		Localization prob	Localization probability
Q9NSE4	Q9NSE4	Isoleucine--tRNA ligase. mitochondrial	IARS2	LHLLQDLANKITELYKQYDFGKVVRLLRTFY	775	17.4841	19.0596	19.0233	20.2308	19.7634	19.5191	20.1562	23.8258	21.3451	24.2132	22.5885	22.529	21.7223	21.129	K	2	___1	1	3.68e-10	+	+	2.34736	0.02825	3.15949	3.87386	3.83e-08		PEP	Posterior error probability - probability of a false hit
P13929;P13929-2;E5RGZ4;P13929-3	P13929	Beta-enolase;Enolase	ENO3	LELLKTAIQAAGYPDKVVIGMDVAASEFYRN	239	22.6492	18.7048	17.5998	19.0762	20.3855	19.4319	18.1268	23.1428	19.6146	24.2838	24.8365	24.6495	23.5099	20.4011	K	3	___1	1	4.09e-28	+	+	2.1069	0.0342222	3.49486	3.52321	4.33e-08		Student's T-test Significant Post_Pre	FDR < 0.05 Post v Pre
P07954-2;P07954	P07954-2	Fumarate hydratase. mitochondrial	FH	ISNRAIEMLGGELGSKIPVHPNDHVNKSQSS	129	25.6132	17.8972	19.8231	19.4833	23.1527	20.3407	19.3299	27.4829	19.9877	26.151	24.2985	23.4936	23.5092	22.6015	K	4	___1	1	3.23e-22	+	+	2.23379	0.028	3.12633	3.68417	1.04e-07		Xiao_sig	Π < 0.05 Post v Pre
P50213-2;P50213;H0YMU3;H0YLI6;H0YKD0	P50213-2	Isocitrate dehydrogenase [NAD] subunit alpha. mitochondrial	IDH3A	KESMDKNKMGLKGPLKTPIAAGHPSMNLLLR	22	24.0098	19.5687	26.6959	24.5746	26.4033	24.8042	25.0522	26.8658	24.707	29.1299	27.1528	27.2264	27.7687	26.3277	K	3	___1	1	3.5e-14	+	+	2.57406	0.02	2.58137	4.12984	2.27e-07		Student's T-test -Log10 p-value Post_Pre	Paired t-test p-value Post v Pre (-Log10)
P61604;B8ZZL8;S4R3N1	P61604	10 kDa heat shock protein. mitochondrial	HSPE1;HSPE1-MOB4	________MAGQAFRKFLPLFDRVLVERSAA	8	20.0164	19.5377	22.6489	22.174	20.4104	22.5632	19.6498	22.3547	19.961	25.1327	24.4136	23.2881	24.3467	23.761	K	2	___1	1	0.00158703	+	+	2.82721	0.0154286	2.32249	4.45915	2.72e-07		Student's T-test q-value Post_Pre	Paired t-test q-value Post v Pre (permutatioin-based FDR)
P07451	P07451	Carbonic anhydrase 3	CA3	ALDKIKTKGKEAPFTKFDPSCLFPACRDYWT	177	25.6496	20.8602	18.4699	20.8241	19.9986	18.6397	20.3018	27.1008	19.5376	26.5631	25.7023	23.7827	24.4644	23.2163	K	3	___1	1	1.35e-57		+	1.71251	0.0770625	3.66047	2.91502	5.39e-07		Log2 Fold Change Post_Pre	Paired t-test fold change Post v Pre (-Log2)
E9PN17;O75964;Q7Z4Y8	E9PN17	ATP synthase subunit g. mitochondrial;ATP synthase subunit g 2. mitochondrial	ATP5L;ATP5L2	VPPTPAEIPRAIQSLKKIVNSAQTGSFKQLT	54	30.1906	19.3713	19.1908	19.4026	21.1284	29.8908	19.4628	31.4234	28.3694	25.9923	25.9694	19.4577	29.6169	29.995	K	3	___1	1	6.62e-133		+	1.35562	0.129983	4.59811	2.40683	5.84e-07		Student's T-test Test statistic Post_Pre	Paired t-test test statistic Post v Pre
P30049	P30049	ATP synthase subunit delta. mitochondrial	ATP5D	RAEIQIRIEANEALVKALE____________	165	26.3244	26.2306	27.4397	20.3985	23.7497	26.7704	20.2775	26.7779	28.2847	28.5703	27.2754	28.202	28.7148	28.2182	K	2	___1	1	5.34e-12		+	1.73529	0.0767097	3.55036	2.9428	6.9e-07		Xiao value	Π-value
P53597;H7C233	P53597	Succinyl-CoA ligase [ADP/GDP-forming] subunit alpha. mitochondrial	SUCLG1	SYTASRQHLYVDKNTKIICQGFTGKQGTFHS	57	23.6841	23.1458	22.9445	22.8153	22.3771	23.0939	22.7132	25.2137	23.8882	25.2005	24.746	25.6629	24.929	24.4845	K	2	___1	1	5.66e-30	+	+	3.22266	0.018	1.90727	4.88348	7.14e-07
Q99497;K7ELW0;K7EN27	Q99497	Protein deglycase DJ-1	PARK7	SRDVVICPDASLEDAKKEGPYDVVVLPGGNL	62	25.0964	19.5227	22.0906	22.3685	22.8339	21.4343	20.065	25.5929	23.9218	25.6974	24.6647	23.4636	24.073	24.9061	K	2	___1	1	8.18e-16	+	+	2.23193	0.0315	2.70116	3.6142	9.36e-07
A0A286YFB1;C9JZN9;P45378-4;H9KVA2;F8WA37;P45378-5;P45378-7;P45378-6;P45378-2;P45378-3;P45378;C9JCA5	A0A286YFB1;C9JZN9;H9KVA2	Troponin T. fast skeletal muscle	TNNT3	RREEEDAKRRAEDDLKKKKALSSMGANYSSY	123	28.0759	25.9707	24.6883	26.8218	25.7306	25.1911	23.7888	26.8647	18.8551	18.3674	24.9983	18.9428	23.0508	24.0956	K	2	___1	1	0.00327978		+	1.67506	0.0813521	-3.58464	-2.85277	9.9e-07
P14621;U3KQL2;U3KPX8	P14621	Acylphosphatase-2	ACYP2	SRIDRTNFSNEKTISKLEYSNFSIRY_____	89	24.3487	19.3854	25.8611	23.3348	19.9648	20.3842	19.0609	24.6651	23.9287	27.9257	26.8991	19.9911	25.9867	24.4246	K	2	___1	1	1.2e-15		+	1.90171	0.0631628	3.06873	3.15666	1.46e-06
P13804;P13804-2;H0YLU7;H0YK49;H0YL12;H0YKF0;H0YNX6	P13804	Electron transfer flavoprotein subunit alpha. mitochondrial	ETFA	GASAFGKNLLPRVAAKLEVAPISDIIAIKSP	126	23.3331	19.0573	18.8908	21.5577	19.5894	22.0843	19.6683	23.6816	22.878	26.8377	22.8061	23.8024	24.4432	21.9439	K	2	___1	1	1.17e-11		+	1.81773	0.0694074	3.17314	3.03891	1.71e-06
E7EPT4;P19404	E7EPT4	NADH dehydrogenase [ubiquinone] flavoprotein 2. mitochondrial	NDUFV2	EDLTAKDIEEIIDELKAGKIPKPGPRSGRFS	212	22.1602	19.3831	18.3522	20.3219	20.3793	19.0618	18.7475	22.557	20.6988	25.6652	25.4121	23.4946	21.1004	21.1104	K	2	___1	1	1.9e-20		+	1.86078	0.0667755	3.09036	3.09648	1.78e-06
O75380	O75380	NADH dehydrogenase [ubiquinone] iron-sulfur protein 6. mitochondrial	NDUFS6	GGGALGHPKVYINLDKETKTGTCGYCGLQFR	105	19.3312	19.7068	19.5928	18.3568	22.1015	18.3046	18.9949	21.2932	21.4087	20.4754	21.9865	23.1413	20.7448	23.0055	K	2	___1	1	0.000164752	+	+	2.56765	0.0242857	2.23811	4.02107	1.79e-06
P49748;P49748-3;P49748-2	P49748	Very long-chain specific acyl-CoA dehydrogenase. mitochondrial	ACADVL	DAASIRTSAVPSPCGKYYTLNGSKLWISNGG	239	22.505	20.7999	21.4487	21.6784	19.2862	22.464	20.1344	22.6408	23.6521	24.4937	23.844	24.2087	23.627	23.1442	K	3	___1	1	2.44e-19	+	+	2.28077	0.0295652	2.47056	3.64381	2.32e-06
Q5QNW6;Q5QNW6-2	Q5QNW6	Histone H2B type 2-F	HIST2H2BF	PDPAKSAPAPKKGSKKAVTKVQKKDGKKRKR	17	22.9263	19.4049	19.1554	20.3762	19.5691	19.3434	20.5949	23.2115	23.9496	21.3472	22.1066	23.2562	21.8541	22.2079	K	2	___2	1	0.00443247	+	+	2.36624	0.0272	2.36613	3.74958	2.52e-06
A0A0B4J2D5;A0A096LPI6;P30042;A0A096LNH5;H7C2G3;A0A096LP73;F2Z2Q0;A0A096LP12	A0A0B4J2D5	ES1 protein homolog. mitochondrial	C21orf33	GFGAAKNLSTFAVDGKDCKVNKEVERVLKEF	151	18.8	19.4517	18.5462	19.6536	20.2479	19.2419	18.7334	23.4179	20.8597	22.2021	21.1304	20.2262	22.1282	22.0624	K	2	___1	1	2.81e-12	+	+	2.20325	0.0355385	2.47889	3.52796	3.45e-06
P50990;P50990-2;P50990-3	P50990	T-complex protein 1 subunit theta	CCT8	MDDIERAVDDGVNTFKVLTRDKRLVPGGGAT	400	23.8117	19.0296	20.095	20.3787	21.0712	19.2153	26.0201	24.0893	20.0874	25.8696	26.226	25.3625	25.3546	25.6345	K	2	___1	1	7.26e-21		+	1.63637	0.0875897	3.28604	2.77411	4.2e-06
P00505;P00505-2	P00505	Aspartate aminotransferase. mitochondrial	GOT2	MGLYGERVGAFTMVCKDADEAKRVESQLKIL	296	25.5372	23.2996	23.4532	22.8501	23.8436	24.5157	22.3312	25.9512	25.5574	25.8785	24.9431	26.207	25.7291	26.6803	K	2	___1	1	3.6e-41	+	+	2.47848	0.0303529	2.15943	3.86053	4.45e-06
P50213-2;P50213;H0YL72;H0YNF5;H0YM46	P50213-2	Isocitrate dehydrogenase [NAD] subunit alpha. mitochondrial	IDH3A	FDHAARIEAACFATIKDGKSLTKDLGGNAKC	258	23.4718	21.3639	22.1178	20.7416	20.8852	22.2918	20.3103	23.9499	23.49	24.5513	22.2706	22.8998	23.5265	23.6638	K	2	___1	1	9.89e-16	+	+	2.78692	0.0172	1.88136	4.20756	5.71e-06
Q5QNZ2;P24539	Q5QNZ2	ATP synthase F(0) complex subunit B1. mitochondrial	ATP5F1	VVQSISTQQEKETIAKCIADLKLLAKKAQAQ	177	23.9654	19.4494	19.8205	18.8401	19.4298	19.7408	17.9145	25.0096	24.7103	22.4782	21.4069	20.4227	20.8361	25.4647	K	2	___1	1	0.000538873		+	1.72836	0.0762388	3.024	2.8906	5.94e-06
P04075;J3KPS3;P04075-2;H3BQN4;H3BPS8;H3BR04;H3BU78	P04075	Fructose-bisphosphate aldolase A;Fructose-bisphosphate aldolase	ALDOA	YKKDGADFAKWRCVLKIGEHTPSALAIMENA	153	21.5436	19.278	20.3346	19.6662	19.2644	18.7395	20.8389	22.5395	19.5791	24.5451	25.4119	23.3149	23.6117	21.0088	K	3	___1	1	2.42e-104		+	1.77732	0.0782667	2.90654	2.95217	6.83e-06
O75947;O75947-2	O75947	ATP synthase subunit d. mitochondrial	ATP5H	EKEDVKSCAEWVSLSKARIVEYEKEMEKMKN	109	25.4762	19.052	20.3811	19.7173	20.0883	20.1109	19.465	25.3323	18.5166	24.6692	23.4666	23.7471	24.1442	23.595	K	2	___1	1	8.72e-23		+	1.85113	0.070717	2.74003	3.043	8.47e-06
Q5QNW6;Q5QNW6-2	Q5QNW6	Histone H2B type 2-F	HIST2H2BF	KSAPAPKKGSKKAVTKVQKKDGKKRKRSRKE	21	22.9263	19.7352	19.782	20.7013	20.7044	19.3455	20.0635	23.2115	23.9496	21.2931	22.1066	23.2562	21.8541	22.2079	K	2	___2	1	0.00443247	+	+	2.39635	0.0293333	2.08869	3.71634	9.88e-06
P55201-3;P55201;P55201-2	P55201-3	Peregrin	BRPF1	TPAHEVGRRTSVLFSKKNPKTAGPPKRPGRP	895	20.2486	19.5158	19.0382	20.8104	19.9259	19.2986	20.2626	21.513	20.4074	21.8287	21.9879	21.2905	22.0835	21.8274	K	2	___1	1	0.00645978	+	+	2.92562	0.0133333	1.69119	4.30015	1.13e-05
Q9Y277;Q9Y277-2;E5RFP6;E5RJN6;E5RHZ6;E5RHE1;E5RFL1	Q9Y277	Voltage-dependent anion-selective channel protein 3	VDAC3	____MCNTPTYCDLGKAAKDVFNKGYGFGMV	12	18.8127	19.9082	20.0689	18.0517	19.7111	21.1797	18.3954	20.1412	23.5558	22.2418	21.5038	19.9173	22.2187	23.3601	K	2	___1	1	0.000231085		+	2.02853	0.0548421	2.40157	3.25334	1.34e-05
P68032;P62736;P63267;P63267-2;P68133	P68032;P68133	Actin. alpha cardiac muscle 1;Actin. aortic smooth muscle;Actin. gamma-enteric smooth muscle;Actin. alpha skeletal muscle	ACTC1;ACTA2;ACTG2;ACTA1	FVTTAEREIVRDIKEKLCYVALDFENEMATA	217	19.8225	19.5706	18.0816	22.3657	20.1208	19.3953	19.2064	23.9335	18.8915	24.7911	25.7989	24.1964	19.4633	21.8448	K	3	___1	1	2.34e-164		+	1.6396	0.0881951	2.90809	2.74875	1.71e-05
P38646	P38646	Stress-70 protein. mitochondrial	HSPA9	AEGIIHDTETKMEEFKDQLPADECNKLKEEI	600	22.6556	21.2119	21.8626	21.6726	21.9632	23.2995	17.4356	24.3024	21.4763	25.9753	24.9885	23.5693	24.5503	24.1713	K	2	___1	1	1.21e-62		+	1.76045	0.0761846	2.70463	2.90524	1.73e-05
P00505;P00505-2	P00505	Aspartate aminotransferase. mitochondrial	GOT2	MGLYGERVGAFTMVCKDADEAKRVESQLKIL	296	25.2213	19.0166	21.746	19.4771	23.0909	23.1858	20.8597	25.9171	19.9633	27.3294	23.4206	23.64	25.3427	24.8381	K	2	___2	1	3.6e-41		+	1.84979	0.0682069	2.55054	3.01615	1.91e-05
P08237;P08237-2;P08237-3	P08237	ATP-dependent 6-phosphofructokinase. muscle type	PFKM	FTIRDLQANVEHLVQKMKTTVKRGLVLRNEK	615	23.1939	19.5155	19.3584	19.8034	19.8519	18.1397	19.0299	24.8217	19.8108	22.749	22.2234	21.0014	19.6419	21.684	K	3	___1	1	6.67e-05	+	+	2.50666	0.0271579	1.86279	3.79365	2.14e-05
P40939	P40939	Trifunctional enzyme subunit alpha. mitochondrial;Long-chain enoyl-CoA hydratase;Long chain 3-hydroxyacyl-CoA dehydrogenase	HADHA	DMMLTGRSIRADRAKKMGLVDQLVEPLGPGL	214	19.529	20.1447	19.5935	18.7926	18.524	20.4082	19.3428	21.5301	19.4728	24.3765	22.2425	19.9901	23.2062	21.921	K	3	___2	1	8.15e-23		+	1.96476	0.0639091	2.34349	3.15002	2.49e-05
P02545;P02545-6;P02545-3;P02545-2;Q3BDU5	P02545	Prelamin-A/C;Lamin-A/C	LMNA	DSVAKERARLQLELSKVREEFKELKARNTKK	108	21.9348	18.9946	22.7974	24.3222	23.5517	22.936	23.4893	22.3213	19.7306	19.0042	18.8307	20.0255	19.0602	19.9523	K	2	___1	1	0.000637031		+	1.66134	0.0879	-2.72874	-2.76334	2.93e-05
P00505;P00505-2	P00505	Aspartate aminotransferase. mitochondrial	GOT2	RVGAFTMVCKDADEAKRVESQLKILIRPMYS	302	25.2213	19.3167	21.746	19.6021	23.0909	23.1858	20.8597	25.9171	20.0593	27.3294	23.4206	23.64	25.3427	24.8381	K	2	___2	1	3.6e-41		+	1.80269	0.076127	2.50353	2.94128	3.07e-05
H0YL11;P48735;P48735-2	H0YL11;P48735	Isocitrate dehydrogenase [NADP]. mitochondrial	IDH2	AYDGRFKDIFQEIFDKHYKTDFDKNKIWYEH	272	29.5009	18.2199	19.8717	20.9636	22.4657	20.2978	20.9481	28.6168	19.0563	25.2395	25.9426	24.1238	23.7783	24.1507	K	3	___1	1	2.18e-12		+	1.68723	0.0838961	2.6629	2.79391	3.21e-05
P08590	P08590	Myosin light chain 3	MYL3	KEAFMLFDRTPKCEMKITYGQCGDVLRALGQ	70	23.7543	19.2761	17.9401	21.1703	19.5504	21.5337	19.2562	22.5377	21.6698	24.4881	23.2407	21.7568	24.0268	23.787	K	2	___1	1	7.22e-33		+	1.62457	0.0964337	2.71797	2.70892	3.84e-05
P30048-2;P30048	P30048-2	Thioredoxin-dependent peroxide reductase. mitochondrial	PRDX3	QAPYFKGTAVVNGEFKDLSLDDFKGKYLVLF	65	24.1689	24.5079	24.1085	19.3961	26.1308	24.8723	19.1122	26.1943	24.3386	28.4917	26.2361	26.3128	25.9004	25.873	K	3	___1	1	2.59e-94		+	1.42645	0.124211	3.00717	2.44494	5.13e-05
Q9UIJ7;Q9UIJ7-3;Q9UIJ7-2	Q9UIJ7	GTP:AMP phosphotransferase AK3. mitochondrial	AK3	KAYEDQTKPVLEYYQKKGVLETFSGTETNKI	189	27.4438	22.0455	21.618	19.4562	24.7498	21.9095	21.2251	28.0535	23.3148	25.1871	25.0228	25.4844	24.4854	23.0486	K	2	___1	1	4.32e-16		+	1.85695	0.0705763	2.30696	2.98914	5.2e-05
Q13423;D6RAI5;D6RHU2	Q13423	NAD(P) transhydrogenase. mitochondrial	NNT	QGFNVVVESGAGEASKFSDDHYRVAGAQIQG	100	22.5849	20.1342	19.5405	20.3558	21.3439	19.7182	19.2411	25.675	18.3545	25.8977	24.9107	23.472	22.449	21.3248	K	3	___1	1	1.33e-90		+	1.55678	0.11209	2.73787	2.61285	5.47e-05
P07954-2;P07954	P07954-2	Fumarate hydratase. mitochondrial	FH	FKIGGVTERMPTPVIKAFGILKRAAAEVNQD	51	19.9313	19.7402	18.7891	19.4122	18.8971	19.1887	19.3165	24.5616	18.9634	25.6256	19.421	25.1141	19.168	24.3431	K	3	___1	1	9.14e-10		+	1.35341	0.141581	3.13167	2.34602	5.78e-05
P10606	P10606	Cytochrome c oxidase subunit 5B. mitochondrial	COX5B	HKGEAQRCPRCGAHYKLVPQQLAH_______	121	27.4778	18.617	18.622	21.0633	22.7581	22.3107	18.6773	27.5388	19.8026	27.9467	25.8832	21.0649	25.7483	25.5078	K	3	___1	1	1.67e-36		+	1.23034	0.169665	3.42373	2.17938	6.13e-05
P48735;P48735-2	P48735	Isocitrate dehydrogenase [NADP]. mitochondrial	IDH2	LDGNQDLIRFAQMLEKVCVETVESGAMTKDL	400	26.6792	21.0922	24.7794	24.3786	26.4241	27.3253	26.7257	28.2695	27.0898	29.9251	27.9068	26.4044	28.6371	27.4246	K	3	___1	1	2.05e-50		+	1.61144	0.100558	2.60754	2.6787	6.28e-05
P07954-2;P07954	P07954-2	Fumarate hydratase. mitochondrial	FH	NQDYGLDPKIANAIMKAADEVAEGKLNDHFP	79	25.0366	22.8439	23.32	22.5872	25.9364	25.5701	23.9319	26.9692	26.041	27.065	25.3276	25.6423	26.2075	26.2814	K	2	___1	1	2.7e-47		+	2.03884	0.0600976	2.04399	3.19243	6.8e-05
Q10713-2;Q10713	Q10713-2	Mitochondrial-processing peptidase subunit alpha	PMPCA	VDIDRSVAQYTGGIAKLERDMSNVSLGPTPI	168	21.6319	18.5933	21.9181	19.9714	19.9655	21.897	19.7098	23.7622	21.519	24.5937	22.8705	20.2512	21.7665	22.5516	K	2	___1	1	1.31e-05		+	2.1129	0.0530811	1.94681	3.27006	7.7e-05
H0YL11;P48735;P48735-2	H0YL11;P48735	Isocitrate dehydrogenase [NADP]. mitochondrial	IDH2	FVADRAGTFKMVFTPKDGSGVKEWEVYNFPA	199	28.3378	27.0665	28.1249	26.7537	27.5709	28.3054	27.4394	28.8283	27.95	29.1485	27.8401	28.6438	29.0177	28.4596	K	2	___1	1	2.64e-71	+	+	4.39903	0.02	0.898486	4.87861	0.000111479
A0A0C4DFU2;P04179-4;P04179;F5H3C5;F5H4R2;A0A0C4DFU1;F5GYZ5;P04179-2;G8JLJ2;A0A0C4DG56;P04179-3;G5E9P6;F5GXZ9	A0A0C4DFU2	Superoxide dismutase;Superoxide dismutase [Mn]. mitochondrial	SOD2	KHHAAYVNNLNVTEEKYQEALAKGDVTAQIA	68	29.8861	19.7582	22.7599	23.6333	23.7824	22.2901	19.4101	30.4903	18.8829	26.2805	27.3149	26.4115	24.1001	24.9738	K	3	___1	1	9.44e-135		+	1.62126	0.101057	2.41913	2.67129	0.000119666
P40939	P40939	Trifunctional enzyme subunit alpha. mitochondrial;Long-chain enoyl-CoA hydratase;Long chain 3-hydroxyacyl-CoA dehydrogenase	HADHA	ESKALMGLYHGQVLCKKNKFGAPQKDVKHLA	350	21.9073	19.6753	19.0265	19.8078	20.2091	19.5605	18.8436	24.1868	20.8392	24.0994	22.901	19.6814	21.4452	20.9575	K	3	___1	1	8.53e-06		+	1.79683	0.0779412	2.15434	2.87817	0.000134587
P78417;Q5TA02;P78417-3;P78417-2;Q5TA01	P78417	Glutathione S-transferase omega-1	GSTO1	RLEAMKLNECVDHTPKLKLWMAAMKEDPTVS	198	19.4924	20.1898	18.9287	20.4792	19.847	19.2225	19.7421	23.3608	20.4222	19.6215	22.1888	22.4287	20.4826	22.3376	K	3	___1	1	0.000130961		+	2.09244	0.0572	1.84864	3.21331	0.000135462
Q96DC8;Q5W0J8	Q96DC8	Enoyl-CoA hydratase domain-containing protein 3. mitochondrial	ECHDC3	ARQLDGIRNIVLSNPKKRNALSLAMLKSLQS	65	20.6208	19.7204	21.0779	21.6955	21.8944	23.1726	20.096	23.0241	23.1185	22.803	22.5405	23.9906	22.8119	23.0643	K	2	___1	1	0.00421932		+	2.06889	0.0590476	1.8679	3.18697	0.000136625
P30038;P30038-2;P30038-3;Q5TF55	P30038	Delta-1-pyrroline-5-carboxylate dehydrogenase. mitochondrial	ALDH4A1	IDAAAELIDFFRFNAKYAVELEGQQPISVPP	175	19.6845	19.8261	19.2724	20.3074	24.2872	24.7008	22.5651	21.1469	19.8588	24.619	24.6886	24.3361	26.529	25.8894	K	3	___1	1	6.74e-68		+	1.61675	0.104409	2.34633	2.65586	0.000160902
P55084;P55084-2;B5MD38;C9JEY0;C9JE81;C9K0M0	P55084	Trifunctional enzyme subunit beta. mitochondrial;3-ketoacyl-CoA thiolase	HADHB	VDGVRTPFLLSGTSYKDLMPHDLARAALTGL	72	27.1971	20.7379	23.2311	24.2219	25.9413	25.6674	24.0816	28.202	23.6645	28.6717	27.4294	25.9047	26.5912	25.9942	K	3	___1	1	1.48e-70		+	1.71353	0.086481	2.19706	2.76961	0.000171901
P49189;P49189-2	P49189	4-trimethylaminobutyraldehyde dehydrogenase	ALDH9A1	CCNGTRVFVQKEILDKFTEEVVKQTQRIKIG	303	20.7331	22.7862	23.6736	24.6399	21.8205	23.9657	23.4777	24.797	24.5028	25.2708	25.0581	24.9481	24.7862	24.6137	K	2	___1	1	4.74e-12		+	2.01029	0.0684255	1.84	3.09955	0.00020002
P18859;P18859-2	P18859	ATP synthase-coupling factor 6. mitochondrial	ATP5J	NADMNTFPTFKFEDPKFEVIEKPQA______	99	27.7223	26.2242	26.5019	27.1191	28.1116	27.4281	25.964	28.627	28.1833	28.4773	27.7514	29.7648	27.8412	28.482	K	2	___1	1	1.24e-06	+	+	2.52415	0.03024	1.43654	3.59957	0.000236568
C9JF17;P05090	C9JF17	Apolipoprotein D	APOD	VDSLKNILTSNNIDVKKMTVTDQVNCPK___	203	19.5077	19.632	19.7564	18.3066	19.0458	19.0085	20.5084	20.8885	19.6559	20.6892	20.7816	21.782	20.9805	21.8404	K	2	___1	1	0.000225357	+	+	2.33782	0.044	1.55039	3.4242	0.000237394
A0A0G2JIW1;P0DMV9;P0DMV8;P0DMV8-2;V9GZ37;P17066	A0A0G2JIW1;P17066	Heat shock 70 kDa protein 1B;Heat shock 70 kDa protein 1A;Heat shock 70 kDa protein 6	HSPA1B;HSPA1A;HSPA6	DKSTGKANKITITNDKGRLSKEEIERMVQEA;DRSTGKANKITITNDKGRLSKEEVERMVHEA	508	23.1373	23.6467	22.6865	24.6342	21.9039	22.9481	19.7016	23.8765	18.3133	20.3282	19.0156	19.4475	22.371	18.3272	K	2	___1	1	0.000363379		+	1.46523	0.125766	-2.42557	-2.45253	0.000279236
M0QZ10;M0QXF9;O15382	M0QZ10	Branched-chain-amino-acid aminotransferase;Branched-chain-amino-acid aminotransferase. mitochondrial	BCAT2	SSSFKAADLQLEMTQKPHKKPGPGEPLVFGK	44	23.3936	23.0895	22.7359	23.9908	23.611	23.7723	23.6506	23.6502	25.5041	24.5432	24.231	25.3435	25.5883	25.8491	K	3	___1	1	3.37e-07	+	+	2.37134	0.0416552	1.4951	3.43919	0.000284844
Q16762;B1AH48	Q16762	Thiosulfate sulfurtransferase	TST	ALVSTKWLAESIRTGKLGPGLRVLDASWYSP	24	23.087	20.561	23.5629	22.7041	21.7764	24.2992	22.6417	24.9541	23.6899	24.9739	24.2094	24.1497	24.1219	23.7894	K	2	___1	1	0.00219901		+	2.20385	0.0545556	1.608	3.27627	0.000285894
Q02218;E9PCR7;A0A0D9SFS3;E9PDF2;Q02218-2;E9PFG7;Q02218-3	Q02218	2-oxoglutarate dehydrogenase. mitochondrial	OGDH	GKTKAEQFYCGDTEGKKVMSILLHGDAAFAG	401	23.925	19.8499	20.8906	19.506	20.2776	19.0954	21.2237	23.8096	21.6809	22.2054	22.1785	21.8282	22.681	22.3405	K	2	___1	1	4.9e-07		+	2.06579	0.0639111	1.70799	3.13278	0.000296246
O95139;O95139-2	O95139	NADH dehydrogenase [ubiquinone] 1 beta subcomplex subunit 6	NDUFB6	LENKSPWRKMVHGVYKKSIFVFTHVLVPVWI	66	24.9284	20.8114	22.9063	22.49	23.3624	23.9167	22.9274	25.9875	24.2293	25.209	23.9182	23.9067	24.57	24.6142	K	2	___1	1	0.00074374		+	2.21879	0.0536	1.58461	3.28579	0.000304841
P00505;P00505-2	P00505	Aspartate aminotransferase. mitochondrial	GOT2	FCFTGLKPEQVERLIKEFSIYMTKDGRISVA	396	20.8873	19.3163	18.898	19.2734	24.2221	24.4516	19.5397	23.469	21.3286	27.553	23.9495	22.297	24.7461	23.6334	K	2	___2	1	4.91e-19		+	1.20087	0.190259	2.9126	2.11279	0.000317939
O14561;H3BNK3	O14561	Acyl carrier protein. mitochondrial;Acyl carrier protein	NDUFAB1	EKLMCPQEIVDYIADKKDVYE__________	151	21.8665	18.7227	20.1841	20.3034	18.5619	19.7613	19.8266	24.0423	20.3977	25.8133	23.4357	22.4675	19.4776	19.5896	K	3	___1	1	4.57e-06		+	1.50944	0.120038	2.28531	2.49868	0.000355176
P08133;P08133-2;E5RK69;E7EMC6;E5RFF0;H0YC77	P08133	Annexin A6;Annexin	ANXA6	ADKLYKSMKGAGTDEKTLTRIMVSRSEIDLL	620	21.0261	20.1707	20.9564	22.5175	19.7222	21.5388	20.5655	20.4112	18.2187	19.6762	21.3339	17.8583	20.6204	20.0421	K	2	___1	1	0.000140424	+	+	2.86437	0.0286667	-1.19091	-3.81417	0.000387955
Q6NUK1-2;Q6NUK1	Q6NUK1-2	Calcium-binding mitochondrial carrier protein SCaMC-1	SLC25A24	TGQYSGIYDCAKKILKHEGLGAFYKGYVPNL	317	25.9932	20.2973	19.3985	19.9252	19.853	19.2265	18.1693	26.3935	19.8506	21.3978	21.8927	22.0107	22.7193	21.6066	K	3	___1	1	5.08e-12		+	1.82595	0.0813143	1.85831	2.85704	0.000404405
A0A0A0MR02;P45880-2;P45880;P45880-1;Q5JSD2;Q5JSD1;A2A3S1	A0A0A0MR02	Voltage-dependent anion-selective channel protein 2	VDAC2	SSNTDTGKVTGTLETKYKWCEYGLTFTEKWN	72	18.7665	20.6419	19.168	18.5653	20.3666	20.0354	19.0535	21.5812	22.2419	19.9192	20.8628	20.1225	21.4374	21.9662	K	2	___1	1	0.0016735		+	2.05556	0.067	1.64771	3.09859	0.000410229
P34897-3;P34897-2;P34897	P34897-3	Serine hydroxymethyltransferase. mitochondrial	SHMT2	DEGVNIGLEVKSKTAKLQDFKSFLLKDSETS	443	20.2754	18.3218	23.1035	19.2134	18.2568	22.8907	20.8006	23.2035	20.6192	23.9365	23.4098	19.4343	22.7048	22.3795	K	2	___1	1	0.00400932		+	1.8114	0.0815676	1.8322	2.83146	0.0004799
D6RAL1;Q969S9-5;Q969S9-4;Q969S9-2;Q969S9-3;Q969S9	D6RAL1	Ribosome-releasing factor 2. mitochondrial	GFM2	KPLLLQLPIGEAKTFKGVVDVVMKEKLLWNC	191	19.8481	21.0072	19.8611	18.8741	18.5503	20.9007	21.0587	20.0767	22.3018	19.6612	21.2031	22.4993	22.9943	24.9959	K	2	___1	1	0.00197992		+	1.69919	0.0961429	1.94744	2.70628	0.000490831
P00505;P00505-2	P00505	Aspartate aminotransferase. mitochondrial	GOT2	CAHNPTGVDPRPEQWKEIATVVKKRNLFAFF	227	20.2255	20.1274	19.0967	19.2387	20.2546	19.2974	19.4696	22.3136	20.1585	20.0146	20.8255	21.2289	21.4145	22.8771	K	2	___1	1	3.74e-14		+	2.08137	0.066087	1.58897	3.11032	0.000492911
P11217;P11217-2	P11217	Glycogen phosphorylase. muscle form	PYGM	TVMIGGKAAPGYHMAKMIIRLVTAIGDVVNH	618	20.8669	18.4146	21.2073	18.9443	20.2721	19.6469	18.8177	22.7561	19.8878	23.1747	22.1557	19.8028	21.4429	20.0821	K	3	___1	1	0.000905657		+	2.05955	0.06904	1.59033	3.08283	0.00053044
P48047;H7C0C1;H7C086	P48047	ATP synthase subunit O. mitochondrial	ATP5O	GRYATALYSAASKQNKLEQVEKELLRVAQIL	54	21.9322	18.6721	17.407	19.0867	21.1925	19.789	20.2999	21.438	20.4798	24.6928	23.0422	21.2441	22.7643	22.0027	K	2	___2	1	6.43e-20		+	1.32615	0.15127	2.46921	2.26154	0.000531446
Q00325-2;Q00325;F8VVM2	Q00325-2	Phosphate carrier protein. mitochondrial	SLC25A3	TLRDAAPKMYKEEGLKAFYKGVAPLWMRQIP	213	24.6335	19.9137	19.1031	20.344	21.8396	22.8953	20.3484	24.723	24.0764	23.3644	22.2113	22.1502	23.4307	23.2704	K	2	___1	1	0.00347726		+	1.6092	0.115422	2.02126	2.59815	0.000558986
A2A274;Q99798	A2A274	Aconitate hydratase. mitochondrial	ACO2	TFADPADYNKIHPVDKLTIQGLKDFTPGKPL	748	27.1419	24.4416	24.5893	25.2053	26.718	26.1012	19.5321	29.1212	26.3192	27.0653	26.7325	27.1093	26.6745	26.8024	K	3	___1	1	2.43e-11		+	1.40503	0.142016	2.29929	2.35556	0.000588081
P06732	P06732	Creatine kinase M-type;Creatine kinase M-type. N-terminally processed	CKM	EKEQQQLIDDHFLFDKPVSPLLLASGMARDW	196	22.5772	20.0108	18.8997	19.2268	20.7173	19.4594	19.0773	23.4218	19.8153	24.2147	26.4046	23.6752	20.7978	19.3363	K	3	___1	1	1.32e-67		+	1.27665	0.167013	2.52817	2.19662	0.00059212
Q9P2R7-2;Q9P2R7;A0A0U1RQL1	Q9P2R7-2	Succinyl-CoA ligase [ADP-forming] subunit beta. mitochondrial	SUCLA2	ILACDDLDEAARMVVKLSEIVTLAKQAHVDV	420	19.689	19.5161	19.2474	19.6985	21.9315	18.8564	18.4542	21.9469	20.9365	24.6474	23.6435	22.2833	20.4359	18.2575	K	2	___1	1	5.56e-16		+	1.52097	0.120037	2.10827	2.49164	0.000621421
P16401	P16401	Histone H1.5	HIST1H1B	AKRKATGPPVSELITKAVAASKERNGLSLAA	49	17.9985	19.0524	19.0484	19.878	19.779	19.1631	19.7263	20.774	20.1622	19.2269	19.9723	23.4331	21.9201	21.431	K	2	___1	1	1.34e-34		+	1.82714	0.0826849	1.75341	2.83256	0.000625558
P30405;H0Y548;R4GN99;P30405-2	P30405	Peptidyl-prolyl cis-trans isomerase F. mitochondrial;Peptidyl-prolyl cis-trans isomerase	PPIF	VPKTAENFRALCTGEKGFGYKGSTFHRVIPS	86	26.5965	19.1963	23.6531	23.5	24.5407	25.5454	22.5743	27.0255	24.6224	26.2275	25.3726	24.7348	26.1481	25.849	K	2	___1	1	1.54e-06		+	1.55115	0.122939	2.05337	2.52466	0.000653012
A2A274;Q99798	A2A274	Aconitate hydratase. mitochondrial	ACO2	YNKIHPVDKLTIQGLKDFTPGKPLKCIIKHP	755	22.5614	23.5996	23.3445	24.3791	23.9179	24.754	19.0533	24.5066	24.0821	26.2369	25.0266	25.1197	26.3284	26.2659	K	3	___1	1	1.67e-35		+	1.38868	0.140985	2.27949	2.33086	0.000683169
P24752;H0YEL7	P24752	Acetyl-CoA acetyltransferase. mitochondrial	ACAT1	GSTPYGGVKLEDLIVKDGLTDVYNKIHMGSC	181	22.0351	19.0614	17.8647	19.7693	23.9854	21.2151	20.5225	23.3204	22.8489	22.4173	23.1134	23.3965	21.8201	21.7903	K	2	___1	1	1.66e-41		+	1.54386	0.12344	2.0362	2.51219	0.000718455
A0A087WXC5;E7ESZ7;O95299;O95299-2	A0A087WXC5	NADH dehydrogenase [ubiquinone] 1 alpha subcomplex subunit 10. mitochondrial	NDUFA10	MKITSAYLQDIENAYKKTFLPEMSEKCEVLQ	242	20.3629	20.0733	18.5795	19.6324	20.2793	21.6577	19.4892	21.0754	19.397	23.4211	21.6721	22.4146	22.9686	23.248	K	2	___1	1	1.9e-24		+	1.55711	0.124958	2.0175	2.5272	0.000721974
P08559;P08559-2;P08559-4;P08559-3;Q5JPT9;Q5JPU0;Q5JPU1;Q5JPU2;P29803	P08559	Pyruvate dehydrogenase E1 component subunit alpha. somatic form. mitochondrial;Pyruvate dehydrogenase E1 component subunit alpha. testis-specific form. mitochondrial	PDHA1;PDHA2	LKYYRMMQTVRRMELKADQLYKQKIIRGFCH	77	19.9338	21.5227	20.1555	22.0233	20.9283	19.2627	19.8092	21.2475	23.6588	20.0184	22.4606	22.6514	21.8757	23.5252	K	2	___1	1	6.62e-05		+	1.84959	0.081	1.68601	2.84346	0.000761309
P24752;H0YEL7	P24752	Acetyl-CoA acetyltransferase. mitochondrial	ACAT1	LEDLIVKDGLTDVYNKIHMGSCAENTAKKLN	190	24.4047	18.9997	20.4216	19.1413	19.8803	19.7399	20.7339	25.0259	19.4475	25.8966	23.4056	19.1961	23.2661	22.6884	K	3	___1	1	5.03e-27		+	1.39561	0.141654	2.22926	2.33504	0.000774166
P00387-2;P00387;P00387-3;B1AHF3	P00387-2	NADH-cytochrome b5 reductase 3;NADH-cytochrome b5 reductase 3 membrane-bound form;NADH-cytochrome b5 reductase 3 soluble form	CYB5R3	FQRSTPAITLESPDIKYPLRLIDREIISHDT	19	18.5864	18.5322	18.8832	18.3334	20.3404	22.7975	19.7861	20.1208	19.66	24.4668	24.1521	19.4738	23.2539	22.7266	K	2	___1	1	4.86e-63		+	1.31025	0.160106	2.37069	2.23082	0.000783096
P30048-2;P30048	P30048-2	Thioredoxin-dependent peroxide reductase. mitochondrial	PRDX3	AVVNGEFKDLSLDDFKGKYLVLFFYPLDFTF	73	27.8437	26.158	26.4278	26.5628	27.6446	27.2149	26.2974	28.913	28.5268	29.2662	27.4394	27.7311	28.1129	28.1283	K	2	___1	1	0.00100988		+	2.10659	0.0673077	1.42407	3.07238	0.00100016
H0YK48;P09493-5;P09493;H0YL52;P09493-6;H0YNC7;P09493-9;Q6ZN40	H0YK48;P09493;P09493-6;P09493-9;Q6ZN40	Tropomyosin alpha-1 chain	TPM1	AELSEGKCAELEEELKTVTNNLKSLEAQAEK	198	20.0437	19.3149	20.2193	20.0483	19.4036	18.703	20.568	22.5016	20.5163	18.9208	23.5141	23.3253	22.9403	21.0692	K	2	___1	1	9.67e-53		+	1.44533	0.135016	2.06954	2.38365	0.00102051
E9PMG2	E9PMG2		PPT1	VIWHGMGERQLLQSLKHGCY___________	51	18.4601	21.0996	19.2834	19.1212	21.541	19.491	19.0272	19.4699	21.8758	20.4208	20.9352	22.0619	22.0908	19.8567	K	2	___1	1	0.00836549		+	2.40387	0.0529697	1.24109	3.32244	0.00103893
P06576;H0YH81;F8W079	P06576	ATP synthase subunit beta. mitochondrial;ATP synthase subunit beta	ATP5B	RTIAMDGTEGLVRGQKVLDSGAPIKIPVGPE	124	19.9006	20.634	25.7946	20.4786	17.8038	23.6545	25.2799	23.4967	20.503	28.1711	25.0107	19.3996	25.2501	25.127	K	3	___2	1	3.51e-98		+	1.55349	0.121165	1.91603	2.50572	0.00105553
P25705;P25705-2;P25705-3;K7EK77;K7ERX7;K7EJP1;K7EQH4	P25705	ATP synthase subunit alpha. mitochondrial	ATP5A1	NLEPDNVGVVVFGNDKLIKEGDIVKRTGAIV	123	20.5223	20.1547	21.3433	20.9232	23.3094	20.4293	19.8304	24.2636	20.0449	25.5183	25.6632	20.2804	24.1227	24.0561	K	3	___1	1	9.25e-50		+	1.18848	0.200906	2.49094	2.0697	0.0010954
P35609;P35609-2;F6THM6	P35609	Alpha-actinin-2	ACTN2	ELRRELPPDQAQYCIKRMPAYSGPGSVPGAL	864	22.0984	21.0995	21.7086	21.2488	19.4534	21.0423	18.2883	22.1284	22.7153	22.1426	23.1285	21.137	23.1085	23.6248	K	2	___1	1	3.11e-05		+	1.55128	0.120491	1.86369	2.49364	0.00128497
Q00872-10;Q00872-3;Q00872;Q00872-6;F8VZY0;Q00872-9;Q00872-8;F8VZE0;Q00872-5;Q00872-7;G3V1V7;Q00872-4;Q00872-2	Q00872-10;Q00872-4	Myosin-binding protein C. slow-type	MYBPC1	EVKWYKNGQEIRPSTKYIFEHKGCQRILFIN	322	23.5128	18.9593	18.7335	19.4322	19.6635	20.2699	20.1952	23.6704	20.1276	23.2052	22.8868	19.3034	21.9938	22.7178	K	3	___1	1	0.00399077		+	1.53899	0.120367	1.87694	2.47972	0.00129244
F2Z337;P02144;B0QYF8;F2Z2F1	F2Z337;P02144	Myoglobin	MB	ADIPGHGQEVLIRLFKGHPETLEKFDKFKHL	35	25.0257	19.1616	19.849	22.3461	22.433	21.5221	19.7136	24.7451	22.8504	22.9817	23.7287	23.5009	21.66	23.5491	K	3	___1	1	4.15e-13		+	1.55669	0.121192	1.85211	2.49869	0.00130866
O75947	O75947	ATP synthase subunit d. mitochondrial	ATP5H	KAGLVDDFEKKFNALKVPVPEDKYTAQVDAE	78	30.2826	29.9982	30.5234	30.0419	31.9792	31.1069	30.6425	30.9925	31.0094	32.7768	31.5706	32.3501	32.0082	31.7424	K	2	___1	1	3.92e-35	+	+	2.554	0.0455484	1.12504	3.39909	0.00133856
P30038;P30038-2;P30038-3	P30038	Delta-1-pyrroline-5-carboxylate dehydrogenase. mitochondrial	ALDH4A1	PFNHGHKVAKFCYADKSLLNKAIEAALAARK	99	23.5316	22.5805	18.494	22.1304	24.0313	23.6696	22.8873	24.4146	21.5087	24.2814	24.3949	25.6154	25.4459	26.1085	K	2	___1	1	1.34e-06		+	1.38149	0.146411	2.06353	2.29645	0.00141012
A0A0A0MTS7;Q8WZ42-12;Q8WZ42-13;Q8WZ42-11;Q8WZ42-4;Q8WZ42-7;Q8WZ42-2;Q8WZ42;Q8WZ42-8;Q8WZ42-5;A0A0A0MRA3;Q8WZ42-3;Q8WZ42-10;Q8WZ42-9;Q8WZ42-6	A0A0A0MTS7	Titin	TTN	AYSRDSGIITCRATNKYGTDHTSATLIVKDE	1782	24.4344	18.9025	18.8555	22.102	20.4173	19.628	21.6888	22.0997	23.6545	21.4498	23.5176	22.9307	23.5635	23.7716	K	3	___1	1	1.41e-09		+	1.32622	0.158405	2.13699	2.22989	0.00146516
Q9Y4W6	Q9Y4W6	AFG3-like protein 2	AFG3L2	RLIDDEVRILINDAYKRTVALLTEKKADVEK	710	18.2807	21.1254	22.7685	20.889	19.1506	22.2242	21.8228	23.2006	20.9118	23.4375	23.287	23.374	22.787	23.0877	K	2	___1	1	0.00159889		+	1.43411	0.140889	1.97491	2.35553	0.00147148
P48735;P48735-2	P48735	Isocitrate dehydrogenase [NADP]. mitochondrial	IDH2	FIKEKLILPHVDIQLKYFDLGLPNRDQTDDQ	80	18.8272	19.2738	19.154	18.7261	20.4069	20.5217	19.5115	23.4242	21.1035	22.2062	25.6951	21.8236	19.5792	19.1503	K	3	___1	1	9.32e-15		+	1.18745	0.202557	2.36584	2.05922	0.00155121
P30084	P30084	Enoyl-CoA hydratase. mitochondrial	ECHS1	IKEMQNLSFQDCYSSKFLKHWDHLTQVKKPV	115	21.2992	19.7076	18.6601	20.2404	20.2265	20.5169	19.5599	23.8235	19.3451	26.2983	24.1876	17.4426	24.1114	23.2992	K	3	___1	1	1.51e-136		+	1.07368	0.235945	2.61387	1.91435	0.00156147
P30038;P30038-2;P30038-3	P30038	Delta-1-pyrroline-5-carboxylate dehydrogenase. mitochondrial	ALDH4A1	GAVFSQDKDVVQEATKVLRNAAGNFYINDKS	495	20.0606	20.2629	19.0832	19.185	19.2044	20.5752	19.9385	21.7095	22.6374	18.7241	18.8996	23.2124	22.873	22.6477	K	2	___1	1	0.000147295		+	1.58186	0.123677	1.77056	2.51606	0.00158209
P06576;H0YH81;F8W079	P06576	ATP synthase subunit beta. mitochondrial;ATP synthase subunit beta	ATP5B	RTIAMDGTEGLVRGQKVLDSGAPIKIPVGPE	124	19.8737	21.4568	19.7379	16.8442	20.4797	21.3614	22.0781	21.8605	24.2685	21.687	20.3497	21.8518	20.2518	23.3934	K	3	___1	1	3.51e-98		+	1.65477	0.115604	1.69013	2.59298	0.00159673
Q53GG5;A0A0A0MQY0;Q53GG5-2;Q53GG5-3	Q53GG5	PDZ and LIM domain protein 3	PDLIM3	DAQDRIKAAAHQLCLKIDRGETHLWSPQVSE	79	25.8765	21.4857	21.3596	21.7062	19.996	20.9183	19.8524	25.1096	21.6204	24.8361	24.6173	20.7572	23.9932	23.2436	K	3	___1	1	4.27e-10		+	1.49792	0.127356	1.85467	2.42161	0.0016667
P48047;H7C0C1;H7C086	P48047	ATP synthase subunit O. mitochondrial	ATP5O	LYSAASKQNKLEQVEKELLRVAQILKEPKVA	60	21.9322	20.1928	19.0386	20.4177	19.9455	20.9175	19.6561	21.438	20.58	24.6928	23.0422	21.2441	22.7643	22.0027	K	2	___2	1	6.43e-20		+	1.40665	0.144145	1.95196	2.31555	0.00179591
P52758;H0YBX3;H0YB34	P52758	Ribonuclease UK114	HRSP12	INDFNTVNEIYKQYFKSNFPARAAYQVAALP	101	19.4071	18.427	19.2176	20.3134	19.6079	19.4528	20.2466	22.6032	21.4548	22.5445	20.1669	19.016	21.9354	21.3395	K	2	___1	1	0.00370245		+	1.53172	0.12475	1.7697	2.45056	0.00194675
O00330-3;O00330	O00330-3	Pyruvate dehydrogenase protein X component. mitochondrial	PDHX	PHAYATADCDLGAVLKVRQDLVKDDIKVSVN	299	24.7068	20.6872	18.5464	17.6744	19.3254	20.1035	19.3331	25.8366	19.6022	25.68	23.1347	18.1819	22.8416	22.2541	K	3	___1	1	1.12e-22		+	1.08066	0.23653	2.45061	1.91493	0.00224764
P06732	P06732	Creatine kinase M-type;Creatine kinase M-type. N-terminally processed	CKM	DPIISDRHGGYKPTDKHKTDLNHENLKGGDD	105	30.0038	25.5462	25.382	25.7584	26.2344	25.4531	24.1895	29.7758	20.1674	21.9769	24.2659	23.4586	23.6936	25.27	K	3	___1	1	1.33e-33		+	1.32645	0.160688	-1.99417	-2.21366	0.00226379
A0A0C4DFU2;P04179-4;P04179;F5H3C5;F5H4R2;A0A0C4DFU1;F5GYZ5;P04179-2;G8JLJ2	A0A0C4DFU2	Superoxide dismutase;Superoxide dismutase [Mn]. mitochondrial	SOD2	PNGGGEPKGELLEAIKRDFGSFDKFKEKLTA	122	32.0039	30.0532	30.3169	30.124	28.6505	31.0894	30.1287	33.1583	30.4033	32.4676	30.9338	31.0639	31.4536	31.4921	K	2	___1	1	0.000401849		+	2.14649	0.0694035	1.22943	3.01681	0.00229635
Q9NSE4	Q9NSE4	Isoleucine--tRNA ligase. mitochondrial	IARS2	ITDIKTAAKELLKKVKFIPGSALNGMVEMMD	500	20.6208	18.9234	19.6107	20.2969	20.4899	20.2863	19.0683	21.6333	18.7432	25.1818	23.9939	18.5623	23.9356	22.9468	K	2	___1	1	5.49e-07		+	1.17011	0.215209	2.24294	2.02544	0.00237416
A0A0C4DFU2;P04179-4;P04179;F5H3C5;F5H4R2;A0A0C4DFU1;F5GYZ5;P04179-2;G8JLJ2	A0A0C4DFU2	Superoxide dismutase;Superoxide dismutase [Mn]. mitochondrial	SOD2	GELLEAIKRDFGSFDKFKEKLTAASVGVQGS	130	32.5452	29.1387	31.4859	30.75	33.4753	32.4589	31.624	33.0575	30.1848	34.3316	33.0408	33.8804	33.194	32.9337	K	2	___1	1	2.09e-22		+	2.00724	0.0760606	1.3064	2.89643	0.00238636
Q9NXG0;Q9NXG0-2	Q9NXG0	Centlein	CNTLN	LQKLRKAERKIENLEKALQLKSQENDELRDA	543	23.1203	20.565	19.5194	19.5959	19.4719	24.36	19.8273	23.9902	21.6414	25.7658	23.8079	18.0074	24.4554	25.2808	K	2	___1	1	0.00354933		+	1.10788	0.2325	2.35559	1.94713	0.00245634
P28331;P28331-2;P28331-4;B4DJ81;P28331-3;P28331-5	P28331	NADH-ubiquinone oxidoreductase 75 kDa subunit. mitochondrial	NDUFS1	LQDIASGSHPFSQVLKEAKKPMVVLGSSALQ	467	28.1738	19.5172	25.5796	25.552	27.8909	27.708	24.8022	28.9319	25.1462	28.898	28.1748	26.972	27.7634	27.5289	K	3	___1	1	4.44e-228		+	1.28066	0.176854	2.02736	2.15588	0.00253306
P40939	P40939	Trifunctional enzyme subunit alpha. mitochondrial;Long-chain enoyl-CoA hydratase;Long chain 3-hydroxyacyl-CoA dehydrogenase	HADHA	RPEKVIGMHYFSPVDKMQLLEIITTEKTSKD	505	20.2168	20.4827	19.4725	19.0775	19.2528	20.2262	20.9996	22.6651	20.6373	23.2664	26.8093	24.7826	18.9653	20.3043	K	3	___1	1	2.56e-68		+	1.02598	0.257238	2.52889	1.84168	0.00254343
A0A0A0MSE2;A0A0D9SFP2;E9PF18;Q16836;Q16836-3;Q16836-2;A0A1W2PNM1;A0A1W2PQV5;A0A1W2PQC2;A0A1W2PRT2;A0A1W2PQ78	A0A0A0MSE2	Hydroxyacyl-coenzyme A dehydrogenase. mitochondrial	HADH	PMTSQKTFESLVDFSKALGKHPVSCKDTPGF	202	24.4205	25.1506	24.96	24.7432	26.3383	25.234	24.3136	25.6243	25.3515	26.8975	26.5158	26.4712	26.4308	25.9631	K	3	___1	1	1.31e-57		+	2.24075	0.0686275	1.15629	3.07594	0.00256477
P40926;P40926-2;G3XAL0	P40926	Malate dehydrogenase. mitochondrial;Malate dehydrogenase	MDH2	TALTGRIQEAGTEVVKAKAGAGSATLSMAYA	239	26.2658	23.4439	23.2306	26.1769	24.1178	26.7033	25.5251	26.6051	25.0512	26.5094	27.3068	25.4744	26.7758	27.4117	K	2	___1	1	4.86e-12		+	1.86078	0.0884938	1.38157	2.75505	0.00268659
Q8N0X4-2;Q8N0X4	Q8N0X4-2	Citrate lyase subunit beta-like protein. mitochondrial	CLYBL	YIPRRAVLYVPGNDEKKIKKIPSLNVDCAVL	57	19.827	19.4785	25.1676	26.0961	24.8069	27.0324	23.8515	28.0035	24.9974	26.4982	27.6982	24.2733	26.6759	25.2974	K	2	___1	1	4.78e-10		+	1.04682	0.247828	2.45484	1.86725	0.00269288
P43155-2;P43155;P43155-3	P43155-2	Carnitine O-acetyltransferase	CRAT	CRVPGPKQDTVSNFSKTKKPPTHITVVHNYQ	174	19.6579	20.601	20.1813	17.3432	19.5486	18.9806	20.0715	21.9258	20.3927	19.6258	22.0439	22.4588	21.5012	21.1933	K	2	___1	1	1.82e-07		+	1.3987	0.145848	1.82249	2.28576	0.00282416
O75323;H7C333	O75323	Protein NipSnap homolog 2	GBAS	WRYEGGYPALTEVMNKLRENKEFLEFRKARS	143	21.0451	18.6544	23.3927	22.5321	23.3225	23.8533	18.5467	23.5989	18.5943	26.6153	25.1353	22.4969	24.6796	23.9682	K	2	___1	1	8.26e-10		+	1.28955	0.175632	1.9631	2.16033	0.00294089
O14561;I3L505	O14561	Acyl carrier protein. mitochondrial;Acyl carrier protein	NDUFAB1	RVLYVLKLYDKIDPEKLSVNSHFMKDLGLDS	97	28.9138	26.0478	26.5409	26.9276	28.9949	28.1593	27.1193	30.2822	26.759	29.4709	28.4438	29.1756	28.5899	29.104	K	3	___1	1	4.74e-06		+	1.93939	0.08336	1.30311	2.81487	0.00296998
P38646	P38646	Stress-70 protein. mitochondrial	HSPA9	KMEEFKDQLPADECNKLKEEISKMRELLARK	610	23.0127	19.934	21.7225	20.9571	18.4009	22.2244	17.8175	23.194	18.1724	23.3316	23.9713	23.8133	23.5339	23.8325	K	2	___1	1	0.00039739		+	1.12078	0.231118	2.25427	1.95787	0.00297481
A0A0A0MSE2;A0A0D9SFP2;E9PF18;Q16836;Q16836-3;Q16836-2;A0A1W2PNM1;A0A1W2PQV5;A0A1W2PQC2;A0A1W2PRT2	A0A0A0MSE2	Hydroxyacyl-coenzyme A dehydrogenase. mitochondrial	HADH	VENLKVKNELFKRLDKFAAEHTIFASNTSSL	136	19.8523	19.7758	17.9791	19.9855	18.7268	20.8288	19.5001	20.9662	19.353	20.0611	25.1562	23.469	22.9652	18.8671	K	3	___1	1	1.46e-169		+	1.24521	0.18986	2.02706	2.10794	0.00299142
P00505;P00505-2	P00505	Aspartate aminotransferase. mitochondrial	GOT2	EQVERLIKEFSIYMTKDGRISVAGVTSSNVG	404	20.8873	20.6517	19.9667	19.6929	24.2221	24.4516	19.6705	23.469	20.7967	27.553	23.9495	22.297	24.7461	23.6334	K	2	___2	1	4.91e-19		+	1.0359	0.254492	2.41456	1.84942	0.00315321
P40939	P40939	Trifunctional enzyme subunit alpha. mitochondrial;Long-chain enoyl-CoA hydratase;Long chain 3-hydroxyacyl-CoA dehydrogenase	HADHA	DRGQQQVFKGLNDKVKKKALTSFERDSIFSN	413	24.9362	20.7699	24.6947	23.5306	20.7453	26.019	20.1303	26.9533	19.8867	26.4252	25.3696	24.6862	25.9147	24.3448	K	2	___2	1	0.00341281		+	1.36701	0.156027	1.82207	2.24404	0.0032301
P08574	P08574	Cytochrome c1. heme protein. mitochondrial	CYC1	QDGPNEDGEMFMRPGKLFDYFPKPYPNSEAA	170	20.1591	19.0714	20.4351	19.4988	22.5996	20.0881	19.9593	22.6893	18.6315	22.6713	22.4219	22.3592	21.3426	22.6754	K	2	___1	1	0.00150658		+	1.58784	0.119673	1.56854	2.47837	0.00323147
P12882;Q9UKX2	P12882;Q9UKX2	Myosin-1;Myosin-2	MYH1;MYH2	EEGKILRIQLELNQVKSEVDRKIAEKDEEID	1575	21.0373	22.5254	23.8353	23.2792	20.1688	18.2237	18.7573	23.0701	24.199	23.6876	24.4509	21.206	19.189	23.638	K	3	___1	1	7.17e-37		+	1.49863	0.135306	1.65909	2.38582	0.00326316
O00330-3;O00330;H0YD97;O00330-2	O00330-3	Pyruvate dehydrogenase protein X component. mitochondrial	PDHX	RVVDDELATRFLKSFKANLENPIRLA_____	476	26.1063	23.9868	25.0498	24.206	25.9094	25.4124	25.4658	26.6139	25.7595	25.9703	25.0367	26.2768	26.2114	26.8196	K	2	___1	1	1.97e-79		+	2.65568	0.0521176	0.935957	3.30346	0.00326885
O75947	O75947	ATP synthase subunit d. mitochondrial	ATP5H	KAGLVDDFEKKFNALKVPVPEDKYTAQVDAE	78	22.9506	26.3434	19.3372	19.3106	26.5065	27.0687	27.2414	26.4306	24.1129	28.144	27.7961	27.8711	28.3793	25.9922	K	2	___2	1	3.92e-35		+	0.86884	0.337573	2.85254	1.62677	0.00332351
P40939;H0YFD6	P40939	Trifunctional enzyme subunit alpha. mitochondrial;Long-chain enoyl-CoA hydratase;Long chain 3-hydroxyacyl-CoA dehydrogenase	HADHA	KTSKDTSASAVAVGLKQGKVIIVVKDGPGFY	531	20.3229	21.4068	22.2411	20.0033	24.0212	22.6777	23.269	23.145	22.8242	23.798	22.6624	22.9603	24.6528	24.3489	K	3	___2	1	3.26e-93		+	1.64756	0.125979	1.4928	2.53253	0.00347151
P07195	P07195	L-lactate dehydrogenase B chain	LDHB	PCILNARGLTSVINQKLKDDEVAQLKKSADT	308	23.4529	23.545	22.697	24.5287	25.7754	25.0147	23.4636	25.458	19.864	20.0842	24.4399	24.3256	19.6284	20.081	K	2	___1	1	2.92e-09		+	1.17578	0.217128	-2.08517	-2.01944	0.00353422
Q02218;E9PCR7;A0A0D9SFS3;E9PDF2;Q02218-2;E9PFG7	Q02218	2-oxoglutarate dehydrogenase. mitochondrial	OGDH	WCQEEHKNQGYYDYVKPRLRTTISRAKPVWY	970	19.1962	22.058	21.5288	21.675	21.3698	20.8902	20.8371	24.3438	23.0613	22.3953	22.7146	22.7884	23.4736	20.7581	K	2	___1	1	0.000552737		+	1.41954	0.144699	1.71143	2.29423	0.00372019
O14958;O14958-2	O14958	Calsequestrin-2	CASQ2	QVLEHKAIGFVMVDAKKEAKLAKKLGFDEEG	97	19.8048	18.9781	18.8342	18.4581	22.8785	23.343	22.5958	21.0718	18.3365	23.8342	22.5401	23.7701	24.3039	23.8761	K	2	___1	1	0.00356081		+	1.30466	0.174716	1.83431	2.16372	0.00404422
H0YDD4;P10515;E9PEJ4	H0YDD4	Acetyltransferase component of pyruvate dehydrogenase complex;Dihydrolipoyllysine-residue acetyltransferase component of pyruvate dehydrogenase complex. mitochondrial	DLAT	DVNMGEVLLVRKELNKILEGRSKISVNDFII	298	22.2465	19.0452	19.4851	20.4234	20.4653	22.2925	18.818	23.8354	23.3156	22.914	20.123	22.4519	20.7702	23.0867	K	2	___2	1	5.41e-09		+	1.22083	0.200857	1.96011	2.0677	0.00404611
P40939;H0YFD6	P40939	Trifunctional enzyme subunit alpha. mitochondrial;Long-chain enoyl-CoA hydratase;Long chain 3-hydroxyacyl-CoA dehydrogenase	HADHA	DKMQLLEIITTEKTSKDTSASAVAVGLKQGK	519	20.3229	21.4068	22.2411	20.3181	24.0212	22.6777	23.269	23.145	22.8242	23.798	22.6624	22.9603	24.6528	24.3489	K	3	___2	1	3.26e-93		+	1.65227	0.123835	1.44783	2.52502	0.00405313
P49411	P49411	Elongation factor Tu. mitochondrial	TUFM	DLKFNLILRQPMILEKGQRFTLRDGNRTIGT	418	19.4419	19.6472	23.2398	21.6197	23.9592	24.8067	22.8463	24.7259	22.8361	25.0266	24.6557	23.3569	24.286	23.9639	K	2	___1	1	0.00288302		+	1.25048	0.190377	1.89861	2.10024	0.00422492
A0A087X1N7;P20929-3;P20929-2;P20929-4;P20929	A0A087X1N7	Nebulin	NEB	PKFKLDTVLQNFSSDKKYKDSYLKDILGHYV	420	20.3455	21.7375	20.7432	21.3797	21.6433	21.5778	21.5483	21.168	19.4026	18.4948	18.1145	19.4966	18.9051	21.986	K	2	___1	1	6.79e-07		+	1.45415	0.143147	-1.62967	-2.323	0.00426794
P13804;P13804-2;H0YLU7;H0YL12;H0YKF0	P13804	Electron transfer flavoprotein subunit alpha. mitochondrial	ETFA	CDKVAQDLCKVAGIAKVLVAQHDVYKGLLPE	75	20.7832	19.888	18.7316	18.8028	20.4516	19.7204	19.9321	22.8355	20.1652	21.2739	21.2533	23.5608	20.8939	19.0482	K	3	___1	1	4.51e-29		+	1.5327	0.1305	1.53159	2.40014	0.00449297
P40939	P40939	Trifunctional enzyme subunit alpha. mitochondrial;Long-chain enoyl-CoA hydratase;Long chain 3-hydroxyacyl-CoA dehydrogenase	HADHA	GIEQGSDAGYLCESQKFGELVMTKESKALMG	326	30.3289	28.1305	27.8703	27.9688	30.7218	29.5337	29.1868	30.9432	28.7702	32.7773	31.3372	30.0545	31.2581	30.9459	K	3	___1	1	0		+	1.33057	0.168325	1.76366	2.18739	0.00450116
P31040-2;P31040;A0A087X1I3;P31040-3	P31040-2	Succinate dehydrogenase [ubiquinone] flavoprotein subunit. mitochondrial	SDHA	AAVFRVGSVLQEGCGKISKLYGDLKHLKTFD	490	20.3101	17.719	20.3136	19.6205	20.9877	19.7125	19.0633	21.9775	23.2356	21.0111	21.6116	18.7722	21.8488	23.9217	K	2	___1	1	3.58e-21		+	1.12005	0.230768	2.09311	1.94386	0.00452498
Q00872-10;Q00872-3;Q00872;Q00872-6;F8VZY0;Q00872-9;Q00872-8;F8VZE0;Q00872-5;Q00872-7;G3V1V7;Q00872-4;Q00872-2	Q00872-10;Q00872-4	Myosin-binding protein C. slow-type	MYBPC1	PLTDQTVNLGKEICLKCEISENIPGKWTKNG	478	23.8435	20.1466	19.8993	19.8703	21.3192	19.7306	18.3525	22.722	20.3195	24.8581	24.4665	19.5285	22.96	24.9264	K	2	___1	1	1.58e-62		+	0.984427	0.276355	2.37414	1.77405	0.00460077
P20962;F5H7R9;F5GXR3	P20962	Parathymosin	PTMS	_MSEKSVEAAAELSAKDLKEKKEKVEEKASR	15	22.8317	21.5299	21.1042	23.7526	23.7641	22.6511	22.4214	23.583	22.298	23.6859	24.0081	24.416	23.789	24.4324	K	2	___1	1	5.02e-37		+	2.00162	0.0822632	1.16534	2.81443	0.00464976
P40939	P40939	Trifunctional enzyme subunit alpha. mitochondrial;Long-chain enoyl-CoA hydratase;Long chain 3-hydroxyacyl-CoA dehydrogenase	HADHA	MGLVDQLVEPLGPGLKPPEERTIEYLEEVAI	230	20.0932	19.7405	19.1571	19.9874	19.6661	19.7643	18.1615	21.5301	19.3324	24.3765	22.2425	17.9904	23.2062	21.921	K	3	___2	1	2.26e-20		+	1.14721	0.230061	2.00414	1.97281	0.00502132
P12883	P12883	Myosin-7	MYH7	LTAKKRKLEDECSELKRDIDDLELTLAKVEK	951	26.28	23.5648	22.5018	23.5154	22.4695	24.0984	22.4727	26.1312	24.4586	24.3215	24.6609	24.4133	24.4887	24.9728	K	2	___1	1	1.9e-24		+	1.87618	0.0954353	1.22063	2.70209	0.00512715
Q13423;E9PCX7	Q13423	NAD(P) transhydrogenase. mitochondrial	NNT	YSNNITKLLKAISPDKDNFYFDVKDDFDFGT	403	25.9747	22.4794	23.6515	24.0369	24.1356	20.256	20.3316	25.6219	24.8916	26.7011	23.6624	23.798	24.5867	25.1462	K	2	___1	1	2.56e-07		+	1.18019	0.218325	1.9346	2.01026	0.00520954
Q08257-3;Q08257;A6NP24;C9JH92	Q08257-3	Quinone oxidoreductase	CRYZ	MRAVRVFEFGGPEVLKLRSDIAVPIPKDHQV	23	24.4136	24.1629	25.5442	24.2657	20.7517	25.2537	24.1119	25.6617	22.9816	28.4013	26.7661	24.3954	26.047	25.4108	K	2	___1	1	3.17e-11		+	1.4216	0.148658	1.59431	2.27447	0.00541406
P13073;H3BN72;H3BNV9;Q86WV2;H3BPG0	P13073	Cytochrome c oxidase subunit 4 isoform 1. mitochondrial	COX4I1	PLPEVAHVKHLSASQKALKEKEKASWSSLSM	60	29.1234	27.2385	27.794	27.8416	28.4957	28.0351	27.6593	30.05	27.943	29.5666	28.747	28.3409	29.3967	29.2681	K	3	___1	1	7.58e-17		+	2.21907	0.0779672	1.01781	2.94594	0.00551316
P40926;P40926-2;G3XAL0	P40926	Malate dehydrogenase. mitochondrial;Malate dehydrogenase	MDH2	LLLGKKGIEKNLGIGKVSSFEEKMISDAIPE	307	24.9658	25.3152	20.7237	25.8126	26.6714	26.3337	23.9206	25.4364	27.4099	26.2745	25.8423	27.3996	26.5761	27.6237	K	3	___1	1	2.04e-264		+	1.22387	0.201859	1.83136	2.05651	0.00573661
Q03252	Q03252	Lamin-B2	LMNB2	AKAEDGHAVAKKQLEKETLMRVDLENRCQSL	200	20.71	19.5668	19.0682	22.2327	19.7222	20.17	20.1489	21.4956	21.3572	20.9589	21.9498	20.679	21.3641	21.2804	K	2	___1	1	0.0013016		+	2.09957	0.0824928	1.0666	2.8577	0.00576235
Q00325-2;Q00325	Q00325-2	Phosphate carrier protein. mitochondrial	SLC25A3	SVLNKEKGSSASLVLKRLGFKGVWKGLFARI	303	22.1086	20.2565	23.1493	21.1872	22.4176	20.3882	23.9295	24.4429	21.9049	23.6004	23.6343	23.1848	24.272	23.2196	K	2	___1	1	0.00194943		+	1.44695	0.14538	1.546	2.2962	0.00579441
O75947;O75947-2;F5H608	O75947	ATP synthase subunit d. mitochondrial	ATP5H	KANVAKAGLVDDFEKKFNALKVPVPEDKYTA	73	22.9506	26.3434	21.1188	19.3587	26.5065	27.0687	27.2414	26.4306	24.1129	28.144	27.7961	27.8711	28.3793	25.9922	K	2	___2	1	4.58e-87		+	0.863311	0.345953	2.59116	1.60937	0.00579463
Q9NVH6-4;Q9NVH6-7;Q9NVH6-2;Q9NVH6-5;Q9NVH6-3;Q9NVH6;Q9NVH6-8;Q9NVH6-6	Q9NVH6-4	Trimethyllysine dioxygenase. mitochondrial	TMLHE	EQVLQKAPEEFELLSKVPLKHEYIEDVGECH	294	24.6882	18.9006	24.2034	23.9646	21.3513	26.2985	24.776	25.5733	25.1951	26.6636	24.9528	21.9054	26.5596	26.1339	K	2	___1	1	1.14e-80		+	1.22199	0.202043	1.82873	2.05369	0.00582514
P12882;Q9UKX2	P12882;Q9UKX2	Myosin-1;Myosin-2	MYH1;MYH2	MIDVERTNAACAALDKKQRNFDKILAEWKQK;MLDVERTNAACAALDKKQRNFDKILAEWKQK	1450	27.5943	24.6176	25.8105	26.6192	24.2302	26.3119	20.1515	27.5382	27.058	26.2437	27.8801	26.5185	26.757	27.1837	K	2	___1	1	1.13e-07		+	1.12972	0.231636	1.97771	1.9465	0.00583102
P11142;E9PKE3;E9PNE6;A8K7Q2;E9PS65;E9PM13;P54652	P11142;P54652	Heat shock cognate 71 kDa protein;Heat shock-related 70 kDa protein 2	HSPA8;HSPA2	DKSTGKENKITITNDKGRLSKDDIDRMVQEA;DKSTGKENKITITNDKGRLSKEDIERMVQEA	507	23.1373	23.6467	22.6865	24.6342	21.9039	22.9481	18.5094	23.8765	19.482	19.2585	17.9491	18.9729	22.371	20.1739	K	2	___1	1	0.000363379		+	1.01652	0.271184	-2.19746	-1.80845	0.00583762
P35270	P35270	Sepiapterin reductase	SPR	KGLQELKAKGKLVDCKVSAQKLLSLLEKDEF	235	18.3971	20.8009	19.448	19.0931	20.9287	19.686	19.8077	22.6905	20.1977	21.0672	22.2259	21.0035	21.2862	21.0867	K	2	___1	1	0.00317769		+	1.37206	0.159231	1.62803	2.21803	0.00583784
Q13423;D6RAI5;D6RHU2	Q13423	NAD(P) transhydrogenase. mitochondrial	NNT	QELWCKAPVKPGIPYKQLTVGVPKEIFQNEK	55	22.8729	20.4675	19.8724	19.6677	23.3961	23.9135	22.1993	23.8926	20.1304	24.2588	23.8046	24.4892	24.2654	23.4641	K	2	___1	1	2.24e-08		+	1.30758	0.176651	1.70224	2.14787	0.00594542
O75947;O75947-2;F5H608	O75947	ATP synthase subunit d. mitochondrial	ATP5H	YKANVAKAGLVDDFEKKFNALKVPVPEDKYT	72	33.2646	30.1469	31.8677	32.4472	29.1217	33.8178	33.6914	33.8355	32.2322	34.4718	33.1243	32.2889	33.8745	34.1352	K	3	___1	1	4.58e-87		+	1.60271	0.124243	1.37216	2.44143	0.00632163
P36542;P36542-2	P36542;P36542-2	ATP synthase subunit gamma. mitochondrial	ATP5C1	RLKSIKNIQKITKSMKMVAAAKYARAERELK	49	24.6317	19.1829	22.9077	22.751	22.2908	23.1908	23.0105	26.2166	22.4231	23.8931	22.7868	22.5325	24.5479	24.4268	K	2	___1	1	0.00211501		+	1.71748	0.124766	1.26591	2.53919	0.00669597
P40926;P40926-2;G3XAL0	P40926	Malate dehydrogenase. mitochondrial;Malate dehydrogenase	MDH2	IEKNLGIGKVSSFEEKMISDAIPELKASIKK	314	18.571	21.2943	20.3844	18.2954	23.7038	24.2893	23.9803	19.8772	19.3791	28.0808	27.0532	23.4203	25.807	24.9069	K	3	___2	1	1.73e-72		+	0.842933	0.355421	2.57229	1.57872	0.00678791
O14561;I3L505	O14561	Acyl carrier protein. mitochondrial;Acyl carrier protein	NDUFAB1	EGIQDRVLYVLKLYDKIDPEKLSVNSHFMKD	92	23.1635	19.9394	19.0108	20.2902	23.1292	22.2355	19.6896	22.8907	22.0484	19.3439	22.3326	25.1136	22.5347	24.0034	K	2	___1	1	0.00038742		+	1.39412	0.157377	1.54416	2.22947	0.00703496
B0QYF7;P02144;B0QYF8;F2Z2F1;Q8WVH6	B0QYF7;P02144	Myoglobin	MB	HHEAEIKPLAQSHATKHKIPVKYLEFISECI	97	23.4839	19.4992	20.4041	18.2017	18.427	19.7907	20.1196	23.4805	19.2987	21.193	22.4784	20.743	21.5581	21.7936	K	3	___2	1	8.04e-157		+	1.39962	0.159053	1.51701	2.2306	0.00752931
A0A087X1N7;P20929-3;P20929-2;P20929-4;P20929	A0A087X1N7	Nebulin	NEB	YEKTKAKSINYCETPKFKLDTVLQNFSSDKK	406	19.5783	19.0999	18.9945	21.5729	18.8771	21.618	19.4167	21.5418	21.4891	19.2874	22.4274	19.1841	21.8725	22.4304	K	2	___1	1	1.34e-06		+	1.61844	0.126069	1.29647	2.43484	0.00797514
Q6NVY1;Q6NVY1-2;F8W8A6	Q6NVY1	3-hydroxyisobutyryl-CoA hydrolase. mitochondrial	HIBCH	DSEKLAMLEEDLLALKSPSKENIASVLENYH	233	24.7486	18.941	23.5979	23.5205	23.2539	19.4128	23.2542	25.576	18.9197	26.9393	26.2605	22.5887	24.7308	24.1563	K	3	___1	1	1.4e-53		+	1.16985	0.230605	1.77749	1.9783	0.00832946
Q9UFN0	Q9UFN0	Protein NipSnap homolog 3A	NIPSNAP3A	DGIFYEFRSYYLKPSKMNEFLENFEKNAHLR	48	25.0342	23.1869	25.5478	25.2088	26.1182	26.2808	24.6157	26.1983	25.0073	28.1209	26.7008	25.5034	26.6767	26.4474	K	2	___1	1	0		+	1.67623	0.121222	1.23749	2.47998	0.00842727
Q9UKX2;Q9UKX2-2	Q9UKX2	Myosin-2	MYH2	SIYKLTGAVMHYGNLKFKQKQREEQAEPDGT	366	21.98	19.8917	18.7036	19.5797	21.3815	19.9706	20.2218	23.4653	21.1717	22.7191	20.3106	21.962	22.4054	19.8155	K	3	___1	1	0.000339391		+	1.43242	0.153235	1.44581	2.25494	0.00849154
P54296;E7EWH9;A0A0J9YVV7	P54296	Myomesin-2	MYOM2	PKFSGGSPILGYYLDKREVHHKNWHEVNSSP	749	23.4336	19.36	22.849	22.3611	20.8235	18.5374	21.9138	24.4859	18.215	24.7149	24.9439	22.0061	22.1396	23.0453	K	2	___1	1	9.29e-13		+	1.4039	0.157626	1.46747	2.22488	0.00870602
C9J8Q5;P51649;P51649-2	C9J8Q5	Succinate-semialdehyde dehydrogenase. mitochondrial	ALDH5A1	NGFEEGTTQGPLINEKAVEKVEKQVNDAVSK	359	23.6178	18.9623	24.5467	24.228	26.0882	26.1113	25.3568	26.8939	24.5634	26.9747	26.0157	24.414	26.301	26.6803	K	3	___1	1	1.13e-90		+	1.10628	0.239641	1.84741	1.9017	0.00904146
P11142;E9PKE3;E9PNE6;P11142-2;A8K7Q2;E9PN89;P54652	P11142;P54652	Heat shock cognate 71 kDa protein;Heat shock-related 70 kDa protein 2	HSPA8;HSPA2	DIVLVGGSTRIPKIQKLLQDFFNGKELNKSI;EIVLVGGSTRIPKIQKLLQDFFNGKELNKSI	348	25.1289	19.8726	25.2157	26.0394	25.2492	25.2479	24.2567	25.7169	18.7771	26.34	22.077	17.782	23.478	22.2261	K	2	___1	1	5.83e-140		+	0.970467	0.289522	-2.08761	-1.73657	0.00941973
E7EPT4;P19404	E7EPT4	NADH dehydrogenase [ubiquinone] flavoprotein 2. mitochondrial	NDUFV2	PCMLRNSDSILEAIQKKLGIKVGETTPDKLF	157	22.239	21.8439	22.9869	23.1723	24.8051	24.5162	23.449	25.8091	23.0241	25.6169	24.2582	25.1383	24.9959	23.6222	K	2	___1	1	8.41e-39		+	1.50032	0.143396	1.35033	2.31189	0.00942047
O60662;O60662-2	O60662	Kelch-like protein 41	KLHL41	LKDLLDEKKFIDCTLKAGDKSLPCHRLILSA	38	22.7138	23.3472	22.9427	24.3439	21.8304	23.7789	18.5688	24.3165	22.7115	23.8719	25.3463	23.7976	25.0436	25.1201	K	2	___1	1	0.000532843		+	1.11508	0.236615	1.81169	1.90959	0.00954612
H0YHM6;A0A0J9YWF7;A0A1B0GTY9;A0A1B0GUA1;A0A1B0GTG2;A0A1B0GW82;A0A1B0GW77;P49419-4;P49419-2;P49419;F8WDY6	H0YHM6	Alpha-aminoadipic semialdehyde dehydrogenase	ALDH7A1	ARVRQASVADYEETVKKAREAWKIWADVSLE	91	20.2138	18.8331	20.9633	21.6417	22.2642	23.5185	21.9806	22.1246	21.7317	23.3521	21.8781	22.7051	23.4196	23.124	K	2	___1	1	6.56e-20		+	1.57859	0.13535	1.27429	2.38029	0.00973707
Q12931-2;Q12931;I3L0K7	Q12931-2	Heat shock protein 75 kDa. mitochondrial	TRAP1	ALIRKLRDVLQQRLIKFFIDQSKKDAEKYAK	371	19.4751	19.6129	25.3837	24.9966	25.895	26.0488	25.0874	25.6028	24.0968	27.5644	26.2262	25.2042	26.5019	24.8044	K	2	___1	1	7.27e-05		+	1.04068	0.26523	1.92874	1.82092	0.00983559
P13805-2;P13805-3;P13805;K7EQL4;Q3B759;K7EKM3;K7ELB0	P13805-2	Troponin T. slow skeletal muscle	TNNT1	KYEINVLYNRISHAQKFRKGAGKGRVGGRWK	236	26.7285	18.0584	24.938	24.5001	26.1107	26.0885	24.0037	27.5246	24.5849	26.1239	26.2552	25.9809	26.8461	25.5258	K	3	___1	1	0.00079456		+	1.12351	0.23655	1.77336	1.91644	0.0101769
P24752;H0YEL7	P24752	Acetyl-CoA acetyltransferase. mitochondrial	ACAT1	VPYVMNRGSTPYGGVKLEDLIVKDGLTDVYN	174	28.9597	29.288	32.2096	31.9111	30.0426	32.9204	31.9102	31.9979	31.9879	34.4982	32.6491	29.7294	33.0547	32.818	K	2	___1	1	3.36e-06		+	1.46602	0.148245	1.35623	2.2724	0.010274
P07451	P07451	Carbonic anhydrase 3	CA3	VSYDGGSAKTILNNGKTCRVVFDDTYDRSML	64	19.3553	18.9241	18.6796	19.8748	20.2751	19.5935	19.7741	19.7547	21.838	18.3718	21.1591	21.094	22.335	20.8974	K	2	___1	1	0.00747953		+	1.55018	0.141156	1.28193	2.34959	0.0102987
P50213-2;P50213;H0YL72;H0YMU3;H0YLI6	P50213-2	Isocitrate dehydrogenase [NAD] subunit alpha. mitochondrial	IDH3A	DGVVQSIKLITEGASKRIAEFAFEYARNNHR	99	17.5061	21.6969	22.4222	21.7375	20.6015	20.3059	18.8605	23.6846	18.8307	23.48	22.6708	22.9441	22.9984	22.6576	K	2	___1	1	0.00314401		+	0.979513	0.289015	2.01937	1.74425	0.0105196
P09622;E9PEX6;P09622-3;P09622-2	P09622	Dihydrolipoyl dehydrogenase. mitochondrial;Dihydrolipoyl dehydrogenase	DLD	ASRGIEMSEVRLNLDKMMEQKSTAVKALTGG	122	27.1213	25.2524	24.8584	26.309	25.9202	26.1641	25.6669	27.31	25.5941	27.5179	27.704	26.5595	27.071	27.0995	K	2	___1	1	2.75e-16		+	1.83021	0.119304	1.08053	2.57697	0.0105295
Q14118	Q14118	Dystroglycan;Alpha-dystroglycan;Beta-dystroglycan	DAG1	AGIIAMICYRKKRKGKLTLEDQATFIKKGVP	782	23.9415	25.5412	26.1748	27.0801	26.485	25.3897	26.425	25.077	25.8591	26.5479	27.43	27.4427	26.5194	27.2853	K	2	___1	1	2.31e-35		+	2.69266	0.0681455	0.732014	3.03776	0.010689
P30038;P30038-2;P30038-3	P30038	Delta-1-pyrroline-5-carboxylate dehydrogenase. mitochondrial	ALDH4A1	VQYQVSPFNHGHKVAKFCYADKSLLNKAIEA	93	29.7981	23.8254	27.7875	28.8324	29.6843	30.0474	28.3621	30.1877	29.4457	30.5678	30.2959	27.9358	31.476	30.8389	K	2	___1	1	8.48e-06		+	1.07569	0.253804	1.77294	1.85277	0.0123841
P38646	P38646	Stress-70 protein. mitochondrial	HSPA9	SSLQQASLKLFEMAYKKMASEREGSGSSGTG	653	19.5056	18.8689	18.5047	19.3811	20.056	20.4906	18.8797	21.7928	20.1866	19.5446	20.3124	21.2982	19.8659	20.2145	K	2	___1	1	0.00446405		+	1.77035	0.122218	1.07549	2.50939	0.0124741
B7Z9I1;Q5T4U5;P11310;P11310-2	B7Z9I1	Medium-chain specific acyl-CoA dehydrogenase. mitochondrial	ACADM	KVPKENVLIGDGAGFKVAMGAFDKTRPVVAA	235	24.9466	20.4601	25.2894	25.4916	27.1753	27.3208	25.8606	26.3703	23.7427	29.4598	27.8194	26.6327	27.2439	26.1676	K	3	___1	1	5.89e-50		+	1.21979	0.217768	1.556	2.01124	0.0126477
A0A286YFB1;C9JZN9;P45378-4;H9KVA2;F8WA37;P45378-5;P45378-7;P45378-6;P45378-2;P45378-3;P45378;C9JCA5	A0A286YFB1;C9JZN9;H9KVA2	Troponin T. fast skeletal muscle	TNNT3	AERRKPLNIDHLGEDKLRDKAKELWETLHQL	176	28.7414	23.4285	23.6254	24.1323	25.2406	21.2071	23.3229	29.1837	20.6684	22.3062	23.3637	22.8588	19.5595	23.1288	K	3	___1	1	8.12e-94		+	1.52719	0.143857	-1.23273	-2.3059	0.0131035
B8ZZ19;P20472;H0Y3U0	B8ZZ19	Parvalbumin alpha	PVALB	KKAVGAFSATDSFDHKKFFQMVGLKKKSADD	28	18.7252	18.9005	18.3512	22.7202	20.4034	19.2917	19.0163	20.516	19.6564	18.82	22.5514	21.6562	20.1793	21.3875	K	3	___1	1	0.000350903		+	1.78287	0.12102	1.05119	2.50932	0.0133621
A0A0A0MT83;P26440;H0YN10;A0A087WVD3	A0A0A0MT83	Isovaleryl-CoA dehydrogenase. mitochondrial	IVD	NGLSEEQRQLRQTMAKFLQEHLAPKAQEIDR	58	19.1912	19.1159	19.0952	21.703	22.2874	20.6469	19.2221	21.1576	20.0846	24.3309	22.6031	21.8894	22.7832	19.4174	K	3	___1	1	6e-05		+	1.18465	0.226792	1.57207	1.96893	0.0137293
Q03252	Q03252	Lamin-B2	LMNB2	DETARERARLQIEIGKLRAELDEVNKSAKKR	123	20.5343	20.2241	22.6657	24.305	22.4704	24.4696	24.3061	19.82	19.393	22.1703	24.1846	19.2266	23.5706	22.3712	K	2	___1	1	0.000392766		+	1.57288	0.141394	-1.17699	-2.33761	0.0140844
P10606	P10606	Cytochrome c oxidase subunit 5B. mitochondrial	COX5B	EEQATGLEREIMLAAKKGLDPYNVLAPKGAS	56	29.9854	28.5298	29.4145	29.1387	27.343	29.9431	29.2068	30.3711	29.2722	30.3687	29.7994	28.0912	30.0607	29.939	K	2	___1	1	0.0022481		+	2.97589	0.0697143	0.620143	3.02241	0.0142733
P04406;P04406-2	P04406	Glyceraldehyde-3-phosphate dehydrogenase	GAPDH	INGNPITIFQERDPSKIKWGDAGAEYVVEST	84	24.6672	20.0414	23.0172	23.499	18.6787	19.4902	17.8799	24.6488	19.1083	22.9411	24.3528	24.1731	22.9961	21.7886	K	3	___1	1	1.4e-26		+	1.01001	0.276996	1.81931	1.76922	0.014537
A0A087X0W7;Q86TX2;G3V4F2;A0A087WT95;P49753	A0A087X0W7	Acyl-coenzyme A thioesterase 1;Acyl-coenzyme A thioesterase 2. mitochondrial	ACOT2;ACOT1	APEQPVTLRASLRDEKGALFQAHARYRADTL	42	26.1729	23.0063	24.2955	24.8639	25.5132	25.4037	23.7828	27.3324	25.0946	25.6802	25.3355	25.4159	25.6693	26.4276	K	3	___1	1	1.1e-22		+	1.62022	0.137323	1.13103	2.37172	0.0147058
P11216;P11217;P11217-2	P11216;P11217	Glycogen phosphorylase. brain form;Glycogen phosphorylase. muscle form	PYGB;PYGM	VAATLQDIIRRFKSSKFGCRDPVRTCFETFP;VAATLQDIIRRFKSSKFGCRDPVRTNFDAFP	316	23.9922	19.1261	20.2778	20.1822	19.1628	20.8837	18.4155	25.0052	18.8555	21.7198	22.5062	19.076	22.2201	20.6845	K	3	___1	1	0.00403437		+	1.59539	0.142268	1.14671	2.3507	0.0148096
A0A0A0MS07;A0A0A0MS08;P01857;A0A286YES1;P01860	A0A0A0MS07;A0A286YES1	Ig gamma-1 chain C region;Ig gamma-3 chain C region	IGHG1;IGHG3	YKCKVSNKALPAPIEKTISKAKGQPREPQVY;YKCKVSNKALPAPIEKTISKTKGQPREPQVY	182	26.0639	25.793	22.6573	27.4877	26.528	22.0243	18.7152	25.668	25.9223	25.4919	26.821	26.5901	26.8715	26.8751	K	2	___1	1	0.00157286		+	0.851844	0.36	2.13864	1.57209	0.0150734
P36957;P36957-2;Q86SW4	P36957	Dihydrolipoyllysine-residue succinyltransferase component of 2-oxoglutarate dehydrogenase complex. mitochondrial	DLST	MRARHKEAFLKKHNLKLGFMSAFVKASAFAL	277	27.5268	24.9109	26.92	26.9893	27.5818	28.4827	27.1356	28.9159	26.2643	29.7242	28.6937	27.5439	28.349	28.0187	K	3	___1	1	3.09e-36		+	1.58801	0.142473	1.13751	2.33855	0.0156177
A0A087X2E5;A0A087WZN1;O43837-2;O43837	A0A087X2E5	Isocitrate dehydrogenase [NAD] subunit. mitochondrial;Isocitrate dehydrogenase [NAD] subunit beta. mitochondrial	IDH3B	NMASEEKLEQVLSSMKENKVAIIGKIHTPME	105	20.9723	20.1094	22.356	20.0815	19.7568	22.0112	18.4833	22.4636	19.9057	23.2807	20.9857	22.0322	22.082	21.0679	K	2	___1	1	6.91e-07		+	1.56964	0.142102	1.14961	2.32297	0.0156862
O75531	O75531	Barrier-to-autointegration factor;Barrier-to-autointegration factor. N-terminally processed	BANF1	EKPVGSLAGIGEVLGKKLEERGFDKAYVVLG	32	21.9945	20.0994	24.0028	23.7797	24.2122	23.2415	22.2381	22.143	19.7095	19.393	23.7451	19.2175	18.9074	23.3609	K	2	___1	1	3.82e-52		+	0.956994	0.300771	-1.87026	-1.70147	0.0162246
Q02252-2;Q02252	Q02252-2	Methylmalonate-semialdehyde dehydrogenase [acylating]. mitochondrial	ALDH6A1	PQATKAEMDAAIASCKRAFPAWADTSVLSRQ	87	19.1326	19.498	18.3133	20.4986	20.9182	19.4731	18.8225	19.1411	19.7985	20.4243	21.9294	20.6224	21.9276	21.5886	K	2	___1	1	1.01e-05		+	1.42351	0.167648	1.25366	2.19183	0.0164215
P40939	P40939	Trifunctional enzyme subunit alpha. mitochondrial;Long-chain enoyl-CoA hydratase;Long chain 3-hydroxyacyl-CoA dehydrogenase	HADHA	MGLVDQLVEPLGPGLKPPEERTIEYLEEVAI	230	23.9502	20.0001	19.8125	19.3472	22.263	23.1511	21.0012	24.7561	20.3934	24.3516	23.3893	21.6022	23.5787	22.5768	K	3	___1	1	2.26e-20		+	1.11781	0.243894	1.58897	1.88532	0.0167433
P12882;Q9UKX2;Q9Y623	P12882;Q9UKX2;Q9Y623	Myosin-1;Myosin-2;Myosin-4	MYH1;MYH2;MYH4	ADALADAEERCDQLIKTKIQLEAKIKEVTER;ADSLADAEERCDQLIKTKIQLEAKIKEVTER;AEGLADAEERCDQLIKTKIQLEAKIKEVTER	916	24.7624	18.6834	21.9439	21.5093	20.3244	20.7882	20.7342	23.7591	22.3912	22.6151	23.2251	21.3746	22.355	22.3442	K	2	___1	1	0.00417782		+	1.3332	0.189225	1.33121	2.10584	0.0167966
P53778-2;P53778;B5MDL5	P53778-2	Mitogen-activated protein kinase 12	MAPK12	LDEWKRVTYKEVLSFKPPRQLGARVSKETPL	342	20.1557	22.1779	21.5807	22.8152	23.0117	22.4284	22.6265	21.5909	20.5048	18.5161	20.2511	22.2701	19.057	22.2811	K	2	___1	1	0.00407905		+	1.19996	0.229126	-1.475	-1.97213	0.0169846
P06576;H0YH81;F8W079	P06576	ATP synthase subunit beta. mitochondrial;ATP synthase subunit beta	ATP5B	GLVRGQKVLDSGAPIKIPVGPETLGRIMNVI	133	20.0712	20.4076	25.7946	20.2639	19.1732	23.6545	25.2799	23.4967	20.2778	28.1711	25.0107	18.5702	25.2501	25.127	K	3	___2	1	3.51e-98		+	1.09131	0.254786	1.60839	1.85355	0.0175691
Q96A32;H3BPK4;H3BN54	Q96A32	Myosin regulatory light chain 2. skeletal muscle isoform	MYLPF	AFKVLDPEGKGTIKKKFLEELLTTQCDRFSQ	118	23.0758	19.2872	20.3544	18.1287	19.0041	18.5119	20.1545	22.7692	19.5951	20.4932	23.0522	19.0726	21.8194	23.0237	K	2	___1	1	6.74e-29		+	1.08186	0.258202	1.61554	1.84216	0.0178736
P12883;P13533	P12883;P13533	Myosin-7;Myosin-6	MYH7;MYH6	SAHLERMKKNMEQTIKDLQHRLDEAEQIALK	1791	18.2381	21.5824	19.9142	23.0299	22.2039	21.6372	18.5634	21.1274	23.7935	21.7479	21.0957	22.8852	22.881	22.1866	K	3	___1	1	0.00014534		+	1.15829	0.233475	1.50689	1.92485	0.0179714
P09622;E9PEX6;P09622-3;P09622-2	P09622	Dihydrolipoyl dehydrogenase. mitochondrial;Dihydrolipoyl dehydrogenase	DLD	GIDMEISKNFQRILQKQGFKFKLNTKVTGAT	267	21.8814	19.2082	22.1921	20.3525	22.6539	23.1092	22.2786	24.4185	19.3713	25.3937	23.0128	22.8561	22.9992	22.8792	K	2	___2	1	0.000455463		+	1.3186	0.193296	1.32213	2.08597	0.0180567
P14618;P14618-3;B4DNK4;P14618-2;H3BTN5;H3BR70	P14618;P14618-2	Pyruvate kinase PKM;Pyruvate kinase	PKM	GKPVICATQMLESMIKKPRPTRAEGSDVANA	336	25.135	21.4213	18.0932	20.0646	19.1101	21.9254	20.0096	25.2585	20.6268	23.1991	22.7854	20.6958	21.7905	22.7443	K	3	___1	1	9.85e-10		+	1.07566	0.258198	1.62017	1.83465	0.0180818
P11532-4;P11532;E9PDN5;A0A075B6G3;A0A087WV90;A0A087WTU7	P11532-4	Dystrophin	DMD	QMNKLRKIQNHIQTLKKWMAEVDVFLKEEWP	1053	21.3167	20.2141	21.1976	21.9667	20.9777	21.3403	20.1632	19.2995	18.3161	19.7508	19.109	19.5205	21.3317	21.0632	K	3	___1	1	0.000862385		+	1.38684	0.177358	-1.25507	-2.14914	0.0181727
P11055;P12882;P13533;Q9UKX2;Q9Y623	P11055;P12882;P13533;Q9UKX2;Q9Y623	Myosin-3;Myosin-1;Myosin-6;Myosin-2;Myosin-4	MYH3;MYH1;MYH6;MYH2;MYH4	LTAKKRKLEDECSELKKDIDDLELTLAKVEK	957	27.5552	18.4688	23.2149	23.6926	21.2084	23.0184	19.7716	25.7801	24.0807	24.1571	24.3295	22.9618	23.8165	24.4499	K	2	___1	1	2.21e-44		+	0.96328	0.299957	1.80653	1.7046	0.0181889
P09622;E9PEX6;P09622-3;P09622-2	P09622	Dihydrolipoyl dehydrogenase. mitochondrial;Dihydrolipoyl dehydrogenase	DLD	EISKNFQRILQKQGFKFKLNTKVTGATKKSD	271	21.8814	19.2672	22.1921	20.1275	22.6539	23.1092	22.2786	24.4185	19.3502	25.3937	23.0128	22.8561	22.9992	22.8792	K	2	___2	1	0.000455463		+	1.2919	0.201891	1.34283	2.05868	0.018416
P12882;Q9Y623	P12882;Q9Y623	Myosin-1;Myosin-4	MYH1;MYH4	EELAKTEAKRKELEEKMVTLMQEKNDLQLQV	880	19.8451	19.0563	21.8081	22.4681	21.4985	22.5528	23.4878	19.2908	18.4553	20.5528	21.4294	19.2646	21.0985	23.7696	K	2	___1	1	9.22e-08		+	1.7626	0.12531	-0.979386	-2.4452	0.0187816
P04406;P04406-2;E7EUT5	P04406	Glyceraldehyde-3-phosphate dehydrogenase	GAPDH	QNIIPASTGAAKAVGKVIPELNGKLTGMAFR	219	18.3633	19.4564	19.6663	21.1078	20.0878	18.1489	18.4146	20.1696	21.429	17.9772	20.711	22.5476	20.7654	22.6174	K	2	___1	1	0.000821026		+	1.0909	0.254987	1.56744	1.84745	0.0195019
P61604;B8ZZL8;B8ZZ54	P61604	10 kDa heat shock protein. mitochondrial	HSPE1	GKGGEIQPVSVKVGDKVLLPEYGGTKVVLDD	70	24.3233	23.5772	23.188	23.9857	24.8424	23.9805	20.5445	25.1135	25.5434	24.7073	23.1828	26.1815	24.5404	25.0736	K	2	___1	1	0.000159551		+	1.20646	0.22792	1.41441	1.96899	0.019659
P24752	P24752	Acetyl-CoA acetyltransferase. mitochondrial	ACAT1	IPVTVTVKGQPDVVVKEDEEYKRVDFSKVPK	251	23.0923	20.8452	19.2451	21.1162	23.1893	23.7048	20.4708	23.3435	22.8445	22.4156	22.3079	22.9212	23.4646	24.1233	K	2	___1	1	8.37e-06		+	1.21491	0.229949	1.39384	1.97542	0.0202582
P00505;P00505-2	P00505	Aspartate aminotransferase. mitochondrial	GOT2	VDPRPEQWKEIATVVKKRNLFAFFDMAYQGF	234	28.9301	24.9831	30.0128	29.3837	29.8937	30.2147	26.9103	30.4726	28.4205	30.6568	29.7128	30.0458	30.1244	30.3273	K	2	___1	1	0.00269026		+	1.24827	0.220167	1.3474	2.00661	0.020801
P52179;P52179-2;A8MX12	P52179	Myomesin-1	MYOM1	VHSGRTPVTGYFVDLKEAKAKEDQWRGLNEA	1078	21.1141	19.2276	22.8113	23.4158	20.4254	23.5349	22.0749	21.286	20.4846	20.0609	20.4993	19.9569	19.6891	20.1	K	2	___1	1	5.11e-05		+	1.11782	0.247861	-1.50389	-1.87277	0.0208414
Q6NVY1;Q6NVY1-2;B8ZZZ0	Q6NVY1	3-hydroxyisobutyryl-CoA hydrolase. mitochondrial	HIBCH	NALTLNMIRQIYPQLKKWEQDPETFLIIIKG	73	26.7802	23.331	25.0155	25.3061	25.1608	26.4499	22.5167	27.357	23.7604	26.213	26.7565	26.0293	26.7028	27.1669	K	2	___1	1	0.00771672		+	1.24287	0.220639	1.34653	1.99983	0.0212049
P38646	P38646	Stress-70 protein. mitochondrial	HSPA9	HIVKEFKRETGVDLTKDNMALQRVREAAEKA	300	19.6669	20.2751	18.1483	19.5268	19.796	20.7966	18.9472	20.5844	19.125	22.7184	20.306	21.4005	21.759	21.4352	K	2	___1	1	7.5e-37		+	1.14554	0.2395	1.45309	1.8997	0.0216491
P10809;E7EXB4;E7ESH4	P10809	60 kDa heat shock protein. mitochondrial	HSPD1	ANGDKEIGNIISDAMKKVGRKGVITVKDGKT	191	26.2365	22.7063	25.7958	26.2114	26.8809	27.3034	26.9953	27.5673	26.0152	29.001	27.1887	26.3693	27.3953	27.7912	K	2	___1	1	2.73e-13		+	1.26361	0.21672	1.31406	2.01762	0.0218548
P15259	P15259	Phosphoglycerate mutase 2	PGAM2	PYYNSISKERRYAGLKPGELPTCESLKDTIA	146	22.483	19.6949	19.7604	22.4344	21.2185	21.3458	20.3138	23.2017	23.4433	22.7943	19.1681	23.7107	22.7339	24.5885	K	2	___1	1	1.18e-05		+	0.93704	0.316844	1.76996	1.66559	0.0219523
H0YDD4;P10515;E9PEJ4	H0YDD4	Acetyltransferase component of pyruvate dehydrogenase complex;Dihydrolipoyllysine-residue acetyltransferase component of pyruvate dehydrogenase complex. mitochondrial	DLAT	YLSIDVNMGEVLLVRKELNKILEGRSKISVN	294	22.2465	20.4389	19.4219	20.4234	19.9794	22.2925	19.5205	23.8354	23.3156	22.914	19.2181	22.4519	20.7702	23.0867	K	2	___2	1	5.41e-09		+	1.02885	0.276554	1.60983	1.77194	0.0220665
M0QZ10;M0QXF9;O15382;B3KSI3;M0QZP4;O15382-2	M0QZ10	Branched-chain-amino-acid aminotransferase;Branched-chain-amino-acid aminotransferase. mitochondrial	BCAT2	GGNYGPTVLVQQEALKRGCEQVLWLYGPDHQ	246	24.3679	20.475	19.1417	19.7574	26.0534	24.7776	19.3675	24.9612	25.1766	26.9866	25.1047	19.5581	25.7411	23.6595	K	3	___1	1	1.91e-57		+	0.670801	0.447458	2.4639	1.31734	0.022244
P00505;P00505-2	P00505	Aspartate aminotransferase. mitochondrial	GOT2	ADRIIGMRTQLVSNLKKEGSTHNWQHITDQI	363	32.6261	31.3547	30.5124	32.3378	31.7435	33.3065	29.2804	33.1618	31.5155	33.5243	32.8389	33.1988	33.1762	33.341	K	2	___1	1	2.31e-22		+	1.20536	0.231803	1.37073	1.95893	0.022273
O00330-3;O00330;H0YD97;O00330-2	O00330-3	Pyruvate dehydrogenase protein X component. mitochondrial	PDHX	KDAAAKGIQEIADSVKALSKKARDGKLLPEE	379	19.7822	20.5009	18.9848	19.3338	19.2716	20.2625	19.5496	22.1347	18.1026	20.0307	22.7401	22.2054	21.326	21.8114	K	2	___1	1	4.03e-14		+	1.08093	0.261218	1.52364	1.82838	0.0225447
J3QQZ9;Q9NVS9-3;Q9NVS9;A0A286YFL3;J3QQV6;Q9NVS9-4	J3QQZ9	Pyridoxine-5'-phosphate oxidase	PNPO	TCTRDGKPSARMLLLKGFGKDGFRFFTNFES	90	19.0697	19.8274	21.6832	20.5765	19.748	21.5817	19.5934	20.2044	20.2234	22.2371	21.5843	24.3171	22.7736	19.9534	K	2	___1	1	0.00544101		+	1.24944	0.221637	1.3162	2.00097	0.0226719
K7EK07;P84243;K7EMV3;B4DEB1;K7ES00;K7EP01;Q6NXT2;P68431;Q5TEC6;Q71DI3	K7EK07;P68431;Q5TEC6;Q71DI3	Histone H3;Histone H3.3;Histone H3.3C;Histone H3.1;Histone H3.2	H3F3B;H3F3A;H3F3C;HIST1H3A;HIST2H3PS2;HIST2H3A	RKSTGGKAPRKQLATKAARKSAPATGGVKKP;RKSTGGKAPRKQLATKAARKSAPSTGGVKKP	24	29.1544	19.3762	25.2407	26.3166	25.6455	25.9548	25.1957	28.7222	27.6087	26.2917	26.6592	27.3233	26.9118	26.5471	K	2	___1	1	5.12e-13		+	0.869947	0.356312	1.88287	1.58191	0.0230145
P08559;P08559-2;P08559-4;P08559-3;Q5JPU3	P08559	Pyruvate dehydrogenase E1 component subunit alpha. somatic form. mitochondrial	PDHA1	EIQEVRSKSDPIMLLKDRMVNSNLASVEELK	321	28.9694	30.4236	30.289	30.6282	31.1941	29.5821	29.7024	29.8826	30.7564	30.9065	31.3592	31.3716	31.499	30.6581	K	2	___1	1	3.78e-14		+	2.02875	0.119785	0.806371	2.56595	0.0231248
P02511;E9PR44;A0A024R3B9;H0YCW8	P02511	Alpha-crystallin B chain	CRYAB	QVSGPERTIPITREEKPAVTAAPKK______	166	27.1268	22.3751	20.5067	21.4913	25.7655	26.6498	26.161	27.6	24.9255	26.2284	27.2194	23.5436	27.0362	26.8572	K	3	___1	1	0.00181772		+	0.85651	0.364815	1.90487	1.56459	0.0233592
Q02252-2;Q02252	Q02252-2	Methylmalonate-semialdehyde dehydrogenase [acylating]. mitochondrial	ALDH6A1	WADTSVLSRQQKEIAKLITLEQGKTLADAEG	108	21.9387	24.4999	23.7325	24.7646	25.8291	25.3819	24.6301	22.8999	23.8257	20.349	19.5615	25.5328	20.0042	25.731	K	2	___1	1	5.01e-12		+	0.882993	0.353223	-1.83896	-1.59688	0.0237802
P40939	P40939	Trifunctional enzyme subunit alpha. mitochondrial;Long-chain enoyl-CoA hydratase;Long chain 3-hydroxyacyl-CoA dehydrogenase	HADHA	FTPCQLLADHANSPNKKFYQ___________	759	24.6178	19.6872	19.7577	19.4792	22.049	19.6768	19.6001	21.8958	20.9371	24.6896	22.7474	20.7638	23.3262	23.6608	K	3	___1	1	4.63e-22		+	0.859643	0.363872	1.87899	1.56722	0.0242517
H3BP28;Q99807;Q99807-2	H3BP28	5-demethoxyubiquinone hydroxylase. mitochondrial	COQ7	MEEDPEKYEELLQLIKKFRDEELEHHDIGLD	149	21.2327	19.9398	19.123	19.1686	19.8772	21.655	20.8199	22.2096	20.6211	24.5452	23.3189	19.0881	22.1842	21.2984	K	2	___1	1	0.000117482		+	0.986626	0.294131	1.63561	1.71907	0.0243366
O75947	O75947	ATP synthase subunit d. mitochondrial	ATP5H	FEKKFNALKVPVPEDKYTAQVDAEEKEDVKS	85	28.9946	25.7417	25.8062	26.9666	27.4521	27.7486	26.5441	28.9978	27.8536	27.1452	27.2585	28.3517	27.9669	28.6438	K	3	___1	1	5.71e-154		+	1.60912	0.143694	0.9948	2.29383	0.0250755
P00505;P00505-2	P00505	Aspartate aminotransferase. mitochondrial	GOT2	EQVERLIKEFSIYMTKDGRISVAGVTSSNVG	404	28.1892	27.2741	26.7822	26.658	28.5568	27.9415	25.8378	29.6063	28.1081	29.0424	27.6054	28.0486	28.1098	28.959	K	2	___1	1	4.91e-19		+	1.35427	0.193955	1.17714	2.08749	0.0254581
P49748;P49748-3;P49748-2;J3KSR4	P49748	Very long-chain specific acyl-CoA dehydrogenase. mitochondrial	ACADVL	AKAVDHATNRTQFGEKIHNFGLIQEKLARMV	372	23.2248	20.0089	19.2987	20.2991	20.2647	20.3483	18.3389	24.1655	19.2803	23.4371	22.6932	18.8468	22.1434	22.0503	K	3	___1	1	5.95e-06		+	1.00275	0.292431	1.5476	1.73001	0.0280639
C9J8Q5;P51649;P51649-2	C9J8Q5	Succinate-semialdehyde dehydrogenase. mitochondrial	ALDH5A1	RGIHDAFVKAFAEAMKKNLRVGNGFEEGTTQ	337	28.5268	21.9249	25.9207	25.7532	26.3125	26.6442	26.8539	29.1396	23.9757	27.8416	26.4811	26.5172	27.1802	27.1497	K	2	___1	1	0.00118999		+	1.70869	0.141877	0.906986	2.34367	0.0281997
P02794;G3V192;E9PRK8;E9PKY7	P02794	Ferritin heavy chain;Ferritin heavy chain. N-terminally processed;Ferritin	FTH1	KYFLHQSHEEREHAEKLMKLQNQRGGRIFLQ	69	23.5026	22.8797	20.8455	21.1959	21.2579	18.8355	20.7697	23.7937	19.5688	19.2441	18.9326	19.5823	19.6219	19.8576	K	2	___1	1	0.0017146		+	1.21451	0.229502	-1.24083	-1.941	0.0311172
P07951;Q5TCU3;Q5TCU8;U3KQK2	P07951;Q5TCU3	Tropomyosin beta chain	TPM2	GELERSEERAEVAESKCGDLEEELKIVTNNL	189	23.7295	22.0764	21.6499	24.3182	23.8624	23.3185	20.8429	24.5522	23.1179	22.1651	24.3102	25.4823	23.7754	25.5556	K	2	___1	1	2.21e-96		+	1.1447	0.24703	1.3087	1.87167	0.0317634
P40939;H0YFD6	P40939	Trifunctional enzyme subunit alpha. mitochondrial;Long-chain enoyl-CoA hydratase;Long chain 3-hydroxyacyl-CoA dehydrogenase	HADHA	GRKSGKGFYIYQEGVKRKDLNSDMDSILASL	644	18.6196	19.8443	21.4771	20.8606	23.5878	22.5546	19.136	24.2889	18.7037	24.7707	23.5743	21.855	22.2436	23.1619	K	2	___1	1	1.86e-07		+	0.831507	0.378586	1.7883	1.5214	0.0325848
P17661	P17661	Desmin	DES	LERRIESLNEEIAFLKKVHEEEIRELQAQLQ	240	23.712	23.626	24.797	18.3329	20.5998	25.1328	25.26	24.1194	23.4517	26.3792	27.7441	25.0894	24.9227	24.1842	K	2	___1	1	3.36e-44		+	0.715302	0.432522	2.06146	1.36995	0.0335302
S4R3P5;Q96EY8	S4R3P5	Cob(I)yrinic acid a.c-diamide adenosyltransferase. mitochondrial	MMAB	VVPLVQMGETDANVAKFLNRLSDYLFTLARY	159	25.6452	26.765	27.7531	27.4048	27.7354	27.7977	26.114	28.1097	26.2997	30.1246	28.7921	26.7706	29.533	27.9555	K	2	___1	1	5.39e-98		+	1.22539	0.230528	1.19571	1.94246	0.0342593
P07954-2;P07954	P07954-2	Fumarate hydratase. mitochondrial	FH	TERMPTPVIKAFGILKRAAAEVNQDYGLDPK	57	23.467	19.8417	22.2219	22.7067	23.7928	23.1271	23.1181	24.6967	20.9276	23.5642	23.6709	23.6116	23.3187	23.8093	K	2	___1	1	0.00761381		+	1.9213	0.128274	0.760529	2.423	0.0345776
P12882	P12882	Myosin-1	MYH1	ELNQVKSEVDRKIAEKDEEIDQMKRNHIRIV	1583	24.251	19.6797	23.0976	24.1089	21.7369	23.573	24.1413	23.4866	20.0464	19.1259	23.0763	19.1939	23.2758	23.6093	K	2	___1	1	2.25e-12		+	1.16573	0.244903	-1.25346	-1.88537	0.0345789
Q96GK7;Q6P2I3	Q96GK7	Fumarylacetoacetate hydrolase domain-containing protein 2A;Fumarylacetoacetate hydrolase domain-containing protein 2B	FAHD2A;FAHD2B	PALVTKDSVADPHNLKICCRVNGEVVQSGNT	234	24.8944	18.3443	18.8569	20.2279	20.1098	19.612	20.8096	24.0925	21.5255	23.4241	22.4418	19.5499	22.5913	20.0675	K	3	___1	1	6.74e-05		+	0.942596	0.325127	1.54824	1.65082	0.0347242
O75947;O75947-2	O75947	ATP synthase subunit d. mitochondrial	ATP5H	AEWVSLSKARIVEYEKEMEKMKNLIPFDQMT	117	18.93	19.6056	20.262	19.2184	19.5539	20.3843	18.9653	20.9801	19.3768	23.3254	20.8159	19.3188	20.4004	20.8645	K	2	___2	1	6.42e-05		+	1.24398	0.229437	1.16606	1.95618	0.0354363
Q5QNZ2;P24539	Q5QNZ2	ATP synthase F(0) complex subunit B1. mitochondrial	ATP5F1	YGIKKYGPFVADFADKLNEQKLAQLEEAKQA	65	18.1145	19.4091	21.5922	18.5123	22.3688	19.7569	21.1734	24.1023	19.0082	23.6681	23.4865	18.6725	22.6476	22.6651	K	2	___1	1	1.34e-45		+	0.759671	0.418183	1.9033	1.42679	0.0358195
P08237;P08237-2;P08237-3;F8VNX2;F8VZQ1;F8VSL1;F8VX13;F8VW30;F8VZI0	P08237	ATP-dependent 6-phosphofructokinase. muscle type	PFKM	FREREGRLRAAYNLVKRGITNLCVIGGDGSL	107	24.5529	20.4343	25.2731	24.8135	24.4076	25.5788	18.7507	25.7449	23.355	25.1425	25.7496	24.5179	25.3337	25.3028	K	2	___1	1	0.00147027		+	0.890731	0.354131	1.61936	1.58878	0.0361068
P04080;A0A1W2PS52	P04080	Cystatin-B	CSTB	RSQLEEKENKKFPVFKAVSFKSQVVAGTNYF	39	21.2698	19.8729	23.8504	24.1166	24.2276	23.6994	23.1776	23.4656	19.6857	23.0623	20.2769	18.2569	19.3076	23.5499	K	2	___1	1	0.00010383		+	0.799847	0.399009	-1.80134	-1.47782	0.0362411
P00367;P00367-2;P00367-3;P49448	P00367	Glutamate dehydrogenase 1. mitochondrial;Glutamate dehydrogenase 2. mitochondrial	GLUD1;GLUD2	YTMERSARQIMRTAMKYNLGLDLRTAAYVNA	527	22.7495	19.4371	18.8684	19.6392	22.185	20.2678	21.6794	24.2116	20.0803	26.5456	22.3519	18.8636	22.7111	23.3181	K	2	___1	1	1.32e-05		+	0.758761	0.417444	1.89369	1.42494	0.0365717
P09622;P09622-3;F8WDM5;A0A1W2PR83;F2Z2E3	P09622	Dihydrolipoyl dehydrogenase. mitochondrial	DLD	PGGYVAAIKAAQLGFKTVCIEKNETLGGTCL	66	23.8474	17.8428	25.1574	21.7662	23.2633	23.6196	23.1348	24.8135	22.0553	25.6328	24.5355	22.0609	24.4645	24.4619	K	2	___1	1	7.16e-20		+	1.06786	0.274297	1.34184	1.7828	0.0369059
P11142;E9PKE3;E9PNE6;P11142-2;A8K7Q2;E9PN89	P11142	Heat shock cognate 71 kDa protein	HSPA8	TLDPVEKALRDAKLDKSQIHDIVLVGGSTRI	328	19.3883	19.1093	19.2783	20.4551	21.0146	19.8937	17.8438	21.2589	18.6568	19.3801	23.7181	19.0308	23.0975	23.7373	K	3	___1	1	4.82e-07		+	0.840631	0.374558	1.69949	1.5273	0.0372701
E9PH64;Q9Y6M9;E7EWZ0;E9PF49	E9PH64	NADH dehydrogenase [ubiquinone] 1 beta subcomplex subunit 9	NDUFB9	DWHPSEKAMYPDYFAKREQWKKLRRESWERE	110	25.4949	23.4699	24.3721	23.5322	25.3291	25.3588	24.6381	26.1705	24.3689	26.9984	25.0026	24.8892	25.8857	25.6635	K	2	___1	1	0.000218161		+	1.46911	0.183425	0.9691	2.1331	0.0376953
P09622;E9PEX6;P09622-3;P09622-2	P09622	Dihydrolipoyl dehydrogenase. mitochondrial;Dihydrolipoyl dehydrogenase	DLD	VGKSEEQLKEEGIEYKVGKFPFAANSRAKTN	417	26.7874	18.8706	20.6693	22.12	23.141	23.2194	21.0439	25.1579	22.3368	22.5485	24.0767	23.9506	23.2371	23.9777	K	2	___1	1	0.00252811		+	1.05	0.279833	1.34767	1.76142	0.0384542
O14737;O14737-2;K7EQA1	O14737	Programmed cell death protein 5	PDCD5	SARARLSNLALVKPEKTKAVENYLIQMARYG	66	20.1604	20.3461	19.6832	18.8634	19.6533	19.3195	20.6915	21.7766	20.1244	20.2672	22.0055	19.3983	21.1421	21.7077	K	3	___1	0.978406	0.00576975		+	1.27477	0.22798	1.10063	1.972	0.0395327
P49411	P49411	Elongation factor Tu. mitochondrial	TUFM	RGLKREDLRRGLVMVKPGSIKPHQKVEAQVY	342	23.2905	20.9927	22.4649	22.3313	23.0226	24.2491	22.5458	22.955	23.3465	23.9699	22.8548	24.4955	24.1925	23.9077	K	3	___1	1	5.36e-08		+	1.43642	0.191379	0.975	2.10126	0.0397641
P31040-2;P31040;A0A087X1I3;P31040-3;D6RFM5;H0Y8X1	P31040-2	Succinate dehydrogenase [ubiquinone] flavoprotein subunit. mitochondrial	SDHA	PIKPNAGEESVMNLDKLRFADGSIRTSELRL	450	24.3012	19.4729	20.0236	20.7685	24.7083	20.4708	20.4313	25.7815	18.3579	24.1491	22.5946	23.0484	23.0164	23.7097	K	3	___1	1	3.54e-19		+	0.932585	0.335796	1.49729	1.63165	0.040147
P31040-2;P31040;A0A087X1I3;P31040-3	P31040-2	Succinate dehydrogenase [ubiquinone] flavoprotein subunit. mitochondrial	SDHA	FRVGSVLQEGCGKISKLYGDLKHLKTFDRGM	493	28.4774	27.0977	24.7268	26.4739	28.1073	27.7335	27.3926	29.0734	27.5283	27.5505	27.7533	28.137	28.0397	28.6338	K	3	___1	1	0.000395605		+	1.43842	0.192409	0.958114	2.09542	0.0418628
A0A0A0MTS7;Q8WZ42-12;Q8WZ42-13;Q8WZ42-11;Q8WZ42-4;Q8WZ42-7;Q8WZ42-2;Q8WZ42;Q8WZ42-8;A0A1B0GXE3;H0Y4J7	A0A0A0MTS7	Titin	TTN	PAPPKEDVKEKIFQLKAIPKKKVPEKPQVPE	13469	20.753	20.5941	18.2241	23.0107	22.2934	22.9737	21.3773	20.6442	18.9527	18.9312	19.4121	17.6903	20.5524	22.5537	K	2	___1	1	0.00545222		+	0.918254	0.344389	-1.49853	-1.61286	0.0420697
Q00325-2;Q00325;F8VVM2	Q00325-2	Phosphate carrier protein. mitochondrial	SLC25A3	PGYANTLRDAAPKMYKEEGLKAFYKGVAPLW	208	21.8296	20.7057	18.13	19.6222	21.2129	20.8314	21.2097	23.3606	20.7768	22.3651	20.4941	20.3225	22.4587	22.5927	K	2	___1	1	0.00404166		+	1.08968	0.27216	1.26129	1.79458	0.0422277
P11277-2;P11277;P11277-3	P11277-2	Spectrin beta chain. erythrocytic	SPTB	QLQAFSTYRTVEKPPKFQEKGNLEVLLFTIQ	355	19.6952	21.4501	22.0621	21.2631	20.9541	21.7353	19.6584	20.4878	20.8983	20.7566	19.3477	18.5875	19.457	19.6634	K	3	___1	0.999993	0.00304532		+	1.26019	0.230918	-1.08857	-1.95155	0.0424808
P05141;V9GYG0;P12235;P12236;Q9H0C2	P05141;V9GYG0;P12236	ADP/ATP translocase 2;ADP/ATP translocase 2. N-terminally processed;ADP/ATP translocase 1;ADP/ATP translocase 3;ADP/ATP translocase 3. N-terminally processed;ADP/ATP translocase 4;ADP/ATP translocase 4. N-terminally processed	SLC25A5;SLC25A4;SLC25A6;SLC25A31	NVIRYFPTQALNFAFKDKYKQIFLGGVDKHT;NVIRYFPTQALNFAFKDKYKQIFLGGVDKRT;NVIRYFPTQALNFAFKDKYKQLFLGGVDRHK	92	29.3667	24.431	27.1303	27.2822	28.2353	27.4478	26.4177	30.0465	27.196	30.1755	28.3947	26.6514	28.151	28.4431	K	2	___1	1	6.23e-25		+	1.09765	0.270823	1.2496	1.80192	0.0424985
Q6NVY1;Q6NVY1-2;F8W8A6;B9A058;H7C1A5	Q6NVY1	3-hydroxyisobutyryl-CoA hydrolase. mitochondrial	HIBCH	QDGSSFALEQLKVINKMSPTSLKITLRQLME	301	26.6645	19.5174	25.4016	26.3577	25.7919	28.2509	25.7735	26.9388	24.1278	27.6769	27.7946	26.2245	27.2311	27.116	K	2	___1	1	1.21e-05		+	1.02265	0.293343	1.33603	1.72504	0.0430242
P61604;B8ZZL8;B8ZZ54	P61604	10 kDa heat shock protein. mitochondrial	HSPE1	SGSKGKGGEIQPVSVKVGDKVLLPEYGGTKV	66	25.479	26.0624	26.3131	25.8299	25.7282	26.8889	26.5524	26.6679	25.8343	27.8925	26.3008	26.2394	27.8304	27.2881	K	2	___1	1	2.57e-05		+	1.8369	0.139941	0.742785	2.33075	0.0432096
O75083;D6RD66	O75083	WD repeat-containing protein 1	WDR1	GEITGHNKVINSVDIKQSRPYRLATGSDDNC	155	18.5385	19.4526	18.1973	21.667	18.8299	20.4136	20.6019	20.9979	19.3724	19.7749	21.9869	18.7192	21.4551	22.1411	K	2	___1	1	0.000994107		+	1.41246	0.201556	0.963814	2.07064	0.043516
Q86UP2-2;Q86UP2-3;Q86UP2-4;Q86UP2	Q86UP2-2	Kinectin	KTN1	NTTNQLESKQSAELNKLRQDYARLVNELTEK	450	25.1638	20.5033	24.6817	23.9018	19.8618	26.8985	25.4348	26.8669	23.4696	26.8459	24.7644	23.4768	26.6195	23.8507	K	2	___1	1	0.00454822		+	1.00679	0.299266	1.34973	1.70724	0.0437629
P24752	P24752	Acetyl-CoA acetyltransferase. mitochondrial	ACAT1	VYNKIHMGSCAENTAKKLNIARNEQDAYAIN	202	24.3888	22.4886	21.5287	20.8096	20.5229	19.9124	18.4155	25.1515	19.5151	22.7454	20.8244	25.4919	23.527	22.6884	K	3	___1	1	8.59e-11		+	0.798696	0.400749	1.69674	1.46878	0.0441385
P30046;B5MC82;P30046-2;A6NHG4;J3KQ18	P30046	D-dopachrome decarboxylase;D-dopachrome decarboxylase-like protein	DDT;DDTL	LDTNLPANRVPAGLEKRLCAAAASILGKPAD	21	25.0144	19.9285	20.0715	18.7776	19.711	25.3001	19.7622	24.7173	18.764	18.0907	24.6295	24.8568	25.487	25.4002	K	2	___1	1	0.00834971		+	0.708819	0.437406	1.91146	1.35336	0.0441695
P62942;Q5W0X3;A0A087WZM5;Q1JUQ5;Q5VVH2	P62942	Peptidyl-prolyl cis-trans isomerase FKBP1A;Peptidyl-prolyl cis-trans isomerase	FKBP1A;FKBP12-Exip2;FKBP1C	DGKKFDSSRDRNKPFKFMLGKQEVIRGWEEG	48	22.891	19.1113	19.1707	22.233	23.2134	21.919	19.7144	23.8918	19.2666	23.6189	23.3762	22.4716	22.2117	22.8082	K	2	___1	1	0.00168121		+	1.00886	0.298975	1.34174	1.70857	0.0442969
P31937	P31937	3-hydroxyisobutyrate dehydrogenase. mitochondrial	HIBADH	DAGEQVVSSPADVAEKADRIITMLPTSINAI	95	24.1381	23.0168	22.4465	21.1542	24.6815	24.0035	22.1028	26.7406	22.6674	25.8299	24.0058	23.1806	24.3691	24.2431	K	3	___1	1	1.08e-142		+	0.996862	0.30107	1.35616	1.69566	0.0444731
P30044-2;P30044;P30044-3	P30044-2	Peroxiredoxin-5. mitochondrial	PRDX5	FEGEPGNKVNLAELFKGKKGVLFGVPGAFTP	31	25.3107	18.5705	25.6887	24.8622	26.6288	25.5582	25.0007	24.8642	20.404	28.1556	26.8882	25.9196	26.5558	26.4467	K	2	___1	1	0.00020877		+	1.23911	0.233444	1.08776	1.92729	0.0448903
B4DJV2;O75390;A0A0C4DGI3;F8VTT8;F8W4S1;H0YH82;F8W642;F8VZK9;F8VX07;F8VRP1;F8VX68;F8VWQ5;F8VPF9;F8VPA1;F8W1S4;F8VRI6	B4DJV2	Citrate synthase;Citrate synthase. mitochondrial	CS	DEGIRFRGFSIPECQKLLPKAKGGEEPLPEG	90	24.9723	18.9893	20.1959	28.1347	28.5889	30.1696	27.5041	28.4347	27.9749	31.4975	29.6259	19.0711	30.92	30.1625	K	2	___1	1	0.00035551		+	0.493055	0.553092	2.73311	1.03963	0.0449184
A0A024R6I7;A0A0G2JRN3;P01009;P01009-2;P01009-3;G3V2B9	A0A024R6I7;P01009	Alpha-1-antitrypsin;Short peptide from AAT	SERPINA1	TGNGLFLSEGLKLVDKFLEDVKKLYHSEAFT	153	23.7358	22.209	24.0667	25.0068	24.3207	24.2797	23.5766	24.4714	19.266	19.6947	18.8496	25.6506	23.48	23.8348	K	2	___1	1	0.000846746		+	0.788896	0.403706	-1.70689	-1.4558	0.045024
Q9Y277;Q9Y277-2	Q9Y277	Voltage-dependent anion-selective channel protein 3	VDAC3	GWLAGYQMSFDTAKSKLSQNNFALGYKAADF	163	23.0665	20.1409	21.0698	22.0469	21.7507	23.0499	20.859	24.1524	18.2753	20.7583	19.8971	19.1195	19.3112	21.2854	K	2	___1	1	3.75e-18		+	1.02322	0.293172	-1.31207	-1.72171	0.0454423
P05976	P05976	Myosin light chain 1/3. skeletal muscle isoform	MYL1	________MAPKKDVKKPVAAAAAAPAPAPA	8	24.8683	19.1624	23.3427	21.1424	25.4367	24.5614	22.5612	24.8513	23.2391	23.4985	25.1137	25.7332	23.5107	25.2033	K	3	___1	0.774369	2.07e-26		+	0.929549	0.339636	1.43924	1.62054	0.045936
P00338;P00338-3;P00338-4	P00338	L-lactate dehydrogenase A chain	LDHA	KEVHKQVVESAYEVIKLKGYTSWAIGLSVAD	243	19.4577	19.4451	19.1565	22.4043	19.9636	23.4974	18.8739	20.5556	21.3476	22.346	23.774	19.1294	22.3511	22.9085	K	2	___1	1	0.000660102		+	0.973637	0.315639	1.37339	1.66863	0.0460066
O75323;O75323-2	O75323	Protein NipSnap homolog 2	GBAS	VPLIQEMESRIMIPLKTSPLQ__________	281	21.4779	20.3309	20.0675	21.9088	19.6398	22.6937	19.8683	22.2903	20.5001	22.6479	20.1442	23.3768	23.3438	23.5839	K	2	___1	1	0.000881343		+	0.941494	0.335358	1.4143	1.63288	0.0466064
P04406;P04406-2;E7EUT5	P04406	Glyceraldehyde-3-phosphate dehydrogenase	GAPDH	MFVMGVNHEKYDNSLKIISNASCTTNCLAPL	145	19.4409	20.7762	19.2219	21.3029	20.8359	20.4799	19.8643	23.5039	19.6311	23.6737	22.9978	20.0755	19.7732	23.2012	K	3	___1	1	6.43e-35		+	0.85114	0.374359	1.56206	1.52961	0.0468243
P03928	P03928	ATP synthase protein 8	MT-ATP8	QLKMLNTNYHLPPSPKPMKMKNYNKPWEPKW	40	25.793	24.2446	25.8291	25.1231	26.1542	27.2082	25.6919	26.7873	25.4061	27.8586	25.2318	26.1441	27.3311	27.391	K	3	___1	1	1.57e-06		+	1.51257	0.184994	0.872272	2.12583	0.0479325
A0A024R6I7;A0A0G2JRN3;P01009;P01009-2	A0A024R6I7;P01009	Alpha-1-antitrypsin;Short peptide from AAT	SERPINA1	SNGADLSGVTEEAPLKLSKAVHKAVLTIDEK	352	20.0921	22.245	21.9971	23.7539	22.2578	19.8851	20.9847	19.2949	20.0303	20.6791	22.8366	21.4911	19.0862	21.6097	K	2	___1	1	4.87e-148		+	1.49128	0.189287	-0.883971	-2.11124	0.0480564
Q15149-7;Q15149-8;Q15149-9;Q15149-5;Q15149-4;Q15149-6;Q15149-3;Q15149-2;Q15149	Q15149-7	Plectin	PLEC	EEQAQARAQAQAAAEKLRKEAEQEAARRAQA	2105	20.4774	19.0831	21.8062	21.4108	20.4676	22.0174	20.9657	20.0653	20.2698	19.7663	20.226	20.1916	19.0925	18.3477	K	2	___1	1	0.000332443		+	1.11521	0.270537	-1.18129	-1.80805	0.0481526
P53597	P53597	Succinyl-CoA ligase [ADP/GDP-forming] subunit alpha. mitochondrial	SUCLG1	KGGQTHLGLPVFNTVKEAKEQTGATASVIYV	105	27.7348	27.3624	28.3282	27.949	28.9671	28.3704	26.1087	29.3036	27.1317	30.1859	28.6513	28.4829	29.4612	28.9297	K	3	___1	1	2.31e-193		+	1.25684	0.230921	1.04653	1.93384	0.0483819
C9JMH6;A0A0J9YY65;C9JPV4;A0A0J9YWQ3;P08697;A0A0G2JPA8;P08697-2	C9JMH6	Alpha-2-antiplasmin	SERPINF2	LLLLNAIHFQGFWRNKFDPSLTQRDSF____	244	19.7405	19.8551	18.1195	19.0071	20.6353	19.7442	20.1234	20.0232	19.95	20.5454	21.0424	19.9652	21.5685	21.3845	K	2	___1	1	0.0069386		+	1.26115	0.231327	1.0363	1.93513	0.0493249
F8W7Q4;Q96A26	F8W7Q4	Protein FAM162A	FAM162A	KAAQRHETLTSLNLEKKARLKEEAAMKAKTE	129	22.9548	19.5915	19.7283	20.5598	18.4662	19.6797	19.7083	23.6924	21.1939	22.1776	20.6732	18.763	19.301	21.9892	K	3	___1	1	7.24e-07		+	1.28793	0.230127	1.01453	1.957	0.0493576
S4R3W9;P49406;H7C2J0	S4R3W9	39S ribosomal protein L19. mitochondrial	MRPL19	PVVQEPNQKVPVNELKVKMKPKPWSKRWERP	123	20.5816	19.6199	21.3163	20.8516	19.8013	21.034	21.4434	20.3523	21.4425	22.7256	22.1169	19.9209	22.7116	21.5602	K	2	___1	1	0.00307963		+	1.4753	0.191661	0.883128	2.09461	0.049788
P06576;H0YH81;F8W079	P06576	ATP synthase subunit beta. mitochondrial;ATP synthase subunit beta	ATP5B	IMNVIGEPIDERGPIKTKQFAPIHAEAPEFM	159	22.071	21.1615	20.7466	18.7843	23.9118	22.1936	20.5675	24.1671	18.93	24.5776	23.1847	25.1725	20.857	23.6098	K	3	___1	1	7.31e-10		+	0.823374	0.394059	1.58034	1.49342	0.0499788
Q9P0L0;Q9P0L0-2	Q9P0L0	Vesicle-associated membrane protein-associated protein A	VAPA	LRDEGLRLRKVAHSDKPGSTSTASFRDNVTS	211	23.3206	22.0448	21.0759	22.3935	21.6772	22.4508	20.6114	22.6141	19.7416	20.6588	19.3551	19.3368	21.6834	21.9184	K	3	___1	1	1.98e-07			1.09703	0.274	-1.18086	-1.78618	0.0506479
P17987;E7ERF2;E7EQR6;F5H282;F5GZ03	P17987	T-complex protein 1 subunit alpha	TCP1	CDEMERSLHDALCVVKRVLESKSVVPGGGAV	400	24.6385	19.4525	17.5763	18.8539	19.5617	19.9756	18.2038	23.7373	19.3816	21.5826	21.2649	20.2599	20.323	20.6581	K	2	___1	1	1.82e-07			1.00918	0.3	1.27787	1.69817	0.0513327
O95197-3;O95197-4;O95197-7;O95197-2;O95197	O95197-3	Reticulon-3	RTN3	HYVGIARDQTKSIVEKIQAKLPGIAKKKAE_	222	18.4071	20.9969	18.7336	19.9826	20.0164	20.2961	19.4655	20.0598	19.4505	20.4255	21.3392	21.5383	21.2199	21.0763	K	2	___1	1	0.00219901			1.236	0.238901	1.03019	1.90491	0.0532961
P51884	P51884	Lumican	LUM	LQHNRLKEDAVSAAFKGLKSLEYLDLSFNQI	181	20.6912	19.1069	21.3925	23.7766	22.2332	21.8317	21.235	22.5532	21.9427	21.9009	22.6296	23.7779	22.4961	22.3976	K	2	___1	1	0.000546542			1.18239	0.255588	1.06156	1.8545	0.0555687
Q9BQ69	Q9BQ69	O-acetyl-ADP-ribose deacetylase MACROD1	MACROD1	KVEEPRYKKDKQLNEKISLLRSDITKLEVDA	153	20.8445	19.1898	20.5163	19.2302	20.421	22.3576	20.4227	22.2204	19.7897	22.8243	22.5191	20.329	21.428	21.8292	K	2	___1	1	4.48e-05			1.09981	0.274527	1.1368	1.77906	0.0562
P48047;H7C0C1;H7C086	P48047	ATP synthase subunit O. mitochondrial	ATP5O	GRYATALYSAASKQNKLEQVEKELLRVAQIL	54	29.1943	24.4912	26.0257	26.0729	25.8926	27.5683	26.817	28.915	28.1047	26.9631	26.8257	27.2896	27.6361	27.7484	K	2	___1	1	6.43e-20			1.16893	0.25825	1.06009	1.83868	0.0576546
Q16698-2;Q16698	Q16698-2	2.4-dienoyl-CoA reductase. mitochondrial	DECR1	TKGAFSRLDPTGTFEKEMIGRIPCGRLGTVE	251	20.7487	22.0576	22.8293	22.3746	24.7847	24.2153	22.0337	24.4533	22.3937	23.9519	23.8475	24.1912	23.9809	24.4006	K	2	___1	1	1.6e-19			1.05992	0.289408	1.16789	1.73864	0.0578273
E5RGS7;H0YBP7;B3KPU0;A0A087WVI1;Q96JY6;Q96JY6-3;Q96JY6-5	E5RGS7	PDZ and LIM domain protein 2	PDLIM2	PQSSLPASRALATPPKLHTCEKCSTSIANQA	76	25.7114	20.7014	19.357	24.4343	24.7439	22.3034	19.4996	25.923	18.8252	18.5228	25.9715	27.4454	25.6616	25.6635	K	3	___1	1	0.00138045			0.765971	0.416065	1.60886	1.41631	0.0585681
P31937;H7BZL2	P31937	3-hydroxyisobutyrate dehydrogenase. mitochondrial	HIBADH	SINAIEAYSGANGILKKVKKGSLLIDSSTID	121	24.2007	19.0726	24.7425	25.0804	19.7609	25.0889	22.107	23.6221	18.1344	27.8675	27.8104	24.2526	23.8663	24.7412	K	3	___1	1	9.97e-74			0.838544	0.388048	1.46307	1.50264	0.059313
A2A274;Q99798	A2A274	Aconitate hydratase. mitochondrial	ACO2	AIITKSFARIHETNLKKQGLLPLTFADPADY	725	20.1077	20.4317	21.6807	22.2781	22.1025	22.3944	21.1584	24.1927	19.5546	23.0325	23.394	22.8306	22.7402	22.5146	K	3	___1	1	0.00341398			1.05377	0.291704	1.15796	1.72904	0.0602247
P07954-2;P07954	P07954-2	Fumarate hydratase. mitochondrial	FH	SQNSFRIEYDTFGELKVPNDKYYGAQTVRST	18	20.2545	22.6391	24.1829	23.9763	24.849	25.775	20.723	24.5927	22.3471	26.4565	24.3266	24.8444	24.8728	24.7415	K	2	___1	1	1.32e-43			0.870094	0.372221	1.3974	1.53724	0.0608317
P40926;P40926-2;G3XAL0	P40926	Malate dehydrogenase. mitochondrial;Malate dehydrogenase	MDH2	ETECTYFSTPLLLGKKGIEKNLGIGKVSSFE	297	25.3271	25.6108	25.8328	25.3098	26.7491	27.2399	23.9642	25.723	26.0611	27.2645	25.6105	27.4422	27.5697	27.9512	K	2	___2	1	2.4e-43			1.11949	0.274773	1.08407	1.78855	0.06115
P60903	P60903	Protein S100-A10	S100A10	FPGFLENQKDPLAVDKIMKDLDQCRDGKVGF	54	19.7496	20.8682	19.5916	22.5728	21.0699	20.8955	19.4535	20.27	21.9002	20.1749	21.9077	21.9152	22.4569	23.1792	K	2	___1	1	0.00422748			1.11392	0.27323	1.08614	1.78263	0.0616765
E7EWM1;Q15596	E7EWM1	Nuclear receptor coactivator 2	NCOA2	KLERLDSKTDPASNTKLIAMKTEKEEMSFEP	780	18.7301	19.1914	19.001	19.1799	20.9337	20.1571	18.521	20.7921	18.8413	18.9543	21.448	21.1871	20.4165	21.8972	K	2	___1	1	0.00141393			1.07277	0.289132	1.11747	1.74229	0.0632726
P13804;P13804-2;H0YLU7;H0YK49;H0YL12;H0YKF0;H0YNX6	P13804	Electron transfer flavoprotein subunit alpha. mitochondrial	ETFA	AAKLEVAPISDIIAIKSPDTFVRTIYAGNAL	139	24.2121	25.4982	18.829	24.5625	22.8492	25.0647	20.81	22.9011	20.3038	27.544	27.2828	25.664	26.6209	26.0088	K	3	___1	1	5.23e-58			0.576378	0.492063	2.07139	1.15979	0.0639878
P49590;D6RB22;D6RJE6	P49590	Probable histidine--tRNA ligase. mitochondrial	HARS2	VAEAVLTSQLKAHQEKPNFIIKTPKGTRDLS	52	23.3041	18.7534	18.4844	19.5524	19.3122	20.8012	20.0416	23.6161	19.2822	24.3189	22.3937	19.677	19.2992	21.8798	K	3	___1	1	0.000528966			0.816731	0.400603	1.45966	1.47287	0.0642471
Q04760-2;Q04760	Q04760-2	Lactoylglutathione lyase	GLO1	PDVYSACKRFEELGVKFVKKPDDGKMKGLAF	133	20.9309	19.2962	25.015	25.8582	24.8181	25.6516	24.8932	24.1377	20.4414	25.6148	26.3261	25.5386	25.4188	25.6648	K	3	___1	1	0.000584729			1.23907	0.244384	0.954143	1.88059	0.0657277
Q5QNZ2;P24539	Q5QNZ2	ATP synthase F(0) complex subunit B1. mitochondrial	ATP5F1	TQQEKETIAKCIADLKLLAKKAQAQPVM___	183	26.3425	23.8843	19.2212	26.4931	26.4342	27.674	18.4499	25.8344	24.1584	29.8365	27.4026	21.4726	28.2578	27.814	K	2	___1	1	0.00103292			0.502208	0.54887	2.3253	1.04776	0.0679543
P40939	P40939	Trifunctional enzyme subunit alpha. mitochondrial;Long-chain enoyl-CoA hydratase;Long chain 3-hydroxyacyl-CoA dehydrogenase	HADHA	ALDRGQQQVFKGLNDKVKKKALTSFERDSIF	411	29.0666	19.8366	26.069	27.0055	26.4099	27.5463	26.9536	29.059	27.999	27.2328	27.3599	27.3098	27.6861	27.6	K	2	___1	1	2.25e-109			0.719015	0.435267	1.62273	1.35106	0.0681138
Q14315-2;Q14315	Q14315-2	Filamin-C	FLNC	VRFVPQEMGPHTVAVKYRGQHVPGSPFQFTV	2258	17.8494	20.17	20.3439	18.845	21.2982	21.1096	20.0335	23.1567	19.6359	21.8446	23.2331	21.7864	19.536	20.9203	K	3	___1	1	9.01e-07			0.779159	0.418519	1.49477	1.42502	0.068444
P04075;J3KPS3;P04075-2;H3BQN4;H3BPS8;H3BUH7;H3BR04;H3BMQ8;H3BU78	P04075	Fructose-bisphosphate aldolase A;Fructose-bisphosphate aldolase	ALDOA	QVIKSKGGVVGIKVDKGVVPLAGTNGETTTQ	111	20.1312	18.9981	18.3625	25.2131	19.9077	24.4822	19.3932	23.0451	25.9081	18.8789	19.4971	23.7693	24.2336	25.142	K	3	___1	1	1e-57			0.582224	0.491438	1.99801	1.16647	0.0686607
P09622;E9PEX6;P09622-3;P09622-2	P09622	Dihydrolipoyl dehydrogenase. mitochondrial;Dihydrolipoyl dehydrogenase	DLD	STAVKALTGGIAHLFKQNKVVHVNGYGKITG	143	30.0913	24.5034	27.0284	26.8461	27.8265	28.6103	27.3551	31.584	27.0315	30.617	29.0732	26.024	28.6501	27.9681	K	3	___1	1	1.49e-190			0.932148	0.352568	1.24097	1.59519	0.0696996
P54296;E7EWH9;A0A0J9YVV7	P54296	Myomesin-2	MYOM2	LNCDGHSMTLGWKVPKFSGGSPILGYYLDKR	735	18.6875	23.4044	24.2387	24.5522	24.0876	23.2467	24.1144	23.4024	19.9362	24.2087	24.5443	19.1103	19.0753	19.5214	K	2	___1	1	1.15e-57			0.640049	0.468347	-1.79041	-1.24584	0.0714573
P12883;P13533	P12883;P13533	Myosin-7;Myosin-6	MYH7;MYH6	IETYLLEKSRVIFQLKAERDYHIFYQILSNK;IETYLLEKSRVIFQLKAERNYHIFYQILSNK	278	23.8977	22.0654	23.2795	22.5916	23.0785	25.0589	24.4957	24.154	23.9174	24.3529	24.1479	24.3496	24.9112	24.3367	K	2	___1	1	0.000363379			1.39742	0.229918	0.814628	1.97746	0.0727144
A0A0A0MTS7;Q8WZ42-12	A0A0A0MTS7	Titin	TTN	PPVKVPEAPIEVVPEKKMPLAPPKKPEVPPV	12970	21.2599	20.5699	19.2944	21.2086	22.067	21.0481	20.6899	21.3479	19.9504	18.6263	20.6063	19.0707	20.3574	19.9679	K	2	___1	1	3.71e-05			1.28259	0.239378	-0.887271	-1.89873	0.0727771
A0A087WYP2;Q8IZQ5	A0A087WYP2	Selenoprotein H	C11orf31;SELH	GRKRKAEAAVVAVAEKREKLANGGEGMEEAT	20	22.3259	19.5094	21.7955	23.1787	21.8753	22.7608	20.2171	22.2194	22.1058	22.2152	22.7716	23.3573	23.2506	22.7476	K	2	___1	1	0.000437607			1.13682	0.274824	1.00069	1.78386	0.0728456
P48735;P48735-2	P48735	Isocitrate dehydrogenase [NADP]. mitochondrial	IDH2	DGDEMTRIIWQFIKEKLILPHVDIQLKYFDL	69	26.4796	23.4099	22.4901	24.2619	19.2692	25.2187	18.7351	26.9205	22.3959	23.7897	23.8916	22.8377	25.4283	25.2524	K	3	___1	1	2.72e-10			0.746342	0.429219	1.52166	1.38192	0.0731685
Q92541	Q92541	RNA polymerase-associated protein RTF1 homolog	RTF1	PVYRVAEITGVVETAKVYQLGGTRTNKGLQL	413	22.1175	23.9567	19.5512	20.6897	21.4819	20.2625	20.2607	23.5888	18.7986	25.1666	24.5371	23.8242	23.4468	21.1458	K	3	___1	1	7.82e-15			0.644	0.466817	1.7411	1.24925	0.0756365
P28331;P28331-2;P28331-4;C9JPQ5;F8WDL5	P28331	NADH-ubiquinone oxidoreductase 75 kDa subunit. mitochondrial	NDUFS1	LSVAGNCRMCLVEIEKAPKVVAACAMPVMKG	84	23.3462	18.4839	17.8415	18.2965	20.3803	20.9912	19.7318	23.9393	22.581	23.423	19.0098	20.1102	23.3977	17.3258	K	2	___1	1	4.8e-05			0.731399	0.432925	1.53077	1.36176	0.0759268
A0A0A0MTS7;Q8WZ42-12;Q8WZ42-13;Q8WZ42-11;Q8WZ42-4;Q8WZ42-7;Q8WZ42-2;Q8WZ42;Q8WZ42-8;Q8WZ42-5;A0A0A0MRA3;Q8WZ42-3;Q8WZ42-10;Q8WZ42-9	A0A0A0MTS7	Titin	TTN	VISPSERSDKGIYTLKLENRVKTISGEIDVN	16036	25.0429	18.9738	23.9317	23.8592	23.4408	25.7872	25.0087	25.1135	23.7512	24.8931	19.4028	19.5976	18.6545	21.3286	K	2	___1	1	4.41e-05			0.587028	0.489551	-1.90043	-1.17038	0.0766294
P38646;D6RJI2	P38646	Stress-70 protein. mitochondrial	HSPA9	TKRLIGRRYDDPEVQKDIKNVPFKIVRASNG	135	21.2383	24.4633	22.8194	23.0523	24.0286	25.135	23.7498	26.0483	24.1175	25.9308	24.5336	24.5755	24.7962	23.5337	K	2	___1	1	1.1e-06			0.862072	0.382498	1.2927	1.51325	0.0768423
A0A087WXS0;P48788-2;P48788	A0A087WXS0	Troponin I. fast skeletal muscle	TNNI2	HLKSVMLQIAATELEKEESRREAEKQNYLAE	32	22.0724	19.7142	19.4044	20.7946	22.983	20.0521	19.1019	23.8559	18.9231	22.9498	23.9008	21.0497	22.2476	20.2608	K	3	___1	1	1e-72			0.857661	0.385481	1.29501	1.50783	0.0775026
O75947	O75947	ATP synthase subunit d. mitochondrial	ATP5H	PVPEDKYTAQVDAEEKEDVKSCAEWVSLSKA	95	21.5807	18.8326	19.262	18.1578	22.52	22.6351	20.6764	21.9748	19.9557	24.4198	21.6049	21.6827	22.0027	21.5087	K	2	___2	1	2.45e-30			0.81484	0.405817	1.35496	1.45896	0.0786912
H0YL11;P48735;P48735-2	H0YL11;P48735	Isocitrate dehydrogenase [NADP]. mitochondrial	IDH2	GRFKDIFQEIFDKHYKTDFDKNKIWYEHRLI	275	27.157	22.4252	23.4946	21.6874	27.1587	26.7074	25.9217	30.0982	25.1073	27.6703	25.3023	24.6735	25.9875	25.9412	K	2	___1	1	3.24e-113			0.754787	0.425895	1.46119	1.38842	0.0789072
E9PPJ3;A8MU46	E9PPJ3	Smoothelin-like protein 1	SMTNL1	RPRGPRAQNRKAIVDKFGGAASGPTALFRNT	355	20.7324	23.6387	24.3197	25.4433	24.866	22.401	22.3293	21.7136	19.1394	23.8485	25.3856	19.9013	21.7561	22.1819	K	2	___1	1	4.87e-42			0.785116	0.414415	-1.40057	-1.42402	0.0795041
A0A0A0MTS7;Q8WZ42-12;Q8WZ42-13;Q8WZ42-11;Q8WZ42-4;Q8WZ42-7;Q8WZ42-2;Q8WZ42;Q8WZ42-8;Q8WZ42-5;A0A0A0MRA3;Q8WZ42-3;Q8WZ42-10;Q8WZ42-9	A0A0A0MTS7	Titin	TTN	TRSPRVKIDTRADSSKFSLTKAKRSDGGKYV	20828	23.6421	18.8965	20.1673	19.9444	21.4667	20.4873	19.8427	22.8666	23.5775	20.6648	22.522	18.7542	22.9623	23.4793	K	2	___1	1	0.00212103			0.738018	0.432152	1.48281	1.36707	0.0804742
J3QLR8;Q9Y3D9	J3QLR8	28S ribosomal protein S23. mitochondrial	MRPS23	LFNPNFKSTCQRFVEKYTELQKLGETDEEKL	102	21.1679	19.7465	19.9237	18.1553	20.8545	20.2757	21.1379	22.076	20.2966	19.9569	21.0464	21.4579	22.0003	20.8456	K	2	___1	1	0.00242074			1.17923	0.269912	0.916886	1.80134	0.0829424
P40939	P40939	Trifunctional enzyme subunit alpha. mitochondrial;Long-chain enoyl-CoA hydratase;Long chain 3-hydroxyacyl-CoA dehydrogenase	HADHA	ALPISEIAAVSKRPEKVIGMHYFSPVDKMQL	493	27.8965	20.2835	21.6296	20.0427	19.7697	19.6421	19.9139	27.7422	20.4084	23.5207	21.1494	19.1628	22.7199	21.5224	K	3	___1	1	5.2e-14			1.06174	0.300797	1.00683	1.70029	0.0853127
P00367	P00367	Glutamate dehydrogenase 1. mitochondrial	GLUD1	MVEGFFDRGASIVEDKLVEDLRTRESEEQKR	84	23.7955	20.8728	24.66	24.0807	24.4179	25.0412	23.1605	24.2876	22.9701	25.5612	23.9577	24.9739	25.0837	24.5482	K	2	___1	1	8.12e-25			1.39591	0.231238	0.764829	1.94525	0.0855794
Q9UHQ9	Q9UHQ9	NADH-cytochrome b5 reductase 1	CYB5R1	TLLDPNEKYLLRLLDKTTVSHNTKRFRFALP	54	22.12	19.2548	19.1357	23.1399	22.9361	22.2997	19.2616	22.4489	23.1543	20.5966	22.1916	23.4912	21.7233	23.647	K	3	___1	1	4.96e-05			0.818634	0.404716	1.30073	1.45744	0.086135
Q08043;A0A087WSZ2	Q08043	Alpha-actinin-3	ACTN3	TTEQVVASFKILAGDKNYITPEELRRELPAK	849	19.5446	22.1821	23.1179	23.5393	22.5902	18.6176	17.6858	21.3323	19.9705	18.0901	20.0125	18.9515	18.81	19.5153	K	2	___1	1	0.000222277			0.69923	0.446434	-1.51361	-1.31507	0.0874249
F8W1R7;G3V1V0;P60660-2;P60660;J3KND3;G8JLA2;B7Z6Z4;F8VPF3;P14649;F8W1I5	F8W1R7;P14649	Myosin light polypeptide 6;Myosin light chain 6B	MYL6;MYL6B	VMRALGQNPTNAEVLKVLGNPKSDELKSRRV;VMRALGQNPTNAEVLKVLGNPKSDEMNVKVL	107	21.2231	20.715	18.686	25.9118	26.0322	24.9219	22.657	21.6718	18.8635	23.4588	24.2483	18.3391	20.591	20.2933	K	3	___1	1	1.6e-148			0.582578	0.492761	-1.8116	-1.16005	0.0880241
Q9Y305-3;Q9Y305-2;Q9Y305;Q9Y305-4;C9J7L8	Q9Y305-3	Acyl-coenzyme A thioesterase 9. mitochondrial	ACOT9	LSIVTALVDKIDMCKKSLSPEQDIKFSGHVS	97	21.1666	18.1856	19.0454	19.091	19.9301	18.6378	20.1814	18.4073	20.3856	23.5917	19.1603	19.9336	23.1112	21.8781	K		___2	1	1.72e-09			0.721464	0.438445	1.46141	1.34218	0.0882354
P13929;P13929-2;P13929-3	P13929	Beta-enolase	ENO3	AKYNQLMRIEEALGDKAIFAGRKFRNPKAK_	420	22.7452	28.021	27.5941	29.1627	28.5941	27.1122	25.8426	27.6215	28.4253	27.6395	28.9386	28.3872	27.6471	29.3705	K	2	___1	1	6.77e-81			0.822972	0.40654	1.27969	1.46046	0.0884819
A0A0A0MTS7;Q8WZ42-12;Q8WZ42-13;Q8WZ42-11;Q8WZ42-4;Q8WZ42-7;Q8WZ42-2;Q8WZ42;Q8WZ42-8;Q8WZ42-5;A0A0A0MRA3;Q8WZ42-3;Q8WZ42-10;Q8WZ42-9	A0A0A0MTS7	Titin	TTN	KLHDKTAVEKDEITLKCEVSKDVPVKWFKDG	14251	23.8519	18.9561	18.9545	21.3719	19.5974	22.3597	19.6579	21.527	22.8006	21.8506	20.5595	21.5827	22.8938	23.0529	K	2	___1	1	0.000245862			0.768107	0.426292	1.35967	1.39672	0.0902874
Q03252	Q03252	Lamin-B2	LMNB2	ALELENDRLLLKISEKEEVTTREVSGIKALY	81	21.6702	21.1429	19.8757	22.7112	21.6038	21.9147	21.4181	21.9272	20.2333	19.0485	22.8105	20.283	21.3063	19.1744	K	2	___1	1	0.00461756			1.31501	0.243579	-0.793343	-1.88394	0.0905195
A0A087X1N7;P20929-3;P20929-2;P20929-4;P20929	A0A087X1N7	Nebulin	NEB	DQCKDHTYKVHPDKTKFTQVTDSPVLLQAQV	501	20.8131	20.3114	19.8564	20.033	20.5538	18.7167	23.7287	21.3379	19.9638	20.9143	23.8685	19.6299	24.4167	23.6855	K	3	___1	1	6.57e-108			0.74402	0.433663	1.4005	1.36796	0.0907821
E7EPT4;P19404	E7EPT4	NADH dehydrogenase [ubiquinone] flavoprotein 2. mitochondrial	NDUFV2	ENNPDTPFDFTPENYKRIEAIVKNYPEGHKA	64	26.0255	20.164	18.6526	23.0617	23.1541	24.0763	20.408	25.7439	19.1256	26.2976	24.5421	24.5205	23.2388	23.0294	K	2	___1	1	5.53e-207			0.66344	0.460364	1.5651	1.26747	0.0915482
P40939	P40939	Trifunctional enzyme subunit alpha. mitochondrial;Long-chain enoyl-CoA hydratase;Long chain 3-hydroxyacyl-CoA dehydrogenase	HADHA	DATLTALDRGQQQVFKGLNDKVKKKALTSFE	406	30.834	25.1935	30.6036	29.9255	30.3941	31.8587	29.8206	31.6855	29.8665	32.0481	31.2402	29.5287	31.4489	31.0567	K	2	___1	1	2.25e-109			0.881369	0.377783	1.1778	1.52061	0.0916059
A0A087X1N7;P20929-3;P20929-2;P20929-4;P20929	A0A087X1N7	Nebulin	NEB	LEAEKNKRASEIISEKKYRQPPDRNKFTSIP	2445	19.8587	20.3884	21.8428	21.0661	21.2615	21.8056	21.588	21.5435	18.7779	19.0326	19.3674	19.4937	20.9233	21.3471	K	2	___1	1	0.00835903			0.984536	0.340784	-1.04651	-1.62057	0.0932544
Q9Y305-3;Q9Y305-2;Q9Y305;Q9Y305-4;C9J7L8	Q9Y305-3	Acyl-coenzyme A thioesterase 9. mitochondrial	ACOT9	PLSIVTALVDKIDMCKKSLSPEQDIKFSGHV	96	20.6294	20.18	19.5542	20.0113	18.807	20.3699	18.7838	20.3656	19.1226	23.5917	19.1689	19.9336	23.1112	21.8781	K	2	___2	1	1.72e-09			0.807715	0.411287	1.2623	1.43816	0.0955918
P07451	P07451	Carbonic anhydrase 3	CA3	AELHLVHWNPKYNTFKEALKQRDGIAVIGIF	131	31.0627	30.6025	30.4158	30.7643	31.2678	31.5811	31.1185	30.9519	31.565	30.9888	31.2321	31.8945	31.7784	32.0561	K	3	___1	1	5.11e-33			1.93799	0.185738	0.522014	2.12635	0.0973511
O00499-6;O00499-11;O00499-2;O00499-9;O00499-10;O00499-7;O00499-8;O00499-4;O00499;O00499-3;O00499-5;A0A0A0MT10;A0A087X188;Q9UBW5-2;Q9UBW5;P49418-2;P49418;S4R3J0	O00499-6	Myc box-dependent-interacting protein 1;Bridging integrator 2;Amphiphysin	BIN1;BIN2;AMPH	KIASNVQKKLTRAQEKVLQKLGKADETKDEQ	28	23.83	23.6857	19.8612	19.9972	22.1603	21.0917	20.2915	20.1051	19.2999	20.0267	19.332	18.4274	19.2938	23.9459	K	2	___1	1	0.00496433			0.673104	0.462727	-1.49811	-1.27674	0.0980876
P49748;P49748-3;P49748-2	P49748	Very long-chain specific acyl-CoA dehydrogenase. mitochondrial	ACADVL	VFAKTPVTDPATGAVKEKITAFVVERGFGGI	276	20.2224	19.2049	22.2807	21.8965	22.0547	24.1329	22.6647	21.2423	23.1954	23.2677	23.3073	21.8007	23.6478	23.3224	K	2	___1	1	6.88e-21			0.963101	0.351408	1.04669	1.59511	0.0981605
P00558	P00558	Phosphoglycerate kinase 1	PGK1	_____MSLSNKLTLDKLDVKGKRVVMRVDFN	11	24.9869	23.7756	24.09	25.8419	19.1745	19.005	23.9786	25.3783	24.9376	24.0802	24.3754	24.4591	24.211	23.6204	K	2	___1	1	0.0041467			0.691026	0.455832	1.4585	1.2992	0.0982062
K7EK07;P84243;K7EMV3;B4DEB1;K7ES00;K7EP01;Q6NXT2;P68431;Q5TEC6;Q71DI3	K7EK07;P68431;Q5TEC6;Q71DI3	Histone H3;Histone H3.3;Histone H3.3C;Histone H3.1;Histone H3.2	H3F3B;H3F3A;H3F3C;HIST1H3A;HIST2H3PS2;HIST2H3A	RKSTGGKAPRKQLATKAARKSAPATGGVKKP;RKSTGGKAPRKQLATKAARKSAPSTGGVKKP	24	29.6029	18.0629	27.758	28.9157	27.6824	26.7123	24.4765	24.4125	29.0053	27.5357	29.0209	30.0956	28.9501	28.3186	K	2	___2	1	5.12e-13			0.498587	0.554772	2.01829	1.03478	0.0985617
P11142;E9PKE3;E9PNE6;A8K7Q2;E9PS65	P11142	Heat shock cognate 71 kDa protein	HSPA8	TAEKEEFEHQQKELEKVCNPIITKLYQSAGG	601	23.9044	20.0835	19.2515	23.2919	21.02	23.5815	20.3975	23.9791	19.0089	21.4913	23.9505	22.5744	23.8688	24.6687	K	2	___1	1	5.53e-12			0.877376	0.384467	1.14449	1.5099	0.0990503
J3QS39;J3QTR3;F5H6Q2;F5GYU3;F5H2Z3;F5H265;B4DV12;F5H388;F5H747;F5GXK7;J3QKN0;Q5PY61;Q96C32;P62987;P62979;P0CG47;P0CG48;M0R1V7;Q49A90;J3QSA3;F5GZ39;M0R1M6;M0R2S1	J3QS39	Ubiquitin-60S ribosomal protein L40;Ubiquitin;60S ribosomal protein L40;Ubiquitin-40S ribosomal protein S27a;Ubiquitin;40S ribosomal protein S27a;Polyubiquitin-B;Ubiquitin;Polyubiquitin-C;Ubiquitin	UBB;RPS27A;UBC;UBA52	EPSDTIENVKAKIQDKEGIPPDQQRLIFAGK	33	20.5964	20.7437	22.7844	23.7008	23.2967	23.6375	23.5878	22.1426	20.1524	19.2197	22.1442	21.5197	22.5111	23.1458	K	2	___1	1	1.46e-05			0.932281	0.364216	-1.07311	-1.56391	0.0998977
C9K0U8;A0A0G2JLD8;E7EUY5;Q04837	C9K0U8	Single-stranded DNA-binding protein. mitochondrial	SSBP1	SVFRPGLRDVAYQYVKKGSRIYLEGKIDYGE	103	19.962	20.4834	22.7249	21.9735	21.0316	23.7158	21.2358	23.4473	22.6796	24.0915	22.5509	19.5737	23.4651	23.0582	K	2	___1	1	0.00596793			0.904415	0.371547	1.10561	1.53641	0.100015
O75947;O75947-2	O75947	ATP synthase subunit d. mitochondrial	ATP5H	SLSKARIVEYEKEMEKMKNLIPFDQMTIEDL	121	19.4975	20.0612	20.262	19.4866	19.5539	19.6049	19.0933	19.6803	19.643	23.3254	21.0084	19.3188	20.4004	20.8645	K	2	___2	1	6.42e-05			1.0476	0.316683	0.954486	1.66871	0.100019
P12883;P13533	P12883;P13533	Myosin-7;Myosin-6	MYH7;MYH6	EEGKILRAQLEFNQIKAEIERKLAEKDEEME	1569	23.7844	25.0509	24.6012	25.878	25.5493	24.3369	18.0629	24.7938	25.186	24.9849	25.8876	25.8408	25.3529	24.3564	K	2	___1	1	8.04e-45			0.761373	0.428229	1.30554	1.38174	0.10139
P13639	P13639	Elongation factor 2	EEF2	ILDPIFKVFDAIMNFKKEETAKLIEKLDIKL	308	20.0467	22.3529	21.9492	22.9899	24.343	23.7912	23.888	22.8716	19.1396	19.3622	21.9573	24.1179	21.2272	21.9496	K	2	___1	1	0.000353582			0.794031	0.415719	-1.24793	-1.41829	0.102119
A0A087WYT3;Q15185-3;Q15185-4;Q15185;B4DDC6;Q15185-2	A0A087WYT3	Prostaglandin E synthase 3	PTGES3	EFCVEDSKDVNVNFEKSKLTFSCLGGSDNFK	37	20.8011	24.2188	24.1437	23.5123	23.0915	23.5846	24.0939	24.5949	23.1803	23.4279	24.5012	24.9062	24.7683	25.7439	K	2	___1	1	0.000304276			0.901237	0.374829	1.09669	1.53076	0.102713
P12882;Q9UKX2	P12882;Q9UKX2	Myosin-1;Myosin-2	MYH1;MYH2	EARVRELEGEVESEQKRNAEAVKGLRKHERR;EARVRELEGEVESEQKRNVEAVKGLRKHERK	1837	27.2282	28.3471	28.962	28.9738	27.9484	29.6401	28.3472	28.4876	27.0268	27.8701	27.8377	26.4036	27.3203	28.1603	K	3	___1	1	8.86e-75			1.08963	0.300199	-0.905772	-1.6996	0.10305
E7EQR4;P15311;P35241;P35241-5;E9PQ82;E9PNV3;P35241-3	E7EQR4;P35241	Ezrin;Radixin	EZR;RDX	KVSAQEVRKENPLQFKFRAKFYPEDVAEELI;KVTQQDVKKENPLQFKFRAKFFPEDVSEELI	79	22.474	18.8635	18.3905	19.8348	22.461	23.2325	22.2968	23.2351	21.3661	23.3691	24.2294	19.3912	23.181	23.0182	K	2	___1	1	0.00142409			0.674847	0.461678	1.46243	1.27657	0.103059
P42765;A0A0B4J2A4;K7EME0	P42765	3-ketoacyl-CoA thiolase. mitochondrial	ACAA2	ENLAVKHKISREECDKYALQSQQRWKAANDA	181	18.7179	21.5906	19.2393	19.6901	19.4491	20.8979	18.655	18.7175	21.8527	20.7018	18.9738	21.077	21.7002	22.3019	K	2	___1	1	8.42e-16			0.963367	0.353941	1.01214	1.58717	0.10591
P06733;K7EM90	P06733	Alpha-enolase;Enolase	ENO1	APALVSKKLNVTEQEKIDKLMIEMDGTENKS	89	24.1602	24.4609	24.3193	25.4621	24.3295	25.7612	24.405	22.8198	23.5759	21.1892	25.1081	24.1111	24.5077	25.1245	K	2	___1	1	6.36e-34			1.05303	0.316359	-0.923129	-1.66493	0.10664
P11055;P13533;Q9UKX2	P11055;P13533;Q9UKX2	Myosin-3;Myosin-6;Myosin-2	MYH3;MYH6;MYH2	LFFKIKPLLKSAETEKEMATMKEEFQKIKDE;LFFKIKPLLKSAETEKEMATMKEEFQKTKDE;LYFKIKPLLKSAETEKEMATMKEEFGRIKET	853	19.5267	20.6271	19.379	22.5971	19.8474	20.5975	21.0974	20.7224	18.9142	19.1558	18.7774	18.9514	19.1513	20.6089	K	2	___1	1	3.82e-06			0.918241	0.370167	-1.05583	-1.5432	0.107274
Q9UKX2	Q9UKX2	Myosin-2	MYH2	RQAEEAEEQSNTNLAKFRKLQHELEEAEERA	1901	24.2573	18.0742	20.7729	20.4657	22.453	19.55	20.767	24.8148	21.9328	21.4508	22.7222	19.6047	22.3483	22.3087	K	3	___1	1	5.2e-72			0.764044	0.426196	1.26317	1.38042	0.108363
P48047;H7C0C1	P48047	ATP synthase subunit O. mitochondrial	ATP5O	LEQVEKELLRVAQILKEPKVAASVLNPYVKR	70	19.8615	19.9555	25.6525	24.864	24.6276	26.3608	24.9483	25.7672	24.7512	25.8015	25.782	22.309	26.1437	26.0083	K	2	___1	1	0.00220072			0.643858	0.471393	1.47039	1.23276	0.113052
P02787	P02787	Serotransferrin	TF	GAFRCLVEKGDVAFVKHQTVPQNTGGKNPDP	553	24.2007	19.5077	19.9217	20.5698	18.8042	19.1409	20.6877	23.518	20.2528	19.2757	21.0378	22.6945	20.5839	23.0257	K	3	___1	1	7.73e-17			0.877018	0.391561	1.07939	1.49754	0.113073
P48047	P48047	ATP synthase subunit O. mitochondrial	ATP5O	GMIVRIGEKYVDMSVKTKIQKLGRAMREIV_	199	26.4727	19.7527	23.9099	23.6649	23.9364	25.2208	25.4322	26.8608	24.6145	25.3806	24.1041	25.6716	24.9364	24.8608	K	2	___1	1	0.000970291			0.824249	0.407866	1.14846	1.44329	0.11308
P21796;C9JI87	P21796	Voltage-dependent anion-selective channel protein 1	VDAC1	GLKLTFDSSFSPNTGKKNAKIKTGYKREHIN	109	20.1739	19.5623	19.5683	21.2425	20.8005	21.6037	21.3022	20.6842	21.2968	18.8531	21.9191	22.0095	21.7978	23.1903	K	2	___1	1	3.91e-25			1.20176	0.277603	0.785343	1.76672	0.113816
Q5R3B4;O95563	Q5R3B4	Mitochondrial pyruvate carrier 2	MPC2	AGARGLRATYHRLLDKVELMLPEKLRPLYNH	19	22.6607	19.6948	18.5815	24.3297	24.9053	25.3568	24.3155	24.1486	20.5442	24.2351	24.3826	24.7953	25.1112	25.1338	K	2	___1	1	0.000235373			0.773415	0.426256	1.21521	1.38687	0.114851
H0YL11;P48735;P48735-2	H0YL11;P48735	Isocitrate dehydrogenase [NADP]. mitochondrial	IDH2	QKKWPLYMSTKNTILKAYDGRFKDIFQEIFD	256	26.9998	25.1435	25.4606	25.186	26.6425	26.7234	23.2048	27.6952	26.4587	25.191	26.0067	26.5815	27.2187	26.4909	K	2	___1	1	0.000622082			1.04048	0.329808	0.897443	1.64248	0.116474
A0A087WXS0;P48788-2;P48788	A0A087WXS0	Troponin I. fast skeletal muscle	TNNI2	LCKQLHAKIDAAEEEKYDMEVRVQKTSKELE	79	23.724	24.3141	23.4569	25.1638	23.7808	24.2892	22.6887	23.9665	17.7475	21.233	24.0137	23.6468	22.9467	24.2259	K	2	___1	1	2.88e-16			0.678225	0.460676	-1.37677	-1.27442	0.116477
P12883	P12883	Myosin-7	MYH7	TSNMEQIIKAKANLEKMCRTLEDQMNEHRSK	1247	25.607	22.7561	20.9381	22.7339	19.3043	20.0846	20.7218	24.6263	21.1484	21.5085	23.1089	23.0181	23.7638	23.8272	K	2	___1	1	0.00503657			0.735881	0.439108	1.26506	1.34283	0.117238
Q5QNZ2;P24539	Q5QNZ2	ATP synthase F(0) complex subunit B1. mitochondrial	ATP5F1	WVEKHVVQSISTQQEKETIAKCIADLKLLAK	172	29.5862	25.6824	26.9727	27.4886	27.9286	28.859	26.6174	30.2652	26.9943	28.5694	27.7496	27.8648	28.5093	28.4084	K	3	___1	1	0			1.24485	0.273683	0.746586	1.78853	0.117656
A0A0A0MTS7;Q8WZ42-12;Q8WZ42-13;Q8WZ42-11;Q8WZ42-4;Q8WZ42-7;Q8WZ42-2;Q8WZ42;Q8WZ42-8;Q8WZ42-5;A0A0A0MRA3;Q8WZ42-3;Q8WZ42-10;Q8WZ42-9	A0A0A0MTS7	Titin	TTN	KIGVGPPLDSTPTVAKHKFSPPSPPGKPVVT	20266	21.8913	21.0035	22.3301	22.4086	21.697	23.462	22.7743	19.3054	22.7919	21.9474	20.4198	22.1934	20.9739	20.1539	K	3	___1	1	5.2e-08			0.834885	0.405472	-1.11159	-1.45075	0.118019
O75208;H3BNT2;H3BPY0	O75208	Ubiquinone biosynthesis protein COQ9. mitochondrial	COQ9	TQCNTRLTRVLEEEQKLVQLGQAEKRKTDQF	166	22.6475	19.9698	24.7971	19.8709	25.5387	26.2422	23.7344	24.2988	24.3348	24.0503	23.9408	24.1133	26.0837	24.9084	K	3	___1	1	2.52e-162			0.726305	0.441166	1.27564	1.33104	0.118439
P14618;P14618-3;H3BQ34;H3BT25;H3BUW1;H3BTJ2;P14618-2;H3BTN5	P14618;P14618-2	Pyruvate kinase PKM;Pyruvate kinase	PKM	RTGLIKGSGTAEVELKKGATLKITLDNAYME	135	27.2147	23.5629	26.5316	27.1125	25.9469	26.64	26.8423	28.2669	19.5404	26.6031	27.1707	20.5486	25.3496	27.0873	K	2	___1	1	1.92e-07			0.696535	0.455583	-1.32633	-1.2954	0.11917
P07951;Q5TCU3;Q5TCU8	P07951;Q5TCU3	Tropomyosin beta chain	TPM2	DEVEKYSESVKEAQEKLEQAEKKATDAEADV	70	30.6545	30.3393	29.4967	30.5836	29.9772	30.1052	28.8697	30.9131	27.5144	28.9166	29.616	29.4409	28.6229	29.0873	K	2	___1	1	1.24e-83			1.0894	0.311483	-0.845	-1.67672	0.120077
P16219;E9PE82	P16219	Short-chain specific acyl-CoA dehydrogenase. mitochondrial	ACADS	SAFLVPMPTPGLTLGKKEDKLGIRGSSTANL	226	20.4883	19.0779	23.9442	24.1253	25.7421	25.8306	25.0871	19.8404	19.0154	23.8515	19.4677	23.8395	26.067	24.5736	K	3	___1	1	5.07e-14			0.84184	0.404782	-1.09149	-1.45601	0.120543
Q9NZJ6	Q9NZJ6	Ubiquinone biosynthesis O-methyltransferase. mitochondrial	COQ3	IKTAQCHKSFDPVLDKRIEYRVCSLEEIVEE	196	23.4316	19.3133	22.0872	22.7982	23.5201	23.91	23.0196	24.038	20.2864	24.1482	20.1179	19.3333	20.9252	19.9536	K	2	___1	1	0.00604242			0.690775	0.457908	-1.32534	-1.28732	0.121475
P40926;G3XAL0	P40926	Malate dehydrogenase. mitochondrial;Malate dehydrogenase	MDH2	TTLDIVRANTFVAELKGLDPARVNVPVIGGH	185	23.4367	22.4243	27.5701	26.8894	28.2843	27.7826	26.2192	26.2519	25.2343	28.7692	28.1065	25.5303	28.2234	28.6663	K	2	___1	1	3.37e-174			0.781781	0.426189	1.1679	1.39141	0.122168
G3V0I5;P49821-2;P49821;B4DE93	G3V0I5	NADH dehydrogenase [ubiquinone] flavoprotein 1. mitochondrial	NDUFV1	GTAAVIVMDRSTDIVKAIARLIEFYKHESCG	358	24.1388	19.8068	23.7852	24.6776	25.3574	21.5709	22.0173	22.2821	22.7657	24.3564	24.4779	25.5206	24.9539	25.3885	K	2	___1	1	0.000271993			0.760062	0.433211	1.19873	1.3671	0.122713
P04406;P04406-2;E7EUT5	P04406	Glyceraldehyde-3-phosphate dehydrogenase	GAPDH	FTTMEKAGAHLQGGAKRVIISAPSADAPMFV	117	24.4863	20.6774	25.2849	25.2576	25.7291	25.2771	23.6392	26.936	23.6944	25.165	25.5921	24.5628	25.6721	25.9093	K	3	___1	1	3.27e-08			0.879941	0.394494	1.02573	1.49031	0.125147
P50461	P50461	Cysteine and glycine-rich protein 3	CSRP3	TSNPSKFTAKFGESEKCPRCGKSVYAAEKVM	119	20.4046	18.6864	18.7663	19.3494	18.7351	20.5762	18.6682	21.1174	17.9708	19.8955	21.1076	20.0091	20.3117	20.2218	K	2	___1	1	0.00309014			1.15454	0.295116	0.778243	1.71542	0.126325
P48047;H7C0C1;H7C086	P48047	ATP synthase subunit O. mitochondrial	ATP5O	LYSAASKQNKLEQVEKELLRVAQILKEPKVA	60	30.6572	25.4771	28.5477	28.8675	30.4579	30.5392	30.6768	31.1647	30.4278	31.253	29.7142	28.9238	30.8053	31.291	K	2	___1	1	6.43e-20			0.751239	0.43692	1.19377	1.35478	0.126821
K7EK07;P84243;K7EMV3;B4DEB1;K7ES00;K7EP01;Q6NXT2;P68431;Q5TEC6;Q71DI3	K7EK07;P68431;Q5TEC6;Q71DI3	Histone H3;Histone H3.3;Histone H3.3C;Histone H3.1;Histone H3.2	H3F3B;H3F3A;H3F3C;HIST1H3A;HIST2H3PS2;HIST2H3A	TKQTARKSTGGKAPRKQLATKAARKSAPATG;TKQTARKSTGGKAPRKQLATKAARKSAPSTG	19	29.6029	19.3865	27.758	28.9157	27.6824	26.7123	24.4765	24.4125	29.0053	27.5357	29.0209	30.0956	28.9501	28.3186	K	2	___2	1	5.12e-13			0.489655	0.563312	1.8292	1.01499	0.127152
O75947	O75947	ATP synthase subunit d. mitochondrial	ATP5H	FEKKFNALKVPVPEDKYTAQVDAEEKEDVKS	85	21.5807	20.1748	18.9919	18.8029	22.52	22.6351	19.0792	21.9748	19.5463	24.4198	21.6049	21.6827	22.0027	21.5087	K	3	___2	1	5.71e-154			0.695812	0.458341	1.27933	1.28978	0.128774
A0A0G2JIW1;P0DMV9;P0DMV8;P0DMV8-2;V9GZ37;P17066;P48741	A0A0G2JIW1;P17066	Heat shock 70 kDa protein 1B;Heat shock 70 kDa protein 1A;Heat shock 70 kDa protein 6;Putative heat shock 70 kDa protein 7	HSPA1B;HSPA1A;HSPA6;HSPA7	ELCSDLFRSTLEPVEKALRDAKLDKAQIHDL;ELCSDLFRSTLEPVEKALRDAKLDKAQIHDV	320	20.3057	18.9499	22.4254	24.2797	24.5522	24.1348	24.239	24.6453	23.3009	23.3806	24.9531	22.1075	24.3793	25.1386	K	2	___1	1	1.92e-06			0.690012	0.459845	1.28837	1.28269	0.129124
V9GZ45;V9GYU9;V9GYP4;D6RB81;Q9UHK6-4;Q9UHK6-2;Q9UHK6;Q9UHK6-5	V9GZ45	Alpha-methylacyl-CoA racemase	AMACR	VSRLGRGKRSLVLDLKQPRGAAVLRRLCKRS	58	21.2075	20.1936	20.9495	18.4135	21.0037	22.6003	18.5797	22.0994	19.6932	22.926	20.9453	19.4734	23.1638	22.4478	K	2	___1	1	0.00653392			0.795965	0.424181	1.11444	1.40172	0.129701
P06576	P06576	ATP synthase subunit beta. mitochondrial	ATP5B	FYMVGPIEEAVAKADKLAEEHSS________	522	30.3019	26.9809	27.4734	26.9998	27.0916	28.0776	27.0331	30.8837	26.4018	29.1421	27.8674	27.7255	28.5915	27.8589	K	2	___1	1	6.62e-05			1.37124	0.258656	0.644657	1.83567	0.130624
P49411	P49411	Elongation factor Tu. mitochondrial	TUFM	RGLKREDLRRGLVMVKPGSIKPHQKVEAQVY	342	22.3695	20.4845	22.0575	18.8255	23.4343	23.9433	19.5902	23.2171	19.5765	23.9407	20.7065	23.1234	23.8792	23.9264	K	3	___2	1	5.36e-08			0.807166	0.415551	1.095	1.41286	0.130663
E7ETT4;E7ETT1;E9PDR0;C9JQS9;E7EX59;P05166;P05166-2;C9JVY9;E7ENC1;F8WBI9;C9JAW3;C9JVW9;H7C5C9	E7ETT4	Propionyl-CoA carboxylase beta chain. mitochondrial	PCCB	VEHRCADFGMAADKNKFPGDSVVTGRGRING	101	20.8144	19.7124	24.6158	24.8387	26.1912	26.3552	25.4717	26.5374	25.4413	25.3542	25.4136	23.3033	26.2354	26.171	K	2	___1	1	0.000495814			0.590515	0.493349	1.49383	1.15626	0.131181
P12883;P13533	P12883;P13533	Myosin-7;Myosin-6	MYH7;MYH6	ERLEDEEEMNAELTAKKRKLEDECSELKKDI;ERLEDEEEMNAELTAKKRKLEDECSELKRDI	939	25.9488	24.3744	22.5801	24.1954	24.2196	25.0074	24.2491	24.0154	23.7884	21.8498	23.0585	24.0552	24.5639	24.5557	K	3	___1	1	1.68e-88			1.31511	0.270704	-0.6697	-1.8049	0.131604
P26447	P26447	Protein S100-A4	S100A4	ELKELLTRELPSFLGKRTDEAAFQKLMSNLD	48	22.8184	18.9358	19.8724	20.0179	20.4113	19.6158	19.5914	22.8048	19.4109	22.1484	22.5708	18.8997	23.0003	19.9095	K	2	___1	1	0.00483931			0.819726	0.415353	1.06877	1.42421	0.133015
P40939	P40939	Trifunctional enzyme subunit alpha. mitochondrial;Long-chain enoyl-CoA hydratase;Long chain 3-hydroxyacyl-CoA dehydrogenase	HADHA	DATLTALDRGQQQVFKGLNDKVKKKALTSFE	406	22.8971	21.5932	23.9682	22.3828	23.5163	25.3539	23.435	24.6493	22.1043	26.9581	24.1767	23.3745	24.7913	23.4812	K	2	___2	1	2.25e-109			0.956413	0.3666	0.9127	1.55256	0.133993
P40939	P40939	Trifunctional enzyme subunit alpha. mitochondrial;Long-chain enoyl-CoA hydratase;Long chain 3-hydroxyacyl-CoA dehydrogenase	HADHA	ALDRGQQQVFKGLNDKVKKKALTSFERDSIF	411	22.8971	21.5932	23.9682	22.3828	23.5163	25.3539	23.435	24.6493	22.1043	26.9581	24.1767	23.3745	24.7913	23.4812	K	2	___2	1	2.25e-109			0.956413	0.365458	0.9127	1.55256	0.133993
Q9NZB8-7;Q9NZB8-2;Q9NZB8-8;Q9NZB8	Q9NZB8-7	Molybdenum cofactor biosynthesis protein 1;Cyclic pyranopterin monophosphate synthase;Cyclic pyranopterin monophosphate synthase accessory protein	MOCS1	LLGPVAFKLVQQNQLKKGDALVVAQLAGVQA	425	20.6822	20.2705	19.9097	19.6128	20.3053	21.1547	20.8806	23.4133	19.5685	21.8162	20.9344	22.0702	20.774	20.7294	K	2	___1	1	0.000393113			0.941326	0.371483	0.927172	1.5393	0.134038
P43155-2;P43155;P43155-3	P43155-2	Carnitine O-acetyltransferase	CRAT	SNHRNSWAKAYNTLIKDKVNRDSVRSIQKSI	247	19.6944	18.3952	21.7832	22.4224	23.1252	23.6978	23.106	23.0419	24.3302	23.4011	22.9839	21.3728	24.3619	22.132	K	3	___1	1	2.09e-37			0.649783	0.471642	1.3428	1.23142	0.134113
A0A0C4DGA2;O75521-2;O75521	A0A0C4DGA2	Enoyl-CoA delta isomerase 2. mitochondrial	ECI2	ALRISKEVIRKREREKLHAVNAEECNVLQGR	329	24.6056	19.6263	18.116	19.9046	19.5869	19.839	18.6698	24.498	18.5192	21.5133	20.9503	19.0039	21.9612	21.4131	K	3	___1	1	8.23e-95			0.812285	0.416086	1.07297	1.41558	0.134413
P31937;H7BZL2	P31937	3-hydroxyisobutyrate dehydrogenase. mitochondrial	HIBADH	TIDPAVSKELAKEVEKMGAVFMDAPVSGGVG	149	25.8428	25.4989	26.3447	25.7811	26.9451	27.2202	26.1848	27.2508	26.2483	28.194	26.9139	26.118	27.5936	26.6514	K	2	___1	1	2.39e-39			1.18397	0.293662	0.736057	1.72306	0.134441
Q5VTT5;Q5VTT5-2	Q5VTT5	Myomesin-3	MYOM3	ESPVRSPRFAVLDLEKKKSYVFRVRAMNQYG	567	20.281	19.2328	18.7079	22.4465	20.5365	22.7068	21.734	21.8073	20.2722	21.7293	21.917	20.9228	22.7302	22.2909	K	2	___1	1	0.00268033			1.01032	0.352477	0.8606	1.59663	0.135058
P04406;P04406-2;E7EUT5	P04406	Glyceraldehyde-3-phosphate dehydrogenase	GAPDH	GAAKAVGKVIPELNGKLTGMAFRVPTANVSV	227	25.6179	20.8735	27.7422	29.4038	28.5082	24.5984	27.4324	26.8108	25.3634	27.4261	28.4888	28.4105	28.072	27.7957	K	2	___1	1	7.58e-08			0.741838	0.440468	1.17013	1.33926	0.135505
P12883;P13533	P12883;P13533	Myosin-7;Myosin-6	MYH7;MYH6	RQAEEAEEQANTNLSKFRKVQHELDEAEERA	1895	24.6244	19.4226	19.4478	22.8222	23.3842	22.7142	21.7097	25.1316	22.6	19.4705	23.156	22.9798	23.5664	23.3526	K	3	___1	1	2.67e-153			0.990006	0.356284	0.875972	1.57925	0.135763
P55084;P55084-2;F5GZQ3	P55084	Trifunctional enzyme subunit beta. mitochondrial;3-ketoacyl-CoA thiolase	HADHB	IRHSRKMRKLMLDLNKAKSMGQRLSLISKFR	188	18.6793	21.9045	23.1484	23.7191	24.6617	25.9636	25.3151	23.3893	23.107	24.3045	24.1068	25.1394	24.7723	26.1781	K	2	___1	1	0.000376446			0.796986	0.4255	1.08653	1.39851	0.136161
P61604;B8ZZ54	P61604	10 kDa heat shock protein. mitochondrial	HSPE1	VLLPEYGGTKVVLDDKDYFLFRDGDILGKYV	86	24.3993	19.2874	18.942	20.1609	19.8325	21.5882	20.4755	24.7515	18.8049	26.0086	23.7338	21.189	20.7433	19.4543	K	2	___1	1	1.73e-10			0.605469	0.489336	1.42851	1.17412	0.136483
P54725-2;P54725-3;P54725;K7ENJ0;K7ELW1	P54725-2	UV excision repair protein RAD23 homolog A	RAD23A	MAVTITLKTLQQQTFKIRMEPDETVKVLKEK	16	19.6951	20.9412	20.6888	21.9906	23.2477	22.0926	18.9008	20.1336	20.9675	19.7751	20.3262	21.4078	19.3123	19.3626	K	2	___1	1	7.27e-05			0.963841	0.369228	-0.895957	-1.55607	0.136912
P16219;E9PE82	P16219	Short-chain specific acyl-CoA dehydrogenase. mitochondrial	ACADS	RIPKDSILGEPGMGFKIAMQTLDMGRIGIAS	262	21.2397	23.1727	22.0861	19.0036	24.3377	24.4656	19.7255	21.6521	20.4228	26.3504	25.8196	23.8189	23.0451	23.8899	K	3	___1	1	1.37e-14			0.545305	0.530667	1.56684	1.09211	0.139828
F2Z337;P02144;B0QYF8;F2Z2F1;Q8WVH6	F2Z337;P02144	Myoglobin	MB	KHLKSEDEMKASEDLKKHGATVLTALGGIL_;KHLKSEDEMKASEDLKKHGATVLTALGGILK	63	31.7041	29.4786	29.583	29.9317	27.8949	29.4597	28.4374	31.5142	28.1832	28.9636	28.5659	18.6276	29.5654	30.0956	K	2	___1	1	0.000604707			0.543087	0.530425	-1.5677	-1.08876	0.1408
Q96I99;H0Y852	Q96I99	Succinyl-CoA ligase [GDP-forming] subunit beta. mitochondrial	SUCLG2	SGLPITSAIDLEDAAKKAVASVAKK______	423	23.9286	18.3125	18.2997	19.3484	24.787	23.3099	22.9213	24.7821	19.8084	23.9542	24.1592	20.2578	24.1867	24.3049	K	3	___1	1	1.26e-32			0.564292	0.518616	1.50656	1.11781	0.141209
O14983-2;O14983;O14983-3	O14983-2	Sarcoplasmic/endoplasmic reticulum calcium ATPase 1	ATP2A1	AVGDKVPADIRILAIKSTTLRVDQSILTGES	169	22.0249	20.7077	19.1086	22.2836	22.1591	22.7444	21.7578	22.7737	20.112	21.0111	21.0299	19.2975	20.297	18.3752	K	2	___1	1	0.00411235			0.751454	0.437396	-1.1271	-1.34603	0.142245
P35270	P35270	Sepiapterin reductase	SPR	LKAKGKLVDCKVSAQKLLSLLEKDEFKSGAH	240	22.2871	18.4899	18.3656	19.5538	22.0989	21.024	19.9214	23.2693	20.8008	23.2077	22.5314	19.2797	21.7114	19.8513	K	2	___1	1	0.000188688			0.664381	0.467429	1.27299	1.24566	0.142644
P51608;P51608-2	P51608	Methyl-CpG-binding protein 2	MECP2	AKTQPAVATAATAAEKYKHRGEGERKDIVSS	449	21.8469	18.9194	19.557	21.5592	21.5454	21.034	21.3833	21.0144	18.7933	19.6494	20.5285	19.0845	21.0608	20.5742	K	3	___1	1	6.38e-05			1.14897	0.305656	-0.7343	-1.68758	0.143321
P49411	P49411	Elongation factor Tu. mitochondrial	TUFM	ALEGRDPELGLKSVQKLLDAVDTYIPVPARD	238	20.6137	20.806	19.7205	19.4996	20.5089	20.3197	20.5557	20.663	19.4444	23.3725	23.2748	22.6779	21.6716	19.2343	K	3	___1	1	4.21e-30			0.710111	0.454834	1.18777	1.29913	0.143401
B0QYF7	B0QYF7	Myoglobin	MB	________MKASEDLKKHGATVLTALGGILK	8	31.7041	29.4786	29.583	29.9317	27.8949	29.4597	28.4374	31.5142	28.1832	28.9636	28.5659	18.7876	29.5654	30.0956	K	2	___1	1	0.00234499			0.544262	0.53077	-1.54484	-1.08944	0.144278
Q09666	Q09666	Neuroblast differentiation-associated protein AHNAK	AHNAK	QGPGSKLNVPKMKVPKFSVSGAKGEETGIDV	438	19.9384	22.587	21.4971	21.9226	21.6328	20.2115	19.78	22.1806	21.5381	21.1438	22.283	22.0912	22.3206	22.8569	K	2	___1	1	0.00558944			0.856715	0.405701	0.977828	1.45181	0.145305
P40926;P40926-2;G3XAL0	P40926	Malate dehydrogenase. mitochondrial;Malate dehydrogenase	MDH2	IPELKASIKKGEDFVKTLK____________	335	23.8112	19.5894	22.6103	23.3531	24.201	23.4742	19.9932	23.9958	21.5316	23.8717	23.4414	24.0284	23.1313	23.9247	K	2	___1	1	1.16e-14			0.848987	0.408527	0.984643	1.44393	0.145898
P31415	P31415	Calsequestrin-1	CASQ1	VLEDKGVGFGLVDSEKDAAVAKKLGLTEVDS	113	26.2453	26.1654	22.7488	27.1491	26.5358	25.7577	25.0689	26.5107	26.4441	26.082	26.24	27.4799	26.1313	27.3332	K	2	___1	1	1.82e-15			0.87919	0.401908	0.935743	1.46888	0.15042
Q9UKX2	Q9UKX2	Myosin-2	MYH2	EGEVESEQKRNAEAVKGLRKHERRVKELTYQ	1844	20.0944	21.3708	21.4519	21.3572	20.0263	22.2616	19.1749	21.5623	23.5163	19.2423	22.0728	22.5033	21.8385	22.7843	K	2	___1	1	0.0033342			0.739032	0.443175	1.11181	1.3276	0.150777
P40939	P40939	Trifunctional enzyme subunit alpha. mitochondrial;Long-chain enoyl-CoA hydratase;Long chain 3-hydroxyacyl-CoA dehydrogenase	HADHA	YLEEVAITFAKGLADKKISPKRDKGLVEKLT	254	19.3923	20.4302	20.9806	21.596	22.5725	24.6899	24.4427	23.197	22.2202	24.0289	22.7476	20.4778	24.7653	24.5023	K	2	___2	1	0.00149973			0.724439	0.448883	1.11927	1.30946	0.154581
P51884;CON__Q05443	P51884	Lumican	LUM	DIKSFCKILGPLSYSKIKHLRLDGNRISETS	305	23.8704	20.5306	23.8715	26.01	24.4277	24.5808	23.3952	24.1585	20.1095	18.7954	24.7508	19.4953	25.0619	25.1305	K	2	___1	1	0.0018764			0.614362	0.489548	-1.31204	-1.1784	0.15629
P07954-2;P07954	P07954-2	Fumarate hydratase. mitochondrial	FH	DKYYGAQTVRSTMNFKIGGVTERMPTPVIKA	37	29.8687	28.4906	29.5609	29.0853	30.443	30.8445	29.6713	30.6204	28.575	31.0481	29.7742	30.0924	31.2801	30.6736	K	2	___1	1	1.42e-80			1.37537	0.273233	0.585642	1.78788	0.156503
P40926;P40926-2;G3XAL0	P40926	Malate dehydrogenase. mitochondrial;Malate dehydrogenase	MDH2	TYFSTPLLLGKKGIEKNLGIGKVSSFEEKMI	301	25.277	25.5593	27.3282	26.5787	28.8541	28.3496	27.4208	26.8671	25.9188	30.2873	27.6231	27.4095	29.2499	28.2528	K	2	___2	1	2.04e-264			0.902091	0.396082	0.891544	1.48412	0.156945
P40926;P40926-2;G3XAL0	P40926	Malate dehydrogenase. mitochondrial;Malate dehydrogenase	MDH2	LLLGKKGIEKNLGIGKVSSFEEKMISDAIPE	307	25.277	25.5593	27.3282	26.5787	28.8541	28.3496	27.4208	26.8671	25.9188	30.2873	27.6231	27.4095	29.2499	28.2528	K	3	___2	1	2.04e-264			0.902091	0.397243	0.891544	1.48412	0.156945
A0A0A0MTS7;Q8WZ42-12;Q8WZ42-13;Q8WZ42-11;Q8WZ42-4;Q8WZ42-7;Q8WZ42-2;Q8WZ42;Q8WZ42-8;Q8WZ42-5;A0A0A0MRA3;Q8WZ42-3;Q8WZ42-10;Q8WZ42-9	A0A0A0MTS7	Titin	TTN	VERREKKSLRWVRAIKTPVSDLRCKVTGLQE	23191	22.3209	20.6309	22.0931	22.1074	21.0879	24.039	23.008	22.088	23.1111	18.5352	18.9995	19.3042	22.7764	22.6182	K	2	___1	1	0.0062006			0.713871	0.455954	-1.12209	-1.29586	0.158116
B4DJV2;O75390;A0A0C4DGI3	B4DJV2	Citrate synthase;Citrate synthase. mitochondrial	CS	LTQLQKEVGKDVSDEKLRDYIWNTLNSGRVV	314	22.3027	23.6914	27.0995	26.3967	26.7496	28.005	27.4325	29.7419	25.869	28.4484	26.8092	24.9921	27.9933	27.427	K	2	___1	1	1.5e-05			0.578981	0.512934	1.37193	1.13143	0.160575
A0A0G2JIW1;P0DMV9;P0DMV8;P0DMV8-2;V9GZ37	A0A0G2JIW1	Heat shock 70 kDa protein 1B;Heat shock 70 kDa protein 1A	HSPA1B;HSPA1A	DLVLVGGSTRIPKVQKLLQDFFNGRDLNKSI	349	23.1941	19.0401	18.8948	24.1954	23.6063	21.3007	21.6015	24.0227	19.5994	19.9167	23.8507	18.0477	18.0289	19.6841	K	2	___1	1	5.77e-23			0.633327	0.485085	-1.24039	-1.19912	0.163844
P62937;F8WE65;C9J5S7	P62937	Peptidyl-prolyl cis-trans isomerase A;Peptidyl-prolyl cis-trans isomerase A. N-terminally processed;Peptidyl-prolyl cis-trans isomerase	PPIA	VPKTAENFRALSTGEKGFGYKGSCFHRIIPG	44	19.2809	18.7175	24.6474	25.7109	25.2428	25.2738	24.3571	25.3247	24.2069	24.9204	25.6986	22.1687	25.573	25.4035	K	2	___1	1	5.22e-12			0.545912	0.530085	1.43791	1.08625	0.164069
P31040-2;P31040;A0A087X1I3;P31040-3	P31040-2	Succinate dehydrogenase [ubiquinone] flavoprotein subunit. mitochondrial	SDHA	FRVGSVLQEGCGKISKLYGDLKHLKTFDRGM	493	23.0882	18.883	18.3759	19.1978	19.8531	22.8842	20.4826	24.9855	20.6647	25.1828	21.2221	18.6995	20.5267	21.0051	K	3	___2	1	0.000395605			0.57684	0.512912	1.36023	1.12748	0.164197
O00483	O00483	Cytochrome c oxidase subunit NDUFA4	NDUFA4	PNDQYKFYSVNVDYSKLKKERPDF_______	73	18.9199	19.7735	21.0594	20.9018	23.0362	22.9996	21.8114	23.0628	19.0035	24.0697	23.869	20.0909	23.4158	23.696	K	2	___1	1	0.000538791			0.629935	0.486066	1.2437	1.19465	0.164645
P07951;Q5TCU3;Q5TCU8;U3KQK2	P07951;Q5TCU3	Tropomyosin beta chain	TPM2	KIVTNNLKSLEAQADKYSTKEDKYEEEIKLL	213	27.862	26.9787	25.6479	26.9046	28.8974	28.7878	23.7852	28.9027	26.6105	27.3502	28.2526	29.2195	27.4493	28.9097	K	2	___1	1	5.5e-12			0.69944	0.46086	1.1187	1.27622	0.16502
H7C1Y0;B5MC44;Q9UDX4-3;Q9UDX4-2;Q9UDX4	H7C1Y0	SEC14-like protein 3	SEC14L3	LEENYPETLKFMLIVKATKLFPVGYNLMKPF	159	19.7993	18.7055	20.5084	19.1973	19.6401	21.6564	19.4086	20.4584	24.0366	19.4392	21.0544	19.2655	21.2001	21.5938	K	2	___1	1	0.00620007			0.672809	0.466505	1.16177	1.24559	0.16533
E7EVA0;P27816-6;P27816;P27816-2;P27816-4;P27816-5;H7C4C5;H0Y2V1;F8W9U4	E7EVA0;H0Y2V1	Microtubule-associated protein;Microtubule-associated protein 4	MAP4	IKHKPGGGDVKIESQKLNFKEKAQAKVGSLD	2205	18.5296	19.4233	20.5371	22.0368	21.657	20.2807	18.8316	21.4967	20.2581	20.1325	22.045	20.845	21.3099	21.8882	K	2	___1	1	0.00169561			0.813211	0.42709	0.954186	1.39384	0.167512
P62328	P62328	Thymosin beta-4;Hematopoietic system regulatory peptide	TMSB4X	EKFDKSKLKKTETQEKNPLPSKETIEQEKQA	26	22.3954	19.8648	17.6771	20.9733	21.409	17.5136	19.5413	21.689	18.9746	20.496	21.3395	23.2798	19.6856	20.3115	K	2	___1	1	4.76e-12			0.846521	0.416297	0.9145	1.42493	0.168212
P12883;P13533	P12883;P13533	Myosin-7;Myosin-6	MYH7;MYH6	IERKLAEKDEEMEQAKRNHLRVVDSLQTSLD;IERKLAEKDEEMEQAKRNHQRVVDSLQTSLD	1587	20.5564	21.3722	21.8611	22.2841	22.2094	20.3354	21.5481	22.1152	20.4838	20.3782	18.6917	20.5381	19.6193	21.576	K	3	___1	1	3.9e-05			0.801089	0.427161	-0.966342	-1.38153	0.168218
P23109-2;P23109;A0A1B0GTL6	P23109-2	AMP deaminase 1	AMPD1	FKLPEIDDAMRNFAEKVFASEVKDEGGRQEI	52	21.2751	20.2168	23.1651	23.5158	23.5442	23.7758	21.3795	21.7367	19.4945	23.2731	23.3167	18.7661	22.9848	20.1627	K	2	___1	1	0.000673888			0.757456	0.441421	-1.01967	-1.33695	0.168905
P10916;G3V1V8	P10916	Myosin regulatory light chain 2. ventricular/cardiac muscle isoform	MYL2	LDYKNLVHIITHGEEKD______________	165	29.5342	23.4319	24.0268	24.8224	25.9882	25.4739	24.8688	30.0317	20.9253	25.2326	24.2768	23.4149	24.1881	23.7343	K	2	___1	1	9.34e-55			0.846705	0.414136	-0.906071	-1.42309	0.170933
P08670;B0YJC4;B0YJC5	P08670	Vimentin	VIM	VAAKNLQEAEEWYKSKFADLSEAANRNNDAL	294	21.4172	19.6602	23.6594	25.0933	23.8285	24.1441	22.2093	24.1877	22.5199	23.2294	24.5652	23.6291	24.1507	24.4427	K	2	___1	1	4.79e-12			0.799658	0.427969	0.958957	1.37825	0.171065
Q13423;E9PCX7	Q13423	NAD(P) transhydrogenase. mitochondrial	NNT	TQASTLYSNNITKLLKAISPDKDNFYFDVKD	397	18.357	21.0473	21.0121	19.619	21.906	21.9947	20.8895	21.4331	19.6169	21.5874	20.9967	22.537	22.1748	22.8244	K	2	___1	1	0.00366015			0.844411	0.415046	0.906386	1.42045	0.171648
H7BY37;Q8NEZ4-2;Q8NEZ4;Q8NEZ4-3	H7BY37	Histone-lysine N-methyltransferase 2C	KMT2C	QENKTLVLSDKHSPQKKSTVTNEVKTEVLSP	320	22.8602	18.6292	22.3956	23.8598	20.155	23.3059	22.8176	23.9875	21.0039	21.7289	23.4645	23.9546	23.5003	23.1555	K	3	___2	1	7.66e-05			0.787971	0.431505	0.967414	1.36555	0.172864
H0YDD4;P10515;E9PEJ4	H0YDD4	Acetyltransferase component of pyruvate dehydrogenase complex;Dihydrolipoyllysine-residue acetyltransferase component of pyruvate dehydrogenase complex. mitochondrial	DLAT	TPAGPKGRVFVSPLAKKLAVEKGIDLTQVKG	194	26.564	19.9341	24.7788	25.7404	26.4351	19.2699	25.8004	26.0154	24.3782	24.3535	25.2668	26.0731	24.8105	26.4261	K	2	___1	1	0.00401396			0.605072	0.494205	1.25727	1.16056	0.173485
O75874	O75874	Isocitrate dehydrogenase [NADP] cytoplasmic	IDH1	YLNTFEFMDKLGENLKIKLAQAKL_______	406	20.0625	19.5787	19.4358	22.9906	18.9471	21.9256	18.2723	21.3105	19.9531	19.6505	21.8979	22.6749	21.3315	21.8163	K	2	___1	1	0.000721895			0.716266	0.458984	1.0603	1.29033	0.173998
O43676;C9JKQ2	O43676	NADH dehydrogenase [ubiquinone] 1 beta subcomplex subunit 3	NDUFB3	YRQWKIEGTPLETIQKKLAAKGLRDPWGRNE	34	30.6262	30.2479	30.7205	30.0812	31.0456	31.8079	29.6626	31.492	30.34	31.7505	30.8981	30.3587	32.2978	32.2178	K	2	___1	1	3.96e-38			1.01297	0.364981	0.737571	1.55145	0.179005
Q8TCS8	Q8TCS8	Polyribonucleotide nucleotidyltransferase 1. mitochondrial	PNPT1	KRTPQKLFTPSPEIVKYTHKLAMERLYAVFT	285	23.2914	21.4477	21.7263	20.7268	19.7991	21.9561	19.9681	24.6775	19.471	19.0678	19.8262	19.5991	20.1103	19.9615	K	3	___1	1	1.3e-11			0.842742	0.416268	-0.886014	-1.41338	0.179192
Q9NPJ3;Q9NPJ3-2	Q9NPJ3	Acyl-coenzyme A thioesterase 13;Acyl-coenzyme A thioesterase 13. N-terminally processed	ACOT13	TLAFTSVDLTNKATGKLIAQGRHTKHLGN__	127	25.2166	18.8606	24.6729	25.0968	26.4241	26.7524	25.8961	27.0502	26.2211	26.6877	25.8846	23.5256	26.6449	26.4866	K	2	___1	1	0.000180379			0.540868	0.535293	1.36874	1.07455	0.181841
Q16698-2;Q16698;E5RJG7;E5RFV2;E5RID6	Q16698-2	2.4-dienoyl-CoA reductase. mitochondrial	DECR1	QNTEALQSKFFSPLQKAMLPPNSFQGKVAFI	40	27.4137	24.6446	27.9168	27.9515	28.6759	28.4038	27.6699	28.2915	26.8851	28.8888	27.9811	28.2289	28.7681	28.3049	K	2	___1	1	7.97e-83			1.07822	0.35521	0.667457	1.58185	0.190692
P61088;F8VSD4;F8VV71;F8VQQ8	P61088	Ubiquitin-conjugating enzyme E2 N	UBE2N	PKVRFMTKIYHPNVDKLGRICLDILKDKWSP	82	23.768	20.1111	20.2294	19.2206	21.0857	17.8847	19.1611	24.7149	19.1441	19.3243	21.2897	21.4177	20.8214	21.1216	K	3	___1	1	0.000209113			0.790158	0.436832	0.910443	1.35625	0.190812
A0A0A0MTS7;Q8WZ42-12;Q8WZ42-13;Q8WZ42-11;Q8WZ42-4;Q8WZ42-7;Q8WZ42-2;Q8WZ42;Q8WZ42-8;Q8WZ42-5;A0A0A0MRA3;Q8WZ42-3;Q8WZ42-10;Q8WZ42-9	A0A0A0MTS7	Titin	TTN	DKHTSGKLIIEGIRLKFLTPLKDVTAKEKES	14498	22.9964	18.4462	25.3235	24.9186	24.1444	26.6711	25.3301	22.4538	22.6262	19.7457	24.2585	19.5556	24.8512	24.7536	K	2	___1	1	0.00200726			0.524651	0.547479	-1.36939	-1.0501	0.191227
P08559;P08559-2;P08559-4;P08559-3	P08559	Pyruvate dehydrogenase E1 component subunit alpha. somatic form. mitochondrial	PDHA1	MGTSVERAAASTDYYKRGDFIPGLRVDGMDI	244	25.7503	20.1562	24.5624	24.1851	24.9308	25.1033	24.0926	27.1072	24.017	25.998	25.1129	24.3241	24.6315	24.0359	K	2	___1	1	3.29e-05			0.780022	0.438404	0.920843	1.34616	0.191303
P17661	P17661	Desmin	DES	VERDNLLDDLQRLKAKLQEEIQLKEEAENNL	193	21.9138	19.4264	21.02	24.1496	22.3346	19.8161	19.6821	21.8502	22.888	20.4194	23.2496	21.3105	22.7053	23.8736	K	2	___1	1	8.05e-05			0.629481	0.489047	1.13629	1.18327	0.192632
P24752	P24752	Acetyl-CoA acetyltransferase. mitochondrial	ACAT1	NDGAAALVLMTADAAKRLNVTPLARIVAFAD	302	25.6631	24.9376	27.192	27.0149	27.6812	27.5643	23.2863	26.2642	25.9082	29.4111	28.3399	25.41	28.0212	27.0858	K	3	___1	1	1.72e-214			0.704452	0.462187	1.01443	1.26795	0.192923
P48047;H7C068	P48047	ATP synthase subunit O. mitochondrial	ATP5O	LKTVLKSFLSQGQVLKLEAKTDPSILGGMIV	172	27.4414	26.4868	29.8106	29.1976	30.3194	31.2146	30.3308	29.136	25.7636	31.4784	25.2794	20.7031	30.849	30.7262	K	3	___1	1	2e-80			0.459104	0.603476	-1.55221	-0.956358	0.193808
P35609;P35609-2;F6THM6	P35609	Alpha-actinin-2	ACTN2	TAEQVIASFRILASDKPYILAEELRRELPPD	842	24.9322	19.4275	19.2756	24.2022	24.6703	23.0847	23.4059	24.8787	20.2024	24.2554	25.3027	22.9857	24.849	23.9802	K	2	___1	1	2.37e-43			0.665013	0.47528	1.0651	1.22316	0.195747
P14618;P14618-3;B4DNK4;P30613-2;P30613;P14618-2;H3BTN5;H3BR70	P14618;P14618-2	Pyruvate kinase PKM;Pyruvate kinase;Pyruvate kinase PKLR	PKM;PKLR	IMVARGDLGIEIPAEKVFLAQKMMIGRCNRA	305	24.7612	19.7377	23.3087	25.4835	24.0916	24.4975	23.8553	25.6363	23.7654	25.2071	26.0724	22.5568	23.949	25.5054	K	2	___1	1	5.15e-21			0.712167	0.461716	0.993843	1.27463	0.195983
O75569-3;O75569-2;O75569	O75569-3	Interferon-inducible double-stranded RNA-dependent protein kinase activator A	PRKRA	GKGASKKQAKRNAAEKFLAKFSNISPENHIS	162	18.7223	19.1045	20.1096	20.8433	18.8161	20.8444	19.9428	20.0762	20.4791	19.1486	21.0405	22.6952	20.6087	20.7596	K	2	___1	1	0.00493541			0.769513	0.441488	0.917843	1.33263	0.196657
P17661	P17661	Desmin	DES	EQRGSEVHTKKTVMIKTIETRDGEVVSEATQ	449	17.9736	21.5201	20.4768	23.3195	21.0241	22.3983	19.1494	19.3717	20.9606	19.3843	23.5493	23.2978	22.9069	23.3778	K	2	___1	1	0.00106812			0.706101	0.46139	0.998086	1.26749	0.197356
A0A0C4DFM5;Q9UBF9;B4DT68	A0A0C4DFM5	Myotilin	MYOT	DTLLHNGNQRLTYEEKMARRLLGPQNAAAVF	184	22.9929	22.0924	21.4893	23.1362	22.9625	23.1878	22.896	22.0682	21.4387	20.6974	23.5165	22.2317	22.7059	22.7749	K	2	___1	1	0.00217449			1.4747	0.290256	-0.474828	-1.73937	0.199421
P16219;E9PE82	P16219	Short-chain specific acyl-CoA dehydrogenase. mitochondrial	ACADS	ETHQMLLQTCRDFAEKELFPIAAQVDKEHLF	51	23.9685	23.3458	24.479	22.6775	26.8599	25.3436	25.3266	25.4821	22.4778	26.8452	25.843	25.6123	26.2773	25.961	K	2	___1	1	2.2e-36			0.752208	0.447125	0.928258	1.31339	0.200335
P42765;A0A0B4J2A4;K7EME0	P42765	3-ketoacyl-CoA thiolase. mitochondrial	ACAA2	ADGAGAVIIASEDAVKKHNFTPLARIVGYFV	269	26.5357	23.8005	27.3172	27.2634	29.5849	28.8175	27.8796	27.7995	27.6717	29.6237	28.1711	26.7121	29.5596	29.0756	K	3	___1	1	0			0.658063	0.48157	1.05921	1.21306	0.200896
P49748;P49748-3;P49748-2	P49748	Very long-chain specific acyl-CoA dehydrogenase. mitochondrial	ACADVL	VVERGFGGITHGPPEKKMGIKASNTAEVFFD	298	25.4424	20.4215	24.3536	24.3713	26.4606	25.7361	22.9485	25.7197	24.02	26.4881	25.399	24.759	25.166	25.1122	K	3	___1	1	2.6e-15			0.702806	0.463664	0.990001	1.26192	0.201475
P49411	P49411	Elongation factor Tu. mitochondrial	TUFM	EDLRRGLVMVKPGSIKPHQKVEAQVYILSKE	347	22.3695	20.4845	22.0575	19.8351	23.4343	23.9433	19.3918	23.2171	19.6382	23.9407	20.7065	23.1234	23.8792	23.9264	K	3	___2	1	5.36e-08			0.703364	0.464186	0.987928	1.26231	0.201896
Q6NVY1;B9A058	Q6NVY1	3-hydroxyisobutyryl-CoA hydrolase. mitochondrial	HIBCH	RGHDFHEGVRAVLIDKDQSPKWKPADLKEVT	353	24.9389	24.3056	25.7151	24.8112	25.3248	26.6167	23.502	26.2002	24.0523	26.4119	27.0332	24.829	26.2261	26.257	K	2	___1	1	5.44e-08			0.838419	0.42648	0.827914	1.39274	0.202237
P54868-3;P54868-2;P54868	P54868-3	Hydroxymethylglutaryl-CoA synthase. mitochondrial	HMGCS2	LQYMIFHTPFCKMVQKSLARLMFNDFLSASS	255	20.5666	20.1006	20.5145	19.1146	19.0169	24.6862	20.6925	20.8961	20.0715	24.1383	21.8633	20.814	24.1183	19.6211	K	2	___1	1	0.0014511			0.709309	0.463221	0.975815	1.26795	0.203164
P08559;P08559-2;P08559-4;P08559-3;Q5JPT9;Q5JPU0;Q5JPU1;Q5JPU2	P08559	Pyruvate dehydrogenase E1 component subunit alpha. somatic form. mitochondrial	PDHA1	EGPPVTTVLTREDGLKYYRMMQTVRRMELKA	63	24.1302	22.7935	21.7026	21.5358	21.6104	21.8514	20.7032	24.5243	22.8588	23.6031	20.9195	22.4658	22.0087	23.1971	K	2	___1	1	0.00209228			0.921517	0.405891	0.750028	1.45995	0.203627
P22695;H3BRG4	P22695	Cytochrome b-c1 complex subunit 2. mitochondrial	UQCRC2	ATAAGDVIKAAYNQVKTIAQGNLSNTDVQAA	359	23.2484	21.3463	22.1618	21.7212	24.0107	22.4948	22.2736	23.6601	23.6161	23.5677	22.1064	23.7742	22.8878	22.2876	K	3	___1	1	4.85e-79			1.03977	0.370481	0.6633	1.54211	0.204325
V9GYG0;P12235	V9GYG0	ADP/ATP translocase 1	SLC25A4	FLKDFLAGGVAAAVSKTAVAPIERVKLLLQV	23	28.379	27.4763	27.6627	28.1246	27.685	28.659	27.0622	28.4384	27.4731	29.0241	27.791	28.6783	29.1952	28.7348	K	3	___1	1	6.67e-265			1.1226	0.354243	0.6123	1.58968	0.205416
P13805-2;P13805-3;P13805;K7EQL4;Q3B759;K7EKM3;K7ELB0;M0QY38	P13805-2	Troponin T. slow skeletal muscle	TNNT1	LESEKFDLMAKLKQQKYEINVLYNRISHAQK	221	23.6555	19.9509	21.0251	22.2174	23.037	21.8807	19.5515	23.0365	22.0247	22.8478	22.262	22.1634	22.7525	22.1167	K	2	___1	1	1.58e-17			0.812367	0.432051	0.840786	1.36592	0.207479
P15531;P15531-2;E7ERL0;J3KPD9;E5RHP0;C9K028;F6XY72;Q32Q12;P22392-2;P22392	P15531;Q32Q12	Nucleoside diphosphate kinase A;Nucleoside diphosphate kinase;Nucleoside diphosphate kinase B	NME1;NME2;NME1-NME2	IKPDGVQRGLVGEIIKRFEQKGFRLVGLKFM	26	20.5651	21.5095	18.3478	19.5985	21.8052	18.7614	19.7526	22.8986	18.8176	20.6861	21.3182	21.7978	20.2588	21.3826	K	2	___1	1	0.00773838			0.695877	0.468105	0.974229	1.25038	0.209921
P00568;Q5T9B7;H0Y4J6	P00568	Adenylate kinase isoenzyme 1	AK1	ETYYKATEPVIAFYEKRGIVRKVNAEGSVDS	166	26.0695	26.8504	28.1317	28.1256	27.921	27.5743	27.8607	27.1516	26.7369	28.4911	29.019	28.0752	27.7345	28.4973	K	3	___1	1	4.07e-74			1.48643	0.294502	0.453199	1.71738	0.212007
H0Y5L2;Q9NTX5-6;Q9NTX5-2;Q9NTX5;H0YCS9;Q9NTX5-3	H0Y5L2	Ethylmalonyl-CoA decarboxylase	ECHDC1	IIGSRQALKVLSGALKLDSKNALNIGMVEEV	225	25.8633	19.4799	23.7236	24.3224	25.0826	25.6343	25.2446	25.9464	22.1114	26.8369	25.0971	23.9415	25.847	25.714	K	2	___1	1	0.000508313			0.766429	0.447904	0.877657	1.32009	0.21249
P12882;Q9UKX2	P12882;Q9UKX2	Myosin-1;Myosin-2	MYH1;MYH2	LEQQVDDLEGSLEQEKKIRMDLERAKRKLEG;LEQQVDDLEGSLEQEKKLRMDLERAKRKLEG	1048	26.5905	23.4961	23.4704	24.3102	24.9354	25.0256	24.4492	25.7416	23.0572	24.2171	24.1512	23.1101	24.0073	23.6281	K	3	___1	1	8.83e-83			1.07528	0.369994	-0.623543	-1.55312	0.21356
P12883;P13533	P12883;P13533	Myosin-7;Myosin-6	MYH7;MYH6	LEQQVDDLEGSLEQEKKVRMDLERAKRKLEG	1042	26.5905	23.4961	23.4704	24.3102	24.9354	25.0256	24.4492	25.7416	23.0572	24.2171	24.1512	23.1101	24.0073	23.6281	K	3	___1	1	8.83e-83			1.07528	0.367674	-0.623543	-1.55312	0.21356
Q9Y623	Q9Y623	Myosin-4	MYH4	LEQQVDDLEGSLEQEKKLCMDLERAKRKLEG	1046	26.5905	23.4961	23.4704	24.3102	24.9354	25.0256	24.4492	25.7416	23.0572	24.2171	24.1512	23.1101	24.0073	23.6281	K	3	___1	1	8.83e-83			1.07528	0.36883	-0.623543	-1.55312	0.21356
Q14315-2;Q14315	Q14315-2	Filamin-C	FLNC	RSPFEVQVSPEAGVQKVRAWGPGLETGQVGK	573	21.2723	18.94	22.2114	23.1381	23.4135	22.4313	20.4789	22.9	22.6414	20.9926	23.2567	23.7814	21.5434	23.8983	K	2	___1	1	1.29e-71			0.658072	0.483857	1.01833	1.20752	0.213731
P12883;P13533	P12883;P13533	Myosin-7;Myosin-6	MYH7;MYH6	EIQLSHANRMAAEAQKQVKSLQSLLKDTQIQ	1641	21.5864	21.9051	19.1334	20.5844	18.5093	18.4968	20.0159	22.3249	20.3948	21.6733	18.9866	21.9217	21.537	20.7002	K	2	___1	1	0.00200752			0.63956	0.487576	1.04389	1.18612	0.214967
P18859;P18859-2;A8MUH2	P18859	ATP synthase-coupling factor 6. mitochondrial	ATP5J	GVTAVAFNKELDPIQKLFVDKIREYKSKRQT	41	27.281	29.3952	30.7248	30.4016	31.479	31.2786	30.3009	32.0468	30.2305	33.0063	31.3174	29.2358	31.2798	31.1668	K	2	___1	1	3.88e-38			0.625293	0.490198	1.06033	1.16879	0.217262
P12882;Q9UKX2;Q9UKX3	P12882;Q9UKX2;Q9UKX3	Myosin-1;Myosin-2;Myosin-13	MYH1;MYH2;MYH13	EEDHKNILRLQDLVDKLQAKVKSYKRQAEEA;EEDRKNILRLQDLVDKLQAKVKSYKRQAEEA	1876	26.4652	19.9281	26.0701	20.2971	20.4498	19.2668	19.4413	26.7496	25.7412	19.9841	19.7994	18.8357	25.4068	27.2702	K	2	___1	1	2.01e-07			0.389313	0.647145	1.69551	0.845079	0.218733
O14548	O14548	Cytochrome c oxidase subunit 7A-related protein. mitochondrial	COX7A2L	TVYDYAGKNKVPELQKFFQKADGVPVYLKRG	65	20.0682	19.9634	21.9532	22.8766	22.0747	20.3211	19.4109	21.1555	19.854	23.8557	22.9807	19.5195	23.787	22.9745	K	2	___1	1	1.38e-07			0.618755	0.49332	1.06554	1.16046	0.219124
P12883;P13533	P12883;P13533	Myosin-7;Myosin-6	MYH7;MYH6	ERCDQLIKNKIQLEAKVKEMNERLEDEEEMN	918	27.5794	19.5451	19.9454	26.7563	26.9707	26.5292	27.2897	26.4709	27.0268	25.1017	26.3208	24.8838	27.4345	27.1483	K	2	___1	1	0.00358811			0.471004	0.592399	1.39586	0.968615	0.220062
P12883;P13533	P12883;P13533	Myosin-7;Myosin-6	MYH7;MYH6	KLELDDVTSNMEQIIKAKANLEKMCRTLEDQ;KLELDDVTSNMEQIIKAKANLEKVSRTLEDQ	1240	21.4736	21.8348	22.9665	24.4106	24.0713	25.4148	24.6589	23.0723	23.8403	25.4641	24.8802	22.7126	25.3266	25.2313	K	2	___1	1	3.71e-72			0.806714	0.437015	0.813843	1.35204	0.220527
Q8NCU8-2;Q8NCU8	Q8NCU8-2	Uncharacterized protein encoded by LINC00116	LINC00116	LRRRYLDWRKRRLQDKLAATQKKLDLA____	45	19.2942	23.5083	20.8205	23.016	22.6306	22.2881	22.2138	24.4032	22.1412	21.1256	23.7556	22.9618	23.0747	23.4009	K	2	___1	1	5.89e-05			0.647891	0.485	1.01307	1.1932	0.220618
P56381	P56381	ATP synthase subunit epsilon. mitochondrial	ATP5E	RQAGLSYIRYSQICAKAVRDALKTEFKANAE	21	24.7142	21.8264	22.1494	22.7686	23.1463	23.2448	21.4316	25.2492	23.3226	25.2726	23.1407	20.4036	24.6731	24.2336	K	2	___1	1	0.000130039			0.652193	0.485554	1.00201	1.19738	0.222072
B0QYF7;P02144;B0QYF8;F2Z2F1;Q8WVH6	B0QYF7;P02144	Myoglobin	MB	EAEIKPLAQSHATKHKIPVKYLEFISECIIQ	99	23.4839	20.9222	19.3627	20.0128	19.655	19.3636	18.5737	23.4805	18.2762	21.193	22.4784	19.7327	21.5581	21.7936	K	3	___2	1	6.54e-09			0.640392	0.489398	1.0198	1.18407	0.222294
A0A0A0MTS7;Q8WZ42-12;Q8WZ42-13;Q8WZ42-11;Q8WZ42-4;Q8WZ42-7;Q8WZ42-2;Q8WZ42;Q8WZ42-8;Q8WZ42-5;A0A0A0MRA3;Q8WZ42-3;Q8WZ42-10;Q8WZ42-9	A0A0A0MTS7	Titin	TTN	TGKWVRVNKTPIADLKFRVTGLYEGNTYEFR	20329	18.4024	19.9388	21.4739	21.1147	20.2084	22.5503	22.4013	19.4615	19.1576	19.4608	20.009	18.9664	21.8163	22.4103	K	2	___1	1	0.00391688			0.944183	0.405436	-0.686843	-1.45774	0.224644
P56381	P56381	ATP synthase subunit epsilon. mitochondrial	ATP5E	AVRDALKTEFKANAEKTSGSNVKIVKVKKE_	37	24.7951	20.4481	20.8227	20.5564	20.8522	22.3998	21.867	25.0652	21.483	22.0113	21.3913	21.1292	21.8148	22.5288	K	2	___1	1	7.39e-05			1.22129	0.3466	0.526043	1.60626	0.227798
Q99497;K7ELW0;K7EN27	Q99497	Protein deglycase DJ-1	PARK7	MMNGGHYTYSENRVEKDGLILTSRGPGTSFE	148	27.0353	22.0618	25.0924	26.9061	26.3434	27.0354	25.7154	27.4831	27.0257	26.2673	26.7137	25.3034	26.7778	27.6581	K	2	___1	1	2.65e-24			0.63336	0.489565	1.00561	1.17269	0.230719
P12882;Q9UKX2	P12882;Q9UKX2	Myosin-1;Myosin-2	MYH1;MYH2	TQQIEELKRQLEEEIKAKNALAHALQSSRHD;TQQIEELKRQLEEEIKAKSALAHALQSSRHD	1330	24.883	21.7858	22.0643	23.5557	18.8986	23.5179	23.5927	24.4886	23.2819	22.7025	24.1355	21.8473	23.1056	23.9808	K	2	___1	1	0.000358572			0.849572	0.426915	0.749171	1.38095	0.230954
P14927;B7Z2R2;P14927-2;E5RHG9	P14927	Cytochrome b-c1 complex subunit 7	UQCRB	NDRMFRIKRALDLNLKHQILPKEQWTKYEEE	72	24.0042	22.78	18.8882	22.9573	24.7091	22.149	20.3264	24.9778	19.7419	22.103	23.7645	25.2761	23.1699	24.2299	K	3	___1	1	5.33e-20			0.595813	0.512814	1.06413	1.12859	0.232262
P07900;P07900-2;P08238;Q58FF7	P07900;P08238	Heat shock protein HSP 90-alpha;Heat shock protein HSP 90-beta;Putative heat shock protein HSP 90-beta-3	HSP90AA1;HSP90AB1;HSP90AB3P	APFDLFENKKKKNNIKLYVRRVFIMDSCDEL;APFDLFENRKKKNNIKLYVRRVFIMDNCEEL	354	20.3793	22.4074	21.5077	21.0123	21.5565	21.435	21.9008	23.0597	19.6072	19.7641	20.2349	18.7011	20.1856	21.8202	K	2	___1	1	0.00563541			0.649701	0.486364	-0.975171	-1.19016	0.232504
P14854;K7EQD3	P14854	Cytochrome c oxidase subunit 6B1	COX6B1	___MAEDMETKIKNYKTAPFDSRFPNQNQTR	13	26.2712	19.5127	25.0426	25.8967	26.0342	25.4855	25.4228	27.3823	24.6311	26.2947	26.7529	23.3911	25.8443	26.8787	K	2	___1	1	0.000118232			0.588906	0.517768	1.07277	1.11992	0.233474
P40939	P40939	Trifunctional enzyme subunit alpha. mitochondrial;Long-chain enoyl-CoA hydratase;Long chain 3-hydroxyacyl-CoA dehydrogenase	HADHA	LEEVAITFAKGLADKKISPKRDKGLVEKLTA	255	18.7713	19.9865	20.9806	21.596	22.5725	24.6899	24.4427	23.197	22.2202	24.0289	22.7476	19.4009	24.7653	24.5023	K	2	___2	1	0.00149973			0.559197	0.53126	1.11753	1.08236	0.237182
A0A087X1N7;P20929-3;P20929-2;P20929-4;P20929	A0A087X1N7	Nebulin	NEB	TKFSSPVDMLGVVLAKKCQELVSDVDYKNYL	2370	19.5563	20.2905	23.6356	24.9663	19.3154	23.1612	24.684	20.6336	20.1757	19.2669	22.9713	18.5247	24.2459	22.9702	K	3	___1	1	2.69e-06			0.638488	0.489138	-0.974428	-1.17517	0.238693
Q16718;F8WAS3;C9IZN5;A0A087X1G1;H7BYD0;Q16718-2	Q16718	NADH dehydrogenase [ubiquinone] 1 alpha subcomplex subunit 5	NDUFA5	KNAAYRKYTEQITNEKLAMVKAEPDVKKLED	55	19.4052	19.3077	20.0501	20.4953	23.216	22.1542	20.1776	21.1777	19.4939	20.9288	22.1177	22.0616	21.8166	22.6729	K	3	___1	1	2.59e-16			0.79407	0.443885	0.780443	1.32794	0.240035
P16615-2;P16615-5;P16615-3;P16615	P16615-2	Sarcoplasmic/endoplasmic reticulum calcium ATPase 2	ATP2A2	AVGDKVPADIRLTSIKSTTLRVDQSILTGES	169	19.1236	19.3351	19.1097	21.5117	22.0225	22.1109	21.537	19.0464	18.1608	19.9522	19.9737	18.4261	22.0352	21.3558	K	2	___1	1	0.00517203			0.741175	0.46205	-0.828614	-1.27813	0.243138
Q92947;Q92947-2	Q92947	Glutaryl-CoA dehydrogenase. mitochondrial	GCDH	WARCEDGCIRGFLLEKGMRGLSAPRIQGKFS	240	18.9049	18.3042	20.4279	20.9886	23.2909	23.4786	21.7974	21.4725	20.3866	24.938	22.4508	19.7957	23.0427	22.9666	K	2	___1	1	0.00569094			0.54594	0.54121	1.12291	1.06375	0.243756
P12883	P12883	Myosin-7	MYH7	VSREGGKVTAETEYGKTVTVKEDQVMQQNPP	67	19.7476	19.2633	19.989	20.309	19.2543	21.7432	20.3334	19.6226	19.8822	19.425	20.5901	22.7839	21.5684	22.6313	K	2	___1	1	1.04e-20			0.716328	0.467364	0.837671	1.24998	0.251161
Q13825;Q13825-2	Q13825	Methylglutaconyl-CoA hydratase. mitochondrial	AUH	ELALACDIRVAASSAKMGLVETKLAIIPGGG	204	25.9064	25.6357	25.0395	25.1864	26.7917	26.9009	26.7218	26.9476	26.4346	26.0641	26.3957	26.5441	26.1689	27.6254	K	3	___1	1	5.45e-81			1.04496	0.394867	0.571143	1.49107	0.253035
Q14315-2;Q14315	Q14315-2	Filamin-C	FLNC	ASIRAPSGNEEPCLLKRLPNRHIGISFTPKE	1961	23.3871	21.7515	21.556	20.0274	18.4776	19.5953	21.1908	22.9648	19.9545	21.8992	22.1236	19.4583	23.0529	22.8252	K	2	___1	1	1.29e-66			0.663316	0.48612	0.898972	1.19556	0.253336
P56181-2	P56181-2	NADH dehydrogenase [ubiquinone] flavoprotein 3. mitochondrial	NDUFV3	QLQASPPGAAEGHLEKPVPEPQRKAAPPLPR	336	21.3573	19.0489	18.5324	19.5807	19.9993	21.0576	18.8173	23.3906	18.4231	22.7121	20.4431	19.3271	20.5216	19.9346	K	4	___1	1	1.98e-57			0.647788	0.489642	0.908386	1.17709	0.257964
P12882;Q9UKX2;Q9Y623	P12882;Q9UKX2;Q9Y623	Myosin-1;Myosin-2;Myosin-4	MYH1;MYH2;MYH4	RVQLLHTQNTSLINTKKKLETDISQIQGEME;RVQLLHTQNTSLINTKKKLETDISQMQGEME	1733	28.1692	25.8288	22.6224	27.4234	27.1985	27.3484	23.8559	28.2612	25.8751	27.7599	27.1426	26.1047	26.9133	28.0087	K	3	___1	1	1.38e-182			0.538793	0.548401	1.08841	1.05025	0.259161
A0A0A0MTS7;Q8WZ42-12;Q8WZ42-13;Q8WZ42-11;Q8WZ42-4;Q8WZ42-7;Q8WZ42-2;Q8WZ42;Q8WZ42-8;Q8WZ42-5;A0A0A0MRA3;Q8WZ42-3;Q8WZ42-10;Q8WZ42-9	A0A0A0MTS7	Titin	TTN	DAVKASQTPGPVVDLKVRSVSKSSCSIGWKK	22459	19.276	20.7395	22.246	22.2757	19.5386	23.5541	19.7678	21.6216	23.7344	20.4901	21.7797	21.2468	22.4028	23.0316	K	2	___1	1	0.000487385			0.592947	0.517739	0.987043	1.1154	0.259858
P15259	P15259	Phosphoglycerate mutase 2	PGAM2	IWRRSFDIPPPPMDEKHPYYNSISKERRYAG	129	28.169	25.1811	24.8077	24.9596	26.4557	25.0017	24.3758	28.6438	24.7403	27.0017	26.5953	25.85	25.243	25.6457	K	3	___1	1	5.64e-17			0.857448	0.431607	0.681314	1.36447	0.2605
O75947;O75947-2;F5H608	O75947	ATP synthase subunit d. mitochondrial	ATP5H	YKANVAKAGLVDDFEKKFNALKVPVPEDKYT	72	27.4843	25.8946	29.958	28.2698	31.347	30.5052	29.7139	28.3829	28.5147	32.0293	29.5281	29.5637	30.6729	30.1155	K	3	___2	1	4.58e-87			0.724176	0.466985	0.8049	1.25192	0.261283
O75947;O75947-2;F5H608	O75947	ATP synthase subunit d. mitochondrial	ATP5H	NPPAIDWAYYKANVAKAGLVDDFEKKFNALK	63	27.4843	25.8946	29.958	28.2698	31.347	30.5052	29.7139	28.3829	28.5147	32.0293	29.5281	29.5637	30.6729	30.1155	K	3	___2	1	3.54e-74			0.724176	0.468009	0.8049	1.25192	0.261283
P00338;P00338-3;P00338-5;P00338-2;F5GXY2;F5GYU2	P00338	L-lactate dehydrogenase A chain	LDHA	GESRLNLVQRNVNIFKFIIPNVVKYSPNCKL	118	20.0364	25.1583	24.4091	19.6936	20.2403	17.6301	19.1748	19.48	19.3488	23.1278	27.0372	19.177	25.729	23.7781	K	2	___1	1	2.56e-29			0.35914	0.675977	1.61933	0.791136	0.26208
P10809	P10809	60 kDa heat shock protein. mitochondrial	HSPD1	IVTKDDAMLLKGKGDKAQIEKRIQEIIEQLD	364	21.1176	20.3235	18.9533	18.5898	19.6282	20.4047	20.8028	18.813	22.0289	19.8878	19.1552	21.6973	21.897	22.0124	K	2	___1	1	0.000387978			0.715823	0.467328	0.810243	1.24308	0.263032
P0DOY3;P0DOY2	P0DOY3			PGAVTVAWKADSSPVKAGVETTTPSKQSNNK	50	19.7862	19.5321	18.863	21.7723	20.4146	20.9536	18.7959	20.2148	20.6476	20.0149	20.6034	21.5648	20.9827	20.6957	K	2	___1	1	2.29e-22			0.876316	0.429138	0.658028	1.37462	0.265069
P12882;Q9UKX2	P12882;Q9UKX2	Myosin-1;Myosin-2	MYH1;MYH2	ASNMETVSKAKGNLEKMCRALEDQLSEIKTK;ASNVETVSKAKGNLEKMCRTLEDQLSELKSK	1253	24.2855	21.1621	20.9311	22.0096	18.2145	19.9195	20.2374	25.2844	18.692	20.5618	22.2624	21.6689	22.341	22.721	K	2	___1	1	0.00396595			0.595042	0.518492	0.9674	1.1157	0.265678
P40926;P40926-2;G3XAL0	P40926	Malate dehydrogenase. mitochondrial;Malate dehydrogenase	MDH2	DPARVNVPVIGGHAGKTIIPLISQCTPKVDF	203	24.1807	19.959	19.7621	21.3824	19.6199	18.855	18.7528	22.4788	19.4159	20.7495	21.1215	22.4558	22.7104	20.2186	K	3	___1	1	1.99e-57			0.606893	0.514312	0.948371	1.12913	0.26573
Q9P2R7-2;Q9P2R7;A0A0U1RQF8;A0A0U1RQU7	Q9P2R7-2	Succinyl-CoA ligase [ADP-forming] subunit beta. mitochondrial	SUCLA2	KGYVAKSPDEAYAIAKKLGSKDVVIKAQVLA	66	25.0848	25.7169	26.464	25.2382	25.6483	27.1892	24.6092	26.813	24.628	27.5013	26.7935	26.4649	26.2484	26.774	K	2	___1	1	9.85e-70			0.763416	0.458966	0.753214	1.28459	0.266063
P09622;E9PEX6;P09622-3;P09622-2	P09622	Dihydrolipoyl dehydrogenase. mitochondrial;Dihydrolipoyl dehydrogenase	DLD	THPEVAWVGKSEEQLKEEGIEYKVGKFPFAA	410	26.7651	25.4701	24.9814	24.9573	26.6744	26.4928	25.2295	28.1286	24.8752	27.1253	26.5075	25.9358	26.3485	26.657	K	2	___1	1	3.82e-109			0.803187	0.447914	0.715328	1.31787	0.266353
O60662;O60662-2;E9PBE3	O60662	Kelch-like protein 41	KLHL41	TDDKKCTNRVFIFNPKKGDWKDLAPMKIPRS	471	19.9346	18.8252	26.3418	27.5932	27.4188	27.5453	26.5257	22.2731	24.5208	20.1105	20.5601	25.7445	24.8238	25.6937	K	2	___1	1	0.00502164			0.383546	0.65247	-1.49401	-0.829687	0.267286
P08670;B0YJC4;A0A1B0GTT5	P08670	Vimentin	VIM	VELQELNDRFANYIDKVRFLEQQNKILLAEL	120	20.2182	20.0619	19.4555	20.7004	21.5212	20.1864	20.0075	22.5145	20.0095	20.7463	21.081	20.0388	21.1815	21.7771	K	2	___1	1	0.0034156			0.768578	0.458694	0.742514	1.28738	0.268732
P12883;P13533	P12883;P13533	Myosin-7;Myosin-6	MYH7;MYH6	LKNAYEESLEHLETFKRENKNLQEEISDLTE	1499	27.1012	19.8198	19.4048	21.66	20.7307	19.6522	18.8955	26.2223	20.5726	20.4693	22.1677	21.6151	19.5243	21.3807	K	3	___1	1	5.86e-44			0.850032	0.43595	0.669685	1.35188	0.269616
P17540	P17540	Creatine kinase S-type. mitochondrial	CKMT2	TALEGLKGDLAGRYYKLSEMTEQDQQRLIDD	209	23.4052	22.4093	22.0856	21.2245	23.3151	23.5068	22.5526	25.2063	22.2895	24.3405	22.3101	22.146	23.1111	24.4201	K	2	___1	1	1.37e-45			0.74789	0.463964	0.760643	1.26863	0.26985
H0YL11;P48735;P48735-2	H0YL11;P48735	Isocitrate dehydrogenase [NADP]. mitochondrial	IDH2	KYKATDFVADRAGTFKMVFTPKDGSGVKEWE;QYKATDFVADRAGTFKMVFTPKDGSGVKEWE	193	31.7408	28.0933	31.2632	31.115	32.0625	32.2052	31.3767	32.2078	29.2127	33.4195	30.7449	31.5038	32.7545	32.3975	K	2	___1	1	2.64e-71			0.905029	0.426299	0.626286	1.38933	0.27114
P12270;P12270-2	P12270	Nucleoprotein TPR	TPR	RSQNTKISTQLDFASKRYEMLQDNVEGYRRE	723	18.9183	18.0306	19.5513	20.3877	20.3083	19.9472	19.0676	19.2145	19.2639	19.3701	20.3566	20.9742	20.0354	20.72	K	2	___1	1	0.00477496			1.06097	0.398814	0.531957	1.47688	0.272652
H7BZ29;Q9HD23-3;Q9HD23-2;Q9HD23;Q9HD23-4	H7BZ29	Magnesium transporter MRS2 homolog. mitochondrial	MRS2	SQATLASVAPVFTVTKFDKQGNVTSFERKKT	42	21.7874	20.4917	23.0335	20.0461	20.5947	24.8302	19.7148	23.1184	20.4067	23.7977	19.8567	22.7887	23.5347	22.5784	K	3	___1	1	8.43e-41			0.707318	0.471864	0.797558	1.22975	0.272818
P12882;Q9UKX2;Q9Y623	P12882;Q9UKX2;Q9Y623	Myosin-1;Myosin-2;Myosin-4	MYH1;MYH2;MYH4	LSRGKQAFTQQIEELKRQLEEEIKAKNALAH;LSRGKQAFTQQIEELKRQLEEEIKAKSALAH;LSRGKQAFTQQIEELKRQLEEETKAKSTLAH	1322	24.2142	23.9884	24.4271	24.6454	23.6163	24.1056	21.8444	24.6476	24.9507	25.1166	25.0572	23.2514	23.8598	24.5367	K	2	___1	1	8.12e-184			0.854691	0.434894	0.654086	1.3503	0.276031
P40926;P40926-2;G3XAL0	P40926	Malate dehydrogenase. mitochondrial;Malate dehydrogenase	MDH2	TYFSTPLLLGKKGIEKNLGIGKVSSFEEKMI	301	30.9352	31.9373	30.8339	31.5814	32.3214	31.8175	30.1235	31.5592	31.5327	31.5432	31.599	32.5772	32.3848	33.0012	K	2	___1	1	2.04e-264			0.835576	0.442534	0.663872	1.33413	0.278795
M0QYT0;M0QXS7;M0R1A2;Q13011;M0R248;M0QZW4	M0QYT0;Q13011	Delta(3.5)-Delta(2.4)-dienoyl-CoA isomerase. mitochondrial	ECH1	AMNKVFWREMVECFNKISRDADCRAVVISGA	95	20.3997	19.3161	20.5889	18.52	20.4465	20.5736	19.6731	20.6393	17.7439	20.9221	20.4185	21.2113	22.8261	20.8996	K	2	___1	1	7.93e-07			0.754918	0.464449	0.7347	1.26932	0.278844
P06744;A0A0A0MTS2;P06744-2;K7EQ48;A0A0J9YXP8;A0A0J9YYH3;A0A0J9YX90	P06744	Glucose-6-phosphate isomerase	GPI	SAVAKHFVALSTNTTKVKEFGIDPQNMFEFW	252	24.4908	20.6828	22.9254	17.8233	22.4476	22.5551	22.3001	24.4977	20.7602	22.1275	23.3273	23.2624	22.7382	23.2499	K	3	___1	1	3.27e-11			0.572762	0.530904	0.962586	1.08454	0.280975
P21796;C9JI87	P21796	Voltage-dependent anion-selective channel protein 1	VDAC1	SANTETTKVTGSLETKYRWTEYGLTFTEKWN	61	19.0406	21.397	20.3051	20.718	20.3292	20.6473	20.3516	21.949	22.3484	20.4047	21.211	18.549	21.2838	22.7555	K	2	___1	1	5.06e-05			0.674583	0.485667	0.816086	1.19369	0.281503
P04406;P04406-2;E7EUT5	P04406	Glyceraldehyde-3-phosphate dehydrogenase	GAPDH	GYSNRVVDLMAHMASKE______________	334	29.5508	27.0685	29.5366	30.8195	29.6231	30.3075	30.0054	30.0034	26.8323	29.3481	30.037	27.7828	29.1709	29.8631	K	2	___1	1	4.94e-11			0.990317	0.417433	-0.5534	-1.42936	0.283112
P12882;Q9UKX2;Q9Y623	P12882;Q9UKX2;Q9Y623	Myosin-1;Myosin-2;Myosin-4	MYH1;MYH2;MYH4	LDDLQAEEDKVNTLTKAKIKLEQQVDDLEGS;LDDLQMEEDKVNTLTKAKTKLEQQVDDLEGS	NaN	25.1561	22.9767	22.3959	24.2331	21.601	23.4586	18.6787	23.5397	23.7392	22.7228	23.1742	24.4777	23.9109	24.3304	K	2	___1	1	0.00377289			0.517758	0.562797	1.0564	1.01675	0.283818
Q5BKX8	Q5BKX8	Muscle-related coiled-coil protein	MURC	RKVSAHIKDVKARVEKQQIHVKKVEVKQEEI	109	21.5581	19.4958	18.5356	19.8165	20.2359	20.5492	18.844	21.7873	19.5692	20.8077	19.6739	20.8909	20.1565	20.7048	K	3	___1	1	0.00452356			0.840117	0.441714	0.650743	1.33354	0.283988
P40926;P40926-2;G3XAL0	P40926	Malate dehydrogenase. mitochondrial;Malate dehydrogenase	MDH2	QETECTYFSTPLLLGKKGIEKNLGIGKVSSF	296	26.6802	25.064	25.2874	25.7237	26.5587	27.0272	23.525	26.5795	25.1497	28.5887	27.0679	23.5716	28.1558	28.0881	K	3	___1	1	1.98e-265			0.521087	0.563131	1.04787	1.02079	0.284425
Q9Y4W6	Q9Y4W6	AFG3-like protein 2	AFG3L2	LINDAYKRTVALLTEKKADVEKVALLLLEKE	719	19.3965	21.1886	21.5963	20.8545	21.8718	21.3182	20.0466	22.4957	20.0011	21.8729	22.2137	21.9271	21.4453	21.6689	K	2	___1	1	0.00290342			0.711679	0.473418	0.7646	1.22685	0.285661
P54296;E7EWH9;A0A0J9YVV7	P54296	Myomesin-2	MYOM2	AFAEFQQFKAAAFAEKNRGRLIGGLPDVVTI	1341	23.7152	21.3128	19.5032	24.4753	23.3794	24.1742	24.0789	18.308	23.0467	21.8782	23.4565	22.3991	20.4993	23.2516	K	2	___1	1	0.00177528			0.488151	0.587068	-1.11423	-0.977832	0.285817
A0A1W2PQV2;H3BUH9;P23434	A0A1W2PQV2	Glycine cleavage system H protein. mitochondrial	GCSH	NPSELDELMSEEAYEKYIKSIEE________	93	19.9019	20.3934	19.7137	20.1864	21.363	19.7838	19.1077	21.7512	19.6104	25.2423	17.6359	23.4887	22.064	18.3327	K	3	___1	1	8.02e-58			0.494624	0.58	1.09647	0.986117	0.286853
P12883	P12883	Myosin-7	MYH7	LDDLQAEEDKVNTLTKAKVKLEQQVDDLEGS	1022	25.1561	22.9767	22.3959	24.2331	21.601	23.4586	18.7566	23.5397	23.7392	22.7228	23.1742	24.4777	23.9109	24.3304	K	2	___1	1	0.00377289			0.517191	0.56253	1.04527	1.01488	0.288002
Q02252-2;Q02252	Q02252-2	Methylmalonate-semialdehyde dehydrogenase [acylating]. mitochondrial	ALDH6A1	SFSSSVPTVKLFIGGKFVESKSDKWIDIHNP	47	20.2769	25.9884	25.4245	26.1157	26.5502	26.9595	26.383	23.7322	25.9398	26.1757	27.0781	26.5197	27.2713	26.0773	K	2	___1	1	0.000532843			0.733571	0.466624	0.727986	1.24263	0.292395
Q9UBY9;Q8N241;Q68DG0;Q9UBY9-2	Q9UBY9	Heat shock protein beta-7	HSPB7;DKFZp779D0968	IIVTTSNNHIEVRAEKLAADGTVMNTFAHKC	111	23.5548	24.3882	22.9228	24.0129	25.7042	23.3851	22.7749	25.4064	22.4516	24.1957	25.5919	25.2096	24.143	25.3789	K	3	___1	1	2.58e-57			0.661972	0.489871	0.804886	1.17558	0.293216
P35609;P35609-2;F6THM6	P35609	Alpha-actinin-2	ACTN2	WIRRTIPWLENRTPEKTMQAMQKKLEDFRDY	311	25.8381	23.7948	23.7116	25.0455	23.5272	24.5756	23.7001	26.2106	19.1123	21.9734	23.843	24.0516	24.2696	24.4237	K	2	___1	1	1.29e-26			0.5902	0.527536	-0.901243	-1.09984	0.293823
P25705;P25705-2;P25705-3	P25705	ATP synthase subunit alpha. mitochondrial	ATP5A1	EQVAVIYAGVRGYLDKLEPSKITKFENAFLS	498	22.6345	19.1825	20.8013	19.1557	19.4872	21.1218	19.6396	23.394	24.7729	19.8755	21.2651	18.9761	18.1052	23.6208	K	2	___1	1	0.00322375			0.456004	0.610599	1.141	0.930804	0.301786
P31948;P31948-3;P31948-2	P31948	Stress-induced-phosphoprotein 1	STIP1	PQALSEHLKNPVIAQKIQKLMDVGLIAIR__	530	20.4976	21.7871	20.0164	20.7258	20.9777	19.7343	20.3136	20.9855	20.4729	20.2674	21.5027	22.3056	21.3041	21.5385	K	2	___1	1	0.00448499			0.840896	0.447294	0.617743	1.3199	0.302372
P13929;P13929-2;E5RGZ4;K7EKN2;K7EPM1;E5RI09;E5RG95	P13929	Beta-enolase;Enolase	ENO3	LLQKKLSVVDQEKVDKFMIELDGTENKSKFG	92	26.2365	25.7558	26.8517	27.8105	28.0673	27.9703	26.2524	26.8546	26.8688	28.3755	28.3277	27.2425	27.5362	28.0233	K	2	___1	1	1.13e-67			0.840021	0.447185	0.612014	1.31637	0.306122
Q16795	Q16795	NADH dehydrogenase [ubiquinone] 1 alpha subcomplex subunit 9. mitochondrial	NDUFA9	IKSSSRYLRNKAVGEKVVRDAFPEAIIVKPS	189	28.385	19.7744	26.9741	27.1937	27.8234	28.875	28.588	29.071	27.2731	28.2626	27.5971	27.3183	28.1914	27.714	K	2	___1	1	0.00115264			0.454186	0.61318	1.11627	0.926326	0.311175
C9JZN9;P45378-4;H9KVA2;F8WA37;P45378-5;P45378-7;P45378-6;P45378-2;P45378-3;P45378;C9JCA5	C9JZN9;H9KVA2	Troponin T. fast skeletal muscle	TNNT3	PKIPEGEKVDFDDIQKKRQNKDLMELQALID	42	26.8477	23.0483	23.6907	24.6862	24.7843	23.2284	23.685	27.006	21.9889	23.0397	23.9032	23.4716	23.025	24.1241	K	2	___1	1	0.00278161			1.03817	0.414848	-0.487443	-1.42145	0.311853
P06732	P06732	Creatine kinase M-type;Creatine kinase M-type. N-terminally processed	CKM	_MPFGNTHNKFKLNYKPEEEYPDLSKHNNHM	15	23.7561	22.2164	22.158	24.2145	24.093	23.5763	22.034	23.57	24.0423	23.7764	24.057	23.5106	23.1936	25.1687	K	2	___1	1	0.000308119			0.668653	0.48902	0.752899	1.172	0.313742
P42765;A0A0B4J2A4;K7EME0;K7EJ68	P42765	3-ketoacyl-CoA thiolase. mitochondrial	ACAA2	MSQAPYCVRNVRFGTKLGSDIKLEDSLWVSL	137	32.3101	32.3957	31.5859	31.7106	32.794	32.9479	29.2646	33.0485	31.3105	32.4935	32.4028	32.6588	33.3856	33.1711	K	2	___1	1	3.66e-05			0.640806	0.50293	0.780286	1.14384	0.316219
Q8IWW8-2;Q8IWW8;Q8IWW8-4;Q8IWW8-3;B4DV11;B4DFI7;E5RFL4	Q8IWW8-2	Hydroxyacid-oxoacid transhydrogenase. mitochondrial	ADHFE1	MGAKNVCLMTDKNLSKLPPVQVAMDSLVKNG	38	19.2282	19.178	20.3364	21.1378	23.4941	18.9903	19.9981	21.2218	20.3011	22.226	19.8687	23.1745	21.3415	19.4728	K	2	___1	1	1.59e-06			0.663259	0.492466	0.749071	1.16449	0.318546
P30038;P30038-2;P30038-3;Q5TF55	P30038	Delta-1-pyrroline-5-carboxylate dehydrogenase. mitochondrial	ALDH4A1	AADMLSGPRRAEILAKTMVGQGKTVIQAEID	146	21.0672	22.0905	18.7675	21.0455	19.1715	18.7882	21.4642	20.4836	20.2622	21.2653	20.7799	21.9907	22.2454	21.6606	K	2	___1	1	1.51e-11			0.550184	0.550036	0.899015	1.04509	0.320167
Q9Y2Z9-3;Q9Y2Z9;G3V2L5;G3V4A6;G3V434	Q9Y2Z9-3	Ubiquinone biosynthesis monooxygenase COQ6. mitochondrial	COQ6	KKILLLEAGPKKVLEKLSETYSNRVSSISPG	53	20.6261	19.3092	20.0347	19.5038	19.3421	18.4462	20.23	22.512	19.6075	21.251	17.3183	20.603	20.5824	20.8592	K	2	___1	1	0.000583879			0.658716	0.492063	0.748757	1.15886	0.321205
Q13423;E9PCX7	Q13423	NAD(P) transhydrogenase. mitochondrial	NNT	RMATQASTLYSNNITKLLKAISPDKDNFYFD	394	27.2895	26.2533	28.0303	26.8595	28.2781	27.9248	25.9336	28.1195	25.7723	30.0607	26.6653	27.4636	28.8948	28.4932	K	2	___1	1	1.29e-246			0.704286	0.48805	0.700043	1.20036	0.321343
P52179;P52179-2;A8MX12	P52179	Myomesin-1	MYOM1	AGTENWQRVNTELPVKSPRFALFDLAEGKSY	693	20.8361	20.9204	20.295	21.9422	21.2204	19.1128	22.0588	20.6788	21.8505	19.1599	19.4409	20.4308	17.383	22.6454	K	2	___1	1	0.00160204			0.717614	0.482383	-0.6852	-1.21128	0.322323
P09104-2;P09104;F5H0C8;P13929;P13929-2;P13929-3	P09104-2;P13929	Gamma-enolase;Enolase;Beta-enolase	ENO2;ENO3	GQIKTGAPCRSERLAKYNQLMRIEEALGDKA;GQIKTGAPCRSERLAKYNQLMRIEEELGDEA	406	29.3984	24.8124	28.0892	28.6756	29.0104	28.5031	26.9315	30.0932	26.1389	28.3947	29.4822	27.9317	28.7151	28.7763	K	2	___1	1	0.000171761			0.836953	0.455429	0.587357	1.30149	0.322411
P17661	P17661	Desmin	DES	VELQELNDRFANYIEKVRFLEQQNAALAAEV	125	25.5855	19.8844	23.4171	24.6249	24.0086	23.9703	23.5385	25.673	19.8867	24.7972	25.3867	23.1177	25.0794	25.0366	K	2	___1	1	0.000388369			0.863677	0.446553	0.563999	1.31602	0.325752
P06732	P06732	Creatine kinase M-type;Creatine kinase M-type. N-terminally processed	CKM	EDHLRVISMEKGGNMKEVFRRFCVGLQKIEE	247	23.7289	24.5871	24.3014	24.9538	24.4332	24.743	21.8603	25.4141	24.5215	23.2256	25.4225	24.8067	25.0124	25.607	K	2	___1	1	0.00122877			0.630448	0.513354	0.771729	1.12901	0.326186
Q13423;E9PCX7	Q13423	NAD(P) transhydrogenase. mitochondrial	NNT	MLLGDAKKTCDALQAKVRESYQK________	1079	21.1525	20.5107	21.1129	18.2701	20.6057	21.8808	19.9716	20.8694	20.7017	22.0659	21.282	21.8129	21.3086	20.1668	K	2	___1	1	6.23e-05			0.71748	0.483314	0.671857	1.20689	0.329576
S4R371;P05413;S4R3A2	S4R371	Fatty acid-binding protein. heart	FABP3	TRQVASMTKPTTIIEKNGDILTLKTHSTFKN	45	24.8105	19.0055	19.9458	25.549	25.5056	25.2192	25.9317	25.0574	22.9011	26.7307	25.9138	22.1026	25.703	25.6555	K	3	___1	1	1.42e-62			0.414912	0.637128	1.15669	0.867243	0.33119
A0A0A0MTS7;Q8WZ42-12;Q8WZ42-13;Q8WZ42-11;Q8WZ42-4;Q8WZ42-7;Q8WZ42-2;Q8WZ42;Q8WZ42-8;Q8WZ42-5;A0A0A0MRA3;Q8WZ42-3;Q8WZ42-10;Q8WZ42-9	A0A0A0MTS7	Titin	TTN	FVRFSKTENKITLSIKNAKKEHGGKYTVILD	30192	21.6552	19.6949	21.9608	22.8149	20.7509	24.6209	23.9965	22.5253	19.8492	22.1103	21.2707	19.0186	23.3268	23.1859	K	2	___1	1	0.000362208			0.788765	0.465395	-0.601043	-1.2582	0.335675
Q14118	Q14118	Dystroglycan;Alpha-dystroglycan;Beta-dystroglycan	DAG1	HRRPQGDRAPARFKAKFVGDPALVLNDIHKK	611	19.8123	20.983	19.2603	23.208	23.0477	19.9883	20.8183	24.8388	18.9504	24.096	23.6569	18.5495	22.7684	22.6402	K	3	___1	1	5.42e-06			0.395317	0.650127	1.19747	0.837742	0.336216
P16219;E9PE82	P16219	Short-chain specific acyl-CoA dehydrogenase. mitochondrial	ACADS	AAQVDKEHLFPAAQVKKMGGLGLLAMDVPEE	72	22.297	22.0418	21.9823	20.4334	24.4059	24.0319	22.7674	24.3246	22.9659	23.9964	21.6922	21.3578	24.6582	24.7656	K	2	___1	1	4.26e-08			0.569771	0.540627	0.828714	1.06117	0.337149
P28331;P28331-2;P28331-4;B4DJ81;P28331-3;P28331-5	P28331	NADH-ubiquinone oxidoreductase 75 kDa subunit. mitochondrial	NDUFS1	NDRSRFLEGKRAVEDKNIGPLVKTIMTRCIQ	163	20.624	19.1051	19.615	21.2624	19.7672	21.9799	20.7461	21.0026	22.4683	19.075	21.4008	19.7844	21.5513	23.0429	K	2	___1	1	3.9e-05			0.632154	0.51444	0.746514	1.12558	0.337356
P13073;H3BN72;H3BNV9;H3BPG0	P13073	Cytochrome c oxidase subunit 4 isoform 1. mitochondrial	COX4I1	SLSMDEKVELYRIKFKESFAEMNRGSNEWKT	87	19.4848	19.1438	20.7247	20.2325	22.1444	22.5764	20.5685	20.1336	20.2426	25.3186	21.3028	18.4078	23.8366	22.4824	K	2	___2	1	2.06e-06			0.47671	0.605983	0.978471	0.949224	0.341627
A0A0A0MTS7;Q8WZ42-12;Q8WZ42-13;Q8WZ42-11;Q8WZ42-4;Q8WZ42-7;Q8WZ42-2;Q8WZ42;Q8WZ42-8;Q8WZ42-5;A0A0A0MRA3;Q8WZ42-3;Q8WZ42-10;Q8WZ42-9	A0A0A0MTS7	Titin	TTN	SSGSKSATIKLKVLDKPGPPASVKINKMYSD	21956	24.946	18.3663	22.2631	22.0855	18.4279	22.8356	22.785	27.5183	21.6323	26.5586	19.0791	20.1519	22.1873	21.7086	K	2	___1	1	0.00521164			0.458074	0.613105	1.0181	0.924858	0.341692
P12883	P12883	Myosin-7	MYH7	NWPWMKLYFKIKPLLKSAEREKEMASMKEEF	841	20.3011	19.6609	21.6976	22.6284	20.825	21.7574	18.8378	19.8132	23.6865	19.5396	20.9219	22.7589	22.7434	23.3598	K	2	___1	1	0.0040825			0.458013	0.612381	1.01644	0.924628	0.342339
P16615-2;P16615-5;P16615-3;P16615;P16615-4;H7C5W9	P16615-2	Sarcoplasmic/endoplasmic reticulum calcium ATPase 2	ATP2A2	SVYCTPNKPSRTSMSKMFVKGAPEGVIDRCT	510	22.5712	22.1564	22.7954	23.8874	23.5048	23.1453	24.3189	23.4166	21.6626	22.3373	22.5293	20.8137	23.3113	23.8516	K	2	___1	1	0.000432404			0.728981	0.484546	-0.636714	-1.20786	0.343437
H7BY37;Q8NEZ4-2;Q8NEZ4;Q8NEZ4-3	H7BY37	Histone-lysine N-methyltransferase 2C	KMT2C	PKKKEQENKTLVLSDKHSPQKKSTVTNEVKT	315	22.8602	19.8897	22.3956	23.8598	21.1762	23.3059	22.8176	23.9875	21.0039	21.7289	23.4645	23.9546	23.5003	23.1555	K	3	___2	1	7.66e-05			0.71106	0.485682	0.641457	1.18949	0.349853
P49411	P49411	Elongation factor Tu. mitochondrial	TUFM	LTAAITKILAEGGGAKFKKYEEIDNAPEERA	88	24.1961	21.4549	24.5942	24.6828	25.9251	20.3639	20.4413	25.455	18.4313	23.7361	25.2628	25.5929	17.7135	20.1541	K	2	___1	1	0.00194939			0.600467	0.529786	-0.758943	-1.08837	0.350171
Q14315-2;Q14315	Q14315-2	Filamin-C	FLNC	PTEPGTYIINIKFADKHVPGSPFTVKVTGEG	2084	24.674	19.326	19.2286	21.4284	19.7642	22.1858	20.0856	24.7611	19.2276	21.6194	22.9167	19.2743	21.0939	23.0223	K	3	___1	1	5.7e-05			0.610115	0.528112	0.7461	1.09789	0.350585
P14621;U3KQL2;U3KPX8	P14621	Acylphosphatase-2	ACYP2	TSKGTVTGQVQGPEDKVNSMKSWLSKVGSPS	58	18.5224	17.1959	19.1335	22.0897	21.3908	20.4875	20.1212	19.4135	20.051	19.4845	22.177	20.9126	19.7489	21.8425	K	2	___1	1	3.87e-23			0.673196	0.493393	0.669857	1.15513	0.354042
P06732	P06732	Creatine kinase M-type;Creatine kinase M-type. N-terminally processed	CKM	_____MPFGNTHNKFKLNYKPEEEYPDLSKH	11	28.4191	23.8606	21.0356	24.6217	25.717	21.8326	19.578	29.0653	23.7238	24.065	23.3469	24.2049	22.5658	24.7294	K	2	___1	1	1.23e-35			0.475489	0.60563	0.948072	0.944485	0.354162
P22695;H3BRG4;H3BSJ9;H3BP04;H3BUE4;H3BUI9;A0A087WVZ4	P22695	Cytochrome b-c1 complex subunit 2. mitochondrial	UQCRC2	LRLTSSLTTKGASSFKITRGIEAVGGKLSVT	98	22.4929	23.2554	22.5587	22.0543	22.8541	23.3988	18.5672	24.388	22.1763	24.8097	22.5842	23.27	22.0352	21.2178	K	2	___1	1	0.00506008			0.594752	0.531824	0.757114	1.0807	0.354572
A0A087X1N7;P20929-3;P20929-2;P20929-4;P20929;H0Y786	A0A087X1N7	Nebulin	NEB	EVVLAKSNAENISIPKYREVWDKDKTSIHIM	5638	18.7607	19.4714	20.2644	21.1624	20.9193	22.4549	21.5227	20.2795	19.8339	18.7868	20.1951	17.6516	21.1885	21.4468	K	2	___1	1	5.58e-12			0.605421	0.531725	-0.739086	-1.09045	0.356897
A0A087X1N7;P20929-3;P20929-2;P20929-4;P20929	A0A087X1N7	Nebulin	NEB	LEMEKAKRASDILNEKKYRQHPDTLKFTSIE	982	20.0182	20.0726	21.1877	22.0747	21.3555	22.4113	18.8076	23.1491	21.7485	19.3623	22.241	21.1792	22.338	21.5084	K	2	___1	1	0.00207519			0.557108	0.552212	0.799843	1.03949	0.358427
P00367;P00367-2;P00367-3	P00367	Glutamate dehydrogenase 1. mitochondrial	GLUD1	VPTAEFQDRISGASEKDIVHSGLAYTMERSA	503	22.6939	19.5731	19.9085	20.9256	21.875	18.6752	20.0613	22.6928	18.9481	21.9515	20.7573	21.4537	20.3685	22.0581	K	3	___1	1	5.52e-06			0.685692	0.493696	0.645343	1.16199	0.360989
P14927	P14927	Cytochrome b-c1 complex subunit 7	UQCRB	WTKYEEENFYLEPYLKEVIRERKEREEWAKK	96	22.0045	19.9876	19.4343	21.1375	19.3203	19.4515	19.963	21.0102	18.5708	24.3896	23.8804	22.4542	18.9771	18.8467	K	2	___1	1	7.13e-107			0.45061	0.616971	0.975758	0.91	0.363341
P10809	P10809	60 kDa heat shock protein. mitochondrial	HSPD1	AVLKVGGTSDVEVNEKKDRVTDALNATRAAV	417	23.0811	20.3608	21.6126	21.9909	21.805	23.1935	22.2353	24.8539	21.2	22.3993	23.1617	22.0695	22.0629	22.4122	K	2	___1	1	4.64e-80			0.79168	0.467212	0.554329	1.23934	0.36404
P14618;P14618-3;B4DNK4;P30613-2;P30613;P14618-2;H3BTN5;H3BR70	P14618;P14618-2	Pyruvate kinase PKM;Pyruvate kinase;Pyruvate kinase PKLR	PKM;PKLR	DLGIEIPAEKVFLAQKMMIGRCNRAGKPVIC	311	22.7523	21.4607	23.6823	24.3313	24.6431	25.3109	24.312	22.9954	23.0874	24.3067	25.5272	23.5337	25.4227	25.4831	K	2	___1	1	5.47e-05			0.793031	0.467854	0.551943	1.2395	0.364999
P25705;P25705-2;P25705-3	P25705	ATP synthase subunit alpha. mitochondrial	ATP5A1	GTIRADGKISEQSDAKLKEIVTNFLAGFEA_	539	30.1598	27.3154	28.8645	28.2637	28.9442	29.7404	29.167	30.8529	28.7278	30.5814	29.0554	27.6687	29.7645	29.8227	K	2	___1	1	1.75e-22			0.761035	0.479264	0.574057	1.21719	0.365698
A0A0G2JIW1;P0DMV9;P0DMV8;P0DMV8-2;V9GZ37	A0A0G2JIW1	Heat shock 70 kDa protein 1B;Heat shock 70 kDa protein 1A	HSPA1B;HSPA1A	EDFDNRLVNHFVEEFKRKHKKDISQNKRAVR	247	23.8781	21.9478	20.7598	21.8253	22.3174	20.1698	19.0743	25.4147	19.6033	18.8859	21.0213	19.4153	21.1064	19.1377	K	3	___1	1	2.18e-09			0.562218	0.552668	-0.7697	-1.04095	0.369199
Q9H900	Q9H900	Protein zwilch homolog	ZWILCH	RLNCAAEDFYSRLLQKFNEEKKGIRKDPFLY	19	24.1674	21.9629	18.8352	22.462	21.8085	22.9021	22.0768	24.1418	24.031	25.1197	23.7604	23.8258	18.437	22.5297	K	2	___1	1	0.00691683			0.395929	0.652478	1.09007	0.832991	0.370177
Q9NR12-2	Q9NR12-2	PDZ and LIM domain protein 7	PDLIM7	AQPVQSKPQKVQTPDKQPLRPLVPDASKQRL	99	21.0128	20.1536	18.5875	21.857	21.7114	19.8372	19.6019	23.1924	20.5024	20.9563	21.0738	21.5069	19.0299	21.2872	K	3	___1	1	0.000847257			0.626269	0.525805	0.683929	1.10313	0.372972
P35914-3;P35914-2;P35914	P35914-3	Hydroxymethylglutaryl-CoA lyase. mitochondrial	HMGCL	VKIVEVGPRDGLQNEKNIVSTPVKIKLIDML	48	22.8483	19.6286	22.7799	23.0935	23.7593	24.6764	21.9055	23.9093	23.9221	24.5442	23.9463	19.9841	23.853	25.4828	K	2	___1	1	1.89e-134			0.431074	0.629713	0.9929	0.881669	0.373238
Q9UMS6-5;Q9UMS6;Q9UMS6-3;Q9UMS6-4;Q9UMS6-2;H0Y9Y3	Q9UMS6-5	Synaptopodin-2	SYNPO2	RISVPAKRTGILQEAKRRSTTKPMFTFKEPK	293	23.1263	19.6928	23.7643	23.8709	24.0174	23.6993	23.1494	20.5378	21.9616	21.8333	22.7068	21.8981	23.7186	23.2939	K	2	___1	1	0.00268033			0.556979	0.555092	-0.767186	-1.0336	0.373846
B4DP64;E5RGR0;O75608-2;O75608;A0A087X1K9;E5RJ48;E5RI35	B4DP64	Acyl-protein thioesterase 1	LYPLA1	KQAAENIKALIDQEVKNGIPSNRIILGGFSQ	105	19.2837	20.063	19.9867	20.4396	21.7269	21.9144	18.8781	19.7585	21.1234	21.4379	20.5185	20.9361	21.3025	21.877	K	2	___1	1	5.71e-25			0.641436	0.51877	0.665928	1.1165	0.373981
P02144;Q8WVH6	P02144	Myoglobin	MB	NKALELFRKDMASNYKELGFQG_________	148	23.3399	23.7854	23.5359	26.364	25.9649	25.8341	24.5614	24.0701	24.6073	25.3068	25.9971	23.226	24.1148	19.6631	K	2	___1	1	8.21e-11			0.465212	0.612738	-0.914343	-0.925959	0.375523
A2A274;Q99798	A2A274	Aconitate hydratase. mitochondrial	ACO2	ACGPCIGQWDRKDIKKGEKNTIVTSYNRNFT	487	23.6788	18.2117	19.0653	18.7561	20.0606	22.7825	20.3381	24.6754	19.4862	21.0889	21.9339	17.5411	21.962	21.8972	K	3	___1	0.771393	0.000413014			0.522159	0.574226	0.813086	0.994334	0.376219
A0A286YFB1;C9JZN9;P45378-4;H9KVA2;F8WA37;P45378-5;P45378-7;P45378-6;P45378-2;P45378-3;P45378;C9JCA5;P13805-2;P13805-3;P13805;K7EQL4;Q3B759;M0QZU8;M0QZY5;M0QX01	A0A286YFB1;C9JZN9;H9KVA2;P13805-2	Troponin T. fast skeletal muscle;Troponin T. slow skeletal muscle	TNNT3;TNNT1	HFEARKKEEEELVALKERIEKRRAERAEQQR;HFEQRKKEEEELVALKERIERRRSERAEQQR	74	23.5191	20.6566	20.2622	22.7198	22.2989	21.348	18.4069	23.7086	21.7921	20.7921	22.9462	21.3915	20.9225	23.4855	K	2	___1	1	1.71e-07			0.50958	0.585901	0.832429	0.979724	0.37654
P16233	P16233	Pancreatic triacylglycerol lipase	PNLIP	YNNVINPTLPRVGASKIIVETNVGKQFNFCS	435	21.0387	21.3407	21.941	22.986	20.6661	23.6771	20.4286	20.5089	19.1277	24.1503	22.4892	19.2532	20.0245	20.8645	K	2	___1	1	0.00656931			0.524212	0.572624	-0.808557	-0.996465	0.376829
H7C3D3;H0Y2Y8;Q15942-2;Q15942	H7C3D3	Zyxin	ZYX	ASSPAPAPKFSPVTPKFTPVASKFSPGAPGG	89	20.769	22.3986	20.4565	18.8042	22.8295	19.4597	21.5787	20.9776	19.7564	19.7541	22.921	22.9116	23.0183	23.4178	K	2	___1	1	0.000487385			0.458205	0.615419	0.922943	0.916471	0.377661
P43155-2;P43155;P43155-3	P43155-2	Carnitine O-acetyltransferase	CRAT	SNHRNSWAKAYNTLIKDKVNRDSVRSIQKSI	247	22.9505	22.6863	23.776	22.4864	25.1477	25.0375	24.3607	24.4455	23.0531	25.7105	23.4451	24.2083	25.2251	24.3001	K	3	___2	1	2.09e-37			0.749117	0.487475	0.563229	1.19985	0.378509
P43155-2;P43155;P43155-3	P43155-2	Carnitine O-acetyltransferase	CRAT	HRNSWAKAYNTLIKDKVNRDSVRSIQKSIFT	249	22.9505	22.6863	23.776	22.4864	25.1477	25.0375	24.3607	24.4455	23.0531	25.7105	23.4451	24.2083	25.2251	24.3001	K	3	___2	1	2.09e-37			0.749117	0.486462	0.563229	1.19985	0.378509
Q05639	Q05639	Elongation factor 1-alpha 2	EEF1A2	EKIDRRSGKKLEDNPKSLKSGDAAIVEMVPG	392	20.1481	18.9693	21.1336	20.9456	19.6749	20.7496	20.2072	20.1402	20.544	22.4308	20.6031	19.2049	20.7867	22.0442	K	2	___1	1	0.000635836			0.749694	0.485801	0.5608	1.19934	0.379814
P07195	P07195	L-lactate dehydrogenase B chain	LDHB	SVINQKLKDDEVAQLKKSADTLWDIQKDLKD	318	21.957	22.3609	19.9202	21.3346	20.0241	21.8377	19.9196	24.4347	20.8421	19.5464	20.3707	19.548	18.3038	18.8439	K	2	___1	1	3.19e-09			0.535717	0.56746	-0.780643	-1.00763	0.381766
P11142;E9PKE3;E9PNE6;A8K7Q2;E9PS65;E9PM13	P11142	Heat shock cognate 71 kDa protein	HSPA8	CNEIINWLDKNQTAEKEEFEHQQKELEKVCN	589	24.1108	21.7953	18.629	23.3266	22.8054	23.3465	18.4746	25.0881	18.685	19.579	20.3822	20.4836	21.4143	20.7308	K	3	___1	1	1.33e-06			0.477168	0.606079	-0.875028	-0.939123	0.382353
P43155-2;P43155;P43155-3;H0Y4Z7	P43155-2	Carnitine O-acetyltransferase	CRAT	SCAETNAARLAHYLEKALLDMRALLQSHPRA	588	28.8982	24.4408	25.5088	24.9	26.7762	26.6538	25.2098	29.4595	23.6569	28.4015	26.7852	25.3563	27.1909	26.4707	K	3	___1	1	3.85e-10			0.590872	0.541394	0.704772	1.0645	0.383328
P12883	P12883	Myosin-7	MYH7	DLKLTQESIMDLENDKQQLDERLKKKDFELN	1073	23.332	19.3378	20.0618	19.1847	20.0571	21.8684	19.2743	22.9235	19.9234	19.6786	22.5736	23.2414	18.6602	22.6954	K	3	___1	1	2.65e-34			0.441603	0.625987	0.94	0.893244	0.384497
P21817-3;P21817-2;P21817;M0R014	P21817-3	Ryanodine receptor 1	RYR1	PYDTLTAKEKARDREKAQELLKFLQMNGYAV	2922	19.2181	20.5411	19.2469	21.1715	21.9683	22.649	20.9104	23.3839	22.8113	21.5244	22.0938	21.9948	17.9228	22.9741	K	2	___1	1	0.000889016			0.413022	0.643205	0.999972	0.854218	0.386358
P21912;A0A087WWT1	P21912	Succinate dehydrogenase [ubiquinone] iron-sulfur subunit. mitochondrial	SDHB	KKFAIYRWDPDKAGDKPHMQTYEVDLNKCGP	55	27.6697	22.4323	24.0615	23.1091	24.8655	25.1178	24.546	27.8583	24.6962	26.255	25.3344	22.7376	24.8555	25.2508	K	3	___1	1	5.07e-22			0.556543	0.558404	0.740842	1.0281	0.386981
A0A0B4J2D5;A0A096LPI6;P30042;A0A096LNH5;H7C2G3;H7C1F6;A0A0B4J2H4;P30042-2	A0A0B4J2D5	ES1 protein homolog. mitochondrial	C21orf33	AKHCVKEVVEAHVDQKNKVVTTPAFMCETAL	233	24.7083	19.9493	22.2845	23.4506	23.8725	24.8216	23.5115	25.1171	24.4306	23.2516	22.2003	25.5729	23.6782	24.0288	K	2	___1	1	3.74e-208			0.507296	0.590282	0.8116	0.973607	0.387506
P11055;P12882;P12883;P13533;Q9UKX2;Q9UKX3;Q9Y623	P11055;P12882;P12883;P13533;Q9UKX2;Q9UKX3;Q9Y623	Myosin-3;Myosin-1;Myosin-7;Myosin-6;Myosin-2;Myosin-13;Myosin-4	MYH3;MYH1;MYH7;MYH6;MYH2;MYH13;MYH4	YETDAIQRTEELEEAKKKLAQRLQAAEEHVE;YETDAIQRTEELEEAKKKLAQRLQDAEEAVE;YETDAIQRTEELEEAKKKLAQRLQDAEEHVE;YETDAIQRTEELEEAKKKLAQRLQDSEEQVE;YETDAIQRTEELEEAKKKLAQRLQEAEEAVE;YETDAIQRTEELEEAKKKLAQRLQEAEENTE	1390	28.6014	26.689	26.9604	27.6865	26.1632	27.3777	26.8559	28.2429	26.1002	26.2434	26.3683	26.8937	26.7407	26.6845	K	2	___1	1	0.000311575			0.941046	0.455488	-0.4372	-1.2976	0.387771
Q96A32;H3BPK4;H3BN54;H3BML9	Q96A32	Myosin regulatory light chain 2. skeletal muscle isoform	MYLPF	EAFTVIDQNRDGIIDKEDLRDTFAAMGRLNV	47	19.9682	23.4975	23.4463	25.4692	24.7887	23.6449	23.29	25.5334	24.3553	23.5183	24.4124	24.5398	22.9492	24.9682	K	3	___1	1	2.27e-26			0.465281	0.613151	0.881686	0.9226	0.388838
P07951;Q5TCU3;Q5TCU8;U3KQK2	P07951;Q5TCU3	Tropomyosin beta chain	TPM2	CGDLEEELKIVTNNLKSLEAQADKYSTKEDK	205	26.6303	24.1674	25.5102	28.3066	27.2083	28.2663	27.4845	27.1459	27.4864	26.669	27.0918	28.5078	27.1303	28.5556	K	2	___1	1	1.43e-101			0.567592	0.553371	0.716171	1.03744	0.392199
A0A0C4DFM5;Q9UBF9;B4DT68;Q9UBF9-2	A0A0C4DFM5	Myotilin	MYOT	SWYLNGRTVQSDDLHKMIVSEKGLHSLIFEV	297	20.8608	18.3403	19.671	20.4757	22.3565	23.3022	22.7041	21.9345	20.6731	20.353	21.4565	22.29	22.1629	22.9327	K	3	___1	1	2.96e-05			0.695313	0.496738	0.584586	1.15123	0.39222
A0A0A0MTS7;Q8WZ42-12;Q8WZ42-13;Q8WZ42-11;Q8WZ42-4;Q8WZ42-7;Q8WZ42-2;Q8WZ42;Q8WZ42-8;Q8WZ42-5;A0A0A0MRA3;Q8WZ42-3;Q8WZ42-10;Q8WZ42-9	A0A0A0MTS7	Titin	TTN	PELDLRGIYQKLVIAKAGDNIKVEIPVLGRP	23646	22.3849	18.9139	18.2884	21.3833	20.3915	22.8078	21.2812	20.2985	22.3347	21.5962	20.6966	21.5667	22.3114	22.4737	K	2	___1	1	0.00334843			0.484217	0.604916	0.8324	0.944035	0.39531
Q8IVE0	Q8IVE0	Putative ciliary rootlet coiled-coil protein-like 2 protein	CROCCP3	DMLQAEKAEVAEALTKAEGRGGLPAGLPVQA	175	22.4376	22.8903	22.3096	23.2805	24.5328	24.0924	23.5674	23.2647	18.2111	23.7247	22.1499	22.7416	23.2974	23.9344	K	2	___1	1	0.00454831			0.487328	0.60599	-0.826686	-0.947704	0.395488
P35579;P35579-2	P35579	Myosin-9	MYH9	LVDLDHQRQSACNLEKKQKKFDQLLAEEKTI	1441	20.085	20.3366	20.5151	20.4491	19.9624	19.8348	18.3462	23.5055	19.8252	19.8196	20.1426	19.5399	20.7134	21.2428	K	2	___1	1	0.00209791			0.531844	0.572481	0.751399	0.997431	0.398449
F2Z3L7;Q9BS92	F2Z3L7	Protein NipSnap homolog 3B	NIPSNAP3B	YYLKPSNMNAFMENLKKNIHLRTSYSELVGF	57	22.1616	24.9087	24.3943	24.2132	23.0523	26.3798	23.6821	24.7195	22.5816	25.4905	25.5892	24.2723	26.0227	25.1195	K	2	___1	1	8.99e-45			0.554248	0.562909	0.714757	1.01995	0.40165
P07919;A0A096LP55	P07919	Cytochrome b-c1 complex subunit 6. mitochondrial;Cytochrome b-c1 complex subunit 6	UQCRH;UQCRHL	VDPLTTVREQCEQLEKCVKARERLELCDERV	42	18.5776	21.2935	19.5361	19.1505	20.4325	19.2157	20.3062	21.9364	18.6421	19.9435	21.2453	22.6289	19.5634	20.1796	K	2	___1	1	0.000264023			0.4922	0.605529	0.803871	0.951467	0.402101
P36871;P36871-3;P36871-2	P36871;P36871-2	Phosphoglucomutase-1	PGM1	MFDRSFVGKQFSANDKVYTVEKADNFEYSDP	464	22.1052	21.3177	19.7984	20.636	20.5981	18.6057	18.4073	22.464	19.1299	21.1915	21.2266	19.4762	21.7038	22.0714	K	2	___1	1	1.99e-16			0.469718	0.613958	0.827857	0.922748	0.408452
P48047;H7C068	P48047	ATP synthase subunit O. mitochondrial	ATP5O	SPLEEATLSELKTVLKSFLSQGQVLKLEAKT	162	29.5833	27.4423	30.9772	31.0352	30.7155	32.1693	31.2141	30.5152	30.2223	32.1814	30.7495	30.6319	31.6131	31.372	K	3	___1	1	1.17e-80			0.65049	0.525635	0.592643	1.10415	0.411615
Q9UKX2;Q9UKX2-2	Q9UKX2	Myosin-2	MYH2	IETYLLEKSRVVFQLKAERSYHIFYQITSNK	281	20.6513	19.5149	23.3742	22.8896	22.2295	23.5815	19.143	20.5622	23.2181	21.4173	20.3402	20.0471	18.4224	20.5064	K	2	___1	1	0.00219778			0.392092	0.657246	-0.981472	-0.819925	0.412262
P31415	P31415	Calsequestrin-1	CASQ1	FPEYDGVDRVINVNAKNYKNVFKKYEVLALL	55	24.3345	23.8795	22.9294	24.34	22.0648	23.3235	20.4237	24.284	23.4564	22.4937	23.3448	25.2646	23.498	24.5416	K	2	___1	1	3.76e-05			0.4778	0.609971	0.798243	0.930421	0.415527
P40939	P40939	Trifunctional enzyme subunit alpha. mitochondrial;Long-chain enoyl-CoA hydratase;Long chain 3-hydroxyacyl-CoA dehydrogenase	HADHA	VKGDVAVVRINSPNSKVNTLSKELHSEFSEV	60	27.4402	22.7532	26.8601	26.9282	28.0929	28.3281	27.4952	28.0988	27.9317	26.9933	27.6118	26.1896	28.1288	28.7623	K	2	___1	1	2.06e-44			0.456824	0.617987	0.8312	0.904529	0.417146
A0A087WT48;O60884	A0A087WT48	DnaJ homolog subfamily A member 2	DNAJA2	PLKVSLEDLYNGKTTKLQLSKNVLCSACSGQ	51	19.9052	20.4636	20.4098	21.9492	22.3465	22.3897	22.611	20.5279	18.5542	21.0759	22.1895	19.617	21.5806	22.1393	K	2	___1	1	0.00831878			0.60504	0.54083	-0.627228	-1.06204	0.417351
Q6YN16;Q6YN16-2	Q6YN16	Hydroxysteroid dehydrogenase-like protein 2	HSDL2	IVDVRDEQQISAAVEKAIKKFGGIDILVNNA	87	25.9586	22.4977	26.8365	26.683	27.6752	28.34	27.3227	27.4412	27.507	28.6987	27.2554	25.618	28.4394	26.3357	K	3	___1	1	2.5e-67			0.444079	0.626463	0.854528	0.888495	0.41737
P25705;P25705-2;P25705-3;K7ENJ4	P25705	ATP synthase subunit alpha. mitochondrial	ATP5A1	YVAIGQKRSTVAQLVKRLTDADAMKYTIVVS	261	25.0119	27.7655	26.6777	20.4658	26.4091	26.1348	26.8411	26.8506	24.7718	28.0051	26.2397	26.3467	26.6351	26.9318	K	2	___1	1	0.00207208			0.409879	0.646921	0.924986	0.843491	0.417703
P12883;P13533	P12883;P13533	Myosin-7;Myosin-6	MYH7;MYH6	EFNQIKAEIERKLAEKDEEMEQAKRNHLRVV;EFNQIKAEIERKLAEKDEEMEQAKRNHQRVV	1579	26.5677	24.3423	24.1264	24.5015	23.7928	24.7857	24.1398	26.7759	18.7984	23.4377	24.1374	24.1081	25.0277	24.2478	K	2	___1	1	6e-18			0.460711	0.616494	-0.817599	-0.908513	0.420071
A0A0A0MSE2;A0A0D9SFP2;E9PF18;Q16836;Q16836-3;Q16836-2;A0A1W2PNM1;A0A1W2PQV5;A0A1W2PQC2;A0A1W2PRT2;A0A1W2PQ78	A0A0A0MSE2	Hydroxyacyl-coenzyme A dehydrogenase. mitochondrial	HADH	VMKLVEVIKTPMTSQKTFESLVDFSKALGKH	192	22.4262	19.8705	25.3198	25.4297	26.9214	26.704	25.3074	24.1401	24.5113	27.1174	25.9313	22.9931	26.8376	26.7824	K	3	___1	1	0			0.410328	0.646869	0.904885	0.842477	0.425305
Q53GG5	Q53GG5	PDZ and LIM domain protein 3	PDLIM3	STVSTICPGDLKVAAKLAPNIPLEMELPGVK	169	25.3597	26.3586	25.5055	27.4106	18.4324	25.2306	21.0519	24.6947	18.4746	21.2156	20.372	25.0028	25.328	24.8192	K	2	___1	1	6.53e-10			0.272897	0.743057	-1.34891	-0.62966	0.428435
P11055;P12882;P12883;P13533;Q9UKX2;Q9UKX2-2;Q9UKX3;Q9Y623	P11055;P12882;P12883;P13533;Q9UKX2;Q9UKX3;Q9Y623	Myosin-3;Myosin-1;Myosin-7;Myosin-6;Myosin-2;Myosin-13;Myosin-4	MYH3;MYH1;MYH7;MYH6;MYH2;MYH13;MYH4	TGKLASADIETYLLEKSRVIFQLKAERDYHI;TGKLASADIETYLLEKSRVIFQLKAERNYHI;TGKLASADIETYLLEKSRVTFQLKAERSYHI;TGKLASADIETYLLEKSRVTFQLSSERSYHI;TGKLASADIETYLLEKSRVVFQLKAERSYHI	270	23.5179	20.7364	19.3114	20.4392	19.8219	23.9654	24.2832	23.0796	19.3935	24.3189	24.5915	19.0815	24.6688	23.272	K	3	___1	1	1.92e-196			0.40512	0.6521	0.904342	0.834394	0.430163
P60709;G5E9R0;E7EVS6;C9JZR7;C9JTX5;C9JUM1;P63261;I3L3I0;I3L1U9;K7EM38;I3L3R2;J3KT65;P68032;P62736;P63267;P68133;A6NL76;C9JFL5;F6UVQ4;F6QUT6;F8WB63;B8ZZJ2	P60709;P63261;P68032;P68133	Actin. cytoplasmic 1;Actin. cytoplasmic 1. N-terminally processed;Actin. cytoplasmic 2;Actin. cytoplasmic 2. N-terminally processed;Actin. alpha cardiac muscle 1;Actin. aortic smooth muscle;Actin. gamma-enteric smooth muscle;Actin. alpha skeletal muscle	ACTB;ACTG1;ACTC1;ACTA2;ACTG2;ACTA1	VGRPRHQGVMVGMGQKDSYVGDEAQSKRGIL	52	26.1558	19.197	21.6903	21.6337	22.9496	21.8206	18.5714	26.3626	22.2407	23.1336	22.7703	21.3415	19.3615	22.8001	K	3	___1	1	4.73e-50			0.421828	0.643952	0.855986	0.855443	0.435433
P54652	P54652	Heat shock-related 70 kDa protein 2	HSPA2	ELNADLFRGTLEPVEKALRDAKLDKGQIQEI	322	21.432	18.4178	21.4511	23.1068	22.6651	22.2615	20.6155	20.882	20.796	19.0111	22.5561	18.5754	21.8	20.8324	K	2	___1	1	0.00181772			0.459662	0.6184	-0.785257	-0.902872	0.435559
O75380;D6RBT3	O75380	NADH dehydrogenase [ubiquinone] iron-sulfur protein 6. mitochondrial	NDUFS6	LGARCFGVRVSPTGEKVTHTGQVYDDKDYRR	38	24.9063	21.8615	19.3221	22.2249	24.5883	22.3918	18.7365	25.5746	22.0121	20.2621	23.1268	23.4851	21.6569	22.9414	K	3	___1	1	5.89e-17			0.502266	0.605906	0.718229	0.951878	0.435771
P36542;P36542-2	P36542;P36542-2	ATP synthase subunit gamma. mitochondrial	ATP5C1	EGSIIFNKFRSVISYKTEEKPIFSLNTVASA	197	27.6376	27.0829	27.169	26.4158	26.2768	27.5921	27.3948	28.706	27.0097	27.8765	26.7441	25.8772	27.8182	28.0939	K	2	___1	1	7.27e-05			0.985583	0.46452	0.365228	1.25811	0.436553
B7Z9I1;Q5T4U5;P11310;P11310-2	B7Z9I1	Medium-chain specific acyl-CoA dehydrogenase. mitochondrial	ACADM	GQRCSDTRGIVFEDVKVPKENVLIGDGAGFK	220	25.5697	26.9696	28.1771	27.7117	29.3046	28.568	27.397	26.4222	27.2028	29.3118	28.1046	28.8535	28.7551	27.624	K	2	___1	1	8.7e-07			0.978031	0.465196	0.368043	1.25601	0.436559
K7EK07;P84243;K7EMV3;B4DEB1;K7ES00;K7EP01	K7EK07	Histone H3;Histone H3.3	H3F3B;H3F3A	GGKAPRKQLATKAARKSAPSTGGVKKPHRYR	28	22.3176	19.8882	17.5427	20.2834	19.4267	18.6376	21.1112	22.0669	20.4339	19.0891	20.1604	19.4189	20.6814	20.9113	K	2	___2	1	0.00686815			0.702644	0.513702	0.507786	1.1255	0.439751
P50461	P50461	Cysteine and glycine-rich protein 3	CSRP3	PARSVTTSNPSKFTAKFGESEKCPRCGKSVY	113	26.5037	23.5373	26.5554	27.4016	26.8811	27.3468	26.8513	26.0929	25.2968	25.3736	26.3746	24.093	26.7209	26.7394	K	2	___1	1	0.000622082			0.569374	0.562328	-0.626571	-1.01858	0.439791
K7ER15;Q9H0R4;K7EMY7;K7EJQ8;A0A1B0GXB1;K7EQD2	K7ER15	Haloacid dehalogenase-like hydrolase domain-containing protein 2	HDHD2	LRGASVIIRFVTNTTKESKQDLLERLRKLEF	50	19.7182	19.4506	20.2144	20.2195	20.4145	18.5251	19.5039	21.1005	19.0738	19.875	20.3403	20.0497	20.5689	20.74	K	2	___1	1	0.000147182			0.670923	0.526319	0.528857	1.10193	0.441751
P12883	P12883	Myosin-7	MYH7	LTRGKLTYTQQLEDLKRQLEEEVKAKNALAH	1316	26.5172	25.3946	22.0007	26.5989	28.5132	27.3772	26.4769	26.9875	27.2015	27.6869	27.0517	26.3778	26.6421	26.9731	K	2	___1	1	5.42e-121			0.411029	0.649617	0.863128	0.839768	0.441804
A0A0A0MTS7;Q8WZ42-12;Q8WZ42-13;Q8WZ42-11;Q8WZ42-4;Q8WZ42-7;Q8WZ42-2;Q8WZ42;Q8WZ42-8;Q8WZ42-5;A0A0A0MRA3;Q8WZ42-3;Q8WZ42-10;Q8WZ42-9	A0A0A0MTS7	Titin	TTN	KIGTGPPTESKPVIAKTKYDKPGRPDPPEVT	20958	18.1535	19.9191	21.4181	20.8588	21.1691	22.389	20.9393	20.9203	21.1953	19.157	19.7036	18.1215	19.4691	20.5982	K	3	___1	0.997691	0.00258574			0.435628	0.637905	-0.8117	-0.87125	0.442997
A2A274;Q99798	A2A274	Aconitate hydratase. mitochondrial	ACO2	TNSSYEDMGRSAAVAKQALAHGLKCKSQFTI	426	24.1839	21.135	19.8519	21.5425	23.8319	22.9734	21.0676	24.0641	19.5047	21.2583	22.9804	24.8268	22.7306	23.6006	K	3	___1	1	1.91e-23			0.559276	0.567076	0.625614	1.00586	0.446796
A0A286YFB1;H9KVA2;F8WA37;P45378-5;P45378-7;P45378-6;P45378-2;P45378-3;P45378	A0A286YFB1;H9KVA2	Troponin T. fast skeletal muscle	TNNT3	LEIDKFEFGEKLKRQKYDITTLRSRIDQAQK	206	27.3449	25.4853	25.4458	26.6447	26.5249	25.7566	19.8474	24.2249	26.6413	25.1198	27.2619	27.0945	26.2739	27.3785	K	2	___1	1	0.000388369			0.351373	0.699352	0.992171	0.754642	0.448103
P35232;C9JW96;E9PCW0	P35232	Prohibitin	PHB	QVAQQEAERARFVVEKAEQQKKAAIISAEGD	202	24.0815	21.9456	22.74	22.8794	23.0918	23.6361	23.9506	24.6189	18.8309	22.6088	23.0791	19.7171	24.1226	24.377	K	2	___1	1	6.62e-05			0.489878	0.608737	-0.710085	-0.933667	0.448895
P12883	P12883	Myosin-7	MYH7	SEKERLEAQTRPFDLKKDVFVPDDKQEFVKA	34	29.8534	28.7602	28.5344	28.2231	29.9717	29.4613	27.4074	29.9618	29.0098	29.6943	28.5488	29.3789	29.4802	29.6333	K	3	___1	1	2.46e-13			0.696164	0.517442	0.499371	1.11467	0.449113
P06733;P06733-2	P06733	Alpha-enolase	ENO1	FAPNILENKEGLELLKTAIGKAGYTDKVVIG	228	24.4344	25.7198	25.993	26.8377	26.432	25.5983	19.7675	25.5274	18.3878	25.9778	25.8095	19.8105	25.2979	25.602	K	2	___1	1	1.71e-12			0.290297	0.73292	-1.19569	-0.657657	0.449672
P12883;Q9Y2K3	P12883	Myosin-7;Myosin-15	MYH7;MYH15	SMYKLTGAIMHFGNMKFKLKQREEQAEPDGT	363	23.938	19.8442	19.7906	22.5929	22.0387	23.4857	21.6646	21.6968	19.5207	18.9306	21.0985	21.5303	23.6923	22.9529	K	3	___1	1	0.000740256			0.617041	0.5454	-0.5618	-1.05526	0.450139
Q9UKX2	Q9UKX2	Myosin-2	MYH2	LEKMCRTLEDQLSELKSKEEEQQRLINDLTA	1266	25.1896	23.8305	19.0765	24.9474	25.1361	25.147	23.4561	24.9503	25.3499	25.3721	24.9133	24.1709	23.3476	24.9379	K	2	___1	1	4.28e-30			0.387525	0.665568	0.894115	0.806138	0.450306
P11217;P11217-2	P11217	Glycogen phosphorylase. muscle form	PYGM	FKVFADYEDYIKCQEKVSALYKNPREWTRMV	787	24.5692	19.193	21.5519	21.1741	21.0533	22.2167	21.2977	22.7824	21.2368	22.46	23.5	19.2569	23.1629	23.7306	K	2	___1	1	7.32e-06			0.476706	0.61488	0.724814	0.91805	0.451312
O00499-6;O00499-11;O00499-2;O00499-9;O00499-10;O00499-7;O00499-8;O00499-4;O00499;O00499-3;O00499-5	O00499-6	Myc box-dependent-interacting protein 1	BIN1	KKDEAKIAKAEEELIKAQKVFEEMNVDLQEE	180	19.5324	22.3266	24.3747	25.3077	23.7503	22.5227	24.2782	21.3794	22.5563	23.8739	24.9898	24.6595	23.4221	24.4561	K	2	___1	1	1.47e-06			0.737948	0.508727	0.4635	1.13655	0.454947
A0A0A0MSQ0;P13797-3;P13797-2;P13797	A0A0A0MSQ0	Plastin-3	PLS3	RTLSEAGKSTSIQSFKDKTISSSLAVVDLID	532	24.9422	20.8575	19.7532	22.4841	20.3228	21.8634	22.3137	21.3669	20.33	21.8404	20.366	19.216	22.2927	22.0945	K	2	___1	1	0.00103292			0.474981	0.615223	-0.718629	-0.914667	0.455685
Q99714;Q99714-2;Q5H928	Q99714	3-hydroxyacyl-CoA dehydrogenase type-2	HSD17B10	AVLLDLPNSGGEAQAKKLGNNCVFAPADVTS	52	22.9051	19.2528	18.9349	19.785	25.5814	20.0809	20.1383	24.4023	24.4497	23.8809	22.1049	19.0586	19.9215	20.5489	K	3	___1	1	1.56e-57			0.310537	0.722385	1.09834	0.690274	0.455957
P21796	P21796	Voltage-dependent anion-selective channel protein 1	VDAC1	AWTAGNSNTRFGIAAKYQIDPDACFSAKVNN	224	24.0604	24.68	20.302	19.3867	22.9835	23.4357	22.6829	23.7243	19.6811	25.9158	25.0035	22.1182	24.3073	24.2535	K	2	___1	1	1.2e-63			0.319369	0.715963	1.0675	0.704347	0.456114
Q9UKX2	Q9UKX2	Myosin-2	MYH2	KMEIDDLASNVETVSKAKGNLEKMCRTLEDQ	1246	26.0944	24.359	25.3716	25.9375	26.1352	27.8954	26.3776	27.6626	27.2164	27.2753	26.4615	25.76	26.1621	26.2384	K	2	___1	1	1.21e-153			0.51145	0.606131	0.657943	0.952519	0.460781
P63104;E7EX29;E7ESK7;E5RGE1;E5RIR4;E9PD24;E7EVZ2	P63104	14-3-3 protein zeta/delta	YWHAZ	_______MDKNELVQKAKLAEQAERYDDMAA	9	22.3511	19.0552	21.8634	23.0466	22.3896	22.871	22.476	23.466	18.7157	21.7972	22.9806	18.448	22.3595	21.6799	K	2	___1	1	0.00525447			0.509161	0.606487	-0.658	-0.949534	0.462351
P48047;H7C0C1	P48047	ATP synthase subunit O. mitochondrial	ATP5O	LKEPKVAASVLNPYVKRSIKVKSLNDITAKE	84	24.0799	22.7982	22.448	22.1013	24.2674	23.2425	20.6153	24.7191	22.3805	23.8021	23.7281	22.596	23.059	23.9752	K	2	___1	1	1.38e-17			0.497691	0.605771	0.672486	0.937293	0.462711
P11055;P12882;Q9UKX2;Q9UKX2-2;Q9UKX3;Q9Y623	P11055;P12882;Q9UKX2;Q9UKX3;Q9Y623	Myosin-3;Myosin-1;Myosin-2;Myosin-13;Myosin-4	MYH3;MYH1;MYH2;MYH13;MYH4	EEAAERADIAESQVNKLRAKSRDVGSQKMEE;EEAEERADIAESQVNKLRAKTRDFTSSRMVV;EEAEERADIAESQVNKLRVKSREVHTKIISE;EEAEERADIAESQVNKLRVKSREVHTKVISE;EEAKERADIAESQVNKLRVKSREVHTKVISE	NaN	27.644	28.9735	28.8642	28.3314	28.6569	28.744	28.6327	27.7622	27.5751	28.5012	27.8586	27.7263	28.61	29.0541	K	2	___1	1	8.94e-74			0.844673	0.489487	-0.394171	-1.18033	0.464573
P12883;P13533	P12883;P13533	Myosin-7;Myosin-6	MYH7;MYH6	DEAEERADIAESQVNKLRAKSRDIGAKQKMH;DEAEERADIAESQVNKLRAKSRDIGTKGLNE	1919	27.644	28.9735	28.8642	28.3314	28.6569	28.744	28.6327	27.7622	27.5751	28.5012	27.8586	27.7263	28.61	29.0541	K	4	___1	1	8.94e-74			0.844673	0.490478	-0.394171	-1.18033	0.464573
P28838-2;P28838;H0Y983	P28838-2	Cytosol aminopeptidase	LAP3	AGKLRETLNISGPPLKAGKTRTFYGLHQDFP	48	20.4196	20.2043	20.8185	21.6132	21.2437	21.9247	20.1519	21.6549	21.7294	22.4976	21.9642	21.963	22.4506	18.1376	K	2	___1	1	3.51e-11			0.570636	0.566547	0.574486	1.00529	0.470086
P14618;P14618-3;B4DNK4;H3BQ34;P14618-2;H3BTN5;H3BR70	P14618;P14618-2	Pyruvate kinase PKM;Pyruvate kinase	PKM	VNLPGAAVDLPAVSEKDIQDLKFGVEQDVDM	224	21.9877	24.1143	25.4872	25.3189	24.6566	23.8776	24.6904	26.0375	20.0933	25.9235	26.6435	25.4171	25.538	26.2703	K	3	___1	1	1.18e-129			0.394418	0.661172	0.827215	0.810924	0.471772
P11055;P12882;P12883;P13533;Q9UKX2;Q9UKX3;Q9Y623	P11055;P12882;P12883;P13533;Q9UKX2;Q9UKX3;Q9Y623	Myosin-3;Myosin-1;Myosin-7;Myosin-6;Myosin-2;Myosin-13;Myosin-4	MYH3;MYH1;MYH7;MYH6;MYH2;MYH13;MYH4	DIDDLELTLAKVEKEKHATENKVKNLTEELS;DIDDLELTLAKVEKEKHATENKVKNLTEEMA;DIDDLELTLTKVEKEKHATENKVKNLSEEMT	968	25.2241	22.8439	21.7105	20.1825	21.2245	20.1164	19.6517	24.8496	22.1198	19.309	19.6312	19.1448	18.0806	22.7989	K	2	___1	1	1.2e-52			0.449753	0.631981	-0.7171	-0.879174	0.475863
P36871;P36871-3;P36871-2	P36871;P36871-2	Phosphoglucomutase-1	PGM1	KIRIDAMHGVVGPYVKKILCEELGAPANSAV	234	26.9084	24.1205	23.7612	25.075	24.3303	24.0038	23.7186	26.808	23.7425	24.4451	25.8171	24.0585	24.3426	26.2002	K	3	___1	1	1.47e-13			0.644845	0.539683	0.499457	1.06105	0.476351
Q12931-2;Q12931;I3L0K7	Q12931-2	Heat shock protein 75 kDa. mitochondrial	TRAP1	DVLQQRLIKFFIDQSKKDAEKYAKFFEDYGL	378	24.8647	20.1019	24.2449	24.2823	25.3485	25.4958	24.2369	26.6759	22.0489	26.9391	25.1965	21.7123	25.782	25.4998	K	2	___1	1	0.00288619			0.425402	0.645904	0.754214	0.849297	0.477701
Q9UBQ7;U3KQ56	Q9UBQ7	Glyoxylate reductase/hydroxypyruvate reductase	GRHPR	STMSVGIDHLALDEIKKRGIRVGYTPDVLTD	94	22.3205	20.0389	19.7752	23.1592	23.6965	24.8017	19.5395	23.9785	19.5472	25.3938	23.1319	19.4599	25.0086	23.4882	K	3	___1	1	3.22e-12			0.335805	0.714213	0.9538	0.726546	0.47831
E9PN17;O75964	E9PN17	ATP synthase subunit g. mitochondrial	ATP5L	QSLKKIVNSAQTGSFKQLTVKKKSST_____	66	24.6632	24.5427	24.1942	24.5823	25.555	25.7058	21.7248	25.6257	24.1664	26.2347	25.0541	23.0897	25.6448	26.7148	K	2	___1	1	2e-96			0.400275	0.65939	0.7946	0.816574	0.480774
E9PLK3;P55786;A6NEC2;E9PP11;P55786-2	E9PLK3;P55786-2	Puromycin-sensitive aminopeptidase;Puromycin-sensitive aminopeptidase-like protein	NPEPPS;NPEPPSL1	FVGELNDKMKGFYRSKYTTPSGEVRYAAVTQ	159	20.3826	18.4547	21.9998	23.4433	22.8844	23.3283	22.5503	23.869	22.0816	22.1932	23.4386	22.2553	22.4595	21.8292	K	2	___1	1	0.000184184			0.434738	0.643158	0.726143	0.859091	0.483413
F2Z337;P02144;B0QYF8;F2Z2F1	F2Z337;P02144	Myoglobin	MB	EKFDKFKHLKSEDEMKASEDLKKHGATVLTA	57	30.3364	29.7954	29.4429	30.5605	29.3253	30.0783	29.4354	30.6311	27.3719	28.89	29.7897	30.3127	29.0016	29.3179	K	2	___1	1	2.07e-19			0.60121	0.562302	-0.522757	-1.02298	0.484968
P24752;H0YEL7;P24752-2;E9PRQ6	P24752	Acetyl-CoA acetyltransferase. mitochondrial	ACAT1	PATKLGSIAIQGAIEKAGIPKEEVKEAYMGN	78	24.7244	27.2445	25.4331	27.6171	28.6232	27.7115	27.3599	26.4669	26.3707	25.0078	28.0298	23.4078	26.0341	27.9492	K	3	___1	1	7.94e-43			0.40374	0.658204	-0.7782	-0.820026	0.485076
P07451	P07451	Carbonic anhydrase 3	CA3	LLLKEPMTVSSDQMAKLRSLLSSAENEPPVP	224	26.2621	27.0409	26.4893	26.5472	25.2504	26.8125	25.3403	27.7326	25.7876	25.1433	27.7406	26.6387	27.3378	27.5349	K	3	___1	1	5.55e-12			0.525687	0.604444	0.596114	0.956392	0.485994
P07954-2;P07954	P07954-2	Fumarate hydratase. mitochondrial	FH	TAVGTGLNTRIGFAEKVAAKVAALTGLPFVT	249	30.6102	32.0115	32.3862	31.4934	32.9183	32.8825	33.0036	32.5261	31.5976	32.7856	32.3377	32.5671	33.4884	33.0904	K	2	___1	1	0.00308715			0.70884	0.529246	0.441028	1.09492	0.486835
P11055;P12882;P12883;Q9H6N6;P13533;Q9UKX2;Q9UKX3;Q9Y623	P11055;P12882;P12883;P13533;Q9UKX2;Q9UKX3;Q9Y623	Myosin-3;Myosin-1;Myosin-7;Putative uncharacterized protein MYH16;Myosin-6;Myosin-2;Myosin-13;Myosin-4	MYH3;MYH1;MYH7;MYH16;MYH6;MYH2;MYH13;MYH4	RALSKANSEVAQWRTKYETDAIQRTEELEEA;RALSKANTEVAQWRTKYETDAIQRTEELEEA;RAMSKANSEVAQWRTKYETDAIQRTEELEEA;RGMSKANSEVAQWRTKYETDAIQRTEELEEA;RVLSKANSEVAQWRTKYETDAIQRTEELEEA	1374	26.4305	23.8095	25.7547	27.115	26.1992	26.6284	25.8985	26.8982	27.233	25.5597	26.8643	26.3171	26.3978	26.6006	K	2	___1	1	0.000119478			0.540491	0.592799	0.576414	0.969423	0.488038
P55084;P55084-2;F5GZQ3	P55084	Trifunctional enzyme subunit beta. mitochondrial;3-ketoacyl-CoA thiolase	HADHB	RLEQDEYALRSHSLAKKAQDEGLLSDVVPFK	253	19.6043	19.7773	23.3584	22.9557	20.9087	24.8386	23.7318	23.9547	19.2871	23.0157	20.1646	25.1901	24.3079	25.219	K	2	___1	1	2.51e-06			0.365435	0.69248	0.852043	0.767837	0.48824
J3QS51;Q9NPH2-2;Q9NPH2-3;Q9NPH2	J3QS51	Inositol-3-phosphate synthase 1	ISYNA1	DHCVVIKYVPYVGDSKRALDEYTSELMLGGT	62	19.9948	25.4571	23.2654	24.9348	26.0682	24.379	19.6987	24.7607	23.4955	21.8307	25.5444	24.9537	24.4619	25.0704	K	2	___1	1	0.00165373			0.343095	0.711217	0.902757	0.735455	0.490082
P10809	P10809	60 kDa heat shock protein. mitochondrial	HSPD1	TTSEYEKEKLNERLAKLSDGVAVLKVGGTSD	396	26.052	19.7738	24.4234	24.8246	25.8078	26.5743	26.3032	25.6964	23.3951	27.0003	26.1802	23.8597	26.2583	26.3135	K	2	___1	1	9.65e-10			0.43415	0.64298	0.706342	0.855412	0.493562
D6RG39;D6RIT9;Q9NX40-3;Q9NX40-2;Q9NX40-4;Q9NX40;D6RBC5;D6RDI5;D6RI08;D6RA54;D6RC55;D6RDK1;D6RIV2;D6R9T5;D6RDK6;D6RBN5	D6RG39	OCIA domain-containing protein 1	OCIAD1	ITQGLISKGILSSHPKYGSIPKLILACIMGY	72	19.2721	19.7011	19.0581	20.8669	20.0169	20.4077	19.5846	21.9761	20.5271	21.8206	19.6438	18.6815	20.792	20.0122	K	2	___1	1	1.59e-06			0.472187	0.621532	0.649415	0.898662	0.493577
A0A087X1N7;P20929-3;P20929-2;P20929-4;P20929	A0A087X1N7	Nebulin	NEB	AIKAARASRDIASDYKYKKAYEQAKGKHIGF	1819	20.6021	20.8187	20.6225	20.9158	19.19	20.0063	20.0044	20.115	21.3434	20.3267	21.391	21.706	19.417	21.5994	K	2	___1	1	0.00429846			0.571437	0.574482	0.5341	0.993094	0.495217
P12277;H0YJG0;H0YJK0	P12277	Creatine kinase B-type	CKB	KLPNLGKHEKFSEVLKRLRLQKRGTGGVDTA	313	23.1061	25.8786	18.7224	24.6598	25.3024	25.231	20.9711	24.9538	24.8082	22.6284	24.3419	26.067	25.355	20.3653	K	2	___1	1	0.00680284			0.4596	0.628365	0.664028	0.884226	0.495236
Q9NRG7-2;Q9NRG7	Q9NRG7-2	Epimerase family protein SDR39U1	SDR39U1	KEVIGSRLETTQLLAKAITKAPQPPKAWVLV	91	21.0416	24.5173	18.6583	24.1268	23.6916	24.0315	20.5035	22.7104	18.98	25.5257	23.7329	23.576	24.865	24.3731	K	3	___1	1	1.7e-44			0.295099	0.73626	1.0275	0.660287	0.497491
A0A087X1N7;P20929-3;P20929-2;P20929-4;P20929	A0A087X1N7	Nebulin	NEB	PQLRQLKAAGDALSDKLYKENYEKTKAKSIN	385	29.6191	18.6879	20.1988	21.6109	21.6293	21.8575	20.3901	28.0597	20.7626	19.0874	21.394	18.2888	21.191	20.6551	K	2	___1	1	4.16e-05			0.465647	0.626446	-0.650715	-0.890056	0.497734
A0A0A0MTS7;Q8WZ42-12;Q8WZ42-13;Q8WZ42-11;Q8WZ42-4;Q8WZ42-7;Q8WZ42-2;Q8WZ42;Q8WZ42-8;Q8WZ42-5;A0A0A0MRA3;Q8WZ42-3;Q8WZ42-10;Q8WZ42-9	A0A0A0MTS7	Titin	TTN	PTYDGGSKITGYIVEKKELPEGRWMKASFTN	25045	23.1648	22.0176	21.9815	21.3746	19.7589	23.4156	20.1645	22.1635	22.3239	21.0616	22.1224	21.6029	23.5248	23.3785	K	2	___1	1	0.00345136			0.492331	0.615814	0.6143	0.91811	0.49838
Q06830;A0A0A0MRQ5	Q06830	Peroxiredoxin-1	PRDX1	AGWKPGSDTIKPDVQKSKEYFSKQK______	190	20.3621	18.6231	21.5673	22.225	21.4417	22.1254	21.9905	19.0676	20.8373	19.8254	21.3594	21.4095	21.2685	20.5349	K	3	___1	0.999984	3.82e-05			0.521203	0.605798	-0.576072	-0.945511	0.500899
C9J8Q5;P51649;P51649-2	C9J8Q5	Succinate-semialdehyde dehydrogenase. mitochondrial	ALDH5A1	TQGPLINEKAVEKVEKQVNDAVSKGATVVTG	366	17.9264	22.8619	23.5846	23.3361	23.1759	24.029	22.8605	26.1798	21.8805	24.2297	24.0188	19.8836	24.2731	24.1602	K	2	___1	1	1.86e-07			0.306413	0.72756	0.978758	0.677892	0.501297
P11217;P11217-2	P11217	Glycogen phosphorylase. muscle form	PYGM	ISVRGLAGVENVTELKKNFNRHLHFTLVKDR	29	26.8202	26.1461	26.8007	27.5947	27.4371	27.8442	25.4683	27.6735	25.5363	25.5732	27.5195	26.207	27.0833	25.5768	K	2	___1	1	2.94e-15			0.710851	0.531127	-0.420242	-1.08351	0.502655
P55084;P55084-2;F5GZQ3	P55084	Trifunctional enzyme subunit beta. mitochondrial;3-ketoacyl-CoA thiolase	HADHB	ELMSDVPIRHSRKMRKLMLDLNKAKSMGQRL	181	18.678	18.5576	19.4215	19.5597	22.8431	22.9746	22.9291	21.5694	21.2187	22.5036	19.337	20.9225	21.4374	23.146	K	2	___2	1	0.000960632			0.403826	0.658964	0.738715	0.815562	0.503139
P30405;H0Y548;R4GN99;P30405-2	P30405	Peptidyl-prolyl cis-trans isomerase F. mitochondrial;Peptidyl-prolyl cis-trans isomerase	PPIF	VDANGKPLGRVVLELKADVVPKTAENFRALC	67	24.5704	24.0059	26.451	27.0618	28.0132	28.4567	27.2539	25.7399	26.3223	29.5663	28.503	25.7063	28.2858	26.5096	K	2	___1	1	3.14e-10			0.433192	0.644884	0.688614	0.851393	0.50315
B8ZZX2;B8ZZV9;Q9H8M1-2;Q9H8M1	B8ZZX2	Coenzyme Q-binding protein COQ10 homolog B. mitochondrial	COQ10B	EVVKQMVAAFERRACKLYGPETNIPRELMLH	168	25.3421	18.7356	18.2982	22.5538	22.9249	24.4246	21.6675	24.2994	23.4733	24.2014	22.2461	18.3727	24.895	23.2551	K	2	___1	1	8.19e-05			0.304698	0.729105	0.9709	0.674544	0.506021
A0A0A0MTS7;Q8WZ42-12;Q8WZ42-13;Q8WZ42-11;Q8WZ42-4;Q8WZ42-7;Q8WZ42-2;Q8WZ42;Q8WZ42-8;Q8WZ42-5;A0A0A0MRA3;Q8WZ42-3;Q8WZ42-10;Q8WZ42-9	A0A0A0MTS7	Titin	TTN	KVLEADPYFTVKLHDKTAVEKDEITLKCEVS	14240	25.5467	19.4135	23.5436	23.9735	21.5239	24.4526	23.7168	25.0794	24.5957	22.7389	22.7595	23.2584	24.4045	24.5684	K	2	___1	1	3.39e-06			0.394704	0.66762	0.747743	0.802993	0.506831
P02042;P68871	P02042;P68871	Hemoglobin subunit delta;Hemoglobin subunit beta;LVV-hemorphin-7;Spinorphin	HBD;HBB	AYQKVVAGVANALAHKYH_____________	145	34.327	29.2025	30.645	30.8759	32.0859	30.4945	29.6668	33.3492	29.335	30.3841	32.3339	32.3594	31.4171	31.4679	K	2	___1	1	2.79e-83			0.614371	0.562953	0.478429	1.01896	0.508238
P09211;A0A087X243	P09211	Glutathione S-transferase P	GSTP1	SLIYTNYEAGKDDYVKALPGQLKPFETLLSQ	121	21.7845	19.6506	19.8616	20.3686	21.2458	19.5136	19.6139	21.8767	19.26	20.3302	21.5087	20.6912	20.3805	20.7976	K	2	___1	1	0.00230136			0.732227	0.531607	0.4009	1.08952	0.508686
P00558;P00558-2	P00558	Phosphoglycerate kinase 1	PGK1	LFDEEGAKIVKDLMSKAEKNGVKITLPVDFV	272	21.2406	19.6119	20.5348	21.9112	19.3301	20.449	20.587	22.6344	19.5234	18.0978	20.1774	19.7785	19.7368	19.8153	K	2	___1	1	0.00362674			0.526527	0.605589	-0.557286	-0.946849	0.508832
P00738;A0A0C4DGL8;J3QLC9;J3QR68;H0Y300;P00738-2;A0A087WU08;H3BS21	P00738	Haptoglobin;Haptoglobin alpha chain;Haptoglobin beta chain	HP	GRVGYVSGWGRNANFKFTDHLKYVMLPVADQ	291	19.3032	19.3275	21.543	20.6341	21.7818	20.694	18.9513	21.6019	20.5705	20.4401	19.2198	19.5272	23.2226	23.1297	K	2	___1	1	2.54e-05			0.374285	0.687116	0.782415	0.775509	0.509511
Q14315-2;Q14315	Q14315-2	Filamin-C	FLNC	LKVTVKGPKGTEEPVKVREAGDGVFECEYYP	524	22.1685	22.4372	21.2097	22.478	19.8429	21.3676	19.3289	23.2173	18.0059	21.6214	22.9417	23.1559	22.5282	23.1585	K	2	___1	1	0.00211512			0.350664	0.709022	0.828014	0.742294	0.512442
P37837	P37837	Transaldolase	TALDO1	VPVLSAKAAQASDLEKIHLDEKSFRWLHNED	286	25.0458	20.1717	20.634	22.8884	23.8104	21.5884	22.6709	25.3039	18.4649	20.0839	23.4057	19.922	22.2107	23.0018	K	3	___1	1	6.09e-06			0.454294	0.636153	-0.630957	-0.870894	0.516844
P55084;P55084-2;F5GZQ3;B5MD38	P55084	Trifunctional enzyme subunit beta. mitochondrial;3-ketoacyl-CoA thiolase	HADHB	TKDNGIRPSSLEQMAKLKPAFIKPYGTVTAA	291	25.578	22.6052	24.6422	23.0736	25.9192	26.4854	25.3107	26.9821	21.6351	26.8629	25.8022	23.7485	26.2384	26.9926	K	2	___1	1	1.72e-16			0.430668	0.647361	0.663928	0.843939	0.517687
P48735;P48735-2	P48735	Isocitrate dehydrogenase [NADP]. mitochondrial	IDH2	QTDDQVTIDSALATQKYSVAVKCATITPDEA	106	30.0919	30.3497	30.4795	30.3016	32.32	30.8238	29.5714	27.3885	31.6363	33.0306	31.6701	31.1085	32.2706	31.6012	K	3	___1	1	0			0.419395	0.652459	0.681129	0.830556	0.51801
A0A0A0MSE2;A0A0D9SFP2;E9PF18;Q16836;Q16836-3;Q16836-2;A0A1W2PNM1;A0A1W2PQ78	A0A0A0MSE2	Hydroxyacyl-coenzyme A dehydrogenase. mitochondrial	HADH	LHQPSPSLNKLVAENKFGKKTGEGFYKYK__	304	23.5215	19.7675	24.2062	25.6268	25.8287	25.6207	24.9565	26.1828	24.2362	24.1279	25.5046	23.4686	25.4204	25.7598	K	2	___1	1	0.0016989			0.385182	0.678488	0.738914	0.787611	0.519258
P13805-2;P13805-3;P13805;K7EQL4;Q3B759;K7EKM3;K7ELB0;M0QY38	P13805-2	Troponin T. slow skeletal muscle	TNNT1	DWIHQLESEKFDLMAKLKQQKYEINVLYNRI	216	25.0271	19.2186	24.335	26.3742	27.1638	27.2234	26.8198	25.9368	20.5844	24.9028	25.3041	22.9518	25.6141	26.1121	K	2	___1	1	0.00503657			0.418305	0.652334	-0.6794	-0.828733	0.519761
A0A0C4DFU2;P04179-4;P04179;F5H3C5;F5H4R2;A0A0C4DFU1;F5GYZ5;P04179-2;G8JLJ2	A0A0C4DFU2	Superoxide dismutase;Superoxide dismutase [Mn]. mitochondrial	SOD2	LLEAIKRDFGSFDKFKEKLTAASVGVQGSGW	132	24.1581	23.4072	24.1283	19.7693	25.0755	24.2046	23.6797	25.1821	19.6873	26.7004	24.6347	23.9002	25.1558	24.9256	K	2	___2	1	2.09e-22			0.34376	0.712318	0.823343	0.730798	0.521155
Q16698-2;Q16698;E5RJG7;E5RFV2;E5RJD2	Q16698-2	2.4-dienoyl-CoA reductase. mitochondrial	DECR1	LGAQCVIASRKMDVLKATAEQISSQTGNKVH	88	22.1096	20.7818	18.357	20.3708	23.3453	23.8018	22.2065	23.9627	18.8538	23.8888	22.1171	22.0617	22.3139	23.4243	K	3	___1	1	9.51e-43			0.348438	0.711817	0.807071	0.737008	0.523342
A0A0A0MTS7;Q8WZ42-12;Q8WZ42-13;Q8WZ42-11;Q8WZ42-4;Q8WZ42-7;Q8WZ42-2;Q8WZ42;Q8WZ42-8;Q8WZ42-5;A0A0A0MRA3;Q8WZ42-3;Q8WZ42-10;Q8WZ42-9	A0A0A0MTS7	Titin	TTN	IENVPKKSTVTIVDSKRSDTGTYIIEAVNVC	16322	22.3013	22.7537	23.1124	21.1333	21.2263	23.3537	23.0164	21.6607	22.8793	21.9792	21.8695	19.7563	23.0422	22.8813	K	2	___1	1	0.000283214			0.689285	0.547233	-0.404086	-1.05255	0.526587
P62805;Q99525	P62805	Histone H4;Histone H4-like protein type G	HIST1H4A;HIST1H4G	___MSGRGKGGKGLGKGGAKRHRKVLRDNIQ	13	33.225	28.4472	32.8645	33.1537	32.9467	32.9239	32.7267	34.0049	32.1396	32.721	32.9784	32.8866	33.3436	32.2339	K	2	___2	1	0.00157391			0.479744	0.625759	0.574329	0.892492	0.530236
P62805;Q99525	P62805	Histone H4;Histone H4-like protein type G	HIST1H4A;HIST1H4G	SGRGKGGKGLGKGGAKRHRKVLRDNIQGITK	17	33.225	28.4472	32.8645	33.1537	32.9467	32.9239	32.7267	34.0049	32.1396	32.721	32.9784	32.8866	33.3436	32.2339	K	2	___2	1	0.00157391			0.479744	0.624781	0.574329	0.892492	0.530236
P13073;H3BN72;H3BNV9;H3BPG0	P13073	Cytochrome c oxidase subunit 4 isoform 1. mitochondrial	COX4I1	WSSLSMDEKVELYRIKFKESFAEMNRGSNEW	85	19.8815	20.3925	19.4828	21.4159	22.1444	22.5764	20.5685	20.2065	20.0383	25.3186	21.3028	18.9884	23.8366	22.4824	K	2	___2	1	2.06e-06			0.337403	0.712745	0.815942	0.719913	0.530516
P04040	P04040	Catalase	CAT	ENIAGHLKDAQIFIQKKAVKNFTEVHPDYGS	476	23.9579	24.3458	25.4633	24.3384	24.8738	23.926	25.5763	23.8521	18.7819	25.5132	24.7792	25.183	26.0806	22.79	K	2	___1	1	0.00327891			0.348935	0.711812	-0.785928	-0.735993	0.531817
Q06830;A0A0A0MSI0	Q06830	Peroxiredoxin-1	PRDX1	VMPDGQFKDISLSDYKGKYVVFFFYPLDFTF	35	22.6675	20.0178	21.7762	23.6712	21.1527	23.3943	22.4489	22.4336	23.4483	21.5451	22.932	17.5542	22.3224	19.7999	K	2	___1	1	0.00502713			0.375579	0.689277	-0.727586	-0.771735	0.533008
C9JZN9;P45378-4;H9KVA2;F8WA37;P45378-5;P45378-7;P45378-6;P45378-2;P45378-3;P45378;C9JCA5	C9JZN9;H9KVA2	Troponin T. fast skeletal muscle	TNNT3	QVEEEAQEEEEKPRPKLTAPKIPEGEKVDFD	23	24.6506	23.6867	23.0262	25.2143	23.7602	23.8427	22.6614	24.2653	21.7353	22.7505	24.4827	23.443	23.3176	23.7634	K	3	___1	1	0.00358012			0.619417	0.568055	-0.440614	-1.00587	0.533428
A0A0A0MTS7;Q8WZ42-12;Q8WZ42-13;Q8WZ42-11;Q8WZ42-4;Q8WZ42-7;Q8WZ42-2;Q8WZ42;Q8WZ42-8	A0A0A0MTS7	Titin	TTN	AAKVPMKPKRVVAEEKVPVPRKEVAPPVRVP	11126	19.473	21.0157	20.8107	20.7177	20.3505	21.3936	21.0245	21.1229	18.3004	19.3509	20.3904	20.4909	20.347	20.8833	K	2	___1	1	0.00106777			0.489484	0.62005	-0.557128	-0.900637	0.533697
A0A286YFB1;C9JZN9;P45378-4;H9KVA2;F8WA37;P45378-5;P45378-7;P45378-6;P45378-2;P45378-3;P45378;C9JCA5	A0A286YFB1;C9JZN9;H9KVA2	Troponin T. fast skeletal muscle	TNNT3	KALSSMGANYSSYLAKADQKRGKKQTAREMK	141	18.6905	18.7652	20.7849	22.3294	20.8349	20.6849	19.3107	21.2681	19.4061	19.0448	21.0085	22.4763	20.1849	22.762	K	3	___1	1	3.39e-10			0.39915	0.668833	0.6786	0.800829	0.535966
P25705;P25705-2;P25705-3	P25705	ATP synthase subunit alpha. mitochondrial	ATP5A1	VSQHQALLGTIRADGKISEQSDAKLKEIVTN	531	24.4936	23.8974	25.2897	23.2429	24.8225	25.8807	25.3484	25.9397	24.2049	27.3109	25.1741	24.2715	26.5858	23.4481	K	2	___2	1	2.34e-18			0.476476	0.628379	0.565686	0.886169	0.537606
P25705;P25705-2;P25705-3	P25705	ATP synthase subunit alpha. mitochondrial	ATP5A1	GTIRADGKISEQSDAKLKEIVTNFLAGFEA_	539	24.4936	23.8974	25.2897	23.2429	24.8225	25.8807	25.3484	25.9397	24.2049	27.3109	25.1741	24.2715	26.5858	23.4481	K	2	___2	1	1.75e-22			0.476476	0.627405	0.565686	0.886169	0.537606
P11142;E9PKE3;E9PNE6;P11142-2;A8K7Q2;E9PN89	P11142	Heat shock cognate 71 kDa protein	HSPA8	ELNADLFRGTLDPVEKALRDAKLDKSQIHDI	319	23.7569	23.4334	24.6234	25.3429	25.0485	25.7001	24.3273	25.1911	24.3734	18.2513	25.0768	24.0052	24.4704	25.2885	K	2	___1	1	9.53e-06			0.33762	0.713008	-0.796543	-0.718722	0.538358
Q5JRX3;Q5JRX3-2;A0A0A0MRX9;Q5JRX3-3;H0Y4F7	Q5JRX3	Presequence protease. mitochondrial	PITRM1	DGDPVELLKLGNQLAKFRQCLQENPKFLQEK	473	19.3238	21.6441	19.3902	20.2281	20.8535	21.6697	22.0076	22.6852	17.3319	22.9745	22.3539	20.341	22.0925	22.9627	K	2	___1	1	0.00219901			0.334661	0.710895	0.803529	0.714483	0.538381
P13929;P13929-2;E5RGZ4;K7EKN2;K7EPM1;E5RI09;E5RG95	P13929	Beta-enolase;Enolase	ENO3	GPALLQKKLSVVDQEKVDKFMIELDGTENKS	89	31.2465	29.2269	28.563	23.3843	23.5225	29.5017	29.4013	31.0354	26.1258	28.6091	24.5797	21.3082	29.6396	29.5089	K	2	___1	1	1.6e-13			0.45442	0.643138	-0.577071	-0.859979	0.546723
O43678;O43678-2	O43678	NADH dehydrogenase [ubiquinone] 1 alpha subcomplex subunit 2	NDUFA2	___MAAAAASRGVGAKLGLREIRIHLCQRSP	13	20.2341	20.0541	25.3484	25.1316	26.5178	27.6191	25.9447	27.6715	21.889	23.7171	26.3729	22.502	28.1373	26.9658	K	2	___1	1	0.00415748			0.28603	0.740512	0.915114	0.639277	0.54733
P07355;P07355-2;H0YN42;H0YMD0;H0YMU9;A6NMY6;H0YKS4;H0YMM1;H0YKZ7;H0YLV6;H0YMT9;H0YKX9;H0YKL9;H0YMW4;H0YMD9;H0YKV8;H0YKN4	P07355	Annexin A2;Annexin;Putative annexin A2-like protein	ANXA2;ANXA2P2	NFDAERDALNIETAIKTKGVDEVTIVNILTN	47	22.1928	21.4508	21.7915	23.1181	21.9522	23.4372	20.0149	22.0869	24.0623	23.4068	22.0886	22.1439	21.7819	22.7355	K	2	___1	1	6.22e-07			0.421327	0.656304	0.6212	0.823608	0.547358
P00338;P00338-3;P00338-4;P00338-5;P00338-2	P00338	L-lactate dehydrogenase A chain	LDHA	AGVSLKTLHPDLGTDKDKEQWKEVHKQVVES	222	24.7619	20.5999	18.6348	22.4044	18.2561	22.336	18.4674	25.2124	19.0427	19.6193	21.7271	18.8101	20.0605	17.424	K	3	___1	1	3.5e-05			0.5102	0.616102	-0.5092	-0.912365	0.549802
P30041	P30041	Peroxiredoxin-6	PRDX6	GMPVTARVVFVFGPDKKLKLSILYPATTGRN	141	25.1493	19.0377	26.0475	27.1122	26.615	26.1244	25.4468	26.4178	17.4557	25.924	27.5956	27.4062	27.0565	26.9564	K	2	___1	1	0.00208309			0.549835	0.604046	0.468472	0.943817	0.552609
P00568;Q5T9B7	P00568	Adenylate kinase isoenzyme 1	AK1	FVVGGPGSGKGTQCEKIVQKYGYTHLSTGDL	27	23.9484	20.5566	24.2807	24.4876	21.1062	20.5775	20.9962	25.1558	22.485	22.5407	23.7594	19.4948	23.0376	24.158	K	2	___1	1	3.73e-05			0.384056	0.686207	0.6683	0.777171	0.553777
P31040-2;P31040;A0A087X1I3;P31040-3	P31040-2	Succinate dehydrogenase [ubiquinone] flavoprotein subunit. mitochondrial	SDHA	LQEGCGKISKLYGDLKHLKTFDRGMVWNTDL	499	23.0882	21.4908	18.6779	19.5418	19.5033	22.8842	20.4529	24.9855	20.4393	25.1828	21.2221	19.5443	19.2058	21.0051	K	3	___2	1	0.000595313			0.301708	0.73535	0.8494	0.662818	0.55428
A0A1B0GTB8;A0A1B0GWC0;A0A1B0GVF3;P23786;A0A1B0GV75;A0A1B0GTM0;A0A1B0GUD9	A0A1B0GTB8	Carnitine O-palmitoyltransferase 2. mitochondrial	CPT2	PTMHYQDSLPRLPIPKLEDTIRRYLSAQKPL	56	22.1534	21.3488	25.385	23.3944	25.527	25.3357	24.6788	23.5664	18.6799	26.3959	23.5635	19.0612	25.7066	25.2265	K	2	___1	1	0.000696251			0.31842	0.722407	-0.8033	-0.687816	0.554898
Q9P2R7-2;Q9P2R7;A0A0U1RQL1	Q9P2R7-2	Succinyl-CoA ligase [ADP-forming] subunit beta. mitochondrial	SUCLA2	VIAQGIVMAVKDLEIKIPVVVRLQGTRVDDA	379	19.6306	20.2851	21.7493	22.3502	24.0604	23.4967	23.488	25.0341	19.9091	26.6161	23.3906	20.0088	23.433	22.7915	K	2	___1	1	3.35e-05			0.292106	0.737454	0.8747	0.647783	0.555258
Q5TD07;P16083;Q5TD05	Q5TD07	Ribosyldihydronicotinamide dehydrogenase [quinone]	NQO2	AYKQRSLASDITDEQKKVREADLVIFQGKLA	90	19.4523	22.997	22.7413	19.1476	20.8052	19.7538	20.2385	22.2968	18.935	18.9609	20.8017	20.8742	18.8948	19.039	K	2	___1	1	4.28e-39			0.334194	0.713401	-0.7619	-0.710277	0.556387
P11217;P11217-2	P11217	Glycogen phosphorylase. muscle form	PYGM	AFIRDVAKVKQENKLKFAAYLEREYKVHINP	545	22.6213	24.1846	23.5593	24.6972	19.5968	23.796	19.0931	23.5123	18.9995	20.8226	19.7398	20.367	24.8052	23.0575	K	2	___1	1	0.00733393			0.284257	0.740533	-0.892057	-0.635018	0.557734
P12883	P12883	Myosin-7	MYH7	EARVRELENELEAEQKRNAESVKGMRKSERR	1831	26.6429	24.5563	23.7642	24.643	24.9085	25.3018	24.3913	26.2584	23.4338	24.4102	24.1857	24.8738	24.855	23.943	K	3	___1	1	9.36e-105			0.78782	0.540723	-0.321157	-1.06337	0.558452
Q8NE86-3;Q8NE86	Q8NE86-3	Calcium uniporter protein. mitochondrial	MCU	IERLEDLKEQLAPLEKVRIEISRKAEKRTTL	170	19.375	20.7149	22.0724	21.3607	23.3242	23.8608	23.2444	20.5515	22.9284	23.9036	22.4265	19.9272	24.5677	24.0756	K	2	___1	1	0.00242074			0.39546	0.677634	0.632586	0.78869	0.562131
P30038;P30038-2;P30038-3;Q5TF55	P30038	Delta-1-pyrroline-5-carboxylate dehydrogenase. mitochondrial	ALDH4A1	EWDLKPIADRAQIFLKAADMLSGPRRAEILA	130	21.395	20.712	18.8569	24.7687	25.7626	26.2163	24.748	20.9209	22.3861	24.7415	24.7813	23.9988	26.2308	24.5793	K	2	___1	1	6.55e-06			0.336944	0.711931	0.739886	0.712711	0.563248
P51884;CON__Q05443	P51884	Lumican	LUM	YLDNNKISNIPDEYFKRFNALQYLRLSHNEL	226	19.7953	21.6451	20.9368	22.7545	23.1665	20.6653	20.1381	21.0451	21.3738	20.7621	22.0968	23.0695	21.6856	22.2257	K	2	___1	1	0.000219135			0.551586	0.605558	0.451	0.938447	0.563942
P12882;P12883;P13533;Q9UKX2;Q9UKX3;Q9Y623	P12882;P12883;P13533;Q9UKX2;Q9UKX3;Q9Y623	Myosin-1;Myosin-7;Myosin-6;Myosin-2;Myosin-13;Myosin-4	MYH1;MYH7;MYH6;MYH2;MYH13;MYH4	SAQIEMNKKREAEFQKMRRDLEEATLQHEAT;SAQIEMNKKREAEFQKMRRDLEESTLQHEAT;SVQIEMNKKREAEFQKMRRDLEEATLQHEAT	1173	26.5805	24.3564	25.1497	25.7532	24.5063	25.6114	24.7631	26.0199	23.8181	24.5544	25.5799	23.9087	25.4734	25.3659	K	2	___1	1	0.00248656			0.867031	0.53627	-0.285757	-1.07455	0.565249
O00330-3;O00330;H0YD97;O00330-2	O00330-3	Pyruvate dehydrogenase protein X component. mitochondrial	PDHX	FRPVLKLTEDEEGNAKLQQRQLITVTMSSDS	445	25.8003	24.7538	26.3469	25.9714	25.7345	26.5585	25.6157	26.8578	25.0492	26.2868	25.9642	25.662	26.5961	26.4002	K	3	___1	1	0			0.84916	0.537978	0.290743	1.0697	0.566387
P31040-2;P31040;A0A087X1I3;P31040-3	P31040-2	Succinate dehydrogenase [ubiquinone] flavoprotein subunit. mitochondrial	SDHA	LQEGCGKISKLYGDLKHLKTFDRGMVWNTDL	499	30.2277	25.2777	25.7491	25.2302	27.2022	27.1111	26.163	30.7177	23.3928	30.0414	27.3972	24.6582	27.7203	28.0262	K	3	___1	1	0.000595313			0.341031	0.711346	0.713257	0.71662	0.57116
P16219;E9PE82	P16219	Short-chain specific acyl-CoA dehydrogenase. mitochondrial	ACADS	VNYAENRMAFGAPLTKLQVIQFKLADMALAL	306	20.1804	19.3922	24.7889	23.3826	25.6079	25.2794	22.7834	20.9241	21.0346	20.3133	22.6597	24.2571	24.4246	23.2677	K	2	___1	1	1.53e-17			0.375402	0.69531	-0.647672	-0.761502	0.571298
A0A0A0MTS7;Q8WZ42-12;Q8WZ42-13;Q8WZ42-11;Q8WZ42-4;Q8WZ42-7;Q8WZ42-2;Q8WZ42;Q8WZ42-8;Q8WZ42-5;A0A0A0MRA3;Q8WZ42-3;Q8WZ42-10;Q8WZ42-9	A0A0A0MTS7	Titin	TTN	DPYFTVKLHDKTAVEKDEITLKCEVSKDVPV	14245	23.5816	21.4849	22.0983	22.4427	19.2631	23.7621	23.8588	23.0027	22.6091	19.6205	20.5327	20.7526	22.9741	23.2012	K	2	___1	1	0.001012			0.44368	0.650973	-0.542657	-0.837871	0.574426
P42126-2;P42126;Q96DC0;H3BS70	P42126-2	Enoyl-CoA delta isomerase 1. mitochondrial	ECI1;DCI	FLTELVISLEKLENDKSFRGVILTSDRPGVF	89	29.1067	25.4786	28.3125	28.3885	29.2036	29.8082	29.6066	30.0514	28.6	29.4744	28.7031	28.2544	29.5868	28.9292	K	2	___1	1	8.22e-11			0.452335	0.648516	0.5278	0.845486	0.577109
P51608;P51608-2	P51608	Methyl-CpG-binding protein 2	MECP2	VKEVVKPLLVSTLGEKSGKGLKTCKSPGRKS	331	21.0292	20.8004	18.9611	22.3438	22.1178	20.8831	21.5144	21.4467	19.6177	19.9586	22.425	22.5632	22.407	22.0216	K	2	___1	1	0.000401631			0.591139	0.60553	0.398571	0.954087	0.581285
P05976;P05976-2	P05976;P05976-2	Myosin light chain 1/3. skeletal muscle isoform	MYL1	VMGAELRHVLATLGEKMKEEEVEALMAGQED	162	27.9172	25.6726	26.9534	27.3008	27.0991	26.9643	23.7559	27.1129	22.1904	26.3558	27.6436	24.8094	26.2772	26.7401	K	3	___1	1	3.28e-07			0.363765	0.707683	-0.6477	-0.744097	0.581285
Q8IVN3;C9JYJ2;A8MSY1	Q8IVN3	Musculoskeletal embryonic nuclear protein 1	MUSTN1;TMEM110-MUSTN1	SVFSRTRTGTETVFEKPKAGPTKSVFG____	71	23.8301	22.9656	25.8184	25.3429	25.5101	26.2879	26.0365	24.6451	23.1015	24.1917	25.9937	23.9232	25.7154	25.1474	K	2	___1	1	3.09e-10			0.536229	0.61466	-0.439071	-0.916252	0.58151
P00558	P00558	Phosphoglycerate kinase 1	PGK1	KGKRVVMRVDFNVPMKNNQITNNQRIKAAVP	30	23.7851	24.7621	24.2336	25.2676	24.9425	24.8192	22.9767	25.3176	24.9536	23.8193	25.258	25.0725	24.2871	25.2001	K	3	___1	1	8.19e-14			0.527031	0.617103	0.445914	0.908873	0.582089
A0A0A0MTS7;Q8WZ42-12;Q8WZ42-13;Q8WZ42-11;Q8WZ42-4;Q8WZ42-7;Q8WZ42-2;Q8WZ42;Q8WZ42-8;Q8WZ42-5;A0A0A0MRA3;Q8WZ42-3;Q8WZ42-10;Q8WZ42-9	A0A0A0MTS7	Titin	TTN	KEEWEKGKDKEVRGTKLVVTGLKEGAFYKFR	19047	19.0462	18.9864	20.7463	21.7808	19.6141	22.5396	23.3951	21.0495	19.224	19.6188	19.7071	18.1059	22.2488	22.5554	K	2	___1	1	0.00617224			0.454828	0.648114	-0.514143	-0.845096	0.583651
Q9UKX2;Q9UKX2-2	Q9UKX2	Myosin-2	MYH2	SGAQTAEGEGAGGGAKKGGKKKGSSFQTVSA	640	22.9128	19.9338	23.52	23.7543	22.2314	19.8943	19.3005	23.0783	20.1654	23.6248	23.5795	18.5705	23.3303	24.65	K	3	___1	1	2.18e-68			0.300219	0.732822	0.778814	0.655659	0.583694
Q14315-2;Q14315	Q14315-2	Filamin-C	FLNC	AIKYGGPQHIVGSPFKAKVTGPRLSGGHSLH	2556	23.7192	19.2505	19.9546	21.9446	21.1456	22.0413	19.3498	23.9733	18.9738	18.7148	22.829	20.026	21.5658	18.7125	K	3	___1	1	2.14e-05			0.626672	0.590292	-0.372914	-0.972709	0.583855
A0A087WXC5;E7ESZ7;O95299;O95299-2;Q8N1B9;C9J6X0	A0A087WXC5	NADH dehydrogenase [ubiquinone] 1 alpha subcomplex subunit 10. mitochondrial	NDUFA10	NICTGKGKLAKEIAEKLGFKHFPEAGIHYPD	80	28.6499	21.1588	26.5489	26.5329	28.1672	28.1317	27.9738	28.9664	24.4032	29.2854	27.6531	24.8055	28.0771	28.6342	K	2	___1	1	0.00356379			0.350747	0.71519	0.665957	0.726573	0.584007
P36957;P36957-2	P36957	Dihydrolipoyllysine-residue succinyltransferase component of 2-oxoglutarate dehydrogenase complex. mitochondrial	DLST	MNFADIERTITELGEKARKNELAIEDMDGGT	353	19.3675	22.3474	22.594	21.0471	23.1414	23.278	22.3411	23.9091	20.1938	22.0641	22.8137	22.9791	23.5765	23.169	K	2	___1	1	0.000593836			0.356111	0.71184	0.655543	0.733513	0.58419
P48735;P48735-2	P48735	Isocitrate dehydrogenase [NADP]. mitochondrial	IDH2	IASIFAWTRGLEHRGKLDGNQDLIRFAQMLE	384	31.5014	28.1007	30.8542	29.9991	31.7344	31.8819	31.1389	32.0818	30.342	32.0212	30.5461	29.766	32.0234	31.9254	K	2	___1	1	1.21e-15			0.467394	0.643764	0.499328	0.856801	0.584275
P08758;D6RBL5;E9PHT9	P08758	Annexin A5;Annexin	ANXA5	DLLDDLKSELTGKFEKLIVALMKPSRLYDAY	79	19.8047	20.9698	22.2156	23.7743	22.5474	24.2776	22.8504	21.4905	20.7858	23.9271	23.9317	23.8132	23.6163	22.0529	K	2	___1	1	0.00127329			0.507677	0.625508	0.453957	0.88998	0.588215
Q9NR19;Q9NR19-2	Q9NR19	Acetyl-coenzyme A synthetase. cytoplasmic	ACSS2	VTKFYTAPTAIRLLMKFGDEPVTKHSRASLQ	418	24.5232	22.2023	23.8782	24.247	24.6484	24.4699	23.9205	25.1357	22.1322	25.1558	25.0263	23.2298	25.0717	25.0323	K	2	___1	1	6.16e-07			0.556875	0.613552	0.413472	0.92667	0.588502
P06733;P06733-2	P06733	Alpha-enolase	ENO1	GQIKTGAPCRSERLAKYNQLLRIEEELGSKA	406	23.5853	20.4258	22.4198	24.1428	24.7746	23.8473	22.7828	24.4709	18.6754	23.7546	23.6986	19.5238	23.0505	23.9981	K	2	___1	1	0.000436869			0.334595	0.715709	-0.686643	-0.703725	0.589186
O14983-2;O14983	O14983-2	Sarcoplasmic/endoplasmic reticulum calcium ATPase 1	ATP2A1	ETTGLTPDQVKRNLEKYGLNELPAEEGKTLW	35	23.8964	19.2248	20.8084	23.377	23.5116	23.0579	22.1014	23.6777	22.1652	18.3686	22.8786	19.1866	21.5467	23.289	K	2	___1	1	2.36e-182			0.329178	0.719263	-0.695015	-0.695998	0.590496
P10412;P16401;P16402;P16403;Q02539	P10412;P16401;P16402;P16403;Q02539	Histone H1.4;Histone H1.5;Histone H1.3;Histone H1.2;Histone H1.1	HIST1H1E;HIST1H1B;HIST1H1D;HIST1H1C;HIST1H1A	GTLVQTKGTGASGSFKLNKKAASGEAKPKAK;GTLVQTKGTGASGSFKLNKKAASGEAKPKVK;GTLVQTKGTGASGSFKLNKKAASGEGKPKAK;GTLVQTKGTGASGSFKLNKKASSVETKPGAS	106	23.5012	20.3877	24.4062	25.6992	25.2584	25.035	25.0915	26.5238	23.8309	24.87	26.0726	22.2941	25.2961	25.0673	K	2	___1	1	2.66e-17			0.348959	0.713455	0.653658	0.722342	0.591426
P06732	P06732	Creatine kinase M-type;Creatine kinase M-type. N-terminally processed	CKM	TLPPHCSRGERRAVEKLSVEALNSLTGEFKG	156	27.6968	26.8624	27.9725	29.2554	28.0566	28.074	26.1268	28.0357	26.7048	26.8747	29.404	26.3493	27.4063	26.5932	K	3	___1	1	3.26e-193			0.589374	0.603783	-0.382357	-0.942754	0.595181
P14618;H3BQ34;H3BT25;H3BUW1;H3BTJ2;H3BU13;P14618-2;H3BTN5	P14618;P14618-2	Pyruvate kinase PKM;Pyruvate kinase	PKM	IICTIGPASRSVETLKEMIKSGMNVARLNFS	62	22.3805	19.7899	22.5714	24.4251	23.9032	24.1504	23.5315	24.2561	21.6308	23.2967	23.8815	21.758	24.2217	25.5117	K	2	___1	1	0.000262023			0.413601	0.669903	0.5435	0.797822	0.595948
C9J8T6;Q14061	C9J8T6	Cytochrome c oxidase copper chaperone	COX17	PGLVDSNPAPPESQEKKPLKPCCACPETKKA	17	18.7834	21.2132	18.8484	21.6044	22.4978	20.9302	19.258	20.9515	19.3134	18.7136	21.7283	23.0697	21.012	22.216	K	2	___1	1	1.08e-93			0.40348	0.680108	0.552728	0.785872	0.598391
P06732	P06732	Creatine kinase M-type;Creatine kinase M-type. N-terminally processed	CKM	VDGVKLMVEMEKKLEKGQSIDDMIPAQK___	369	29.276	29.6061	27.9449	30.2173	30.4648	29.7097	28.4492	28.4515	27.6598	29.6189	28.0128	29.708	29.3589	29.2736	K	3	___1	1	6.06e-222			0.433162	0.658533	-0.512071	-0.816545	0.600054
F2Z337;P02144;B0QYF8;F2Z2F1	F2Z337;P02144	Myoglobin	MB	GHPETLEKFDKFKHLKSEDEMKASEDLKKHG	51	28.0862	26.0132	25.8437	26.7742	25.6379	25.8715	25.1782	28.5562	24.943	25.5335	26.4148	26.7729	26.8818	27.5256	K	2	___1	1	2.89e-08			0.481451	0.642365	0.460414	0.861491	0.600252
P04406;P04406-2;E7EUT5	P04406	Glyceraldehyde-3-phosphate dehydrogenase	GAPDH	PTANVSVVDLTCRLEKPAKYDDIKKVVKQAS	251	19.0331	23.7827	22.2548	22.7654	23.4764	22.3843	21.2241	26.1401	18.8073	23.5665	24.0052	23.4811	21.673	23.2499	K	2	___1	0.999998	8.84e-07			0.257777	0.76051	0.857471	0.58625	0.601123
P40926;P40926-2;G3XAL0	P40926	Malate dehydrogenase. mitochondrial;Malate dehydrogenase	MDH2	IEKNLGIGKVSSFEEKMISDAIPELKASIKK	314	29.0727	29.4653	30.3124	30.1354	31.4084	30.0104	30.3275	29.3154	28.3777	32.1767	31.0396	30.5519	31.2668	31.1183	K	3	___1	1	1.73e-72			0.49435	0.63711	0.4449	0.87103	0.602648
P12883	P12883	Myosin-7	MYH7	TEQLGSSGKTIHELEKVRKQLEAEKMELQSA	1528	29.6905	27.7352	27.7752	28.5355	28.5784	28.6962	28.5285	29.4834	27.8976	27.6554	28.3441	26.6818	28.6267	28.4219	K	3	___1	1	9.15e-23			0.630401	0.603892	-0.346943	-0.957457	0.604348
E9PN17;O75964;Q7Z4Y8	E9PN17	ATP synthase subunit g. mitochondrial;ATP synthase subunit g 2. mitochondrial	ATP5L;ATP5L2	VPPTPAEIPRAIQSLKKIVNSAQTGSFKQLT	54	21.0166	19.0853	19.8798	20.1382	24.014	24.7187	22.471	22.2992	20.3421	24.6063	22.4843	18.7381	24.7786	23.5275	K	3	___2	1	6.62e-133			0.280443	0.746725	0.778928	0.621952	0.604721
P00505	P00505	Aspartate aminotransferase. mitochondrial	GOT2	YVLPSVRKAEAQIAAKNLDKEYLPIGGLAEF	90	24.6152	19.5755	19.0692	18.3003	19.1874	21.3499	19.8791	19.6193	20.8011	20.2031	21.4154	22.0014	21.2115	21.8814	K	2	___1	1	4.87e-12			0.295772	0.738955	0.736657	0.645079	0.605504
A0A0U1RQX0;A0A096LPK7;A0A182DWF2;D3YTF8;A0A182DWF3;Q9NNW7-4;Q9NNW7-3;Q9NNW7-2;Q9NNW7	A0A0U1RQX0	Thioredoxin reductase 2. mitochondrial	TXNRD2	WAIGRVPDTRSLNLEKAGVDTSPDTQKILVD	72	20.0218	20.0119	19.5037	21.1546	22.3389	21.8803	22.0519	19.3457	20.0155	20.7925	20.2227	19.5423	21.2921	22.3832	K	2	___1	1	5.3e-42			0.451119	0.653108	-0.4813	-0.831076	0.606563
J3KN67;D6RGJ6;P06753	J3KN67;P06753	Tropomyosin alpha-3 chain	TPM3	EERSKQLEDELAAMQKKLKGTEDELDKYSEA	49	22.319	22.8749	22.4312	22.988	23.5211	23.7521	21.9891	22.9282	21.895	21.7527	24.0241	24.798	23.6213	23.9268	K	2	___1	1	2.51e-31			0.49302	0.636219	0.438671	0.867074	0.607752
K7EK07;P84243;K7EMV3;B4DEB1;K7ES00;P68431;Q16695;Q71DI3	K7EK07;P68431;Q16695;Q71DI3	Histone H3;Histone H3.3;Histone H3.1;Histone H3.1t;Histone H3.2	H3F3B;H3F3A;HIST1H3A;HIST3H3;HIST2H3A	KLPFQRLMREIAQDFKTDLRFQSSAVMALQE;KLPFQRLVREIAQDFKTDLRFQSAAIGALQE;KLPFQRLVREIAQDFKTDLRFQSSAVMALQE	80	24.547	20.0246	23.1178	25.1691	25.2961	24.7359	24.4261	25.3369	23.6263	25.0079	25.0669	22.9462	24.2467	25.2262	K	2	___1	1	2.23e-10			0.360244	0.713273	0.5915	0.730863	0.612232
P10606	P10606	Cytochrome c oxidase subunit 5B. mitochondrial	COX5B	SGTREDPNLVPSISNKRIVGCICEEDNTSVV	86	28.7744	23.1785	27.9596	25.2394	28.6755	29.3864	27.9934	28.9806	29.6378	29.3769	28.6452	26.9546	23.7743	29.9364	K	3	___1	1	7.08e-09			0.244201	0.773495	0.871228	0.56212	0.612697
Q8N335;C9JM46	Q8N335	Glycerol-3-phosphate dehydrogenase 1-like protein;Glycerol-3-phosphate dehydrogenase [NAD(+)]	GPD1L	SAVAKIIGNNVKKLQKFASTVKMWVFEETVN	33	19.5051	25.4664	24.8637	24.7214	24.051	25.5218	19.4	23.8366	19.8651	25.1392	24.8766	24.6351	25.6114	25.5492	K	2	___1	1	0.000359429			0.247134	0.771294	0.854829	0.5668	0.614813
P00505	P00505	Aspartate aminotransferase. mitochondrial	GOT2	KASAELALGENSEVLKSGRFVTVQTISGTGA	122	25.9387	23.9791	25.5635	26.1409	28.0857	28.3848	27.9229	26.8235	26.8516	28.5865	26.8341	25.2978	27.4445	28.4731	K	2	___1	1	8.57e-240			0.340561	0.716716	0.613644	0.704402	0.61804
A0A0D9SGD3;Q6P1N9-2;Q6P1N9;E5RGF2;E5RG17;E5RG62;E5RK70;H0YBX2;G5EA19;U3KQS5	A0A0D9SGD3	Putative deoxyribonuclease TATDN1	TATDN1	LDFDRLQFCPKDTQLKYFEKQFELSEQTKLP	76	21.467	20.371	21.2211	21.5328	22.3848	22.4868	21.9768	23.8714	21.6618	23.6711	21.8982	19.075	22.9318	22.5042	K	2	___1	1	0.000369824			0.349972	0.710752	0.596172	0.716249	0.618524
A0A0U1RRL8;Q8TB22-3;Q8TB22;Q8TB22-2	A0A0U1RRL8	Spermatogenesis-associated protein 20	SPATA20	VLGQDRLINYATNGAKFLKRHMFDVASGRLM	537	21.8623	20.2152	21.2646	19.5152	22.5957	23.156	20.9025	23.4495	19.3607	25.453	23.0694	17.4298	23.9788	22.1473	K	2	___1	1	8.63e-19			0.269007	0.754069	0.768143	0.60141	0.62139
P01024;M0R0Q9	P01024	Complement C3;Complement C3 beta chain;C3-beta-c;Complement C3 alpha chain;C3a anaphylatoxin;Acylation stimulating protein;Complement C3b alpha' chain;Complement C3c alpha' chain fragment 1;Complement C3dg fragment;Complement C3g fragment;Complement C3d fragment;Complement C3f fragment;Complement C3c alpha' chain fragment 2	C3	YALAQMGRLKGPLLNKFLTTAKDKNRWEDPG	1209	17.3999	17.794	24.0276	23.9414	23.3041	22.7067	20.5929	21.4754	18.9197	19.4801	23.2453	19.686	19.1734	22.2953	K	2	___1	1	0.000636823			0.262701	0.758009	-0.784485	-0.591284	0.622178
P04406;P04406-2;E7EUT5	P04406	Glyceraldehyde-3-phosphate dehydrogenase	GAPDH	RLEKPAKYDDIKKVVKQASEGPLKGILGYTE	263	20.0651	21.7174	19.7866	19.7049	21.2497	20.2376	20.0423	19.3533	18.4583	21.3178	20.0431	21.4623	19.1265	19.4432	K	2	___1	0.999967	0.00185916			0.400806	0.687802	-0.514157	-0.773953	0.622189
E9PN17;O75964;Q7Z4Y8	E9PN17	ATP synthase subunit g. mitochondrial;ATP synthase subunit g 2. mitochondrial	ATP5L;ATP5L2	PPTPAEIPRAIQSLKKIVNSAQTGSFKQLTV	55	21.0166	20.2276	18.6701	19.8015	24.014	24.7187	22.471	22.2992	19.3901	24.6063	22.4843	19.3313	24.7786	23.5275	K	3	___2	1	6.62e-133			0.262317	0.757789	0.7854	0.590655	0.622267
P40227;P40227-2	P40227	T-complex protein 1 subunit zeta	CCT6A	FIEKCNNPRSVTLLIKGPNKHTLTQIKDAVR	377	23.1014	19.2153	22.0782	23.8466	22.8914	23.075	22.7035	22.258	19.5637	22.8739	19.2317	23.3258	22.6867	22.9123	K	2	___1	1	0.000155146			0.355211	0.712628	-0.5799	-0.721628	0.622319
A0A0A0MSE2;A0A0D9SFP2;E9PF18;Q16836;Q16836-3;Q16836-2;A0A1W2PNM1;A0A1W2PQV5;A0A1W2PQC2;A0A1W2PRT2;A0A1W2PQ78	A0A0A0MSE2	Hydroxyacyl-coenzyme A dehydrogenase. mitochondrial	HADH	PMTSQKTFESLVDFSKALGKHPVSCKDTPGF	202	21.9821	24.4483	24.0678	20.3443	24.2491	23.1913	23.1276	24.08	19.9111	26.796	26.7021	24.3191	25.4154	20.0588	K	3	___2	1	1.31e-57			0.243432	0.774195	0.838857	0.559316	0.624877
P05976	P05976	Myosin light chain 1/3. skeletal muscle isoform	MYL1	APAKPKEEKIDLSAIKIEFSKEQQDEFKEAF	44	21.5643	22.1084	22.2016	24.7201	24.2937	22.3645	21.6968	22.9261	19.6411	23.1567	24.8362	24.3371	23.9165	23.7257	K	2	___1	1	1.72e-12			0.396402	0.691566	0.512857	0.767668	0.626185
P31040-2;P31040;A0A087X1I3;P31040-3	P31040-2	Succinate dehydrogenase [ubiquinone] flavoprotein subunit. mitochondrial	SDHA	ADGSIRTSELRLSMQKSMQNHAAVFRVGSVL	469	19.8352	19.7169	19.1836	19.3401	22.1971	20.65	19.9215	21.4358	19.5298	20.0601	18.001	18.5804	19.5361	19.8594	K	3	___1	1	0.00146738			0.370342	0.71138	-0.548828	-0.738478	0.626248
Q6YN16;Q6YN16-2	Q6YN16	Hydroxysteroid dehydrogenase-like protein 2	HSDL2	KKVESTGAVPEFKEEKLQLQPKPRSGAVEET	298	20.8435	21.9837	17.664	20.9785	22.6452	22.1057	21.0095	23.2184	18.3526	20.2862	21.7151	23.2288	22.0391	22.7146	K	2	___1	1	0.00222388			0.328984	0.722196	0.617814	0.687096	0.626252
Q9UKX2;Q9UKX2-2;E7EX84	Q9UKX2	Myosin-2	MYH2	SERERIEAQNRPFDAKTSVFVAEPKESFVKG	35	20.4152	19.8808	21.8984	18.9172	19.6506	21.4643	20.5246	19.5876	23.7282	21.4447	21.8057	22.7961	18.4685	19.7406	K	3	___1	1	6.7e-14			0.294217	0.740323	0.688615	0.638583	0.627188
O00330-3;O00330	O00330-3	Pyruvate dehydrogenase protein X component. mitochondrial	PDHX	TATGPRGIFTKEDALKLVQLKQTGKITESRP	203	23.0135	21.1567	24.8091	24.4791	25.6687	24.1351	24.2958	23.6856	19.4324	19.4078	24.7495	26.2083	24.1544	25.433	K	2	___1	1	9.31e-05			0.313051	0.735015	-0.640999	-0.664673	0.629991
P12883	P12883	Myosin-7	MYH7	NARIEDEQALGSQLQKKLKELQARIEELEEE	1106	26.0957	25.8352	24.1077	25.1735	25.2339	25.6191	25.1823	25.9527	24.4171	24.4326	23.8074	25.5086	25.2844	25.4063	K	2	___1	1	4.5e-268			0.574781	0.617087	-0.348328	-0.906708	0.630648
O60814;P57053;P62807;U3KQK0;Q99880;Q99877;Q93079;P58876;Q16778;Q8N257;P23527;Q6DRA6;Q6DN03	O60814;P62807;Q16778	Histone H2B type 1-K;Histone H2B type F-S;Histone H2B type 1-C/E/F/G/I;Histone H2B;Histone H2B type 1-L;Histone H2B type 1-N;Histone H2B type 1-H;Histone H2B type 1-D;Histone H2B type 2-E;Histone H2B type 3-B;Histone H2B type 1-O;Putative histone H2B type 2-D;Putative histone H2B type 2-C	HIST1H2BK;H2BFS;HIST1H2BC;HIST1H2BN;HIST1H2BL;HIST1H2BH;HIST1H2BD;HIST2H2BE;HIST3H2BB;HIST1H2BO;HIST2H2BD;HIST2H2BC	PAPKKGSKKAVTKAQKKDGKKRKRSRKESYS	24	22.9323	23.7642	22.8423	23.9989	21.0202	23.4891	20.044	25.6922	22.8427	22.1495	23.3878	20.4443	23.7142	23.9597	K	2	___2	1	5.36e-09			0.341588	0.716074	0.585628	0.702107	0.630894
P53597	P53597	Succinyl-CoA ligase [ADP/GDP-forming] subunit alpha. mitochondrial	SUCLG1	NPGECKIGIMPGHIHKKGRIGIVSRSGTLTY	192	25.6052	22.9662	24.0754	22.9772	24.2023	18.6414	21.5391	25.559	19.5969	24.8516	23.3685	23.4737	24.215	23.8868	K	3	___1	1	0.000126798			0.280974	0.746221	0.706386	0.617795	0.633175
A0A0A0MTS7;Q8WZ42-12;Q8WZ42-13;Q8WZ42-11;Q8WZ42-4;Q8WZ42-7;Q8WZ42-2;Q8WZ42;Q8WZ42-8;Q8WZ42-5;A0A0A0MRA3;Q8WZ42-3;Q8WZ42-10;Q8WZ42-9	A0A0A0MTS7	Titin	TTN	PKYDGGHKLTGYIVEKRDLPSKSWMKANHVN	22880	22.4376	20.5771	21.0232	20.2819	20.047	21.6398	20.663	20.939	18.7905	19.4162	20.9813	20.6363	21.6547	21.2034	K	2	___1	1	0.00345136			0.4536	0.657419	-0.435457	-0.819238	0.634566
P06732	P06732	Creatine kinase M-type;Creatine kinase M-type. N-terminally processed	CKM	VWVNEEDHLRVISMEKGGNMKEVFRRFCVGL	242	32.5491	28.1386	29.6496	30.2579	28.5876	30.0325	29.7767	31.7997	29.5556	28.9794	30.3625	29.4271	30.4666	30.9925	K	2	___1	1	2.31e-10			0.525255	0.634394	0.3702	0.870656	0.639073
P17540;P12532;P12532-2;F8WCN3	P17540	Creatine kinase S-type. mitochondrial;Creatine kinase U-type. mitochondrial	CKMT2;CKMT1A;CKMT1B	IWINEEDHTRVISMEKGGNMKRVFERFCRGL	276	32.5491	28.1386	29.6496	30.2579	28.5876	30.0325	29.7767	31.7997	29.5556	28.9794	30.3625	29.4271	30.4666	30.9925	K	2	___1	1	2.31e-10			0.525255	0.635364	0.3702	0.870656	0.639073
P08238	P08238	Heat shock protein HSP 90-beta	HSP90AB1	KENYKKFYEAFSKNLKLGIHEDSTNRRRLSE	438	18.3437	20.4075	18.6115	22.1152	21.1594	21.3781	19.5248	23.4531	19.4754	19.1261	22.0794	20.2861	20.7199	20.6455	K	3	___1	1	0.00162982			0.319698	0.730837	0.606472	0.671221	0.6399
P68104;A0A087WVQ9;P68104-2;Q5VTE0;Q05639	P68104;Q05639	Elongation factor 1-alpha 1;Putative elongation factor 1-alpha-like 3;Elongation factor 1-alpha 2	EEF1A1;EEF1A1P5;EEF1A2	RPTDKPLRLPLQDVYKIGGIGTVPVGRVETG	255	25.255	19.1528	24.2676	25.0314	25.6478	17.9295	22.0045	24.5871	18.3429	21.7628	25.5984	25.0566	24.5342	24.5106	K	2	___1	1	1.66e-106			0.263768	0.757759	0.729143	0.589785	0.642208
A0A0C4DFU2;P04179-4;P04179;F5H3C5;F5H4R2;A0A0C4DFU1;F5GYZ5;P04179-2;G8JLJ2	A0A0C4DFU2	Superoxide dismutase;Superoxide dismutase [Mn]. mitochondrial	SOD2	GELLEAIKRDFGSFDKFKEKLTAASVGVQGS	130	24.1581	23.4072	24.1283	20.4575	25.0755	24.2046	23.6797	25.1821	19.3705	26.7004	24.6347	23.9002	25.1558	24.9256	K	2	___2	1	2.09e-22			0.282284	0.747073	0.679771	0.617894	0.642852
A0A0A0MSE2;A0A0D9SFP2;E9PF18;Q16836;Q16836-3;Q16836-2;A0A1W2PNM1;A0A1W2PQV5;A0A1W2PQC2;A0A1W2PRT2;A0A1W2PQ78	A0A0A0MSE2	Hydroxyacyl-coenzyme A dehydrogenase. mitochondrial	HADH	VMKLVEVIKTPMTSQKTFESLVDFSKALGKH	192	21.9821	24.4483	24.0678	20.8289	24.2491	23.1913	23.1276	24.08	20.4837	26.796	26.7021	24.3191	25.4154	19.6486	K	3	___2	1	0			0.24114	0.774007	0.792829	0.552981	0.643899
Q9UJZ1-2;Q9UJZ1;A0A087WYB4	Q9UJZ1-2	Stomatin-like protein 2. mitochondrial	STOML2	AQTTMRSELGKLSLDKVFRVEAERRKRATVL	145	21.9229	23.7339	24.6318	24.7769	24.7831	25.7517	24.4506	25.2605	19.6333	25.014	25.7452	26.208	26.3604	26.2333	K	2	___1	1	0.000699038			0.303483	0.737942	0.629114	0.648053	0.64428
Q13642-5;Q5JXI2	Q13642-5	Four and a half LIM domains protein 1	FHL1	___MASHRHSGPSSYKVGTMAEKFDCHYCRD	13	25.3615	24.9507	23.4947	25.9009	25.8243	25.3504	23.9297	25.9236	22.2054	24.4986	25.9368	25.2329	20.9275	25.7782	K	3	___1	1	6.68e-75			0.309283	0.733631	-0.6156	-0.655858	0.645068
A0A087WT47;P19237;G3V4F8;G3V3L5	A0A087WT47	Troponin I. slow skeletal muscle	TNNI1	ITASRKLLLKSLMLAKAKECWEQEHEEREAE	25	27.8995	26.9845	27.8006	28.3202	28.2833	29.0849	28.6817	28.5198	26.1077	27.3966	28.2479	27.9282	28.661	28.3862	K	2	___1	1	0.00526939			0.733038	0.606751	-0.258186	-0.947778	0.646755
P06733;P06733-2;K7EM90	P06733	Alpha-enolase;Enolase	ENO1	ILGVSLAVCKAGAVEKGVPLYRHIADLAGNS	126	25.2932	21.9325	23.4395	25.4064	24.1921	24.7068	22.0831	24.6996	24.355	22.0169	24.8715	25.1586	24.5029	25.1284	K	2	___1	1	1.32e-09			0.35818	0.713156	0.525614	0.71675	0.64824
Q00872-10;Q00872-3;Q00872;Q00872-6;F8VZY0;Q00872-9;Q00872-8;F8VZE0;Q00872-5;Q00872-7;G3V1V7;Q00872-4;Q00872-2	Q00872-10;Q00872-4	Myosin-binding protein C. slow-type	MYBPC1	IDKTKFTITGLPTDAKIFVRVKAVNAAGASE	812	21.8967	19.6995	22.717	24.3255	24.0666	22.8093	21.9224	22.0587	19.9612	20.9329	24.6076	18.6909	23.3301	23.4794	K	2	___1	1	2.28e-05			0.299172	0.739846	-0.625171	-0.640675	0.650079
Q9Y305-3;Q9Y305-2;Q9Y305;Q9Y305-4;C9J7L8;H7C5Q2	Q9Y305-3	Acyl-coenzyme A thioesterase 9. mitochondrial	ACOT9	IEVLLPLGSEPELREKYLTVQNTVRFGRILE	43	25.6795	20.3182	23.0632	24.6405	24.9333	25.2171	24.5766	24.6782	26.1047	24.4299	24.9286	21.8001	25.6464	25.6058	K	2	___1	1	4.88e-13			0.274217	0.755414	0.680758	0.604324	0.650615
Q13423;E9PCX7	Q13423	NAD(P) transhydrogenase. mitochondrial	NNT	DFGTMGHVIRGTVVMKDGKVIFPAPTPKNIP	430	23.9503	20.5788	22.1246	20.0286	20.1342	19.7178	20.6073	24.1061	20.113	22.8398	19.3967	20.457	21.9073	20.9646	K	2	___1	1	0.00159341			0.489917	0.65	0.377557	0.836808	0.653173
A0A087WYS1;E7EUC7;Q16851;C9JQU9;Q16851-2;C9JNZ1;C9JVG3;C9JWG0;C9JTZ5;C9JUW1	A0A087WYS1;Q16851-2	UTP--glucose-1-phosphate uridylyltransferase	UGP2	GKIQRPPEDSIQPYEKIKARGLPDNISSVLN	91	23.2028	19.2267	19.9393	20.4079	20.6092	18.2717	19.5648	24.002	17.6838	18.979	21.3374	20.4746	20.5594	21.5296	K	3	___1	1	3.14e-06			0.385329	0.708462	0.477629	0.744415	0.654569
P04792;F8WE04	P04792	Heat shock protein beta-1	HSPB1	LDVNHFAPDELTVKTKDGVVEITGKHEERQD	114	19.3969	21.877	21.1666	22.7708	22.218	22.4526	19.7227	20.1663	20.4112	20.2193	21.4959	23.0396	21.2918	20.1877	K	2	___1	1	0.00161989			0.461233	0.659561	-0.398972	-0.814251	0.654607
P00915;E5RHP7;E5RH81;E5RFE7;H0YBE2;E5RJI8;E5RJF6	P00915	Carbonic anhydrase 1	CA1	ANPKLQKVLDALQAIKTKGKRAPFTNFDPST	169	26.2078	23.1627	27.296	27.7005	26.5846	27.1646	25.9737	25.3338	24.5774	26.4827	27.91	28.0794	27.3117	27.1409	K	2	___1	1	7e-07			0.468821	0.659048	0.392285	0.820105	0.654769
A2A274;Q99798	A2A274	Aconitate hydratase. mitochondrial	ACO2	LKFNPETDYLTGTDGKKFRLEAPDADELPKG	545	28.5992	23.6738	26.6176	25.9857	28.1205	29.0314	26.9127	28.8457	27.5402	29.3515	26.3491	25.8579	27.2112	28.0216	K	2	___1	1	1.01e-43			0.301997	0.740305	0.605186	0.643046	0.656502
P00558;P00558-2	P00558	Phosphoglycerate kinase 1	PGK1	NGVKITLPVDFVTADKFDENAKTGQATVASG	291	25.2564	23.802	25.9031	26.6736	26.0714	26.0839	25.1847	27.6986	24.3439	26.9963	27.8368	24.3467	24.9621	26.1149	K	2	___1	1	4.57e-73			0.382566	0.710768	0.474886	0.740009	0.65815
P12883	P12883	Myosin-7	MYH7	AKLFDNHLGKSANFQKPRNIKGKPEAHFSLI	565	26.3531	26.6846	24.8823	25.7517	24.9088	26.063	25.0737	25.6951	25.6901	24.6888	25.3828	25.3288	25.8418	25.2708	K	2	___1	1	0.00410704			0.693197	0.612398	-0.259857	-0.922375	0.660493
P40926;P40926-2;G3XAL0	P40926	Malate dehydrogenase. mitochondrial;Malate dehydrogenase	MDH2	EKMISDAIPELKASIKKGEDFVKTLK_____	328	21.2175	24.0925	26.8457	25.0993	25.8637	26.1973	25.3207	24.8753	24.4682	29.232	25.9986	22.4321	27.7238	24.2245	K	2	___2	1	6.45e-09			0.292011	0.74248	0.616829	0.628175	0.660509
P40926;P40926-2;G3XAL0	P40926	Malate dehydrogenase. mitochondrial;Malate dehydrogenase	MDH2	SSFEEKMISDAIPELKASIKKGEDFVKTLK_	324	21.2175	24.0925	26.8457	25.0993	25.8637	26.1973	25.3207	24.8753	24.4682	29.232	25.9986	22.4321	27.7238	24.2245	K	3	___2	1	3.41e-32			0.292011	0.743391	0.616829	0.628175	0.660509
P42765;A0A0B4J2A4;K7EME0	P42765	3-ketoacyl-CoA thiolase. mitochondrial	ACAA2	VDEHARPQTTLEQLQKLPPVFKKDGTVTAGN	234	24.3451	25.4098	27.0727	26.0342	27.0399	27.1011	26.7131	25.09	25.8213	28.6932	26.9589	25.4586	27.8924	26.5323	K	4	___1	1	4.3e-229			0.452643	0.668023	0.390114	0.800599	0.665913
P11217;P11217-2	P11217	Glycogen phosphorylase. muscle form	PYGM	REWTRMVIRNIATSGKFSSDRTIAQYAREIW	811	26.4705	23.3091	28.1732	28.4142	27.4629	28.5866	28.3471	28.8285	26.7588	27.9201	28.9992	25.2454	28.2651	28.5344	K	2	___1	1	5.07e-13			0.326203	0.730691	0.541129	0.67224	0.666012
P13804;H0YLU7;H0YKF0;J3KN60	P13804	Electron transfer flavoprotein subunit alpha. mitochondrial	ETFA	ATRLGGEVSCLVAGTKCDKVAQDLCKVAGIA	59	19.8724	19.6154	20.3565	18.5379	19.4183	20.4613	18.4786	19.4853	18.0789	19.5463	19.2893	21.6775	21.0692	20.9696	K	2	___1	1	7.01e-06			0.364369	0.712199	0.482243	0.716721	0.667246
P13639	P13639	Elongation factor 2	EEF2	GTITTFEHAHNMRVMKFSVSPVVRVAVEAKN	498	18.1676	20.0272	20.0018	22.8857	23.3003	22.4791	22.0821	23.5558	20.0892	21.7611	22.6426	20.3153	22.2959	22.7503	K	2	___1	1	0.0013103			0.274822	0.755622	0.638057	0.601771	0.667803
P12883	P12883	Myosin-7	MYH7	KLQTENGELSRQLDEKEALISQLTRGKLTYT	1294	24.956	20.8758	24.2696	24.014	19.9791	24.5954	24.1455	25.4485	19.9255	22.4384	25.7382	22.3708	25.2071	24.9933	K	2	___1	1	4.06e-192			0.36986	0.711886	0.469486	0.721397	0.670434
Q13825;Q13825-2	Q13825	Methylglutaconyl-CoA hydratase. mitochondrial	AUH	ELALACDIRVAASSAKMGLVETKLAIIPGGG	204	23.0222	23.2337	26.3544	24.6941	27.005	26.9234	25.6889	24.4633	20.35	27.4351	27.2589	18.9947	27.236	25.8301	K	3	___2	1	5.45e-81			0.224952	0.787307	-0.7648	-0.521826	0.672909
Q13642-5;Q13642-4;Q13642-1	Q13642-5	Four and a half LIM domains protein 1	FHL1	DYCFHCKKCSVNLANKRFVFHQEQVYCPDCA	278	20.5224	18.6457	18.981	20.2151	19.8634	19.0425	20.412	22.0888	20.6699	19.3646	20.9357	19.2447	20.7018	18.0507	K	2	___1	1	0.0044189			0.356141	0.7166	0.482014	0.705151	0.673496
E7EPM6;P33121-3;P33121;P33121-2;B7Z3Z9	E7EPM6	Long-chain-fatty-acid--CoA ligase 1	ACSL1	NRMFDRIFGQANTTLKRWLLDFASKRKEAEL	352	20.1023	19.3433	19.4066	19.8713	21.9467	19.4873	20.7826	21.6838	19.5535	19.2988	20.0519	20.8185	21.7786	20.6257	K	2	___1	1	1.81e-07			0.417319	0.692006	0.4101	0.766058	0.674307
B4DJV2;O75390;A0A0C4DGI3	B4DJV2	Citrate synthase;Citrate synthase. mitochondrial	CS	LTQLQKEVGKDVSDEKLRDYIWNTLNSGRVV	314	23.8344	19.6862	20.6096	19.4902	21.6039	23.0232	18.5744	27.0082	19.6621	24.0709	20.2323	17.4815	23.1663	19.5856	K	2	___2	1	1.5e-05			0.272407	0.755396	0.626429	0.596669	0.675082
A0A0A0MSE2;A0A0D9SFP2;E9PF18;Q16836;Q16836-3;Q16836-2;A0A1W2PNM1;A0A1W2PQ78	A0A0A0MSE2	Hydroxyacyl-coenzyme A dehydrogenase. mitochondrial	HADH	VAENKFGKKTGEGFYKYK_____________	315	24.0245	18.7105	22.7086	22.4986	23.9968	23.9964	22.6194	24.5609	22.4371	23.2984	24.0303	21.0238	23.2121	23.9323	K	2	___1	1	0.00234281			0.301131	0.741074	0.562871	0.636585	0.676865
P11217;P11217-2	P11217	Glycogen phosphorylase. muscle form	PYGM	YEDYIKCQEKVSALYKNPREWTRMVIRNIAT	793	28.3206	23.4769	27.498	27.3867	26.3049	27.7659	23.4057	28.6929	22.2808	27.2059	27.6169	26.6339	27.862	27.269	K	2	___1	1	0.000362208			0.348301	0.719133	0.4861	0.6949	0.677159
Q96DG6	Q96DG6	Carboxymethylenebutenolidase homolog	CMBL	LGREVQVEHIKAYVTKSPVDAGKAVIVIQDI	36	26.826	26.8309	26.53	26.8681	25.4061	26.0584	25.9547	22.8249	26.1266	26.4983	26.6729	26.2366	25.6103	27.012	K	2	___1	1	1.33e-09			0.336938	0.726675	-0.498943	-0.681021	0.679028
P61081	P61081	NEDD8-conjugating enzyme Ubc12	UBE2M	________MIKLFSLKQQKKEEESAGGTKGS	8	18.919	19.3341	21.1151	21.6005	22.2554	21.8868	20.8313	20.0361	18.9387	20.0673	21.9131	21.7155	18.2683	21.6233	K	2	___1	1	0.00165109			0.347105	0.72084	-0.482843	-0.692527	0.679834
P42126-2;P42126	P42126-2	Enoyl-CoA delta isomerase 1. mitochondrial	ECI1	RVLVEPDAGAGVAVMKFKNPPVNSLSLEFLT	61	25.1485	24.8632	26.3024	24.128	27.6767	26.9298	26.9772	26.2568	22.7208	28.5168	27.2038	26.0431	27.9622	27.0696	K	3	___1	1	1.95e-16			0.312776	0.737511	0.535328	0.65092	0.680083
P10768;X6RA14	P10768	S-formylglutathione hydrolase	ESD	QKVFEHDSVELNCKMKFAVYLPPKAETGKCP	31	18.2649	20.8822	22.9501	23.6633	23.3529	23.8159	22.9818	20.8527	18.9959	23.7587	23.36	19.3114	23.1633	22.5548	K	2	___1	1	0.0011155			0.299309	0.740655	-0.559186	-0.633236	0.680191
P11277-2;P11277;P11277-3	P11277-2	Spectrin beta chain. erythrocytic	SPTB	AIQGDKVKAITAATLKFTEGKGYQPCDPQVI	593	18.2918	19.9178	22.3348	23.2598	22.2871	21.6835	22.6348	19.489	19.4416	21.5774	22.402	19.1752	22.4464	22.7152	K	2	___1	1	4.51e-24			0.369647	0.713906	-0.451829	-0.716803	0.680743
O75947;O75947-2;F5H608	O75947	ATP synthase subunit d. mitochondrial	ATP5H	NPPAIDWAYYKANVAKAGLVDDFEKKFNALK	63	29.6862	27.798	29.7833	30.1985	31.8391	31.0005	30.515	29.9523	31.0911	30.2072	29.4934	31.4203	30.6225	31.1234	K	3	___1	1	3.54e-74			0.376847	0.712897	0.441371	0.723761	0.681821
O00330-3;O00330;E9PLU0;E9PRI6	O00330-3	Pyruvate dehydrogenase protein X component. mitochondrial	PDHX	SEPRPSPEPQISIPVKKEHIPGTLRFRLSPA	157	22.9759	19.6718	21.9585	21.8366	22.3919	21.3422	20.1108	22.9564	22.595	19.25	18.1024	22.4657	19.2262	21.5002	K	2	___1	1	1.33e-27			0.276676	0.753442	-0.598828	-0.601149	0.68284
P21796	P21796	Voltage-dependent anion-selective channel protein 1	VDAC1	VNNSSLIGLGYTQTLKPGIKLTLSALLDGKN	252	22.2161	23.9342	21.3991	24.6306	24.5407	23.61	23.2587	21.9933	20.797	24.0439	23.4307	20.217	23.4974	25.2764	K	3	___1	1	2.7e-59			0.266479	0.759896	-0.6191	-0.586019	0.683947
Q13825;Q13825-2	Q13825	Methylglutaconyl-CoA hydratase. mitochondrial	AUH	IRVAASSAKMGLVETKLAIIPGGGGTQRLPR	211	23.0222	23.2337	26.3544	24.6941	27.005	26.9234	25.6889	24.4633	19.7668	27.4351	27.2589	19.8533	27.236	25.8301	K	3	___2	1	1.05e-69			0.226929	0.788573	-0.725457	-0.523546	0.684499
P10809	P10809	60 kDa heat shock protein. mitochondrial	HSPD1	NEDQKIGIEIIKRTLKIPAMTIAKNAGVEGS	473	27.2938	28.3409	28.4108	28.2021	29.4897	29.3719	29.3686	28.931	26.4111	30.0971	28.9145	29.0695	29.8369	30.179	K	2	___1	1	5.53e-07			0.388071	0.71117	0.423042	0.733295	0.68522
Q08257-3;Q08257;A6NP24;Q08257-2	Q08257-3	Quinone oxidoreductase	CRYZ	GAHEVFNHREVNYIDKIKVVGSRGTIEINPR	208	22.4395	19.5815	18.6456	22.4762	20.9182	24.0846	22.1098	24.353	19.8899	22.6734	22.0254	19.4946	22.2931	23.3669	K	2	___1	1	0.00219902			0.29863	0.742775	0.5487	0.630801	0.685711
G3V1N2;P69905	G3V1N2;P69905	Hemoglobin subunit alpha	HBA2;HBA1	SLDKFLASVSTVLTSKYR_____________	140	24.7021	25.5606	26.7148	26.469	24.8383	25.9713	23.8143	24.2835	24.018	26.574	27.191	26.631	27.5196	24.6964	K	2	___1	1	7.04e-68			0.401277	0.709071	0.406157	0.744757	0.687098
Q60FE5;P21333-2;P21333;Q5HY54;A0A087WWY3;F8WE98;Q14315-2;Q14315	Q60FE5;Q14315-2	Filamin-A;Filamin-C	FLNA;FLNC	ADFKVFTKGAGSGELKVTVKGPKGTEEPVKV;ADFKVYTKGAGSGELKVTVKGPKGEERVKQK	510	20.8534	22.726	22.1874	22.5589	21.5157	22.0361	22.5437	20.1584	21.6266	21.8524	22.1567	21.7244	22.4056	22.6657	K	2	___1	1	0.00207347			0.621801	0.637975	-0.261629	-0.871833	0.687573
P00558;P00558-2;P07205	P00558;P07205	Phosphoglycerate kinase 1;Phosphoglycerate kinase 2	PGK1;PGK2	KAEPAKIEAFRASLSKLGDVYVNDAFGTAHR;KAEPDKIEAFRASLSKLGDVYVNDAFGTAHR	156	26.366	24.4277	17.5874	25.047	24.0996	24.5156	20.1377	26.4136	21.8196	25.6299	25.4322	21.4158	22.9687	23.9294	K	3	___1	1	1.29e-41			0.209033	0.804283	0.775457	0.492299	0.6885
P08559;P08559-2;P08559-4;P08559-3;Q5JPU3	P08559	Pyruvate dehydrogenase E1 component subunit alpha. somatic form. mitochondrial	PDHA1	EIQEVRSKSDPIMLLKDRMVNSNLASVEELK	321	24.442	26.233	27.7173	26.8841	27.8819	27.6521	27.7497	26.2244	26.2049	29.2862	26.5869	27.3036	28.265	27.25	K	2	___2	1	3.78e-14			0.442513	0.687021	0.365843	0.778357	0.688827
P08559;P08559-2;P08559-4;P08559-3;Q5JPU3	P08559	Pyruvate dehydrogenase E1 component subunit alpha. somatic form. mitochondrial	PDHA1	GVSYRTREEIQEVRSKSDPIMLLKDRMVNSN	313	24.442	26.233	27.7173	26.8841	27.8819	27.6521	27.7497	26.2244	26.2049	29.2862	26.5869	27.3036	28.265	27.25	K	2	___2	1	3.78e-14			0.442513	0.686045	0.365843	0.778357	0.688827
P18206-2;P18206	P18206-2	Vinculin	VCL	ANFENHSGKLGATAEKAAAVGTANKSTVEGI	646	21.8633	22.4142	21.8024	22.5666	21.6107	22.0909	20.5596	21.5574	20.9895	20.8117	22.1337	18.2408	22.369	23.2129	K	2	___1	1	3.26e-46			0.314887	0.73684	-0.513243	-0.650732	0.689265
P12883	P12883	Myosin-7	MYH7	ASMKEEFTRLKEALEKSEARRKELEEKMVSL	865	27.8812	23.732	23.9549	24.6868	24.4664	25.539	25.0986	27.1363	23.9747	23.7061	24.3566	24.7008	24.6963	25.1486	K	2	___1	1	0.000736304			0.678152	0.632228	-0.234215	-0.877919	0.693692
P14621;U3KQL2;U3KPX8	P14621	Acylphosphatase-2	ACYP2	GSPSSRIDRTNFSNEKTISKLEYSNFSIRY_	85	23.3461	24.7116	24.1919	24.2909	24.3725	24.1222	18.457	24.7243	22.4247	23.7363	24.6016	24.1535	23.879	24.2161	K	2	___1	1	9.79e-08			0.261095	0.765604	0.606186	0.575738	0.694589
Q9UHQ9;H7C0R7	Q9UHQ9	NADH-cytochrome b5 reductase 1	CYB5R1	YVDLVIKVYLKGVHPKFPEGGKMSQYLDSLK	124	24.6652	19.5399	22.8001	23.2683	23.9326	23.8092	23.394	25.1076	23.2043	23.5626	23.9966	23.5409	21.1416	24.4798	K	3	___1	1	0.000538873			0.305682	0.741105	0.517728	0.637388	0.694608
Q14315-2;Q14315	Q14315-2	Filamin-C	FLNC	GLQPKGVRVKEVADFKVFTKGAGSGELKVTV	498	21.3387	21.2207	21.8307	23.1693	19.1291	23.0335	20.6412	23.2353	19.262	19.2409	20.0697	21.0325	19.9656	23.2493	K	2	___1	1	0.00317769			0.254942	0.770931	-0.615414	-0.566039	0.696794
Q14315-2;Q14315	Q14315-2	Filamin-C	FLNC	IDFDIIKNDNDTFTVKYTPPGAGRYTIMVLF	832	21.9863	20.3138	21.2441	20.9596	18.9088	22.3057	18.4862	22.0827	20.1529	17.5897	20.6759	19.2541	21.0317	20.0766	K	2	___1	1	5.96e-33			0.327285	0.73622	-0.477271	-0.66283	0.697905
P11277-2;P11277;P11277-3;H0YJE6	P11277-2	Spectrin beta chain. erythrocytic	SPTB	DACAGRRTQLVDTADKFRFFSMARDLLSWME	1905	19.0763	19.651	21.3461	22.3665	21.9642	22.7706	21.6657	21.9307	21.5959	20.597	21.5244	21.3753	22.6949	22.237	K	2	___1	1	0.000245862			0.350906	0.722183	0.444972	0.689449	0.698002
P40926;P40926-2;G3XAL0	P40926	Malate dehydrogenase. mitochondrial;Malate dehydrogenase	MDH2	SSFEEKMISDAIPELKASIKKGEDFVKTLK_	324	28.6465	28.2928	32.5573	31.9696	33.4154	31.8829	32.6158	29.6714	30.2112	33.9463	32.5479	30.3569	32.8555	33.1	K	3	___1	1	3.41e-32			0.325745	0.734947	0.4727	0.659697	0.701489
P06732	P06732	Creatine kinase M-type;Creatine kinase M-type. N-terminally processed	CKM	VQLVVDGVKLMVEMEKKLEKGQSIDDMIPAQ	365	28.6793	27.2415	27.7214	28.8497	28.5192	28.5758	28.0479	29.1474	25.9695	27.883	28.8574	27.6551	27.862	28.2511	K	2	___1	1	0.00055825			0.535873	0.656351	-0.287043	-0.824742	0.701748
P04406;P04406-2;E7EUT5	P04406	Glyceraldehyde-3-phosphate dehydrogenase	GAPDH	NVSVVDLTCRLEKPAKYDDIKKVVKQASEGP	254	31.8602	27.5095	30.2247	30.7738	30.1169	30.9979	30.7766	31.2822	28.5996	30.627	30.87	29.024	29.1726	30.1933	K	2	___1	1	0.00146841			0.431394	0.695008	-0.355843	-0.7611	0.70225
V9GYG9;V9GYM3;P02652;V9GYE3	V9GYG9	Apolipoprotein A-II;Proapolipoprotein A-II;Truncated apolipoprotein A-II	APOA2	KSYFEKSKEQLTPLIKKAGTELVNFLSYFVE	77	24.8641	24.1934	24.6199	26.3152	24.9809	24.4373	18.9275	23.8262	24.6741	21.9817	24.5882	26.172	25.7783	26.0941	K	2	___1	1	0.0044189			0.224484	0.79191	0.682329	0.516701	0.702794
P02794;G3V192;E9PRK8;E9PKY7	P02794	Ferritin heavy chain;Ferritin heavy chain. N-terminally processed;Ferritin	FTH1	LHQSHEEREHAEKLMKLQNQRGGRIFLQDIK	72	21.9425	23.0922	21.9864	22.1384	22.5247	21.4186	20.4064	23.6246	20.6767	21.1714	21.7789	26.0354	22.5112	21.2895	K	2	___1	1	0.00147772			0.296037	0.746746	0.511214	0.621505	0.705767
P01008;CON__P41361	P01008	Antithrombin-III	SERPINC1	LVLVNTIYFKGLWKSKFSPENTRKELFYKAD	260	21.6263	22.1272	22.3386	22.4869	18.2105	19.1334	19.3663	22.6944	20.3537	20.1069	21.7183	20.9083	21.8059	21.4607	K	2	___1	1	0.00221738			0.279596	0.753838	0.537	0.598992	0.707713
P12882;Q9UKX2;Q9Y623	P12882;Q9UKX2;Q9Y623	Myosin-1;Myosin-2;Myosin-4	MYH1;MYH2;MYH4	KNLTEEMAGLDETIAKLTKEKKALQEAHQQT	997	22.9852	19.1089	23.462	24.2613	23.2058	21.8455	20.1762	24.4419	19.4513	24.5595	24.7042	23.0944	18.7736	23.6023	K	3	___1	1	1.85e-94			0.288178	0.75025	0.511757	0.609298	0.71207
Q9UIJ7;Q9UIJ7-3;Q9UIJ7-2	Q9UIJ7	GTP:AMP phosphotransferase AK3. mitochondrial	AK3	IDDLTGEPLIQREDDKPETVIKRLKAYEDQT	165	27.1808	24.9032	24.5302	24.4763	26.1655	26.9408	25.8654	28.8083	23.2371	26.8088	25.5604	25.6023	26.8808	26.0864	K	3	___1	1	9.47e-49			0.351906	0.72412	0.417415	0.683822	0.713033
Q06830;A0A0A0MSI0;A0A0A0MRQ5	Q06830	Peroxiredoxin-1	PRDX1	_________MSSGNAKIGHPAPNFKATAVMP	7	26.1109	20.9286	27.031	28.2552	26.7112	22.8557	27.3895	26.3636	25.7415	26.2859	27.6336	26.5343	27.1319	24.0085	K	3	___1	1	2.84e-101			0.230514	0.788836	0.631029	0.524391	0.715384
P09622;E9PEX6;P09622-3;P09622-2	P09622	Dihydrolipoyl dehydrogenase. mitochondrial;Dihydrolipoyl dehydrogenase	DLD	QRILQKQGFKFKLNTKVTGATKKSDGKIDVS	277	26.9358	26.3496	25.7311	26.6427	26.348	26.5257	25.0498	27.9345	25.0701	26.6218	26.2423	27.1609	26.3501	26.6625	K	2	___1	1	4.07e-11			0.409988	0.712127	0.351357	0.734315	0.717708
Q13061;H9ME53;Q13061-3;Q13061-2	Q13061	Triadin	TRDN	NFSASSIAKIGSDPLKLVRDAMEETTDWIYG	90	19.868	19.308	20.8492	21.511	21.5049	21.3238	21.0744	21.3954	19.5652	21.5606	21.5709	20.1535	21.0544	22.6185	K	2	___1	1	8.43e-05			0.402064	0.713692	0.354171	0.726174	0.720444
K7EK07;P84243;K7EMV3;B4DEB1;K7ES00;K7EP01	K7EK07	Histone H3;Histone H3.3	H3F3B;H3F3A	ATKAARKSAPSTGGVKKPHRYRPGTVALREI	37	22.3176	20.078	18.876	20.2834	20.5548	18.0039	19.081	20.0713	20.4339	20.0726	20.1604	20.0511	20.6814	20.9113	K	2	___2	1	0.00686815			0.311801	0.740588	0.455329	0.635869	0.721154
O43252	O43252	Bifunctional 3'-phosphoadenosine 5'-phosphosulfate synthase 1;Sulfate adenylyltransferase;Adenylyl-sulfate kinase	PAPSS1	WNDGLDQYRLTPTELKQKFKDMNADAVFAFQ	404	19.5322	20.8155	22.4647	22.2353	23.2344	24.3067	23.2836	22.9517	19.9336	24.614	22.7639	21.6878	23.5197	23.7442	K	2	___1	1	0.00144716			0.297265	0.747801	0.4775	0.61809	0.721201
P26641;P26641-2	P26641	Elongation factor 1-gamma	EEF1G	PFAHLPKSTFVLDEFKRKYSNEDTLSVALPY	294	22.0496	18.4879	22.6233	23.7501	24.0977	23.2904	22.9529	22.3322	19.5493	22.9314	23.7623	17.7958	23.2087	23.6099	K	2	___1	1	6.54e-07			0.244488	0.778731	-0.580329	-0.545005	0.721301
Q9P2R7-2;Q9P2R7;Q5T9Q5;Q5T9Q8;A0A0U1RRI1	Q9P2R7-2	Succinyl-CoA ligase [ADP-forming] subunit beta. mitochondrial	SUCLA2	PEAIIKEPIDIEEGIKKEQALQLAQKMGFPP	193	19.3717	22.1194	22.1495	21.1642	24.0537	23.3811	19.7436	25.647	23.5518	26.2488	19.7063	18.9309	22.5515	20.3249	K	2	___1	1	0.00045103			0.198482	0.811338	0.711143	0.46941	0.722521
A0A0J9YXN7;Q96Q06-2;Q96Q06	A0A0J9YXN7;Q96Q06-2	Perilipin-4	PLIN4	RDTLAQLQDCFRLIEKAQQAPEGQPRLDQGS	1289	19.6792	22.7393	22.0497	22.5809	20.5949	21.7484	20.211	19.8558	20.9635	19.5854	21.6526	21.5594	21.5157	21.5511	K	2	___1	1	5.66e-16			0.338102	0.735846	-0.417129	-0.664873	0.722717
A0A0A0MTS7;Q8WZ42-12;Q8WZ42-13;Q8WZ42-11;Q8WZ42-4;Q8WZ42-7;Q8WZ42-2;Q8WZ42;Q8WZ42-8;Q8WZ42-5	A0A0A0MTS7	Titin	TTN	TSAELRIEAEPIQFTKRIQNIVVSEHQSATF	10082	22.6916	20.7848	21.398	22.8193	22.8368	23.5048	22.3864	21.307	23.3962	20.7771	21.2971	20.3405	22.5292	23.4801	K	2	___1	1	2.11e-06			0.299071	0.747674	-0.470643	-0.619666	0.723177
F2Z337;P02144;B0QYF8;F2Z2F1	F2Z337;P02144	Myoglobin	MB	EVLIRLFKGHPETLEKFDKFKHLKSEDEMKA	43	33.6491	29.579	30.2702	30.8687	31.3541	31.0064	30.2393	34.0391	29.0478	31.7056	31.6645	30.8984	30.5013	31.2882	K	3	___1	1	1.31e-07			0.452251	0.694657	0.311157	0.760562	0.723234
P00558;P00558-2	P00558	Phosphoglycerate kinase 1	PGK1	ERPFLAILGGAKVADKIQLINNMLDKVNEMI	220	24.4605	23.6166	26.3099	28.0854	26.7212	26.6213	27.61	25.5974	25.1565	22.4437	27.7475	26.0902	26.1238	26.9779	K	2	___1	1	2.5e-19			0.298764	0.747455	-0.4697	-0.619038	0.723886
J3KN67;D6RGJ6;P06753;P09493;H0YL52;H0YKP3;A0A087WTJ7;P09493-4;P09493-10;P09493-9;Q6ZN40	J3KN67;P06753;P09493;P09493-4;P09493-9;Q6ZN40	Tropomyosin alpha-3 chain;Tropomyosin alpha-1 chain	TPM3;TPM1	AAMQKKLKGTEDELDKYSEALKDAQEKLELA;VSLQKKLKGTEDELDKYSEALKDAQEKLELA	60	26.1904	24.5011	24.5375	26.5639	24.3736	25.1487	24.4302	26.5233	25.1733	24.8865	25.8066	25.8999	23.8329	26.205	K	2	___1	1	8.2e-147			0.38012	0.717457	0.368871	0.705248	0.724077
P00558;P00558-2	P00558	Phosphoglycerate kinase 1	PGK1	EAFARGTKALMDEVVKATSRGCITIIGGGDT	361	24.815	21.7423	25.9865	26.5454	25.4374	26.9617	25.8857	25.827	23.4568	26.5535	26.6175	24.458	26.0091	26.8952	K	2	___1	1	4.63e-30			0.39464	0.710829	0.349014	0.715166	0.728224
P54652	P54652	Heat shock-related 70 kDa protein 2	HSPA2	KNQVAMNPTNTIFDAKRLIGRKFEDATVQSD	72	20.3444	20.4522	21.3895	19.1803	20.9258	21.32	18.1891	20.328	19.9226	21.4891	21.4862	20.4538	20.8926	19.805	K	2	___1	1	6.15e-37			0.374257	0.719747	0.368	0.697604	0.728238
P31930	P31930	Cytochrome b-c1 complex subunit 1. mitochondrial	UQCRC1	KLSRADLTEYLSTHYKAPRMVLAAAGGVEHQ	225	25.7057	18.6578	19.1219	21.7678	22.6047	23.414	19.3571	25.4755	18.5791	24.5243	22.1158	19.4652	22.5214	22.1114	K	3	___1	1	3.29e-19			0.231409	0.787892	0.594815	0.523337	0.728374
P55072	P55072	Transitional endoplasmic reticulum ATPase	VCP	QELVQYPVEHPDKFLKFGMTPSKGVLFYGPP	505	20.2823	20.8681	21.2103	22.7311	22.8697	21.4247	22.2787	23.1752	19.992	21.8672	22.82	21.1801	22.5743	23.027	K	2	___1	1	0.0082005			0.323039	0.739464	0.424414	0.645553	0.729286
P49748;P49748-3;P49748-2;K7EQP4;J3QKU9	P49748	Very long-chain specific acyl-CoA dehydrogenase. mitochondrial	ACADVL	AHQSIGFKGILLFGTKAQKEKYLPKLASGET	195	21.3704	21.0472	19.8534	19.4332	24.2757	25.2204	17.5656	21.7938	19.9018	25.5592	20.2501	19.2552	23.5942	23.4527	K	2	___1	1	0.00354933			0.189366	0.821088	0.720157	0.452139	0.730511
P30041	P30041	Peroxiredoxin-6	PRDX6	VTARVVFVFGPDKKLKLSILYPATTGRNFDE	144	23.948	19.4408	24.9341	26.2824	24.8403	25.8133	24.849	24.9011	19.4867	19.357	25.6479	25.4986	25.9596	25.523	K	2	___1	1	6.44e-20			0.252162	0.774364	-0.533428	-0.553495	0.733651
C9JZN9;P45378-4	C9JZN9	Troponin T. fast skeletal muscle	TNNT3	KYDIMNVRARVQMLAKFSKKAGTPAKGKVGG	221	19.0721	18.7755	24.5858	24.2705	22.8823	23.5493	23.9537	20.4611	20.9334	22.9066	24.4342	23.0769	24.8324	23.2142	K	2	___1	1	0.00206789			0.336994	0.733757	0.395657	0.657667	0.735641
Q5QNZ2;P24539	Q5QNZ2	ATP synthase F(0) complex subunit B1. mitochondrial	ATP5F1	KQASIQHIQNAIDTEKSQQALVQKRHYLFDV	93	27.8492	23.9878	23.0156	22.5173	25.4092	24.5071	23.4705	28.5567	23.9921	25.4473	24.18	23.6831	23.5708	24.213	K	3	___1	1	5.73e-179			0.321838	0.740394	0.412328	0.640997	0.736711
O14561;I3L505	O14561	Acyl carrier protein. mitochondrial;Acyl carrier protein	NDUFAB1	PLTLEGIQDRVLYVLKLYDKIDPEKLSVNSH	88	27.9783	25.2304	27.9777	28.1361	28.8239	28.6544	27.726	28.3187	26.0602	30.454	28.7248	26.8875	28.974	27.8274	K	2	___1	1	5.61e-05			0.339042	0.735593	0.388543	0.658434	0.738359
I3L1F7;Q96M29	I3L1F7	Tektin-5	TEKT5	TNLAFNARISEVTDVKNKLQTQLAKTLQEIF	126	20.0993	25.6118	22.5049	19.9912	23.5885	25.2201	24.4341	23.7725	23.6718	19.1451	24.6886	25.4383	25.5085	23.4723	K	2	___1	1	0.00342036			0.216972	0.801509	0.606743	0.498295	0.738505
P22033	P22033	Methylmalonyl-CoA mutase. mitochondrial	MUT	EEMGGMAKAVAEGIPKLRIEECAARRQARID	465	19.2617	22.3295	21.7938	21.4218	22.5996	22.6059	19.0161	22.0005	18.3681	21.8772	22.7618	22.456	22.5517	22.8958	K	2	___1	1	0.00177068			0.236088	0.787519	0.554671	0.528174	0.739688
Q14324	Q14324	Myosin-binding protein C. fast-type	MYBPC2	ENMKDTATIRIRVVEKAGPPINVMVKEVWGT	932	20.4934	20.5629	22.2759	22.5892	20.7903	21.5864	21.621	20.5755	19.293	20.6496	22.1622	20.3985	21.0847	23.3251	K	2	___1	1	0.000261441			0.371707	0.722042	-0.347214	-0.686643	0.742913
X6R941;Q09161	X6R941	Nuclear cap-binding protein subunit 1	NCBP1	HSTIRKMNKHVLKIQKELEEAKEKLARQHKR	24	19.3612	22.8778	19.8451	23.379	21.6824	22.0371	20.073	22.4377	22.055	18.6998	22.6572	22.7077	21.4858	22.3054	K	2	___1	1	0.00213277			0.290135	0.75283	0.441857	0.600995	0.744392
P61981	P61981	14-3-3 protein gamma;14-3-3 protein gamma. N-terminally processed	YWHAG	KGDYYRYLAEVATGEKRATVVESSEKAYSEA	142	18.9892	19.6757	22.3063	22.8701	21.1266	23.2874	22.7878	20.9329	19.5111	21.8534	22.9306	20.2316	21.8061	21.209	K	2	___1	1	0.000862345			0.349314	0.736422	-0.366914	-0.665381	0.744444
P13929;P13929-2;E5RGZ4;P13929-3	P13929	Beta-enolase;Enolase	ENO3	VIGMDVAASEFYRNGKYDLDFKSPDDPARHI	256	28.2473	23.0914	24.354	25.8321	25.0659	25.4126	24.0605	28.3018	24.0427	26.3911	25.5258	24.0277	24.6458	25.6777	K	2	___1	1	0.000397872			0.347452	0.734973	0.364114	0.662037	0.747287
B0QYF7;P02144;B0QYF8;F2Z2F1;Q8WVH6	B0QYF7;P02144	Myoglobin	MB	KKHGATVLTALGGILKKKGHHEAEIKPLAQS	78	27.9266	26.9041	26.9315	27.0439	29.7558	26.9928	26.2781	28.4359	25.316	27.7589	28.1958	26.5201	26.5799	26.0941	K	2	___1	1	5.46e-221			0.301946	0.747426	-0.418871	-0.613951	0.747349
A0A0C4DGA2;O75521-2;O75521	A0A0C4DGA2	Enoyl-CoA delta isomerase 2. mitochondrial	ECI2	STFQKEVWTRLKAFAKLPPNALRISKEVIRK	309	24.7693	24.771	24.46	24.2643	26.2763	25.9448	22.3497	26.1785	22.4799	25.3063	24.8801	25.9212	26.3517	24.5092	K	2	___1	1	0.000615575			0.312644	0.744416	0.398785	0.624717	0.75045
P11055;P12882;Q9UKX2;Q9Y623	P11055;P12882;Q9UKX2;Q9Y623	Myosin-3;Myosin-1;Myosin-2;Myosin-4	MYH3;MYH1;MYH2;MYH4	ERAEDEEEINAELTAKKRKLEDECSELKKDI	945	23.5087	23.6862	23.9627	24.8421	23.7499	25.2885	24.7534	24.5999	23.435	22.9832	23.9434	23.2212	24.3071	25.2536	K	2	___1	1	9.86e-75			0.426109	0.713149	-0.292586	-0.721915	0.750458
Q6IC98	Q6IC98	GRAM domain-containing protein 4	GRAMD4	QELDRERQRRMELEQKVQEVLKARTEEQMAQ	127	19.0332	24.556	24.786	25.7147	25.3882	25.592	25.0861	20.628	23.0757	26.3921	25.0212	25.5656	23.2691	23.2338	K	2	___1	1	0.000249646			0.29281	0.754751	-0.424385	-0.601634	0.751166
J3KN67;D6RGJ6;P06753;P09493;H0YL52;H0YKP3;A0A087WTJ7;P09493-4;P09493-10;P09493-9;Q6ZN40	J3KN67;P06753;P09493;P09493-4;P09493-9;Q6ZN40	Tropomyosin alpha-3 chain;Tropomyosin alpha-1 chain	TPM3;TPM1	DELDKYSEALKDAQEKLELAEKKAADAEAEV;DELDKYSEALKDAQEKLELAEKKATDAEADV	71	29.6643	28.1398	27.604	28.9505	29.0911	28.3269	27.3972	29.4903	26.4969	28.2463	28.312	28.4829	27.2434	28.621	K	2	___1	1	7.52e-13			0.380813	0.721935	-0.325857	-0.688707	0.751466
P12883;P13533;Q9UKX3	P12883;P13533;Q9UKX3	Myosin-7;Myosin-6;Myosin-13	MYH7;MYH6;MYH13	EALEKSEARRKELEEKMVSLLQEKNDLQLQV;EELARSEARRKELEEKMVSLLQEKNDLQLQV;ETLEKSEARRKELEEKMVSLLQEKNDLQLQV	876	25.4065	22.8943	24.8278	25.6789	26.316	26.6705	26.5675	26.0857	25.0463	26.0509	25.7328	25.0538	25.9829	26.8727	K	2	___1	1	1.36e-166			0.349094	0.735582	0.351943	0.660006	0.753596
Q9NP98	Q9NP98	Myozenin-1	MYOZ1	YKSFNRTAMPYGGYEKASKRMTFQMPKFDLG	233	24.2723	23.6229	24.3198	24.7008	24.2092	24.4668	23.4266	24.6803	22.833	23.546	25.4164	24.5575	24.8593	25.2983	K	2	___1	1	0.000388047			0.394358	0.719315	0.310343	0.697041	0.754421
P69905	P69905	Hemoglobin subunit alpha	HBA1	________MVLSPADKTNVKAAWGKVGAHAG	8	32.3989	32.3312	31.9681	32.6272	27.5133	31.7709	30.8215	31.1997	32.1019	30.1946	32.521	31.4344	32.6224	32.6213	K	3	___1	1	5.37e-05			0.261796	0.772887	0.466313	0.560913	0.754955
Q9UMS6-5;Q9UMS6;Q9UMS6-3;Q9UMS6-4;Q9UMS6-2;H0Y9Y3	Q9UMS6-5	Synaptopodin-2	SYNPO2	QEAKRRSTTKPMFTFKEPKVSPNPELLSLLQ	305	19.1045	21.8345	20.7348	22.0602	21.4368	21.3528	21.54	19.9621	20.1774	20.2695	20.3701	21.8173	21.9132	21.2467	K	2	___1	1	0.00249376			0.367817	0.729545	-0.329614	-0.674765	0.756419
O60814;P57053;P62807;U3KQK0;Q99880;Q99877;Q93079;P58876;Q16778;Q8N257;P23527;Q6DRA6;Q6DN03	O60814;P62807;Q16778	Histone H2B type 1-K;Histone H2B type F-S;Histone H2B type 1-C/E/F/G/I;Histone H2B;Histone H2B type 1-L;Histone H2B type 1-N;Histone H2B type 1-H;Histone H2B type 1-D;Histone H2B type 2-E;Histone H2B type 3-B;Histone H2B type 1-O;Putative histone H2B type 2-D;Putative histone H2B type 2-C	HIST1H2BK;H2BFS;HIST1H2BC;HIST1H2BN;HIST1H2BL;HIST1H2BH;HIST1H2BD;HIST2H2BE;HIST3H2BB;HIST1H2BO;HIST2H2BD;HIST2H2BC	KSAPAPKKGSKKAVTKAQKKDGKKRKRSRKE	21	26.121	23.4521	22.4739	23.7649	22.001	23.4891	23.4224	25.3516	24.3966	22.7315	23.2076	22.9612	23.5713	24.4299	K	2	___2	1	6.54e-32			0.440457	0.712653	0.275043	0.725223	0.756581
O60814;P57053;P62807;U3KQK0;Q99880;Q99877;Q93079;P58876;Q16778;Q8N257;P23527;Q6DRA6;Q6DN03	O60814;P62807;Q16778	Histone H2B type 1-K;Histone H2B type F-S;Histone H2B type 1-C/E/F/G/I;Histone H2B;Histone H2B type 1-L;Histone H2B type 1-N;Histone H2B type 1-H;Histone H2B type 1-D;Histone H2B type 2-E;Histone H2B type 3-B;Histone H2B type 1-O;Putative histone H2B type 2-D;Putative histone H2B type 2-C	HIST1H2BK;H2BFS;HIST1H2BC;HIST1H2BN;HIST1H2BL;HIST1H2BH;HIST1H2BD;HIST2H2BE;HIST3H2BB;HIST1H2BO;HIST2H2BD;HIST2H2BC	PEPAKSAPAPKKGSKKAVTKAQKKDGKKRKR	17	26.121	23.4521	22.4739	23.7649	22.001	23.4891	23.4224	25.3516	24.3966	22.7315	23.2076	22.9612	23.5713	24.4299	K	2	___2	1	6.54e-32			0.440457	0.713624	0.275043	0.725223	0.756581
P40939;H0YFD6	P40939	Trifunctional enzyme subunit alpha. mitochondrial;Long-chain enoyl-CoA hydratase;Long chain 3-hydroxyacyl-CoA dehydrogenase	HADHA	MMSEVIRILQEGVDPKKLDSLTTSFGFPVGA	569	33.5205	33.4878	32.8633	32.9987	32.9157	34.1144	31.8954	33.4854	32.4235	34.0335	33.0816	33.028	34.0682	33.9471	K	2	___1	1	8.78e-07			0.373189	0.727398	0.324501	0.679042	0.756658
P02545;P02545-6;P02545-3;P02545-2;Q3BDU5;P02545-5;P02545-4;Q5TCI8	P02545	Prelamin-A/C;Lamin-A/C	LMNA	RIRIDSLSAQLSQLQKQLAAKEAKLRDLEDS	311	23.7816	19.5109	23.2498	23.6722	23.2006	20.5041	18.3436	22.35	18.9441	19.7469	22.8327	21.1068	23.5082	20.2606	K	3	___1	1	1e-42			0.23781	0.789001	-0.501929	-0.525866	0.75969
P68104;A0A087WVQ9;P68104-2;Q5VTE0;A0A087WV01;Q5JR01;A6PW80;Q05639	P68104;Q05639	Elongation factor 1-alpha 1;Putative elongation factor 1-alpha-like 3;Elongation factor 1-alpha;Elongation factor 1-alpha 2	EEF1A1;EEF1A1P5;EEF1A2	YKCGGIDKRTIEKFEKEAAEMGKGSFKYAWV	44	23.5837	22.0145	21.5672	23.5244	21.8324	20.8796	20.7984	23.5746	18.8602	21.3036	22.6694	21.5651	21.3349	22.1749	K	2	___1	1	0.00272343			0.30739	0.749201	-0.388214	-0.614661	0.759743
Q5BKX8	Q5BKX8	Muscle-related coiled-coil protein	MURC	EIMKKNKFRVVIFQEKFRCPTSLSVVKDRNL	138	21.1403	22.1707	22.7166	23.498	23.6728	22.8348	23.2479	22.6323	18.5713	23.1405	24.3946	18.1327	24.4594	23.9981	K	2	___1	1	0.000363296			0.210601	0.806885	-0.5646	-0.483748	0.760492
P68366-2;P68366	P68366-2	Tubulin alpha-4A chain	TUBA4A	GDVVPKDVNAAIAAIKTKRSIQFVDWCPTGF	321	19.4654	20.566	21.6934	23.4933	23.0459	23.2408	22.5625	22.2478	21.9241	19.138	22.5311	19.9448	22.3464	22.5961	K	2	___1	1	0.00108722			0.247495	0.780844	-0.477	-0.539114	0.761982
P00558;P00558-2	P00558	Phosphoglycerate kinase 1	PGK1	QITNNQRIKAAVPSIKFCLDNGAKSVVLMSH	48	23.8212	19.3893	25.9366	27.829	25.2224	27.7717	25.5693	25.7667	22.9626	28.7664	29.0736	18.8828	19.7542	25.2316	K	3	___1	1	1.23e-12			0.161341	0.851055	-0.7288	-0.396355	0.762807
Q562R1	Q562R1	Beta-actin-like protein 2	ACTBL2	DRMQKEIITLAPSTMKIKIIAPPERKYSVWI	327	23.723	19.5774	25.5768	26.766	25.7975	26.4479	24.9051	24.7655	20.1338	25.958	26.0374	25.0217	26.3068	26.7437	K	3	___1	1	0.000297196			0.376896	0.72755	0.310457	0.677008	0.763818
O14958;O14958-2	O14958	Calsequestrin-2	CASQ2	FPTYDGKDRVVSLSEKNFKQVLKKYDLLCLY	40	23.355	23.0407	23.0553	23.3701	23.5787	23.837	22.9965	23.8468	22.2567	20.7755	22.8089	24.0034	23.3798	23.8555	K	2	___1	1	6.62e-05			0.354509	0.73466	-0.329528	-0.658425	0.764151
P07451	P07451	Carbonic anhydrase 3	CA3	AELHLVHWNPKYNTFKEALKQRDGIAVIGIF	131	19.8951	19.6219	22.3297	22.1481	23.6886	24.4059	22.947	23.3926	20.6168	23.8819	20.0035	18.0141	22.5728	22.5248	K	3	___2	1	5.11e-33			0.201568	0.811931	-0.575686	-0.467958	0.765526
P48047	P48047	ATP synthase subunit O. mitochondrial	ATP5O	TDPSILGGMIVRIGEKYVDMSVKTKIQKLGR	192	27.8379	25.8223	26.3774	25.8969	26.3738	27.7029	27.6439	27.7054	26.2724	27.3693	26.2861	26.0732	27.6863	27.6824	K	2	___1	1	2.09e-07			0.571979	0.695331	0.202857	0.76217	0.765543
M0QZ10;M0QXF9;O15382;B3KSI3;M0QZP4;O15382-2	M0QZ10	Branched-chain-amino-acid aminotransferase;Branched-chain-amino-acid aminotransferase. mitochondrial	BCAT2	QTWGEFRVVERTITMKQLLRALEEGRVREVF	321	25.0065	24.8701	25.8386	24.3852	26.8151	26.7544	25.7234	26.3225	23.5058	26.3409	26.118	26.3461	27.1232	25.9099	K	2	___1	1	0.000174158			0.355838	0.734134	0.324729	0.65812	0.766389
P61981	P61981	14-3-3 protein gamma;14-3-3 protein gamma. N-terminally processed	YWHAG	______MVDREQLVQKARLAEQAERYDDMAA	10	18.4771	20.4794	22.4146	22.9009	23.6854	23.1542	22.5862	23.1832	20.9471	23.0358	23.6492	20.0798	23.447	22.9307	K	2	___1	1	2.56e-17			0.225843	0.795097	0.510714	0.506244	0.766758
P09622;E9PEX6;P09622-3;P09622-2	P09622	Dihydrolipoyl dehydrogenase. mitochondrial;Dihydrolipoyl dehydrogenase	DLD	QRILQKQGFKFKLNTKVTGATKKSDGKIDVS	277	21.3008	18.8382	21.1933	22.125	22.996	23.8151	22.9527	23.4566	19.0358	24.6803	22.3435	20.0764	23.182	23.7129	K	2	___2	1	4.07e-11			0.246811	0.781332	0.466629	0.536639	0.767063
P49773;D6REP8;D6RE99;D6RD60;D6RC06	P49773	Histidine triad nucleotide-binding protein 1	HINT1	AKAQVARPGGDTIFGKIIRKEIPAKIIFEDD	21	21.7458	19.9728	22.7578	23.842	23.2562	20.547	19.4608	22.3062	18.5558	19.7975	23.7475	23.9749	23.1537	23.5746	K	2	___1	1	4.32e-12			0.226742	0.795011	0.503971	0.507128	0.76865
Q00765	Q00765	Receptor expression-enhancing protein 5	REEP5	TKEAKKATVNLLGEEKKST____________	186	19.4241	20.4802	21.2157	22.4847	22.5299	22.4413	21.942	21.7391	20.73	20.5439	19.713	20.2327	21.5093	23.0118	K	2	___1	1	2e-06			0.26127	0.773546	-0.434014	-0.555108	0.770203
P12883;P13533	P12883;P13533	Myosin-7;Myosin-6	MYH7;MYH6	EEDKKNLLRLQDLVDKLQLKVKAYKRQAEEA;EEDRKNLLRLQDLVDKLQLKVKAYKRQAEEA	1870	25.7648	28.6412	27.9138	28.4375	27.7967	27.5078	25.1321	26.7061	26.5286	27.5337	27.5609	28.7411	28.5392	28.5868	K	2	___1	1	1.54e-34			0.262954	0.775638	0.428929	0.55691	0.771279
P49411	P49411	Elongation factor Tu. mitochondrial	TUFM	DAVDTYIPVPARDLEKPFLLPVEAVYSVPGR	256	26.3475	25.9228	25.6023	25.2419	24.6567	22.2026	20.975	24.7216	19.6283	27.696	27.0394	24.9983	26.0885	25.2012	K	2	___1	1	9.74e-26			0.178228	0.837789	0.632071	0.42664	0.771521
H0YK48;P09493-5;P09493;H0YL52;P09493-6;H0YNC7;P09493-9;Q6ZN40	H0YK48;P09493;P09493-6;P09493-9;Q6ZN40	Tropomyosin alpha-1 chain	TPM1	CAELEEELKTVTNNLKSLEAQAEKYSQKEDR	205	23.7274	19.7384	21.396	24.0158	24.0875	23.0275	22.3573	24.255	22.929	22.3041	22.7231	23.5917	21.2785	24.2439	K	2	___1	1	2.58e-153			0.262723	0.773926	0.425057	0.555892	0.773264
P06733;K7EM90	P06733	Alpha-enolase;Enolase	ENO1	LVSKKLNVTEQEKIDKLMIEMDGTENKSKFG	92	18.1879	21.1596	21.8556	23.4759	23.3484	23.6537	22.3593	19.5774	19.6169	21.7344	21.9384	21.8493	22.8722	23.8758	K	2	___1	1	7.52e-07			0.303446	0.754844	-0.368	-0.60386	0.773271
A0A0G2JIW1;P0DMV9;P0DMV8;P0DMV8-2	A0A0G2JIW1	Heat shock 70 kDa protein 1B;Heat shock 70 kDa protein 1A	HSPA1B;HSPA1A	KNQVALNPQNTVFDAKRLIGRKFGDPVVQSD	72	21.8453	23.3639	23.0806	24.0286	24.5602	23.1023	23.1661	23.261	21.8133	23.5266	23.4446	22.8236	22.5247	23.4242	K	2	___1	1	2.13e-61			0.333879	0.741337	-0.332715	-0.633627	0.774307
Q9NVH6-4;Q9NVH6-7;Q9NVH6-2;Q9NVH6-5;Q9NVH6-3;Q9NVH6;Q9NVH6-8;Q9NVH6-6	Q9NVH6-4	Trimethyllysine dioxygenase. mitochondrial	TMLHE	WYFTSDFSRGDTAYTKLALDRHTDTTYFQEP	236	19.1571	19.1655	19.5293	21.4194	20.9274	23.7567	21.0236	19.8464	22.3326	20.7183	21.9053	19.4262	21.2922	22.5398	K	2	___1	1	0.000480472			0.251605	0.780055	0.440257	0.540707	0.77487
E9PLK3;P55786;P55786-2	E9PLK3;P55786-2	Puromycin-sensitive aminopeptidase	NPEPPS	TSEDPNQAKLKILMDKPEMNVVLKNVKPDQW	559	21.3757	19.1973	22.1016	23.6089	23.3016	23.8341	22.7222	23.1659	21.835	22.0328	23.3133	21.8465	22.757	23.927	K	2	___1	1	4.06e-05			0.282002	0.766019	0.390871	0.578577	0.775843
Q6NZI2;Q6NZI2-2;Q6NZI2-3	Q6NZI2	Polymerase I and transcript release factor	PTRF	SKTAVYKVPPFTFHVKKIREGQVEVLKATEM	326	23.2758	18.7151	20.5048	22.6602	23.0086	21.9749	20.484	23.9621	20.1821	22.7895	22.1231	19.6107	22.462	22.6054	K	3	___1	1	0.00140578			0.243897	0.787637	0.4445	0.528838	0.77909
P10412	P10412	Histone H1.4	HIST1H1E	SETAPAAPAAPAPAEKTPVKKKARKSAGAAK	17	26.7705	25.2086	24.0233	25.3174	25.3871	25.0653	23.6281	24.8621	24.3438	24.1826	25.8511	26.1276	22.0439	25.187	K	3	___1	1	6.03e-42			0.270248	0.773538	-0.400314	-0.562934	0.7795
P17096;P17096-3;P17096-2	P17096	High mobility group protein HMG-I/HMG-Y	HMGA1	_MSESSSKSSQPLASKQEKDGTEKRGRGRPR	15	23.8343	19.4642	21.081	21.6342	19.8971	21.4381	20.1644	23.0697	19.4829	21.6948	21.5438	19.2337	21.8623	23.0253	K	2	___1	1	0.00150149			0.313458	0.750286	0.342743	0.610207	0.780844
P00915;E5RHP7;E5RH81;E5RFE7;H0YBE2;E5RJI8;E5RJF6	P00915	Carbonic anhydrase 1	CA1	LAVIGVLMKVGEANPKLQKVLDALQAIKTKG	157	25.8187	20.4186	23.5247	25.2717	22.8713	23.7452	19.8947	24.8141	22.978	22.3817	24.2426	23.4701	23.7035	22.8278	K	2	___1	1	0.00014998			0.259109	0.777731	0.410415	0.547694	0.782813
Q15424-2;Q15424;Q15424-4;Q15424-3;Q14151	Q15424-2	Scaffold attachment factor B1;Scaffold attachment factor B2	SAFB;SAFB2	AHAQSSKADSLLAVVKREPAEQPGDGERTDC	225	20.5369	20.3574	23.4214	24.8553	24.47	24.5707	23.3098	23.9682	19.4411	25.0123	25.3943	20.759	25.2099	25.0455	K	2	___1	1	0.000128876			0.220105	0.805174	0.472686	0.492378	0.786973
O75323;O75323-2;F8WBI5	O75323	Protein NipSnap homolog 2	GBAS	RKVDPRKDAHSNLLAKKETSNLYKLQFHNVK	67	21.2123	21.5479	20.9082	21.1138	23.1089	22.7072	19.495	23.1868	21.7931	20.7632	22.7462	19.8939	22.1781	22.6868	K	2	___1	1	1.02e-06			0.230797	0.79476	0.450686	0.50799	0.787015
P23528;E9PK25;E9PP50;E9PS23;Q9Y281;F8WDN3	P23528;Q9Y281	Cofilin-1;Cofilin-2	CFL1;CFL2	GVAVSDGVIKVFNDMKVRKSSTPEEVKKRKK;GVTVNDEVIKVFNDMKVRKSSTQEEIKKRKK	19	22.1869	23.9736	23.3199	24.0664	23.6706	23.4934	21.9919	22.3758	22.1799	22.4903	23.45	23.7288	23.288	23.1674	K	2	___1	1	0.00110501			0.355098	0.741197	-0.288929	-0.641132	0.789591
P10809	P10809	60 kDa heat shock protein. mitochondrial	HSPD1	KVGEVIVTKDDAMLLKGKGDKAQIEKRIQEI	359	23.2181	21.6666	17.6791	21.6361	22.7746	23.3048	21.7348	23.8001	19.2708	22.6136	22.8635	22.3827	22.4017	21.9671	K	2	___1	1	0.000995266			0.216879	0.804541	0.469343	0.486434	0.79106
C9JRZ6;F8WAR4;Q9NX63	C9JRZ6	MICOS complex subunit MIC19	CHCHD3	VTTEQYQKAAEEVEAKFKRYESHPVCADLQA	178	23.21	23.7188	23.1145	22.8709	23.271	23.1601	24.2441	24.4572	22.3337	23.3244	23.6579	21.2564	23.5516	22.595	K	2	___1	1	0.000114701			0.291461	0.764952	-0.344743	-0.580672	0.793452
O43920	O43920	NADH dehydrogenase [ubiquinone] iron-sulfur protein 5	NDUFS5	________MPFLDIQKRFGLNIDRWLTIQSG	8	22.646	20.4456	21.4473	21.0089	22.2734	20.9543	21.9084	23.0608	19.9927	20.1245	22.0897	22.1288	22.0627	23.295	K	2	___1	1	0.00799215			0.338712	0.745244	0.295758	0.624796	0.794005
O00330-3;O00330	O00330-3	Pyruvate dehydrogenase protein X component. mitochondrial	PDHX	GAVLKVRQDLVKDDIKVSVNDFIIKAAAVTL	310	25.4369	19.959	24.5412	25.5261	24.9911	26.1531	26.0405	25.1434	25.2827	20.3765	26.8167	25.7037	26.7307	26.1781	K	2	___1	1	1.2e-15			0.191323	0.823384	0.511986	0.44451	0.798078
P02545;P02545-6;P02545-3;P02545-2;Q3BDU5;P02545-5;P02545-4;Q5TCI8;H0YAB0	P02545	Prelamin-A/C;Lamin-A/C	LMNA	LLNSKEAALSTALSEKRTLEGELHDLRGQVA	155	19.8513	19.4515	23.7284	25.0292	24.4819	25.1611	25.108	24.5902	23.0791	22.9653	24.5792	23.0423	19.5177	20.8217	K	2	___1	1	3.14e-06			0.161933	0.852354	-0.602271	-0.393066	0.798863
A0A0A0MTS7;Q8WZ42-12;Q8WZ42-13;Q8WZ42-11;Q8WZ42-4;Q8WZ42-7;Q8WZ42-2;Q8WZ42;Q8WZ42-8;Q8WZ42-5;A0A0A0MRA3;Q8WZ42-3;Q8WZ42-10;Q8WZ42-9	A0A0A0MTS7	Titin	TTN	TGLSRPRRTAMSIKTKLTSGEAPGIRKEMKD	33094	20.8151	21.8243	21.7051	21.2419	20.0139	22.3494	21.6897	21.0243	22.0971	19.3182	20.5949	20.1345	22.1856	22.2345	K	2	___1	1	0.000476561			0.330867	0.748329	-0.2929	-0.613952	0.799999
P06748-2;P06748	P06748-2	Nucleophosmin	NPM1	QASIEKGGSLPKVEAKFINYVKNCFRMTDQE	238	28.0017	23.9632	26.5607	28.588	28.6363	27.7606	27.6895	28.5122	25.7342	28.029	28.5476	26.1168	28.0264	28.7169	K	2	___1	1	4.13e-05			0.272456	0.774377	0.354729	0.556171	0.800483
P34897-3;P34897-2;P34897	P34897-3	Serine hydroxymethyltransferase. mitochondrial	SHMT2	IGLEVKSKTAKLQDFKSFLLKDSETSQRLAN	448	20.0631	19.5964	22.8256	21.5745	19.0698	23.4769	20.691	20.1267	18.3764	25.6092	23.7337	18.1883	22.6624	21.2008	K	2	___1	1	0.0016735			0.25775	0.781421	0.371457	0.538071	0.802153
A0A0A0MTS7;Q8WZ42-12;Q8WZ42-13;Q8WZ42-11;Q8WZ42-4;Q8WZ42-7;Q8WZ42-2;Q8WZ42;Q8WZ42-8;Q8WZ42-5;A0A0A0MRA3;Q8WZ42-3;Q8WZ42-10;Q8WZ42-9	A0A0A0MTS7	Titin	TTN	LFGKTSYQFRVIAENKFGLSKPSEPSEPTIT	33767	19.491	19.461	20.4102	21.0018	20.7096	22.3351	22.156	19.7274	21.8253	20.4215	19.3147	19.6347	21.0255	21.1915	K	2	___1	1	0.00137813			0.274192	0.775023	-0.3463	-0.556566	0.803614
Q5JRX3;Q5JRX3-2;A0A0A0MRX9;Q5JRX3-3;B1APQ0	Q5JRX3	Presequence protease. mitochondrial	PITRM1	TLQSFGKAVDWAKSGKFTQQDIDEAKLSVFS	946	24.3189	24.8912	23.2571	20.7146	23.6886	23.9959	24.5023	25.5822	24.0201	24.5485	23.296	21.824	23.6806	24.9466	K	2	___1	1	8.08e-29			0.261151	0.780571	0.361343	0.54101	0.804702
Q9NXA8-4;Q9NXA8-2;Q9NXA8	Q9NXA8-4	NAD-dependent protein deacylase sirtuin-5. mitochondrial	SIRT5	GAPEPGTQDASIPVEKLPRCEEAGCGGLLRP	95	20.4786	19.3159	22.2554	19.7424	24.8128	22.9604	22.5825	21.5291	22.0787	23.8419	22.1695	19.7403	23.5148	22.6869	K	2	___1	1	2.59e-40			0.192943	0.823872	0.4876	0.445552	0.805232
A0A0A0MTS7;Q8WZ42-12;Q8WZ42-13;Q8WZ42-11;Q8WZ42-4;Q8WZ42-7;Q8WZ42-2;Q8WZ42;Q8WZ42-8;Q8WZ42-5;A0A0A0MRA3;Q8WZ42-3;Q8WZ42-10;Q8WZ42-9	A0A0A0MTS7	Titin	TTN	SVKDAVRVDSGNYILKAKNVAGERSVTVNVK	25185	19.1143	19.8606	20.906	18.229	20.7079	22.4963	22.0092	21.09	21.8544	19.1613	20.4394	20.0255	21.5106	21.8824	K	2	___1	1	0.00103396			0.246678	0.787937	0.377186	0.522186	0.807154
Q96A32;H3BPK4;H3BN54;H3BML9	Q96A32	Myosin regulatory light chain 2. skeletal muscle isoform	MYLPF	KLKGADPEDVITGAFKVLDPEGKGTIKKKFL	105	24.6702	25.9821	25.6328	26.9159	25.1571	24.9506	21.2322	25.21	22.5717	26.4184	27.7968	25.6517	24.6645	25.3088	K	3	___1	1	4.43e-166			0.211283	0.811547	0.440142	0.473486	0.807245
P04075;J3KPS3;P04075-2;H3BQN4;H3BR68	P04075	Fructose-bisphosphate aldolase A;Fructose-bisphosphate aldolase	ALDOA	GGKKENLKAAQEEYVKRALANSLACQGKYTP	330	26.1758	26.7138	26.6424	27.3323	25.421	26.0844	25.9688	27.3103	24.4664	26.6218	27.2536	27.7362	26.4593	26.9164	K	2	___1	1	0.000323596			0.268224	0.778322	0.3465	0.547954	0.807347
O00330-3;O00330;H0YD97;O00330-2	O00330-3	Pyruvate dehydrogenase protein X component. mitochondrial	PDHX	RVVDDELATRFLKSFKANLENPIRLA_____	476	24.3167	20.3442	24.7115	22.695	24.6389	25.7795	23.8386	25.1007	18.0626	27.0386	23.5369	19.3674	25.9538	23.96	K	2	___2	1	1.97e-79			0.194978	0.823676	-0.472057	-0.447906	0.80902
P06748-2;P06748;P06748-3	P06748-2	Nucleophosmin	NPM1	KTPKTPKGPSSVEDIKAKMQASIEKGGSLPK	219	20.9718	21.2368	19.4013	21.8676	21.5859	20.1066	20.6339	20.5831	18.4586	23.2152	21.7488	22.6125	21.2884	20.8039	K	2	___1	1	1.3e-06			0.22155	0.804202	0.415229	0.487804	0.809107
Q8NE86-3;Q8NE86;Q8NE86-2	Q8NE86-3	Calcium uniporter protein. mitochondrial	MCU	YNQLKDAIAQAEMDLKRLRDPLQVHLPLRQI	283	25.462	25.2199	25.421	25.8128	27.6779	27.7106	26.7433	26.6115	26.0919	27.481	25.9367	25.9305	27.216	27.0169	K	2	___1	1	1.3e-12			0.287565	0.771144	0.319572	0.567747	0.809286
P10916;G3V1V8	P10916	Myosin regulatory light chain 2. ventricular/cardiac muscle isoform	MYL2	LNAFKVFDPEGKGVLKADYVREMLTTQAERF	115	24.4196	20.6933	21.6549	26.6081	26.7512	26.0689	25.1943	20.3622	25.839	20.3494	25.8407	22.4085	25.9075	26.8859	K	2	___1	1	0.0082065			0.168847	0.849189	-0.542443	-0.403821	0.80986
P04150-7;P04150-5;P04150-13;P04150-12;P04150-11;P04150-9;P04150-2;P04150-6;P04150-8;P04150-10;P04150;P04150-3	P04150-7	Glucocorticoid receptor	NR3C1	PKSSASTAVSAAPTEKEFPKTHSDVSSEQQH	154	19.2122	20.8979	18.1094	20.4892	21.8777	20.1437	21.0695	20.74	17.9099	20.1587	18.989	20.1882	20.2321	20.8538	K	2	___1	1	9.75e-06			0.230116	0.800829	-0.3897	-0.498082	0.813437
P40939	P40939	Trifunctional enzyme subunit alpha. mitochondrial;Long-chain enoyl-CoA hydratase;Long chain 3-hydroxyacyl-CoA dehydrogenase	HADHA	SPVDKMQLLEIITTEKTSKDTSASAVAVGLK	516	26.6092	22.9621	27.7046	28.1087	28.231	28.439	25.5653	27.2439	25.2186	27.9123	28.5341	24.0141	29.2133	28.5901	K	3	___1	1	6.05e-20			0.201606	0.818	0.443786	0.456986	0.813824
P40925;P40925-3;P40925-2;C9JF79;C9JRL4;C9JLV6	P40925	Malate dehydrogenase. cytoplasmic;Malate dehydrogenase	MDH1	GMERKDLLKANVKIFKSQGAALDKYAKKSVK	110	21.3506	22.7331	21.6511	22.836	21.9333	22.1754	21.6673	22.2133	22.0241	21.0409	22.4023	23.3187	22.016	23.2884	K	2	___1	1	8.03e-05			0.317374	0.758709	0.279557	0.591445	0.815222
P12883	P12883	Myosin-7	MYH7	TQQLEDLKRQLEEEVKAKNALAHALQSARHD	1324	24.8287	23.3031	22.6691	24.0514	23.1206	24.1764	23.6757	24.9294	23.198	22.7306	24.3382	23.1734	24.1485	24.0544	K	2	___1	1	4.94e-05			0.828148	0.737256	0.106786	0.649411	0.815765
P02787	P02787	Serotransferrin	TF	HGKDLLFKDSAHGFLKVPPRMDAKMYLGYEY	323	22.8322	20.0169	21.5461	21.735	22.7058	21.6236	18.6429	23.2284	19.9316	21.2129	22.2999	19.2434	22.8343	23.532	K	3	___1	1	0.00268386			0.191546	0.825894	0.454286	0.440064	0.818434
A0A0A0MTS7;Q8WZ42-12;Q8WZ42-13;A0A1B0GXE3	A0A0A0MTS7	Titin	TTN	KKPEVLPEKVPKVPEKIIPEKEVSVPIPAEP	13359	21.126	20.8987	22.67	21.5454	22.3127	23.4078	22.7535	21.951	19.2342	21.4863	21.2145	22.4509	23.1894	23.3469	K	2	___1	1	2.06e-05			0.327529	0.755378	-0.262986	-0.595736	0.820096
P31948;P31948-3;P31948-2	P31948	Stress-induced-phosphoprotein 1	STIP1	RQIAKAYARIGNSYFKEEKYKDAIHFYNKSL	312	20.8706	20.4282	21.6046	21.9676	21.2778	21.7024	21.5685	21.6988	18.9983	21.791	22.2089	19.2456	21.7591	21.7435	K	2	___1	1	4.04e-05			0.302693	0.766585	-0.282072	-0.574156	0.821521
Q16775-2;Q16775;H3BPK3;H3BPQ4;H3BQW8;Q16775-3	Q16775-2	Hydroxyacylglutathione hydrolase. mitochondrial	HAGH	THHHWDHAGGNEKLVKLESGLKVYGGDDRIG	68	25.0897	24.8831	19.1653	25.5599	24.6686	25.1404	25.0125	23.8696	23.0375	24.2753	24.7863	25.803	25.2844	25.493	K	2	___1	1	0.00604947			0.196009	0.82452	0.4328	0.445916	0.822559
A0A0C4DGA2;O75521-2;O75521	A0A0C4DGA2	Enoyl-CoA delta isomerase 2. mitochondrial	ECI2	KIMSPAKATEMLIFGKKLTAGEACAQGLVTE	274	22.1436	20.0181	21.6803	22.8669	23.0333	23.5972	22.9645	21.6579	21.3405	26.3082	20.2759	22.6622	23.2683	23.7648	K	2	___1	1	0.000353582			0.199529	0.820226	0.424843	0.451259	0.822681
Q14315-2;Q14315	Q14315-2	Filamin-C	FLNC	TKSSSSRGSSYSSIPKFSSDASKVVTRGPGL	2597	23.0303	23.1971	23.1129	23.9289	23.8145	23.6856	19.9938	23.442	22.3615	22.9069	23.8873	23.2436	23.4836	23.9565	K	2	___1	1	9.14e-05			0.235021	0.800107	0.359757	0.500587	0.823094
P40925;P40925-3;C9JF79;C9JRL4;C9JLV6	P40925	Malate dehydrogenase. cytoplasmic;Malate dehydrogenase	MDH1	QDCALPLLKDVIATDKEDVAFKDLDVAILVG	73	24.6235	21.7648	20.4459	24.817	25.0256	23.4686	23.3098	25.097	23.8334	21.2613	23.033	22.7825	22.6719	22.3457	K	2	___1	1	5.29e-10			0.243385	0.79501	-0.3472	-0.51099	0.823184
Q86WA6-2;Q86WA6;Q49AI2;B4DML3	Q86WA6-2	Valacyclovir hydrolase	BPHL	ADFFERDAKDAVDLMKALKFKKVSLLGWSDG	109	23.5538	19.1338	23.449	23.7403	24.9854	25.4564	23.0447	25.1723	24.2539	26.2406	23.9297	22.4573	21.2636	23.593	K	2	___1	1	0.00221816			0.16478	0.853361	0.506715	0.393836	0.825095
P49411	P49411	Elongation factor Tu. mitochondrial	TUFM	SALCALEGRDPELGLKSVQKLLDAVDTYIPV	234	20.1824	20.6057	21.6601	19.988	22.0072	22.6355	19.8671	21.3737	21.7118	22.0054	21.74	19.4664	21.2655	21.9401	K	2	___1	1	1.94e-07			0.227475	0.805073	0.365271	0.489639	0.825867
G5E9X5;F5GYT8;E9PG35;E9PHF7;Q96RQ3	G5E9X5	Methylcrotonoyl-CoA carboxylase subunit alpha. mitochondrial	MCCC1	RRHQKIIEEAPAPGIKSEVRKKLGEAAVRAA	257	19.9356	21.9884	19.4252	21.1733	22.7047	21.907	21.5536	19.9168	23.0094	21.8379	21.1565	20.2125	22.3702	22.5669	K	2	___1	1	0.000123514			0.243863	0.794109	0.340343	0.510207	0.826044
Q13642-5;Q13642-4;Q13642-1;Q5JXI2;Q5JXI8;Q13642;A0A0D9SFZ9;Q5JXH8;Q5JXH7;Q5JXI3;Q13642-3;A0A0D9SFI6;A0A0D9SFB0;Q5JXH9;A0A0D9SGB2;Q5JXI0;A0A0D9SG53;A0A0D9SGD1;A0A0D9SEY7	Q13642-5	Four and a half LIM domains protein 1	FHL1	ECRKPIGADSKEVHYKNRFWHDTCFRCAKCL	73	24.5984	19.512	21.8778	20.7099	20.7853	23.3531	19.7824	24.9427	19.1705	21.326	21.9767	19.1745	22.9879	23.6323	K	3	___1	1	0.00689484			0.222303	0.807531	0.370243	0.482163	0.827359
Q14315-2;Q14315	Q14315-2	Filamin-C	FLNC	KPTHFTVLTKGAGKAKLDVQFAGTAKGEVVR	901	19.846	19.1162	19.159	21.5969	19.1074	21.0737	19.0391	19.4027	21.9082	18.4032	19.6404	20.2648	20.3955	21.5325	K	2	___1	1	0.000636823			0.219304	0.809659	0.372714	0.477685	0.828443
P07585;F8VXZ8;F8VUF6;F8VWU0	P07585	Decorin	DCN	NKISKVSPGAFTPLVKLERLYLSKNQLKELP	130	22.9402	24.3184	23.5354	24.7559	24.7153	23.0259	22.4046	23.3936	18.4923	23.327	24.2926	24.5705	24.5897	23.9197	K	2	___1	1	2.5e-19			0.183095	0.840274	-0.444328	-0.423767	0.829174
P06732	P06732	Creatine kinase M-type;Creatine kinase M-type. N-terminally processed	CKM	KPTDKHKTDLNHENLKGGDDLDPNYVLSSRV	116	29.9668	23.5869	24.4322	25.0623	25.5404	25.278	21.5135	28.3188	19.5394	25.4301	25.5688	24.7649	23.3243	25.323	K	3	___1	1	3.54e-68			0.18282	0.839954	-0.4444	-0.42327	0.829382
P12270	P12270	Nucleoprotein TPR	TPR	EGYRREITSLHERNQKLTATTQKQEQIINTM	748	25.1337	20.3268	22.2047	23.3343	22.7459	22.327	23.0284	25.7168	21.6457	22.5647	23.1761	22.5667	22.8002	22.1793	K	2	___1	1	0.000107805			0.366839	0.74893	0.221243	0.612289	0.829544
P50461	P50461	Cysteine and glycine-rich protein 3	CSRP3	QSPKPARSVTTSNPSKFTAKFGESEKCPRCG	109	27.1414	23.3457	27.3227	27.727	27.1033	27.6757	27.3075	25.1043	26.0108	26.6214	27.776	24.7866	27.2502	27.5911	K	2	___1	1	7.2e-20			0.227738	0.804753	-0.3547	-0.488109	0.830274
C9J5D1;E7EQ69;Q9GZZ1;C9JZU6;A0A087WWJ2;F8WCK0;C9J5J3;A0A0D9SF32	C9J5D1	N-alpha-acetyltransferase 50	NAA50	LKRLNQVIFPVSYNDKFYKDVLEVGELAKLG	34	26.2487	26.696	27.4256	27.8504	27.5341	27.5657	26.236	26.5215	25.0578	28.347	29.3216	26.8042	27.8053	27.7405	K	3	___1	1	3.36e-46			0.276055	0.779721	0.291628	0.542817	0.830796
P12882	P12882	Myosin-1	MYH1	AKTSVFVVDPKESFVKATVQSREGGKVTAKT	49	19.4398	17.9944	22.2492	22.7858	19.8157	22.5551	22.7003	21.6746	20.3916	18.8878	23.0628	20.2357	22.5503	23.3985	K	2	___1	1	2.68e-05			0.210114	0.814293	0.380143	0.463624	0.832007
P32119;A6NIW5;P32119-2	P32119	Peroxiredoxin-2	PRDX2	DFKATAVVDGAFKEVKLSDYKGKYVVLFFYP	29	26.8578	24.1297	24.2072	24.0464	24.1086	24.5972	19.1928	25.6555	23.911	23.6738	24.0707	24.1502	24.3923	24.0177	K	2	___1	1	0.00559183			0.204516	0.818362	0.390214	0.455594	0.832137
Q9UII2;A0A0B4J230;Q9UII2-3;Q9UII2-2	Q9UII2	ATPase inhibitor. mitochondrial	ATPIF1	DRGAGSIREAGGAFGKREQAEEERYFRAQSR	49	19.6029	20.5344	19.4219	20.5697	20.9577	20.635	19.8747	22.7999	19.3392	20.9649	20.8995	20.9748	20.4758	18.546	K	2	___1	1	0.0030777			0.230845	0.804712	0.343399	0.490785	0.833159
P09622;E9PEX6;P09622-3;P09622-2	P09622	Dihydrolipoyl dehydrogenase. mitochondrial;Dihydrolipoyl dehydrogenase	DLD	SEEQLKEEGIEYKVGKFPFAANSRAKTNADT	420	29.6611	30.1002	29.3772	28.9585	30.8184	30.1886	29.3352	30.9482	26.4144	30.9296	30.7258	30.7338	30.8371	30.4829	K	2	___1	1	0.000472486			0.208853	0.814342	0.376086	0.460905	0.834552
P08237;P08237-2;P08237-3	P08237	ATP-dependent 6-phosphofructokinase. muscle type	PFKM	QQGGSPTPFDRNFATKMGAKAMNWMSGKIKE	678	27.3652	25.7519	25.63	26.4724	23.6634	25.8551	25.4469	27.8212	24.3288	25.5829	26.0874	25.5587	26.0743	26.6722	K	2	___1	1	0.00165314			0.282293	0.778881	0.277228	0.545861	0.835104
P31040-2;P31040;D6RFM5	P31040-2	Succinate dehydrogenase [ubiquinone] flavoprotein subunit. mitochondrial	SDHA	EDGKIYQRAFGGQSLKFGKGGQAHRCCCVAD	131	26.0931	20.0257	26.1758	26.7213	27.8676	27.9664	26.7136	27.4951	24.3005	27.944	27.1772	22.9223	27.2202	27.7607	K	2	___1	1	1.97e-07			0.168015	0.850955	0.465215	0.397308	0.835289
Q96A32;H3BPK4;H3BN54;H3BML9	Q96A32	Myosin regulatory light chain 2. skeletal muscle isoform	MYLPF	TGAFKVLDPEGKGTIKKKFLEELLTTQCDRF	116	20.0504	24.0332	23.8891	23.2171	23.3641	22.7213	22.8751	22.7616	21.7585	22.617	23.6697	23.0771	19.3416	24.1534	K	2	___2	1	0.00362918			0.197068	0.823741	-0.395914	-0.443517	0.835561
C9JFR7;P99999	C9JFR7	Cytochrome c	CYCS	PKKYIPGTKMIFVGIKKKEERADLIAYLKK_	87	20.6894	18.4286	21.2482	22.5792	22.426	22.8773	22.9342	22.5176	18.1942	21.7147	21.5237	20.0415	21.8974	23.1188	K	2	___1	1	0.00430169			0.250757	0.794456	-0.310714	-0.513133	0.835769
P09622;E9PEX6;P09622-3;P09622-2	P09622	Dihydrolipoyl dehydrogenase. mitochondrial;Dihydrolipoyl dehydrogenase	DLD	GIDMEISKNFQRILQKQGFKFKLNTKVTGAT	267	27.37	24.4707	27.0207	28.378	28.0323	28.4922	28.0073	24.737	27.287	24.5436	28.0097	27.7545	28.2296	28.6153	K	2	___1	1	0.000455463			0.21014	0.814219	-0.370643	-0.462224	0.83582
P05976	P05976	Myosin light chain 1/3. skeletal muscle isoform	MYL1	APAPAPAPAPAPAPAKPKEEKIDLSAIKIEF	32	28.216	25.2975	27.3514	28.6129	27.0747	27.3117	25.854	27.9518	25.3351	26.5896	27.393	26.8156	26.6873	27.2668	K	3	___1	1	1.59e-27			0.322047	0.765474	-0.239858	-0.576787	0.837056
Q13825	Q13825	Methylglutaconyl-CoA hydratase. mitochondrial	AUH	ERAKMSSSEVGPFVSKIRAVINDIANLPVPT	160	23.1211	22.7446	23.7369	23.6629	26.1978	25.2513	24.6568	24.3863	23.1187	25.4833	24.1836	23.9179	24.9538	25.4618	K	3	___1	1	3.42e-110			0.250569	0.795686	0.304857	0.511238	0.838711
P10809	P10809	60 kDa heat shock protein. mitochondrial	HSPD1	LTPANEDQKIGIEIIKRTLKIPAMTIAKNAG	469	25.5406	17.7415	24.9565	24.6508	26.2095	26.7538	26.2125	26.768	23.6932	28.0074	26.0852	20.1777	25.5255	25.5427	K	2	___1	1	3.48e-06			0.142674	0.875403	0.5335	0.351077	0.839234
P04792;F8WE04	P04792	Heat shock protein beta-1	HSPB1	VSLDVNHFAPDELTVKTKDGVVEITGKHEER	112	25.383	20.2201	24.3911	24.3998	26.8346	26.15	24.6478	25.7512	19.1405	27.3247	26.813	26.3541	24.4047	24.7157	K	3	___1	1	1.61e-34			0.214998	0.810585	0.353928	0.467472	0.839279
A0A087WXS0;P48788-2;P48788	A0A087WXS0	Troponin I. fast skeletal muscle	TNNI2	VRVQKTSKELEDMNQKLFDLRGKFKRPPLRR	99	25.002	23.2218	22.8875	24.6865	24.4989	18.4321	19.85	24.0445	20.9488	21.8066	24.7649	24.4316	21.2782	24.2069	K	2	___1	1	9.51e-19			0.182366	0.840713	0.414671	0.419578	0.840191
J3QS39;J3QTR3;F5H6Q2;F5GYU3;F5H2Z3;F5H265;B4DV12;F5H388;F5H747;F5GXK7;J3QKN0;Q5PY61;Q96C32;P62987;P62979;P0CG47;P0CG48;M0R1V7;Q49A90;J3QSA3;F5GZ39	J3QS39	Ubiquitin-60S ribosomal protein L40;Ubiquitin;60S ribosomal protein L40;Ubiquitin-40S ribosomal protein S27a;Ubiquitin;40S ribosomal protein S27a;Polyubiquitin-B;Ubiquitin;Polyubiquitin-C;Ubiquitin	UBB;RPS27A;UBC;UBA52	__________MQIFVKTLTGKTITLEVEPSD	6	25.1536	23.8046	25.6465	26.5242	26.8291	27.1141	25.9325	25.457	24.1686	25.5599	26.0194	26.2843	26.0501	26.1632	K	2	___1	1	4.32e-08			0.40415	0.748566	-0.186014	-0.614383	0.841051
Q04446;E9PGM4	Q04446	1.4-alpha-glucan-branching enzyme	GBE1	SQILKNIGENEGGIDKFSRGYESFGVHRCAD	68	21.2339	20.8674	18.3398	20.1371	22.2524	21.1323	19.5883	23.2164	20.2937	21.1582	20.8684	19.2844	19.741	21.7155	K	2	___1	1	3.13e-20			0.191095	0.832874	0.389486	0.432295	0.842502
H0Y8Z9;Q9H845	H0Y8Z9	Acyl-CoA dehydrogenase family member 9. mitochondrial	ACAD9	NLDEQIKKVSQQILEKRAYICAHPLDRTC__	371	20.1887	20.4714	21.5488	18.9225	21.7899	21.8639	19.6984	20.5767	18.9455	21.9234	19.9515	20.8939	19.6355	20.5009	K	2	___1	1	0.000948827			0.252397	0.794421	-0.293743	-0.510625	0.843064
A0A087WUQ6;P07203	A0A087WUQ6	Glutathione peroxidase;Glutathione peroxidase 1	GPX1	GHQENAKNEEILNSLKYVRPGGGFEPNFMLF	96	19.1089	19.4887	23.4944	23.3406	24.2909	24.606	22.1258	23.4439	19.7022	26.3765	23.2111	19.2971	24.3659	23.2968	K	2	___1	1	8.94e-74			0.159807	0.85871	0.4626	0.381363	0.843477
P07954-2;P07954	P07954-2	Fumarate hydratase. mitochondrial	FH	RIEYDTFGELKVPNDKYYGAQTVRSTMNFKI	23	26.1062	24.6054	20.3729	24.2159	19.9584	20.5863	23.5169	26.667	25.9179	18.6608	19.4899	19.4683	26.0312	26.5456	K	2	___1	1	4.26e-05			0.150246	0.867064	0.488386	0.364168	0.844544
Q13423;D6RAI5;D6RHU2	Q13423	NAD(P) transhydrogenase. mitochondrial	NNT	KQLTVGVPKEIFQNEKRVALSPAGVQNLVKQ	70	32.7228	31.3855	31.7597	30.506	31.8837	32.0459	30.5571	32.9774	30.7447	32.7175	31.4715	30.8147	32.1367	31.6464	K	2	___1	1	0.000335646			0.311289	0.772893	0.235457	0.561922	0.844705
P10809;E7EXB4;E7ESH4;P10809-2;C9JL25;C9JCQ4	P10809	60 kDa heat shock protein. mitochondrial	HSPD1	SWGSPKVTKDGVTVAKSIDLKDKYKNIGAKL	82	20.3658	18.9064	19.7267	22.2312	19.9363	23.651	22.2438	23.0706	19.8562	20.7124	20.306	19.2087	22.9334	23.2461	K	2	___1	1	0.00207347			0.224049	0.809455	0.3246	0.476224	0.845811
P11055;P12882;P12883;P13533;Q9UKX2;Q9UKX3;Q9Y623	P11055;P12882;P12883;P13533;Q9UKX2;Q9UKX3;Q9Y623	Myosin-3;Myosin-1;Myosin-7;Myosin-6;Myosin-2;Myosin-13;Myosin-4	MYH3;MYH1;MYH7;MYH6;MYH2;MYH13;MYH4	ETDAIQRTEELEEAKKKLAQRLQAAEEHVEA;ETDAIQRTEELEEAKKKLAQRLQDAEEAVEA;ETDAIQRTEELEEAKKKLAQRLQDAEEHVEA;ETDAIQRTEELEEAKKKLAQRLQDSEEQVEA;ETDAIQRTEELEEAKKKLAQRLQEAEEAVEA;ETDAIQRTEELEEAKKKLAQRLQEAEENTET	1391	19.1926	21.0738	22.4967	22.8147	22.2746	22.7759	21.0527	21.3206	20.3746	19.7729	21.6514	22.9988	21.6966	21.5734	K	3	___1	0.610028	0.00155248			0.219382	0.81305	-0.327528	-0.469509	0.847513
Q02218;E9PCR7;A0A0D9SFS3;E9PDF2;Q02218-2;E9PFG7	Q02218	2-oxoglutarate dehydrogenase. mitochondrial	OGDH	VIPEDGPAAQNPENVKRLLFCTGKVYYDLTR	899	22.6383	23.5371	23.7258	23.8875	24.502	25.2472	23.5972	23.725	23.7587	23.9494	23.1504	24.2816	25.0722	24.6204	K	2	___1	1	1.75e-41			0.346594	0.765716	0.203229	0.577882	0.85028
A0A1B0GW44;A0A1B0GV23;A0A1B0GVD5;A0A1B0GWE8;A0A1B0GU92;A0A1B0GU03;P07339;H7C469;H7C1V0;A0A1B0GVP3	A0A1B0GW44	Cathepsin D;Cathepsin D light chain;Cathepsin D heavy chain	CTSD	MIPCEKVSTLPAITLKLGGKGYKLSPEDYTL	334	22.6581	19.7317	18.4016	25.1728	25.3706	23.647	24.0068	23.3699	20.6064	24.6737	24.6348	19.928	24.6889	24.4909	K	2	___1	1	0.000307919			0.14283	0.87618	0.486286	0.349163	0.852204
Q9UKS6;A0A0C4DGG1;E9PIY1;E9PJ75;E9PNM9	Q9UKS6	Protein kinase C and casein kinase substrate in neurons protein 3	PACSIN3	QQLADWARKWRGTVEKGPQYGTLEKAWHAFF	70	19.3814	21.2995	18.6573	22.2421	19.972	20.6045	19.4877	18.7956	20.3701	20.3364	20.2147	20.9281	20.7728	22.5711	K	2	___1	1	4.33e-16			0.203874	0.825399	0.3349	0.445921	0.85452
P40939;H0YFD6	P40939	Trifunctional enzyme subunit alpha. mitochondrial;Long-chain enoyl-CoA hydratase;Long chain 3-hydroxyacyl-CoA dehydrogenase	HADHA	CLGGPFRFVDLYGAQKIVDRLKKYEAAYGKQ	728	27.315	24.9346	27.1527	27.8335	28.9677	29.2354	27.2117	27.2739	25.565	28.8875	27.7674	23.5992	28.7638	28.0807	K	2	___1	1	1.42e-23			0.171767	0.852319	-0.387586	-0.397504	0.857878
P05976	P05976	Myosin light chain 1/3. skeletal muscle isoform	MYL1	PAPAPAPAPAKPKEEKIDLSAIKIEFSKEQQ	37	27.6147	22.7942	26.4057	28.2279	28.1761	27.4201	27.0009	27.5633	26.3605	26.9489	28.0558	26.0168	26.7849	28.2541	K	2	___1	1	0.00286225			0.19702	0.831197	0.334957	0.434576	0.859027
P06732	P06732	Creatine kinase M-type;Creatine kinase M-type. N-terminally processed	CKM	LNSLTGEFKGKYYPLKSMTEKEQQQLIDDHF	177	27.5748	27.9339	27.6606	28.5716	27.753	27.2062	26.1382	27.4103	26.6628	25.7954	28.4368	28.1105	27.2381	27.4278	K	2	___1	1	0.000335268			0.262144	0.794714	-0.250943	-0.508884	0.859442
P14618;P14618-3;B4DNK4;P14618-2;H3BR70	P14618;P14618-2	Pyruvate kinase PKM;Pyruvate kinase	PKM	AEDVDLRVNFAMNVGKARGFFKKGDVVIVLT	498	23.2571	25.0551	23.5568	23.5333	23.5116	23.9739	22.2977	24.0461	20.8214	22.816	24.1704	23.0425	23.0052	24.7444	K	2	___1	1	1.44e-10			0.180912	0.847193	-0.362786	-0.411032	0.859741
P13929;P13929-2;E5RGZ4;P13929-3;K7EKN2;K7EPM1;E5RI09;E5RG95	P13929	Beta-enolase;Enolase	ENO3	ILGVSLAVCKAGAAEKGVPLYRHIADLAGNP	126	29.2225	23.2942	28.7256	29.9023	28.6885	29.2756	28.9148	29.4869	28.4591	28.5171	29.6268	25.5622	29.0493	30.1195	K	2	___1	1	9.46e-13			0.164173	0.857605	0.399629	0.384668	0.859789
A6NHL2-2;C9J2C0;Q9NY65;Q9NY65-2;V9GZ17;P68363;P68363-2;P68366-2;P68366;A6NHL2;Q71U36;Q71U36-2;Q13748;Q9BQE3;F5H5D3	A6NHL2-2;C9J2C0;P68363;P68366-2;Q71U36;Q9BQE3	Tubulin alpha chain-like 3;Tubulin alpha-8 chain;Tubulin alpha-1B chain;Tubulin alpha-4A chain;Tubulin alpha-1A chain;Tubulin alpha-3C/D chain;Tubulin alpha-1C chain	TUBAL3;TUBA8;TUBA1B;TUBA4A;TUBA1A;TUBA3C;TUBA1C	EAWARLDHKFDLMYAKRAFLHWYLREGMEEA;EAWARLDHKFDLMYAKRAFVHWYVGEGMEEG	401	21.2931	19.4368	18.9321	21.2646	20.7433	20.001	19.8069	20.6521	19.9208	20.6349	20.8623	19.9399	20.4099	20.6835	K	2	___1	1	0.00716651			0.28205	0.788652	0.232228	0.525503	0.860003
P11217;P11217-2	P11217	Glycogen phosphorylase. muscle form	PYGM	VDRLRRMSLVEEGAVKRINMAHLCIAGSHAV	438	23.4136	23.9589	24.6353	25.5949	25.2643	25.3896	24.7723	25.2043	22.9987	23.9965	25.218	23.2516	24.8059	25.627	K	2	___1	1	1.11e-08			0.237105	0.806943	-0.275272	-0.48309	0.860462
Q99497;K7ELW0;K7EN27	Q99497	Protein deglycase DJ-1	PARK7	AIVEALNGKEVAAQVKAPLVLKD________	182	21.4582	22.24	23.6459	24.2736	24.7465	24.3008	22.4027	21.642	23.053	19.7659	22.8571	25.6606	23.5272	24.1544	K	2	___1	1	1.74e-35			0.188941	0.840458	-0.343929	-0.422355	0.861029
P07451	P07451	Carbonic anhydrase 3	CA3	LVHWNPKYNTFKEALKQRDGIAVIGIFLKIG	135	19.608	18.2699	22.3297	22.1481	23.6886	24.4059	22.947	23.3926	19.3492	23.8819	19.7064	19.0073	22.5728	22.5248	K	3	___2	1	5.11e-33			0.151144	0.868302	-0.423172	-0.361778	0.863059
Q6NZI2	Q6NZI2	Polymerase I and transcript release factor	PTRF	NFKVMIYQDEVKLPAKLSISKSLKESEALPE	165	22.827	20.095	18.323	24.2751	22.9288	23.1357	22.6903	23.4239	19.0412	21.4145	23.2929	17.6016	22.9837	23.7079	K	2	___1	1	0.00308013			0.157232	0.862897	-0.401314	-0.371745	0.86477
P12883	P12883	Myosin-7	MYH7	PLLKSAEREKEMASMKEEFTRLKEALEKSEA	853	18.105	22.1229	21.3478	22.8123	21.8243	23.6684	22.042	20.4307	22.6116	20.0423	22.4083	22.5064	22.8449	22.9576	K	2	___1	1	0.000154563			0.234382	0.809448	0.268443	0.477046	0.865131
P12882;Q9UKX2;Q9Y623	P12882;Q9UKX2;Q9Y623	Myosin-1;Myosin-2;Myosin-4	MYH1;MYH2;MYH4	LEEAGGATSAQIEMNKKREAEFQKMRRDLEE	1171	19.0307	21.9355	23.5485	24.1566	21.9914	23.9515	21.8975	21.2479	22.7424	20.6313	21.995	21.6079	21.8815	23.9055	K	2	___1	1	6.99e-57			0.175415	0.851664	-0.357171	-0.400581	0.865659
P60174-1;P60174;P60174-4;U3KPZ0	P60174-1	Triosephosphate isomerase	TPI1	TGKTATPQQAQEVHEKLRGWLKSNVSDAVAQ	188	29.0306	27.98	27.7781	28.1634	28.3838	27.8076	27.235	29.6785	23.1749	28.584	28.9949	27.1419	27.6452	28.6321	K	2	___1	1	2.01e-63			0.173332	0.851793	-0.361	-0.397335	0.865819
P43155-2;P43155;P43155-3	P43155-2	Carnitine O-acetyltransferase	CRAT	LPMPKKLRFNITPEIKSDIEKAKQNLSIMIQ	369	24.5157	23.4686	23.3248	26.6525	27.6196	27.0973	23.9299	22.5304	26.8067	24.1605	25.9998	26.8295	18.6422	28.0517	K	3	___1	1	6.06e-09			0.121987	0.892283	-0.512514	-0.306969	0.865925
B0QYF7;P02144;B0QYF8;F2Z2F1;Q8WVH6	B0QYF7;P02144	Myoglobin	MB	HHEAEIKPLAQSHATKHKIPVKYLEFISECI	97	29.479	27.4798	27.126	28.1004	27.232	27.1566	26.0699	29.677	26.9542	26.5725	28.0659	26.7756	27.6176	28.7867	K	3	___1	1	8.04e-157			0.24027	0.806972	0.257971	0.481905	0.866996
Q96HC4-2;H0YBI4;Q96HC4-3	Q96HC4-2;Q96HC4-3	PDZ and LIM domain protein 5	PDLIM5	TKKAKEKIPLHVFSPKYTKLRDWHHEVSARA	195	26.1174	18.9262	19.0641	23.0135	24.0372	22.7929	19.6472	26.1305	19.2743	20.8659	24.127	23.8331	18.9937	22.9221	K	3	___1	1	8.96e-06			0.170023	0.852168	0.364014	0.391734	0.86718
A0A0A0MTS7;Q8WZ42-12;Q8WZ42-13;Q8WZ42-11;Q8WZ42-4;Q8WZ42-7;Q8WZ42-2;Q8WZ42;Q8WZ42-8;Q8WZ42-5;A0A0A0MRA3;Q8WZ42-3;Q8WZ42-10;Q8WZ42-9	A0A0A0MTS7	Titin	TTN	SILWVKLNKTPIPQTKFKTTGLEEGVEYEFR	24967	22.2385	19.1417	23.1126	22.7413	21.7116	23.6261	20.0832	20.748	23.0827	20.6945	22.457	21.4674	23.5788	23.2545	K	2	___1	1	0.00506008			0.163774	0.859354	0.375414	0.381558	0.867995
S4R371;P05413;S4R3A2	S4R371	Fatty acid-binding protein. heart	FABP3	KPTTIIEKNGDILTLKTHSTFKNTEISFKLG	53	24.6509	20.3815	19.776	21.3268	25.073	24.6984	24.5822	25.363	21.0142	25.1445	24.7004	19.1383	23.5554	24.8403	K	2	___1	1	2.23e-29			0.130335	0.886648	0.466758	0.322623	0.869291
P06732	P06732	Creatine kinase M-type;Creatine kinase M-type. N-terminally processed	CKM	TGLRGGVHVKLAHLSKHPKFEEILTRLRLQK	304	30.4188	26.9008	27.1117	28.002	27.6966	21.6211	26.2878	30.453	25.0998	27.0042	27.8867	24.3361	27.0453	29.1341	K	3	___1	1	0.000112513			0.144075	0.876291	0.4172	0.347517	0.870747
A0A0A0MTS7;Q8WZ42-12;Q8WZ42-13;Q8WZ42-11;Q8WZ42-4;Q8WZ42-7;Q8WZ42-2;Q8WZ42;Q8WZ42-8;Q8WZ42-5;A0A0A0MRA3;Q8WZ42-3;Q8WZ42-10;Q8WZ42-9;H7C1P9	A0A0A0MTS7	Titin	TTN	LLPERKPEPKEEVVLKSVLRKRPEEEEPKVE	13518	20.0929	19.0991	19.7969	19.5911	18.4537	22.0794	21.7516	20.4688	18.9997	19.7213	20.0924	21.2191	21.3631	20.8364	K	2	___1	1	0.00593773			0.229153	0.811404	0.2623	0.467584	0.870749
P78417;Q5TA02;P78417-3	P78417	Glutathione S-transferase omega-1	GSTO1	EFRKEFTKLEEVLTNKKTTFFGGNSISMIDY	160	26.6816	26.7748	26.4079	27.2831	26.3559	25.6234	25.4261	26.2559	25.9348	25.6589	25.9908	27.3641	24.8344	26.8405	K	2	___1	1	0.000200141			0.250668	0.804931	-0.239057	-0.488813	0.871116
O95139;A0A087WZX2;O95139-2	O95139	NADH dehydrogenase [ubiquinone] 1 beta subcomplex subunit 6	NDUFB6	_______MTGYTPDEKLRLQQLRELRRRWLK	9	25.5546	22.447	23.7085	22.7581	24.2567	25.2234	23.2153	25.8696	23.5224	25.4719	24.1465	19.3917	25.267	20.8725	K	2	___1	1	0.000147182			0.158868	0.863196	-0.374571	-0.372364	0.871952
Q00872-10;Q00872-3;Q00872;Q00872-6;F8VZY0;Q00872-9;Q00872-8;F8VZE0;Q00872-5;Q00872-7;G3V1V7;Q00872-4;Q00872-2	Q00872-10;Q00872-4	Myosin-binding protein C. slow-type	MYBPC1	TEDWIVANKDLIDKTKFTITGLPTDAKIFVR	801	22.2865	22.7367	27.904	28.5899	28.0361	28.9014	28.3779	27.0864	25.3601	28.328	28.5476	24.0217	27.7787	28.5444	K	2	___1	1	1.67e-29			0.146772	0.87501	0.404914	0.351913	0.872108
P02647;F8W696	P02647	Apolipoprotein A-I;Proapolipoprotein A-I;Truncated apolipoprotein A-I	APOA1	EEVKAKVQPYLDDFQKKWQEEMELYRQKVEP	130	22.3795	19.5193	21.2844	22.6556	22.9837	21.7839	20.214	21.6585	19.5561	20.664	22.438	22.6558	22.6585	23.036	K	2	___1	1	0.00243298			0.225168	0.815018	0.263786	0.462275	0.872175
P21912	P21912	Succinate dehydrogenase [ubiquinone] iron-sulfur subunit. mitochondrial	SDHB	WMIDSRDDFTEERLAKLQDPFSLYRCHTIMN	233	23.8938	20.4759	24.3481	23.4087	25.0958	23.8422	19.3092	25.4613	18.5939	25.6857	18.8173	24.8262	19.69	24.1897	K	2	___1	1	1.7e-17			0.130737	0.886012	-0.444229	-0.322323	0.874828
P49189;P49189-2	P49189	4-trimethylaminobutyraldehyde dehydrogenase	ALDH9A1	FVQKEILDKFTEEVVKQTQRIKIGDPLLEDT	310	23.3427	25.5355	25.0642	25.0333	25.192	26.4193	25.0157	25.5287	23.9758	22.3124	25.6427	24.241	26.3004	25.505	K	3	___1	1	2.06e-99			0.192844	0.840769	-0.299528	-0.421214	0.875463
P11217;P11217-2	P11217	Glycogen phosphorylase. muscle form	PYGM	SHAVNGVARIHSEILKKTIFKDFYELEPHKF	465	26.4451	25.5264	25.1489	25.938	25.495	26.2168	25.3782	27.3377	24.1565	25.6334	26.2122	24.0932	25.1179	25.9726	K	3	___1	1	0.000375033			0.247351	0.80654	-0.232128	-0.481494	0.876159
P60709;P63261;P68032;P62736;P63267;P63267-2;P68133;A6NL76	P60709;P63261;P68032;P68133	Actin. cytoplasmic 1;Actin. cytoplasmic 1. N-terminally processed;Actin. cytoplasmic 2;Actin. cytoplasmic 2. N-terminally processed;Actin. alpha cardiac muscle 1;Actin. aortic smooth muscle;Actin. gamma-enteric smooth muscle;Actin. alpha skeletal muscle	ACTB;ACTG1;ACTC1;ACTA2;ACTG2;ACTA1	DRMQKEITALAPSTMKIKIIAPPERKYSVWI	328	31.3525	30.5171	31.4161	32.8743	32.1285	31.6908	31.7119	31.6678	31.1897	31.3552	32.0912	31.9142	32.0564	32.6027	K	2	___1	1	1.77e-10			0.336671	0.780628	0.169429	0.537919	0.876917
P36871;P36871-3;P36871-2	P36871;P36871-2	Phosphoglucomutase-1	PGM1	FTRYDYEEVEAEGANKMMKDLEALMFDRSFV	440	23.4653	20.7719	19.3499	21.6959	22.852	22.1042	21.8236	23.0354	18.3763	22.7906	21.9939	18.5422	21.5333	23.1706	K	3	___1	1	8.09e-07			0.151203	0.87075	-0.374357	-0.357901	0.877801
Q96A32;H3BPK4;H3BN54;H3BML9	Q96A32	Myosin regulatory light chain 2. skeletal muscle isoform	MYLPF	EDLRDTFAAMGRLNVKNEELDAMMKEASGPI	63	26.901	27.2208	27.6521	28.4623	27.5532	27.6477	26.6033	27.6197	26.0214	26.7182	28.1677	26.8836	26.64	28.3249	K	2	___1	1	3.3e-25			0.236607	0.812217	-0.237843	-0.469428	0.878466
Q16134;Q16134-3;D6RAD5	Q16134	Electron transfer flavoprotein-ubiquinone oxidoreductase. mitochondrial	ETFDH	DGSVKGIATNDVGIQKDGAPKATFERGLELH	223	21.0016	20.038	18.6629	20.6609	19.2841	21.5113	21.8159	20.2069	18.5641	19.6756	20.1619	20.602	21.3825	20.7448	K	2	___1	1	1.69e-07			0.239063	0.813061	-0.233843	-0.471168	0.879218
P17612-2;P17612;A0A087WVC4;A0A0A0MS54;P22694-10;P22694-4;P22694-3;P22694;P22694-5;P22694-7;P22694-6;P22694-9;P22694-2	P17612-2	cAMP-dependent protein kinase catalytic subunit alpha;cAMP-dependent protein kinase catalytic subunit beta	PRKACA;PRKACB	DLKDLLRNLLQVDLTKRFGNLKNGVNDIKNH	272	21.4258	19.4949	21.2457	22.8553	22.9129	24.3039	22.0689	22.7373	21.6712	23.7531	23.2349	20.2433	22.5436	22.3946	K	2	___1	1	9.18e-05			0.171951	0.85335	0.324371	0.390038	0.879476
P19367-4;P19367-2;P19367;P19367-3	P19367-4	Hexokinase-1	HK1	LLFEGRITPELLTRGKFNTSDVSAIEKNKEG	321	18.54	22.1585	23.5324	22.8699	22.4562	20.0416	22.8951	22.4546	20.621	23.3351	23.2019	20.2595	21.8559	23.0919	K	2	___1	1	7.16e-20			0.165576	0.858167	0.332314	0.379829	0.881002
P13929;P13929-2;E5RGZ4;P13929-3;K7EKN2;K7EPM1;E5RI09;E5RG95;K7EP84;E5RJH5	P13929	Beta-enolase;Enolase	ENO3	___________MAMQKIFAREILDSRGNPTV	5	27.3833	28.5808	28.2928	28.9819	27.9493	28.3955	27.1706	27.9699	26.6682	27.5822	28.4733	27.717	28.2482	28.4986	K	2	___1	1	0.00211626			0.239878	0.813707	-0.228115	-0.469882	0.881618
A2A274;Q99798	A2A274	Aconitate hydratase. mitochondrial	ACO2	PCIGQWDRKDIKKGEKNTIVTSYNRNFTGRN	490	22.2853	22.1807	21.7416	22.4049	21.4835	23.2428	20.2892	22.7298	23.1464	20.5748	19.7069	20.2984	22.6195	22.5027	K	2	___1	1	3.8e-14			0.186661	0.847775	-0.292785	-0.409736	0.881756
P12883;P13533	P12883;P13533	Myosin-7;Myosin-6	MYH7;MYH6	RVQLLHSQNTSLINQKKKMDADLSQLQTEVE;RVQLLHSQNTSLINQKKKMESDLTQLQSEVE	1727	27.6024	22.7316	25.6095	27.9804	28.4246	27.8525	25.9853	27.8698	24.5	27.0149	27.9012	24.9833	28.2049	27.8893	K	3	___1	1	8.05e-255			0.174729	0.851667	0.311014	0.392842	0.882382
B4DJV2;O75390;A0A0C4DGI3;H0YIC4	B4DJV2	Citrate synthase;Citrate synthase. mitochondrial	CS	HLPNDPMFKLVAQLYKIVPNVLLEQGKAKNP	369	21.8327	19.6796	23.8931	22.4785	20.8818	24.2399	20.2239	21.6973	19.4447	24.8967	26.5645	19.9391	23.4853	19.3484	K	3	___1	1	5.42e-12			0.175713	0.852482	0.306643	0.393824	0.883321
Q53GG5;A0A0A0MQY0;Q53GG5-2;A0A087WYF8	Q53GG5	PDZ and LIM domain protein 3	PDLIM3	RTKPPEGYDTVTLYPKA______________	363	19.4782	22.1139	20.44	22.6082	23.7423	22.4184	18.483	19.9901	22.1112	20.3696	21.9901	22.5817	20.5285	20.0494	K	2	___1	1	0.00290121			0.223844	0.820697	-0.237628	-0.451666	0.884725
A0A0A0MTS7;Q8WZ42-12;Q8WZ42-13;Q8WZ42-11;Q8WZ42-4;Q8WZ42-7;Q8WZ42-2;Q8WZ42;Q8WZ42-8;Q8WZ42-5;A0A0A0MRA3;Q8WZ42-3;Q8WZ42-10;Q8WZ42-9	A0A0A0MTS7	Titin	TTN	PEKDGGSPITNYIVEKRDVRRKGWQTVDTTV	16690	21.0152	21.144	22.5981	21.6435	19.9162	23.6313	22.0633	20.2283	22.9515	20.1319	22.306	21.8263	23.6964	22.8306	K	2	___1	1	0.00195117			0.189668	0.846879	0.279915	0.411993	0.88493
Q8N142;Q8N142-2	Q8N142	Adenylosuccinate synthetase isozyme 1	ADSSL1	DILDVLGEVKVGVSYKLNGKRIPYFPANQEM	380	22.8404	23.7103	22.5831	23.0242	22.5839	20.3276	20.9036	23.7233	17.3318	22.7652	23.6961	22.786	23.1472	19.8095	K	2	___1	1	2.83e-15			0.133888	0.886825	-0.387715	-0.325259	0.887339
A0A0A0MTS7;Q8WZ42-12;Q8WZ42-13;Q8WZ42-11;Q8WZ42-4;Q8WZ42-7;Q8WZ42-2;Q8WZ42;Q8WZ42-8;Q8WZ42-5;A0A0A0MRA3;Q8WZ42-3;Q8WZ42-10;Q8WZ42-9	A0A0A0MTS7	Titin	TTN	EIINYVLESRLIGTEKFHKVTNDNLLSRKYT	19330	23.1647	18.9933	21.9218	21.1847	21.1935	23.2455	22.5939	22.5421	20.9144	21.4906	21.6877	19.4499	22.2021	22.3451	K	2	___1	1	0.00197085			0.213257	0.829312	-0.237928	-0.436681	0.889734
P12882;P12883;P13533;Q9UKX2;Q9UKX3;Q9Y623	P12882;P12883;P13533;Q9UKX2;Q9UKX3;Q9Y623	Myosin-1;Myosin-7;Myosin-6;Myosin-2;Myosin-13;Myosin-4	MYH1;MYH7;MYH6;MYH2;MYH13;MYH4	SSFQTVSALFRENLNKLMTNLRSTHPHFVRC;SSFQTVSALHRENLNKLMTNLRSTHPHFVRC;SSFQTVSALHRENLNKLMTNLRTTHPHFVRC;SSFQTVSAVFRENLNKLMTNLRSTHPHFVRC	657	25.3951	18.7648	24.3008	25.682	25.853	26.1969	24.9151	24.9282	24.5179	23.9924	24.863	23.6946	25.5884	26.0263	K	2	___1	1	8.53e-08			0.139765	0.881485	0.357586	0.33445	0.891296
D6RH20;G5EA06;Q92552;Q92552-2	D6RH20	28S ribosomal protein S27. mitochondrial	MRPS27	SKLPQYLERFKALHSKLQALGKIESEGLLSL	284	20.3639	20.5546	19.6507	19.0281	21.2149	19.0841	20.8985	22.3884	19.9842	20.1758	20.4788	20.7701	20.4371	18.4683	K	2	___1	1	3.45e-08			0.183094	0.851842	0.272557	0.399738	0.891449
P53004	P53004	Biliverdin reductase A	BLVRA	DQNIFVQKLLGQFSEKELAAEKKRILHCLGL	269	25.9647	22.2397	25.5191	26.8171	27.7581	26.2713	24.9389	26.66	25.6199	26.1523	26.3925	25.4016	25.5902	25.7138	K	2	___1	1	3.42e-36			0.168196	0.85919	0.288771	0.377915	0.89419
P13929;P13929-2;E5RGZ4;P13929-3	P13929	Beta-enolase;Enolase	ENO3	DFKSPDDPARHITGEKLGELYKSFIKNYPVV	275	29.0613	22.8644	24.1755	25.1057	26.3485	24.8318	23.9961	29.6823	20.3323	26.8069	25.8129	24.3147	25.5943	25.9587	K	2	___1	1	2.02e-38			0.160319	0.865184	0.302686	0.366356	0.89428
P47756	P47756	F-actin-capping protein subunit beta	CAPZB	IVNGLRSIDAIPDNQKFKQLQRELSQVLTQR	254	19.6285	20.6936	21.6131	22.026	22.3901	22.8499	22.4325	19.9242	21.2857	21.6296	22.1301	19.9589	22.7116	22.4976	K	2	___1	1	0.000527801			0.226086	0.82346	-0.213714	-0.445275	0.89471
P13929;P13929-2;E5RGZ4;P13929-3;K7EKN2;K7EPM1;E5RI09;E5RG95	P13929	Beta-enolase;Enolase	ENO3	DSRGNPTVEVDLHTAKGRFRAAVPSGASTGI	28	25.4573	19.953	22.2321	24.8591	24.4864	24.3846	23.8384	24.6336	24.145	22.4829	24.5058	21.8863	24.1134	25.6584	K	3	___1	1	1.01e-62			0.14799	0.876857	0.316357	0.345814	0.897805
F8W914;Q9NQC3-2;Q9NQC3-5;Q9NQC3;Q9NQC3-3;Q9NQC3-4;Q9NQC3-6;A0A0U1RQR6	F8W914	Reticulon;Reticulon-4	RTN4	HYLGLANKNVKDAMAKIQAKIPGLKRKAE__	332	22.3207	21.4974	20.9533	22.4454	19.9314	20.4561	19.7328	22.4949	18.7311	20.4038	21.9831	18.3997	21.4734	21.9456	K	2	___1	1	0.000982214			0.171192	0.858911	-0.272214	-0.379982	0.898254
Q15233-2;Q15233	Q15233-2	Non-POU domain-containing octamer-binding protein	NONO	PAFNRAAPGAEFAPNKRRRY___________	378	20.2023	22.188	21.0658	21.717	21.0298	18.5867	19.9495	21.5298	19.4141	20.6491	18.9468	19.8336	20.8024	21.4187	K	2	___1	1	0.00601466			0.151293	0.875092	-0.306371	-0.350632	0.898769
P30041	P30041	Peroxiredoxin-6	PRDX6	RDFTPVCTTELGRAAKLAPEFAKRNVKLIAL	56	27.8277	19.4057	27.7262	28.2876	28.1757	28.5341	28.3459	28.2273	26.5988	27.2801	27.9262	24.4462	28.2173	28.3461	K	2	___1	1	0.00411235			0.116877	0.900084	0.3913	0.290792	0.900049
C9J406;H7C463;Q16891-2;Q16891;B9A067	C9J406;H7C463;Q16891-2	MICOS complex subunit MIC60	IMMT	IDQLNRELAEQKATEKQHITLALEKQKLEEK	416	23.795	19.6012	19.2971	21.411	21.5072	21.9175	19.514	23.7033	18.5552	18.9591	20.8008	20.3812	20.9347	22.0512	K	3	___1	1	4.05e-05			0.192105	0.849319	-0.236785	-0.404959	0.900559
P00505;P00505-2	P00505	Aspartate aminotransferase. mitochondrial	GOT2	RVGAFTMVCKDADEAKRVESQLKILIRPMYS	302	23.6745	23.1672	24.7679	24.5425	25.1717	26.1194	25.8829	25.6969	22.0563	25.2514	24.0411	24.5108	25.2178	25.0147	K	2	___1	1	3.6e-41			0.206656	0.840453	-0.219586	-0.420759	0.900785
H7BZS7;Q96PE7	H7BZS7	Methylmalonyl-CoA epimerase. mitochondrial	MCEE	MDLKKKKIRSLSEEVKIGAHGKPVIFLHPKD	52	19.2687	20.1039	23.1234	19.2139	20.8156	23.7228	20.5679	23.8473	17.6165	21.861	21.8979	21.0819	20.1976	22.8898	K	3	___1	1	0.000416087			0.122559	0.895198	0.367971	0.301079	0.901367
A0A0A0MTS7;Q8WZ42-12;Q8WZ42-13;Q8WZ42-11;Q8WZ42-4;Q8WZ42-7;Q8WZ42-2;Q8WZ42;Q8WZ42-8;Q8WZ42-5;A0A0A0MRA3;Q8WZ42-3;Q8WZ42-10;Q8WZ42-9	A0A0A0MTS7	Titin	TTN	DRTHIKTTPATLALEKIKAKRSDSGKYCVVV	19446	21.7773	17.9471	22.9007	23.3945	23.4509	24.864	23.786	20.9805	22.5626	22.0049	22.0416	19.6978	24.2966	24.1717	K	2	___1	1	0.000713467			0.133298	0.88643	-0.337829	-0.32013	0.901505
P05091;P05091-2;S4R3S4	P05091	Aldehyde dehydrogenase. mitochondrial	ALDH2	DSKTEQGPQVDETQFKKILGYINTGKQEGAK	368	18.9833	23.4241	23.7479	23.3111	23.3905	24.5602	22.0381	22.7039	22.6317	23.4389	23.0475	22.7445	23.6556	23.125	K	2	___1	1	5.43e-45			0.166373	0.862221	0.270272	0.371472	0.901642
Q9BRA2;I3L2R6	Q9BRA2	Thioredoxin domain-containing protein 17	TXNDC17	KPYWKDPNNDFRKNLKVTAVPTLLKYGTPQK	89	20.9019	25.1354	24.7952	25.6978	24.1741	24.2752	24.2313	23.2595	18.1143	24.5384	25.5752	24.9371	25.0609	25.13	K	2	___1	1	0.000294682			0.119772	0.896176	-0.370786	-0.295566	0.902797
A0A0U1RQF0;P49327	A0A0U1RQF0	Fatty acid synthase;[Acyl-carrier-protein] S-acetyltransferase;[Acyl-carrier-protein] S-malonyltransferase;3-oxoacyl-[acyl-carrier-protein] synthase;3-oxoacyl-[acyl-carrier-protein] reductase;3-hydroxyacyl-[acyl-carrier-protein] dehydratase;Enoyl-[acyl-carrier-protein] reductase;Oleoyl-[acyl-carrier-protein] hydrolase	FASN	LSLGCRVFTTVGSAEKRAYLQARFPQLDSTS	1702	23.2308	17.6905	24.1635	24.6616	23.1716	24.2453	21.674	22.5828	22.7568	23.1724	24.5858	20.4429	23.9028	23.7331	K	2	___1	1	1.85e-07			0.132142	0.888121	0.334185	0.317547	0.903317
P09382	P09382	Galectin-1	LGALS1	DQANLTVKLPDGYEFKFPNRLNLEAINYMAA	108	24.1656	23.4464	23.9166	19.1799	25.6978	24.1535	19.0584	25.2168	21.1418	26.0305	18.0009	25.3344	19.3833	22.0956	K	2	___1	1	4.8e-12			0.127076	0.891473	-0.344985	-0.308484	0.903984
P18859;P18859-2	P18859	ATP synthase-coupling factor 6. mitochondrial	ATP5J	FPTFKFEDPKFEVIEKPQA____________	105	18.8156	27.2519	27.3163	27.0721	28.3272	27.8059	26.334	26.9309	24.912	29.214	28.1194	21.8783	27.4457	27.5445	K	2	___1	1	0.000138521			0.097482	0.918305	0.445972	0.251266	0.904744
O95182	O95182	NADH dehydrogenase [ubiquinone] 1 alpha subcomplex subunit 7	NDUFA7	VSGKPAESSAVAATEKKAVTPAPPIKRWELS	92	22.4602	22.3219	22.5777	22.1743	22.5241	22.6275	21.9247	24.3709	20.9442	22.4726	23.153	21.6112	22.8149	22.7625	K	2	___1	1	3.54e-38			0.199514	0.84697	0.216986	0.409563	0.905124
P04406;P04406-2;E7EUT5	P04406	Glyceraldehyde-3-phosphate dehydrogenase	GAPDH	PSADAPMFVMGVNHEKYDNSLKIISNASCTT	139	27.4768	25.8696	26.7922	27.714	28.4694	27.1179	26.5965	28.095	25.3224	28.7177	28.7102	26.1156	27.085	27.6822	K	3	___1	1	4.8e-77			0.17845	0.857934	0.24167	0.385047	0.90547
Q5QNZ2;P24539	Q5QNZ2	ATP synthase F(0) complex subunit B1. mitochondrial	ATP5F1	QNAIDTEKSQQALVQKRHYLFDVQRNNIAMA	101	29.6109	29.8809	28.9373	28.0892	28.4463	29.7192	27.0988	31.204	26.8514	29.7481	28.5874	28.3444	30.2908	28.5482	K	2	___1	1	6.3e-15			0.167887	0.86166	0.255957	0.371165	0.905791
P11142;E9PKE3;E9PNE6;P11142-2;E9PLF4;E9PQQ4;E9PQK7;E9PK54;E9PPY6;E9PN25	P11142	Heat shock cognate 71 kDa protein	HSPA8	KNQVAMNPTNTVFDAKRLIGRRFDDAVVQSD	71	21.499	23.1896	23.0504	24.4006	24.8584	23.5666	22.4053	23.8965	21.8244	20.3509	24.3374	22.5015	24.0906	23.9598	K	2	___1	1	4.43e-53			0.149359	0.876505	-0.286972	-0.34446	0.906021
H0YK48;P09493;H0YL52;P09493-4;P09493-10;P09493-6;H0YNC7	H0YK48;P09493;P09493-4;P09493-6	Tropomyosin alpha-1 chain	TPM1	LEKSIDDLEDELYAQKLKYKAISEELDHALN	264	25.5797	24.7488	23.7833	25.6706	25.416	24.3775	22.2041	25.9821	20.1364	26.1426	26.2101	25.9882	24.299	25.2986	K	2	___1	1	0			0.131397	0.888802	0.325285	0.315276	0.906272
P60903	P60903	Protein S100-A10	S100A10	AMETMMFTFHKFAGDKGYLTKEDLRVLMEKE	23	22.9623	21.05	20.7628	22.1983	21.5875	20.3254	20.3695	21.8883	19.7872	21.1661	21.5627	19.2069	21.7714	22.1172	K	2	___1	1	0.00317769			0.170227	0.862427	-0.250856	-0.373934	0.906353
P13929;P13929-2;P13929-3	P13929	Beta-enolase	ENO3	DLTVTNPKRIAQAVEKKACNCLLLKVNQIGS	334	30.3222	23.5054	28.5918	29.0871	27.6882	28.6597	28.0507	30.6965	27.2181	28.3696	28.9596	25.481	28.3948	28.6404	K	2	___1	1	0.00645978			0.1514	0.87719	0.264986	0.344662	0.911761
A0A087X1N7;P20929-3;P20929-2;P20929-4;P20929	A0A087X1N7	Nebulin	NEB	QSEREYKKDFEKWKTKFSSPVDMLGVVLAKK	2356	22.8732	23.953	25.5203	25.2132	20.0615	25.3129	24.2172	23.1687	20.7329	25.0962	24.1151	22.7269	24.8571	24.6185	K	2	___1	1	7.1e-13			0.14945	0.879099	-0.262271	-0.34077	0.9137
I3L141;O43149-2;O43149	I3L141	Zinc finger ZZ-type and EF-hand domain-containing protein 1	ZZEF1	PVTVPTGASEEQLEKKAVQGAELSEAGNGKR	381	18.9735	22.3637	19.9907	23.1654	22.6047	23.6859	18.8939	21.1034	23.304	23.038	20.347	23.7612	19.3702	21.0423	K	2	___1	1	0.00663205			0.115484	0.904008	0.3269	0.283771	0.916744
P40939	P40939	Trifunctional enzyme subunit alpha. mitochondrial;Long-chain enoyl-CoA hydratase;Long chain 3-hydroxyacyl-CoA dehydrogenase	HADHA	EKVRKQTKGLYPAPLKIIDVVKTGIEQGSDA	303	26.3349	25.2182	25.8535	23.3489	25.5212	25.775	24.2288	26.2531	23.9901	28.0279	21.5055	24.7066	22.8119	27.0291	K	2	___1	1	0.000281513			0.132876	0.888128	-0.279471	-0.313127	0.918047
P09622;E9PEX6;P09622-3;P09622-2	P09622	Dihydrolipoyl dehydrogenase. mitochondrial;Dihydrolipoyl dehydrogenase	DLD	SKNFQRILQKQGFKFKLNTKVTGATKKSDGK	273	21.3008	19.8377	21.1933	22.125	22.996	23.8151	22.9527	23.4566	19.8056	24.6803	22.3435	19.0891	23.182	23.7129	K	2	___2	1	4.07e-11			0.124601	0.896994	0.292771	0.298857	0.919434
P09493;H0YL52;H0YKP3;A0A087WTJ7;H0YKZ6;P09493-4;P09493-10;P09493-9	P09493;P09493-4;P09493-9	Tropomyosin alpha-1 chain	TPM1	EDRSKQLEDELVSLQKKLKGTEDELDKYSEA	48	26.0924	23.0866	25.2626	26.3685	26.5335	26.4244	24.2887	26.156	25.1607	25.3886	26.4251	25.5364	24.7494	26.1811	K	2	___1	1	3.6e-208			0.163043	0.87259	0.220086	0.354844	0.920697
P25705;P25705-2;P25705-3;K7EK77;K7ENJ4	P25705	ATP synthase subunit alpha. mitochondrial	ATP5A1	DTIINQKRFNDGSDEKKKLYCIYVAIGQKRS	239	27.5336	25.075	25.5634	24.1809	24.6895	25.6473	25.7705	27.8392	23.1355	26.2399	24.472	24.1037	25.5887	25.8814	K	3	___1	1	3.94e-20			0.206757	0.851387	-0.171401	-0.399381	0.921641
P06732	P06732	Creatine kinase M-type;Creatine kinase M-type. N-terminally processed	CKM	_______MPFGNTHNKFKLNYKPEEEYPDLS	9	32.1224	29.9365	30.0488	30.8864	31.5551	30.6205	29.3182	32.6481	28.0911	30.9907	31.4629	28.6364	30.2447	30.7693	K	2	___1	1	1.75e-41			0.148537	0.880004	-0.234956	-0.334134	0.922785
P60903	P60903	Protein S100-A10	S100A10	DKGYLTKEDLRVLMEKEFPGFLENQKDPLAV	37	22.3223	22.5264	24.3996	24.8028	24.7446	24.3516	23.9432	23.3723	18.4006	25.0433	25.3228	23.237	24.9094	24.9964	K	2	___1	1	8.15e-75			0.134595	0.888684	-0.258385	-0.313449	0.923045
P00568;Q5T9B7	P00568	Adenylate kinase isoenzyme 1	AK1	GPGSGKGTQCEKIVQKYGYTHLSTGDLLRSE	31	26.2061	23.9471	23.5975	24.7392	25.2129	19.1124	20.8674	26.9394	18.7708	23.9929	24.3583	24.1077	24.2043	23.666	K	3	___1	1	6.39e-12			0.101988	0.918943	0.336686	0.25638	0.923979
B0QYF7;P02144;B0QYF8;F2Z2F1;Q8WVH6	B0QYF7;P02144	Myoglobin	MB	LGGILKKKGHHEAEIKPLAQSHATKHKIPVK	88	28.9376	20.2124	22.3891	20.6985	24.6217	20.6098	19.3802	28.2848	20.7427	20.5178	18.6186	21.0406	21.5533	23.9657	K	4	___1	1	1.9e-09			0.111674	0.909793	-0.303685	-0.274212	0.924882
P61604;B8ZZL8;S4R3N1	P61604	10 kDa heat shock protein. mitochondrial	HSPE1;HSPE1-MOB4	SAAETVTKGGIMLPEKSQGKVLQATVVAVGS	36	20.5043	19.1867	22.8738	21.9676	23.8823	20.7474	22.2084	20.3165	18.7356	20.8531	22.9344	23.2578	23.2747	23.5598	K	2	___1	1	0.0028325			0.150139	0.880738	0.223057	0.334319	0.925786
P68363;P68363-2;Q71U36;Q71U36-2;Q13748;Q13748-2;Q6PEY2;Q9BQE3;F5H5D3;A0A1W2PQM2	P68363;Q71U36;Q9BQE3	Tubulin alpha-1B chain;Tubulin alpha-1A chain;Tubulin alpha-3C/D chain;Tubulin alpha-3E chain;Tubulin alpha-1C chain	TUBA1B;TUBA1A;TUBA3C;TUBA3E;TUBA1C	GDVVPKDVNAAIATIKTKRSIQFVDWCPTGF;GDVVPKDVNAAIATIKTKRTIQFVDWCPTGF	336	21.4089	19.9072	20.3198	20.4545	21.6432	20.9708	20.5722	21.3379	21.181	21.9785	19.8926	20.1936	20.7269	21.2813	K	2	___1	1	0.00145545			0.177823	0.864959	0.187886	0.367339	0.925954
P40939;H0YFD6	P40939	Trifunctional enzyme subunit alpha. mitochondrial;Long-chain enoyl-CoA hydratase;Long chain 3-hydroxyacyl-CoA dehydrogenase	HADHA	KTSKDTSASAVAVGLKQGKVIIVVKDGPGFY	531	27.1161	23.811	27.0394	27.7214	28.6088	28.6745	27.026	24.4816	27.3629	27.8691	27.6022	26.9936	28.665	28.862	K	3	___1	1	3.26e-93			0.125719	0.896515	0.262743	0.297526	0.926762
P06732	P06732	Creatine kinase M-type;Creatine kinase M-type. N-terminally processed	CKM	KELFDPIISDRHGGYKPTDKHKTDLNHENLK	101	27.5596	24.6459	23.5426	24.8199	24.1999	24.0944	22.5598	27.7233	22.6601	24.4934	24.6768	23.1926	24.6641	25.606	K	2	___1	1	0.00038742			0.144117	0.886077	0.227743	0.325069	0.927211
P12883	P12883	Myosin-7	MYH7	QLDEKEALISQLTRGKLTYTQQLEDLKRQLE	1305	28.411	25.4533	26.3357	27.5704	27.8263	28.5938	25.3225	27.8397	27.812	27.2138	26.6301	27.3677	26.8873	27.3293	K	3	___1	1	1.89e-66			0.145755	0.886795	0.223843	0.327065	0.927628
P06733;K7EM90;K7ERS8	P06733	Alpha-enolase;Enolase	ENO1	___________MSILKIHAREIFDSRGNPTV	5	26.9223	21.1373	27.1094	27.585	28.0101	27.2364	23.396	26.4336	23.8184	24.2673	27.3421	27.0539	27.3913	26.966	K	2	___1	1	1.18e-10			0.12093	0.900891	0.268014	0.289034	0.928088
P61956-2;P61956;A8MUA9;A8MU27;Q6EEV6;P55854;P55854-2	P61956-2	Small ubiquitin-related modifier 2;Small ubiquitin-related modifier 4;Small ubiquitin-related modifier 3	SUMO2;SUMO3;SUMO4	INLKVAGQDGSVVQFKIKRHTPLSKLMKAYC	33	19.4105	20.1888	20.2905	21.9782	21.3978	20.7665	21.3072	20.8389	20.1524	19.2987	21.7547	22.372	22.0271	20.1662	K	2	___1	1	4.06e-11			0.177083	0.866726	0.181499	0.363764	0.928666
P36871	P36871	Phosphoglucomutase-1	PGM1	MVKIVTVKTQAYQDQKPGTSGLRKRVKVFQS	16	19.2205	22.2639	19.9155	21.5824	20.5355	22.256	19.7052	20.5414	20.1942	20.7711	22.1213	22.1869	21.375	19.7076	K	2	___1	1	1.69e-31			0.157304	0.879805	0.202642	0.340911	0.92923
O75947;O75947-2	O75947	ATP synthase subunit d. mitochondrial	ATP5H	AEWVSLSKARIVEYEKEMEKMKNLIPFDQMT	117	31.1859	29.4844	29.2263	29.4221	30.2383	30.7138	29.5481	31.2424	28.5661	30.758	29.9901	29.9578	30.3363	30.0473	K	2	___1	1	6.42e-05			0.202411	0.857783	0.154157	0.383902	0.930673
O75208;H3BNT2;H3BPY0	O75208	Ubiquinone biosynthesis protein COQ9. mitochondrial	COQ9	VLEEEQKLVQLGQAEKRKTDQFLRDAVETRL	175	24.6935	25.0297	25.2554	25.3228	25.7042	26.5282	22.2471	25.8731	23.5881	25.0179	25.7614	25.8272	25.9967	23.9688	K	2	___1	1	0.000268931			0.173143	0.87096	0.1789	0.35703	0.931161
A0A1C7CYY2;Q96M83-2;Q96M83-4;Q96M83-3;Q96M83-5;Q96M83	A0A1C7CYY2	Coiled-coil domain-containing protein 7	CCDC7	NIAEIVRLVQRFEELKNRLKQRSKSSVKVML	207	30.7832	25.5447	28.2911	30.2295	30.7199	28.9812	27.409	29.531	27.3648	31.226	30.9716	25.9973	29.1557	29.7259	K	3	___1	1	0.00329056			0.107257	0.914576	0.287671	0.26391	0.931419
H7C5V1;Q9BTF0-2;Q9BTF0	H7C5V1	THUMP domain-containing protein 2	THUMPD2	ENEIIAKKLKIEQMQKIEENRDCQLEKQIKE	125	20.1772	22.7466	22.0911	21.7665	22.9554	22.3182	22.3551	21.6117	19.9754	22.0544	21.6983	22.4747	22.3463	22.8649	K	2	___1	1	0.00408345			0.155674	0.881564	-0.197771	-0.336916	0.931563
P11055;P12882;Q9UKX2;Q9Y623	P11055;P12882;Q9UKX2;Q9Y623	Myosin-3;Myosin-1;Myosin-2;Myosin-4	MYH3;MYH1;MYH2;MYH4	VLNASAIPEGQFIDSKKACEKLLASIDIDHT;VLNASAIPEGQFIDSKKASEKLLASIDIDHT;VLNASAIPEGQFIDSKKASEKLLGSIDIDHT;VLNASAIPEGQFIDSKKASEKLLGSIEIDHT	745	26.7941	24.9318	27.8611	26.3067	27.5738	27.448	27.9223	23.6162	27.6602	26.9014	27.2662	26.539	27.2708	27.9293	K	3	___1	1	2.97e-42			0.12831	0.896412	-0.236386	-0.298573	0.932544
Q04446;E9PGM4	Q04446	1.4-alpha-glucan-branching enzyme	GBE1	SKSYTDYRVGTALPGKFKIVLDSDAAEYGGH	645	23.7858	24.0508	22.157	21.5142	24.703	24.3889	23.8529	24.1064	19.0033	23.3679	24.1585	22.5788	24.3706	24.8996	K	2	___1	1	0.00271827			0.107568	0.915403	-0.281072	-0.263971	0.932751
P12883	P12883	Myosin-7	MYH7	TVTVKEDQVMQQNPPKFDKIEDMAMLTFLHE	83	26.2399	24.4532	23.6644	23.4738	24.314	24.6924	23.7713	25.8629	24.7738	22.9966	23.7346	24.6956	24.4192	23.3744	K	2	___1	1	3.51e-68			0.281189	0.84382	-0.107414	-0.415435	0.932817
O75746;O75746-2;Q9UJS0;Q9UJS0-2	O75746;Q9UJS0	Calcium-binding mitochondrial carrier protein Aralar1;Calcium-binding mitochondrial carrier protein Aralar2	SLC25A12;SLC25A13	GLIPQLIGVAPEKAIKLTVNDFVRDKFTRRD;GLLPQLLGVAPEKAIKLTVNDFVRDKFMHKD	406	22.0077	19.8257	23.101	23.9208	24.1622	24.2024	19.3622	22.7093	18.8986	17.2304	24.1334	23.2982	24.2554	23.896	K	2	___1	1	4.28e-08			0.0974292	0.920544	-0.308672	-0.245011	0.933096
P12883	P12883	Myosin-7	MYH7	TRPFDLKKDVFVPDDKQEFVKAKIVSREGGK	43	26.9331	26.3257	26.3475	27.3498	26.9225	27.8227	26.8868	26.1688	26.8355	26.2473	27.1281	26.5468	27.3502	27.4842	K	2	___1	1	2.22e-05			0.253226	0.848654	-0.118172	-0.406561	0.933417
B4DJV2;O75390;A0A0C4DGI3	B4DJV2	Citrate synthase;Citrate synthase. mitochondrial	CS	FPLERPKSMSTEGLMKFVDSKSG________	446	23.7847	22.8165	24.7076	23.1935	25.6143	25.8166	23.4504	24.9987	20.2041	25.769	24.9009	24.1084	25.6472	25.3495	K	2	___1	1	5.1e-25			0.131369	0.894402	0.227743	0.30266	0.93343
Q13825;Q13825-2	Q13825	Methylglutaconyl-CoA hydratase. mitochondrial	AUH	IRVAASSAKMGLVETKLAIIPGGGGTQRLPR	211	23.8683	24.8782	23.7399	24.7634	26.5787	25.7179	24.5195	25.2628	20.5287	26.5632	25.3685	26.0385	26.2636	25.8673	K	3	___1	1	1.05e-69			0.112362	0.910791	0.260957	0.271571	0.934713
A0A0A0MTS7;Q8WZ42-12;Q8WZ42-13;Q8WZ42-11;Q8WZ42-4;Q8WZ42-7;Q8WZ42-2;Q8WZ42;Q8WZ42-8;Q8WZ42-5;A0A0A0MRA3;Q8WZ42-3;Q8WZ42-10;Q8WZ42-9	A0A0A0MTS7	Titin	TTN	PLRDGGSKIVGYSIEKRQGNERWVRCNFTDV	30461	20.4023	20.4616	20.0347	20.0927	20.6796	21.4952	19.9959	20.2037	19.5283	20.6739	21.0463	19.1223	19.9604	21.3289	K	2	___1	1	0.00532934			0.157864	0.88144	-0.185457	-0.336542	0.934809
Q08043;A0A087WSZ2	Q08043	Alpha-actinin-3	ACTN3	LSEIRRLQRLQHLAEKFRQKASLHEAWTRGK	412	25.0111	19.7484	22.1615	23.4107	23.4689	20.0426	19.2723	25.0769	17.7666	23.6674	24.1514	19.728	17.681	23.1077	K	3	___1	1	0.000336286			0.10369	0.918842	-0.276643	-0.255699	0.936084
Q14324	Q14324	Myosin-binding protein C. fast-type	MYBPC2	QEIKPSSKYVFENVGKKRILTINKCTLADDA	309	18.6696	22.3339	22.4231	22.2261	21.8489	21.9147	22.6324	20.8303	21.1961	21.2909	22.6165	22.0144	21.9466	23.4	K	2	___1	1	0.00288011			0.158777	0.881621	0.178014	0.335395	0.936991
Q96A32;H3BPK4;H3BN54;H3BML9	Q96A32	Myosin regulatory light chain 2. skeletal muscle isoform	MYLPF	EDVITGAFKVLDPEGKGTIKKKFLEELLTTQ	112	19.6916	24.0332	23.8891	23.2171	23.3641	22.7213	22.8751	22.7616	21.7585	22.617	23.6697	23.0771	20.0645	24.1534	K	2	___2	1	0.00460287			0.116901	0.907935	-0.241385	-0.27801	0.937091
A0A0A0MTS7;Q8WZ42-12;Q8WZ42-13;Q8WZ42-11;Q8WZ42-4;Q8WZ42-7;Q8WZ42-2;Q8WZ42;Q8WZ42-8;Q8WZ42-5;A0A0A0MRA3;Q8WZ42-3;Q8WZ42-10;Q8WZ42-9	A0A0A0MTS7	Titin	TTN	YDCQKSDAGKYTITLKNVAGTKEGTISIKVV	22626	19.3686	20.7398	18.8574	22.113	20.3175	23.3667	22.9303	21.2014	18.3809	21.7744	20.6141	19.2599	22.1911	22.6412	K	2	___1	1	4.86e-12			0.120385	0.903638	-0.2329	-0.283393	0.937481
P42765;A0A0B4J2A4	P42765	3-ketoacyl-CoA thiolase. mitochondrial	ACAA2	___MALLRGVFVVAAKRTPFGAYGGLLKDFT	13	27.6236	28.4267	28.0809	26.8168	29.17	29.0672	25.6742	28.0848	25.7724	29.7097	27.8664	26.873	29.811	28.4102	K	2	___1	1	0.00149332			0.117519	0.90803	0.2383	0.278769	0.937552
P26038;V9GZ54	P26038	Moesin	MSN	KVTAQDVRKESPLLFKFRAKFYPEDVSEELI	79	20.5513	18.9341	22.5513	22.866	22.8634	20.6441	19.208	22.8196	20.186	18.8841	23.5392	18.7827	23.0397	22.4165	K	2	___1	1	0.00300759			0.0955382	0.922371	0.2928	0.23997	0.937619
P40925;P40925-3;P40925-2;C9JF79;C9JRL4	P40925	Malate dehydrogenase. cytoplasmic;Malate dehydrogenase	MDH1	KANVKIFKSQGAALDKYAKKSVKVIVVGNPA	118	26.0456	26.2162	24.7728	25.9591	25.3211	24.597	23.9684	26.2439	25.5827	24.8482	25.6588	25.7065	24.0976	25.7813	K	2	___1	1	0.000802571			0.186882	0.868201	0.1484	0.360915	0.938138
P10809;E7EXB4	P10809	60 kDa heat shock protein. mitochondrial	HSPD1	SDAMKKVGRKGVITVKDGKTLNDELEIIEGM	202	25.5523	26.0719	25.9289	26.0901	25.4503	26.5721	25.8983	27.0903	20.0854	24.9826	26.9308	26.5508	27.2231	26.8057	K	2	___1	1	0.000426158			0.0995943	0.92019	-0.270743	-0.246796	0.9398
A0A0A0MTS7;Q8WZ42-12;Q8WZ42-13;Q8WZ42-11;Q8WZ42-4;Q8WZ42-7;Q8WZ42-2;Q8WZ42;Q8WZ42-8	A0A0A0MTS7	Titin	TTN	PKKPVPEKKVPPKVIKMEEPLPAKVTERHMQ	10871	18.8193	19.7847	21.9804	18.9807	18.8448	22.4827	22.0443	19.3046	19.6436	21.1119	18.3992	21.0281	22.1252	20.0196	K	2	___1	1	0.000763156			0.144506	0.889298	-0.186386	-0.31572	0.939866
P13929;P13929-2;E5RGZ4;K7EKN2;K7EPM1;E5RI09;E5RG95	P13929	Beta-enolase;Enolase	ENO3	AVENINNTLGPALLQKKLSVVDQEKVDKFMI	80	27.5039	25.392	30.7075	26.3035	19.0507	31.099	30.2507	26.794	27.132	29.9427	25.8299	19.1023	29.9194	30.4771	K	2	___1	1	7.67e-240			0.167763	0.878335	-0.158557	-0.340631	0.940589
H0YDD4;P10515;E9PEJ4	H0YDD4	Acetyltransferase component of pyruvate dehydrogenase complex;Dihydrolipoyllysine-residue acetyltransferase component of pyruvate dehydrogenase complex. mitochondrial	DLAT	GRVFVSPLAKKLAVEKGIDLTQVKGTGPDGR	200	25.6426	23.8522	26.0453	26.3281	28.6445	26.6476	26.5245	24.5603	27.0795	26.2325	26.91	26.955	26.181	27.1994	K	2	___1	1	5.28e-44			0.127721	0.899728	0.2047	0.291811	0.941576
J3KN67;D6RGJ6;P06753	J3KN67;P06753	Tropomyosin alpha-3 chain	TPM3	KENALDRAEQAEAEQKQAEERSKQLEDELAA	31	23.0474	22.4473	19.2277	22.5949	20.4712	20.5877	20.6414	23.4718	20.2639	21.077	21.4235	23.121	20.7073	20.4105	K	2	___1	1	6.11e-147			0.124223	0.902762	0.2082	0.286281	0.942186
E5RIP7;H0YBL1;P29218;P29218-3;E5RG13;E5RG94;E5RIF4;E5RHE9;E5RI82;E5RGY4;P29218-2	E5RIP7	Inositol monophosphatase 1	IMPA1	SSPVDLVTATDQKVEKMLISSIKEKYPSHSF	44	22.7175	22.5715	20.9398	24.0212	23.0665	23.4868	22.4727	23.231	21.049	22.6609	23.2957	23.0775	23.0554	24.1322	K	2	___1	1	0.000846477			0.145582	0.889315	0.1751	0.314009	0.942993
P62805	P62805	Histone H4	HIST1H4A	AKRKTVTAMDVVYALKRQGRTLYGFGG____	92	22.3282	19.0411	20.5254	21.579	22.7642	21.9079	19.6338	22.5071	18.1818	23.1773	23.5505	19.644	22.0525	20.2043	K	2	___1	1	3.03e-08			0.114171	0.910895	0.2197	0.269777	0.94388
Q9NSE4	Q9NSE4	Isoleucine--tRNA ligase. mitochondrial	IARS2	PEHVSRSIYVKFPLLKPSPKLASLIDGSSPV	277	24.2728	20.3324	23.1032	24.7037	25.1621	25.4311	24.5909	24.8378	22.2662	25.3772	24.323	21.9982	24.8013	25.5025	K	2	___1	1	0.00161188			0.115334	0.910121	0.215714	0.271338	0.944323
C9JEU5;C9JC84;P02679-2;P02679	C9JEU5	Fibrinogen gamma chain	FGG	GWTVFQKRLDGSVDFKKNWIQYKEGFGHLSP	239	24.9036	23.1733	24.1112	23.1355	22.4268	21.9221	22.2481	23.6412	21.801	23.2667	23.0282	21.2013	23.5286	24.1485	K	2	___1	1	0.00353294			0.133434	0.895727	-0.186443	-0.297487	0.944326
G3V0I5;P49821-2;P49821;E9PMX3;E9PPS5	G3V0I5	NADH dehydrogenase [ubiquinone] flavoprotein 1. mitochondrial	NDUFV1	ARVSTAPKKTSFGSLKDEDRIFTNLYGRHDW	29	26.7582	23.6024	25.9734	25.5628	27.213	27.0551	26.2532	27.5943	24.7026	27.3669	25.9968	25.0161	26.4162	26.5309	K	2	___1	1	7.29e-08			0.139847	0.894507	0.172243	0.303999	0.946046
P35573;P35573-2;P35573-3	P35573	Glycogen debranching enzyme;4-alpha-glucanotransferase;Amylo-alpha-1.6-glucosidase	AGL	HQSVVAVSRTAFRNPKTSFYSKEVPQMCIPG	755	23.497	19.7985	23.0274	23.8988	22.667	23.2277	22.2368	24.7049	21.1547	22.1459	23.1329	22.2998	22.8774	23.0884	K	2	___1	1	0.00197			0.159673	0.887618	0.150115	0.325315	0.946304
P12883;P13533	P12883;P13533	Myosin-7;Myosin-6	MYH7;MYH6	MFNWMVTRINATLETKQPRQYFIGVLDIAGF	450	22.57	23.9628	22.3723	23.6903	22.4215	23.8593	23.3224	21.8136	24.0385	21.6462	22.7036	23.0614	24.1531	23.9077	K	2	___1	1	1.09e-13			0.189702	0.876279	-0.124928	-0.348419	0.946893
A0A0C4DGA2;O75521-2;O75521;F1LLU7;F8WAW4;C9JB63;F8W6J1	A0A0C4DGA2	Enoyl-CoA delta isomerase 2. mitochondrial	ECI2	MRASQKDFENSMNQVKLLKKDPGNEVKLKLY	21	20.1592	21.5167	19.1606	20.3757	22.3114	23.2763	18.7109	21.3452	20.2676	19.6655	20.0975	22.3211	21.8025	18.9765	K	2	___1	1	7.33e-16			0.158553	0.887463	-0.147843	-0.322661	0.947456
P08590;E9PGV7	P08590	Myosin light chain 3	MYL3	PPEPERPKEVEFDASKIKIEFTPEQIEEFKE	41	24.9437	26.2158	24.6731	26.4795	27.2572	25.9858	25.212	25.3892	24.7012	24.6366	25.8918	26.3876	26.0272	26.6891	K	2	___1	1	6.62e-05			0.156393	0.887238	-0.1492	-0.320239	0.94769
P11217;P11217-2	P11217	Glycogen phosphorylase. muscle form	PYGM	LRVIFLENYRVSLAEKVIPAADLSEQISTAG	656	19.4416	20.2833	18.9702	23.818	23.4707	22.9614	22.6615	23.4701	18.8372	19.1299	24.8427	19.7913	23.3757	23.8352	K	3	___1	1	6.96e-74			0.0972535	0.921204	0.239343	0.239147	0.947814
Q9UKX2	Q9UKX2	Myosin-2	MYH2	FKAGLLGLLEEMRDDKLAQLITRTQARCRGF	786	20.3694	19.2994	22.6753	23.0864	19.541	23.5683	22.3062	22.2866	19.5126	21.5845	22.2994	22.5875	22.3872	21.571	K	2	___1	1	0.00480482			0.117404	0.911226	0.197542	0.27199	0.947999
Q06830;A0A0A0MSI0	Q06830	Peroxiredoxin-1	PRDX1	APNFKATAVMPDGQFKDISLSDYKGKYVVFF	27	20.791	21.7712	22.1143	22.9687	19.3138	21.9	20.6135	19.8215	18.5797	22.679	22.8689	19.6337	22.2695	22.297	K	2	___1	1	9.02e-17			0.121029	0.908087	-0.189028	-0.276745	0.948685
Q13228;Q13228-4;Q13228-2;Q13228-3	Q13228	Selenium-binding protein 1	SELENBP1	SVMLQVDVDTVKGGLKLNPNFLVDFGKEPLG	437	23.044	19.515	21.4453	22.8538	22.4367	19.663	19.097	22.8523	19.9496	23.3773	22.236	20.5729	19.9278	20.3166	K	2	___1	1	2.36e-07			0.135976	0.895996	0.168243	0.296547	0.948687
P00918	P00918	Carbonic anhydrase 2	CA2	AKPGLQKVVDVLDSIKTKGKSADFTNFDPRG	167	18.2593	21.1297	22.5637	23.7568	23.3917	23.5167	22.0919	22.1548	18.1121	21.5277	23.5217	23.4072	23.2103	24.3826	K	2	___1	1	0.000558489			0.0989151	0.921794	0.229515	0.241462	0.949068
E9PNP3;Q9H7C9;E9PR47;E9PJP1;E9PLK9;K4DI89;Q9H7C9-3;Q9H7C9-2	E9PNP3	Mth938 domain-containing protein	AAMDC	HSPGVQPADVKEVVEKGVQTLVIGRGMSEAL	79	20.6503	22.2217	21.9748	23.0662	20.0358	21.9514	21.7193	21.7873	19.7531	18.5304	22.433	24.4049	23.0099	23.4424	K	2	___1	1	2.63e-67			0.0900773	0.925864	0.248785	0.225203	0.949708
P40939	P40939	Trifunctional enzyme subunit alpha. mitochondrial;Long-chain enoyl-CoA hydratase;Long chain 3-hydroxyacyl-CoA dehydrogenase	HADHA	GYLCESQKFGELVMTKESKALMGLYHGQVLC	334	20.884	24.713	23.0929	19.4139	22.3864	25.6797	19.3687	22.0278	19.6827	23.2634	23.8491	22.0254	22.8521	23.8233	K	2	___1	1	3.28e-07			0.0769701	0.93265	0.2836	0.19904	0.95098
P61970;H3BRV9	P61970	Nuclear transport factor 2	NUTF2	TWEGQQFQGKAAIVEKLSSLPFQKIQHSITA	55	22.5648	18.522	24.1917	24.5259	24.7865	23.0688	22.991	23.9206	20.3547	24.9469	25.4702	19.6823	24.4054	20.1542	K	2	___1	1	5e-21			0.08898	0.927373	-0.2452	-0.222608	0.951003
A0A0A0MTS7;Q8WZ42-12;Q8WZ42-13;Q8WZ42-11;Q8WZ42-4;Q8WZ42-7;Q8WZ42-2;Q8WZ42;Q8WZ42-8;Q8WZ42-5;A0A0A0MRA3;Q8WZ42-3;Q8WZ42-10;Q8WZ42-9	A0A0A0MTS7	Titin	TTN	PLDDGGSKITNYIIEKKEVGKDVWMPVTSAS	19519	19.3712	21.0115	21.3644	20.4401	20.4903	22.0574	18.9085	20.2891	18.6278	18.8325	20.5515	20.4466	21.714	21.756	K	2	___1	1	0.000373038			0.106569	0.9205	-0.2037	-0.25299	0.951244
P50502;H7C3I1;Q3KNR6;Q8NFI4;F6VDH7;Q8IZP2	P50502	Hsc70-interacting protein;Putative protein FAM10A5;Putative protein FAM10A4	ST13;ST13P5;ST13P4	TDAIKLNPRLAILYAKRASVFVKLQKPNAAI	153	23.7076	19.6323	20.5738	21.7863	21.9544	22.4602	21.9021	22.9723	19.2241	23.6706	22.6295	19.5564	23.1001	22.1968	K	2	___1	1	0.00276148			0.110818	0.917507	0.190443	0.258673	0.952567
J3QS39;J3QTR3;F5H6Q2;F5GYU3;F5H2Z3;F5H265;B4DV12;F5H388;F5H747;F5GXK7;J3QKN0;Q5PY61;Q96C32;P62987;P62979;P0CG47;P0CG48;M0R1V7;Q49A90;J3QSA3;F5GZ39	J3QS39	Ubiquitin-60S ribosomal protein L40;Ubiquitin;60S ribosomal protein L40;Ubiquitin-40S ribosomal protein S27a;Ubiquitin;40S ribosomal protein S27a;Polyubiquitin-B;Ubiquitin;Polyubiquitin-C;Ubiquitin	UBB;RPS27A;UBC;UBA52	TITLEVEPSDTIENVKAKIQDKEGIPPDQQR	27	23.3124	24.5219	23.1277	25.7207	25.0276	25.1576	20.2268	23.0086	23.0381	25.2386	23.4383	24.7357	25.3748	23.6927	K	2	___1	1	2.39e-94			0.09966	0.921661	0.204585	0.239857	0.954138
P08758;D6RBL5;E9PHT9	P08758	Annexin A5;Annexin	ANXA5	FGRDLLDDLKSELTGKFEKLIVALMKPSRLY	76	22.4692	23.9801	19.0864	24.0676	21.5835	24.1624	23.5425	24.1866	19.7679	20.053	23.5513	22.7519	23.2928	23.8634	K	2	___1	1	0.00565173			0.0990686	0.920688	-0.203543	-0.238563	0.954631
K7EKP1;K7ERI9;K7EJI9;K7ELM9;K7EPF9;P02654	K7EKP1	Apolipoprotein C-I;Truncated apolipoprotein C-I	APOC1	SALDKLKEFGNTLEDKARELIS_________	47	22.9871	21.3289	19.074	21.4937	22.1416	20.2532	18.5015	21.7997	20.3958	19.4602	21.7355	19.1554	21.1074	20.8166	K	2	___1	1	0.000352995			0.10779	0.920113	-0.187057	-0.252483	0.954635
M0QWZ7;M0R2C6;Q9NP81;Q9NP81-2;M0R2H5;B4DJM9	M0QWZ7	Serine--tRNA ligase. mitochondrial	SARS2	ELRQLQEQIRSLEEEKAAVTEAVRALLANQD	110	22.1352	19.685	22.908	22.7845	24.7635	24.7236	23.5348	24.5662	20.9844	25.5817	23.9882	19.932	23.0972	24.0212	K	3	___1	1	2.38e-29			0.0845872	0.931036	0.233757	0.212418	0.955492
E9PF16;Q96CM8-3;Q96CM8;Q96CM8-2;Q96CM8-4	E9PF16	Acyl-CoA synthetase family member 2. mitochondrial	ACSF2	VNNSNILGERLKLHEKTPEQLRMILPNPLYH	253	25.0305	24.8361	25.5587	24.8841	25.289	26.3857	25.3233	27.7233	22.5052	27.1641	25.7482	21.1971	25.7983	25.6372	K	3	___1	1	0.00014835			0.0901314	0.926597	-0.219143	-0.22259	0.955539
P06732	P06732	Creatine kinase M-type;Creatine kinase M-type. N-terminally processed	CKM	EKLSVEALNSLTGEFKGKYYPLKSMTEKEQQ	170	25.7079	28.1613	28.1047	28.4505	28.1862	27.824	25.5266	26.506	25.9211	27.9523	27.8852	28.1568	28.0431	28.7715	K	2	___1	1	2.17e-163			0.107812	0.919824	0.182114	0.251602	0.955797
P25705;P25705-2;P25705-3;K7EK77;K7ENJ4	P25705	ATP synthase subunit alpha. mitochondrial	ATP5A1	QTGKTSIAIDTIINQKRFNDGSDEKKKLYCI	230	24.9571	22.3999	28.1538	28.3944	28.8963	29.1771	28.4754	27.0498	26.5884	30.4818	28.6993	21.8243	28.6302	29.0697	K	2	___1	1	6.49e-146			0.0710219	0.940685	0.269929	0.184985	0.956818
F6WQW2;P43487-2;P43487;C9JXG8;C9JGV6	F6WQW2	Ran-specific GTPase-activating protein	RANBP1	PELLAIRFLNAENAQKFKTKFEECRKEIEER	227	21.6674	20.1622	19.9887	20.9601	21.7292	19.509	20.1704	21.3021	19.5672	20.0975	20.8667	20.1978	20.4419	20.8407	K	2	___1	1	0.000621867			0.153462	0.89423	-0.124729	-0.303432	0.956883
Q13423;E9PCX7	Q13423	NAD(P) transhydrogenase. mitochondrial	NNT	NHFGRFFTGQITAAGKVPPAKILIVGGGVAG	224	19.2356	20.2259	21.498	21.013	22.3561	22.8721	22.7508	21.5381	18.8343	23.069	21.6331	21.313	22.2654	22.4425	K	3	___1	1	4.68e-07			0.116372	0.915143	0.163414	0.262622	0.957157
P21796;C9JI87	P21796	Voltage-dependent anion-selective channel protein 1	VDAC1	LGTEITVEDQLARGLKLTFDSSFSPNTGKKN	96	19.9974	22.6963	22.6789	19.6607	21.2669	22.2727	19.0222	19.2901	19.3206	23.7861	22.7615	19.3473	22.9121	21.6923	K	2	___1	1	2.01e-36			0.0878022	0.929622	0.216415	0.217535	0.95719
P00505;P00505-2	P00505	Aspartate aminotransferase. mitochondrial	GOT2	VDPRPEQWKEIATVVKKRNLFAFFDMAYQGF	234	19.0729	20.0875	24.0708	21.3737	24.005	24.9505	23.9687	24.4927	18.9378	26.3432	22.8271	18.3526	24.9409	23.441	K	2	___2	1	0.00269026			0.0716548	0.940568	0.258029	0.185827	0.958321
P02647;F8W696	P02647	Apolipoprotein A-I;Proapolipoprotein A-I;Truncated apolipoprotein A-I	APOA1	EYHAKATEHLSTLSEKAKPALEDLRQGLLPV	230	25.2457	19.9522	25.4207	25.5615	25.535	24.4646	24.034	24.5548	23.9324	24.0365	25.1914	23.7044	24.36	25.8125	K	2	___1	1	1.73e-54			0.0938481	0.926722	0.1969	0.22744	0.958344
P40925;P40925-3;P40925-2;B9A041;B8ZZ51	P40925	Malate dehydrogenase. cytoplasmic	MDH1	GEFVTTVQQRGAAVIKARKLSSAMSAAKAIC	236	25.1053	24.5399	23.4451	24.6135	23.7019	23.6428	20.1026	25.6195	20.2881	23.0289	23.7032	24.2312	23.4364	23.4002	K	2	___1	1	0.00821817			0.0882688	0.928828	-0.206229	-0.21741	0.958951
P30049	P30049	ATP synthase subunit delta. mitochondrial	ATP5D	TLDMLDLGAAKANLEKAQAELVGTADEATRA	136	30.0532	26.7136	29.077	28.9175	32.6593	30.7807	30.351	28.2001	30.0307	31.3593	29.8217	29.6146	30.0813	30.8841	K	3	___1	1	0			0.0880474	0.928682	0.205643	0.216894	0.959166
G3V267;G3V5T0;A0A0C4DFM0;G3V4T6;O43708-2;G3V5U6;O43708	G3V267;O43708	Maleylacetoacetate isomerase	GSTZ1	LEEMRPTPRLLPQDPKKRASVRMISDLIAGG	94	25.0684	26.6984	21.2553	24.3196	25.2702	27.8959	26.6296	26.0597	26.1168	25.7031	21.8813	21.213	27.4112	27.1683	K	2	___1	1	0.00397738			0.0800063	0.932814	-0.226286	-0.202083	0.95917
P35609;P35609-2;F6THM6	P35609	Alpha-actinin-2	ACTN2	LNEIRRLERLEHLAEKFRQKASTHETWAYGK	405	24.7322	23.8229	24.1179	24.3506	25.0427	25.1339	24.905	28.1343	21.221	25.2998	24.7677	23.8214	25.0766	25.0711	K	3	___1	1	5.55e-05			0.094474	0.925772	0.183814	0.226796	0.960803
P06732	P06732	Creatine kinase M-type;Creatine kinase M-type. N-terminally processed	CKM	CPSNLGTGLRGGVHVKLAHLSKHPKFEEILT	298	32.0849	27.2374	27.1085	27.9188	28.5904	27.6703	26.7279	31.3911	24.8314	27.5954	29.1353	28.5954	26.3226	28.353	K	3	___1	1	1.85e-13			0.108841	0.919208	-0.159143	-0.24849	0.960901
P12883;P13533	P12883;P13533	Myosin-7;Myosin-6	MYH7;MYH6	MVDVERSNAAAAALDKKQRNFDKILAEWKQK	1444	28.2914	28.0409	27.3545	28.913	28.4	28.7094	24.8129	28.5794	27.9726	27.4758	26.8119	27.7391	28.4755	28.7361	K	2	___1	1	2.44e-19			0.0955621	0.926691	0.181185	0.228482	0.960916
K7EQW8;P06753	K7EQW8;P06753	Tropomyosin alpha-3 chain	TPM4;TPM3	LEKTIDDLEDELYAQKLKYKAISEELDHALN	265	24.2545	25.4245	21.7849	24.6658	26.2046	25.6727	23.4185	24.6075	19.4198	26.3604	26.0482	26.6465	24.7915	25.2461	K	2	___1	1	1.18e-196			0.070703	0.94146	0.242071	0.182826	0.961357
O00330-3;O00330;H0YD97;O00330-2	O00330-3	Pyruvate dehydrogenase protein X component. mitochondrial	PDHX	SDSRVVDDELATRFLKSFKANLENPIRLA__	473	24.3167	19.6503	24.7115	22.695	24.6389	25.7795	23.8386	25.1007	19.3699	27.0386	23.5369	19.208	25.9538	23.96	K	2	___2	1	1.97e-79			0.0814148	0.932917	-0.208943	-0.203552	0.961588
P13805-2;P13805-3;P13805;K7EQL4;Q3B759;M0QZU8;M0QZY5;M0QX01;K7EKM3;K7ELB0	P13805-2	Troponin T. slow skeletal muscle	TNNT1	EQQRFRTEKERERQAKLAEEKMRKEEEEAKK	116	24.3137	21.8219	21.1336	22.4595	21.6635	21.2779	19.1163	24.179	20.76	20.9144	21.681	20.7781	22.4773	22.113	K	2	___1	1	0.00404506			0.106469	0.919442	0.159486	0.244392	0.961656
P17540	P17540	Creatine kinase S-type. mitochondrial	CKMT2	YLVDCEKKLERGQDIKVPPPLPQFGKK____	408	20.4292	19.3392	22.8265	23.8821	23.6588	24.202	24.1663	21.9918	22.2699	23.3005	23.2772	20.0258	23.2517	25.755	K	2	___1	1	0.000205843			0.0868423	0.931712	0.195401	0.213272	0.961681
P60709;G5E9R0;E7EVS6;C9JZR7;C9JTX5;C9JUM1;P63261;I3L3I0;I3L1U9;K7EM38;I3L3R2;J3KT65;P68032;P62736;P63267;P68133;A6NL76;C9JFL5;F6UVQ4;F6QUT6;F8WB63;B8ZZJ2	P60709;P63261;P68032;P68133	Actin. cytoplasmic 1;Actin. cytoplasmic 1. N-terminally processed;Actin. cytoplasmic 2;Actin. cytoplasmic 2. N-terminally processed;Actin. alpha cardiac muscle 1;Actin. aortic smooth muscle;Actin. gamma-enteric smooth muscle;Actin. alpha skeletal muscle	ACTB;ACTG1;ACTC1;ACTA2;ACTG2;ACTA1	GMGQKDSYVGDEAQSKRGILTLKYPIEHGII;GMGQKDSYVGDEAQSKRGILTLKYPIEHGIV	63	29.9909	28.2615	28.6754	29.3581	28.606	29.3037	28.4749	30.3375	28.5091	28.5322	29.4403	28.0612	28.3539	28.8094	K	2	___1	1	8.23e-23			0.188178	0.888043	-0.0895571	-0.312415	0.961939
C9JVN9;Q9H9P8-2;Q9H9P8;G3V5S1;G3V272	C9JVN9	L-2-hydroxyglutarate dehydrogenase. mitochondrial	L2HGDH	AVEQEEIPRLQALYEKGLQNGVPGLRLIQQE	155	21.8057	23.9013	24.6109	24.6924	25.1679	23.7649	22.4393	24.1832	18.0719	25.2591	25.0881	23.7499	25.0879	23.4253	K	2	___1	1	7.3e-121			0.0755042	0.93744	-0.216714	-0.191669	0.963024
P12883;P13533	P12883;P13533	Myosin-7;Myosin-6	MYH7;MYH6	DCDLLREQYEEETEAKAELQRVLSKANSEVA	1354	19.3969	21.0717	19.3899	21.0329	20.9192	21.2589	20.2258	23.8761	20.5618	19.3627	20.3515	20.9065	18.7987	20.7668	K	2	___1	1	2.38e-74			0.0860091	0.930701	0.189829	0.210916	0.963104
Q9Y4W6	Q9Y4W6	AFG3-like protein 2	AFG3L2	IGGLEKKTQVLQPEEKKTVAYHEAGHAVAGW	568	20.76	20.5601	20.2156	19.7006	20.8915	19.4658	21.072	21.6816	19.418	20.1578	19.9134	19.6277	20.9437	19.9927	K	2	___1	1	9.68e-05			0.121396	0.915359	-0.132957	-0.261225	0.963518
O00330-3;O00330;E9PLU0;E9PRI6	O00330-3	Pyruvate dehydrogenase protein X component. mitochondrial	PDHX	TLRFRLSPAARNILEKHSLDASQGTATGPRG	179	25.3764	21.5424	21.857	22.5201	24.2436	22.066	18.8645	25.224	22.5779	18.9594	22.3796	23.6086	21.6709	23.4091	K	3	___1	1	5.4e-107			0.082402	0.93346	0.194214	0.204091	0.963821
P00558;P00558-2	P00558	Phosphoglycerate kinase 1	PGK1	MVGVNLPQKAGGFLMKKELNYFAKALESPER	191	26.9185	26.5719	26.1244	26.0722	26.4287	26.9733	26.9604	27.5735	24.0161	26.6125	27.4012	25.629	26.3791	27.4263	K	2	___1	1	0.00212824			0.109368	0.920705	-0.144529	-0.245522	0.964258
P60174-1;P60174;P60174-4;U3KPZ0;U3KQF3	P60174-1	Triosephosphate isomerase	TPI1	CIGEKLDEREAGITEKVVFEQTKVIADNVKD	142	25.3901	23.9039	26.2173	27.5579	27.0277	27.8076	27.3291	26.3075	26.6861	26.2195	27.3182	25.2541	26.6554	27.8686	K	2	___1	1	3.46e-214			0.100472	0.924173	0.153686	0.232353	0.96507
A0A0A0MTS7;Q8WZ42-12;Q8WZ42-13;Q8WZ42-11;Q8WZ42-4;Q8WZ42-7;Q8WZ42-2;Q8WZ42;Q8WZ42-8;Q8WZ42-5	A0A0A0MTS7	Titin	TTN	RLFFVSEPQSIRVVEKTTATFIAKVGGDPIP	9712	22.4094	21.5147	22.6408	22.4992	21.0381	23.2554	23.0999	21.6212	23.4224	19.693	21.7903	22.3521	23.3339	23.1345	K	2	___1	1	3.73e-05			0.0970841	0.926171	-0.158585	-0.227257	0.96517
P05976;P05976-2	P05976;P05976-2	Myosin light chain 1/3. skeletal muscle isoform	MYL1	VRKVLGNPSNEELNAKKIEFEQFLPMMQAIS	106	28.0172	29.0334	29.0584	30.1923	28.865	28.9532	27.6879	28.2067	27.9896	27.9043	29.2906	29.9513	28.3962	29.1845	K	2	___1	1	6.22e-45			0.115955	0.918636	-0.126314	-0.25013	0.966837
Q00872-10;Q00872-3;Q00872;Q00872-6;F8VZY0;Q00872-9;Q00872-8;F8VZE0;Q00872-5;Q00872-7;G3V1V7;Q00872-4;Q00872-2	Q00872-10;Q00872-4	Myosin-binding protein C. slow-type	MYBPC1	MTTGGQSSAKLSVDLKPLKILTPLTDQTVNL	456	24.8203	19.6485	24.5882	26.413	26.501	26.814	27.0184	25.2479	24.8628	25.2556	25.8895	24.0002	25.266	26.6433	K	2	___1	1	0.00259726			0.0747728	0.939778	0.194557	0.18821	0.967058
Q14324	Q14324	Myosin-binding protein C. fast-type	MYBPC2	FKPFEYKEHDFRMAPKFLTPLIDRVVVAGYS	1049	22.9902	24.5049	25.3193	25.7022	24.1981	19.5491	19.1804	24.4464	19.1124	23.4299	25.454	22.0326	24.4089	24.2617	K	2	___1	1	0.000221692			0.059218	0.951002	0.2431	0.15664	0.967396
Q00688	Q00688	Peptidyl-prolyl cis-trans isomerase FKBP3	FKBP3	QTSAKKKKNAKPLSFKVGVGKVIRGWDEALL	165	19.7138	19.9285	19.9969	23.0241	22.8103	22.1116	22.3138	20.6561	19.1596	21.7558	22.1749	21.5001	22.5714	22.9784	K	2	___1	1	0.00233526			0.112054	0.920123	0.128185	0.244652	0.967467
Q96HC4-3	Q96HC4-3	PDZ and LIM domain protein 5	PDLIM5	QRASAAPKPEPVPVQKKTQVTNNPGTVKIPP	97	25.8712	26.192	26.3483	27.4937	26.2587	26.8521	23.7553	26.5774	25.416	25.6203	27.1375	25.95	26.4427	26.5881	K	2	___1	1	8.2e-24			0.103991	0.924307	0.137243	0.234268	0.967671
A0A0A0MTS7;Q8WZ42-12;Q8WZ42-13;Q8WZ42-11;Q8WZ42-4;Q8WZ42-7;Q8WZ42-2;Q8WZ42;Q8WZ42-8;Q8WZ42-5;A0A0A0MRA3;Q8WZ42-3;Q8WZ42-10;Q8WZ42-9	A0A0A0MTS7	Titin	TTN	SILWVKLNKTPIQDTKFKTTGLDEGLEYEFK	27131	21.0386	18.2197	20.9598	20.6231	19.6598	22.5307	22.4521	20.6486	22.114	20.7992	20.2474	19.156	21.9953	21.61	K	2	___1	1	0.00437018			0.0899088	0.930904	0.155243	0.213238	0.968372
P68402;J3KNE3	P68402	Platelet-activating factor acetylhydrolase IB subunit beta	PAFAH1B2	LPRGEKPNPLRQKNAKVNQLLKVSLPKLANV	155	21.3044	22.4409	20.8778	21.0221	20.0981	21.2508	21.221	22.2301	18.8015	19.6756	22.0696	22.3098	22.2873	22.0248	K	2	___1	1	0.00454822			0.0824618	0.932796	0.169085	0.201071	0.968405
P54725-2;P54725-3;P54725;K7ENJ0;K7ELW1;P54727;Q5W0S5;Q5W0S4	P54725-2;P54727	UV excision repair protein RAD23 homolog A;UV excision repair protein RAD23 homolog B	RAD23A;RAD23B	IEAEKGRDAFPVAGQKLIYAGKILSDDVPIR;IESEKGKDAFPVAGQKLIYAGKILNDDTALK	45	20.3785	20.3553	18.4282	23.7843	21.3359	23.169	18.7373	21.3996	19.8174	19.5103	22.8161	18.506	22.16	23.2707	K	2	___1	1	0.000525339			0.0749612	0.939421	0.184514	0.187619	0.968654
P36871;P36871-3;P36871-2	P36871;P36871-2	Phosphoglucomutase-1	PGM1	GSAGATIRLYIDSYEKDVAKINQDPQVMLAP	523	22.5415	19.6526	20.3765	21.1757	22.4211	21.2607	19.2407	23.0379	20.8587	20.6176	21.0989	19.1279	20.6225	22.4866	K	2	___1	1	0.00061824			0.081722	0.932845	0.168757	0.19955	0.968744
A0A0A0MTS7;Q8WZ42-12;Q8WZ42-13;Q8WZ42-11;Q8WZ42-4;Q8WZ42-7;Q8WZ42-2;Q8WZ42;Q8WZ42-8;Q8WZ42-5;A0A0A0MRA3;Q8WZ42-3;Q8WZ42-10;Q8WZ42-9	A0A0A0MTS7	Titin	TTN	SIDNCDRNDAGKYILKLENSSGSKSAFVTVK	26664	19.6746	18.6031	20.973	21.1578	18.6838	22.2868	22.0283	19.4261	18.9531	20.2832	19.6939	20.2314	22.077	21.9496	K	2	___1	1	4.58e-06			0.120649	0.918963	-0.1133	-0.251522	0.969015
H0YK48;P09493-5;P09493;H0YL52;P09493-4;P09493-10;P09493-6;H0YNC7	H0YK48;P09493;P09493-4;P09493-6	Tropomyosin alpha-1 chain	TPM1	ETRAEFAERSVTKLEKSIDDLEDELYAQKLK	251	27.8003	25.0868	24.478	25.1721	25.6726	24.7176	21.6373	26.0878	19.971	26.4315	25.9649	25.5586	24.1397	25.0182	K	2	___1	1	5.42e-255			0.0685602	0.944007	-0.199	-0.175229	0.969073
H0YK48;P09493-5;P09493;H0YL52;P09493-6;H0YNC7;P09493-9;Q6ZN40	H0YK48;P09493;P09493-6;P09493-9;Q6ZN40	Tropomyosin alpha-1 chain	TPM1	KTVTNNLKSLEAQAEKYSQKEDRYEEEIKVL	213	30.1827	31.1421	30.2502	31.437	30.5486	31.0185	28.813	31.2527	29.2373	30.6906	31.3644	30.844	29.8427	31.1388	K	2	___1	1	9.25e-49			0.0968379	0.924954	0.139772	0.22252	0.969315
P06753;P06753-5;P06753-4;P06753-7	P06753;P06753-5	Tropomyosin alpha-3 chain	TPM3	KNVTNNLKSLEAQAEKYSQKEDKYEEEIKIL	214	30.1827	31.1421	30.2502	31.437	30.5486	31.0185	28.813	31.2527	29.2373	30.6906	31.3644	30.844	29.8427	31.1388	K	2	___1	1	9.25e-49			0.0968379	0.925801	0.139772	0.22252	0.969315
A0A0A0MT83;P26440;H0YN10;A0A087WVD3	A0A0A0MT83	Isovaleryl-CoA dehydrogenase. mitochondrial	IVD	HLAPKAQEIDRSNEFKNLREFWKQLGNLGVL	78	22.2147	23.7934	22.2553	24.2785	24.6492	25.3413	24.0921	23.0294	24.0293	25.9092	24.7782	19.1978	26.2787	24.7817	K	2	___1	1	0.00424208			0.0678096	0.944552	0.197114	0.173443	0.969692
O95810	O95810	Serum deprivation-response protein	SDPR	EGSVKGIQNDLTKLSKYQASTSNTVSKLLEK	102	20.8615	22.5032	21.3798	22.9639	20.9254	20.1678	19.3918	21.6567	20.6674	20.6235	21.9154	20.2948	21.5003	20.632	K	2	___1	1	2.8e-05			0.100856	0.92523	-0.129043	-0.226484	0.970477
A0A0A0MTS7;Q8WZ42-12;Q8WZ42-13;Q8WZ42-11;Q8WZ42-4;Q8WZ42-7;Q8WZ42-2;Q8WZ42;Q8WZ42-8;Q8WZ42-5;A0A0A0MRA3;Q8WZ42-3;Q8WZ42-10;Q8WZ42-9	A0A0A0MTS7	Titin	TTN	LQEGTEYEFRVTAINKAGPGKPSDASKAAYA	22135	19.9967	20.5014	20.2066	20.5958	19.598	20.6493	20.5193	21.2943	21.4466	20.0648	20.9686	19.1365	18.7103	19.5954	K	2	___1	1	0.000583007			0.106356	0.924543	-0.121514	-0.233043	0.97068
P48147	P48147	Prolyl endopeptidase	PREP	YPSKDGTKIPMFIVHKKGIKLDGSHPAFLYG	457	20.7973	22.1389	19.9002	21.8274	19.7761	21.7485	20.4979	22.9401	19.5175	19.2745	21.6012	21.1153	19.383	21.7685	K	3	___1	1	0.00707539			0.0795842	0.936495	-0.155172	-0.193305	0.971965
P06753;P06753-5;P06753-4;P06753-7	P06753;P06753-5	Tropomyosin alpha-3 chain	TPM3	CSELEEELKNVTNNLKSLEAQAEKYSQKEDK	206	19.3912	17.7888	21.7402	23.2404	24.0411	23.3239	17.8953	19.0517	21.378	18.1499	19.7741	23.4156	20.3975	23.7265	K	2	___1	1	8.96e-63			0.0555469	0.950087	-0.218228	-0.146987	0.972474
F2Z337;P02144;B0QYF8;F2Z2F1;Q8WVH6	F2Z337;P02144	Myoglobin	MB	KHLKSEDEMKASEDLKKHGATVLTALGGIL_;KHLKSEDEMKASEDLKKHGATVLTALGGILK	63	18.6495	20.39	20.0948	21.9416	19.3607	21.2338	21.1997	20.875	20.5108	21.019	19.9248	19.1949	19.5378	20.8803	K	2	___2	1	0.000604707			0.0871855	0.932151	-0.1325	-0.203393	0.973751
P02545;P02545-6;P02545-3;P02545-2;Q3BDU5;P02545-5;P02545-4;Q5TCI8;H0YAB0	P02545	Prelamin-A/C;Lamin-A/C	LMNA	RTLEGELHDLRGQVAKLEAALGEAKKQLQDE	171	21.7089	21.5567	19.6874	22.1898	22.0407	22.0307	19.0749	20.9308	21.464	21.2865	20.6856	21.3148	21.5217	22.0467	K	2	___1	1	0.000241295			0.0832941	0.933894	0.137286	0.197247	0.974013
O60662;O60662-2	O60662	Kelch-like protein 41	KLHL41	RFRLMTEKYFKDHVEKDDIIKSNPDLQKKIK	238	22.1075	21.4642	19.1254	21.1262	21.8791	20.4035	18.9888	24.7297	19.8508	18.8826	19.4038	19.7912	19.923	21.4395	K	2	___1	1	6.03e-31			0.0744931	0.942246	-0.153443	-0.182892	0.974024
P06732	P06732	Creatine kinase M-type;Creatine kinase M-type. N-terminally processed	CKM	RGGVHVKLAHLSKHPKFEEILTRLRLQKRGT	307	33.6272	27.2758	28.8171	29.3646	30.0598	29.8003	29.2351	33.7995	26.7666	30.942	30.4181	27.402	28.9213	28.9918	K	3	___1	1	2.77e-08			0.0850807	0.93332	-0.134086	-0.199891	0.974074
Q14315-2;Q14315	Q14315-2	Filamin-C	FLNC	GSHPERVKVYGPGVEKTGLKANEPTYFTVDC	776	26.4891	19.3802	25.2041	26.3258	25.9576	26.7203	26.2055	26.2661	25.6297	25.2863	26.1671	21.6227	26.1117	26.55	K	2	___1	1	0.000520471			0.0579393	0.952586	0.193	0.151167	0.97458
P48735;P48735-2	P48735	Isocitrate dehydrogenase [NADP]. mitochondrial	IDH2	RNILGGTVFREPIICKNIPRLVPGWTKPITI	155	26.5799	24.1326	25.7592	27.2598	28.1972	29.1315	25.0831	29.6582	29.5528	29.0677	28.3645	24.0673	23.7727	23.205	K	3	___1	1	1.39e-11			0.0501523	0.951853	0.2207	0.134337	0.974836
B4DJV2;O75390;A0A0C4DGI3	B4DJV2	Citrate synthase;Citrate synthase. mitochondrial	CS	QEVLVWLTQLQKEVGKDVSDEKLRDYIWNTL	308	23.8344	20.5991	20.6096	20.4198	21.6039	23.0232	20.0482	27.0082	19.1936	24.0709	19.5944	19.0778	23.1663	19.1668	K	2	___2	1	1.5e-05			0.0667594	0.94631	0.162828	0.16807	0.975281
P61981	P61981	14-3-3 protein gamma;14-3-3 protein gamma. N-terminally processed	YWHAG	VATGEKRATVVESSEKAYSEAHEISKEHMQP	152	18.8042	19.518	21.4427	23.32	24.5725	22.0143	20.5586	20.4225	20.5791	23.1699	23.0079	19.9869	21.3693	22.849	K	3	___1	1	2.04e-14			0.0658902	0.947133	0.164901	0.166439	0.975292
P12956;B1AHC9;P12956-2	P12956	X-ray repair cross-complementing protein 6	XRCC6	MPFTEKIMATPEQVGKMKAIVEKLRFTYRSD	461	19.7697	21.7785	19.3241	22.8669	22.125	22.7344	21.1797	20.8672	19.1633	20.2027	22.4778	21.6277	22.5203	22.0791	K	2	___1	1	0.00127771			0.0895869	0.934047	-0.120028	-0.204416	0.975544
P17174;P17174-2	P17174	Aspartate aminotransferase. cytoplasmic	GOT1	SCASRLALGDDSPALKEKRVGGVQSLGGTGA	97	23.8418	22.7529	22.6594	24.218	24.3187	23.8861	23.6043	23.8018	22.946	23.0584	24.1037	21.8053	23.6006	25.1554	K	2	___1	1	1.97e-05			0.0914386	0.93363	-0.115715	-0.206302	0.975931
Q09666	Q09666	Neuroblast differentiation-associated protein AHNAK	AHNAK	QGPDWHLKMPKMKMPKFSMPGFKAEGPEVDV	884	23.4203	22.8502	23.0815	24.1326	24.2185	22.7323	21.2552	22.9211	19.8846	23.1452	24.5171	24.2664	23.9542	23.9473	K	2	___1	1	0.000633464			0.0743902	0.943036	0.135043	0.179768	0.977134
P00505;P00505-2	P00505	Aspartate aminotransferase. mitochondrial	GOT2	VCKDADEAKRVESQLKILIRPMYSNPPLNGA	309	28.9858	28.5264	30.9495	31.1276	32.5863	33.0904	31.4779	30.7777	30.2482	31.2169	32.1665	28.0592	32.3739	30.8333	K	3	___1	1	1.58e-68			0.0658306	0.947658	-0.1526	-0.164971	0.977134
Q9UKX2	Q9UKX2	Myosin-2	MYH2	QSKIEDEQALGIQLQKKIKELQARIEELEEE	1112	23.5616	20.7367	23.1839	24.3681	24.7717	25.2948	24.8746	23.7013	24.2839	22.7066	23.9309	22.2597	23.5834	25.3279	K	2	___1	1	2.98e-45			0.0698385	0.945195	-0.142528	-0.171918	0.977341
K7EQW8	K7EQW8		TPM4	ETRAEFAERTVAKLEKTIDDLEDELYAQKLK	26	26.0557	23.5167	22.5662	22.8499	24.415	21.4197	21.3575	24.4807	19.5574	25.3693	24.1174	24.8198	21.9084	23.0066	K	2	___1	1	1.25e-96			0.0641916	0.948611	0.154128	0.161689	0.977476
P06732	P06732	Creatine kinase M-type;Creatine kinase M-type. N-terminally processed	CKM	GEFKGKYYPLKSMTEKEQQQLIDDHFLFDKP	182	29.3154	26.2685	26.6043	27.0961	27.7467	26.3057	25.8625	29.8992	24.6992	27.7425	27.2748	27.0008	26.3001	26.9852	K	3	___1	1	1.22e-185			0.0983007	0.930917	0.100372	0.211719	0.977537
P10916;G3V1V8	P10916	Myosin regulatory light chain 2. ventricular/cardiac muscle isoform	MYL2	KLKGADPEETILNAFKVFDPEGKGVLKADYV	104	20.2604	24.9064	22.5965	20.191	22.9771	22.7533	21.0404	19.7281	19.828	24.6731	25.4116	23.6281	21.7784	18.365	K	3	___1	1	1.56e-59			0.0526089	0.949924	-0.187543	-0.138627	0.977538
P52179;P52179-2;A8MX12	P52179	Myomesin-1	MYOM1	KWREANVKAVSEEAYKISNLKENMVYQFQVA	997	19.1957	20.3945	18.9436	21.1045	21.601	22.5809	20.8494	22.3081	20.7611	18.5445	20.1441	18.5977	21.2277	22.0887	K	2	___1	1	7.2e-20			0.0684989	0.946101	-0.142529	-0.169196	0.977771
P36957;P36957-2;Q86SW4	P36957	Dihydrolipoyllysine-residue succinyltransferase component of 2-oxoglutarate dehydrogenase complex. mitochondrial	DLST	NEIDMSNIQEMRARHKEAFLKKHNLKLGFMS	267	21.6389	24.9894	26.4098	25.2558	27.3662	27.6594	26.3987	29.2528	19.0662	29.0387	26.1117	19.4199	27.7416	27.4555	K	2	___2	1	0.00225714			0.0409103	0.959845	-0.233115	-0.112097	0.97828
P12882	P12882	Myosin-1	MYH1	KMEIDDLASNMETVSKAKGNLEKMCRALEDQ	1244	22.1405	19.0787	22.359	23.4099	22.7698	23.9273	23.4381	22.5134	20.8007	21.4061	23.5348	21.5215	23.7318	24.3149	K	2	___1	1	3.23e-28			0.0940644	0.934414	0.0999854	0.204883	0.978577
P35609;P35609-2;F6THM6	P35609	Alpha-actinin-2	ACTN2	QKICDQWDRLGTLTQKRREALERMEKLLETI	499	27.6146	22.6611	27.4662	27.8415	27.9021	28.721	27.8241	28.2335	26.0456	27.2602	27.7499	26.5447	27.9529	27.1099	K	2	___1	1	3.56e-06			0.0750043	0.942339	0.123729	0.178775	0.978858
P12277;H0YJG0;H0YJK0	P12277	Creatine kinase B-type	CKB	RAGVHIKLPNLGKHEKFSEVLKRLRLQKRGT	307	25.7793	22.2468	18.6615	20.3461	23.9558	20.7227	19.3652	25.7537	18.7694	19.3548	22.1647	19.4462	22.4327	22.0012	K	2	___1	1	5.55e-06			0.0556185	0.948072	-0.164958	-0.144018	0.979096
A0A0A0MTS7;Q8WZ42-12;Q8WZ42-13;Q8WZ42-11;Q8WZ42-4;Q8WZ42-7;Q8WZ42-2;Q8WZ42;Q8WZ42-8;Q8WZ42-5;A0A0A0MRA3;Q8WZ42-3;Q8WZ42-10;Q8WZ42-9	A0A0A0MTS7	Titin	TTN	PAGSKTVSVKVLVLDKPGPPRDLEVSEIRKD	19877	21.2057	19.6117	21.9278	19.3324	18.422	23.3288	22.4781	22.4043	20.3639	19.0397	20.7969	19.436	22.5316	22.5845	K	2	___1	1	0.000591457			0.0753901	0.943016	0.121486	0.179028	0.979132
O14983-2;O14983;O14983-3	O14983-2	Sarcoplasmic/endoplasmic reticulum calcium ATPase 1	ATP2A1	RVGTTRVPLTGPVKEKIMAVIKEWGTGRDTL	544	23.9383	24.6259	23.7032	25.7904	22.9948	25.3457	19.5029	23.977	24.5388	20.3803	24.9855	23.0799	23.9561	26.201	K	2	___1	1	0.00526939			0.0518447	0.950779	0.173915	0.136076	0.979453
P04075;J3KPS3;P04075-2;H3BQN4;H3BPS8;H3BUH7;H3BR04;H3BMQ8;H3BU78	P04075	Fructose-bisphosphate aldolase A;Fructose-bisphosphate aldolase	ALDOA	LYQKADDGRPFPQVIKSKGGVVGIKVDKGVV	99	29.4803	27.6129	27.5768	27.8078	28.9758	27.2626	25.6321	27.6668	27.9114	27.7075	28.2551	27.6655	27.5345	28.4272	K	2	___1	1	9.25e-17			0.075269	0.942489	0.1171	0.177819	0.97991
G3V267;G3V5T0;A0A0C4DFM0;G3V4T6;O43708-2;A0A0A0MR33;G3V3B9;O43708;O43708-3	G3V267;O43708	Maleylacetoacetate isomerase	GSTZ1	FKVDLTPYPTISSINKRLLVLEAFQVSHPCR	191	19.9659	19.8977	22.621	22.9228	24.3699	23.7039	27.4328	23.2853	18.7098	25.6206	24.4498	18.1213	26.1474	25.8407	K	2	___1	1	3.77e-25			0.0484651	0.952897	0.180129	0.128577	0.980099
O95810	O95810	Serum deprivation-response protein	SDPR	ISLEGSVKGIQNDLTKLSKYQASTSNTVSKL	99	19.1395	19.8352	19.6359	21.2706	21.677	20.8588	19.6655	21.3512	19.649	18.5264	20.8612	21.3646	19.0282	20.5366	K	2	___1	1	0.00158275			0.0789559	0.941004	-0.109329	-0.182586	0.98032
P00338;P00338-3;P00338-5;P00338-2;F5GXY2;F5GYU2	P00338	L-lactate dehydrogenase A chain	LDHA	QRNVNIFKFIIPNVVKYSPNCKLLIVSNPVD	126	24.9718	19.5717	23.9055	26.163	23.3797	26.0563	24.6211	25.3992	22.1443	25.5831	26.1724	18.7501	26.6996	24.9327	K	2	___1	1	6.46e-22			0.0591387	0.952056	0.144614	0.149886	0.9805
A2A274;Q99798	A2A274	Aconitate hydratase. mitochondrial	ACO2	AALEPRHLGGRAIITKSFARIHETNLKKQGL	714	20.7889	24.2959	23.7167	23.25	24.8775	25.1462	19.9791	21.3697	22.1496	24.6201	23.9615	19.2446	24.7057	24.8401	K	2	___1	1	0.00447457			0.0479869	0.953908	-0.166143	-0.1267	0.98181
J3KN67;D6RGJ6;P06753;P09493;H0YL52;H0YKP3;A0A087WTJ7;P09493-4;P09493-10;P09493-9;Q6ZN40	J3KN67;P06753;P09493;P09493-4;P09493-9;Q6ZN40	Tropomyosin alpha-3 chain;Tropomyosin alpha-1 chain	TPM3;TPM1	LKGTEDELDKYSEALKDAQEKLELAEKKAAD;LKGTEDELDKYSEALKDAQEKLELAEKKATD	66	24.6268	24.0332	23.6204	25.2757	24.8433	24.2369	23.0194	25.549	23.5123	23.8364	24.546	24.6753	24.0074	24.0483	K	2	___1	1	1.29e-18			0.105836	0.933915	0.074143	0.206936	0.982094
P24298	P24298	Alanine aminotransferase 1	GPT	EGTYHFRMTILPPLEKLRLLLEKLSRFHAKF	476	20.9082	19.5464	18.8093	23.0936	23.1709	22.937	22.3343	19.5393	20.3793	22.9564	22.7093	20.0139	23.3316	22.8298	K	2	___1	1	0.00029494			0.0571304	0.948242	0.137129	0.144763	0.982123
P07305-2;P07305	P07305-2	Histone H1.0;Histone H1.0. N-terminally processed	H1F0	QAEKNRAGSSRQSIQKYIKSHYKVGENADSQ	35	20.3715	20.7597	19.9369	20.6626	20.2012	20.5322	18.6635	19.2786	18.8974	20.2208	21.7613	18.9766	21.5702	21.2144	K	2	___1	1	0.0036932			0.0675904	0.948773	0.1131	0.162379	0.982552
Q15847	Q15847	Adipogenesis regulatory factor	ADIRF	DKTANQASDTFSGIGKKFGLLK_________	70	18.9693	19.1986	21.1626	22.1979	21.3226	21.3885	18.9812	21.5788	19.6482	19.1612	21.9024	18.0557	21.5972	22.2378	K	2	___1	1	4.98e-28			0.0551353	0.949125	0.137229	0.140477	0.982729
P07305-2;P07305	P07305-2	Histone H1.0;Histone H1.0. N-terminally processed	H1F0	QIKLSIKRLVTTGVLKQTKGVGASGSFRLAK	65	19.0581	21.0685	22.5703	24.0171	22.5873	23.0998	23.2633	23.119	20.5325	21.5836	23.1903	20.571	23.9487	23.5984	K	2	___1	1	2.05e-07			0.0597657	0.951343	0.125586	0.148869	0.982866
Q9NPC6	Q9NPC6	Myozenin-2	MYOZ2	YRSFNRVATPFGGFEKASRMVKFKVPDFELL	197	21.7106	19.2221	18.7096	24.1621	25.3349	24.3204	23.3235	22.9664	21.6103	19.7917	23.889	19.759	23.5512	24.2024	K	2	___1	1	0.00011903			0.0515368	0.952233	-0.144742	-0.133277	0.98297
Q6GMV3	Q6GMV3	Putative peptidyl-tRNA hydrolase PTRHD1	PTRHD1	IALRPYPKEEVGQYLKKFRLFK_________	134	21.9158	21.3156	22.4346	21.8246	21.8426	21.9314	20.5425	22.3397	18.7757	22.0664	22.2819	22.565	22.2756	22.2089	K	2	___1	1	0.000411949			0.0728941	0.946816	0.100872	0.169324	0.983212
P49189	P49189	4-trimethylaminobutyraldehyde dehydrogenase	ALDH9A1	RGGARVEPADASGTEKAFEPATGRVIATFTC	30	20.8331	24.7071	23.7223	24.6242	25.8743	25.5595	24.0547	24.0652	23.3668	24.6865	24.2718	23.7684	25.2443	24.7902	K	3	___1	1	9.18e-95			0.062873	0.951745	0.116857	0.153829	0.983225
H0YL11;P48735;P48735-2	H0YL11;P48735	Isocitrate dehydrogenase [NADP]. mitochondrial	IDH2	KYKATDFVADRAGTFKMVFTPKDGSGVKEWE;QYKATDFVADRAGTFKMVFTPKDGSGVKEWE	193	22.2419	22.2013	24.453	22.1772	25.8294	25.8386	22.9511	23.9047	19.835	27.6014	24.54	19.5224	26.384	25.0357	K	2	___2	1	2.64e-71			0.0442162	0.956715	0.161529	0.117618	0.983689
P08670;B0YJC4;A0A1B0GTT5;P17661	P08670;P17661	Vimentin;Desmin	VIM;DES	ADAINTEFKNTRTNEKVELQELNDRFANYID;ADAVNQEFLTTRTNEKVELQELNDRFANYIE	104	22.726	22.1991	19.7887	23.6534	23.8087	22.4219	20.1851	23.356	19.9778	20.1852	23.6839	23.0462	22.1855	23.0995	K	2	___1	1	4.51e-80			0.0648548	0.950863	0.107314	0.155896	0.984102
J3KS22;Q7Z4W1;J3KSZ5;J3QL34;J3QS36	J3KS22	L-xylulose reductase	DCXR	LDMLTKVMALELGPHKIRVNAVNPTVVMTSM	169	24.6606	23.3624	22.1984	21.686	25.4753	24.9114	23.1807	25.7972	18.9076	26.1335	23.8506	20.5268	25.5965	25.7974	K	3	___1	1	2.46e-05			0.0428221	0.958252	0.162114	0.114349	0.984142
P55084;P55084-2;F5GZQ3	P55084	Trifunctional enzyme subunit beta. mitochondrial;3-ketoacyl-CoA thiolase	HADHB	IRHSRKMRKLMLDLNKAKSMGQRLSLISKFR	188	19.1989	18.7465	19.4635	21.249	22.8431	22.9746	22.9291	19.7685	19.4785	22.5036	19.337	20.9225	21.4374	23.146	K	2	___2	1	0.000376446			0.0597842	0.951208	-0.115886	-0.147444	0.984174
Q12797-4;Q12797-3	Q12797-4	Aspartyl/asparaginyl beta-hydroxylase	ASPH	VDDAKVLLEGPSGVAKRKTKAKVKELTKEEL	86	24.1034	24.6271	24.4704	24.5571	24.0687	24.2259	22.1267	24.0867	22.3275	23.4843	24.4218	24.7191	23.8316	24.5904	K	2	___1	1	4.77e-12			0.0659887	0.95139	-0.102557	-0.157004	0.984538
P32119;A6NIW5;P32119-2	P32119	Peroxiredoxin-2	PRDX2	PAPDFKATAVVDGAFKEVKLSDYKGKYVVLF	26	24.6365	22.2132	25.315	25.6337	25.6203	26.3176	25.7931	24.9465	25.5337	25.3015	25.4529	23.2795	25.9346	24.2935	K	2	___1	1	4.03e-15			0.0592294	0.948954	-0.112457	-0.145755	0.98478
P30084	P30084	Enoyl-CoA hydratase. mitochondrial	ECHS1	FATDDRKEGMTAFVEKRKANFKDQ_______	282	19.5798	19.1761	23.5956	23.6509	25.6927	24.9325	23.6799	25.0542	22.0821	18.699	22.7887	23.7712	23.131	23.7176	K	2	___1	1	0.000272728			0.0409176	0.960637	-0.151957	-0.109308	0.985785
V9GYG0;P12235	V9GYG0	ADP/ATP translocase 1	SLC25A4	QREFHGLGDCIIKIFKSDGLRGLYQGFNVSV	166	22.7847	24.151	23.8713	23.5048	24.0637	25.0805	23.9322	26.2673	19.5279	24.6912	23.7994	25.0842	25.6958	23.2095	K	2	___1	1	0.00285397			0.0478224	0.956112	0.126729	0.123399	0.986142
Q16134;Q16134-3	Q16134	Electron transfer flavoprotein-ubiquinone oxidoreductase. mitochondrial	ETFDH	LNTPVTEDRFGILTEKYRIPVPILPGLPMNN	153	22.5191	21.8616	20.1856	20.8432	20.1385	22.4362	19.651	23.3126	19.7591	21.946	21.2153	18.4201	22.935	19.3909	K	2	___1	1	0.00038183			0.0636421	0.952485	-0.0937435	-0.150431	0.986357
P17540	P17540	Creatine kinase S-type. mitochondrial	CKMT2	RGQDIKVPPPLPQFGKK______________	418	22.7655	23.7998	23.3781	24.2913	25.577	24.5036	20.888	24.3612	20.6848	22.0398	23.0595	25.1232	23.7976	25.2848	K	2	___1	1	0.000776119			0.0462674	0.956088	-0.121771	-0.119472	0.987111
A0A0A0MTS7;Q8WZ42-12;Q8WZ42-13;Q8WZ42-11;Q8WZ42-4;Q8WZ42-7;Q8WZ42-2;Q8WZ42;Q8WZ42-8;Q8WZ42-5;H7C1P9	A0A0A0MTS7	Titin	TTN	PAKVPEVPKKLIPEEKKPTPVPKKVEAPPPK	11316	21.7237	19.8565	21.6416	22.1325	20.7869	22.4138	21.8777	22.8811	21.8706	19.8882	21.3602	20.2789	22.1269	22.6399	K	3	___1	0.828216	0.00442436			0.063983	0.951739	0.087586	0.149374	0.987179
P13929;P13929-2;E5RGZ4;P13929-3	P13929	Beta-enolase;Enolase	ENO3	DPARHITGEKLGELYKSFIKNYPVVSIEDPF	281	25.8796	27.8573	28.0591	29.053	28.2645	28.2784	27.4396	27.8878	25.2982	28.102	29.2193	28.3831	27.6659	28.934	K	2	___1	1	0.000115448			0.0594537	0.948661	0.0941143	0.142595	0.987199
O60814;P57053;P62807;Q16778	O60814;P62807;Q16778	Histone H2B type 1-K;Histone H2B type F-S;Histone H2B type 1-C/E/F/G/I;Histone H2B type 2-E	HIST1H2BK;H2BFS;HIST1H2BC;HIST2H2BE	__________MPEPAKSAPAPKKGSKKAVTK	6	24.4653	23.3483	21.5226	24.3224	19.6283	22.3541	21.2594	23.8166	23.0166	21.2035	23.2006	19.1906	22.9514	22.998	K	2	___1	1	2.62e-05			0.0746172	0.949295	-0.0747283	-0.162688	0.987243
Q86TD4;Q86TD4-2;B4DYT9	Q86TD4	Sarcalumenin	SRL	RKIYHSSIKPLEQSYKYNELRQHEITDGEIT	535	22.0236	19.0268	18.9205	19.9069	22.6457	21.3515	20.2208	22.7572	19.0015	18.0704	22.0383	18.4405	21.7574	22.8425	K	2	___1	1	7.84e-27			0.0476625	0.956643	0.116	0.121949	0.98735
E9PN17;O75964	E9PN17	ATP synthase subunit g. mitochondrial	ATP5L	VEKTPALVNAAVTYSKPRLATFWYYAKVELV	24	25.2231	24.5147	24.6475	24.1627	26.9802	26.103	25.9035	26.453	23.8375	25.9346	24.7117	25.0573	25.8272	25.1333	K	2	___1	1	4.5e-75			0.066604	0.951944	-0.0828713	-0.152575	0.987371
P12882;Q9UKX2;Q9UKX3;Q9Y623	P12882;Q9UKX2;Q9UKX3;Q9Y623	Myosin-1;Myosin-2;Myosin-13;Myosin-4	MYH1;MYH2;MYH13;MYH4	ICRKGFPSRILYADFKQRYKVLNASAIPEGQ;ICRKGFPSRILYADFKQRYRILNASAIPEGQ	725	26.741	19.7626	25.0324	25.7519	25.0748	26.0083	25.0229	26.2724	24.8183	23.6306	25.514	20.3722	25.355	26.5051	K	2	___1	1	0.000362208			0.0411612	0.958715	-0.132329	-0.10872	0.987537
H3BLU7;O43488;Q8NHP1;H7C5H7	H3BLU7	Aflatoxin B1 aldehyde reductase member 2;Aflatoxin B1 aldehyde reductase member 4	AKR7A2;AKR7L	SLKPDSVRSQLETSLKRLQCPQVDLFYLHAP	118	25.0567	26.6765	25.7527	25.3246	24.9936	25.8246	25.3792	25.9275	24.2217	26.6812	25.3996	23.7735	26.467	25.9415	K	2	___1	1	0.000163067			0.0624644	0.949702	-0.0851291	-0.145891	0.987831
Q6ZMU5;Q6ZMU5-2	Q6ZMU5	Tripartite motif-containing protein 72	TRIM72	ETVRQFRGAVGEQLGKMRVFLAALEGSLDRE	178	20.383	22.3615	20.979	21.6267	22.5539	21.9671	21.1859	19.8881	20.2679	22.1245	22.4742	21.5647	22.9586	22.3751	K	2	___1	1	0.000248304			0.0619254	0.94885	0.0851427	0.144912	0.987933
P11055;P12882;P12883;P13533;Q9UKX2;Q9UKX3;Q9Y623	P11055;P12882;P12883;P13533;Q9UKX2;Q9UKX3;Q9Y623	Myosin-3;Myosin-1;Myosin-7;Myosin-6;Myosin-2;Myosin-13;Myosin-4	MYH3;MYH1;MYH7;MYH6;MYH2;MYH13;MYH4	AKKAITDAAMMAEELKKEQDTSAHLERMKKN	1770	25.3841	25.7687	25.6911	26.9409	26.9621	26.6248	25.5235	25.8685	25.7694	25.6636	26.1696	25.5563	26.413	26.9602	K	3	___1	1	3.73e-37			0.0743519	0.94886	-0.0706572	-0.160261	0.987976
P06732	P06732	Creatine kinase M-type;Creatine kinase M-type. N-terminally processed	CKM	KHNNHMAKVLTLELYKKLRDKETPSGFTVDD	40	28.907	29.9044	30.3299	31.5767	32.618	31.1788	27.506	29.6156	29.8555	32.6564	31.0488	28.9412	30.4515	30.2123	K	2	___1	1	0.000369174			0.0469379	0.956828	0.108642	0.119525	0.988327
P62807;U3KQK0;Q99880;Q99877;Q93079;P58876;Q99879;Q96A08;Q16778;Q8N257;P23527;P33778;Q5QNW6;Q5QNW6-2	P62807;Q16778;Q5QNW6	Histone H2B type 1-C/E/F/G/I;Histone H2B;Histone H2B type 1-L;Histone H2B type 1-N;Histone H2B type 1-H;Histone H2B type 1-D;Histone H2B type 1-M;Histone H2B type 1-A;Histone H2B type 2-E;Histone H2B type 3-B;Histone H2B type 1-O;Histone H2B type 1-B;Histone H2B type 2-F	HIST1H2BC;HIST1H2BN;HIST1H2BL;HIST1H2BH;HIST1H2BD;HIST1H2BM;HIST1H2BA;HIST2H2BE;HIST3H2BB;HIST1H2BO;HIST1H2BB;HIST2H2BF	ELAKHAVSEGTKAVTKYTSSK__________	121	26.6559	18.9294	22.7261	24.0608	23.2526	22.9468	23.523	25.7625	22.4669	23.3262	24.0898	22.5479	21.9219	22.6375	K	2	___1	1	0.000363379			0.0536857	0.953516	0.0940143	0.131287	0.988446
P13929;E5RGZ4;P13929-3;K7EKN2;K7EPM1	P13929	Beta-enolase;Enolase	ENO3	AMQEFMILPVGASSFKEAMRIGAEVYHHLKG	179	23.5256	25.521	26.5904	26.6594	26.5955	25.2212	25.269	25.622	20.0726	27.7148	27.6067	25.667	26.7081	26.8313	K	3	___1	1	3.97e-17			0.0419236	0.961185	0.120057	0.109553	0.988478
P23297;Q5T7Y6	P23297	Protein S100-A1;Protein S100	S100A1	LSGFLDAQKDVDAVDKVMKELDENGDGEVDF	57	23.0382	24.4906	23.5885	25.2003	23.5229	23.8717	22.5296	24.6611	23.1114	23.1091	25.0714	24.3842	22.8123	23.636	K	2	___1	1	0.0014058			0.0639145	0.950241	0.0776713	0.146072	0.988634
P08559;P08559-2;P08559-4;P08559-3;Q5JPT9;Q5JPU0;Q5JPU1;Q5JPU2	P08559	Pyruvate dehydrogenase E1 component subunit alpha. somatic form. mitochondrial	PDHA1	LVASRNFANDATFEIKKCDLHRLEEGPPVTT	39	22.3651	22.3462	22.0422	22.6326	23.7676	24.185	21.7751	23.3972	22.5387	21.4291	22.6591	22.5296	23.3865	23.7071	K	2	___1	1	4.19e-12			0.0648187	0.950758	0.0762138	0.147109	0.988689
Q16698-2;Q16698;H0YAW3	Q16698-2	2.4-dienoyl-CoA reductase. mitochondrial	DECR1	GKYGMRFNVIQPGPIKTKGAFSRLDPTGTFE	235	28.8877	27.4574	28.4731	28.9029	30.2845	29.9575	27.3032	29.6787	27.8583	30.627	25.8712	27.1144	30.2144	30.6872	K	2	___1	1	0.00023899			0.0420682	0.959121	0.112129	0.109175	0.989197
O60662;O60662-2	O60662	Kelch-like protein 41	KLHL41	TEKYFKDHVEKDDIIKSNPDLQKKIKVLKDA	243	19.4247	21.6478	21.067	22.8192	22.2337	22.5534	20.1344	19.4713	22.0869	20.4015	21.5129	22.0201	21.5937	22.2656	K	2	___1	1	2.02e-12			0.062044	0.948441	-0.0754569	-0.142021	0.989278
F2Z337;P02144;B0QYF8;F2Z2F1	F2Z337;P02144	Myoglobin	MB	EKFDKFKHLKSEDEMKASEDLKKHGATVLTA	57	18.0767	18.4066	20.0948	21.9416	20.1867	21.2338	21.1997	20.353	20.1485	19.8413	19.9747	19.9202	18.5088	21.7234	K	2	___2	1	2.07e-19			0.0487396	0.956234	-0.0957146	-0.121532	0.989316
P02545;P02545-6;P02545-3;P02545-2;Q3BDU5;P02545-5;P02545-4;Q5TCI8	P02545	Prelamin-A/C;Lamin-A/C	LMNA	QVEQYKKELEKTYSAKLDNARQSAERNSNLV	270	22.9026	25.082	23.7667	25.1233	24.0184	24.5056	23.5462	24.4672	23.4244	23.6612	24.8773	23.9872	24.9395	24.073	K	2	___1	1	5.61e-05			0.0670075	0.951447	0.0692855	0.147917	0.989367
P50461	P50461	Cysteine and glycine-rich protein 3	CSRP3	SEKCPRCGKSVYAAEKVMGGGKPWHKTCFRC	132	22.0976	24.3286	23.6446	24.5869	24.1331	24.4013	21.9875	22.8302	23.8638	21.1325	24.7921	23.8348	23.904	24.2326	K	2	___1	1	2.44e-05			0.0545087	0.953108	-0.0842288	-0.130775	0.989484
Q9UKX2	Q9UKX2	Myosin-2	MYH2	ATMKEEFQKIKDELAKSEAKRKELEEKMVTL	871	22.8763	21.007	21.5675	20.6786	18.8899	21.7164	18.9851	23.1822	22.8148	20.8946	20.7311	19.9577	19.0622	19.6625	K	2	___1	1	3.49e-06			0.0540381	0.952584	0.0834716	0.129689	0.989668
P04075;J3KPS3;P04075-2;H3BQN4;H3BPS8;H3BUH7;H3BR04;H3BMQ8	P04075	Fructose-bisphosphate aldolase A;Fructose-bisphosphate aldolase	ALDOA	___MPYQYPALTPEQKKELSDIAHRIVAPGK	13	29.1483	27.8641	27.3533	28.6013	27.9081	28.1008	24.2534	28.7256	27.3211	26.559	27.8856	27.3615	27.6736	28.3503	K	2	___1	1	1.25e-79			0.0483517	0.956893	0.0924854	0.120197	0.989756
H0YL11;P48735;P48735-2	H0YL11;P48735	Isocitrate dehydrogenase [NADP]. mitochondrial	IDH2	FVADRAGTFKMVFTPKDGSGVKEWEVYNFPA	199	22.2419	22.2013	24.453	22.1772	25.8294	25.8386	22.9511	23.9047	19.6068	27.6014	24.54	19.5224	26.384	25.0357	K	2	___2	1	2.64e-71			0.0346489	0.960856	0.128929	0.0931239	0.989766
P04075;J3KPS3;P04075-2;H3BQN4;H3BPS8;H3BUH7	P04075	Fructose-bisphosphate aldolase A;Fructose-bisphosphate aldolase	ALDOA	GKGILAADESTGSIAKRLQSIGTENTEENRR	42	29.8541	25.029	29.7596	30.7876	30.0499	30.6686	29.8075	30.0222	28.9083	29.7285	30.8592	25.829	30.3772	30.981	K	3	___1	1	4.23e-45			0.0411609	0.955261	0.107015	0.106647	0.989909
P14618;P14618-3;B4DNK4;H3BQ34;P14618-2;H3BTN5	P14618;P14618-2	Pyruvate kinase PKM;Pyruvate kinase	PKM	DFLVTEVENGGSLGSKKGVNLPGAAVDLPAV	206	24.1988	24.6998	19.813	26.0818	23.5078	25.0485	18.5641	24.527	25.3577	24.3807	23.8706	20.1035	24.0628	20.3936	K	3	___1	1	9.4e-76			0.0386748	0.957073	0.111729	0.101446	0.9901
P02545;P02545-6;P02545-3;P02545-2;Q3BDU5;P02545-5;P02545-4;Q5TCI8	P02545	Prelamin-A/C;Lamin-A/C	LMNA	AQHEDQVEQYKKELEKTYSAKLDNARQSAER	265	18.9219	19.4329	20.5964	21.9825	21.3455	21.722	22.1614	21.4407	20.2583	20.6607	21.5137	20.0826	21.6069	21.1315	K	2	___1	1	0.00468621			0.0551938	0.953165	0.0759716	0.129874	0.990391
E9PRS8;B4DKY1;P49589-2;P49589;P49589-3	E9PRS8	Cysteine--tRNA ligase. cytoplasmic	CARS	NSLTRNKEVFIPQDGKKVTWYCCGPTVYDAS	48	18.5642	22.6464	21.9361	22.4657	21.2571	22.0297	21.0986	22.4802	21.0869	19.8311	21.534	20.9222	22.0209	22.7895	K	2	___1	1	0.00435416			0.0421463	0.956734	0.095286	0.107497	0.990796
P35270	P35270	Sepiapterin reductase	SPR	VDCKVSAQKLLSLLEKDEFKSGAHVDFYDK_	247	25.2467	18.6546	24.0667	25.1721	25.3796	25.4009	24.9908	26.15	18.1677	26.8152	25.8526	21.0618	25.3237	24.8671	K	2	___1	1	1.8e-06			0.0411797	0.954654	-0.096186	-0.105505	0.990921
Q9UKX2	Q9UKX2	Myosin-2	MYH2	EASQKEARSLGTELFKIKNAYEESLDQLETL	1489	26.9238	29.0489	29.7383	30.1204	28.9862	28.8554	25.5822	27.7564	27.8959	29.8494	29.3108	26.7367	29.0706	29.2327	K	2	___1	1	8.54e-05			0.0418919	0.955395	0.0853288	0.105563	0.991803
P12882;Q9UKX2	P12882;Q9UKX2	Myosin-1;Myosin-2	MYH1;MYH2	TEQIAEGGKRIHELEKIKKQVEQEKCELQAA;TEQIAEGGKRIHELEKIKKQVEQEKSELQAA	1534	29.7606	25.8124	27.8192	27.8247	26.6363	27.6013	27.3732	29.6585	27.318	27.1653	28.0043	25.9705	26.7208	27.6007	K	2	___1	1	4.94e-05			0.0642032	0.951306	-0.0556564	-0.136394	0.991806
P00558;P00558-2	P00558	Phosphoglycerate kinase 1	PGK1	KGKDASGNKVKAEPAKIEAFRASLSKLGDVY	146	26.3474	22.8454	26.4756	27.5057	26.5173	27.1261	26.0388	26.7278	26.2099	25.8799	26.0036	23.8631	26.1602	27.3969	K	2	___1	1	0.00386037			0.0404847	0.956661	-0.0878427	-0.102925	0.991845
Q9NZJ6	Q9NZJ6	Ubiquinone biosynthesis O-methyltransferase. mitochondrial	COQ3	SMNDLRVPFIRDNLLKTIPNHQPGKPLLGMK	134	25.4516	23.7343	24.2447	24.1726	19.3445	24.7886	24.6883	25.3638	20.3969	26.3667	23.7746	18.986	25.2736	25.7087	K	3	___1	1	2.78e-17			0.0431229	0.955525	-0.0791858	-0.107102	0.992168
Q9UKX2	Q9UKX2	Myosin-2	MYH2	DELAKSEAKRKELEEKMVTLLKEKNDLQLQV	882	26.4813	21.6918	26.5613	26.5489	26.4371	27.5013	26.7285	26.4614	25.7221	27.1359	26.4366	23.8519	25.9024	27.0543	K	2	___1	1	8.48e-07			0.0387614	0.95796	0.087771	0.0991814	0.992197
Q9UKX2	Q9UKX2	Myosin-2	MYH2	RLQTESGEFSRQLDEKEALVSQLSRGKQAFT	1300	23.2591	23.6873	25.5813	24.9974	23.9464	23.651	23.8401	24.4183	19.4544	25.6145	25.1288	24.5778	24.164	25.031	K	2	___1	1	4.28e-110			0.0399372	0.956823	-0.0819713	-0.100906	0.99249
P31937	P31937	3-hydroxyisobutyrate dehydrogenase. mitochondrial	HIBADH	AAGSFAAVCSRSVASKTPVGFIGLGNMGNPM	39	22.9068	23.4279	25.8156	24.8339	25.2585	26.4502	24.5142	25.3283	18.2707	27.9029	24.3878	25.2855	26.9179	25.7669	K	3	___1	1	9.48e-41			0.0334827	0.963967	0.0932718	0.0879544	0.992835
P52179;P52179-2;A8MX12	P52179	Myomesin-1	MYOM1	PSRVSEPVAALDPAEKARLKSRPSAPWTGQI	610	19.8158	21.3548	19.4039	21.3251	21.7525	21.5588	21.944	21.7777	20.0833	19.1277	21.0936	20.4215	21.4979	22.7209	K	2	___1	1	0.000258239			0.0497556	0.957983	-0.0617572	-0.115432	0.99295
E9PLK3;P55786;A6NEC2;P55786-2;A6NEC2-2	E9PLK3;P55786-2	Puromycin-sensitive aminopeptidase;Puromycin-sensitive aminopeptidase-like protein	NPEPPS;NPEPPSL1	VCVRVYTPVGKAEQGKFALEVAAKTLPFYKD	275	22.322	20.0126	20.395	22.5027	23.4316	23.5001	21.7772	21.9899	21.3346	20.589	22.8848	21.3696	21.9484	23.3586	K	2	___1	1	0.000425517			0.0450593	0.956752	-0.0666142	-0.108188	0.993112
P07195;A8MW50;C9J7H8;F5H793	P07195	L-lactate dehydrogenase B chain;L-lactate dehydrogenase	LDHB	QHGSLFLQTPKIVADKDYSVTANSKIVVVTA	82	19.4737	24.7036	22.725	23.8577	19.8429	22.8798	23.1481	18.7154	22.302	23.2613	23.8844	23.3135	24.1678	21.5413	K	2	___1	1	2.8e-05			0.0371769	0.960382	0.0792713	0.0945998	0.993237
P04406;P04406-2;E7EUT5	P04406	Glyceraldehyde-3-phosphate dehydrogenase	GAPDH	RGALQNIIPASTGAAKAVGKVIPELNGKLTG	215	24.6058	25.9027	25.0094	27.5409	20.7337	25.7478	19.1109	23.1226	24.6778	24.6238	18.4357	25.8852	24.543	26.4469	K	2	___1	1	8.66e-26			0.0222706	0.970825	-0.130886	-0.0622491	0.993311
P12883	P12883	Myosin-7	MYH7	EETQRSVNDLTSQRAKLQTENGELSRQLDEK	1279	24.0254	23.2168	23.2597	25.2395	24.3966	23.54	24.4409	24.7302	23.4663	23.1137	22.6223	24.6117	25.0975	24.9215	K	2	___1	1	1.7e-17			0.0451447	0.955933	0.0634706	0.107486	0.993424
Q96DG6	Q96DG6	Carboxymethylenebutenolidase homolog	CMBL	NDVVIPLKDVSLLTQKLKEHCKVEYQIKTFS	193	25.0434	19.6334	27.2026	28.2877	20.2348	27.3596	28.8756	26.3148	22.1148	27.6251	27.2807	19.9425	26.7806	27.0251	K	2	___1	1	4.13e-05			0.0401353	0.958384	0.0637853	0.0978777	0.994123
P16403	P16403	Histone H1.2	HIST1H1C	SETAPAAPAAAPPAEKAPVKKKAAKKAGGTP	17	23.5447	24.0283	23.3995	25.346	25.6431	24.6157	23.2585	23.4271	22.5665	22.9452	25.1102	26.5052	24.7104	24.9319	K	3	___1	1	1.67e-18			0.0479074	0.957555	0.0515284	0.10819	0.994332
P37837	P37837	Transaldolase	TALDO1	EKLSDGIRKFAADAVKLERMLTERMFNAENG	321	21.2463	20.1295	20.823	22.7736	19.7877	22.301	21.7246	21.7179	21.5985	20.7112	21.9379	18.3698	21.8261	22.2703	K	2	___1	1	0.00275212			0.0484456	0.957909	-0.0505714	-0.108667	0.994375
P36871	P36871	Phosphoglucomutase-1	PGM1	________MVKIVTVKTQAYQDQKPGTSGLR	8	24.847	23.3305	22.2409	22.6594	24.3202	21.7026	21.2512	25.3383	19.0712	23.2771	23.1556	23.5852	22.9442	22.4868	K	3	___1	1	2.91e-49			0.0326157	0.965861	-0.0704861	-0.0834698	0.99472
P07585;P07585-2	P07585	Decorin	DCN	PLKSSGIENGAFQGMKKLSYIRIADTNITSI	200	21.357	22.9171	22.8928	24.26	22.9352	23.0549	23.0438	22.8551	22.4099	22.1596	23.2595	23.0756	23.2977	23.0877	K	2	___1	1	8.43e-17			0.0505908	0.959828	-0.0450998	-0.109283	0.99476
P12882;Q9UKX2;Q9Y623	P12882;Q9UKX2;Q9Y623	Myosin-1;Myosin-2;Myosin-4	MYH1;MYH2;MYH4	ERCDQLIKTKIQLEAKIKEVTERAEDEEEIN	924	24.9215	20.3761	24.7206	26.4444	25.9273	25.4062	23.4931	27.0006	26.4103	24.336	26.4777	19.1982	22.8227	24.3508	K	2	___1	1	0.00201146			0.0226139	0.969248	-0.0989857	-0.0621735	0.994859
Q9P2R7-2;Q9P2R7;A0A0U1RQF8;A0A0U1RQU7	Q9P2R7-2	Succinyl-CoA ligase [ADP-forming] subunit beta. mitochondrial	SUCLA2	LLQEAGVSVPKGYVAKSPDEAYAIAKKLGSK	56	23.1907	19.3928	22.284	21.3522	24.1099	24.1871	23.2828	23.9658	23.6374	19.5079	23.2057	19.613	23.7953	24.6673	K	2	___1	1	1.72e-07			0.0260421	0.970241	0.0846999	0.0698431	0.994934
P08237;P08237-2;P08237-3;H0YHB8	P08237	ATP-dependent 6-phosphofructokinase. muscle type	PFKM	DVTKAMDEKKFDEALKLRGRSFMNNWEVYKL	372	24.2094	20.3962	23.5127	24.0691	23.4998	24.2045	23.7884	24.9903	22.574	23.9788	24.2193	20.0486	23.4665	24.8556	K	2	___1	1	1.54e-31			0.0330214	0.965064	0.0647139	0.0834615	0.995092
Q96HY7	Q96HY7	Probable 2-oxoglutarate dehydrogenase E1 component DHKTD1. mitochondrial	DHTKD1	GTTFNPVIGDSSVDPKKVKTLVFCSGKHFYS	800	25.1142	25.7658	23.7259	24.1045	27.2843	27.3041	23.4348	25.6289	18.8985	26.6417	25.8263	26.0597	27.9438	26.3565	K	3	___1	1	3.86e-113			0.0236006	0.970536	0.0888288	0.0641665	0.995184
P62937;F8WE65;C9J5S7	P62937	Peptidyl-prolyl cis-trans isomerase A;Peptidyl-prolyl cis-trans isomerase A. N-terminally processed;Peptidyl-prolyl cis-trans isomerase	PPIA	DGEPLGRVSFELFADKVPKTAENFRALSTGE	28	25.4539	26.2894	25.9024	27.3408	22.985	25.5	22.9592	25.1788	23.9047	26.6999	26.2484	24.1512	24.8564	25.8216	K	2	___1	1	1.36e-06			0.0327796	0.964366	0.0614714	0.0823898	0.995371
P36957;P36957-2;Q86SW4	P36957	Dihydrolipoyllysine-residue succinyltransferase component of 2-oxoglutarate dehydrogenase complex. mitochondrial	DLST	SNIQEMRARHKEAFLKKHNLKLGFMSAFVKA	272	21.6389	24.9894	26.4098	25.2558	27.3662	27.6594	26.3987	29.2528	19.5589	29.0387	26.1117	19.8238	27.7416	27.4555	K	2	___2	1	0.00225714			0.0186763	0.969262	-0.105029	-0.0522825	0.995494
Q00872-10;Q00872-3;Q00872;Q00872-6;F8VZY0;Q00872-9;Q00872-8;F8VZE0;Q00872-5;Q00872-7;Q00872-4;Q00872-2	Q00872-10;Q00872-4	Myosin-binding protein C. slow-type	MYBPC1	QGGTVKVGEDITFIAKVKAEDLLRKPTIKWF	105	19.9731	20.9434	20.1744	18.7161	24.7896	23.3303	23.6372	19.5563	19.8884	22.8041	23.2866	18.7832	23.9088	23.9169	K	2	___1	1	3.27e-12			0.0226189	0.968363	0.0828855	0.0614364	0.995692
P00568;Q5T9B7;H0Y4J6	P00568	Adenylate kinase isoenzyme 1	AK1	RGETSGRVDDNEETIKKRLETYYKATEPVIA	147	20.201	22.8224	23.3137	24.0039	19.9676	22.0983	22.7118	25.0114	18.9543	21.755	23.1204	21.9972	22.4094	22.3928	K	2	___1	1	0.00013623			0.0244359	0.971611	0.0745427	0.065281	0.995815
P40939;H0YFD6	P40939	Trifunctional enzyme subunit alpha. mitochondrial;Long-chain enoyl-CoA hydratase;Long chain 3-hydroxyacyl-CoA dehydrogenase	HADHA	DKMQLLEIITTEKTSKDTSASAVAVGLKQGK	519	19.0699	20.7714	19.8449	20.6132	20.5996	21.5097	20.805	19.8303	20.7758	20.8612	19.0141	18.4439	21.9572	21.9767	K	3	___1	1	3.26e-93			0.0352018	0.965218	-0.0506434	-0.0848432	0.995904
H0YNP9;H0YKT9;Q8N4P3-2;Q8N4P3	H0YNP9	Guanosine-3'.5'-bis(diphosphate) 3'-pyrophosphohydrolase MESH1	HDDC3	APHSSPGAKLVKLADKLYNLRDLNRCTPEGT	123	21.1192	20.6952	19.3355	20.6983	20.034	18.735	20.8825	21.1389	18.4234	20.8948	20.4656	19.2966	20.4503	20.4719	K	2	___1	1	0.00281543			0.0340595	0.964815	-0.0511712	-0.0827591	0.995995
P55809	P55809	Succinyl-CoA:3-ketoacid coenzyme A transferase 1. mitochondrial	OXCT1	SPIKYNKDGSVAIASKPREVREFNGQHFILE	185	19.8568	21.4585	21.9865	20.0621	21.6985	19.3059	22.7819	19.4036	21.4945	19.4402	19.1913	23.6779	22.041	21.4917	K	2	___1	1	0.00181772			0.0287729	0.970097	-0.0585714	-0.0733579	0.996127
P06732	P06732	Creatine kinase M-type;Creatine kinase M-type. N-terminally processed	CKM	QLVVDGVKLMVEMEKKLEKGQSIDDMIPAQK	366	20.2433	26.4559	28.6589	26.3488	25.1731	26.9157	24.6786	25.9696	25.073	26.3016	29.1557	20.9713	21.4121	28.9588	K	3	___1	0.983138	1.19e-28			0.0185773	0.96913	-0.0903143	-0.0516079	0.996144
P11142;E9PKE3;P11142-2;E9PN89;E9PI65;P54652	P11142;P54652	Heat shock cognate 71 kDa protein;Heat shock-related 70 kDa protein 2	HSPA8;HSPA2	IINEPTAAAIAYGLDKKGCAGGEKNVLIFDL;IINEPTAAAIAYGLDKKVGAERNVLIFDLGG	187	24.1061	19.7474	25.1131	26.9668	26.0518	26.1784	23.8129	24.6765	22.7712	26.0812	25.9514	21.6624	25.4762	24.9053	K	3	___1	1	3.32e-27			0.0251603	0.971761	-0.0646144	-0.0660827	0.996264
P11217;P11217-2	P11217	Glycogen phosphorylase. muscle form	PYGM	______MSRPLSDQEKRKQISVRGLAGVENV	10	25.008	19.0015	23.1672	18.9172	22.9408	23.0956	23.2673	26.5895	18.6942	21.4025	24.5691	20.2491	20.3123	24.0926	K	2	___1	1	6.14e-06			0.0221098	0.968013	0.0731002	0.0596051	0.996285
P08133;P08133-2;E5RK69;E7EMC6	P08133	Annexin A6;Annexin	ANXA6	RLILGLMMPPAHYDAKQLKKAMEGAGTDEKA	442	23.6924	19.6854	22.9812	24.2876	24.3523	24.0508	20.46	22.8133	21.2882	23.1853	23.5953	23.2171	23.15	22.599	K	3	___1	1	1.25e-07			0.0333053	0.964619	0.0483576	0.0805263	0.996298
A0A1B0GWJ0;A0A1B0GTJ7;P30566;A0A0A6YY92;P30566-2;A0A1B0GTG9;A0A1B0GWF8;A0A096LNY6;A0A096LPA2	A0A1B0GWJ0	Adenylosuccinate lyase	ADSL	EPFEKQQIGSSAMPYKRNPMRSERCCSLARH	295	24.4514	21.6174	22.3592	22.8022	22.4065	22.9441	21.5507	24.3656	21.2363	22.4672	23.7215	21.4774	22.3074	22.8103	K	2	___1	1	0.00017821			0.0416717	0.96267	0.0363146	0.090116	0.996522
P35609;P35609-2;Q08043;A0A087WSZ2	P35609;Q08043	Alpha-actinin-2;Alpha-actinin-3	ACTN2;ACTN3	GERLPKPDRGKMRFHKIANVNKALDYIASKG;GERLPRPDKGKMRFHKIANVNKALDFIASKG	96	19.4037	19.6818	18.6231	19.8588	21.1102	19.9452	20.762	19.7304	20.5108	19.9957	18.9295	19.7536	19.0653	21.1247	K	2	___1	1	0.00271641			0.0350693	0.965189	-0.0392573	-0.0806785	0.996835
P06744;A0A0A0MTS2;P06744-2;K7EQ48;A0A0J9YXP8;A0A0J9YYH3;A0A0J9YX90;K7EP41;K7EPY4;K7ELR7	P06744	Glucose-6-phosphate isomerase	GPI	SRGVEAARERMFNGEKINYTEGRAVLHVALR	89	22.367	20.6059	19.5054	19.8185	20.185	20.977	20.7402	21.9253	19.4734	18.2723	22.1194	20.3017	20.061	22.3658	K	2	___1	1	1.4e-11			0.029643	0.969944	0.0457006	0.072605	0.996886
P00441;H7BYH4	P00441	Superoxide dismutase [Cu-Zn]	SOD1	SGDHCIIGRTLVVHEKADDLGKGGNEESTKT	123	25.0717	23.9088	24.2315	25.1127	25.745	25.0011	24.3644	27.8758	21.257	25.1359	24.969	25.2521	24.3932	24.8975	K	2	___1	1	9.95e-29			0.026856	0.971378	0.0493281	0.0676719	0.996954
A0A087WXS0;P48788-2;P48788	A0A087WXS0	Troponin I. fast skeletal muscle	TNNI2	RDLRDVGDWRKNIEEKSGMEGRKKMFESES_	168	27.0913	24.8047	25.9668	26.5356	24.9845	25.307	25.1972	27.6678	23.672	25.0585	26.2122	25.4764	25.6054	25.9638	K	2	___1	1	0.000204647			0.0399257	0.965722	-0.0329999	-0.0853027	0.996971
O14983-2;O14983;O14983-3	O14983-2	Sarcoplasmic/endoplasmic reticulum calcium ATPase 1	ATP2A1	VYCSPAKSSRAAVGNKMFVKGAPEGVIDRCN	511	21.0182	23.4109	23.7679	24.8242	22.9942	23.6261	23.3713	22.779	23.9738	21.4177	24.1769	22.0726	23.6121	24.6703	K	2	___1	1	0.00015865			0.0285977	0.970652	-0.0443429	-0.070173	0.997084
P06576;H0YH81;F8W079	P06576	ATP synthase subunit beta. mitochondrial;ATP synthase subunit beta	ATP5B	GLVRGQKVLDSGAPIKIPVGPETLGRIMNVI	133	30.4423	26.1531	31.4479	30.3127	30.5676	31.0078	31.2538	28.0482	29.7418	32.7126	30.8699	27.8212	30.902	30.703	K	3	___1	1	3.51e-98			0.0229132	0.96919	-0.0552142	-0.0599063	0.997091
O75947	O75947	ATP synthase subunit d. mitochondrial	ATP5H	PVPEDKYTAQVDAEEKEDVKSCAEWVSLSKA	95	29.1229	29.055	28.8241	28.6053	29.8658	30.47	29.4273	30.3122	28.1334	29.6536	28.9696	29.2268	29.7678	29.5308	K	2	___1	1	2.45e-30			0.0358536	0.965451	0.0319715	0.0783227	0.997364
O60662;O60662-2	O60662	Kelch-like protein 41	KLHL41	LSEVFDCIRFRLMTEKYFKDHVEKDDIIKSN	230	22.9449	23.0645	24.3569	25.0754	25.1112	24.9467	23.67	24.9703	22.8743	23.9032	25.1185	22.1119	24.9061	24.9814	K	2	___1	1	0.00380489			0.024779	0.968497	-0.0434143	-0.0621435	0.997526
P67936;K7EMU5;K7EPV9;K7EPB9;P67936-2	P67936;P67936-2	Tropomyosin alpha-4 chain	TPM4	KNVTNNLKSLEAASEKYSEKEDKYEEEIKLL	213	20.7715	21.4784	21.7704	24.4094	24.2052	23.6761	20.3417	20.4748	21.1338	21.8545	23.6214	24.4048	21.8538	23.6125	K	2	___1	1	0.00706908			0.0248397	0.970036	0.0432717	0.0622411	0.997528
E9PRK2;Q96I59-2;Q96I59	E9PRK2	Probable asparagine--tRNA ligase. mitochondrial	NARS2	LFQLEWGADLRTEHEKYLVKHCGNIPVFVIN	209	18.925	19.7361	20.9723	19.3914	21.2191	19.7247	20.6718	20.6688	21.5749	19.8085	19.6499	17.3101	21.0182	20.9496	K	2	___1	1	0.00647193			0.0214701	0.967288	0.0485145	0.0558078	0.997604
E9PNP3;Q9H7C9;E9PR47;E9PIQ4	E9PNP3	Mth938 domain-containing protein	AAMDC	MSEALKVPSSTVEYLKKHGIDVRVLQTEQAV	105	23.2977	18.9967	22.4268	24.1575	24.265	24.0918	23.7369	24.3331	21.7166	22.2887	23.9143	21.2726	23.8108	23.9384	K	2	___1	1	1.25e-07			0.0227226	0.968023	0.0431573	0.057735	0.997745
P40939	P40939	Trifunctional enzyme subunit alpha. mitochondrial;Long-chain enoyl-CoA hydratase;Long chain 3-hydroxyacyl-CoA dehydrogenase	HADHA	ALMGLYHGQVLCKKNKFGAPQKDVKHLAILG	353	28.6398	27.7858	27.4265	27.7675	27.1357	27.7712	27.4409	29.3431	25.4657	28.3836	27.5253	27.6991	27.9686	27.3477	K	2	___1	1	0.00171458			0.0276874	0.971154	-0.0334718	-0.0650809	0.997868
P12882	P12882	Myosin-1	MYH1	QSKIEDEQALGMQLQKKIKELQARIEELEEE	1110	23.4345	19.804	21.9508	23.5517	19.8495	23.3024	23.7573	24.1933	19.613	20.8142	23.5648	20.4162	23.0857	24.1349	K	2	___1	1	3.83e-30			0.0354102	0.969506	0.0245568	0.0723151	0.998
A0A0A0MSE2;A0A0D9SFP2;E9PF18;Q16836;Q16836-3;Q16836-2;A0A1W2PNM1;A0A1W2PQV5;A0A1W2PQC2;A0A1W2PRT2	A0A0A0MSE2	Hydroxyacyl-coenzyme A dehydrogenase. mitochondrial	HADH	HFFNPVPVMKLVEVIKTPMTSQKTFESLVDF	185	29.2572	28.9266	29.0331	28.8717	30.2422	29.7116	28.8641	29.917	26.3264	30.4502	29.4031	28.7186	30.2617	30.0955	K	3	___1	1	4.04e-27			0.0227522	0.967181	0.0379998	0.0567669	0.998011
P05976;P05976-2	P05976;P05976-2	Myosin light chain 1/3. skeletal muscle isoform	MYL1	EFKEAFLLFDRTGDSKITLSQVGDVLRALGT	69	25.55	25.7183	29.5359	28.8199	29.1335	27.6782	27.3079	25.7631	25.3379	28.0275	28.7195	29.6884	27.4734	28.9355	K	2	___1	1	9.61e-143			0.0273435	0.971381	0.0288001	0.062495	0.998188
P20774;Q5TBF5	P20774	Mimecan	OGN	LKLPVLPPKLTLFNAKYNKIKSRGIKANAFK	195	24.0484	20.324	20.9114	22.9676	22.4701	22.6122	22.1769	23.9075	18.8564	22.1525	23.1011	22.743	22.6947	21.8722	K	2	___1	1	0.000124875			0.0294851	0.970878	-0.0261715	-0.0646577	0.998225
P81605;P81605-2	P81605	Dermcidin;Survival-promoting peptide;DCD-1	DCD	RQAPKPRKQRSSLLEKGLDGAKKAVGGLGKL	68	25.2695	23.1444	24.1273	24.5616	24.3011	23.7881	23.4103	24.8823	24.6038	22.7067	24.4129	23.26	24.3202	24.6263	K	2	___1	1	0.000266821			0.0248152	0.968049	0.029986	0.058467	0.998288
P30041	P30041	Peroxiredoxin-6	PRDX6	LAILLGMLDPAEKDEKGMPVTARVVFVFGPD	125	23.8014	21.1761	21.9731	22.7201	20.8424	21.5707	22.0123	24.2768	21.1421	20.2769	22.4221	21.5267	22.4138	22.2154	K	2	___1	1	0.000937609			0.0268276	0.96845	0.0253854	0.0598719	0.998433
P10916;G3V1V8	P10916	Myosin regulatory light chain 2. ventricular/cardiac muscle isoform	MYL2	NDLRDTFAALGRVNVKNEEIDEMIKEAPGPI	62	25.1671	25.2918	24.5183	26.4484	26.6424	26.3363	24.9379	25.8482	24.3659	24.7189	25.534	27.2273	25.8279	25.9826	K	2	___1	1	1.26e-36			0.0261292	0.967445	0.0232285	0.0574725	0.998603
P40939;H0YFD6	P40939	Trifunctional enzyme subunit alpha. mitochondrial;Long-chain enoyl-CoA hydratase;Long chain 3-hydroxyacyl-CoA dehydrogenase	HADHA	AVAVGLKQGKVIIVVKDGPGFYTTRCLAPMM	540	22.925	23.3724	24.0112	24.2243	25.4404	25.5626	24.8399	23.4154	21.0944	25.5637	24.7088	24.2905	26.0138	25.0893	K	2	___1	1	5.22e-30			0.0202491	0.97072	-0.0285568	-0.0492774	0.998669
O00330-3;O00330	O00330-3	Pyruvate dehydrogenase protein X component. mitochondrial	PDHX	RGIFTKEDALKLVQLKQTGKITESRPTPAPT	208	24.6158	21.5217	19.0575	19.5014	23.341	23.2718	22.6844	24.2359	17.6889	20.3259	22.5814	23.1093	22.2549	23.5479	K	2	___1	1	0.00219778			0.0148147	0.979332	-0.0356287	-0.0390277	0.998785
A0A0A0MTS7;Q8WZ42-12;Q8WZ42-13;Q8WZ42-11;Q8WZ42-4;Q8WZ42-7;Q8WZ42-2;Q8WZ42;Q8WZ42-8;Q8WZ42-5;A0A0A0MRA3;Q8WZ42-3;Q8WZ42-10;Q8WZ42-9	A0A0A0MTS7	Titin	TTN	GKKTSARLFVTGIRLKFMSPLEDQTVKEGET	14143	20.642	19.7163	19.6099	20.7876	19.0185	22.8395	22.2781	19.9292	21.5911	19.1494	20.3184	19.9936	21.7575	22.3049	K	2	___1	1	0.000129161			0.0186543	0.975216	0.0217432	0.0438695	0.999066
P10412;P16402;P16403	P10412;P16402;P16403	Histone H1.4;Histone H1.3;Histone H1.2	HIST1H1E;HIST1H1D;HIST1H1C	AKRKASGPPVSELITKAVAASKERSGVSLAA;GKRKASGPPVSELITKAVAASKERSGVSLAA;TPRKASGPPVSELITKAVAASKERSGVSLAA	46	24.395	26.02	24.1824	27.8573	27.1234	26.4137	26.5238	24.9133	22.974	26.3093	27.1179	27.2502	26.9986	27.1381	K	2	___1	1	4.27e-94			0.0148422	0.978766	0.0265429	0.0376761	0.999093
Q9NP98	Q9NP98	Myozenin-1	MYOZ1	_____MPLSGTPAPNKKRKSSKLIMELTGGG	11	18.4662	21.781	19.7184	22.2171	20.5753	20.8875	20.8578	20.8195	20.3614	19.0967	21.4455	23.3248	19.4198	20.2205	K	2	___1	1	1.16e-05			0.0133775	0.979872	0.0264146	0.0344669	0.999187
P12883;P13533	P12883;P13533	Myosin-7;Myosin-6	MYH7;MYH6	LEEAGGATSVQIEMNKKREAEFQKMRRDLEE	1165	19.913	20.1966	19.1174	21.1368	21.1771	21.7504	20.6825	20.5725	20.8234	19.9949	18.711	21.3235	20.9326	21.7678	K	2	___1	1	1.79e-27			0.0155608	0.979403	0.0216999	0.0379533	0.999223
P54296	P54296	Myomesin-2	MYOM2	YRNIQTRYLLDEYASKKRASTQASSQKSLSQ	35	22.5058	21.6041	21.5376	22.4145	21.8539	22.416	22.7279	23.2802	22.2765	21.8067	22.5441	22.1719	19.8417	23.2804	K	2	___1	1	0.000138786			0.0155243	0.978117	0.0202427	0.0374109	0.999277
P02511;E9PR44;A0A024R3B9;E9PNH7;E9PJL7;E9PRA8	P02511	Alpha-crystallin B chain	CRYAB	FSVNLDVKHFSPEELKVKVLGDVIEVHGKHE	90	26.5375	23.4017	23.7069	24.3848	25.7034	24.2537	23.8873	26.6769	21.2106	24.7962	24.7061	24.0411	25.157	25.1496	K	2	___1	1	1.06e-16			0.0128115	0.981231	-0.0196857	-0.0318416	0.999419
H7C579;Q9NQR4;F8WF70	H7C579	Omega-amidase NIT2	NIT2	YFPEYAEKIPGESTQKLSEVAKECSIYLIGG	162	27.1129	26.8781	27.1831	25.3633	27.5314	27.5473	27.898	28.0359	25.1341	28.6803	27.0022	26.2562	26.249	28.0182	K	2	___1	1	9.36e-56			0.0123771	0.981559	-0.019743	-0.0309581	0.999437
P20700;E9PBF6;A0A0D9SFE5;A0A0D9SFY5;Q03252	P20700;Q03252	Lamin-B1;Lamin-B2	LMNB1;LMNB2	PATPLSPTRLSRLQEKEELRELNDRLAHYID;PTTPLSPTRLSRLQEKEELRELNDRLAVYID	47	19.5603	19.4305	21.6463	22.488	19.9071	22.6985	22.2337	22.4366	19.1435	19.7513	22.7932	20.8378	22.5571	20.5687	K	2	___1	1	0.00384029			0.00972392	0.986602	0.0176855	0.0248629	0.999604
P40926;P40926-2;G3XAL0	P40926	Malate dehydrogenase. mitochondrial;Malate dehydrogenase	MDH2	KMISDAIPELKASIKKGEDFVKTLK______	329	20.0035	26.5358	27.1962	25.8888	21.1338	28.376	27.6372	20.5644	18.9412	28.0416	24.4757	27.2683	28.5857	28.7022	K	2	___2	1	1.9e-06			0.00597059	0.991309	-0.0274574	-0.01675	0.999623
E9PR30;P62861	E9PR30	40S ribosomal protein S30	FAU	MQYNRRFVNVVPTFGKKKGPNANS_______	90	22.1246	19.9715	24.328	26.0135	24.9109	24.2331	24.7742	23.3163	20.384	24.5408	25.426	22.2495	25.1818	25.1675	K	2	___1	1	0.000313479			0.00878589	0.988427	-0.0128427	-0.0217377	0.99974
P38117;P38117-2;M0QY67	P38117	Electron transfer flavoprotein subunit beta	ETFB	LPNIMKAKKKKIEVIKPGDLGVDLTSKLSVI	210	20.1868	21.0253	18.9029	21.5275	22.5511	23.9276	20.2921	20.8398	19.9504	18.6166	19.7523	24.9206	20.588	23.8616	K	2	___1	1	4.56e-05			0.0061368	0.990711	0.0165713	0.0165055	0.999766
P11217;P11217-2	P11217	Glycogen phosphorylase. muscle form	PYGM	LHVITLYNRIKREPNKFFVPRTVMIGGKAAP	597	28.7036	23.5378	27.765	28.4612	28.4553	28.5662	27.9697	29.3669	24.7919	28.6459	28.7521	24.5138	28.2182	29.2588	K	2	___1	1	0.00220676			0.00612517	0.990385	0.012686	0.0159906	0.999821
A0A087WT47;P19237;G3V4F8;G3V3L5	A0A087WT47	Troponin I. slow skeletal muscle	TNNI1	VQRKPKITASRKLLLKSLMLAKAKECWEQEH	19	24.4799	27.2695	27.4045	27.9574	27.3927	27.6616	25.8543	24.9103	25.9398	27.0341	27.3564	28.0278	27.416	27.3974	K	2	___1	1	4.28e-05			0.0083573	0.989718	0.00884274	0.0194303	0.99983
Q5QNZ2;P24539	Q5QNZ2	ATP synthase F(0) complex subunit B1. mitochondrial	ATP5F1	YGPFVADFADKLNEQKLAQLEEAKQASIQHI	70	20.0989	20.6812	18.6096	21.2563	22.7844	23.0389	22.6718	22.7914	21.9901	19.145	20.1332	19.239	22.1293	23.6229	K	2	___1	1	5.09e-44			0.00560915	0.990669	-0.0128858	-0.0148351	0.999834
P48735;P48735-2	P48735	Isocitrate dehydrogenase [NADP]. mitochondrial	IDH2	TKPITIGRHAHGDQYKATDFVADRAGTFKMV	180	29.4759	22.4899	24.2078	24.9973	25.9824	24.7213	23.4986	27.0163	23.8474	26.2888	24.9946	23.815	24.0538	25.2827	K	3	___1	1	1.39e-110			0.00509463	0.990997	-0.0106572	-0.0133304	0.999875
A0A0A0MTS7;Q8WZ42-12;Q8WZ42-13;Q8WZ42-11;Q8WZ42-4;Q8WZ42-7;Q8WZ42-2;Q8WZ42;Q8WZ42-8;Q8WZ42-5	A0A0A0MTS7	Titin	TTN	EPATFVEKLEPSQLLKKGDATQLACKVTGTP	5556	19.6429	21.536	21.6006	22.2874	20.1786	22.9232	20.7268	21.5265	18.4294	21.0004	21.6072	21.3434	22.6202	22.4048	K	2	___1	1	0.00652228			0.00262776	0.996086	0.00519998	0.00684359	0.999969
Q14315-2;Q14315	Q14315-2	Filamin-C	FLNC	DNKDGTITVRYAPTEKGLHQMGIKYDGNHIP	1798	25.5126	23.0226	23.4248	25.1472	24.7755	25.4137	24.3317	25.7891	23.518	24.5397	25.3575	22.1663	24.7684	25.5008	K	3	___1	1	3.73e-05			0.00112894	0.998691	0.00167138	0.00281942	0.999996
S4R371;P05413;S4R3A2	S4R371	Fatty acid-binding protein. heart	FABP3	EKNGDILTLKTHSTFKNTEISFKLGVEFDET	59	24.4698	21.5827	22.2845	23.847	24.4459	24.1311	23.1524	25.7579	18.481	24.9976	24.2248	21.7569	23.7112	24.9978	K	3	___1	1	8.53e-08			0.000781627	0.998315	0.00197193	0.00209904	0.999996
