# Supplementary material for: High-intensity interval training remodels the proteome and acetylome of human skeletal muscle
Source: eLife. 2022 May 31;11:e69802. doi: 10.7554/eLife.69802 (PMC9154743; doi:10.7554/eLife.69802)
Supplement: Supplementary file 6. [file elife-69802-supp6.xlsx]

## Sheet: Supp_File6_Acetyl Protein Int
Leading proteins	Protein names	Gene names	Summed Intensity	Rank
P62805	Histone H4	HIST1H4A	16303132701	1		Leading proteins	UniProtKB Accession Numbers of the Leading Protein
O75947	ATP synthase subunit d. mitochondrial	ATP5H	12063200000	2		Protein names	Protein name
P40939	Trifunctional enzyme subunit alpha. mitochondrial	HADHA	11800566910	3		Gene names	Gene name
P40926	Malate dehydrogenase. mitochondrial	MDH2	9448400000	4		Summed Intensity	Summed acetylation intensity from each acetyl-site per protein
P06732	Creatine kinase M-type	CKM	7277200000	5		Rank	Summed acetylation intensity rank within acetylated proteins
P00505	Aspartate aminotransferase. mitochondrial	GOT2	6949534598	6
P07954-2	Fumarate hydratase. mitochondrial	FH	6518604106	7
P42765	3-ketoacyl-CoA thiolase. mitochondrial	ACAA2	5880000000	8
P48047	ATP synthase subunit O. mitochondrial	ATP5O	4733693499	9
A0A0C4DFU2	Superoxide dismutase	SOD2	4523702499	10
P24752	Acetyl-CoA acetyltransferase. mitochondrial	ACAT1	4352379671	11
P69905	Hemoglobin subunit alpha	HBA1	4200000000	12
P48735	Isocitrate dehydrogenase [NADP]. mitochondrial	IDH2	3958800000	13
P60709	Actin. cytoplasmic 1	ACTB	3902253799	14
Q13423	NAD(P) transhydrogenase. mitochondrial	NNT	3826920102	15
F2Z337	Myoglobin	MB	3707948265	16
H0YL11	Isocitrate dehydrogenase [NADP]. mitochondrial	IDH2	3115017798	17
P04406	Glyceraldehyde-3-phosphate dehydrogenase	GAPDH	3074345905	18
P12883	Myosin-7	MYH7	3015121053	19
P13929	Beta-enolase	ENO3	2800000000	20
P07451	Carbonic anhydrase 3	CA3	2344742600	21
P08559	Pyruvate dehydrogenase E1 component subunit alpha. somatic form. mitochondrial	PDHA1	1766783001	22
P06576	ATP synthase subunit beta. mitochondrial	ATP5B	1737886352	23
P18859	ATP synthase-coupling factor 6. mitochondrial	ATP5J	1730000000	24
P02042	Hemoglobin subunit delta	HBD	1680000000	25
O43676	NADH dehydrogenase [ubiquinone] 1 beta subcomplex subunit 3	NDUFB3	1660000000	26
H0YK48	Tropomyosin alpha-1 chain	TPM1	1642349896	27
P06753	Tropomyosin alpha-3 chain	TPM3	1573503098	28
P09622	Dihydrolipoyl dehydrogenase. mitochondrial	DLD	1519889406	29
P04075	Fructose-bisphosphate aldolase A	ALDOA	1502800000	30
P07951	Tropomyosin beta chain	TPM2	1457500000	31
P05976	Myosin light chain 1/3. skeletal muscle isoform	MYL1	1228423200	32
P30049	ATP synthase subunit delta. mitochondrial	ATP5D	1188700000	33
P11217	Glycogen phosphorylase. muscle form	PYGM	1071575596	34
P25705	ATP synthase subunit alpha. mitochondrial	ATP5A1	1068100000	35
B0QYF7	Myoglobin	MB	1042764283	36
P12882	Myosin-1	MYH1	1022872197	37
P17540	Creatine kinase S-type. mitochondrial	CKMT2	953951999	38
P11055	Myosin-3	MYH3	9.03011e+08	39
P10606	Cytochrome c oxidase subunit 5B. mitochondrial	COX5B	889445598	40
Q5QNZ2	ATP synthase F(0) complex subunit B1. mitochondrial	ATP5F1	806204899	41
Q9UKX2	Myosin-2	MYH2	792169402	42
Q16698-2	2.4-dienoyl-CoA reductase. mitochondrial	DECR1	759963002	43
A0A0A0MSE2	Hydroxyacyl-coenzyme A dehydrogenase. mitochondrial	HADH	682109905	44
P42126-2	Enoyl-CoA delta isomerase 1. mitochondrial	ECI1	660800000	45
P10809	60 kDa heat shock protein. mitochondrial	HSPD1	615157997	46
P00558	Phosphoglycerate kinase 1	PGK1	539594546	47
A0A1C7CYY2	Coiled-coil domain-containing protein 7	CCDC7	530000000	48
P30038	Delta-1-pyrroline-5-carboxylate dehydrogenase. mitochondrial	ALDH4A1	513958100	49
K7EK07	Histone H3	H3F3B	507000000	50
A0A087WT47	Troponin I. slow skeletal muscle	TNNI1	503000000	51
O14561	Acyl carrier protein. mitochondrial	NDUFAB1	410000000	52
P30041	Peroxiredoxin-6	PRDX6	406716798	53
P60174-1	Triosephosphate isomerase	TPI1	402000000	54
J3KN67	Tropomyosin alpha-3 chain	TPM3	390467699	55
P09104-2	Gamma-enolase	ENO2	380000000	56
Q00872-10	Myosin-binding protein C. slow-type	MYBPC1	373000549	57
P31040-2	Succinate dehydrogenase [ubiquinone] flavoprotein subunit. mitochondrial	SDHA	3.63806e+08	58
P36957	Dihydrolipoyllysine-residue succinyltransferase component of 2-oxoglutarate dehydrogenase complex. mitochondrial	DLST	329336399	59
B4DJV2	Citrate synthase	CS	326076433	60
P50461	Cysteine and glycine-rich protein 3	CSRP3	305400000	61
P35609	Alpha-actinin-2	ACTN2	293846900	62
P53597	Succinyl-CoA ligase [ADP/GDP-forming] subunit alpha. mitochondrial	SUCLG1	275329602	63
P00568	Adenylate kinase isoenzyme 1	AK1	269161097	64
B7Z9I1	Medium-chain specific acyl-CoA dehydrogenase. mitochondrial	ACADM	267200000	65
Q96A32	Myosin regulatory light chain 2. skeletal muscle isoform	MYLPF	265702212	66
A0A087WXC5	NADH dehydrogenase [ubiquinone] 1 alpha subcomplex subunit 10. mitochondrial	NDUFA10	264000000	67
P06733	Alpha-enolase	ENO1	259680498	68
Q96DG6	Carboxymethylenebutenolidase homolog	CMBL	250900000	69
P13073	Cytochrome c oxidase subunit 4 isoform 1. mitochondrial	COX4I1	241000000	70
Q16795	NADH dehydrogenase [ubiquinone] 1 alpha subcomplex subunit 9. mitochondrial	NDUFA9	238000000	71
V9GYG0	ADP/ATP translocase 1	SLC25A4	232000000	72
P06748-2	Nucleophosmin	NPM1	227000000	73
O00330-3	Pyruvate dehydrogenase protein X component. mitochondrial	PDHX	225776001	74
A2A274	Aconitate hydratase. mitochondrial	ACO2	217570100	75
P14618	Pyruvate kinase PKM	PKM	213600000	76
Q13825	Methylglutaconyl-CoA hydratase. mitochondrial	AUH	213600000	77
C9J5D1	N-alpha-acetyltransferase 50	NAA50	180000000	78
A0A0A0MTS7	Titin	TTN	179121246	79
S4R3P5	Cob(I)yrinic acid a.c-diamide adenosyltransferase. mitochondrial	MMAB	178000000	80
P05141	ADP/ATP translocase 2	SLC25A5	163000000	81
P10412	Histone H1.4	HIST1H1E	162600000	82
P36542	ATP synthase subunit gamma. mitochondrial	ATP5C1	158868503	83
P30405	Peptidyl-prolyl cis-trans isomerase F. mitochondrial	PPIF	153200000	84
H7C579	Omega-amidase NIT2	NIT2	152000000	85
H0YDD4	Acetyltransferase component of pyruvate dehydrogenase complex	DLAT	140300000	86
Q6NVY1	3-hydroxyisobutyryl-CoA hydrolase. mitochondrial	HIBCH	137800000	87
P31937	3-hydroxyisobutyrate dehydrogenase. mitochondrial	HIBADH	133986795	88
Q14315-2	Filamin-C	FLNC	132167283	89
O60662	Kelch-like protein 41	KLHL41	130834901	90
P11142	Heat shock cognate 71 kDa protein	HSPA8	128348241	91
A0A286YFB1	Troponin T. fast skeletal muscle	TNNT3	127969201	92
P13805-2	Troponin T. slow skeletal muscle	TNNT1	126283101	93
Q6YN16	Hydroxysteroid dehydrogenase-like protein 2	HSDL2	123562672	94
Q06830	Peroxiredoxin-1	PRDX1	122411898	95
P30048-2	Thioredoxin-dependent peroxide reductase. mitochondrial	PRDX3	118000000	96
C9J8Q5	Succinate-semialdehyde dehydrogenase. mitochondrial	ALDH5A1	117276096	97
P10916	Myosin regulatory light chain 2. ventricular/cardiac muscle isoform	MYL2	116441898	98
P00915	Carbonic anhydrase 1	CA1	113100000	99
P43155-2	Carnitine O-acetyltransferase	CRAT	106121202	100
Q99497	Protein deglycase DJ-1	PARK7	102666200	101
Q02252-2	Methylmalonate-semialdehyde dehydrogenase [acylating]. mitochondrial	ALDH6A1	98700000	102
J3QS39	Ubiquitin-60S ribosomal protein L40	UBB	98400000	103
P08237	ATP-dependent 6-phosphofructokinase. muscle type	PFKM	95600000	104
G3V0I5	NADH dehydrogenase [ubiquinone] flavoprotein 1. mitochondrial	NDUFV1	94500000	105
P61604	10 kDa heat shock protein. mitochondrial	HSPE1	90801201	106
P78417	Glutathione S-transferase omega-1	GSTO1	89000000	107
P31415	Calsequestrin-1	CASQ1	85800000	108
P55084	Trifunctional enzyme subunit beta. mitochondrial	HADHB	83135196	109
P49411	Elongation factor Tu. mitochondrial	TUFM	81293700	110
Q96HC4-3	PDZ and LIM domain protein 5	PDLIM5	80300000	111
S4R371	Fatty acid-binding protein. heart	FABP3	79300000	112
P02511	Alpha-crystallin B chain	CRYAB	77000000	113
Q14118	Dystroglycan	DAG1	75800000	114
P62937	Peptidyl-prolyl cis-trans isomerase A	PPIA	73800000	115
P49189	4-trimethylaminobutyraldehyde dehydrogenase	ALDH9A1	72700000	116
Q9P2R7-2	Succinyl-CoA ligase [ADP-forming] subunit beta. mitochondrial	SUCLA2	72076805	117
P09493	Tropomyosin alpha-1 chain	TPM1	71600000	118
P40925	Malate dehydrogenase. cytoplasmic	MDH1	71104798	119
P32119	Peroxiredoxin-2	PRDX2	70000000	120
E9PN17	ATP synthase subunit g. mitochondrial	ATP5L	68542798	121
M0QZ10	Branched-chain-amino-acid aminotransferase	BCAT2	68200000	122
P08590	Myosin light chain 3	MYL3	66500000	123
A0A087WXS0	Troponin I. fast skeletal muscle	TNNI2	65682897	124
P53004	Biliverdin reductase A	BLVRA	65500000	125
Q9UIJ7	GTP:AMP phosphotransferase AK3. mitochondrial	AK3	65039201	126
P02545	Prelamin-A/C	LMNA	64157296	127
Q8NE86-3	Calcium uniporter protein. mitochondrial	MCU	63310299	128
P16219	Short-chain specific acyl-CoA dehydrogenase. mitochondrial	ACADS	62205201	129
A0A0A0MS07	Ig gamma-1 chain C region	IGHG1	58100000	130
P03928	ATP synthase protein 8	MT-ATP8	58100000	131
Q12931-2	Heat shock protein 75 kDa. mitochondrial	TRAP1	56100000	132
O75208	Ubiquinone biosynthesis protein COQ9. mitochondrial	COQ9	54100000	133
Q53GG5	PDZ and LIM domain protein 3	PDLIM3	50329701	134
P28331	NADH-ubiquinone oxidoreductase 75 kDa subunit. mitochondrial	NDUFS1	50100000	135
Q562R1	Beta-actin-like protein 2	ACTBL2	50000000	136
G3V1N2	Hemoglobin subunit alpha	HBA2	49500000	137
G3V267	Maleylacetoacetate isomerase	GSTZ1	48451704	138
Q8IVN3	Musculoskeletal embryonic nuclear protein 1	MUSTN1	47800000	139
P14854	Cytochrome c oxidase subunit 6B1	COX6B1	47000000	140
Q13642-5	Four and a half LIM domains protein 1	FHL1	44854530	141
H3BLU7	Aflatoxin B1 aldehyde reductase member 2	AKR7A2	43600000	142
P02647	Apolipoprotein A-I	APOA1	43410802	143
A0A0G2JIW1	Heat shock 70 kDa protein 1B	HSPA1B	43098842	144
O43678	NADH dehydrogenase [ubiquinone] 1 alpha subcomplex subunit 2	NDUFA2	42700000	145
A0A087X1N7	Nebulin	NEB	42308743	146
P30044-2	Peroxiredoxin-5. mitochondrial	PRDX5	41600000	147
P54296	Myomesin-2	MYOM2	41141400	148
E9PF16	Acyl-CoA synthetase family member 2. mitochondrial	ACSF2	41000000	149
O14983-2	Sarcoplasmic/endoplasmic reticulum calcium ATPase 1	ATP2A1	40299496	150
C9JZN9	Troponin T. fast skeletal muscle	TNNT3	40000000	151
P21912	Succinate dehydrogenase [ubiquinone] iron-sulfur subunit. mitochondrial	SDHB	39500000	152
Q9NPJ3	Acyl-coenzyme A thioesterase 13	ACOT13	39000000	153
Q9UFN0	Protein NipSnap homolog 3A	NIPSNAP3A	38800000	154
P35270	Sepiapterin reductase	SPR	37800000	155
O60814	Histone H2B type 1-K	HIST1H2BK	36365096	156
Q96HY7	Probable 2-oxoglutarate dehydrogenase E1 component DHKTD1. mitochondrial	DHTKD1	36300000	157
A0A0C4DGA2	Enoyl-CoA delta isomerase 2. mitochondrial	ECI2	36249196	158
P15259	Phosphoglycerate mutase 2	PGAM2	36040102	159
Q6IC98	GRAM domain-containing protein 4	GRAMD4	35600000	160
H0Y5L2	Ethylmalonyl-CoA decarboxylase	ECHDC1	35500000	161
P17661	Desmin	DES	34358901	162
K7EQW8	Tropomyosin alpha-3 chain	TPM4	34159899	163
Q16775-2	Hydroxyacylglutathione hydrolase. mitochondrial	HAGH	33800000	164
P00441	Superoxide dismutase [Cu-Zn]	SOD1	33600000	165
P36871	Phosphoglucomutase-1	PGM1	32980451	166
Q04760-2	Lactoylglutathione lyase	GLO1	31200000	167
P50213-2	Isocitrate dehydrogenase [NAD] subunit alpha. mitochondrial	IDH3A	31083287	168
A0A087X0W7	Acyl-coenzyme A thioesterase 1	ACOT2	30500000	169
P04792	Heat shock protein beta-1	HSPB1	30151399	170
E7ETT4	Propionyl-CoA carboxylase beta chain. mitochondrial	PCCB	30000000	171
Q8N0X4-2	Citrate lyase subunit beta-like protein. mitochondrial	CLYBL	29400000	172
P49748	Very long-chain specific acyl-CoA dehydrogenase. mitochondrial	ACADVL	28918700	173
Q9NZJ6	Ubiquinone biosynthesis O-methyltransferase. mitochondrial	COQ3	28403496	174
P00338	L-lactate dehydrogenase A chain	LDHA	27928827	175
Q8N335	Glycerol-3-phosphate dehydrogenase 1-like protein	GPD1L	27700000	176
Q14324	Myosin-binding protein C. fast-type	MYBPC2	27254899	177
A0A1B0GTB8	Carnitine O-palmitoyltransferase 2. mitochondrial	CPT2	26900000	178
Q86UP2-2	Kinectin	KTN1	26900000	179
P12277	Creatine kinase B-type	CKB	26500000	180
Q9Y305-3	Acyl-coenzyme A thioesterase 9. mitochondrial	ACOT9	26200000	181
E9PH64	NADH dehydrogenase [ubiquinone] 1 beta subcomplex subunit 9	NDUFB9	26100000	182
Q9UJZ1-2	Stomatin-like protein 2. mitochondrial	STOML2	26000000	183
V9GYG9	Apolipoprotein A-II	APOA2	25800000	184
Q08257-3	Quinone oxidoreductase	CRYZ	25438847	185
Q9NSE4	Isoleucine--tRNA ligase. mitochondrial	IARS2	25300000	186
P60903	Protein S100-A10	S100A10	25093200	187
P02144	Myoglobin	MB	24800000	188
P21796	Voltage-dependent anion-selective channel protein 1	VDAC1	24257305	189
P68104	Elongation factor 1-alpha 1	EEF1A1	23934198	190
Q9Y623	Myosin-4	MYH4	22900000	191
P07195	L-lactate dehydrogenase B chain	LDHB	22562494	192
Q9NP98	Myozenin-1	MYOZ1	21900874	193
J3QS51	Inositol-3-phosphate synthase 1	ISYNA1	21800000	194
A0A024R6I7	Alpha-1-antitrypsin	SERPINA1	21786000	195
O95139	NADH dehydrogenase [ubiquinone] 1 beta subcomplex subunit 6	NDUFB6	21676700	196
P04040	Catalase	CAT	21300000	197
Q9NVH6-4	Trimethyllysine dioxygenase. mitochondrial	TMLHE	21294201	198
E9PR30	40S ribosomal protein S30	FAU	21100000	199
Q5R3B4	Mitochondrial pyruvate carrier 2	MPC2	20900000	200
P14621	Acylphosphatase-2	ACYP2	20776610	201
Q9BRA2	Thioredoxin domain-containing protein 17	TXNDC17	20300000	202
P07585	Decorin	DCN	20220203	203
P51884	Lumican	LUM	20060200	204
P38646	Stress-70 protein. mitochondrial	HSPA9	19948904	205
Q9NR19	Acetyl-coenzyme A synthetase. cytoplasmic	ACSS2	19900000	206
Q12797-4	Aspartyl/asparaginyl beta-hydroxylase	ASPH	19600000	207
F2Z3L7	Protein NipSnap homolog 3B	NIPSNAP3B	19400000	208
P13804	Electron transfer flavoprotein subunit alpha. mitochondrial	ETFA	19400000	209
P08670	Vimentin	VIM	18818899	210
Q5JRX3	Presequence protease. mitochondrial	PITRM1	18594601	211
P08758	Annexin A5	ANXA5	18329600	212
E9PLK3	Puromycin-sensitive aminopeptidase	NPEPPS	18305108	213
P81605	Dermcidin	DCD	18300000	214
E7EPT4	NADH dehydrogenase [ubiquinone] flavoprotein 2. mitochondrial	NDUFV2	18208095	215
E9PNP3	Mth938 domain-containing protein	AAMDC	18055500	216
A0A0A0MT83	Isovaleryl-CoA dehydrogenase. mitochondrial	IVD	17900000	217
P00367	Glutamate dehydrogenase 1. mitochondrial	GLUD1	17700000	218
P16403	Histone H1.2	HIST1H1C	17100000	219
Q04446	1.4-alpha-glucan-branching enzyme	GBE1	16797208	220
Q02218	2-oxoglutarate dehydrogenase. mitochondrial	OGDH	16609900	221
Q9UMS6-5	Synaptopodin-2	SYNPO2	16438800	222
O00499-6	Myc box-dependent-interacting protein 1	BIN1	16334801	223
P09382	Galectin-1	LGALS1	15800000	224
C9JVN9	L-2-hydroxyglutarate dehydrogenase. mitochondrial	L2HGDH	15700000	225
Q9UHQ9	NADH-cytochrome b5 reductase 1	CYB5R1	15558003	226
P08133	Annexin A6	ANXA6	15151801	227
P17174	Aspartate aminotransferase. cytoplasmic	GOT1	15000000	228
H7BY37	Histone-lysine N-methyltransferase 2C	KMT2C	14785000	229
P61981	14-3-3 protein gamma	YWHAG	14333603	230
P04080	Cystatin-B	CSTB	13600000	231
Q9NRG7-2	Epimerase family protein SDR39U1	SDR39U1	13500000	232
P30084	Enoyl-CoA hydratase. mitochondrial	ECHS1	13200000	233
A0A1B0GW44	Cathepsin D	CTSD	13100000	234
E9PPJ3	Smoothelin-like protein 1	SMTNL1	13100000	235
P13639	Elongation factor 2	EEF2	12770200	236
A0A087WYT3	Prostaglandin E synthase 3	PTGES3	12600000	237
I3L1F7	Tektin-5	TEKT5	12600000	238
P23297	Protein S100-A1	S100A1	12600000	239
Q86WA6-2	Valacyclovir hydrolase	BPHL	12300000	240
Q9UBY9	Heat shock protein beta-7	HSPB7	12300000	241
P16615-2	Sarcoplasmic/endoplasmic reticulum calcium ATPase 2	ATP2A2	12267300	242
A0A0B4J2D5	ES1 protein homolog. mitochondrial	C21orf33	12000000	243
Q09666	Neuroblast differentiation-associated protein AHNAK	AHNAK	11835905	244
P23528	Cofilin-1	CFL1	11800000	245
Q6NZI2	Polymerase I and transcript release factor	PTRF	11562495	246
P52179	Myomesin-1	MYOM1	11318891	247
P22695	Cytochrome b-c1 complex subunit 2. mitochondrial	UQCRC2	11248297	248
Q15424-2	Scaffold attachment factor B1	SAFB	11200000	249
P05091	Aldehyde dehydrogenase. mitochondrial	ALDH2	11000000	250
P11277-2	Spectrin beta chain. erythrocytic	SPTB	10961201	251
J3KS22	L-xylulose reductase	DCXR	10800000	252
O14958	Calsequestrin-2	CASQ2	10700000	253
A0A087WUQ6	Glutathione peroxidase	GPX1	10600000	254
Q9NPC6	Myozenin-2	MYOZ2	10500000	255
Q8IVE0	Putative ciliary rootlet coiled-coil protein-like 2 protein	CROCCP3	10200000	256
P62807	Histone H2B type 1-C/E/F/G/I	HIST1H2BC	9993904	257
O75531	Barrier-to-autointegration factor	BANF1	9916895	258
A0A0U1RQF0	Fatty acid synthase	FASN	9843706	259
Q03252	Lamin-B2	LMNB2	9840504	260
C9JRZ6	MICOS complex subunit MIC19	CHCHD3	9703100	261
A0A0C4DFM5	Myotilin	MYOT	9631503	262
Q08043	Alpha-actinin-3	ACTN3	9449601	263
P23109-2	AMP deaminase 1	AMPD1	9405700	264
C9JEU5	Fibrinogen gamma chain	FGG	9214894	265
P56381	ATP synthase subunit epsilon. mitochondrial	ATP5E	8999999	266
O75746	Calcium-binding mitochondrial carrier protein Aralar1	SLC25A12	8996897	267
P35232	Prohibitin	PHB	8939700	268
P61970	Nuclear transport factor 2	NUTF2	8798201	269
P35573	Glycogen debranching enzyme	AGL	8549398	270
P37837	Transaldolase	TALDO1	8532699	271
O75323	Protein NipSnap homolog 2	GBAS	8494804	272
P10768	S-formylglutathione hydrolase	ESD	8283197	273
P26641	Elongation factor 1-gamma	EEF1G	8119101	274
Q96I99	Succinyl-CoA ligase [GDP-forming] subunit beta. mitochondrial	SUCLG2	7943098	275
M0QWZ7	Serine--tRNA ligase. mitochondrial	SARS2	7870302	276
P40227	T-complex protein 1 subunit zeta	CCT6A	7780204	277
Q00325-2	Phosphate carrier protein. mitochondrial	SLC25A3	7719000	278
P07305-2	Histone H1.0	H1F0	7600875	279
P35914-3	Hydroxymethylglutaryl-CoA lyase. mitochondrial	HMGCL	7551199	280
Q5BKX8	Muscle-related coiled-coil protein	MURC	7480897	281
Q96HC4-2	PDZ and LIM domain protein 5	PDLIM5	7267097	282
P14927	Cytochrome b-c1 complex subunit 7	UQCRB	7202296	283
P12270	Nucleoprotein TPR	TPR	7034096	284
P06744	Glucose-6-phosphate isomerase	GPI	6912003	285
E5RIP7	Inositol monophosphatase 1	IMPA1	6896596	286
P01024	Complement C3	C3	6845200	287
Q16762	Thiosulfate sulfurtransferase	TST	6833201	288
F8W1R7	Myosin light polypeptide 6	MYL6	6613701	289
P20962	Parathymosin	PTMS	6586598	290
P02794	Ferritin heavy chain	FTH1	6557104	291
Q8N142	Adenylosuccinate synthetase isozyme 1	ADSSL1	6286702	292
P00918	Carbonic anhydrase 2	CA2	6199198	293
P68366-2	Tubulin alpha-4A chain	TUBA4A	6194397	294
B8ZZX2	Coenzyme Q-binding protein COQ10 homolog B. mitochondrial	COQ10B	6157101	295
P20774	Mimecan	OGN	5809798	296
O43252	Bifunctional 3'-phosphoadenosine 5'-phosphosulfate synthase 1	PAPSS1	5788400	297
O95182	NADH dehydrogenase [ubiquinone] 1 alpha subcomplex subunit 7	NDUFA7	5770299	298
P19367-4	Hexokinase-1	HK1	5754202	299
P53778-2	Mitogen-activated protein kinase 12	MAPK12	5644399	300
C9JFR7	Cytochrome c	CYCS	5634997	301
A0A1B0GWJ0	Adenylosuccinate lyase	ADSL	5559504	302
P63104	14-3-3 protein zeta/delta	YWHAZ	5494799	303
I3L141	Zinc finger ZZ-type and EF-hand domain-containing protein 1	ZZEF1	5396898	304
P24298	Alanine aminotransferase 1	GPT	5287898	305
Q9UBQ7	Glyoxylate reductase/hydroxypyruvate reductase	GRHPR	5237601	306
H7C5V1	THUMP domain-containing protein 2	THUMPD2	5229499	307
E5RGS7	PDZ and LIM domain protein 2	PDLIM2	5175999	308
E7EQR4	Ezrin	EZR	5152301	309
Q8NCU8-2	Uncharacterized protein encoded by LINC00116	LINC00116	5121401	310
Q9NXA8-4	NAD-dependent protein deacylase sirtuin-5. mitochondrial	SIRT5	5006699	311
O75380	NADH dehydrogenase [ubiquinone] iron-sulfur protein 6. mitochondrial	NDUFS6	4901800	312
P51608	Methyl-CpG-binding protein 2	MECP2	4875500	313
Q60FE5	Filamin-A	FLNA	4776003	314
Q9Y4W6	AFG3-like protein 2	AFG3L2	4677600	315
Q00688	Peptidyl-prolyl cis-trans isomerase FKBP3	FKBP3	4531601	316
Q9H900	Protein zwilch homolog	ZWILCH	4423701	317
P17612-2	cAMP-dependent protein kinase catalytic subunit alpha	PRKACA	4399403	318
P55809	Succinyl-CoA:3-ketoacid coenzyme A transferase 1. mitochondrial	OXCT1	4397508	319
Q9P0L0	Vesicle-associated membrane protein-associated protein A	VAPA	4326598	320
P47756	F-actin-capping protein subunit beta	CAPZB	4270502	321
P07355	Annexin A2	ANXA2	4057501	322
A0A087WT48	DnaJ homolog subfamily A member 2	DNAJA2	4049302	323
Q00765	Receptor expression-enhancing protein 5	REEP5	4028999	324
E9PRS8	Cysteine--tRNA ligase. cytoplasmic	CARS	4012600	325
P62942	Peptidyl-prolyl cis-trans isomerase FKBP1A	FKBP1A	3965300	326
P50502	Hsc70-interacting protein	ST13	3918999	327
A0A087WYP2	Selenoprotein H	C11orf31	3847002	328
A0A0A0MSQ0	Plastin-3	PLS3	3815300	329
Q6GMV3	Putative peptidyl-tRNA hydrolase PTRHD1	PTRHD1	3760798	330
P18206-2	Vinculin	VCL	3657401	331
P22033	Methylmalonyl-CoA mutase. mitochondrial	MUT	3635601	332
P12956	X-ray repair cross-complementing protein 6	XRCC6	3597299	333
P67936	Tropomyosin alpha-4 chain	TPM4	3577199	334
P31930	Cytochrome b-c1 complex subunit 1. mitochondrial	UQCRC1	3570802	335
Q9Y277	Voltage-dependent anion-selective channel protein 3	VDAC3	3528799	336
A0A0J9YXN7	Perilipin-4	PLIN4	3523000	337
P49773	Histidine triad nucleotide-binding protein 1	HINT1	3516699	338
X6R941	Nuclear cap-binding protein subunit 1	NCBP1	3365502	339
P20700	Lamin-B1	LMNB1	3282302	340
H0YHM6	Alpha-aminoadipic semialdehyde dehydrogenase	ALDH7A1	3271800	341
Q6ZMU5	Tripartite motif-containing protein 72	TRIM72	3237999	342
P01008	Antithrombin-III	SERPINC1	3237198	343
P02787	Serotransferrin	TF	3231101	344
P31948	Stress-induced-phosphoprotein 1	STIP1	3188901	345
G5E9X5	Methylcrotonoyl-CoA carboxylase subunit alpha. mitochondrial	MCCC1	3078001	346
A0A0D9SGD3	Putative deoxyribonuclease TATDN1	TATDN1	3033999	347
P54652	Heat shock-related 70 kDa protein 2	HSPA2	2867001	348
Q8TCS8	Polyribonucleotide nucleotidyltransferase 1. mitochondrial	PNPT1	2860201	349
O43920	NADH dehydrogenase [ubiquinone] iron-sulfur protein 5	NDUFS5	2859400	350
Q13228	Selenium-binding protein 1	SELENBP1	2855399	351
P07900	Heat shock protein HSP 90-alpha	HSP90AA1	2835102	352
P55072	Transitional endoplasmic reticulum ATPase	VCP	2814900	353
C9J406	MICOS complex subunit MIC60	IMMT	2788402	354
P54725-2	UV excision repair protein RAD23 homolog A	RAD23A	2657747	355
P16233	Pancreatic triacylglycerol lipase	PNLIP	2655699	356
K7EKP1	Apolipoprotein C-I	APOC1	2634201	357
A0A0U1RRL8	Spermatogenesis-associated protein 20	SPATA20	2519400	358
C9K0U8	Single-stranded DNA-binding protein. mitochondrial	SSBP1	2469599	359
P68402	Platelet-activating factor acetylhydrolase IB subunit beta	PAFAH1B2	2444299	360
C9J8T6	Cytochrome c oxidase copper chaperone	COX17	2393561	361
Q15847	Adipogenesis regulatory factor	ADIRF	2347400	362
O95810	Serum deprivation-response protein	SDPR	2281657	363
P61081	NEDD8-conjugating enzyme Ubc12	UBE2M	2271301	364
P17096	High mobility group protein HMG-I/HMG-Y	HMGA1	2218299	365
Q96DC8	Enoyl-CoA hydratase domain-containing protein 3. mitochondrial	ECHDC3	2213500	366
Q13061	Triadin	TRDN	2208201	367
O00483	Cytochrome c oxidase subunit NDUFA4	NDUFA4	2185301	368
Q15233-2	Non-POU domain-containing octamer-binding protein	NONO	2140899	369
Q92947	Glutaryl-CoA dehydrogenase. mitochondrial	GCDH	2080599	370
P11532-4	Dystrophin	DMD	2065001	371
F8W914	Reticulon	RTN4	2030301	372
V9GZ45	Alpha-methylacyl-CoA racemase	AMACR	2024999	373
P04150-7	Glucocorticoid receptor	NR3C1	1953899	374
S4R3W9	39S ribosomal protein L19. mitochondrial	MRPL19	1892100	375
P28838-2	Cytosol aminopeptidase	LAP3	1849301	376
Q5TD07	Ribosyldihydronicotinamide dehydrogenase [quinone]	NQO2	1832299	377
P68363	Tubulin alpha-1B chain	TUBA1B	1823252	378
O14548	Cytochrome c oxidase subunit 7A-related protein. mitochondrial	COX7A2L	1644254	379
P00738	Haptoglobin	HP	1627401	380
P26038	Moesin	MSN	1561205	381
P61956-2	Small ubiquitin-related modifier 2	SUMO2	1557966	382
P21817-3	Ryanodine receptor 1	RYR1	1525799	383
Q9UII2	ATPase inhibitor. mitochondrial	ATPIF1	1518699	384
Q05639	Elongation factor 1-alpha 2	EEF1A2	1501039	385
Q15149-7	Plectin	PLEC	1449999	386
Q86TD4	Sarcalumenin	SRL	1222001	387
Q9NZB8-7	Molybdenum cofactor biosynthesis protein 1	MOCS1	1219382	388
P38117	Electron transfer flavoprotein subunit beta	ETFB	1193500	389
A0A087X2E5	Isocitrate dehydrogenase [NAD] subunit. mitochondrial	IDH3B	1131200	390
F6WQW2	Ran-specific GTPase-activating protein	RANBP1	1130393	391
A6NHL2-2	Tubulin alpha chain-like 3	TUBAL3	917200	392
H0Y8Z9	Acyl-CoA dehydrogenase family member 9. mitochondrial	ACAD9	850740	393
