# Supplementary material for: High-intensity interval training remodels the proteome and acetylome of human skeletal muscle
Source: eLife. 2022 May 31;11:e69802. doi: 10.7554/eLife.69802 (PMC9154743; doi:10.7554/eLife.69802)
Supplement: Supplementary file 7. [file elife-69802-supp7.xlsx]

## Sheet: Supp_File7_Acetyl_INT_1D_Enrich
Category column	Category value	Size	Enrichment Score	P value	Benj. Hoch. FDR
GOBP name	carboxylic acid metabolic process	67	0.346946	7.66767e-06	0.0104932		Category column	Annotation type
GOBP name	cellular ketone metabolic process	70	0.332065	1.31862e-05	0.00721815		Category value	Annotation term
GOBP name	monovalent inorganic cation transport	14	0.648888	3.7162e-05	0.0169521		Size	Number of proteins from the category in the acetylome
GOBP name	organic acid metabolic process	67	0.346946	7.66767e-06	0.0052466		Enrichment Score	1D enrichment score
GOBP name	oxoacid metabolic process	67	0.346946	7.66767e-06	0.00699547		P value	1D p-value
GOBP name	small molecule metabolic process	149	0.316674	1.37305e-07	0.000375804		Benj. Hoch. FDR	Benjamini-Hochberg FDR (<0.02) corrected p-value
GOCC name	mitochondrial matrix	60	0.338438	2.98822e-05	0.00620055
GOCC name	mitochondrial part	108	0.282619	1.51422e-05	0.006284
Keywords	Muscleprotein	24	0.470867	0.00011036	0.0118085
Keywords	Oxidoreductase	52	0.338371	8.43322e-05	0.0135353
Keywords	Transitpeptide	77	0.335361	5.00165e-06	0.00160553
