# Supplementary material for: High-intensity interval training remodels the proteome and acetylome of human skeletal muscle
Source: eLife. 2022 May 31;11:e69802. doi: 10.7554/eLife.69802 (PMC9154743; doi:10.7554/eLife.69802)
Supplement: Supplementary file 8. [file elife-69802-supp8.xlsx]

## Sheet: Supp_File8_ACI.txt
Leading proteins	Protein names	Gene names	Position	ACI_1	ACI_3	ACI_4	ACI_5	ACI_6	ACI_7	ACI_8	ACI_median	ACI_Rank
Q13423	NAD(P) transhydrogenase. mitochondrial	NNT	70	27401.8	19476.6	16193.7	11051.5	18231.7	24843.7	5671.52	18231.7	1		Leading proteins	UniProtKB Accession Numbers of the Leading Proteins
P40939	Trifunctional enzyme subunit alpha. mitochondrial;Long-chain enoyl-CoA hydratase;Long chain 3-hydroxyacyl-CoA dehydrogenase	HADHA	569	10151.4	11725.6	11457.6	9968.26	6457.69	19455.9	3459.06	10151.4	2		Protein names	Protein names
P07954-2	Fumarate hydratase. mitochondrial	FH	249	2103.5	6760.54	9966.1	5188.89	11146.9	14446.3	11530.1	9966.1	3		Gene names	Gene names
Q8NE86-3	Calcium uniporter protein. mitochondrial	MCU	283	7902.51	6779.84	12157.9	6245.71	13865.9	24499.3	9598.81	9598.81	4		Position	ac-K amino acid position
P05141;V9GYG0;P12236	ADP/ATP translocase 2;ADP/ATP translocase 2. N-terminally processed;ADP/ATP translocase 1;ADP/ATP translocase 3;ADP/ATP translocase 3. N-terminally processed;ADP/ATP translocase 4;ADP/ATP translocase 4. N-terminally processed	SLC25A5;SLC25A4;SLC25A6;SLC25A31	92	51524.2	1891.88	8904.24	8616.03	17027	11281.2	4074.27	8904.24	5		Value	Abundance corrected intensity - pre-HIIT
P62805	Histone H4;Histone H4-like protein type G	HIST1H4A;HIST1H4G	13	10392.7	314.703	9444.2	8305.96	8735.63	10192.3	8410.45	8735.63	6		ACI_median	Median ACI (pre-HIIT)
P62805	Histone H4;Histone H4-like protein type G	HIST1H4A;HIST1H4G	17	10392.7	314.703	9444.2	8305.96	8735.63	10192.3	8410.45	8735.63	7		ACI_Rank	Ranked median ACI within acetylome
O43676	NADH dehydrogenase [ubiquinone] 1 beta subcomplex subunit 3	NDUFB3	34	8424.32	9561.85	8258.39	9646.56	6328.31	26120.6	4098.94	8424.32	8
P42765	3-ketoacyl-CoA thiolase. mitochondrial	ACAA2	137	6466.36	6430.18	6293.93	7593.59	6363.78	12302	670.375	6430.18	9
S4R3P5	Cob(I)yrinic acid a.c-diamide adenosyltransferase. mitochondrial	MMAB	159	1912.14	2741.09	6221.6	12246.4	10378.7	11655.6	2417.59	6221.6	10
Q13825	Methylglutaconyl-CoA hydratase. mitochondrial	AUH	204	2324.01	5830.12	4583.34	5549.49	4941.13	8324.43	4819.5	4941.13	11
C9J5D1	N-alpha-acetyltransferase 50	NAA50	34	3030.7	3759.09	6501.38	7515.09	4616.6	4815.09	2144.22	4616.6	12
P30405	Peptidyl-prolyl cis-trans isomerase F. mitochondrial;Peptidyl-prolyl cis-trans isomerase	PPIF	67	454.567	501.774	1844.91	4804.33	8561.64	9406.3	4569.62	4569.62	13
P48047	ATP synthase subunit O. mitochondrial	ATP5O	162	1466.48	244.638	5383.47	5446.81	4044.84	10744.9	3728.63	4044.84	14
Q13825	Methylglutaconyl-CoA hydratase. mitochondrial	AUH	211	314.739	1103.77	11398.6	3936.94	5750.45	8457.62	2348.96	3936.94	15
Q13825	Methylglutaconyl-CoA hydratase. mitochondrial	AUH	204	314.739	1103.77	11398.6	3936.94	5750.45	8457.62	2348.96	3936.94	16
O75947	ATP synthase subunit d. mitochondrial	ATP5H	72	4316.88	405.242	1916.49	3804.3	295.751	7017.16	6366.7	3804.3	17
Q13825	Methylglutaconyl-CoA hydratase. mitochondrial	AUH	211	565.301	3446.6	1859.9	4140.33	4259.59	3676.07	1042.05	3446.6	18
Q96HY7	Probable 2-oxoglutarate dehydrogenase E1 component DHKTD1. mitochondrial	DHTKD1	800	2747.99	3344.15	1707.07	9631.5	7243.69	9856.56	1231.56	3344.15	19
P48047	ATP synthase subunit O. mitochondrial	ATP5O	60	3082.52	62.7725	1000.15	1213.15	3378.36	3470.4	2575.6	2575.6	20
M0QZ10	Branched-chain-amino-acid aminotransferase;Branched-chain-amino-acid aminotransferase. mitochondrial	BCAT2	321	1339.81	1026.24	3731.65	1477.89	6103.16	7002.76	2417.96	2417.96	21
P08559	Pyruvate dehydrogenase E1 component subunit alpha. somatic form. mitochondrial	PDHA1	321	754.541	1871.2	3298.18	3711.49	3404.04	2408.36	1263.19	2408.36	22
Q9UFN0	Protein NipSnap homolog 3A	NIPSNAP3A	48	1696.39	276.492	2691.69	2346.39	3484.99	2928.93	1195.09	2346.39	23
Q5QNZ2	ATP synthase F(0) complex subunit B1. mitochondrial	ATP5F1	101	2438.61	3292.73	2316.82	1550.69	1401.43	3806.27	404.411	2316.82	24
Q8N0X4-2	Citrate lyase subunit beta-like protein. mitochondrial	CLYBL	57	22.9372	30.3687	5558.35	2525.08	1521.86	88302.7	2266.47	2266.47	25
Q86UP2-2	Kinectin	KTN1	450	2127.38	44.1484	2841.31	1056.21	147.751	12491.7	3219.67	2127.38	26
P06748-2	Nucleophosmin	NPM1	238	2055.58	104.496	993.843	2750.68	2532.72	2376.15	2024.49	2055.58	27
P48047	ATP synthase subunit O. mitochondrial	ATP5O	172	331.964	126.352	2403.42	1525.11	3079.6	5539.29	2021.55	2021.55	28
H0Y5L2	Ethylmalonyl-CoA decarboxylase	ECHDC1	225	2662.5	80.4556	908.797	1672.34	1976.75	3591.18	1987.4	1976.75	29
Q13825	Methylglutaconyl-CoA hydratase. mitochondrial	AUH	160	337.078	786.429	1859.9	1932.15	3279.89	2657.16	1150.6	1859.9	30
P18859	ATP synthase-coupling factor 6. mitochondrial	ATP5J	41	118.89	511.149	1936.14	1799.91	1975.39	2875.17	1095.21	1799.91	31
J3QS51	Inositol-3-phosphate synthase 1	ISYNA1	62	3.86223	1918.01	1311.71	2056.03	4012.98	1739.92	73.7503	1739.92	32
P24752	Acetyl-CoA acetyltransferase. mitochondrial	ACAT1	174	284.173	159.049	1844.67	1641.15	350.378	4564.12	1699.18	1641.15	33
P53004	Biliverdin reductase A	BLVRA	269	1613.66	121.548	956.315	3157.49	5168.74	2199.21	828.468	1613.66	34
E7ETT4	Propionyl-CoA carboxylase beta chain. mitochondrial	PCCB	101	30.2172	26.7227	1610.95	1520.92	2458.09	3874.31	1717.82	1610.95	35
Q9Y305-3	Acyl-coenzyme A thioesterase 9. mitochondrial	ACOT9	43	2781.6	41.0417	543.644	1446.01	1869.3	2794.78	1007.06	1446.01	36
Q12931-2	Heat shock protein 75 kDa. mitochondrial	TRAP1	371	6.48187	20.4086	1995.07	484.633	1729.21	3546.52	1399.45	1399.45	37
E9PF16	Acyl-CoA synthetase family member 2. mitochondrial	ACSF2	253	1251.64	971.329	2004.24	1191.23	1664.88	4002.19	1336.07	1336.07	38
Q9NVH6-4	Trimethyllysine dioxygenase. mitochondrial	TMLHE	294	1315.06	53.9053	3387.97	1053.63	35.8938	4473.58	2032.11	1315.06	39
P09622	Dihydrolipoyl dehydrogenase. mitochondrial;Dihydrolipoyl dehydrogenase	DLD	420	1305.2	1337.02	1118.52	675.8	1715.84	1962	856.313	1305.2	40
Q16795	NADH dehydrogenase [ubiquinone] 1 alpha subcomplex subunit 9. mitochondrial	NDUFA9	189	1336.95	3.99339	978.522	1298.18	1264.59	2729.13	1479.03	1298.18	41
P07954-2	Fumarate hydratase. mitochondrial	FH	37	1256.97	588.62	1406.98	979.359	2004.25	3520.36	1144.97	1256.97	42
Q9NR19	Acetyl-coenzyme A synthetase. cytoplasmic	ACSS2	418	1916.28	284.001	1743.98	2685.11	1130.7	1252.39	1011.42	1252.39	43
P40939	Trifunctional enzyme subunit alpha. mitochondrial;Long-chain enoyl-CoA hydratase;Long chain 3-hydroxyacyl-CoA dehydrogenase	HADHA	406	1576.36	37.5221	2391.27	1185.04	1124.12	4069	821.852	1185.04	44
P53597	Succinyl-CoA ligase [ADP/GDP-forming] subunit alpha. mitochondrial	SUCLG1	105	541.744	483.257	1284.66	1164.05	1541.14	1331	182.548	1164.05	45
P10809	60 kDa heat shock protein. mitochondrial	HSPD1	473	352.844	660.215	1096.81	982.506	1754	2089.54	1399.82	1096.81	46
A0A0C4DFU2	Superoxide dismutase;Superoxide dismutase [Mn]. mitochondrial	SOD2	130	1300.49	143.331	969.082	641.056	3180.06	2210.16	1027.16	1027.16	47
Q02252-2	Methylmalonate-semialdehyde dehydrogenase [acylating]. mitochondrial	ALDH6A1	47	31.1387	554.676	1264.32	929.394	977.973	2379.77	1170.82	977.973	48
Q5QNZ2	ATP synthase F(0) complex subunit B1. mitochondrial	ATP5F1	172	2396.98	179.119	594.981	1019.34	976.407	2096.89	289.266	976.407	49
P00505	Aspartate aminotransferase. mitochondrial	GOT2	363	2124.74	829.571	611.848	3007.77	951.576	5928.34	204.888	951.576	50
P00505	Aspartate aminotransferase. mitochondrial	GOT2	309	170.492	116.743	827.795	1301.71	1704.91	5117.39	939.594	939.594	51
H7C579	Omega-amidase NIT2	NIT2	162	860.128	678.038	910.711	270.625	979.437	1473.62	1653.38	910.711	52
Q13423	NAD(P) transhydrogenase. mitochondrial	NNT	394	633.837	554.495	1218.98	887.032	1496.29	1430.05	230.092	887.032	53
Q9NPJ3	Acyl-coenzyme A thioesterase 13;Acyl-coenzyme A thioesterase 13. N-terminally processed	ACOT13	127	760.148	10.3702	576.035	859.009	1534.66	2078.59	1089.86	859.009	54
Q12931-2	Heat shock protein 75 kDa. mitochondrial	TRAP1	378	840.879	19.733	906.438	295.12	1183.29	2417.15	776.166	840.879	55
H0YL11;P48735	Isocitrate dehydrogenase [NADP]. mitochondrial	IDH2	193	847.409	63.0729	764.683	830.002	864.082	1484.21	656.676	830.002	56
P30038	Delta-1-pyrroline-5-carboxylate dehydrogenase. mitochondrial	ALDH4A1	93	2531.62	17.6906	766.029	1192.82	808.188	2406.76	524.139	808.188	57
A0A1B0GTB8	Carnitine O-palmitoyltransferase 2. mitochondrial	CPT2	56	178.03	33.9337	2515.96	628.15	1448.8	1554.93	767.915	767.915	58
P30049	ATP synthase subunit delta. mitochondrial	ATP5D	136	757.866	63.7407	448.837	461.468	3858.3	1449.71	860.623	757.866	59
O75947	ATP synthase subunit d. mitochondrial	ATP5H	78	549.04	364.377	752.907	720.61	2142.17	1073.49	769.501	752.907	60
G3V267;O43708	Maleylacetoacetate isomerase	GSTZ1	94	707.667	1095.11	39.7335	299.241	542.682	3366.05	1832.82	707.667	61
O75947	ATP synthase subunit d. mitochondrial	ATP5H	63	362.115	79.3456	451.744	798.514	1944.66	999.131	700.795	700.795	62
Q14118	Dystroglycan;Alpha-dystroglycan;Beta-dystroglycan	DAG1	782	184.158	382.071	790.182	1158.43	700.085	486.719	1221.74	700.085	63
Q08257-3	Quinone oxidoreductase	CRYZ	23	805.679	514.726	1864.94	645.507	58.9284	1514.21	691.097	691.097	64
C9J8Q5	Succinate-semialdehyde dehydrogenase. mitochondrial	ALDH5A1	337	2187.19	28.5538	687.668	642.708	465.435	983.643	751.551	687.668	65
Q9BRA2	Thioredoxin domain-containing protein 17	TXNDC17	89	63.0869	792.907	680.854	973.456	514.269	612.703	682.237	680.854	66
H3BLU7	Aflatoxin B1 aldehyde reductase member 2;Aflatoxin B1 aldehyde reductase member 4	AKR7A2;AKR7L	118	428.904	1112.61	772.072	660.104	399.681	1242.75	677.456	677.456	67
Q8NE86-3	Calcium uniporter protein. mitochondrial	MCU	170	208.826	202.928	1194.21	285.543	677.171	1692.68	851.637	677.171	68
P40926	Malate dehydrogenase. mitochondrial;Malate dehydrogenase	MDH2	324	89.4357	35.0299	923.979	628.848	1224.41	652.395	749.707	652.395	69
P42126-2	Enoyl-CoA delta isomerase 1. mitochondrial	ECI1;DCI	89	542.393	46.7931	485.063	636.136	717.906	1420.05	804.205	636.136	70
Q9NSE4	Isoleucine--tRNA ligase. mitochondrial	IARS2	277	489.475	9.09044	270.149	733.914	872.033	1519.94	627.684	627.684	71
P36542;P36542-2	ATP synthase subunit gamma. mitochondrial	ATP5C1	197	503.175	606.735	638.249	607.559	324.228	729.707	382.116	606.735	72
Q5JRX3	Presequence protease. mitochondrial	PITRM1	946	691.85	591.788	556.32	72.7367	473.658	706.86	701.148	591.788	73
Q6YN16	Hydroxysteroid dehydrogenase-like protein 2	HSDL2	87	234.598	19.5644	702.003	622.085	580.291	1548.02	574.073	580.291	74
M0QZ10	Branched-chain-amino-acid aminotransferase;Branched-chain-amino-acid aminotransferase. mitochondrial	BCAT2	44	437.327	298.368	434.446	1126.98	662.038	886.19	576.12	576.12	75
P48735	Isocitrate dehydrogenase [NADP]. mitochondrial	IDH2	384	717.583	63.514	574.994	381.16	687.032	1187.37	555.468	574.994	76
A0A0A0MSE2	Hydroxyacyl-coenzyme A dehydrogenase. mitochondrial	HADH	185	473.124	317.455	657.48	565.761	752.749	1149.37	449.765	565.761	77
M0QWZ7	Serine--tRNA ligase. mitochondrial	SARS2	110	294.494	139.031	461.841	551.232	1063.86	2307.61	850.501	551.232	78
A0A087WXC5	NADH dehydrogenase [ubiquinone] 1 alpha subcomplex subunit 10. mitochondrial	NDUFA10	80	1061.52	8.81525	421.862	439.526	732.974	945.255	549.433	549.433	79
P40939	Trifunctional enzyme subunit alpha. mitochondrial;Long-chain enoyl-CoA hydratase;Long chain 3-hydroxyacyl-CoA dehydrogenase	HADHA	326	1114.18	287.278	359.424	305.554	1411.12	812.754	529.696	529.696	80
P40227	T-complex protein 1 subunit zeta	CCT6A	377	485.983	49.824	301.46	816.929	520.055	648.342	461.674	485.983	81
O75947	ATP synthase subunit d. mitochondrial	ATP5H	117	1022.64	255.745	307.03	466.773	643.157	817.894	359.558	466.773	82
A0A0A0MT83	Isovaleryl-CoA dehydrogenase. mitochondrial	IVD	78	323.424	321.353	134.803	653.252	510.391	1103.28	453.874	453.874	83
Q9NRG7-2	Epimerase family protein SDR39U1	SDR39U1	91	445.025	781.433	147.406	2258.96	434.458	1740.39	40.7149	445.025	84
P48735	Isocitrate dehydrogenase [NADP]. mitochondrial	IDH2	106	269.094	302.132	444.583	470.216	1031.51	569.696	187.824	444.583	85
P60709;P63261;P68032;P68133	Actin. cytoplasmic 1;Actin. cytoplasmic 1. N-terminally processed;Actin. cytoplasmic 2;Actin. cytoplasmic 2. N-terminally processed;Actin. alpha cardiac muscle 1;Actin. aortic smooth muscle;Actin. gamma-enteric smooth muscle;Actin. alpha skeletal muscle	ACTB;ACTG1;ACTC1;ACTA2;ACTG2;ACTA1	328	394.819	1003.75	361.605	4694.83	1044.4	429.17	438.936	438.936	86
P40926	Malate dehydrogenase. mitochondrial;Malate dehydrogenase	MDH2	301	436.532	437.608	279.241	479.478	571.745	622.741	133.307	437.608	87
Q6NVY1	3-hydroxyisobutyryl-CoA hydrolase. mitochondrial	HIBCH	301	672.957	4.01253	314.924	546.781	417.525	2411.07	388.057	417.525	88
A0A0C4DFU2	Superoxide dismutase;Superoxide dismutase [Mn]. mitochondrial	SOD2	122	893.956	269.2	431.419	414.384	112.505	854.095	363.075	414.384	89
P42765	3-ketoacyl-CoA thiolase. mitochondrial	ACAA2	13	251.605	410.849	555.117	255.283	515.936	834.994	55.6048	410.849	90
P30405	Peptidyl-prolyl cis-trans isomerase F. mitochondrial;Peptidyl-prolyl cis-trans isomerase	PPIF	86	1843.83	25.6038	265.571	408.368	770.863	1252.47	178.361	408.368	91
O75947	ATP synthase subunit d. mitochondrial	ATP5H	72	78.7936	21.2496	508.457	210.34	1382.53	706.363	403.53	403.53	92
O75947	ATP synthase subunit d. mitochondrial	ATP5H	63	78.7936	21.2496	508.457	210.34	1382.53	706.363	403.53	403.53	93
Q16698-2	2.4-dienoyl-CoA reductase. mitochondrial	DECR1	235	375.322	115.619	314.373	576.386	840.756	1246.28	142.232	375.322	94
Q15424-2	Scaffold attachment factor B1;Scaffold attachment factor B2	SAFB;SAFB2	225	43.666	12.1698	309.388	1396.78	911.049	980.455	373.953	373.953	95
Q02252-2	Methylmalonate-semialdehyde dehydrogenase [acylating]. mitochondrial	ALDH6A1	108	128.543	197.385	390.535	364.343	592.952	793.861	347.899	364.343	96
O14561	Acyl carrier protein. mitochondrial;Acyl carrier protein	NDUFAB1	88	283.586	37.4664	364.277	361.603	581.162	686.807	427.011	364.277	97
Q9UJZ1-2	Stomatin-like protein 2. mitochondrial	STOML2	145	43.3275	181.521	363.441	431.606	374.551	927.96	262.967	363.441	98
P35270	Sepiapterin reductase	SPR	247	359.258	2.74379	201.981	233.113	377.545	596.445	405.524	359.258	99
K7EK07;P68431;Q5TEC6;Q71DI3	Histone H3;Histone H3.3;Histone H3.3C;Histone H3.1;Histone H3.2	H3F3B;H3F3A;H3F3C;HIST1H3A;HIST2H3PS2;HIST2H3A	19	1235.41	1.22356	514.508	815.177	344.952	215.103	40.3882	344.952	100
K7EK07;P68431;Q5TEC6;Q71DI3	Histone H3;Histone H3.3;Histone H3.3C;Histone H3.1;Histone H3.2	H3F3B;H3F3A;H3F3C;HIST1H3A;HIST2H3PS2;HIST2H3A	24	1235.41	1.34028	514.508	815.177	344.952	215.103	40.3882	344.952	101
P35914-3	Hydroxymethylglutaryl-CoA lyase. mitochondrial	HMGCL	48	261.932	20.8982	3267	331.501	427.224	1203.57	94.0743	331.501	102
P53778-2	Mitogen-activated protein kinase 12	MAPK12	342	12.6473	440.774	151.008	703.821	316.652	329.609	720.467	329.609	103
P43155-2	Carnitine O-acetyltransferase	CRAT	588	2367.71	113.835	328.324	236.962	406.807	671.65	169.076	328.324	104
P08559	Pyruvate dehydrogenase E1 component subunit alpha. somatic form. mitochondrial	PDHA1	321	32.7063	102.526	556.411	277.244	341.787	632.044	326.636	326.636	105
P08559	Pyruvate dehydrogenase E1 component subunit alpha. somatic form. mitochondrial	PDHA1	313	32.7063	102.526	556.411	277.244	341.787	632.044	326.636	326.636	106
P42765	3-ketoacyl-CoA thiolase. mitochondrial	ACAA2	269	118.266	16.616	326.424	348.31	687.629	702.762	256.717	326.424	107
C9JVN9	L-2-hydroxyglutarate dehydrogenase. mitochondrial	L2HGDH	155	67.9122	308.604	524.234	739.434	567.297	325.456	98.3904	325.456	108
G5E9X5	Methylcrotonoyl-CoA carboxylase subunit alpha. mitochondrial	MCCC1	257	53.4102	75.0532	1336.39	311.819	476.474	2237.79	247.435	311.819	109
O00330-3	Pyruvate dehydrogenase protein X component. mitochondrial	PDHX	445	257.9	151.913	522.77	405.263	302.212	658.574	216.216	302.212	110
S4R3W9	39S ribosomal protein L19. mitochondrial	MRPL19	123	655.296	42.713	4198.09	255.049	295.642	344.086	246.984	295.642	111
P20962	Parathymosin	PTMS	15	229.092	110.417	98.8543	354.134	437.616	300.595	295.332	295.332	112
H0YDD4	Acetyltransferase component of pyruvate dehydrogenase complex;Dihydrolipoyllysine-residue acetyltransferase component of pyruvate dehydrogenase complex. mitochondrial	DLAT	200	172.902	38.7211	265.327	304.474	1476.79	366.317	293.208	293.208	113
P06733	Alpha-enolase;Enolase	ENO1	5	291.122	3.58576	267.349	284.028	443.211	320.882	23.7508	284.028	114
O14561	Acyl carrier protein. mitochondrial;Acyl carrier protein	NDUFAB1	97	543.539	65.9941	134.672	156.899	654.572	487.097	280.827	280.827	115
P09622	Dihydrolipoyl dehydrogenase. mitochondrial;Dihydrolipoyl dehydrogenase	DLD	267	265.959	27.0892	218.247	451.828	249.659	607.899	341.513	265.959	116
C9J8Q5	Succinate-semialdehyde dehydrogenase. mitochondrial	ALDH5A1	359	72.9063	5.13781	265.321	222.563	398.386	679.182	267.08	265.321	117
A0A087WYT3	Prostaglandin E synthase 3	PTGES3	37	36.7022	383.347	305.177	186.073	161.359	265.25	298.653	265.25	118
O75947	ATP synthase subunit d. mitochondrial	ATP5H	95	245.182	190.021	232.228	264.873	495.281	692.421	330.702	264.873	119
Q6NVY1	3-hydroxyisobutyryl-CoA hydrolase. mitochondrial	HIBCH	73	730.095	80.4634	240.992	263.854	269.487	693.088	40.5668	263.854	120
P00505	Aspartate aminotransferase. mitochondrial	GOT2	234	163.762	10.0152	431.893	387.742	263.534	699.097	39.5949	263.534	121
P36957	Dihydrolipoyllysine-residue succinyltransferase component of 2-oxoglutarate dehydrogenase complex. mitochondrial	DLST	277	272.514	59.8516	269.281	257.732	239.409	455.8	144.973	257.732	122
E5RGS7	PDZ and LIM domain protein 2	PDLIM2	76	11673.9	152.268	34.0102	7187.33	701.849	257.379	170.737	257.379	123
P12270	Nucleoprotein TPR	TPR	748	1151.77	82.3439	287.156	667.794	218.318	135.617	254.332	254.332	124
A0A0C4DGA2	Enoyl-CoA delta isomerase 2. mitochondrial	ECI2	309	238.784	256.559	253.523	245.378	707.669	661.238	46.2623	253.523	125
Q5QNZ2	ATP synthase F(0) complex subunit B1. mitochondrial	ATP5F1	183	253.08	51.605	3.45996	512.379	347.295	921.428	1.52175	253.08	126
P40939	Trifunctional enzyme subunit alpha. mitochondrial;Long-chain enoyl-CoA hydratase;Long chain 3-hydroxyacyl-CoA dehydrogenase	HADHA	516	84.1824	7.98448	321.281	335.761	251.132	380.75	42.9999	251.132	127
H0Y8Z9	Acyl-CoA dehydrogenase family member 9. mitochondrial	ACAD9	371	406.406	68.1699	307.656	66.9596	324.437	247.879	50.8433	247.879	128
P10809	60 kDa heat shock protein. mitochondrial	HSPD1	191	169.151	13.2884	179.115	247.057	288.457	499.085	270.673	247.057	129
P31040-2	Succinate dehydrogenase [ubiquinone] flavoprotein subunit. mitochondrial	SDHA	493	632.828	231.988	71.1507	238.994	467.959	762.822	244.66	244.66	130
P40939	Trifunctional enzyme subunit alpha. mitochondrial;Long-chain enoyl-CoA hydratase;Long chain 3-hydroxyacyl-CoA dehydrogenase	HADHA	353	344.983	225.719	264.067	264.891	117.195	239.537	157.782	239.537	131
Q8TCS8	Polyribonucleotide nucleotidyltransferase 1. mitochondrial	PNPT1	285	754.343	237.576	405.713	169.94	136.376	426.877	38.9593	237.576	132
Q92947	Glutaryl-CoA dehydrogenase. mitochondrial	GCDH	240	281.729	106.242	21.2902	163.957	693.732	753.172	233.396	233.396	133
P50213-2	Isocitrate dehydrogenase [NAD] subunit alpha. mitochondrial	IDH3A	22	66.5217	5.97496	619.183	271.538	578.933	231.711	160.539	231.711	134
Q96DG6	Carboxymethylenebutenolidase homolog	CMBL	193	102.999	1.09112	227.873	559.623	3.18015	460.655	1283.13	227.873	135
B7Z9I1	Medium-chain specific acyl-CoA dehydrogenase. mitochondrial	ACADM	220	37.8637	99.7071	284.326	226.396	376.898	398.304	132.958	226.396	136
P48047	ATP synthase subunit O. mitochondrial	ATP5O	192	437.754	79.709	222.483	154.739	199.944	484.966	314.463	222.483	137
P40939	Trifunctional enzyme subunit alpha. mitochondrial;Long-chain enoyl-CoA hydratase;Long chain 3-hydroxyacyl-CoA dehydrogenase	HADHA	728	137.828	31.3661	218.588	277.671	418.554	661.082	134.375	218.588	138
P09622	Dihydrolipoyl dehydrogenase. mitochondrial;Dihydrolipoyl dehydrogenase	DLD	143	1752.56	27.6705	219.852	156.651	216.069	659.361	217.557	217.557	139
E9PRS8	Cysteine--tRNA ligase. cytoplasmic	CARS	48	52.7723	475.874	240.081	285.055	137.71	213.948	132.351	213.948	140
Q16698-2	2.4-dienoyl-CoA reductase. mitochondrial	DECR1	40	135.176	16.4632	213.234	298.526	275.331	425.412	183.359	213.234	141
O00330-3	Pyruvate dehydrogenase protein X component. mitochondrial	PDHX	476	318.842	89.1078	212.414	119.485	341.208	297.958	194.763	212.414	142
P13073	Cytochrome c oxidase subunit 4 isoform 1. mitochondrial	COX4I1	60	352.81	116.582	187.313	221.715	218.739	211.106	122.231	211.106	143
P06576	ATP synthase subunit beta. mitochondrial;ATP synthase subunit beta	ATP5B	133	136.914	8.16601	444.086	207.059	153.519	278.471	223.95	207.059	144
Q6NVY1	3-hydroxyisobutyryl-CoA hydrolase. mitochondrial	HIBCH	353	204.427	157.131	391.7	186.923	301.825	778.496	80.4508	204.427	145
P03928	ATP synthase protein 8	MT-ATP8	40	129.771	41.3608	239.351	202.71	211.614	430.29	120.081	202.71	146
P40939	Trifunctional enzyme subunit alpha. mitochondrial;Long-chain enoyl-CoA hydratase;Long chain 3-hydroxyacyl-CoA dehydrogenase	HADHA	531	119.671	14.3639	202.451	256.758	326.073	447.694	118.77	202.451	147
Q9NZJ6	Ubiquinone biosynthesis O-methyltransferase. mitochondrial	COQ3	134	329.447	131.827	201.348	178.004	13.4616	450.96	245.287	201.348	148
O00330-3	Pyruvate dehydrogenase protein X component. mitochondrial	PDHX	310	200.49	5.85139	149.363	297.481	180.353	497.263	290.252	200.49	149
P78417	Glutathione S-transferase omega-1	GSTO1	160	198.656	228.748	198.681	308.672	114.67	193.179	101.752	198.656	150
E9PH64	NADH dehydrogenase [ubiquinone] 1 beta subcomplex subunit 9	NDUFB9	110	220.01	147.472	150.596	163.14	261.789	227.26	197.975	197.975	151
P31040-2	Succinate dehydrogenase [ubiquinone] flavoprotein subunit. mitochondrial	SDHA	131	121.151	0.874553	194.001	284.638	396.713	896.23	152.913	194.001	152
Q5R3B4	Mitochondrial pyruvate carrier 2	MPC2	19	49.5051	18.4497	5.52601	258.904	192.391	550.666	200.875	192.391	153
Q08257-3	Quinone oxidoreductase	CRYZ	208	205.499	59.023	20.0264	186.446	185.082	673.824	172.816	185.082	154
P31937	3-hydroxyisobutyrate dehydrogenase. mitochondrial	HIBADH	149	111.719	91.4403	219.068	174.58	317.573	534.634	183.246	183.246	155
Q96DG6	Carboxymethylenebutenolidase homolog	CMBL	36	354.244	181.522	143.383	208.153	89.0528	187.208	169.175	181.522	156
P18859	ATP synthase-coupling factor 6. mitochondrial	ATP5J	105	0.3459	115.841	182.675	178.724	222.644	258.875	70.1928	178.724	157
H0YDD4	Acetyltransferase component of pyruvate dehydrogenase complex;Dihydrolipoyllysine-residue acetyltransferase component of pyruvate dehydrogenase complex. mitochondrial	DLAT	194	327.326	2.71588	110.266	202.862	318.916	2.69679	177.444	177.444	158
P40926	Malate dehydrogenase. mitochondrial;Malate dehydrogenase	MDH2	314	120.312	78.8972	194.445	176.257	303.44	177.926	153.815	176.257	159
P48047	ATP synthase subunit O. mitochondrial	ATP5O	54	1119.92	31.7223	174.261	174.793	143.178	442.698	176.698	174.793	160
P62937	Peptidyl-prolyl cis-trans isomerase A;Peptidyl-prolyl cis-trans isomerase A. N-terminally processed;Peptidyl-prolyl cis-trans isomerase	PPIA	28	147.716	306.165	217.553	736.248	36.8017	173.329	45.6604	173.329	161
E9PN17	ATP synthase subunit g. mitochondrial	ATP5L	24	133.512	44.3768	171.823	35.0689	485.454	314.748	194.194	171.823	162
Q04446	1.4-alpha-glucan-branching enzyme	GBE1	645	151.968	169.479	54.9128	30.8639	185.307	228.408	180.252	169.479	163
P00367	Glutamate dehydrogenase 1. mitochondrial	GLUD1	84	113.578	7.69507	304.566	189.303	166.728	347.737	82.4171	166.728	164
P40939	Trifunctional enzyme subunit alpha. mitochondrial;Long-chain enoyl-CoA hydratase;Long chain 3-hydroxyacyl-CoA dehydrogenase	HADHA	60	150.208	6.90778	178.978	148.711	228.012	352.507	163.85	163.85	165
A0A1B0GW44	Cathepsin D;Cathepsin D light chain;Cathepsin D heavy chain	CTSD	334	58.8023	7.86709	9.49756	428.712	441.531	163.131	221.467	163.131	166
J3KS22	L-xylulose reductase	DCXR	169	1032.37	132.95	162.718	103.329	746.967	1030.18	150.598	162.718	167
P18859	ATP synthase-coupling factor 6. mitochondrial	ATP5J	99	161.194	56.7621	103.917	185.062	191.593	199.389	54.3455	161.194	168
O14548	Cytochrome c oxidase subunit 7A-related protein. mitochondrial	COX7A2L	65	44.2412	48.382	1918.6	5991.25	153.306	91.2298	192.528	153.306	169
P31040-2	Succinate dehydrogenase [ubiquinone] flavoprotein subunit. mitochondrial	SDHA	499	2131.99	65.5689	144.349	101.034	249.362	496.005	104.398	144.349	170
P10809	60 kDa heat shock protein. mitochondrial	HSPD1	202	105.212	136.898	196.32	227.026	106.543	300.052	126.247	136.898	171
P10809	60 kDa heat shock protein. mitochondrial	HSPD1	396	148.836	1.01145	69.1267	94.4351	136.552	300.353	167.252	136.552	172
P49189	4-trimethylaminobutyraldehyde dehydrogenase	ALDH9A1	310	47.5473	135.311	232.723	101.073	128.474	317.881	174.425	135.311	173
P00915	Carbonic anhydrase 1	CA1	169	85.0659	12.0606	130.688	175.152	103.721	238.506	145.547	130.688	174
P22033	Methylmalonyl-CoA mutase. mitochondrial	MUT	465	130.44	122.932	196.69	130.216	230.097	337.372	11.2125	130.44	175
P11055;P12882;Q9UKX2;Q9UKX3;Q9Y623	Myosin-3;Myosin-1;Myosin-2;Myosin-13;Myosin-4	MYH3;MYH1;MYH2;MYH13;MYH4	NaN	68.8941	224.081	128.422	118.371	179.941	130.657	121.901	128.422	176
P50461	Cysteine and glycine-rich protein 3	CSRP3	109	149.523	6.7684	132.907	128.514	93.2893	126.822	89.6678	126.822	177
O00330-3	Pyruvate dehydrogenase protein X component. mitochondrial	PDHX	203	37.3923	7.09345	179.97	144.121	288.672	122.649	86.6548	122.649	178
P42126-2	Enoyl-CoA delta isomerase 1. mitochondrial	ECI1	61	34.9083	30.4955	120.61	33.1661	249.757	193.368	129.933	120.61	179
P62937	Peptidyl-prolyl cis-trans isomerase A;Peptidyl-prolyl cis-trans isomerase A. N-terminally processed;Peptidyl-prolyl cis-trans isomerase	PPIA	44	3.35362	6.11546	91.2541	237.765	175.987	148.151	120.386	120.386	180
Q9Y4W6	AFG3-like protein 2	AFG3L2	719	36.8274	104.809	237.533	120.2	140.458	135.369	45.3124	120.2	181
V9GYG0	ADP/ATP translocase 1	SLC25A4	23	118.567	89.6583	127.849	206.916	78.4834	187.098	37.9265	118.567	182
P42765	3-ketoacyl-CoA thiolase. mitochondrial	ACAA2	234	25.8897	50.7586	275.604	148.627	117.879	213.949	114.328	117.879	183
Q9Y4W6	AFG3-like protein 2	AFG3L2	710	25.5761	100.319	535.277	123.104	85.947	253.674	115.886	115.886	184
G3V267;O43708	Maleylacetoacetate isomerase	GSTZ1	191	15.1958	12.7028	102.388	113.851	290.771	184.459	3189.81	113.851	185
P43155-2	Carnitine O-acetyltransferase	CRAT	369	113.65	57.9158	72.2726	794.92	728.716	912.43	69.7222	113.65	186
P40939	Trifunctional enzyme subunit alpha. mitochondrial;Long-chain enoyl-CoA hydratase;Long chain 3-hydroxyacyl-CoA dehydrogenase	HADHA	411	463.828	0.865207	103.279	156.843	71.1143	205.019	112.701	112.701	187
O43678	NADH dehydrogenase [ubiquinone] 1 alpha subcomplex subunit 2	NDUFA2	13	1.07831	7.18608	112.135	105.978	207.617	643.59	120.003	112.135	188
Q8N335	Glycerol-3-phosphate dehydrogenase 1-like protein;Glycerol-3-phosphate dehydrogenase [NAD(+)]	GPD1L	33	2.97061	171.599	196.976	111.348	64.11	184.199	2.35654	111.348	189
Q9UBY9	Heat shock protein beta-7	HSPB7;DKFZp779D0968	111	108.778	244.629	75.2383	167.386	592.394	96.3628	81.2713	108.778	190
Q9P2R7-2	Succinyl-CoA ligase [ADP-forming] subunit beta. mitochondrial	SUCLA2	66	61.2115	114.86	243.375	107.625	84.3885	341.194	41.2478	107.625	191
Q06830	Peroxiredoxin-1	PRDX1	7	93.4342	3.31813	133.133	306.67	105.588	7.03489	211.178	105.588	192
P10809	60 kDa heat shock protein. mitochondrial	HSPD1	469	104.356	1.96162	100.157	83.6243	180.518	339.738	157.152	104.356	193
P10606	Cytochrome c oxidase subunit 5B. mitochondrial	COX5B	56	133.216	60.5099	113.251	103.559	22.2001	169.563	79.379	103.559	194
P06733	Alpha-enolase	ENO1	228	52.0352	85.9674	123.165	169.569	148.558	103.17	3.08433	103.17	195
Q9NVH6-4	Trimethyllysine dioxygenase. mitochondrial	TMLHE	236	102.526	73.1725	101.853	180.183	76.4331	769.997	150.943	102.526	196
F2Z3L7	Protein NipSnap homolog 3B	NIPSNAP3B	57	17.4338	209.163	318.997	100.872	34.764	310.395	72.2887	100.872	197
Q96I99	Succinyl-CoA ligase [GDP-forming] subunit beta. mitochondrial	SUCLG2	423	246.696	10.5493	29.6894	31.0907	404.346	301.901	99.9414	99.9414	198
Q9UKX2	Myosin-2	MYH2	1489	23.2384	99.8635	119.388	216.264	135.618	70.7271	9.522	99.8635	199
A0A0D9SGD3	Putative deoxyribonuclease TATDN1	TATDN1	76	151.382	53.0712	99.5229	63.9725	89.35	240.762	193.768	99.5229	200
P09622	Dihydrolipoyl dehydrogenase. mitochondrial;Dihydrolipoyl dehydrogenase	DLD	277	196.779	99.4045	89.3851	135.937	77.5306	155.352	43.8908	99.4045	201
G3V0I5	NADH dehydrogenase [ubiquinone] flavoprotein 1. mitochondrial	NDUFV1	29	108.488	12.0481	95.1366	64.9984	130.173	179.035	80.5158	95.1366	202
P43155-2	Carnitine O-acetyltransferase	CRAT	247	38.383	33.697	99.1167	44.4837	131.593	217.969	93.6893	93.6893	203
P43155-2	Carnitine O-acetyltransferase	CRAT	249	38.383	33.697	99.1167	44.4837	131.593	217.969	93.6893	93.6893	204
O00330-3	Pyruvate dehydrogenase protein X component. mitochondrial	PDHX	473	92.2963	2.59484	168.339	41.8216	141.357	383.946	63.0982	92.2963	205
O00330-3	Pyruvate dehydrogenase protein X component. mitochondrial	PDHX	476	92.2963	9.90101	168.339	41.8216	141.357	383.946	63.0982	92.2963	206
P60709;P63261;P68032;P68133	Actin. cytoplasmic 1;Actin. cytoplasmic 1. N-terminally processed;Actin. cytoplasmic 2;Actin. cytoplasmic 2. N-terminally processed;Actin. alpha cardiac muscle 1;Actin. aortic smooth muscle;Actin. gamma-enteric smooth muscle;Actin. alpha skeletal muscle	ACTB;ACTG1;ACTC1;ACTA2;ACTG2;ACTA1	63	154.181	209.876	54.0518	410.424	90.8854	81.9999	46.5123	90.8854	207
E9PN17	ATP synthase subunit g. mitochondrial	ATP5L	66	90.5973	45.1164	125.437	46.8207	181.31	238.789	10.7174	90.5973	208
P31937	3-hydroxyisobutyrate dehydrogenase. mitochondrial	HIBADH	39	14.5932	21.7991	151.959	90.4669	98.7186	314.269	57.6396	90.4669	209
P08133	Annexin A6;Annexin	ANXA6	442	89.8079	3.93652	53.3336	100.516	98.0604	94.8994	8.55164	89.8079	210
K7EK07;P68431;Q5TEC6;Q71DI3	Histone H3;Histone H3.3;Histone H3.3C;Histone H3.1;Histone H3.2	H3F3B;H3F3A;H3F3C;HIST1H3A;HIST2H3PS2;HIST2H3A	24	906.472	1.29344	89.7555	134.681	84.2325	127.106	66.5625	89.7555	211
P49189	4-trimethylaminobutyraldehyde dehydrogenase	ALDH9A1	30	8.37909	76.2864	91.4978	76.3202	206.296	175.419	89.5277	89.5277	212
P36957	Dihydrolipoyllysine-residue succinyltransferase component of 2-oxoglutarate dehydrogenase complex. mitochondrial	DLST	267	4.61085	63.2717	189.133	77.7071	206.058	257.679	87.2797	87.2797	213
P36957	Dihydrolipoyllysine-residue succinyltransferase component of 2-oxoglutarate dehydrogenase complex. mitochondrial	DLST	272	4.61085	63.2717	189.133	77.7071	206.058	257.679	87.2797	87.2797	214
A0A087WUQ6	Glutathione peroxidase;Glutathione peroxidase 1	GPX1	96	4.69323	11.9458	88.4507	85.4493	180.79	206.312	37.242	85.4493	215
O75947	ATP synthase subunit d. mitochondrial	ATP5H	85	224.226	19.1042	28.6985	85.0449	93.1818	105.025	44.7959	85.0449	216
A0A087X2E5	Isocitrate dehydrogenase [NAD] subunit. mitochondrial;Isocitrate dehydrogenase [NAD] subunit beta. mitochondrial	IDH3B	105	40.1643	87.0439	318.398	70.645	16.0819	259.904	82.5893	82.5893	217
Q16775-2	Hydroxyacylglutathione hydrolase. mitochondrial	HAGH	68	85.8266	70.6444	1.40219	95.8563	50.0298	81.0644	88.036	81.0644	218
B4DJV2	Citrate synthase;Citrate synthase. mitochondrial	CS	90	11.9398	1.35219	0.703313	181.723	149.338	732.896	80.8068	80.8068	219
P50461	Cysteine and glycine-rich protein 3	CSRP3	113	96.0784	7.71724	78.0035	102.464	80.3325	101.339	65.3603	80.3325	220
P25705	ATP synthase subunit alpha. mitochondrial	ATP5A1	539	166.668	27.6315	113.688	79.3263	71.5876	184.415	77.7223	79.3263	221
P10412;P16402;P16403	Histone H1.4;Histone H1.3;Histone H1.2	HIST1H1E;HIST1H1D;HIST1H1C	46	14.0054	36.6005	15.1474	129.816	87.4718	77.6819	104.037	77.6819	222
P07305-2	Histone H1.0;Histone H1.0. N-terminally processed	H1F0	65	21.9752	7.32148	77.5746	234.785	54.2168	99.1188	89.9788	77.5746	223
Q15233-2	Non-POU domain-containing octamer-binding protein	NONO	378	19.2978	162.47	93.6827	92.4264	43.6243	38.613	77.5134	77.5134	224
P61970	Nuclear transport factor 2	NUTF2	55	34.5883	3.30604	127.139	108.616	164.692	41.8784	74.8247	74.8247	225
P30048-2	Thioredoxin-dependent peroxide reductase. mitochondrial	PRDX3	73	136.637	42.0588	48.399	74.3385	121.62	95.2944	37.3931	74.3385	226
Q96HC4-3	PDZ and LIM domain protein 5	PDLIM5	97	47.8104	74.1231	103.622	162.94	68.7381	116.644	8.40329	74.1231	227
C9J406;H7C463;Q16891-2	MICOS complex subunit MIC60	IMMT	416	176.832	21.4031	6.47461	88.9743	100.59	72.8915	17.0147	72.8915	228
P24752	Acetyl-CoA acetyltransferase. mitochondrial	ACAT1	78	15.0797	38.6087	16.8136	83.6822	130.366	123.506	72.3412	72.3412	229
Q6NVY1	3-hydroxyisobutyryl-CoA hydrolase. mitochondrial	HIBCH	233	179.032	5.73748	90.283	76.295	71.8631	7.24001	67.6057	71.8631	230
P30041	Peroxiredoxin-6	PRDX6	56	50.6953	0.151496	51.8331	71.3797	77.9884	80.8444	77.8495	71.3797	231
A0A0C4DGA2	Enoyl-CoA delta isomerase 2. mitochondrial	ECI2	274	38.6839	7.97505	36.8837	92.9181	74.7214	129.996	70.8436	70.8436	232
P25705	ATP synthase subunit alpha. mitochondrial	ATP5A1	230	4.5278	0.915676	69.5146	86.9633	69.2337	124.794	48.077	69.2337	233
Q9NZJ6	Ubiquinone biosynthesis O-methyltransferase. mitochondrial	COQ3	196	81.1056	17.7135	45.0817	68.6934	68.757	245.696	77.2518	68.757	234
P28331	NADH-ubiquinone oxidoreductase 75 kDa subunit. mitochondrial	NDUFS1	467	312.106	0.380866	66.495	68.3779	213.513	270.576	28.356	68.3779	235
F6WQW2	Ran-specific GTPase-activating protein	RANBP1	227	169.704	44.3048	35.4172	136.468	228.166	63.7622	68.1568	68.1568	236
P61604	10 kDa heat shock protein. mitochondrial	HSPE1	66	34.2747	60.4662	89.5246	69.2199	41.4697	131.37	68.067	68.067	237
Q16762	Thiosulfate sulfurtransferase	TST	24	76.4008	14.3104	125.17	68.0146	19.5145	275.336	48.5289	68.0146	238
P09622	Dihydrolipoyl dehydrogenase. mitochondrial;Dihydrolipoyl dehydrogenase	DLD	122	224.451	46.505	48.7847	107.584	57.6486	120.936	67.4172	67.4172	239
P60903	Protein S100-A10	S100A10	37	12.4226	46.3233	65.612	76.1271	89.7851	71.0821	54.7158	65.612	240
O60662	Kelch-like protein 41	KLHL41	471	0.382144	2.01842	55.3064	103.125	94.8131	103.083	64.7225	64.7225	241
Q96DC8	Enoyl-CoA hydratase domain-containing protein 3. mitochondrial	ECHDC3	65	47.3787	9.11679	68.9404	88.6884	64.6853	225.122	22.062	64.6853	242
O75208	Ubiquinone biosynthesis protein COQ9. mitochondrial	COQ9	175	47.0788	50.3892	64.1856	74.6859	82.8414	188.888	8.78411	64.1856	243
P17612-2	cAMP-dependent protein kinase catalytic subunit alpha;cAMP-dependent protein kinase catalytic subunit beta	PRKACA;PRKACB	272	36.9554	9.20396	51.1162	124.8	118.278	251.671	64.0971	64.0971	244
P04040	Catalase	CAT	476	27.7748	49.9708	78.9265	63.7315	75.3138	49.5078	226.24	63.7315	245
P17540	Creatine kinase S-type. mitochondrial;Creatine kinase U-type. mitochondrial	CKMT2;CKMT1A;CKMT1B	276	410.81	14.9305	43.0659	230.134	31.7332	63.9469	62.9145	62.9145	246
P35232	Prohibitin	PHB	202	70.0508	21.0393	53.7965	51.2014	62.746	74.6814	63.6557	62.746	247
P19367-4	Hexokinase-1	HK1	321	6.1295	46.3435	115.414	70.5091	62.6022	20.0787	69.0114	62.6022	248
Q5JRX3	Presequence protease. mitochondrial	PITRM1	473	20.1955	62.3642	28.3508	51.9149	66.4736	141.203	124.215	62.3642	249
P37837	Transaldolase	TALDO1	286	283.452	20.3673	14.5527	74.3515	102.146	55.8943	62.3011	62.3011	250
O95139	NADH dehydrogenase [ubiquinone] 1 beta subcomplex subunit 6	NDUFB6	9	204.182	12.1757	62.2583	17.6454	83.5806	217.516	38.7293	62.2583	251
P16219	Short-chain specific acyl-CoA dehydrogenase. mitochondrial	ACADS	51	44.1391	12.9258	62.0932	17.7803	186.556	88.1422	62.5907	62.0932	252
P55809	Succinyl-CoA:3-ketoacid coenzyme A transferase 1. mitochondrial	OXCT1	185	22.6033	39.8366	145.324	61.9285	26.8311	93.983	292.071	61.9285	253
Q9UIJ7	GTP:AMP phosphotransferase AK3. mitochondrial	AK3	165	145.771	38.0466	55.7121	42.066	60.5725	175.304	69.9273	60.5725	254
P02545	Prelamin-A/C;Lamin-A/C	LMNA	155	5.59183	1.2872	32.9262	60.2707	62.0534	95.9956	108.158	60.2707	255
P05091	Aldehyde dehydrogenase. mitochondrial	ALDH2	368	4.46381	32.5115	81.2141	59.8135	76.2464	134.707	20.2599	59.8135	256
P48047	ATP synthase subunit O. mitochondrial	ATP5O	70	1.19748	0.660462	134.459	75.5126	59.5236	191.762	48.5171	59.5236	257
Q00872-10;Q00872-4	Myosin-binding protein C. slow-type	MYBPC1	801	1.31727	1.32882	58.8723	78.5768	48.1586	94.3257	73.2011	58.8723	258
Q13423	NAD(P) transhydrogenase. mitochondrial	NNT	403	254.694	40.5315	58.7245	125.057	84.7128	4.00521	2.19972	58.7245	259
P00505	Aspartate aminotransferase. mitochondrial	GOT2	404	98.0651	48.8693	45.9886	58.7152	104.409	144.294	18.8547	58.7152	260
Q03252	Lamin-B2	LMNB2	123	4.99326	6.96832	58.7081	132.124	53.3309	254.38	212.855	58.7081	261
P49189	4-trimethylaminobutyraldehyde dehydrogenase	ALDH9A1	303	7.81839	20.1391	88.8457	76.9096	12.4237	58.1187	60.1997	58.1187	262
P04075	Fructose-bisphosphate aldolase A;Fructose-bisphosphate aldolase	ALDOA	42	56.8965	1.72056	44.1066	93.2174	68.2667	105.268	58.042	58.042	263
P69905	Hemoglobin subunit alpha	HBA1	8	64.1245	74.2128	33.2014	86.2781	3.09915	57.3125	43.4376	57.3125	264
H0YHM6	Alpha-aminoadipic semialdehyde dehydrogenase	ALDH7A1	91	19.3806	39.1239	56.6981	53.3145	69.4718	290.89	91.0811	56.6981	265
P26641	Elongation factor 1-gamma	EEF1G	294	31.6527	4.44659	43.0623	73.9283	139.102	101.543	56.3412	56.3412	266
A0A286YFB1;C9JZN9;H9KVA2	Troponin T. fast skeletal muscle	TNNT3	123	229.869	68.9804	37.5415	95.7844	55.786	40.9333	12.2804	55.786	267
Q5QNZ2	ATP synthase F(0) complex subunit B1. mitochondrial	ATP5F1	93	719.687	55.2673	38.2226	32.5505	170.776	102.477	32.5776	55.2673	268
P24752	Acetyl-CoA acetyltransferase. mitochondrial	ACAT1	302	28.9073	7.79459	56.7878	55.2465	67.8661	111.156	4.29	55.2465	269
A0A087X0W7	Acyl-coenzyme A thioesterase 1;Acyl-coenzyme A thioesterase 2. mitochondrial	ACOT2;ACOT1	42	153.563	8.23964	33.6578	54.8361	58.9063	105.112	20.8057	54.8361	270
C9J8Q5	Succinate-semialdehyde dehydrogenase. mitochondrial	ALDH5A1	366	5.82361	54.6657	136.451	120.366	52.9473	160.193	47.3005	54.6657	271
B4DJV2	Citrate synthase;Citrate synthase. mitochondrial	CS	314	1.87746	4.39371	66.11	54.3936	41.7704	162.933	76.9791	54.3936	272
P09622	Dihydrolipoyl dehydrogenase. mitochondrial;Dihydrolipoyl dehydrogenase	DLD	410	175.256	54.0621	53.1175	42.2051	97.1402	151.814	49.7091	54.0621	273
P55809	Succinyl-CoA:3-ketoacid coenzyme A transferase 1. mitochondrial	OXCT1	455	82.8307	20.0306	12.2754	38.6162	92.2438	124.743	52.4657	52.4657	274
P06753;P06753-5	Tropomyosin alpha-3 chain	TPM3	214	52.2146	52.8101	47.5558	93.5852	29.0163	68.7221	15.171	52.2146	275
A0A0A0MSQ0	Plastin-3	PLS3	532	382.174	5.59501	6.06345	51.7933	16.1375	74.9337	81.8869	51.7933	276
P24298	Alanine aminotransferase 1	GPT	476	14.4059	12.2946	5.72634	121.519	81.954	80.2596	51.5968	51.5968	277
Q6GMV3	Putative peptidyl-tRNA hydrolase PTRHD1	PTRHD1	134	43.5858	17.9385	72.4945	51.569	63.7732	61.9403	11.5685	51.569	278
A2A274	Aconitate hydratase. mitochondrial	ACO2	545	123.347	4.03342	49.8983	31.1024	99.9311	263.537	50.7506	50.7506	279
A0A0A0MSE2	Hydroxyacyl-coenzyme A dehydrogenase. mitochondrial	HADH	192	4.15332	0.344824	50.1792	52.0823	75.2749	142.527	38.1703	50.1792	280
P04080	Cystatin-B	CSTB	39	5.86643	6.18469	49.7992	84.0346	57.8634	62.8582	34.5492	49.7992	281
P16219	Short-chain specific acyl-CoA dehydrogenase. mitochondrial	ACADS	226	3.00962	0.729969	42.7222	48.5032	85.7852	123.523	52.9271	48.5032	282
P20700;Q03252	Lamin-B1;Lamin-B2	LMNB1;LMNB2	47	19.7315	3.05119	47.9853	57.5119	35.5326	114.946	77.7666	47.9853	283
A0A0A0MTS7	Titin	TTN	14498	12.6137	1.1159	57.0135	47.2883	45.0884	128.387	60.9099	47.2883	284
Q15847	Adipogenesis regulatory factor	ADIRF	70	4.41207	46.8585	35.3595	104.53	51.3707	54.7544	10.7058	46.8585	285
P51884	Lumican	LUM	305	32.4676	2.56967	50.2369	161.04	46.8461	83.4043	29.3167	46.8461	286
Q5TD07	Ribosyldihydronicotinamide dehydrogenase [quinone]	NQO2	90	10.8893	184.214	65.251	40.6219	46.4447	166.178	29.5342	46.4447	287
P08237	ATP-dependent 6-phosphofructokinase. muscle type	PFKM	678	125.283	47.976	33.3098	64.5605	12.3835	45.9643	33.2393	45.9643	288
Q04760-2	Lactoylglutathione lyase	GLO1	133	2.43777	0.863655	45.9398	78.2643	28.4025	55.7926	46.3926	45.9398	289
B7Z9I1	Medium-chain specific acyl-CoA dehydrogenase. mitochondrial	ACADM	235	24.5582	0.332122	38.4732	48.5723	86.408	168.128	45.7467	45.7467	290
P30049	ATP synthase subunit delta. mitochondrial	ATP5D	165	57.3521	45.6035	144.326	1.13603	8.0239	89.8187	0.234728	45.6035	291
P02545	Prelamin-A/C;Lamin-A/C	LMNA	270	18.7508	69.4896	33.8737	64.324	45.0815	60.9252	36.4509	45.0815	292
O75746;Q9UJS0	Calcium-binding mitochondrial carrier protein Aralar1;Calcium-binding mitochondrial carrier protein Aralar2	SLC25A12;SLC25A13	406	15.5685	10.9708	44.8242	108.411	114.46	125.988	5.24774	44.8242	293
P13804	Electron transfer flavoprotein subunit alpha. mitochondrial	ETFA	139	44.6194	123.141	2.14847	63.4083	15.0794	88.2732	1.19122	44.6194	294
P08559	Pyruvate dehydrogenase E1 component subunit alpha. somatic form. mitochondrial	PDHA1	244	80.9052	0.987732	62.4389	42.7045	44.2802	107.837	25.8708	44.2802	295
Q9NXA8-4	NAD-dependent protein deacylase sirtuin-5. mitochondrial	SIRT5	95	9.86144	9.53023	44.2639	6.68045	167.543	77.8616	51.5108	44.2639	296
P21912	Succinate dehydrogenase [ubiquinone] iron-sulfur subunit. mitochondrial	SDHB	55	394.027	9.9812	44.0082	25.1864	57.8001	115.536	44.2532	44.2532	297
P49748	Very long-chain specific acyl-CoA dehydrogenase. mitochondrial	ACADVL	298	61.7468	1.30929	43.194	43.9367	96.5723	96.7827	9.92527	43.9367	298
Q12797-4	Aspartyl/asparaginyl beta-hydroxylase	ASPH	86	44.5938	54.7326	38.6851	43.2289	35.0677	44.9204	11.4247	43.2289	299
P06733	Alpha-enolase;Enolase	ENO1	89	42.866	35.9104	38.5351	65.2841	34.6361	115.558	47.9335	42.866	300
P30038	Delta-1-pyrroline-5-carboxylate dehydrogenase. mitochondrial	ALDH4A1	130	1.12006	0.8091	1.65094	71.3697	53.2861	169.124	42.8426	42.8426	301
H0YL11;P48735	Isocitrate dehydrogenase [NADP]. mitochondrial	IDH2	199	80.02	31.0954	86.8419	40.2533	38.2967	99.5469	42.8369	42.8369	302
A0A087WT48	DnaJ homolog subfamily A member 2	DNAJA2	51	6.40763	6.7796	8.5963	41.7862	78.3797	82.1439	92.1816	41.7862	303
Q00325-2	Phosphate carrier protein. mitochondrial	SLC25A3	303	33.4429	21.7231	123.174	41.742	61.2141	14.4851	116.607	41.742	304
P10606	Cytochrome c oxidase subunit 5B. mitochondrial	COX5B	86	57.6851	1.4805	41.2829	6.93897	56.0227	115.566	34.1842	41.2829	305
P00505	Aspartate aminotransferase. mitochondrial	GOT2	122	20.6065	4.97743	19.8351	40.9899	75.3331	195.747	79.8184	40.9899	306
P61956-2	Small ubiquitin-related modifier 2;Small ubiquitin-related modifier 4;Small ubiquitin-related modifier 3	SUMO2;SUMO3;SUMO4	33	44.2616	28.4532	45.0898	104.51	30.1469	15.1186	40.678	40.678	307
P48047	ATP synthase subunit O. mitochondrial	ATP5O	199	169.812	1.01101	40.3122	32.9284	37.0011	86.9824	67.8342	40.3122	308
E7EQR4;P35241	Ezrin;Radixin	EZR;RDX	79	52.2777	10.3117	7.95378	4.01854	39.5029	105.426	56.4758	39.5029	309
P01024	Complement C3;Complement C3 beta chain;C3-beta-c;Complement C3 alpha chain;C3a anaphylatoxin;Acylation stimulating protein;Complement C3b alpha' chain;Complement C3c alpha' chain fragment 1;Complement C3dg fragment;Complement C3g fragment;Complement C3d fragment;Complement C3f fragment;Complement C3c alpha' chain fragment 2	C3	1209	2.53337	7.96334	54.147	75.0201	63.784	39.0473	3.13639	39.0473	310
K7EK07;P68431;Q16695;Q71DI3	Histone H3;Histone H3.3;Histone H3.1;Histone H3.1t;Histone H3.2	H3F3B;H3F3A;HIST1H3A;HIST3H3;HIST2H3A	80	37.1381	1.0286	20.6309	60.7355	66.1024	54.5579	39.0015	39.0015	311
P40939	Trifunctional enzyme subunit alpha. mitochondrial;Long-chain enoyl-CoA hydratase;Long chain 3-hydroxyacyl-CoA dehydrogenase	HADHA	303	69.8219	38.1084	88.9024	12.4313	38.4272	60.0413	17.0786	38.4272	312
Q99497	Protein deglycase DJ-1	PARK7	148	67.7765	2.06858	13.8648	58.7673	38.2256	74.4655	30.9784	38.2256	313
E5RIP7	Inositol monophosphatase 1	IMPA1	44	39.2176	27.9423	10.347	84.1631	37.8331	68.7911	32.63	37.8331	314
P68402	Platelet-activating factor acetylhydrolase IB subunit beta	PAFAH1B2	155	37.7432	89.9874	28.065	35.7788	7.54665	49.0206	48.1729	37.7432	315
O43920	NADH dehydrogenase [ubiquinone] iron-sulfur protein 5	NDUFS5	8	77.1954	15.7756	38.8036	27.0233	59.5405	28.9785	37.6866	37.6866	316
P00441	Superoxide dismutase [Cu-Zn]	SOD1	123	53.7092	14.544	20.1264	28.7974	56.3561	52.519	37.5785	37.5785	317
P11217	Glycogen phosphorylase. muscle form	PYGM	597	53.9047	1.52234	25.8743	37.4595	43.1969	43.2588	26.5873	37.4595	318
C9JEU5	Fibrinogen gamma chain	FGG	239	159.166	41.932	43.3146	27.5761	31.8243	30.7891	37.3497	37.3497	319
K7EKP1	Apolipoprotein C-I;Truncated apolipoprotein C-I	APOC1	47	65.9775	37.307	12.7616	31.2762	61.17	37.8892	22.5067	37.307	320
P53597	Succinyl-CoA ligase [ADP/GDP-forming] subunit alpha. mitochondrial	SUCLG1	192	123.897	22.8899	67.4731	37.1116	56.6552	3.1526	7.68366	37.1116	321
A0A286YFB1;H9KVA2	Troponin T. fast skeletal muscle	TNNT3	206	120.267	27.9202	37.0117	73.2338	54.792	32.1863	0.729292	37.0117	322
P12956	X-ray repair cross-complementing protein 6	XRCC6	461	11.9108	36.2933	17.5858	80.4308	41.7601	74.6156	32.6723	36.2933	323
V9GYG9	Apolipoprotein A-II;Proapolipoprotein A-II;Truncated apolipoprotein A-II	APOA2	77	35.9519	30.0776	30.1318	86.793	39.4722	44.1204	1.08439	35.9519	324
Q9UBQ7	Glyoxylate reductase/hydroxypyruvate reductase	GRHPR	94	35.8246	9.51559	4.52317	65.2553	82.9065	185.697	10.1793	35.8246	325
P31937	3-hydroxyisobutyrate dehydrogenase. mitochondrial	HIBADH	121	35.8168	2.78349	72.2514	107.411	4.98564	122.349	10.8485	35.8168	326
O95139	NADH dehydrogenase [ubiquinone] 1 beta subcomplex subunit 6	NDUFB6	66	132.118	3.9186	35.7249	14.6528	45.1335	87.6721	31.7224	35.7249	327
P11055;P12882;Q9UKX2;Q9Y623	Myosin-3;Myosin-1;Myosin-2;Myosin-4	MYH3;MYH1;MYH2;MYH4	745	27.2516	8.09162	43.1374	20.0835	63.7597	35.4801	58.4944	35.4801	328
P11055;P12882;P12883;P13533;Q9UKX2;Q9UKX3;Q9Y623	Myosin-3;Myosin-1;Myosin-7;Myosin-6;Myosin-2;Myosin-13;Myosin-4	MYH3;MYH1;MYH7;MYH6;MYH2;MYH13;MYH4	1390	74.4726	19.4329	34.4034	75.6453	19.1446	46.1262	35.4569	35.4569	329
P07451	Carbonic anhydrase 3	CA3	131	46.4126	22.9738	25.5783	32.346	35.4269	45.2623	43.6051	35.4269	330
P10768	S-formylglutathione hydrolase	ESD	31	13.0242	6.96583	23.6301	46.7245	38.4889	43.6419	35.1363	35.1363	331
P12882;Q9UKX2	Myosin-1;Myosin-2	MYH1;MYH2	1837	19.3996	30.4861	46.5262	50.9765	28.0898	77.0982	34.7077	34.7077	332
O14958	Calsequestrin-2	CASQ2	40	34.402	21.6053	27.7663	54.1507	49.8765	47.8423	26.8404	34.402	333
P14621	Acylphosphatase-2	ACYP2	85	23.3642	50.6769	27.4872	37.9385	34.402	35.4516	2.59776	34.402	334
P11217	Glycogen phosphorylase. muscle form	PYGM	811	11.4717	1.29773	34.3856	36.2446	21.7158	43.9126	34.4726	34.3856	335
P61081	NEDD8-conjugating enzyme Ubc12	UBE2M	8	8.0367	13.4115	34.1974	59.5609	70.6566	60.8681	26.6636	34.1974	336
P50502	Hsc70-interacting protein;Putative protein FAM10A5;Putative protein FAM10A4	ST13;ST13P5;ST13P4	153	140.985	1.63991	17.087	23.8553	34.1438	76.8295	46.2798	34.1438	337
P49411	Elongation factor Tu. mitochondrial	TUFM	256	49.1713	33.7642	43.2042	35.7635	13.7019	4.64346	0.840739	33.7642	338
P00568	Adenylate kinase isoenzyme 1	AK1	166	11.9226	19.9525	33.7472	41.7004	49.0993	36.2494	31.0931	33.7472	339
P51608	Methyl-CpG-binding protein 2	MECP2	449	58.3013	10.8066	4.16537	33.4189	36.0598	17.993	47.2398	33.4189	340
P36542;P36542-2	ATP synthase subunit gamma. mitochondrial	ATP5C1	49	62.5959	6.36532	33.2587	47.9191	20.4623	34.5867	18.3461	33.2587	341
Q5BKX8	Muscle-related coiled-coil protein	MURC	138	3.4962	22.4352	33.1021	81.8131	60.0901	26.546	35.5493	33.1021	342
P51608	Methyl-CpG-binding protein 2	MECP2	331	33.0772	19.1505	6.71173	57.5703	53.6219	31.5908	51.7335	33.0772	343
A0A0A0MSE2	Hydroxyacyl-coenzyme A dehydrogenase. mitochondrial	HADH	202	16.5814	23.1555	39.0416	32.3786	50.2623	51.6495	19.2231	32.3786	344
P43155-2	Carnitine O-acetyltransferase	CRAT	247	4.09456	4.68878	24.8425	42.5562	32.3656	86.174	39.3416	32.3656	345
P12883;P13533	Myosin-7;Myosin-6	MYH7;MYH6	1919	16.6898	33.4563	56.2846	29.5373	27.8078	31.8027	42.2442	31.8027	346
P06733	Alpha-enolase;Enolase	ENO1	126	94.2135	6.22214	21.0191	62.8819	31.5172	55.6467	9.59296	31.5172	347
Q14324	Myosin-binding protein C. fast-type	MYBPC2	1049	7.94964	35.5444	51.896	58.965	31.0418	1.34959	1.52207	31.0418	348
P21912	Succinate dehydrogenase [ubiquinone] iron-sulfur subunit. mitochondrial	SDHB	233	28.7235	1.67008	53.8158	30.8991	67.8112	47.6111	1.44605	30.8991	349
P53597	Succinyl-CoA ligase [ADP/GDP-forming] subunit alpha. mitochondrial	SUCLG1	57	32.7962	25.9244	30.7719	33.1722	15.9905	34.3402	17.338	30.7719	350
A0A087WT47	Troponin I. slow skeletal muscle	TNNI1	25	30.7148	11.2105	29.8692	37.7403	22.9167	46.6904	36.7072	30.7148	351
Q09666	Neuroblast differentiation-associated protein AHNAK	AHNAK	884	30.4944	24.3814	35.147	45.6623	48.5441	24.1892	11.1271	30.4944	352
P11277-2	Spectrin beta chain. erythrocytic	SPTB	593	11.4067	10.315	28.5037	71.2979	39.83	30.1225	57.6533	30.1225	353
A0A0A0MSE2	Hydroxyacyl-coenzyme A dehydrogenase. mitochondrial	HADH	304	8.84344	0.511804	23.2333	59.6872	35.3259	67.4713	29.9843	29.9843	354
A0A0A0MS07;A0A286YES1	Ig gamma-1 chain C region;Ig gamma-3 chain C region	IGHG1;IGHG3	182	31.3814	29.7321	2.25521	70.0706	72.5716	2.89168	0.949611	29.7321	355
P11277-2	Spectrin beta chain. erythrocytic	SPTB	1905	4.29956	5.34158	14.3639	38.5536	31.8434	63.9912	29.449	29.449	356
O00330-3	Pyruvate dehydrogenase protein X component. mitochondrial	PDHX	179	192.541	16.3953	23.2529	37.0465	107.778	29.2665	3.26066	29.2665	357
P08758	Annexin A5;Annexin	ANXA5	76	12.6119	44.0321	1.49507	45.7101	7.59413	34.6927	29.2629	29.2629	358
P11142;P54652	Heat shock cognate 71 kDa protein;Heat shock-related 70 kDa protein 2	HSPA8;HSPA2	348	32.8796	0.766078	24.8053	42.3141	29.1101	33.2126	22.1096	29.1101	359
O75947	ATP synthase subunit d. mitochondrial	ATP5H	73	3.39747	28.9799	0.444594	0.539725	48.2621	65.5244	72.8278	28.9799	360
O75947	ATP synthase subunit d. mitochondrial	ATP5H	78	3.39747	28.9799	0.161876	0.322754	48.2621	65.5244	72.8278	28.9799	361
P16219	Short-chain specific acyl-CoA dehydrogenase. mitochondrial	ACADS	306	1.13411	1.05474	76.9531	28.8899	78.1395	84.211	10.7329	28.8899	362
Q03252	Lamin-B2	LMNB2	81	27.8578	15.8391	8.48837	43.8288	29.2489	43.3477	28.8147	28.8147	363
Q02218	2-oxoglutarate dehydrogenase. mitochondrial	OGDH	899	8.47421	19.8615	28.6336	31.9264	33.423	74.3859	17.0288	28.6336	364
O00330-3	Pyruvate dehydrogenase protein X component. mitochondrial	PDHX	208	113.493	11.5106	6.83919	3.82118	57.4095	67.3238	28.3534	28.3534	365
P07954-2	Fumarate hydratase. mitochondrial	FH	18	1.60444	10.1987	33.7533	28.3499	41.4578	104.699	2.96031	28.3499	366
P30044-2	Peroxiredoxin-5. mitochondrial	PRDX5	31	21.7145	0.404338	41.0671	27.243	82.3907	46.1807	28.1335	28.1335	367
Q14315-2	Filamin-C	FLNC	776	40.554	0.231366	12.4386	28.1911	21.2382	31.4116	27.8686	27.8686	368
A0A0A0MTS7	Titin	TTN	16036	52.1583	1.93342	21.7194	22.6745	27.7842	69.4732	48.7856	27.7842	369
P20774	Mimecan	OGN	195	62.1184	3.35067	7.95877	32.0967	43.0108	27.6114	23.4035	27.6114	370
P17096	High mobility group protein HMG-I/HMG-Y	HMGA1	15	242.496	11.2905	39.2315	27.3646	9.16487	48.5282	23.5896	27.3646	371
O95810	Serum deprivation-response protein	SDPR	102	16.4418	40.8608	26.3386	61.6977	14.0808	31.4382	11.7107	26.3386	372
Q00765	Receptor expression-enhancing protein 5	REEP5	186	3.35744	1.91355	13.7904	26.3145	43.2602	49.2642	32.9117	26.3145	373
P06733	Alpha-enolase	ENO1	406	28.883	1.93388	10.3453	26.1419	47.1117	30.6666	15.5812	26.1419	374
P63104	14-3-3 protein zeta/delta	YWHAZ	9	20.6742	3.7109	15.7908	40.4322	25.5878	32.9339	27.6273	25.5878	375
P67936;P67936-2	Tropomyosin alpha-4 chain	TPM4	213	3.56155	17.4777	24.9813	145.53	119.571	75.4097	16.6807	24.9813	376
P12882;Q9UKX2;Q9Y623	Myosin-1;Myosin-2;Myosin-4	MYH1;MYH2;MYH4	1733	55.2598	10.7241	0.860355	33.2713	39.2579	24.8854	2.88315	24.8854	377
P40939	Trifunctional enzyme subunit alpha. mitochondrial;Long-chain enoyl-CoA hydratase;Long chain 3-hydroxyacyl-CoA dehydrogenase	HADHA	540	6.57241	10.6508	24.7929	22.7713	36.2747	51.8823	26.008	24.7929	378
C9K0U8	Single-stranded DNA-binding protein. mitochondrial	SSBP1	103	6.94254	5.14103	101.166	60.628	15.6941	180.283	24.7356	24.7356	379
O75208	Ubiquinone biosynthesis protein COQ9. mitochondrial	COQ9	166	11.4136	2.4883	46.7386	0.914331	73.7546	154.935	24.7052	24.7052	380
P35609	Alpha-actinin-2	ACTN2	499	26.4219	0.665475	21.0666	23.0407	26.8407	36.2931	24.4185	24.4185	381
P04406	Glyceraldehyde-3-phosphate dehydrogenase	GAPDH	254	64.3533	2.74916	17.8249	23.9135	20.1968	37.088	36.4165	23.9135	382
F2Z337;P02144	Myoglobin	MB	43	325.335	9.07199	18.6741	28.0906	23.9043	22.8022	24.9324	23.9043	383
P02545	Prelamin-A/C;Lamin-A/C	LMNA	311	34.4349	4.51858	23.6266	23.6148	25.5641	5.04432	5.51821	23.6148	384
P48735	Isocitrate dehydrogenase [NADP]. mitochondrial	IDH2	155	23.6047	4.05784	16.8349	57.3521	59.2733	176.306	8.35556	23.6047	385
P12883	Myosin-7	MYH7	34	51.5487	17.8644	23.5766	14.9196	43.2251	30.1298	10.1956	23.5766	386
P07951;Q5TCU3	Tropomyosin beta chain	TPM2	70	44.2804	23.3778	18.4773	31.8025	19.1108	32.5233	14.6914	23.3778	387
P09104-2;P13929	Gamma-enolase;Enolase;Beta-enolase	ENO2;ENO3	406	50.1985	1.5783	15.9317	23.2872	48.3203	25.4831	9.79992	23.2872	388
P12883;P13533	Myosin-7;Myosin-6	MYH7;MYH6	1444	26.1474	17.5217	19.7974	44.1312	23.2718	31.0253	2.99569	23.2718	389
Q00325-2	Phosphate carrier protein. mitochondrial	SLC25A3	213	192.277	11.0287	11.194	23.2669	41.0082	84.8141	12.7299	23.2669	390
P11142;P54652	Heat shock cognate 71 kDa protein;Heat shock-related 70 kDa protein 2	HSPA8;HSPA2	187	16.2158	1.31535	23.088	80.3354	50.7786	63.3376	16.2506	23.088	391
O00330-3	Pyruvate dehydrogenase protein X component. mitochondrial	PDHX	157	36.4305	3.95364	24.9467	23.0661	29.8058	17.7215	3.97024	23.0661	392
P30084	Enoyl-CoA hydratase. mitochondrial	ECHS1	282	1.41937	0.510351	22.5866	23.0467	71.8041	58.5176	22.828	22.828	393
P23109-2	AMP deaminase 1	AMPD1	52	7.57678	13.1243	22.6704	28.8415	29.8777	31.2343	13.0005	22.6704	394
P16403	Histone H1.2	HIST1H1C	17	11.4315	19.4621	15.1424	38.8824	41.0348	31.829	22.4174	22.4174	395
P07195	L-lactate dehydrogenase B chain	LDHB	308	19.9968	15.5083	15.605	32.3749	76.6735	49.2751	21.8457	21.8457	396
P07585	Decorin	DCN	130	11.7162	30.995	21.5872	36.361	49.8608	17.6517	8.00079	21.5872	397
P07954-2	Fumarate hydratase. mitochondrial	FH	79	44.1223	11.7544	18.6531	10.8269	88.1322	90.8363	21.4264	21.4264	398
P06576	ATP synthase subunit beta. mitochondrial	ATP5B	522	123.785	14.4492	28.1911	20.8616	13.8071	36.4849	11.9848	20.8616	399
P02545	Prelamin-A/C;Lamin-A/C	LMNA	108	9.58678	1.69353	17.2675	37.0083	32.6178	20.5425	35.2558	20.5425	400
P40926	Malate dehydrogenase. mitochondrial;Malate dehydrogenase	MDH2	301	8.66675	5.25981	24.5615	14.937	51.638	56.3432	20.5087	20.5087	401
P40926	Malate dehydrogenase. mitochondrial;Malate dehydrogenase	MDH2	307	8.66675	5.25981	24.5615	14.937	51.638	56.3432	20.5087	20.5087	402
P08237	ATP-dependent 6-phosphofructokinase. muscle type	PFKM	107	17.8148	1.20314	25.9932	20.4569	20.7632	37.9376	0.530786	20.4569	403
E9PPJ3	Smoothelin-like protein 1	SMTNL1	355	2.75957	20.4537	39.7613	42.7493	44.7488	9.35483	9.92178	20.4537	404
P23528;Q9Y281	Cofilin-1;Cofilin-2	CFL1;CFL2	19	8.78018	35.45	26.7559	36.2053	19.892	20.3336	7.09145	20.3336	405
H0YK48;P09493;P09493-6;P09493-9;Q6ZN40	Tropomyosin alpha-1 chain	TPM1	213	20.0885	26.8609	15.9944	30.0654	16.214	79.5362	7.51547	20.0885	406
A0A0A0MTS7	Titin	TTN	14240	73.8657	1.69353	16.5611	24.6138	7.34917	27.5973	19.9184	19.9184	407
Q9Y277	Voltage-dependent anion-selective channel protein 3	VDAC3	163	29.6174	18.3498	10.6522	24.5274	19.8556	40.8172	2.88101	19.8556	408
P13929	Beta-enolase;Enolase	ENO3	126	22.5221	0.280462	12.5639	27.6552	19.7846	22.1155	19.8193	19.8193	409
A0A1B0GWJ0	Adenylosuccinate lyase	ADSL	295	83.9477	12.3041	18.2643	26.1359	19.724	30.2944	10.807	19.724	410
P10412;P16401;P16402;P16403;Q02539	Histone H1.4;Histone H1.5;Histone H1.3;Histone H1.2;Histone H1.1	HIST1H1E;HIST1H1B;HIST1H1D;HIST1H1C;HIST1H1A	106	5.69736	0.483546	12.5025	20.6003	19.4542	23.0215	25.4077	19.4542	411
Q9UHQ9	NADH-cytochrome b5 reductase 1	CYB5R1	124	54.6237	0.635199	19.1242	17.8873	20.0663	27.8258	18.9662	19.1242	412
P02042;P68871	Hemoglobin subunit delta;Hemoglobin subunit beta;LVV-hemorphin-7;Spinorphin	HBD;HBB	145	172.18	5.91826	10.1886	19.1165	53.3802	20.2926	14.7116	19.1165	413
Q8IVN3	Musculoskeletal embryonic nuclear protein 1	MUSTN1;TMEM110-MUSTN1	71	11.4036	3.84902	19.0819	16.4089	20.0035	25.3671	27.4631	19.0819	414
P12882;Q9UKX2	Myosin-1;Myosin-2	MYH1;MYH2	1534	112.444	5.26578	21.0836	23.0217	11.2793	18.791	17.7101	18.791	415
C9JZN9;H9KVA2	Troponin T. fast skeletal muscle	TNNT3	42	98.283	9.09367	18.7708	21.7326	28.9446	10.5035	11.4335	18.7708	416
O60814;P62807;Q16778	Histone H2B type 1-K;Histone H2B type F-S;Histone H2B type 1-C/E/F/G/I;Histone H2B;Histone H2B type 1-L;Histone H2B type 1-N;Histone H2B type 1-H;Histone H2B type 1-D;Histone H2B type 2-E;Histone H2B type 3-B;Histone H2B type 1-O;Putative histone H2B type 2-D;Putative histone H2B type 2-C	HIST1H2BK;H2BFS;HIST1H2BC;HIST1H2BN;HIST1H2BL;HIST1H2BH;HIST1H2BD;HIST2H2BE;HIST3H2BB;HIST1H2BO;HIST2H2BD;HIST2H2BC	21	115.764	16.7068	11.338	18.7414	6.71324	24.4774	20.0039	18.7414	417
O60814;P62807;Q16778	Histone H2B type 1-K;Histone H2B type F-S;Histone H2B type 1-C/E/F/G/I;Histone H2B;Histone H2B type 1-L;Histone H2B type 1-N;Histone H2B type 1-H;Histone H2B type 1-D;Histone H2B type 2-E;Histone H2B type 3-B;Histone H2B type 1-O;Putative histone H2B type 2-D;Putative histone H2B type 2-C	HIST1H2BK;H2BFS;HIST1H2BC;HIST1H2BN;HIST1H2BL;HIST1H2BH;HIST1H2BD;HIST2H2BE;HIST3H2BB;HIST1H2BO;HIST2H2BD;HIST2H2BC	17	115.764	16.7068	11.338	18.7414	6.71324	24.4774	20.0039	18.7414	418
P12883;P13533;Q9UKX3	Myosin-7;Myosin-6;Myosin-13	MYH7;MYH6;MYH13	876	7.01027	1.29198	18.5403	28.1563	13.6178	28.3649	40.9942	18.5403	419
P40926	Malate dehydrogenase. mitochondrial;Malate dehydrogenase	MDH2	185	2.42754	0.599268	29.0937	18.5219	34.8157	38.0564	8.89849	18.5219	420
P11055;P12882;P12883;P13533;Q9UKX2;Q9UKX3;Q9Y623	Myosin-3;Myosin-1;Myosin-7;Putative uncharacterized protein MYH16;Myosin-6;Myosin-2;Myosin-13;Myosin-4	MYH3;MYH1;MYH7;MYH16;MYH6;MYH2;MYH13;MYH4	1374	16.5413	2.64503	14.8644	50.7804	19.6289	27.5697	18.3145	18.3145	421
Q9UKX2	Myosin-2	MYH2	882	17.1452	0.609527	13.1913	18.1514	23.1724	27.6505	21.0546	18.1514	422
A2A274	Aconitate hydratase. mitochondrial	ACO2	748	44.8534	6.86283	12.2081	18.1274	37.6453	34.5623	0.11551	18.1274	423
P11277-2	Spectrin beta chain. erythrocytic	SPTB	355	3.05158	21.8459	23.5939	17.9435	5.48257	31.2225	9.19672	17.9435	424
P12883	Myosin-7	MYH7	1528	46.0218	8.75552	13.9399	18.5423	16.5079	17.7354	22.1669	17.7354	425
P11217	Glycogen phosphorylase. muscle form	PYGM	793	41.3228	1.45995	21.5619	17.7173	9.73105	24.8438	1.12213	17.7173	426
Q00325-2	Phosphate carrier protein. mitochondrial	SLC25A3	208	27.5629	14.158	20.3023	14.1075	9.60742	20.2857	17.6747	17.6747	427
G3V0I5	NADH dehydrogenase [ubiquinone] flavoprotein 1. mitochondrial	NDUFV1	358	17.6056	1.02226	20.9329	35.1201	35.8811	4.01245	4.27217	17.6056	428
P48735	Isocitrate dehydrogenase [NADP]. mitochondrial	IDH2	400	25.257	0.493027	8.53599	7.76569	17.3201	50.3731	26.1258	17.3201	429
Q13423	NAD(P) transhydrogenase. mitochondrial	NNT	55	29.6871	6.92644	2.7333	5.54073	50.6435	88.6072	17.2867	17.2867	430
P13929	Beta-enolase;Enolase	ENO3	89	91.7432	17.1	11.2339	0.301442	0.552873	25.8581	27.7706	17.1	431
C9JRZ6	MICOS complex subunit MIC19	CHCHD3	178	13.8728	21.0512	15.7752	14.1643	16.796	17.6793	28.6112	16.796	432
P62807;Q16778;Q5QNW6	Histone H2B type 1-C/E/F/G/I;Histone H2B;Histone H2B type 1-L;Histone H2B type 1-N;Histone H2B type 1-H;Histone H2B type 1-D;Histone H2B type 1-M;Histone H2B type 1-A;Histone H2B type 2-E;Histone H2B type 3-B;Histone H2B type 1-O;Histone H2B type 1-B;Histone H2B type 2-F	HIST1H2BC;HIST1H2BN;HIST1H2BL;HIST1H2BH;HIST1H2BD;HIST1H2BM;HIST1H2BA;HIST2H2BE;HIST3H2BB;HIST1H2BO;HIST1H2BB;HIST2H2BF	121	168.096	0.749569	13.5038	22.9352	15.9848	16.7712	21.6113	16.7712	433
Q9NPC6	Myozenin-2	MYOZ2	197	7.47115	1.62892	2.29556	29.0334	27.0941	19.925	16.7324	16.7324	434
Q00872-10;Q00872-4	Myosin-binding protein C. slow-type	MYBPC1	456	7.62171	0.185721	5.91069	17.388	16.6366	22.2164	28.5254	16.6366	435
P37837	Transaldolase	TALDO1	321	2.42488	4.63108	16.59	68.6643	10.6404	91.6003	32.3312	16.59	436
P32119	Peroxiredoxin-2	PRDX2	26	12.519	1.65762	14.4115	16.5188	28.7562	40.0636	30.6916	16.5188	437
Q9P2R7-2	Succinyl-CoA ligase [ADP-forming] subunit beta. mitochondrial	SUCLA2	56	16.4618	3.22973	13.4222	7.2758	29.0386	42.5935	16.4347	16.4347	438
A0A0A0MTS7	Titin	TTN	19446	5.41843	1.27869	10.63	16.4092	28.0279	36.5964	20.9287	16.4092	439
P31937	3-hydroxyisobutyrate dehydrogenase. mitochondrial	HIBADH	95	34.3322	16.372	14.6961	9.47904	66.2227	57.576	10.8175	16.372	440
P12883;P13533	Myosin-7;Myosin-6	MYH7;MYH6	1727	16.213	0.442137	5.89319	23.158	23.6662	17.1028	6.74283	16.213	441
P47756	F-actin-capping protein subunit beta	CAPZB	254	2.33273	5.51874	14.6068	16.1304	17.0826	21.829	17.2559	16.1304	442
P07954-2	Fumarate hydratase. mitochondrial	FH	23	92.6055	39.8138	1.71023	33.5044	2.69253	1.01337	16.0698	16.0698	443
P38646	Stress-70 protein. mitochondrial	HSPA9	135	2.72976	25.1472	10.322	14.13	20.423	63.1094	16.0132	16.0132	444
P07195	L-lactate dehydrogenase B chain;L-lactate dehydrogenase	LDHB	82	1.63678	34.703	15.9109	20.3347	2.23437	11.2183	17.5052	15.9109	445
P10412	Histone H1.4	HIST1H1E	17	54.5797	13.6756	9.57398	15.7999	21.2977	23.49	9.22626	15.7999	446
Q53GG5	PDZ and LIM domain protein 3	PDLIM3	169	23.006	22.7363	15.6398	38.5109	0.311931	12.5129	0.409933	15.6398	447
P04075	Fructose-bisphosphate aldolase A;Fructose-bisphosphate aldolase	ALDOA	13	34.9004	12.2753	8.29729	20.5078	15.4984	17.7294	1.23494	15.4984	448
Q13423	NAD(P) transhydrogenase. mitochondrial	NNT	224	6.03853	7.44454	13.1765	15.3864	24.7163	43.0519	25.3341	15.3864	449
P61604	10 kDa heat shock protein. mitochondrial	HSPE1	70	15.3797	10.7821	10.2581	19.2794	22.4503	17.5866	0.813466	15.3797	450
P28838-2	Cytosol aminopeptidase	LAP3	48	12.3913	7.72937	15.3317	22.3172	24.1456	40.069	10.8886	15.3317	451
P12883;P13533	Myosin-7;Myosin-6	MYH7;MYH6	1870	4.5301	26.6	29.1207	31.8094	15.3173	13.4985	3.73699	15.3173	452
P30041	Peroxiredoxin-6	PRDX6	141	7.9238	0.0835741	16.2037	31.5551	26.5109	15.2129	10.4332	15.2129	453
P25705	ATP synthase subunit alpha. mitochondrial	ATP5A1	261	4.69447	37.7244	24.8765	0.231251	12.3374	15.152	15.4671	15.152	454
O00499-6	Myc box-dependent-interacting protein 1	BIN1	180	1.12837	6.06986	28.803	40.935	15.0842	10.6345	26.9902	15.0842	455
A0A087X1N7	Nebulin	NEB	2356	5.96938	10.9304	26.6545	25.8588	3.6746	31.5792	15.0515	15.0515	456
P55084	Trifunctional enzyme subunit beta. mitochondrial;3-ketoacyl-CoA thiolase	HADHB	291	19.973	2.44014	14.801	4.31943	22.7787	39.7442	15.0254	15.0254	457
A0A024R6I7;P01009	Alpha-1-antitrypsin;Short peptide from AAT	SERPINA1	153	9.57845	3.98267	13.7034	21.041	15.0139	21.3582	16.0457	15.0139	458
H0YL11;P48735	Isocitrate dehydrogenase [NADP]. mitochondrial	IDH2	275	35.4071	1.24205	3.49739	1.20304	28.8669	32.9824	14.9694	14.9694	459
P02647	Apolipoprotein A-I;Proapolipoprotein A-I;Truncated apolipoprotein A-I	APOA1	230	18.0515	0.23833	14.3999	14.9918	15.0293	14.8713	12.1425	14.8713	460
P11532-4	Dystrophin	DMD	1053	15.8899	3.57863	15.4156	23.8441	14.8575	14.5762	8.87354	14.8575	461
A0A286YFB1;C9JZN9;H9KVA2	Troponin T. fast skeletal muscle	TNNT3	176	364.703	11.8462	17.9365	14.8104	39.6611	2.58735	8.89269	14.8104	462
S4R371	Fatty acid-binding protein. heart	FABP3	45	14.5796	0.781988	0.435467	26.3523	15.1235	14.7508	22.1808	14.7508	463
O60814;P62807;Q16778	Histone H2B type 1-K;Histone H2B type F-S;Histone H2B type 1-C/E/F/G/I;Histone H2B;Histone H2B type 1-L;Histone H2B type 1-N;Histone H2B type 1-H;Histone H2B type 1-D;Histone H2B type 2-E;Histone H2B type 3-B;Histone H2B type 1-O;Putative histone H2B type 2-D;Putative histone H2B type 2-C	HIST1H2BK;H2BFS;HIST1H2BC;HIST1H2BN;HIST1H2BL;HIST1H2BH;HIST1H2BD;HIST2H2BE;HIST3H2BB;HIST1H2BO;HIST2H2BD;HIST2H2BC	24	12.6928	20.6293	14.6362	22.0178	0.791552	24.4774	0.611794	14.6362	464
P48047	ATP synthase subunit O. mitochondrial	ATP5O	84	32.2844	9.80367	14.5979	11.14	46.4238	22.0778	1.91009	14.5979	465
P68104;Q05639	Elongation factor 1-alpha 1;Putative elongation factor 1-alpha-like 3;Elongation factor 1-alpha 2	EEF1A1;EEF1A1P5;EEF1A2	255	29.0473	0.222424	14.5952	18.0279	27.5383	0.469823	2.99602	14.5952	466
P11217	Glycogen phosphorylase. muscle form	PYGM	29	14.5555	9.27128	13.2776	20.5521	21.3637	26.2604	4.6907	14.5555	467
Q9P2R7-2	Succinyl-CoA ligase [ADP-forming] subunit beta. mitochondrial	SUCLA2	379	1.90445	3.67978	9.26535	14.5312	28.076	26.3143	19.0127	14.5312	468
P05976;P05976-2	Myosin light chain 1/3. skeletal muscle isoform	MYL1	106	11.4879	12.4871	14.4381	36.2154	16.2991	18.1721	6.41407	14.4381	469
P26038	Moesin	MSN	79	14.4026	7.07546	48.4294	50.1254	65.7818	9.68278	4.97448	14.4026	470
P04406	Glyceraldehyde-3-phosphate dehydrogenase	GAPDH	334	12.9697	2.02949	11.1085	24.5633	14.3989	23.05	21.3749	14.3989	471
O75531	Barrier-to-autointegration factor;Barrier-to-autointegration factor. N-terminally processed	BANF1	32	4.23352	2.08077	24.035	17.7831	23.2788	14.3671	6.2697	14.3671	472
P11055;P12882;P12883;P13533;Q9UKX2;Q9UKX3;Q9Y623	Myosin-3;Myosin-1;Myosin-7;Myosin-6;Myosin-2;Myosin-13;Myosin-4	MYH3;MYH1;MYH7;MYH6;MYH2;MYH13;MYH4	1770	8.0145	10.2922	14.2341	45.177	33.3947	27.3046	14.1241	14.2341	473
C9JZN9;H9KVA2	Troponin T. fast skeletal muscle	TNNT3	23	21.3623	14.1525	11.8776	31.311	14.2219	16.0313	5.61823	14.2219	474
P31948	Stress-induced-phosphoprotein 1	STIP1	312	2.73208	3.80257	14.204	14.0917	12.2256	18.7369	16.2302	14.0917	475
P07355	Annexin A2;Annexin;Putative annexin A2-like protein	ANXA2;ANXA2P2	47	14.0747	7.81799	11.0836	26.2615	16.8675	45.9358	4.05735	14.0747	476
P40939	Trifunctional enzyme subunit alpha. mitochondrial;Long-chain enoyl-CoA hydratase;Long chain 3-hydroxyacyl-CoA dehydrogenase	HADHA	413	26.4927	1.08447	39.9034	14.0578	1.41379	71.129	0.997004	14.0578	477
O60662	Kelch-like protein 41	KLHL41	230	7.15548	6.31706	13.9893	18.0723	19.1745	16.9877	8.91107	13.9893	478
E9PNP3	Mth938 domain-containing protein	AAMDC	105	11.3858	1.20992	9.50693	25.8293	23.1063	18.9075	13.9417	13.9417	479
P07585	Decorin	DCN	200	3.91016	11.7455	13.7804	25.8253	14.5416	18.0099	12.4615	13.7804	480
H0YL11;P48735	Isocitrate dehydrogenase [NADP]. mitochondrial	IDH2	256	31.6303	8.18183	13.6932	13.6078	20.2068	33.2822	2.27556	13.6932	481
A0A087WT47	Troponin I. slow skeletal muscle	TNNI1	19	2.87491	13.6548	22.721	29.4037	12.3344	17.3961	5.16967	13.6548	482
Q5QNZ2	ATP synthase F(0) complex subunit B1. mitochondrial	ATP5F1	70	3.33971	4.94686	6.23985	13.5816	27.6614	37.106	18.7655	13.5816	483
Q6NZI2	Polymerase I and transcript release factor	PTRF	165	13.4641	3.1671	1.69034	31.8027	13.5226	22.3095	14.4679	13.5226	484
P11142	Heat shock cognate 71 kDa protein	HSPA8	319	7.01667	4.89361	11.1456	16.8502	14.7926	27.2567	13.2404	13.2404	485
P31415	Calsequestrin-1	CASQ1	113	17.2744	11.135	0.994036	24.168	18.3928	13.1345	7.36659	13.1345	486
Q9UKX2	Myosin-2	MYH2	1246	13.1013	3.86859	5.78287	11.8853	18.7877	36.3822	16.5402	13.1013	487
P54725-2	UV excision repair protein RAD23 homolog A	RAD23A	16	7.33532	8.34386	11.8732	23.0258	38.3361	27.2921	12.6914	12.6914	488
Q9UMS6-5	Synaptopodin-2	SYNPO2	293	10.4655	0.42312	13.3281	12.2621	14.1604	14.3194	12.552	12.552	489
O75323	Protein NipSnap homolog 2	GBAS	143	3.21648	1.15138	24.9793	12.4862	16.4582	32.6332	0.863426	12.4862	490
P00558	Phosphoglycerate kinase 1	PGK1	220	3.22911	1.39627	7.56985	25.2564	14.6689	12.4495	27.8231	12.4495	491
Q13061	Triadin	TRDN	90	5.27934	4.0754	9.41587	13.1585	21.5368	16.484	12.326	12.326	492
P54652	Heat shock-related 70 kDa protein 2	HSPA2	322	13.5608	4.70699	3.45555	12.321	16.8143	12.6592	7.20035	12.321	493
O75380	NADH dehydrogenase [ubiquinone] iron-sulfur protein 6. mitochondrial	NDUFS6	38	74.3597	7.97917	3.42316	12.2845	46.9324	14.7283	2.97452	12.2845	494
A0A0A0MTS7	Titin	TTN	16322	7.79118	13.4151	12.3095	1.06334	5.97921	12.8387	12.2459	12.2459	495
P07954-2	Fumarate hydratase. mitochondrial	FH	57	14.8784	0.694248	8.69022	11.7618	19.9053	16.71	12.1917	12.1917	496
A0A0B4J2D5	ES1 protein homolog. mitochondrial	C21orf33	233	20.7423	0.570928	6.08227	16.1674	12.0291	33.5082	11.5096	12.0291	497
P08758	Annexin A5;Annexin	ANXA5	79	1.98924	4.11589	11.1467	37.1395	11.9587	37.4608	18.1394	11.9587	498
P00558	Phosphoglycerate kinase 1	PGK1	146	11.9379	0.815713	8.48878	16.9262	12.6998	17.6469	9.35129	11.9379	499
P00558	Phosphoglycerate kinase 1	PGK1	191	17.7531	10.8021	6.66001	6.2565	11.9334	15.9547	17.7797	11.9334	500
F2Z337;P02144	Myoglobin	MB	57	32.7745	10.5425	10.5675	22.6444	5.87139	11.9289	14.2527	11.9289	501
P50461	Cysteine and glycine-rich protein 3	CSRP3	132	4.53417	13.347	10.3635	14.5881	11.9203	13.1563	2.24602	11.9203	502
Q6YN16	Hydroxysteroid dehydrogenase-like protein 2	HSDL2	298	6.76988	13.701	0.632321	11.9008	17.7878	20.5477	6.78065	11.9008	503
P50213-2	Isocitrate dehydrogenase [NAD] subunit alpha. mitochondrial	IDH3A	99	11.9004	27.2465	31.926	37.9785	10.3725	10.2506	5.44557	11.9004	504
Q04446	1.4-alpha-glucan-branching enzyme	GBE1	68	25.8482	10.7686	3.95928	11.8825	33.9125	23.8645	4.29612	11.8825	505
P13639	Elongation factor 2	EEF2	308	1.96404	7.85769	6.9572	11.8517	37.9539	25.3571	26.3268	11.8517	506
A0A0A0MSE2	Hydroxyacyl-coenzyme A dehydrogenase. mitochondrial	HADH	192	3.05283	14.2543	21.0777	0.923562	11.7951	12.5238	8.42928	11.7951	507
A0A0A0MSE2	Hydroxyacyl-coenzyme A dehydrogenase. mitochondrial	HADH	202	3.05283	14.2543	21.0777	1.36416	11.7951	12.5238	8.42928	11.7951	508
P30038	Delta-1-pyrroline-5-carboxylate dehydrogenase. mitochondrial	ALDH4A1	99	32.7972	7.44655	5.10918	11.4568	16.0139	28.8378	11.7864	11.7864	509
E9PLK3;P55786-2	Puromycin-sensitive aminopeptidase	NPEPPS	559	4.49223	0.977615	8.662	21.6245	15.8144	32.0936	11.7829	11.7829	510
P60174-1	Triosephosphate isomerase	TPI1	188	28.4984	10.0112	8.63571	13.0827	16.7276	11.6903	6.90708	11.6903	511
P09622	Dihydrolipoyl dehydrogenase. mitochondrial	DLD	66	23.2137	1.37608	60.018	4.61771	9.16931	20.7457	11.6499	11.6499	512
P06733	Alpha-enolase;Enolase	ENO1	92	2.65597	3.64157	6.99679	16.533	17.5643	26.8079	11.6174	11.6174	513
P35573	Glycogen debranching enzyme;4-alpha-glucanotransferase;Amylo-alpha-1.6-glucosidase	AGL	755	14.5288	2.29678	10.6782	18.8984	11.5633	16.0029	7.05555	11.5633	514
J3QS39	Ubiquitin-60S ribosomal protein L40;Ubiquitin;60S ribosomal protein L40;Ubiquitin-40S ribosomal protein S27a;Ubiquitin;40S ribosomal protein S27a;Polyubiquitin-B;Ubiquitin;Polyubiquitin-C;Ubiquitin	UBB;RPS27A;UBC;UBA52	6	5.95285	2.48588	8.75271	14.7864	18.5452	26.163	11.5554	11.5554	515
P13929	Beta-enolase	ENO3	334	48.2101	0.324029	11.4603	15.7635	9.86947	14.4261	10.8889	11.4603	516
P00505	Aspartate aminotransferase. mitochondrial	GOT2	302	4.29436	2.84151	11.4372	13.5156	9.99154	40.7713	19.4518	11.4372	517
P16219	Short-chain specific acyl-CoA dehydrogenase. mitochondrial	ACADS	262	6.66446	11.4221	11.8142	4.80868	32.4179	48.0023	0.982517	11.4221	518
P12882;Q9UKX2;Q9UKX3;Q9Y623	Myosin-1;Myosin-2;Myosin-13;Myosin-4	MYH1;MYH2;MYH13;MYH4	725	26.3119	0.386017	6.06399	13.6713	11.2536	13.0869	7.85298	11.2536	519
P15259	Phosphoglycerate mutase 2	PGAM2	129	120.688	9.90382	11.1638	10.0113	33.1865	11.2611	7.68038	11.1638	520
P21796	Voltage-dependent anion-selective channel protein 1	VDAC1	252	4.05442	11.1555	3.09502	33.355	21.484	11.8376	8.09444	11.1555	521
O60814;P62807;Q16778	Histone H2B type 1-K;Histone H2B type F-S;Histone H2B type 1-C/E/F/G/I;Histone H2B type 2-E	HIST1H2BK;H2BFS;HIST1H2BC;HIST2H2BE	6	36.7907	15.5446	5.86342	27.5223	2.80289	11.1208	4.48337	11.1208	522
P08237	ATP-dependent 6-phosphofructokinase. muscle type	PFKM	372	14.0491	1.06118	7.70169	12.2048	11.0799	14.6147	10.5464	11.0799	523
P49411	Elongation factor Tu. mitochondrial	TUFM	88	11.0549	0.85126	21.4748	24.2327	33.0611	0.889107	0.267831	11.0549	524
P16219	Short-chain specific acyl-CoA dehydrogenase. mitochondrial	ACADS	72	13.8688	5.21575	10.9942	3.75304	33.9471	35.5879	10.6147	10.9942	525
P13929	Beta-enolase;Enolase	ENO3	5	6.2961	10.919	9.30973	14.6573	11.8342	12.0104	5.91446	10.919	526
P08559	Pyruvate dehydrogenase E1 component subunit alpha. somatic form. mitochondrial	PDHA1	39	7.7494	6.92862	10.8734	14.5385	19.7877	57.2134	5.18687	10.8734	527
P08133	Annexin A6;Annexin	ANXA6	620	6.31042	7.43733	13.1059	29.4393	5.4019	16.6161	10.8435	10.8435	528
P02511	Alpha-crystallin B chain	CRYAB	166	43.2865	1.4274	0.321891	0.622729	10.8431	24.2603	15.5031	10.8431	529
Q9P0L0	Vesicle-associated membrane protein-associated protein A	VAPA	211	23.7668	10.7468	5.21731	12.6356	9.52602	16.9113	1.66087	10.7468	530
P30048-2	Thioredoxin-dependent peroxide reductase. mitochondrial	PRDX3	65	10.7155	13.4206	9.70124	0.86482	42.567	18.7535	0.297899	10.7155	531
P00338	L-lactate dehydrogenase A chain	LDHA	126	15.8255	0.255189	4.75339	12.3985	5.35315	12.3442	10.6912	10.6912	532
Q15149-7	Plectin	PLEC	2105	15.4936	4.2309	2.87029	16.7918	9.76987	19.624	10.5723	10.5723	533
J3KN67;P06753;P09493;P09493-4;P09493-9;Q6ZN40	Tropomyosin alpha-3 chain;Tropomyosin alpha-1 chain	TPM3;TPM1	71	36.4218	6.5957	7.5792	16.691	10.5715	12.2953	5.68914	10.5715	534
E9PLK3;P55786-2	Puromycin-sensitive aminopeptidase;Puromycin-sensitive aminopeptidase-like protein	NPEPPS;NPEPPSL1	159	3.28484	1.01242	8.07169	19.2593	11.8882	22.4655	10.4595	10.4595	535
P00918	Carbonic anhydrase 2	CA2	167	4.852	1.6394	9.19408	27.2375	18.6022	31.9922	10.4421	10.4421	536
P07305-2	Histone H1.0;Histone H1.0. N-terminally processed	H1F0	35	6.46087	3.87778	12.5021	22.9233	10.3715	16.7201	3.95835	10.3715	537
P10809	60 kDa heat shock protein. mitochondrial	HSPD1	359	20.8663	6.4639	5.84209	10.3631	16.6921	31.2679	7.04982	10.3631	538
P40926	Malate dehydrogenase. mitochondrial;Malate dehydrogenase	MDH2	329	0.288719	10.3599	22.5147	9.27589	0.244977	57.3317	23.8129	10.3599	539
P04075	Fructose-bisphosphate aldolase A;Fructose-bisphosphate aldolase	ALDOA	99	43.9335	10.3133	9.70443	11.8411	32.4728	9.91121	3.21083	10.3133	540
P21817-3	Ryanodine receptor 1	RYR1	2922	2.34385	12.3283	7.57896	10.251	33.6299	42.611	8.80586	10.251	541
Q8N142	Adenylosuccinate synthetase isozyme 1	ADSSL1	380	10.6892	15.8816	10.2092	10.9613	7.18448	2.94861	3.13172	10.2092	542
P36957	Dihydrolipoyllysine-residue succinyltransferase component of 2-oxoglutarate dehydrogenase complex. mitochondrial	DLST	353	1.76594	10.1394	13.4233	4.19889	11.0203	12.3978	5.23984	10.1394	543
P60903	Protein S100-A10	S100A10	23	19.3594	10.5206	5.2822	12.503	10.0687	4.36424	4.60394	10.0687	544
Q6NZI2	Polymerase I and transcript release factor	PTRF	326	18.4577	1.22777	3.14342	10.3841	14.2913	9.97806	1.19279	9.97806	545
P10809	60 kDa heat shock protein. mitochondrial	HSPD1	417	18.9755	2.61465	9.85164	13.2524	8.52367	28.8411	9.9733	9.9733	546
P14854	Cytochrome c oxidase subunit 6B1	COX6B1	13	13.4152	0.16721	6.36239	12.9448	9.89408	10.3073	7.69463	9.89408	547
P06732	Creatine kinase M-type;Creatine kinase M-type. N-terminally processed	CKM	9	25.9134	4.58898	5.48148	9.77565	22.828	13.7583	4.52723	9.77565	548
P55084	Trifunctional enzyme subunit beta. mitochondrial;3-ketoacyl-CoA thiolase	HADHB	72	61.3941	0.18644	5.56209	9.59068	23.1015	22.5358	6.42912	9.59068	549
P00915	Carbonic anhydrase 1	CA1	157	64.9794	0.837812	9.58381	32.5397	7.87945	22.4195	2.87675	9.58381	550
P52179	Myomesin-1	MYOM1	1078	1.61078	2.56696	28.8195	48.0157	2.47246	26.6636	9.57077	9.57077	551
P40939	Trifunctional enzyme subunit alpha. mitochondrial;Long-chain enoyl-CoA hydratase;Long chain 3-hydroxyacyl-CoA dehydrogenase	HADHA	406	6.4468	3.09147	24.0594	6.35355	9.56695	44.874	9.79634	9.56695	552
P40939	Trifunctional enzyme subunit alpha. mitochondrial;Long-chain enoyl-CoA hydratase;Long chain 3-hydroxyacyl-CoA dehydrogenase	HADHA	411	6.4468	3.09147	24.0594	6.35355	9.56695	44.874	9.79634	9.56695	553
P12883	Myosin-7	MYH7	1305	18.972	1.80214	5.13351	9.48564	9.7977	16.5123	2.40571	9.48564	554
Q9P2R7-2	Succinyl-CoA ligase [ADP-forming] subunit beta. mitochondrial	SUCLA2	193	0.974875	9.48031	12.2268	6.38681	27.9156	24.3073	2.93444	9.48031	555
Q562R1	Beta-actin-like protein 2	ACTBL2	327	7.84639	0.248348	14.5551	109.451	9.42309	12.646	7.74583	9.42309	556
Q13423	NAD(P) transhydrogenase. mitochondrial	NNT	397	2.36403	12.2537	9.40839	3.17202	18.0926	23.436	6.97274	9.40839	557
Q9UHQ9	NADH-cytochrome b5 reductase 1	CYB5R1	54	9.35996	0.883543	2.22808	16.369	10.0644	9.77234	2.19028	9.35996	558
Q14315-2	Filamin-C	FLNC	1798	20.6214	3.49763	3.63194	12.4698	9.34871	12.6495	7.59726	9.34871	559
P01008	Antithrombin-III	SERPINC1	260	8.27573	22.0408	18.0762	17.4141	1.61628	9.21263	6.74083	9.21263	560
P51884	Lumican	LUM	181	3.59266	1.72678	9.03903	34.3044	10.2195	12.4026	6.57788	9.03903	561
P14618;P14618-2	Pyruvate kinase PKM;Pyruvate kinase	PKM	135	11.5206	0.966511	6.82755	10.1625	5.20649	8.84	9.9561	8.84	562
P36871;P36871-2	Phosphoglucomutase-1	PGM1	234	62.6092	9.27071	5.94637	16.8591	8.16385	8.77039	7.19806	8.77039	563
P40926	Malate dehydrogenase. mitochondrial;Malate dehydrogenase	MDH2	297	8.96487	5.45147	8.74272	6.2138	12.0311	26.1947	1.86857	8.74272	564
P52179	Myomesin-1	MYOM1	610	4.31939	9.28091	2.02912	11.2631	15.1531	6.75135	8.7408	8.7408	565
S4R371	Fatty acid-binding protein. heart	FABP3	53	13.0423	0.401111	0.475897	0.623309	11.2156	10.2614	8.69902	8.69902	566
P12883;P13533	Myosin-7;Myosin-6	MYH7;MYH6	918	15.9746	0.0590183	0.07414	9.8749	8.67762	6.84112	16.654	8.67762	567
E9PLK3;P55786-2	Puromycin-sensitive aminopeptidase;Puromycin-sensitive aminopeptidase-like protein	NPEPPS;NPEPPSL1	275	8.65641	0.512657	2.6538	10.04	17.3498	25.4609	6.12008	8.65641	568
P08559	Pyruvate dehydrogenase E1 component subunit alpha. somatic form. mitochondrial	PDHA1	63	26.3946	9.44655	8.59264	6.79784	4.43023	11.334	2.46741	8.59264	569
O95182	NADH dehydrogenase [ubiquinone] 1 alpha subcomplex subunit 7	NDUFA7	92	7.51116	9.03183	12.9346	8.54498	6.2928	11.3935	5.33084	8.54498	570
A0A0A0MTS7	Titin	TTN	14245	18.994	5.56741	6.09516	8.50383	2.50321	17.0383	21.9391	8.50383	571
A0A0G2JIW1;P17066	Heat shock 70 kDa protein 1B;Heat shock 70 kDa protein 1A;Heat shock 70 kDa protein 6;Putative heat shock 70 kDa protein 7	HSPA1B;HSPA1A;HSPA6;HSPA7	320	0.32884	0.437601	2.30104	8.77439	12.3228	8.46637	10.4706	8.46637	572
F2Z337;P02144	Myoglobin	MB	63	84.3461	8.46116	11.6388	14.6186	2.18105	7.79076	7.14597	8.46116	573
P61981	14-3-3 protein gamma;14-3-3 protein gamma. N-terminally processed	YWHAG	10	0.983411	1.31522	7.22267	8.42461	20.7157	12.1299	9.57684	8.42461	574
V9GYG0	ADP/ATP translocase 1	SLC25A4	166	2.45485	8.91788	9.22684	8.40376	6.3586	15.665	4.33446	8.40376	575
A0A0A0MTS7	Titin	TTN	24967	7.45923	3.01836	12.3114	10.4592	8.37011	15.4785	2.54212	8.37011	576
P48735	Isocitrate dehydrogenase [NADP]. mitochondrial	IDH2	180	176.327	1.29899	5.74994	11.9335	12.7592	8.30557	2.80088	8.30557	577
A0A0A0MTS7	Titin	TTN	20266	1.80717	3.98767	7.15723	8.30558	8.28578	13.9186	10.3547	8.28578	578
P40926	Malate dehydrogenase. mitochondrial;Malate dehydrogenase	MDH2	296	22.9978	3.73724	5.99417	8.27511	10.5192	22.5702	1.37864	8.27511	579
A0A0A0MSE2	Hydroxyacyl-coenzyme A dehydrogenase. mitochondrial	HADH	315	12.6019	1.83986	8.20868	6.82831	9.89836	21.8366	5.92641	8.20868	580
P02545	Prelamin-A/C;Lamin-A/C	LMNA	171	8.19695	6.03835	2.04769	8.43086	11.4412	10.9676	1.83976	8.19695	581
Q09666	Neuroblast differentiation-associated protein AHNAK	AHNAK	438	7.20797	20.315	11.72	9.8648	8.09516	4.2147	5.79372	8.09516	582
K7EQW8		TPM4	26	174.866	19.2358	0.179188	7.46771	35.9921	4.34995	8.07063	8.07063	583
E7EPT4	NADH dehydrogenase [ubiquinone] flavoprotein 2. mitochondrial	NDUFV2	157	3.40399	3.0519	8.0137	9.63626	20.6179	22.6328	8.05682	8.05682	584
P13929	Beta-enolase;Enolase	ENO3	281	2.21983	6.61673	7.92317	15.4039	14.7128	11.0918	7.12869	7.92317	585
P49748	Very long-chain specific acyl-CoA dehydrogenase. mitochondrial	ACADVL	276	0.701379	2.06254	10.2844	7.90436	4.55311	31.8569	8.15282	7.90436	586
C9J8T6	Cytochrome c oxidase copper chaperone	COX17	17	3.00233	7.69036	1.29956	12.0029	16.252	10.0381	3.44029	7.69036	587
P13639	Elongation factor 2	EEF2	498	0.993182	1.29328	1.8039	11.0253	18.3533	10.2236	7.54119	7.54119	588
P05976;P05976-2	Myosin light chain 1/3. skeletal muscle isoform	MYL1	69	2.07374	1.25553	20.0945	13.9562	19.6322	7.51348	4.92934	7.51348	589
P30041	Peroxiredoxin-6	PRDX6	144	3.45069	0.245807	7.49478	17.7579	7.72162	12.2618	6.89459	7.49478	590
P12882;P12883;P13533;Q9UKX2;Q9UKX3;Q9Y623	Myosin-1;Myosin-7;Myosin-6;Myosin-2;Myosin-13;Myosin-4	MYH1;MYH7;MYH6;MYH2;MYH13;MYH4	657	7.4664	0.177502	3.65961	13.018	12.0543	14.4498	7.27725	7.4664	591
Q08043	Alpha-actinin-3	ACTN3	412	59.1907	0.588893	2.80377	7.45159	24.3694	50.194	1.08707	7.45159	592
P25705	ATP synthase subunit alpha. mitochondrial	ATP5A1	239	26.9446	5.84066	11.5315	4.68074	3.75247	10.8141	7.37267	7.37267	593
A0A0G2JIW1	Heat shock 70 kDa protein 1B;Heat shock 70 kDa protein 1A	HSPA1B;HSPA1A	72	3.15004	8.83937	7.35633	13.3163	14.9775	7.11525	6.98434	7.35633	594
P02545	Prelamin-A/C;Lamin-A/C	LMNA	265	10.7887	1.0798	3.75548	7.30227	7.06613	8.85515	14.0151	7.30227	595
P21796	Voltage-dependent anion-selective channel protein 1	VDAC1	224	14.5633	18.7552	1.38914	1.09641	7.30193	10.4504	5.45031	7.30193	596
Q9Y623	Myosin-4	MYH4	1046	33.1348	5.01736	3.04641	7.28436	13.6551	9.9299	6.71043	7.28436	597
E9PN17	ATP synthase subunit g. mitochondrial;ATP synthase subunit g 2. mitochondrial	ATP5L;ATP5L2	54	7.2253	3.00762	1.61426	2.87157	62.1529	120.486	17.9774	7.2253	598
E9PN17	ATP synthase subunit g. mitochondrial;ATP synthase subunit g 2. mitochondrial	ATP5L;ATP5L2	55	7.2253	2.22143	3.54392	2.42076	62.1529	120.486	17.9774	7.2253	599
P13805-2	Troponin T. slow skeletal muscle	TNNT1	216	4.00641	0.053833	1.94028	7.19308	13.2858	14.6567	10.5968	7.19308	600
A0A0U1RRL8	Spermatogenesis-associated protein 20	SPATA20	537	10.9434	6.34817	7.18974	2.99045	13.9427	79.0976	4.59581	7.18974	601
A2A274	Aconitate hydratase. mitochondrial	ACO2	764	103.951	0.245414	20.2984	7.11982	0.687172	9.07259	0.151588	7.11982	602
A0A087X1N7	Nebulin	NEB	2370	0.338415	0.943957	7.20392	21.8038	1.67721	7.10387	20.8406	7.10387	603
P40939	Trifunctional enzyme subunit alpha. mitochondrial;Long-chain enoyl-CoA hydratase;Long chain 3-hydroxyacyl-CoA dehydrogenase	HADHA	531	1.08249	2.71664	7.2724	1.55977	13.5532	7.01793	8.75602	7.01793	604
P40939	Trifunctional enzyme subunit alpha. mitochondrial;Long-chain enoyl-CoA hydratase;Long chain 3-hydroxyacyl-CoA dehydrogenase	HADHA	519	1.08249	2.71664	7.2724	0.77732	13.5532	7.01793	8.75602	7.01793	605
P40926	Malate dehydrogenase. mitochondrial;Malate dehydrogenase	MDH2	307	6.98451	4.43996	0.253159	8.7979	11.3923	13.9375	1.8116	6.98451	606
A0A0C4DFM5	Myotilin	MYOT	184	11.2753	4.25621	3.17787	8.84079	5.80345	9.14612	6.96403	6.96403	607
S4R371	Fatty acid-binding protein. heart	FABP3	59	11.505	1.79343	2.57031	8.10426	7.27582	6.94155	3.23129	6.94155	608
P18206-2	Vinculin	VCL	646	3.94845	9.34653	6.89706	10.733	6.58509	10.8122	4.20835	6.89706	609
Q06830	Peroxiredoxin-1	PRDX1	35	8.58576	1.04165	3.49012	12.8418	2.23778	10.1952	6.86965	6.86965	610
P13929	Beta-enolase;Enolase	ENO3	80	6.83577	1.19809	49.5198	2.28985	0.0467815	78.2549	50.1358	6.83577	611
P54296	Myomesin-2	MYOM2	735	1.11271	6.2938	11.0871	13.3474	9.07868	3.70013	6.83494	6.83494	612
A0A0A0MTS7	Titin	TTN	21956	48.6911	1.26639	6.8328	6.63871	2.33712	8.9816	10.4313	6.8328	613
P12883	Myosin-7	MYH7	43	6.8023	3.30197	5.17594	8.15097	5.22818	9.66275	7.10259	6.8023	614
P11142;P54652	Heat shock cognate 71 kDa protein;Heat shock-related 70 kDa protein 2	HSPA8;HSPA2	507	8.26567	10.3413	4.29335	15.9444	2.86279	6.75284	1.34975	6.75284	615
P55084	Trifunctional enzyme subunit beta. mitochondrial;3-ketoacyl-CoA thiolase	HADHB	188	0.397153	1.50134	5.25228	6.75262	9.50605	27.6518	15.0615	6.75262	616
A0A0A0MTS7	Titin	TTN	23191	7.89776	2.20042	6.07316	6.74029	5.4323	20.638	12.1748	6.74029	617
O14983-2	Sarcoplasmic/endoplasmic reticulum calcium ATPase 1	ATP2A1	544	6.73513	12.9711	5.24351	16.7921	4.41818	17.9646	0.409238	6.73513	618
P49773	Histidine triad nucleotide-binding protein 1	HINT1	21	6.72939	2.12742	11.8353	18.9686	13.9499	2.27326	2.35572	6.72939	619
P32119	Peroxiredoxin-2	PRDX2	29	58.5179	6.27268	6.70463	5.48514	10.087	12.1724	0.691278	6.70463	620
P61981	14-3-3 protein gamma;14-3-3 protein gamma. N-terminally processed	YWHAG	142	2.61971	0.209624	6.70034	8.2469	2.08769	13.2536	11.013	6.70034	621
P06732	Creatine kinase M-type;Creatine kinase M-type. N-terminally processed	CKM	40	2.78514	4.45532	6.66666	15.799	47.6065	20.2623	1.29253	6.66666	622
Q08043	Alpha-actinin-3	ACTN3	849	1.33925	6.65641	5.44061	8.11691	13.2649	31.9759	0.739349	6.65641	623
P51884	Lumican	LUM	226	1.83013	8.85503	6.59089	16.8568	19.5147	4.88698	3.88333	6.59089	624
P12882;P12883;P13533;Q9UKX2;Q9UKX3;Q9Y623	Myosin-1;Myosin-7;Myosin-6;Myosin-2;Myosin-13;Myosin-4	MYH1;MYH7;MYH6;MYH2;MYH13;MYH4	1173	16.9306	3.70954	6.57669	13.6955	4.73421	9.63946	6.56334	6.57669	625
E7EPT4	NADH dehydrogenase [ubiquinone] flavoprotein 2. mitochondrial	NDUFV2	64	46.9672	0.939789	0.752594	8.92502	6.56832	16.6917	0.377981	6.56832	626
P60174-1	Triosephosphate isomerase	TPI1	142	2.28819	0.593117	2.92863	8.60587	6.54768	11.6903	7.38795	6.54768	627
P02794	Ferritin heavy chain;Ferritin heavy chain. N-terminally processed;Ferritin	FTH1	72	6.49619	6.70376	4.91687	7.24181	8.02256	4.83884	2.43611	6.49619	628
P60903	Protein S100-A10	S100A10	54	2.08816	14.6766	2.24303	16.2094	7.03359	6.4791	2.65866	6.4791	629
P22695	Cytochrome b-c1 complex subunit 2. mitochondrial	UQCRC2	98	3.89293	9.1619	7.66967	5.70467	6.40135	13.3138	3.59329	6.40135	630
P68366-2	Tubulin alpha-4A chain	TUBA4A	321	0.750166	0.445418	4.09977	9.51059	8.6801	12.4408	6.37113	6.37113	631
P52179	Myomesin-1	MYOM1	997	1.40168	6.35515	1.38881	9.66616	13.6425	13.7119	4.09309	6.35515	632
P52179	Myomesin-1	MYOM1	693	3.74512	1.44957	5.03747	17.2758	10.479	6.3522	9.46483	6.3522	633
P54296	Myomesin-2	MYOM2	1341	6.2549	0.784344	0.188336	12.6421	5.55942	7.02634	6.64716	6.2549	634
Q16698-2	2.4-dienoyl-CoA reductase. mitochondrial	DECR1	251	0.180036	2.74281	6.28113	6.24357	18.548	23.3677	3.67866	6.24357	635
A0A087WXS0	Troponin I. fast skeletal muscle	TNNI2	168	24.2067	3.93848	7.37896	9.43293	5.62909	6.21208	6.2401	6.2401	636
P06732	Creatine kinase M-type;Creatine kinase M-type. N-terminally processed	CKM	242	34.7727	1.31432	4.15802	6.31961	2.91129	9.17222	6.22578	6.22578	637
A2A274	Aconitate hydratase. mitochondrial	ACO2	714	0.54906	6.20063	6.68541	4.67276	10.5407	17.8092	0.15753	6.20063	638
Q13228	Selenium-binding protein 1	SELENBP1	437	18.1624	1.1957	6.17594	12.9078	8.57732	3.5752	0.530716	6.17594	639
F8W914	Reticulon;Reticulon-4	RTN4	332	20.2487	8.49223	6.12153	18.4968	2.43639	5.24113	3.9468	6.12153	640
Q14324	Myosin-binding protein C. fast-type	MYBPC2	309	2.63854	7.89518	6.96558	5.29832	6.10682	5.07677	6.75081	6.10682	641
P08670	Vimentin	VIM	294	1.40845	0.615684	6.09823	9.37572	6.32451	7.28312	2.23976	6.09823	642
O60662	Kelch-like protein 41	KLHL41	38	6.0963	7.7054	5.24572	10.874	1.97518	7.57346	0.29091	6.0963	643
P09382	Galectin-1	LGALS1	108	7.56695	4.03551	6.05573	0.289004	17.5564	7.11702	0.419	6.05573	644
P00558	Phosphoglycerate kinase 1	PGK1	361	4.12375	0.37972	6.05042	8.6758	5.99971	15.8339	8.4148	6.05042	645
P11217	Glycogen phosphorylase. muscle form	PYGM	465	11.2743	6.02696	4.2216	6.50986	5.55221	8.49921	4.40764	6.02696	646
P09622	Dihydrolipoyl dehydrogenase. mitochondrial;Dihydrolipoyl dehydrogenase	DLD	267	5.93903	0.652572	7.68969	1.60769	5.99146	14.5508	6.43537	5.99146	647
P09622	Dihydrolipoyl dehydrogenase. mitochondrial;Dihydrolipoyl dehydrogenase	DLD	271	5.93903	0.654583	7.68969	2.89521	5.99146	14.5508	6.43537	5.99146	648
P09622	Dihydrolipoyl dehydrogenase. mitochondrial;Dihydrolipoyl dehydrogenase	DLD	273	3.97139	1.20336	3.84805	5.9214	7.59454	23.8013	10.2679	5.9214	649
P09622	Dihydrolipoyl dehydrogenase. mitochondrial;Dihydrolipoyl dehydrogenase	DLD	277	3.97139	0.968089	3.84805	5.9214	7.59454	23.8013	10.2679	5.9214	650
B4DJV2	Citrate synthase;Citrate synthase. mitochondrial	CS	446	5.26223	2.40414	12.5793	5.90926	19	35.7968	4.89094	5.90926	651
P09622	Dihydrolipoyl dehydrogenase. mitochondrial;Dihydrolipoyl dehydrogenase	DLD	417	178.331	1.02018	2.67594	5.90121	8.39737	15.706	2.73451	5.90121	652
Q00688	Peptidyl-prolyl cis-trans isomerase FKBP3	FKBP3	165	0.890461	0.396749	0.875983	9.9468	6.30628	5.87776	6.11836	5.87776	653
A0A0A0MTS7	Titin	TTN	19330	14.1745	0.874659	5.39307	3.55557	5.84492	11.9322	9.1372	5.84492	654
P00558	Phosphoglycerate kinase 1	PGK1	48	2.06887	0.08481	5.84115	21.0913	5.16715	27.6791	6.75899	5.84115	655
P22695	Cytochrome b-c1 complex subunit 2. mitochondrial	UQCRC2	359	6.5718	0.157138	5.82491	4.52845	14.2686	7.08927	3.94968	5.82491	656
P12882;Q9UKX2;Q9Y623	Myosin-1;Myosin-2;Myosin-4	MYH1;MYH2;MYH4	924	5.81875	0.171682	3.67759	16.876	16.264	6.47604	2.23824	5.81875	657
P49748	Very long-chain specific acyl-CoA dehydrogenase. mitochondrial	ACADVL	239	8.05985	3.0073	5.7773	6.79521	0.990313	10.0164	1.63134	5.7773	658
P13929	Beta-enolase	ENO3	420	0.252938	7.40638	5.7443	16.6208	18.5053	4.93346	2.35795	5.7443	659
P00558	Phosphoglycerate kinase 1	PGK1	291	5.60551	1.58027	5.71378	9.48223	9.31674	8.59381	5.17103	5.71378	660
A0A0A0MTS7	Titin	TTN	25045	14.1757	8.05407	5.62099	4.0559	2.97162	13.4387	1.51242	5.62099	661
A0A0J9YXN7;Q96Q06-2	Perilipin-4	PLIN4	1289	1.84962	10.924	6.48523	9.04984	1.77376	5.59522	1.78097	5.59522	662
A0A0A0MTS7	Titin	TTN	30192	4.9787	1.13655	5.54104	11.0065	2.71611	30.957	24.1041	5.54104	663
P04792	Heat shock protein beta-1	HSPB1	112	8.81734	0.134775	3.03387	2.5567	19.746	13.0604	5.5348	5.5348	664
P40926	Malate dehydrogenase. mitochondrial;Malate dehydrogenase	MDH2	239	17.1844	1.2138	1.43901	11.3372	1.93776	17.9573	5.50317	5.50317	665
O14983-2	Sarcoplasmic/endoplasmic reticulum calcium ATPase 1	ATP2A1	511	0.979921	5.60912	5.47316	8.59872	4.41639	5.43997	3.71489	5.43997	666
Q9UKX2	Myosin-2	MYH2	1266	7.00811	2.68102	0.333882	5.98884	9.4066	5.41368	2.18133	5.41368	667
P40926	Malate dehydrogenase. mitochondrial;Malate dehydrogenase	MDH2	328	0.519238	1.90588	17.6901	5.36239	6.50533	12.669	4.77397	5.36239	668
P40926	Malate dehydrogenase. mitochondrial;Malate dehydrogenase	MDH2	324	0.519238	1.90588	17.6901	5.36239	6.50533	12.669	4.77397	5.36239	669
Q9UIJ7	GTP:AMP phosphotransferase AK3. mitochondrial	AK3	189	175.501	5.24511	7.40994	0.956645	22.6845	5.35316	2.80545	5.35316	670
P12882;Q9UKX2	Myosin-1;Myosin-2	MYH1;MYH2	1450	25.0836	2.29763	5.23976	9.96315	2.13656	7.67297	0.0379588	5.23976	671
A2A274	Aconitate hydratase. mitochondrial	ACO2	755	1.87584	3.82272	5.18361	10.2113	5.40723	13.5849	0.6714	5.18361	672
Q96HC4-2;Q96HC4-3	PDZ and LIM domain protein 5	PDLIM5	195	62.1098	1.49788	0.884101	6.79871	12.2048	5.13263	0.938662	5.13263	673
A0A0A0MTS7	Titin	TTN	10082	5.12692	0.931908	1.88243	5.54718	9.17816	7.20199	3.97634	5.12692	674
P12883	Myosin-7	MYH7	1316	5.10172	1.73147	0.254336	4.86198	15.7669	7.09417	5.34985	5.10172	675
P49411	Elongation factor Tu. mitochondrial	TUFM	418	0.502153	0.217019	8.40775	2.90297	8.4599	28.1883	5.07605	5.07605	676
Q99497	Protein deglycase DJ-1	PARK7	182	1.41506	2.34045	5.07342	9.46807	12.6221	11.1698	3.11729	5.07342	677
P40925	Malate dehydrogenase. cytoplasmic;Malate dehydrogenase	MDH1	118	11.9157	8.23955	4.78539	8.53788	4.26188	5.00313	3.2151	5.00313	678
P17174	Aspartate aminotransferase. cytoplasmic	GOT1	97	4.98477	2.5704	3.22804	7.61743	6.44967	6.81994	4.71416	4.98477	679
A0A0A0MTS7	Titin	TTN	16690	3.19492	4.3957	8.61828	4.8871	3.37966	15.5985	6.32553	4.8871	680
P38646	Stress-70 protein. mitochondrial	HSPA9	600	7.29074	2.64427	5.31777	2.53809	4.88312	17.6638	1.58351	4.88312	681
A0A0A0MTS7	Titin	TTN	33094	2.79749	7.04397	4.64117	3.69953	11.4281	6.41193	4.88246	4.88246	682
P55072	Transitional endoplasmic reticulum ATPase	VCP	505	3.55814	0.450112	4.11258	10.3919	13.206	4.86066	9.22625	4.86066	683
P49411	Elongation factor Tu. mitochondrial	TUFM	342	5.93049	1.10774	4.91364	4.75384	4.4224	19.1449	4.1215	4.75384	684
A0A0A0MTS7	Titin	TTN	19877	3.64595	4.63754	5.41561	1.71384	2.89027	12.5988	8.4327	4.63754	685
P02511	Alpha-crystallin B chain	CRYAB	90	28.681	2.91269	2.96006	4.62611	10.3865	4.621	3.20397	4.621	686
P02787	Serotransferrin	TF	323	6.35363	1.05912	3.97286	4.62036	10.7721	6.64201	3.41347	4.62036	687
O75323	Protein NipSnap homolog 2	GBAS	67	3.61174	4.59895	4.46879	4.67159	14.1798	14.7013	1.18777	4.59895	688
P31040-2	Succinate dehydrogenase [ubiquinone] flavoprotein subunit. mitochondrial	SDHA	450	35.0255	1.22835	1.45269	4.58037	44.3671	4.971	0.540993	4.58037	689
P05976;P05976-2	Myosin light chain 1/3. skeletal muscle isoform	MYL1	162	10.6855	1.21687	3.3577	4.85816	4.79973	4.57798	0.421666	4.57798	690
A0A0A0MTS7	Titin	TTN	13359	1.73206	1.86606	4.54623	2.29411	6.3825	6.71782	5.12859	4.54623	691
P11055;P12882;Q9UKX2;Q9Y623	Myosin-3;Myosin-1;Myosin-2;Myosin-4	MYH3;MYH1;MYH2;MYH4	945	2.79564	3.41365	2.88172	7.28329	4.49506	7.9491	6.51728	4.49506	692
Q05639	Elongation factor 1-alpha 2	EEF1A2	392	3.38927	2.9333	4.57347	4.4524	1.47629	7.84268	4.46407	4.4524	693
C9JFR7	Cytochrome c	CYCS	87	1.62003	0.908415	2.5509	6.72339	4.45213	9.4329	7.53995	4.45213	694
P04075	Fructose-bisphosphate aldolase A;Fructose-bisphosphate aldolase	ALDOA	330	4.44614	5.53397	5.09482	8.51553	2.76142	4.38309	4.05676	4.44614	695
A0A0A0MTS7	Titin	TTN	9712	4.21605	2.86004	4.45495	4.44348	2.6381	6.05209	6.52041	4.44348	696
P00505	Aspartate aminotransferase. mitochondrial	GOT2	234	0.136559	0.0937402	7.03825	1.5051	4.44069	18.1206	5.15363	4.44069	697
P61604	10 kDa heat shock protein. mitochondrial	HSPE1;HSPE1-MOB4	36	0.782084	0.909136	8.25032	4.76317	11.5608	4.42206	3.35216	4.42206	698
Q13642-5	Four and a half LIM domains protein 1	FHL1	13	5.04416	2.74265	1.20611	4.58917	5.5014	4.39662	1.63597	4.39662	699
P40939	Trifunctional enzyme subunit alpha. mitochondrial;Long-chain enoyl-CoA hydratase;Long chain 3-hydroxyacyl-CoA dehydrogenase	HADHA	334	1.59707	26.8713	13.1248	0.811587	4.37098	56.171	0.88595	4.37098	700
E9PNP3	Mth938 domain-containing protein	AAMDC	79	1.81919	5.95139	6.94957	12.1308	0.602028	4.28376	3.43832	4.28376	701
P06732	Creatine kinase M-type;Creatine kinase M-type. N-terminally processed	CKM	307	73.6429	0.721761	2.3358	3.4116	8.09094	7.79639	4.27684	4.27684	702
P06744	Glucose-6-phosphate isomerase	GPI	252	11.8822	1.28714	5.09894	0.953781	4.23208	4.50248	3.1406	4.23208	703
P09493;P09493-4;P09493-9	Tropomyosin alpha-1 chain	TPM1	48	5.19412	0.534932	2.25936	4.20423	5.36409	7.67862	1.91638	4.20423	704
P00505	Aspartate aminotransferase. mitochondrial	GOT2	296	15.6071	3.10712	4.59886	4.18806	3.99133	13.4227	1.65812	4.18806	705
A0A0C4DFU2	Superoxide dismutase;Superoxide dismutase [Mn]. mitochondrial	SOD2	130	3.87865	2.692	5.89176	0.554729	9.46002	7.22984	4.1583	4.1583	706
A0A0C4DFU2	Superoxide dismutase;Superoxide dismutase [Mn]. mitochondrial	SOD2	132	3.87865	2.692	5.89176	0.535349	9.46002	7.22984	4.1583	4.1583	707
P11142	Heat shock cognate 71 kDa protein	HSPA8	71	1.46446	4.14307	3.75275	8.74154	12.9595	6.20153	3.50222	4.14307	708
P05976	Myosin light chain 1/3. skeletal muscle isoform	MYL1	37	9.17494	0.207855	1.51522	18.2154	13.9653	4.12635	3.19764	4.12635	709
P25705	ATP synthase subunit alpha. mitochondrial	ATP5A1	531	3.27779	2.58114	9.53211	2.44549	4.11248	12.7055	5.50372	4.11248	710
P25705	ATP synthase subunit alpha. mitochondrial	ATP5A1	539	3.27779	2.58114	9.53211	2.44549	4.11248	12.7055	5.50372	4.11248	711
J3QS39	Ubiquitin-60S ribosomal protein L40;Ubiquitin;60S ribosomal protein L40;Ubiquitin-40S ribosomal protein S27a;Ubiquitin;40S ribosomal protein S27a;Polyubiquitin-B;Ubiquitin;Polyubiquitin-C;Ubiquitin	UBB;RPS27A;UBC;UBA52	27	1.65978	4.07549	1.52792	8.47347	5.3298	6.74825	0.227883	4.07549	712
Q9UKX2	Myosin-2	MYH2	1112	2.26895	0.167513	1.26974	4.01104	7.29075	5.99579	5.84218	4.01104	713
P55084	Trifunctional enzyme subunit beta. mitochondrial;3-ketoacyl-CoA thiolase	HADHB	253	0.336196	0.248757	6.1012	3.98072	1.36987	12.6843	5.02049	3.98072	714
O00499-6	Myc box-dependent-interacting protein 1;Bridging integrator 2;Amphiphysin	BIN1;BIN2;AMPH	28	21.9187	15.5785	0.447608	1.8722	5.0145	3.94411	1.60305	3.94411	715
Q02218	2-oxoglutarate dehydrogenase. mitochondrial	OGDH	970	0.791329	7.10863	6.23264	6.89694	3.80559	3.92189	1.08698	3.92189	716
Q9NP98	Myozenin-1	MYOZ1	233	4.31919	2.21683	3.72967	5.3966	3.88599	4.79203	2.33554	3.88599	717
P07900;P08238	Heat shock protein HSP 90-alpha;Heat shock protein HSP 90-beta;Putative heat shock protein HSP 90-beta-3	HSP90AA1;HSP90AB1;HSP90AB3P	354	2.4257	6.79339	4.23738	2.23894	1.50779	3.8722	5.44346	3.8722	718
P05976	Myosin light chain 1/3. skeletal muscle isoform	MYL1	32	13.896	1.17735	2.91455	23.8425	6.49872	3.82833	1.44848	3.82833	719
Q14315-2	Filamin-C	FLNC	2597	3.68805	3.94739	2.91558	5.36336	4.82094	3.82033	0.568941	3.82033	720
P62942	Peptidyl-prolyl cis-trans isomerase FKBP1A;Peptidyl-prolyl cis-trans isomerase	FKBP1A;FKBP12-Exip2;FKBP1C	48	9.74727	0.977256	0.42475	3.81878	9.09765	4.01284	2.91542	3.81878	721
P14618;P14618-2	Pyruvate kinase PKM;Pyruvate kinase	PKM	224	0.545015	2.47274	5.81802	5.11165	3.74216	2.25698	3.91668	3.74216	722
A0A0G2JIW1;P17066	Heat shock 70 kDa protein 1B;Heat shock 70 kDa protein 1A;Heat shock 70 kDa protein 6	HSPA1B;HSPA1A;HSPA6	508	4.7767	6.90123	2.75755	11.183	1.96559	3.72345	1.58091	3.72345	723
A0A0A0MTS7	Titin	TTN	20958	3.71479	2.07068	3.80376	2.8367	5.74694	6.58999	2.90217	3.71479	724
P40939	Trifunctional enzyme subunit alpha. mitochondrial;Long-chain enoyl-CoA hydratase;Long chain 3-hydroxyacyl-CoA dehydrogenase	HADHA	254	0.63114	1.10183	3.03544	3.6828	4.97266	28.347	19.7661	3.6828	725
P40939	Trifunctional enzyme subunit alpha. mitochondrial;Long-chain enoyl-CoA hydratase;Long chain 3-hydroxyacyl-CoA dehydrogenase	HADHA	255	0.842977	0.381083	3.03544	3.6828	4.97266	28.347	19.7661	3.6828	726
P61981	14-3-3 protein gamma;14-3-3 protein gamma. N-terminally processed	YWHAG	152	1.44944	0.58093	3.68252	11.2951	38.3624	5.50415	0.403904	3.68252	727
P06732	Creatine kinase M-type;Creatine kinase M-type. N-terminally processed	CKM	369	3.59909	3.63999	1.27407	6.1715	10.6916	7.3211	2.47678	3.63999	728
Q06830	Peroxiredoxin-1	PRDX1	27	1.3138	5.13365	4.41204	7.86637	2.14362	3.62718	1.09033	3.62718	729
P07195	L-lactate dehydrogenase B chain	LDHB	318	7.07922	6.84704	2.277	3.53796	2.62007	5.44802	0.878359	3.53796	730
A0A0A0MTS7	Titin	TTN	26664	2.93411	1.29984	2.79407	3.48993	3.53046	6.13932	6.17369	3.48993	731
P13929	Beta-enolase;Enolase	ENO3	92	2.84584	1.5439	3.42394	6.49897	12.8394	8.94827	3.12957	3.42394	732
Q16698-2	2.4-dienoyl-CoA reductase. mitochondrial	DECR1	88	3.41732	0.228457	0.74334	1.34731	6.86724	17.4958	4.1469	3.41732	733
P31930	Cytochrome b-c1 complex subunit 1. mitochondrial	UQCRC1	225	25.6543	0.669536	0.909236	3.4131	4.26974	10.1764	0.195322	3.4131	734
A0A0A0MTS7	Titin	TTN	20329	2.60958	0.67962	3.95389	3.3873	2.47933	7.3698	7.99551	3.3873	735
A0A0A0MTS7	Titin	TTN	23646	8.25593	1.7213	0.400027	4.08051	3.35239	8.80989	1.87498	3.35239	736
Q14324	Myosin-binding protein C. fast-type	MYBPC2	932	1.08166	2.31337	6.28982	6.81456	2.93199	4.04354	3.34888	3.34888	737
P02794	Ferritin heavy chain;Ferritin heavy chain. N-terminally processed;Ferritin	FTH1	69	19.1804	5.78543	2.22969	3.76797	3.33408	1.92368	3.13356	3.33408	738
A0A0A0MTS7	Titin	TTN	22459	1.51213	3.32091	6.7523	7.57448	2.49187	14.7586	2.70303	3.32091	739
P38646	Stress-70 protein. mitochondrial	HSPA9	610	9.33813	2.36582	4.82562	3.30691	2.91116	8.40366	1.49012	3.30691	740
A0A024R6I7;P01009	Alpha-1-antitrypsin;Short peptide from AAT	SERPINA1	352	1.97692	4.08355	3.25923	8.80351	3.58539	0.952692	2.66359	3.25923	741
P00738	Haptoglobin;Haptoglobin alpha chain;Haptoglobin beta chain	HP	291	1.34083	12.2945	3.24856	4.4431	8.81837	2.71454	0.876613	3.24856	742
P04406	Glyceraldehyde-3-phosphate dehydrogenase	GAPDH	227	0.849794	0.0122936	3.20848	9.22749	6.65102	0.440204	3.58228	3.20848	743
Q9UII2	ATPase inhibitor. mitochondrial	ATPIF1	49	3.06902	3.18467	1.41996	3.15217	8.51172	6.73655	3.5259	3.18467	744
O14983-2	Sarcoplasmic/endoplasmic reticulum calcium ATPase 1	ATP2A1	35	6.52596	0.130108	0.233733	3.15576	6.34303	3.68239	1.5336	3.15576	745
P11142	Heat shock cognate 71 kDa protein	HSPA8	589	8.94379	1.57617	0.253261	4.15322	3.12483	5.35132	0.318024	3.12483	746
P49411	Elongation factor Tu. mitochondrial	TUFM	342	3.11984	0.778859	3.70486	0.786963	5.86484	15.4891	0.536758	3.11984	747
P49411	Elongation factor Tu. mitochondrial	TUFM	347	3.11984	0.778859	3.70486	1.51477	5.86484	15.4891	0.537916	3.11984	748
P38117	Electron transfer flavoprotein subunit beta	ETFB	210	2.00852	1.30933	3.11847	7.74065	6.56578	28.9247	2.1651	3.11847	749
F8W1R7;P14649	Myosin light polypeptide 6;Myosin light chain 6B	MYL6;MYL6B	107	1.64718	0.104199	0.245001	21.1178	9.60325	9.62901	3.10459	3.10459	750
P00558	Phosphoglycerate kinase 1	PGK1	30	2.02693	3.08478	1.79238	3.58021	4.2553	3.57773	1.12025	3.08478	751
P35609	Alpha-actinin-2	ACTN2	405	3.57849	1.48499	2.0725	2.05447	3.69995	3.02169	3.2216	3.02169	752
Q06830	Peroxiredoxin-1	PRDX1	190	1.85023	1.91577	3.01969	4.69789	2.73414	4.24038	4.99977	3.01969	753
P12882;Q9UKX2;Q9Y623	Myosin-1;Myosin-2;Myosin-4	MYH1;MYH2;MYH4	1322	3.5681	2.98691	3.01136	4.84283	3.28849	2.63407	0.714245	3.01136	754
P68363;Q71U36;Q9BQE3	Tubulin alpha-1B chain;Tubulin alpha-1A chain;Tubulin alpha-3C/D chain;Tubulin alpha-3E chain;Tubulin alpha-1C chain	TUBA1B;TUBA1A;TUBA3C;TUBA3E;TUBA1C	336	4.71706	1.62383	2.97634	2.23011	6.75212	4.84268	1.45034	2.97634	755
A0A0A0MTS7	Titin	TTN	22880	8.56345	2.96733	2.89303	0.939993	6.05986	3.92073	2.39642	2.96733	756
P11217	Glycogen phosphorylase. muscle form	PYGM	438	1.38154	2.03394	2.96193	5.13297	4.73053	4.79442	2.90136	2.96193	757
P13805-2	Troponin T. slow skeletal muscle	TNNT1	236	13.0033	0.0679763	2.93788	1.95949	6.42147	6.66554	1.5087	2.93788	758
P23297	Protein S100-A1;Protein S100	S100A1	57	2.75195	4.54098	2.26638	5.67086	2.88672	6.70322	2.93116	2.93116	759
P14621	Acylphosphatase-2	ACYP2	58	1.83673	2.91398	0.823341	8.26042	4.35906	2.84795	3.04812	2.91398	760
A0A0G2JIW1	Heat shock 70 kDa protein 1B;Heat shock 70 kDa protein 1A	HSPA1B;HSPA1A	247	12.8754	3.31092	1.47243	2.8937	3.1691	1.58181	0.736905	2.8937	761
Q9UKX2	Myosin-2	MYH2	1300	1.82979	2.42911	6.68895	6.19216	4.12973	1.92098	2.84522	2.84522	762
A0A0A0MTS7	Titin	TTN	19047	2.8257	2.60149	2.38778	5.3749	2.52926	7.3152	15.877	2.8257	763
Q9UMS6-5	Synaptopodin-2	SYNPO2	305	0.789808	2.85391	1.63785	3.5048	2.36462	2.81986	4.11363	2.81986	764
P07951;Q5TCU3	Tropomyosin beta chain	TPM2	205	2.72495	0.323163	1.16519	6.55804	2.79451	9.05605	5.62523	2.79451	765
A0A0A0MTS7	Titin	TTN	27131	1.22757	2.76526	2.76855	2.40916	1.21226	7.27056	8.28201	2.76526	766
P08559	Pyruvate dehydrogenase E1 component subunit alpha. somatic form. mitochondrial;Pyruvate dehydrogenase E1 component subunit alpha. testis-specific form. mitochondrial	PDHA1;PDHA2	77	1.43263	0.605382	2.94042	9.53025	2.76128	2.96491	1.32781	2.76128	767
A0A0A0MTS7	Titin	TTN	30461	1.39566	2.73913	1.45805	3.44039	2.91435	3.54673	1.50918	2.73913	768
P62805	Histone H4	HIST1H4A	92	5.47249	0.459357	0.544909	2.72177	7.5158	4.92094	1.36398	2.72177	769
Q60FE5;Q14315-2	Filamin-A;Filamin-C	FLNA;FLNC	510	1.65934	4.95502	2.70568	3.63707	0.581997	2.08995	3.71672	2.70568	770
P12883	Myosin-7	MYH7	565	4.55435	4.24034	1.87279	2.69316	1.29675	2.85805	2.02195	2.69316	771
P00568	Adenylate kinase isoenzyme 1	AK1	31	13.1081	2.67133	1.45779	3.98502	7.51954	0.212107	0.0842039	2.67133	772
P17661	Desmin	DES	125	9.66159	0.430357	1.80864	2.3204	3.04665	2.77045	2.64321	2.64321	773
P17661	Desmin	DES	240	2.63149	2.46497	4.71539	0.170272	0.141453	6.21663	8.70961	2.63149	774
A0A0A0MTS7	Titin	TTN	11316	2.62113	1.44284	2.2287	3.4463	1.42704	3.3816	2.79486	2.62113	775
P16615-2	Sarcoplasmic/endoplasmic reticulum calcium ATPase 2	ATP2A2	510	2.0549	1.83642	2.50483	4.20862	4.31237	2.60199	5.7335	2.60199	776
Q96A32	Myosin regulatory light chain 2. skeletal muscle isoform	MYLPF	63	2.06967	2.02204	2.59618	3.90446	3.01224	3.70212	1.90405	2.59618	777
P40925	Malate dehydrogenase. cytoplasmic	MDH1	236	6.20717	2.5775	1.90082	3.36539	1.38333	2.58035	0.220724	2.5775	778
P14618;P14618-2	Pyruvate kinase PKM;Pyruvate kinase;Pyruvate kinase PKLR	PKM;PKLR	311	0.925928	0.392119	1.67113	2.57412	3.71381	6.09677	3.00616	2.57412	779
P14618;P14618-2	Pyruvate kinase PKM;Pyruvate kinase;Pyruvate kinase PKLR	PKM;PKLR	305	3.72185	0.0940293	1.28739	5.72163	2.5373	3.4734	2.19681	2.5373	780
P04406	Glyceraldehyde-3-phosphate dehydrogenase	GAPDH	139	3.08566	0.882323	1.65415	2.85922	6.47691	2.53031	1.99895	2.53031	781
P07951;Q5TCU3	Tropomyosin beta chain	TPM2	213	6.39315	2.26902	1.2822	2.48889	9.01455	12.9813	0.433861	2.48889	782
A6NHL2-2;C9J2C0;P68363;P68366-2;Q71U36;Q9BQE3	Tubulin alpha chain-like 3;Tubulin alpha-8 chain;Tubulin alpha-1B chain;Tubulin alpha-4A chain;Tubulin alpha-1A chain;Tubulin alpha-3C/D chain;Tubulin alpha-1C chain	TUBAL3;TUBA8;TUBA1B;TUBA4A;TUBA1A;TUBA3C;TUBA1C	401	3.22602	1.62838	2.11073	3.91002	3.6186	2.47259	2.13736	2.47259	783
Q6ZMU5	Tripartite motif-containing protein 72	TRIM72	178	0.948563	3.68238	1.8087	2.44909	5.66716	3.52517	1.69451	2.44909	784
P48735	Isocitrate dehydrogenase [NADP]. mitochondrial	IDH2	69	22.094	2.44793	1.74608	7.1601	0.204678	11.6938	0.108524	2.44793	785
P00558;P07205	Phosphoglycerate kinase 1;Phosphoglycerate kinase 2	PGK1;PGK2	156	12.0917	2.44618	0.0460431	3.07508	2.37874	2.90086	0.303481	2.44618	786
A0A087WXS0	Troponin I. fast skeletal muscle	TNNI2	79	2.35296	2.80936	1.29357	3.6452	2.44153	3.06862	1.09575	2.44153	787
P06732	Creatine kinase M-type;Creatine kinase M-type. N-terminally processed	CKM	365	2.38094	0.708395	1.09136	2.3896	2.78126	3.33535	1.8745	2.38094	788
P14927	Cytochrome b-c1 complex subunit 7	UQCRB	72	5.90095	2.37957	0.200366	4.06229	9.73227	2.21665	0.0997807	2.37957	789
O60662	Kelch-like protein 41	KLHL41	243	1.82568	2.36621	1.42938	3.77809	2.61229	3.23724	0.491348	2.36621	790
A0A0G2JIW1	Heat shock 70 kDa protein 1B;Heat shock 70 kDa protein 1A	HSPA1B;HSPA1A	349	8.02346	1.29087	0.599701	14.9517	7.76161	1.10088	2.3612	2.3612	791
A0A087X1N7	Nebulin	NEB	420	1.03514	2.35915	0.97264	1.81377	2.71104	2.37048	2.36711	2.35915	792
P12882;Q9UKX2	Myosin-1;Myosin-2	MYH1;MYH2	1048	12.48	1.05494	1.03194	2.01198	3.4814	3.15025	2.33081	2.33081	793
A0A0C4DFU2	Superoxide dismutase;Superoxide dismutase [Mn]. mitochondrial	SOD2	68	205.755	0.300952	2.28668	4.60427	3.84814	1.92119	0.062985	2.28668	794
P40925	Malate dehydrogenase. cytoplasmic;Malate dehydrogenase	MDH1	73	4.43615	0.376421	0.238152	3.87609	3.47867	2.28489	2.03884	2.28489	795
P31415	Calsequestrin-1	CASQ1	55	4.60651	2.27728	1.12666	3.43867	0.829301	2.43232	0.294349	2.27728	796
P11055;P12882;P13533;Q9UKX2;Q9Y623	Myosin-3;Myosin-1;Myosin-6;Myosin-2;Myosin-4	MYH3;MYH1;MYH6;MYH2;MYH4	957	36.047	0.201686	2.55694	4.76285	0.6177	2.25226	0.262272	2.25226	797
P68104;Q05639	Elongation factor 1-alpha 1;Putative elongation factor 1-alpha-like 3;Elongation factor 1-alpha;Elongation factor 1-alpha 2	EEF1A1;EEF1A1P5;EEF1A2	44	9.14989	2.6105	2.24506	6.35969	1.95501	1.38558	1.29863	2.24506	798
A0A0A0MTS7	Titin	TTN	33767	1.04956	2.23118	1.89149	3.13221	2.09072	6.34858	6.74526	2.23118	799
P40939	Trifunctional enzyme subunit alpha. mitochondrial;Long-chain enoyl-CoA hydratase;Long chain 3-hydroxyacyl-CoA dehydrogenase	HADHA	644	0.763035	0.59019	4.28258	2.21207	10.0453	6.44408	0.628019	2.21207	800
P12883;P13533	Myosin-7;Myosin-6	MYH7;MYH6	1569	1.14445	2.20926	2.93509	5.39187	3.22781	1.49826	0.15571	2.20926	801
O00483	Cytochrome c oxidase subunit NDUFA4	NDUFA4	73	0.445198	0.870325	2.17639	2.2119	5.21408	6.4586	2.0737	2.17639	802
A0A0A0MTS7	Titin	TTN	5556	0.611257	2.90252	2.1663	3.83688	0.959842	4.81359	0.781351	2.1663	803
C9JZN9	Troponin T. fast skeletal muscle	TNNT3	221	0.414431	0.110736	2.6995	2.15114	1.24589	2.31109	3.40809	2.15114	804
H0YK48;P09493;P09493-4;P09493-6	Tropomyosin alpha-1 chain	TPM1	251	16.9752	2.13793	1.31189	1.8351	2.9555	2.35216	0.304928	2.13793	805
A0A087X1N7	Nebulin	NEB	385	640.992	0.265394	0.666917	2.129	2.68488	2.87749	1.06063	2.129	806
A0A0A0MTS7	Titin	TTN	19519	2.05347	1.85836	3.66475	2.12215	3.59001	5.23677	1.03742	2.12215	807
B0QYF7;P02144	Myoglobin	MB	97	18.026	2.11529	2.11351	4.12759	1.37842	1.58349	1.38208	2.11351	808
P12883;P13533	Myosin-7;Myosin-6	MYH7;MYH6	1042	8.02702	0.749116	1.33518	1.81768	2.11024	2.41701	2.32546	2.11024	809
P12883	Myosin-7	MYH7	1106	3.81035	2.35182	1.09701	1.80179	1.62609	2.09971	2.18233	2.09971	810
P54296	Myomesin-2	MYOM2	35	2.69945	1.80751	1.70455	3.03323	1.9332	2.0805	2.60877	2.0805	811
P12883;P13533	Myosin-7;Myosin-6	MYH7;MYH6	1579	7.90781	1.35222	2.10636	2.07985	0.953223	2.04244	1.87865	2.04244	812
P02647	Apolipoprotein A-I;Proapolipoprotein A-I;Truncated apolipoprotein A-I	APOA1	130	2.47473	0.315919	0.819126	2.00108	2.56504	2.31454	0.270583	2.00108	813
A0A0A0MTS7	Titin	TTN	22135	1.21728	2.81576	1.64253	2.36396	3.17621	1.97333	1.57645	1.97333	814
P36871;P36871-2	Phosphoglucomutase-1	PGM1	440	5.76402	1.182	0.432146	1.62244	2.92924	2.3536	1.93597	1.93597	815
H0YL11;P48735	Isocitrate dehydrogenase [NADP]. mitochondrial	IDH2	193	1.17079	1.06351	6.81694	1.68943	11.4698	17.9904	1.90857	1.90857	816
H0YL11;P48735	Isocitrate dehydrogenase [NADP]. mitochondrial	IDH2	199	1.17079	1.06351	6.81694	1.68943	11.4698	17.9904	1.90857	1.90857	817
H0YK48;P09493;P09493-4;P09493-6	Tropomyosin alpha-1 chain	TPM1	264	3.63443	1.69353	0.807315	2.59245	2.47488	1.85787	0.451685	1.85787	818
B0QYF7;P02144	Myoglobin	MB	78	6.14522	1.42528	1.85294	1.97781	7.91285	1.41458	1.59803	1.85294	819
Q53GG5	PDZ and LIM domain protein 3	PDLIM3	363	0.70939	1.80553	0.11705	2.32564	5.1281	2.83323	0.299118	1.80553	820
A0A0C4DFM5	Myotilin	MYOT	297	1.78842	0.684357	0.631391	1.39823	3.81306	9.85944	6.09676	1.78842	821
Q99497	Protein deglycase DJ-1	PARK7	62	17.6317	0.570847	1.72969	2.5256	3.35819	1.52908	0.445669	1.72969	822
O60662	Kelch-like protein 41	KLHL41	238	4.00445	2.08341	0.757802	0.669785	2.04304	0.729472	1.68924	1.68924	823
K7EQW8;P06753	Tropomyosin alpha-3 chain	TPM4;TPM3	265	1.68324	1.97795	0.11737	1.65696	2.82478	3.30585	0.712359	1.68324	824
P12883;P13533	Myosin-7;Myosin-6	MYH7;MYH6	939	5.15001	1.37761	0.721743	1.67786	1.28192	2.38167	2.02082	1.67786	825
P07451	Carbonic anhydrase 3	CA3	224	1.66795	1.94502	1.68495	1.74348	0.545765	1.66385	0.795371	1.66795	826
P00558	Phosphoglycerate kinase 1	PGK1	11	4.65495	1.55862	1.62861	5.326	0.147225	0.198722	2.23942	1.62861	827
P21796	Voltage-dependent anion-selective channel protein 1	VDAC1	109	0.276473	1.09697	0.695404	3.18284	1.60805	2.94729	2.09314	1.60805	828
J3QS39	Ubiquitin-60S ribosomal protein L40;Ubiquitin;60S ribosomal protein L40;Ubiquitin-40S ribosomal protein S27a;Ubiquitin;40S ribosomal protein S27a;Polyubiquitin-B;Ubiquitin;Polyubiquitin-C;Ubiquitin	UBB;RPS27A;UBC;UBA52	33	0.146905	0.296918	1.20439	2.08389	1.60517	2.36369	2.27497	1.60517	829
P40926	Malate dehydrogenase. mitochondrial;Malate dehydrogenase	MDH2	335	3.13025	0.0665321	0.9361	1.59826	2.05487	1.92753	0.0690705	1.59826	830
P40939	Trifunctional enzyme subunit alpha. mitochondrial;Long-chain enoyl-CoA hydratase;Long chain 3-hydroxyacyl-CoA dehydrogenase	HADHA	519	1.6909	1.0143	1.38152	1.86353	0.709052	3.12319	1.58822	1.58822	831
P36871	Phosphoglucomutase-1	PGM1	8	7.51791	2.6844	1.0409	1.58664	4.05221	0.89454	0.653669	1.58664	832
P13929	Beta-enolase;Enolase	ENO3	179	0.43533	1.30973	2.858	2.93145	4.61489	1.33033	1.58241	1.58241	833
Q14315-2	Filamin-C	FLNC	573	1.0904	0.19988	1.56083	3.09442	3.64828	1.60049	0.526191	1.56083	834
P35609	Alpha-actinin-2	ACTN2	311	7.69569	1.46492	1.56007	3.32171	1.29391	2.05278	1.39534	1.56007	835
A2A274	Aconitate hydratase. mitochondrial	ACO2	490	1.54908	1.43099	1.69872	2.60122	1.00345	4.76475	0.516085	1.54908	836
A0A0A0MTS7	Titin	TTN	11126	1.09221	2.02376	1.25298	1.2925	2.58928	1.66735	1.54709	1.54709	837
A2A274	Aconitate hydratase. mitochondrial	ACO2	725	0.107633	0.848841	1.62848	2.38238	1.54113	2.64641	0.942753	1.54113	838
P31040-2	Succinate dehydrogenase [ubiquinone] flavoprotein subunit. mitochondrial	SDHA	469	2.30193	1.3883	1.52401	1.39732	7.78577	5.62846	0.801063	1.52401	839
P14618;P14618-2	Pyruvate kinase PKM;Pyruvate kinase	PKM	498	1.31051	4.74168	1.52259	1.47616	1.70098	2.41819	0.745109	1.52259	840
P13929	Beta-enolase;Enolase	ENO3	256	11.4769	0.243354	0.605557	1.65102	1.60379	1.52087	0.685451	1.52087	841
P12882;Q9UKX2;Q9Y623	Myosin-1;Myosin-2;Myosin-4	MYH1;MYH2;MYH4	997	1.51926	0.18601	1.54565	3.7153	2.46636	0.548397	0.0912346	1.51926	842
A0A286YFB1;C9JZN9;H9KVA2;P13805-2	Troponin T. fast skeletal muscle;Troponin T. slow skeletal muscle	TNNT3;TNNT1	74	8.4894	0.981899	1.01851	4.81802	2.92672	1.5152	0.603426	1.5152	843
A0A0A0MTS7	Titin	TTN	12970	1.90053	1.50697	0.582805	1.81643	5.38303	1.31228	1.10976	1.50697	844
A0A0A0MTS7	Titin	TTN	13469	1.33743	0.719052	0.859491	6.33449	1.49187	4.98523	1.97573	1.49187	845
P12882;Q9UKX2;Q9Y623	Myosin-1;Myosin-2;Myosin-4	MYH1;MYH2;MYH4	NaN	6.84343	1.48523	0.735358	3.64136	0.810905	1.67358	0.0555391	1.48523	846
P54296	Myomesin-2	MYOM2	749	5.12177	0.47116	4.23034	2.92288	1.09085	0.90716	1.48378	1.48378	847
O14983-2	Sarcoplasmic/endoplasmic reticulum calcium ATPase 1	ATP2A1	169	1.78514	0.532141	0.3021	1.47817	2.47547	2.96305	1.20853	1.47817	848
A0A087X1N7	Nebulin	NEB	2445	0.757522	0.812722	2.08426	1.45946	0.806318	2.77594	2.43318	1.45946	849
P21796	Voltage-dependent anion-selective channel protein 1	VDAC1	61	1.45049	1.92537	0.430721	2.21272	1.15987	1.51882	1.08304	1.45049	850
A2A274	Aconitate hydratase. mitochondrial	ACO2	426	5.78851	0.693146	0.468234	1.43076	5.09923	3.95325	0.885195	1.43076	851
P06732	Creatine kinase M-type;Creatine kinase M-type. N-terminally processed	CKM	170	0.303431	1.33659	1.42716	1.81195	2.20334	1.98453	0.326854	1.42716	852
P14618;P14618-2	Pyruvate kinase PKM;Pyruvate kinase	PKM	206	1.4253	2.12788	0.0327075	4.97612	0.957608	2.92141	0.0749733	1.4253	853
P11217	Glycogen phosphorylase. muscle form	PYGM	545	0.795841	2.38333	1.4072	2.75378	0.121786	1.59088	0.119183	1.4072	854
P00505	Aspartate aminotransferase. mitochondrial	GOT2	302	12.5305	0.497779	1.40657	0.602185	2.36147	5.33641	0.597946	1.40657	855
P00505	Aspartate aminotransferase. mitochondrial	GOT2	296	12.5305	0.41015	1.40657	1.03642	2.36147	5.33641	0.597946	1.40657	856
Q00872-10;Q00872-4	Myosin-binding protein C. slow-type	MYBPC1	812	1.00534	0.117836	1.61711	4.08444	3.08215	1.38376	0.833654	1.38376	857
Q86TD4	Sarcalumenin	SRL	535	6.44813	1.30689	0.262702	0.775642	6.47058	3.62534	1.35633	1.35633	858
B4DJV2	Citrate synthase;Citrate synthase. mitochondrial	CS	369	1.35548	0.159295	7.16192	3.60002	0.510605	11.9928	0.866129	1.35548	859
P08670;P17661	Vimentin;Desmin	VIM;DES	104	1.92854	1.30728	0.100885	1.76232	3.72011	1.32839	0.351623	1.32839	860
A0A087X1N7	Nebulin	NEB	982	0.859441	0.670304	1.32364	2.9364	2.22074	4.22411	0.847661	1.32364	861
A0A087WXS0	Troponin I. fast skeletal muscle	TNNI2	99	5.68772	1.31501	0.87281	2.61756	4.01836	0.0844489	0.246546	1.31501	862
P06732	Creatine kinase M-type;Creatine kinase M-type. N-terminally processed	CKM	156	1.20708	0.543549	1.29876	3.16474	2.01551	2.35976	0.496032	1.29876	863
P11055;P12882;P12883;P13533;Q9UKX2;Q9UKX3;Q9Y623	Myosin-3;Myosin-1;Myosin-7;Myosin-6;Myosin-2;Myosin-13;Myosin-4	MYH3;MYH1;MYH7;MYH6;MYH2;MYH13;MYH4	1391	0.150209	0.397151	1.55425	2.5836	1.29342	1.90382	0.637374	1.29342	864
P12883	Myosin-7	MYH7	865	13.1263	0.545748	0.987913	1.287	0.95507	1.98963	2.05631	1.287	865
P12883	Myosin-7	MYH7	1831	5.58001	0.969782	0.860636	1.24886	1.29675	1.68792	1.26014	1.26014	866
Q9UKX2	Myosin-2	MYH2	640	1.44492	0.140226	1.59895	2.62474	1.25523	0.146133	0.125319	1.25523	867
P06732	Creatine kinase M-type;Creatine kinase M-type. N-terminally processed	CKM	298	25.249	0.70394	0.716049	1.25405	2.91852	1.78441	0.751154	1.25405	868
Q9UKX2	Myosin-2	MYH2	281	1.01454	0.168914	1.45238	1.43629	1.2536	1.83366	0.132862	1.2536	869
A0A087X1N7	Nebulin	NEB	1819	1.34183	1.24789	0.89456	1.31501	2.40396	0.797582	0.811857	1.24789	870
P12883;P13533	Myosin-7;Myosin-6	MYH7;MYH6	278	1.23982	0.278627	1.17403	0.552348	0.582294	2.47355	2.4067	1.17403	871
P08590	Myosin light chain 3	MYL3	41	1.09652	1.17275	0.84848	2.19203	2.30463	1.68093	1.10399	1.17275	872
Q53GG5	PDZ and LIM domain protein 3	PDLIM3	79	56.7568	1.16808	1.43232	1.24463	0.756596	1.00166	0.911903	1.16808	873
P12883;P13533	Myosin-7;Myosin-6	MYH7;MYH6	1240	0.231433	0.237463	0.943371	1.94876	1.15702	3.15907	2.69104	1.15702	874
P06732	Creatine kinase M-type;Creatine kinase M-type. N-terminally processed	CKM	177	1.10741	1.14056	1.04691	1.96994	1.63264	1.29245	0.500093	1.14056	875
P35609	Alpha-actinin-2	ACTN2	842	4.10437	0.0314223	0.166755	1.85286	2.85516	0.73046	1.13885	1.13885	876
P36871;P36871-2	Phosphoglucomutase-1	PGM1	523	3.03351	0.185924	0.782971	1.13133	2.17294	1.31164	0.32311	1.13133	877
P12882;Q9UKX2	Myosin-1;Myosin-2	MYH1;MYH2	1330	3.81814	0.323251	0.390144	1.18977	0.0363767	1.10535	1.29263	1.10535	878
P12882;Q9UKX2;Q9Y623	Myosin-1;Myosin-2;Myosin-4	MYH1;MYH2;MYH4	1171	0.0874694	0.721681	1.63893	3.45652	1.0629	2.35757	0.741009	1.0629	879
P12883;P13533	Myosin-7;Myosin-6	MYH7;MYH6	450	0.494862	1.04114	0.624909	1.17974	0.369298	1.07423	1.06626	1.04114	880
P17540	Creatine kinase S-type. mitochondrial	CKMT2	408	0.0923602	0.0333753	0.380448	2.78678	1.0394	1.12198	1.28564	1.0394	881
P12883	Myosin-7	MYH7	1294	1.72715	0.047522	1.22429	0.805564	0.0322764	1.03151	1.06539	1.03151	882
P14618;P14618-2	Pyruvate kinase PKM;Pyruvate kinase	PKM	62	0.40322	0.168176	0.438688	1.57694	1.2634	1.56594	1.00391	1.00391	883
Q14315-2	Filamin-C	FLNC	498	0.176166	1.0031	1.19883	3.16213	0.267514	2.42959	0.588842	1.0031	884
P13929	Beta-enolase;Enolase	ENO3	275	20.1475	0.207926	0.534814	0.998353	3.90209	1.01731	0.654116	0.998353	885
P11217	Glycogen phosphorylase. muscle form	PYGM	10	4.15695	0.0777591	1.06894	0.104749	0.945085	0.976701	1.02103	0.976701	886
P30041	Peroxiredoxin-6	PRDX6	125	3.10988	0.432252	0.961199	1.50357	0.483914	0.647337	0.965745	0.961199	887
P24752	Acetyl-CoA acetyltransferase. mitochondrial	ACAT1	251	4.86857	0.121946	0.32115	0.923348	3.01913	7.69108	0.6112	0.923348	888
P12883	Myosin-7	MYH7	1279	0.908744	0.382761	0.606082	1.88759	0.909786	0.497407	1.30596	0.908744	889
J3KN67;P06753;P09493;P09493-4;P09493-9;Q6ZN40	Tropomyosin alpha-3 chain;Tropomyosin alpha-1 chain	TPM3;TPM1	60	3.27839	0.528102	0.906532	3.19026	0.401053	1.35722	0.72641	0.906532	890
Q9UKX2	Myosin-2	MYH2	786	0.247864	0.0452571	0.892508	1.64628	0.116818	1.80456	0.983706	0.892508	891
P06744	Glucose-6-phosphate isomerase	GPI	89	2.72338	0.960584	0.476383	0.260922	0.88193	1.50804	0.206049	0.88193	892
P15259	Phosphoglycerate mutase 2	PGAM2	146	2.34264	0.622565	0.291065	1.74064	0.8802	0.89325	0.437078	0.8802	893
P00568	Adenylate kinase isoenzyme 1	AK1	147	0.324003	1.22301	1.19378	2.39101	0.198195	0.813818	0.875386	0.875386	894
P11142	Heat shock cognate 71 kDa protein	HSPA8	601	7.75787	0.672511	0.131268	4.07411	0.569105	6.30155	0.870843	0.870843	895
P12883	Myosin-7	MYH7	83	4.20892	0.903036	0.806089	0.557698	0.860386	1.1049	0.819088	0.860386	896
P12882	Myosin-1	MYH1	1583	1.86553	0.0849401	0.599291	1.18563	0.240734	0.842256	1.2867	0.842256	897
P00338	L-lactate dehydrogenase A chain	LDHA	222	13.6609	0.593651	0.119749	0.916481	0.8262	0.936268	0.472356	0.8262	898
P10916	Myosin regulatory light chain 2. ventricular/cardiac muscle isoform	MYL2	115	0.429972	0.0201623	0.0267153	1.75806	1.31876	1.26786	0.814828	0.814828	899
P16615-2	Sarcoplasmic/endoplasmic reticulum calcium ATPase 2	ATP2A2	169	0.159439	0.282323	0.205485	0.811858	1.54379	1.27036	0.83476	0.811858	900
Q14315-2	Filamin-C	FLNC	524	2.02938	2.331	0.779485	1.95826	0.617691	0.438464	0.25052	0.779485	901
P12883	Myosin-7	MYH7	1324	1.58366	0.408329	0.404214	0.829397	0.375429	0.774651	0.767537	0.767537	902
F2Z337;P02144	Myoglobin	MB	51	6.86819	0.765803	0.87146	1.64817	0.455403	0.648174	0.746008	0.765803	903
Q14315-2	Filamin-C	FLNC	2556	5.94103	0.343119	0.145657	1.35304	0.75565	1.2214	0.205771	0.75565	904
P24752	Acetyl-CoA acetyltransferase. mitochondrial	ACAT1	202	11.9767	1.42903	1.12291	0.7466	0.475568	0.482664	0.14705	0.7466	905
P13929	Beta-enolase;Enolase	ENO3	28	1.65857	0.0236574	0.139402	0.840718	1.07376	0.745123	0.587529	0.745123	906
P17540	Creatine kinase S-type. mitochondrial	CKMT2	418	0.46642	0.738936	0.557504	3.68574	3.945	1.38358	0.0645936	0.738936	907
B4DJV2	Citrate synthase;Citrate synthase. mitochondrial	CS	314	5.44369	0.111127	0.73451	0.42911	1.17815	5.16322	0.301018	0.73451	908
B4DJV2	Citrate synthase;Citrate synthase. mitochondrial	CS	308	5.44369	0.512035	0.73451	0.531902	1.17815	5.16322	0.178598	0.73451	909
P10916	Myosin regulatory light chain 2. ventricular/cardiac muscle isoform	MYL2	62	0.723658	0.488748	0.50798	1.57881	1.2254	1.52539	0.681145	0.723658	910
P06732	Creatine kinase M-type;Creatine kinase M-type. N-terminally processed	CKM	304	7.97337	0.556914	0.716049	1.32811	1.57484	0.0268963	0.55423	0.716049	911
A0A087X1N7	Nebulin	NEB	5638	0.492167	0.287086	0.697949	1.56024	0.371298	4.35361	2.3255	0.697949	912
P12882	Myosin-1	MYH1	1110	1.05403	0.0792405	0.270661	0.805705	0.0568742	0.694019	0.987632	0.694019	913
P06732	Creatine kinase M-type;Creatine kinase M-type. N-terminally processed	CKM	182	3.69876	0.35999	0.503703	0.706019	1.62541	0.691252	0.412796	0.691252	914
Q14315-2	Filamin-C	FLNC	832	1.78864	0.593371	0.798286	0.683593	0.243099	1.46709	0.262997	0.683593	915
G3V1N2;P69905	Hemoglobin subunit alpha	HBA2;HBA1	140	0.309293	0.680284	0.869561	1.20894	0.484243	1.03037	0.338356	0.680284	916
P04792	Heat shock protein beta-1	HSPB1	114	0.100179	0.671472	0.32461	0.827919	0.802757	1.00623	0.138112	0.671472	917
P11217	Glycogen phosphorylase. muscle form	PYGM	656	0.100899	0.0643032	0.0728645	1.49838	1.36164	0.889954	0.670678	0.670678	918
P40925	Malate dehydrogenase. cytoplasmic;Malate dehydrogenase	MDH1	110	0.109115	0.736467	0.549119	0.980468	0.40735	0.932985	0.65292	0.65292	919
P10916	Myosin regulatory light chain 2. ventricular/cardiac muscle isoform	MYL2	165	14.9146	0.134376	0.361936	0.511907	0.777254	0.839237	0.649316	0.649316	920
Q96A32	Myosin regulatory light chain 2. skeletal muscle isoform	MYLPF	105	0.442082	0.859365	0.639818	1.34018	0.571866	0.571184	0.0459828	0.571866	921
J3KN67;P06753;P09493;P09493-4;P09493-9;Q6ZN40	Tropomyosin alpha-3 chain;Tropomyosin alpha-1 chain	TPM3;TPM1	66	1.10849	0.383264	0.479273	1.30569	0.5563	0.722393	0.273278	0.5563	922
P12882;Q9UKX2;Q9Y623	Myosin-1;Myosin-2;Myosin-4	MYH1;MYH2;MYH4	916	5.21491	0.192498	0.537541	0.551768	0.756724	0.263524	0.214782	0.537541	923
P04406	Glyceraldehyde-3-phosphate dehydrogenase	GAPDH	117	0.38777	0.0065716	0.58323	0.521158	0.968055	0.705366	0.25927	0.521158	924
P12882	Myosin-1	MYH1	1244	0.431237	0.0308651	0.359183	0.7271	0.492572	1.07809	0.792888	0.492572	925
P02144	Myoglobin	MB	148	0.255448	0.16402	0.176608	1.23828	0.571435	0.631284	0.486868	0.486868	926
P12883	Myosin-7	MYH7	951	4.33115	0.486854	0.359946	0.571998	0.239076	0.73388	0.333386	0.486854	927
P12883;P13533	Myosin-7;Myosin-6	MYH7;MYH6	1895	2.05841	0.121571	0.0714327	0.648065	0.716561	0.486292	0.348292	0.486292	928
P04406	Glyceraldehyde-3-phosphate dehydrogenase	GAPDH	215	0.420772	0.902474	0.481985	2.53431	0.0171353	0.975727	0.0128088	0.481985	929
P60709;P63261;P68032;P68133	Actin. cytoplasmic 1;Actin. cytoplasmic 1. N-terminally processed;Actin. cytoplasmic 2;Actin. cytoplasmic 2. N-terminally processed;Actin. alpha cardiac muscle 1;Actin. aortic smooth muscle;Actin. gamma-enteric smooth muscle;Actin. alpha skeletal muscle	ACTB;ACTG1;ACTC1;ACTA2;ACTG2;ACTA1	52	10.7783	0.391672	0.225389	1.94104	1.80004	0.458086	0.10531	0.458086	930
P17540	Creatine kinase S-type. mitochondrial	CKMT2	209	0.726113	0.281919	0.227635	0.440526	0.818922	0.691789	0.420706	0.440526	931
P06732	Creatine kinase M-type;Creatine kinase M-type. N-terminally processed	CKM	366	0.00338311	0.409889	2.09383	0.42213	0.273069	1.05897	0.182036	0.409889	932
Q14315-2	Filamin-C	FLNC	2084	11.5377	0.222896	0.114499	0.946029	0.236723	1.35008	0.400638	0.400638	933
P12882;Q9Y623	Myosin-1;Myosin-4	MYH1;MYH4	880	0.141511	0.0362276	0.390954	0.640331	0.351263	0.672981	1.32656	0.390954	934
P17661	Desmin	DES	449	0.299908	0.574662	0.235656	0.940702	0.384437	0.933846	0.164675	0.384437	935
P10606	Cytochrome c oxidase subunit 5B. mitochondrial	COX5B	121	23.5013	0.102881	0.32047	0.383957	0.926346	0.856407	0.227368	0.383957	936
Q9UKX2	Myosin-2	MYH2	1844	0.0469511	0.487946	0.382229	0.496538	0.358915	0.731734	0.315737	0.382229	937
Q9UKX2	Myosin-2	MYH2	871	1.40883	0.379175	0.414102	0.310218	0.20178	0.501478	0.248621	0.379175	938
P11055;P13533;Q9UKX2	Myosin-3;Myosin-6;Myosin-2	MYH3;MYH6;MYH2	853	0.203183	0.291404	0.44503	3.00457	0.155045	0.420597	0.36367	0.36367	939
P13805-2	Troponin T. slow skeletal muscle	TNNT1	221	1.54633	0.0258603	0.19531	0.403193	0.762278	0.360471	0.0798105	0.360471	940
P17661	Desmin	DES	193	0.758905	0.125073	0.343384	1.66639	0.953494	0.168872	0.17362	0.343384	941
P12883	Myosin-7	MYH7	1022	1.98755	0.324084	0.334485	0.93903	0.130952	0.468868	0.0406429	0.334485	942
P12882	Myosin-1	MYH1	49	0.143732	0.0315664	0.33285	0.473689	0.147578	0.415239	0.473994	0.33285	943
P36871	Phosphoglucomutase-1	PGM1	16	0.179862	1.28757	0.207666	0.752097	0.259792	1.31274	0.314578	0.314578	944
P11055;P12882;P12883;P13533;Q9UKX2;Q9UKX3;Q9Y623	Myosin-3;Myosin-1;Myosin-7;Myosin-6;Myosin-2;Myosin-13;Myosin-4	MYH3;MYH1;MYH7;MYH6;MYH2;MYH13;MYH4	968	7.17279	1.35456	0.239445	0.312875	0.624634	0.301331	0.284107	0.312875	945
P12883;P13533	Myosin-7;Myosin-6	MYH7;MYH6	1587	0.116436	0.172322	0.438467	0.446311	0.318797	0.0513338	0.311389	0.311389	946
P13805-2	Troponin T. slow skeletal muscle	TNNT1	116	2.44836	0.298394	0.210567	0.476852	0.294219	0.237364	0.0724832	0.294219	947
P00568	Adenylate kinase isoenzyme 1	AK1	27	2.74355	0.08476	2.34164	3.34457	0.108136	0.283598	0.266534	0.283598	948
Q00872-10;Q00872-4	Myosin-binding protein C. slow-type	MYBPC1	105	0.265009	0.100921	0.281782	0.0822166	5.07854	1.97689	2.72669	0.281782	949
P06732	Creatine kinase M-type;Creatine kinase M-type. N-terminally processed	CKM	105	5.98003	0.21831	0.215802	0.280433	0.569978	0.382732	0.129253	0.280433	950
P07951;Q5TCU3	Tropomyosin beta chain	TPM2	189	0.3642	0.0760191	0.0802129	0.41284	0.275845	0.294392	0.0227569	0.275845	951
P06576	ATP synthase subunit beta. mitochondrial;ATP synthase subunit beta	ATP5B	159	0.413161	0.256748	0.266649	0.106834	1.52554	0.618413	0.0849379	0.266649	952
Q9NP98	Myozenin-1	MYOZ1	11	0.266289	0.619251	0.153939	0.963757	0.212186	0.400672	0.0871398	0.266289	953
P11217	Glycogen phosphorylase. muscle form	PYGM	787	3.07146	0.152135	0.348895	0.239549	0.168032	0.531113	0.260596	0.260596	954
P00558	Phosphoglycerate kinase 1	PGK1	272	0.346353	0.0867267	0.138213	0.349505	0.254158	0.129896	0.244434	0.244434	955
Q9UKX2	Myosin-2	MYH2	1901	3.67789	0.0741812	0.238737	0.267668	1.46361	0.17454	0.11763	0.238737	956
P35609	Alpha-actinin-2	ACTN2	864	0.575958	0.225447	0.390279	0.23923	0.0955505	0.177319	0.0602244	0.225447	957
J3KN67;P06753	Tropomyosin alpha-3 chain	TPM3	49	0.223932	0.171397	0.210122	0.267538	0.221781	0.444487	0.133801	0.221781	958
P06576	ATP synthase subunit beta. mitochondrial;ATP synthase subunit beta	ATP5B	124	0.0900885	0.31507	0.0683629	0.206308	0.100484	0.347341	0.387337	0.206308	959
P12883;P13533	Myosin-7;Myosin-6	MYH7;MYH6	1791	0.0633534	0.199347	0.113722	0.748439	0.317594	0.230521	0.0471479	0.199347	960
Q96A32	Myosin regulatory light chain 2. skeletal muscle isoform	MYLPF	47	0.00993322	0.152949	0.140268	0.490695	0.443426	0.230942	0.192272	0.192272	961
P12883	Myosin-7;Myosin-15	MYH7;MYH15	363	0.855601	0.0400344	0.0370398	0.301552	0.177359	0.477022	0.190412	0.190412	962
P12277	Creatine kinase B-type	CKB	313	0.0766245	0.468124	0.00468809	0.183406	0.706183	0.678624	0.0137911	0.183406	963
P05976	Myosin light chain 1/3. skeletal muscle isoform	MYL1	8	1.36288	0.0320467	0.180668	0.134278	2.0925	0.568519	0.147683	0.180668	964
P12883	Myosin-7	MYH7	853	0.0230356	0.179323	0.161751	0.351078	0.152865	0.542255	0.247336	0.179323	965
P12882;Q9UKX2	Myosin-1;Myosin-2	MYH1;MYH2	1253	2.52071	0.209791	0.177858	0.408412	0.0951408	0.0913424	0.0678542	0.177858	966
H0YK48;P09493;P09493-6;P09493-9;Q6ZN40	Tropomyosin alpha-1 chain	TPM1	205	0.228877	0.0046175	0.034483	0.17564	0.183828	0.311939	0.0855506	0.17564	967
P06732	Creatine kinase M-type;Creatine kinase M-type. N-terminally processed	CKM	116	5.81391	0.056137	0.111605	0.172802	0.352534	0.339372	0.0202595	0.172802	968
Q13642-5	Four and a half LIM domains protein 1	FHL1	73	2.97266	0.143761	0.393907	0.101895	0.167376	1.09915	0.0760929	0.167376	969
P12883;P13533	Myosin-7;Myosin-6	MYH7;MYH6	1165	0.0493654	0.0596118	0.0776576	0.2015	0.155868	0.249326	0.170896	0.155868	970
Q96A32	Myosin regulatory light chain 2. skeletal muscle isoform	MYLPF	112	0.0363737	0.222942	0.190715	0.102899	0.165138	0.121907	0.143606	0.143606	971
Q96A32	Myosin regulatory light chain 2. skeletal muscle isoform	MYLPF	116	0.023115	0.222942	0.190715	0.102899	0.165138	0.121907	0.143606	0.143606	972
P06732	Creatine kinase M-type;Creatine kinase M-type. N-terminally processed	CKM	101	1.09634	0.117175	0.0602469	0.146141	0.139424	0.149257	0.04184	0.139424	973
P06753;P06753-5	Tropomyosin alpha-3 chain	TPM3	206	0.0220626	0.0327188	0.13015	0.318682	0.319734	0.331001	0.0165123	0.13015	974
P05976	Myosin light chain 1/3. skeletal muscle isoform	MYL1	44	0.138114	0.129209	0.0822073	1.6011	0.949459	0.12379	0.0811173	0.129209	975
P12883	Myosin-7	MYH7	1247	2.7156	0.278127	0.121768	0.332498	0.0496301	0.0453333	0.0311256	0.121768	976
P06732	Creatine kinase M-type;Creatine kinase M-type. N-terminally processed	CKM	247	0.0769652	0.112274	0.102222	0.160459	0.163986	0.234309	0.0257646	0.112274	977
P10916	Myosin regulatory light chain 2. ventricular/cardiac muscle isoform	MYL2	104	0.00412899	0.373398	0.134232	0.0113898	0.0963598	0.127326	0.0195915	0.0963598	978
P07451	Carbonic anhydrase 3	CA3	131	0.0556497	0.0158239	0.0942875	0.0826013	0.184657	0.313029	0.15133	0.0942875	979
P07451	Carbonic anhydrase 3	CA3	135	0.054107	0.00995603	0.0942875	0.0826013	0.184657	0.313029	0.15133	0.0942875	980
P04406	Glyceraldehyde-3-phosphate dehydrogenase	GAPDH	251	0.0368186	0.207267	0.0713623	0.0926583	0.203709	0.0948812	0.0484795	0.0926583	981
P06732	Creatine kinase M-type;Creatine kinase M-type. N-terminally processed	CKM	15	0.0786263	0.0217116	0.0231106	0.0962754	0.129311	0.10423	0.0290595	0.0786263	982
P06732	Creatine kinase M-type;Creatine kinase M-type. N-terminally processed	CKM	11	1.98781	0.0677208	0.0106153	0.12738	0.398768	0.0311422	0.00612517	0.0677208	983
J3KN67;P06753	Tropomyosin alpha-3 chain	TPM3	31	0.371023	0.127431	0.0133759	0.20373	0.026865	0.0496753	0.0297526	0.0496753	984
F2Z337;P02144	Myoglobin	MB	35	0.824182	0.0144299	0.0136712	0.0764121	0.0493999	0.0317922	0.0124248	0.0317922	985
F2Z337;P02144	Myoglobin	MB	63	0.0297808	0.00927313	0.0162103	0.057729	0.0102773	0.0260336	0.0472831	0.0260336	986
B0QYF7;P02144	Myoglobin	MB	88	12.3868	0.0166771	0.0795142	0.0243872	0.225084	0.00713258	0.0187441	0.0243872	987
P04406	Glyceraldehyde-3-phosphate dehydrogenase	GAPDH	263	0.0260646	0.0496303	0.0128964	0.0111068	0.0434127	0.0201498	0.0176017	0.0201498	988
F2Z337;P02144	Myoglobin	MB	57	0.0153223	0.00859278	0.0162103	0.057729	0.0171479	0.0260336	0.0472831	0.0171479	989
