# Supplementary material for: High-intensity interval training remodels the proteome and acetylome of human skeletal muscle
Source: eLife. 2022 May 31;11:e69802. doi: 10.7554/eLife.69802 (PMC9154743; doi:10.7554/eLife.69802)
Supplement: Supplementary file 9. [file elife-69802-supp9.xlsx]

## Sheet: Supp_File9_ACI_1D_enrich
Category column	Category value	Size	Enrichment Score	P value	Benj. Hoch. FDR
GOBP name	muscle system process	37	-0.625483	5.05219e-10	1.5778e-06		Category column	Annotation type
GOBP name	muscle contraction	33	-0.6115	7.57404e-09	1.18269e-05		Category value	Annotation term
GOBP name	system process	51	-0.490863	2.18314e-08	2.27265e-05		Size	Number of proteins from the category in the acetylome
GOBP name	multicellular organismal process	84	-0.399288	3.68852e-08	2.87981e-05		Enrichment Score	1D enrichment score
GOBP name	actin filament-based process	31	-0.587426	6.79117e-08	4.24176e-05		P value	1D p-value
GOBP name	cellular component movement	37	-0.505967	4.91874e-07	0.00025602		Benj. Hoch. FDR	Benjamini-Hochberg FDR (<0.02) corrected p-value
GOBP name	actin filament-based movement	20	-0.668308	5.24479e-07	0.000163795
GOBP name	actin-mediated cell contraction	20	-0.668308	5.24479e-07	0.000181994
GOBP name	actin-myosin filament sliding	20	-0.668308	5.24479e-07	0.000204744
GOBP name	muscle filament sliding	20	-0.668308	5.24479e-07	0.000233993
GOBP name	metabolic process	257	0.333481	3.01447e-06	0.000855835
GOBP name	cellular metabolic process	244	0.312043	5.0826e-06	0.00132275
GOBP name	cellular ketone metabolic process	88	0.307658	1.64565e-05	0.00395335
GOBP name	developmental process	108	-0.288092	1.77229e-05	0.00395347
GOBP name	carboxylic acid metabolic process	85	0.299186	3.45019e-05	0.00718329
GOBP name	organic acid metabolic process	85	0.299186	3.45019e-05	0.00633819
GOBP name	oxoacid metabolic process	85	0.299186	3.45019e-05	0.00673433
GOBP name	small molecule metabolic process	177	0.257129	3.64786e-05	0.00632903
GOBP name	carboxylic acid catabolic process	36	0.406688	6.49512e-05	0.0101421
GOBP name	organic acid catabolic process	36	0.406688	6.49512e-05	0.0106759
GOBP name	vesicle-mediated transport	25	-0.47875	6.68361e-05	0.00993948
GOBP name	striated muscle contraction	17	-0.572095	6.95319e-05	0.00987037
GOBP name	primary metabolic process	205	0.249965	8.04192e-05	0.0109195
GOBP name	anatomical structure development	68	-0.302081	0.000113168	0.014726
GOBP name	biological regulation	173	-0.236188	0.000148398	0.0185378
GOBP name	regulation of biological process	159	-0.236356	0.000153823	0.0184765
GOCC name	contractile fiber part	48	-0.559203	5.06281e-10	2.22763e-07
GOCC name	mitochondrial part	128	0.341734	1.13733e-07	2.50214e-05
GOCC name	mitochondrial matrix	75	0.356741	2.27834e-06	0.000334157
GOCC name	intracellular organelle lumen	89	0.312763	1.10286e-05	0.00121314
GOCC name	Z disc	21	-0.568195	1.27603e-05	0.0011229
GOCC name	myosin complex	10	-0.792836	1.929e-05	0.0014146
GOCC name	plasma membrane	56	-0.352076	3.03753e-05	0.00190931
GOCC name	cytosol	135	-0.26582	3.07812e-05	0.00169296
GOCC name	mitochondrion	143	0.255002	5.44576e-05	0.00266237
GOCC name	cytoskeleton	40	-0.382459	8.36918e-05	0.00368244
GOCC name	organelle inner membrane	71	0.286522	0.000198264	0.00793057
GOCC name	non-membrane-bounded organelle	77	-0.276313	0.000218986	0.00741183
GOCC name	intracellular non-membrane-bounded organelle	77	-0.276313	0.000218986	0.00802948
GOCC name	mitochondrial inner membrane	70	0.285506	0.000225549	0.00708868
GOCC name	mitochondrial membrane	76	0.274408	0.000258746	0.00758988
GOCC name	cytoskeletal part	47	-0.32329	0.000367144	0.0100965
GOCC name	muscle myosin complex	6	-0.833825	0.000462384	0.0113027
GOCC name	myosin II complex	6	-0.833825	0.000462384	0.0119676
GOCC name	organelle lumen	98	0.236801	0.000602298	0.0139479
GOCC name	membrane-enclosed lumen	105	0.230317	0.000662922	0.0145843
GOMF name	structural molecule activity	37	-0.476658	2.15709e-06	0.00182706
GOMF name	structural constituent of muscle	23	-0.585201	2.73973e-06	0.00116028
GOMF name	cytoskeletal protein binding	32	-0.467452	1.32346e-05	0.00373656
GOMF name	binding	256	-0.306355	1.66315e-05	0.00352172
GOMF name	catalytic activity	203	0.268508	2.18654e-05	0.003704
Keywords	Transitpeptide	105	0.436667	1.08467e-10	3.81805e-08
Keywords	Mitochondrion	139	0.403995	1.94518e-10	3.42352e-08
Keywords	Muscleprotein	24	-0.660177	6.829e-08	8.01269e-06
Keywords	Repeat	53	-0.381494	9.9086e-06	0.000871957
Keywords	Acetylation	254	0.286493	4.99677e-05	0.00351772
Keywords	Actin-binding	22	-0.511117	6.02185e-05	0.00353282
Keywords	Myosin	6	-0.911504	0.000129259	0.00568738
Keywords	Motorprotein	6	-0.911504	0.000129259	0.00649986
Reactome	REACT_16969	19	-0.656442	1.50435e-06	0.000607759
