# Supplementary material for: High-intensity interval training remodels the proteome and acetylome of human skeletal muscle
Source: eLife. 2022 May 31;11:e69802. doi: 10.7554/eLife.69802 (PMC9154743; doi:10.7554/eLife.69802)
Supplement: Supplementary file 10. [file elife-69802-supp10.xlsx]

## Sheet: Supp_File10_Acetylome_Fisher
Category column	Category value	Background Matrix Size	Selection size	Category size	Intersection size	Enrichment factor	P value	Benj. Hoch. FDR
GOCC name	intracellular organelle lumen	432	164	104	57	1.4437	2.91e-05	0.0033655		Category column	Annotation type
GOCC name	intracellular organelle part	432	164	298	128	1.1314	0.000489	0.017378		Category value	Annotation term
GOCC name	membrane-enclosed lumen	432	164	122	62	1.3387	0.00024871	0.014038		Background Matrix Size	Total proteome size
GOCC name	mitochondrial inner membrane	432	164	87	47	1.423	0.00029191	0.014038		Selection size	Number of signifcantly regulated (Π < 0.05) proteins
GOCC name	mitochondrial matrix	432	164	88	55	1.6463	1.08e-07	2.5e-05		Category size	Number of proteins from the category in the total proteome
GOCC name	mitochondrial membrane	432	164	96	51	1.3994	0.00026286	0.014038		Intersection size	Number of signifcantly regulated (Π < 0.05) proteins in the category
GOCC name	mitochondrial part	432	164	156	85	1.4353	6.85e-08	2.5e-05		Enrichment factor	Fisher's exact test enrichment factor
GOCC name	mitochondrial proton-transporting ATP synthase complex	432	164	11	10	2.3947	0.00036463	0.014038		P value	Fisher's exact test p-value
GOCC name	mitochondrion	432	164	174	90	1.3625	7.11e-07	0.00010944		Benj. Hoch. FDR	Benjamini-Hochberg FDR (<0.02) corrected p-value
GOCC name	organelle inner membrane	432	164	88	48	1.4368	0.00018149	0.013975
GOCC name	organelle lumen	432	164	115	61	1.3972	5.38e-05	0.0049665
GOCC name	proton-transporting ATP synthase complex	432	164	11	10	2.3947	0.00036463	0.014038
GOCC name	proton-transporting two-sector ATPase complex	432	164	11	10	2.3947	0.00036463	0.014038
KEGG name	Citrate cycle (TCA cycle)	432	164	20	16	2.1073	9.58e-05	0.017731
Keywords	Mitochondrion	432	164	172	91	1.3936	1.15e-07	2.15e-05
Keywords	Transitpeptide	432	164	124	73	1.5507	1.18e-08	4.42e-06
